# Supplementary material for: Age and poverty status alter the coding and noncoding transcriptome
Source: publisher site journal article supplement (doi:10.18632/aging.101823), 2019-02-17
Supplement: Supplementary file [file aging-v11i4-101823-supplementary-material-SD1.pdf]

## SUPPLEMENTARY FIGURE

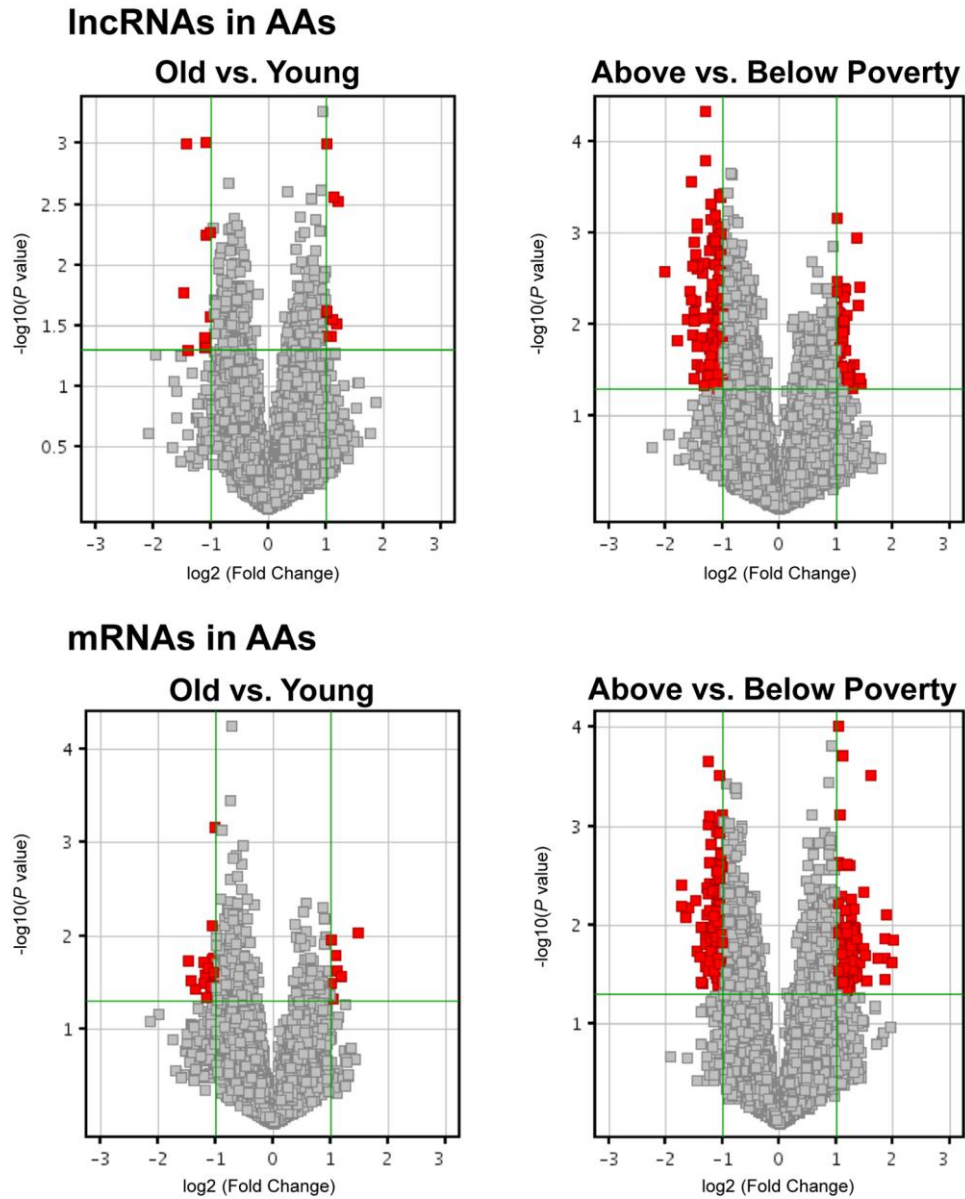

**Supplementary Figure 1. IncRNA and mRNA level changes with age and poverty in African American males.**

IncRNA and mRNA expression from African American (AA) young and old males living above or below poverty was assessed using microarray (Table 1A for demographic details). Volcano plots show  $\log_2$  fold change and P value for each IncRNA and mRNA. Red indicates IncRNAs and mRNAs that were  $>2$  fold change and  $P < 0.05$ . Comparisons between groups are indicated.
