# Supplementary material for: Age and poverty status alter the coding and noncoding transcriptome
Source: Aging (Albany NY). 2019 Feb 17;11(4):1189–203. doi: 10.18632/aging.101823 (PMC6402526; doi:10.18632/aging.101823)
Supplement: Supplementary Table 1 [file aging-11-101823-s002.xlsx]

## Sheet: up Y vs. O
Supplementary Table 1. lncRNAs significantly higher in abundance in young white males.
ProbeName	P-value	FDR	Fold Change	Regulation	type	seqname	GeneSymbol	source	RNAlength	chrom	strand	txStart	txEnd	Sequence	relationship	Associated_gene_acc	Associated_gene_name	Associated_protein_name	Associated_gene_strand	Associated_gene_start	Associated_gene_end	group-Y(normalized)	group-O(normalized)
ASHGA5P044158	0.00849549	0.0367261	18.5042	up	noncoding	ENST00000566457	CTD-3247F14.2	GENCODE	4997	chr8	-	22536525	22541522	ACTGCATTTGCATCTCGGATTGTGTTTTTAAACCCATTTTCTCCCATATTTGCCTGAAAA	intergenic							7.12041	2.91063
ASHGA5P037480	0.000547685	0.00855573	10.5198	up	noncoding	uc002ywy.3	AK027145	UCSC_knowngene	2046	chr21	+	39645397	39647443	CAGTGTAGTTCCCAATATGGCCTCATACTAACTTCAGATACCCCAGTGTATCTGAAGAAA	intron sense-overlapping	NM_002243	KCNJ15	ATP-sensitive inward rectifier potassium channel 15	+	39628663	39673746	6.1879	2.79285
ASHGA5P037480	0.000547685	0.00855573	10.5198	up	noncoding	uc002ywy.3	AK027145	UCSC_knowngene	2046	chr21	+	39645397	39647443	CAGTGTAGTTCCCAATATGGCCTCATACTAACTTCAGATACCCCAGTGTATCTGAAGAAA	intron sense-overlapping	NM_170736	KCNJ15	ATP-sensitive inward rectifier potassium channel 15	+	39628869	39673746	6.1879	2.79285
ASHGA5P037480	0.000547685	0.00855573	10.5198	up	noncoding	uc002ywy.3	AK027145	UCSC_knowngene	2046	chr21	+	39645397	39647443	CAGTGTAGTTCCCAATATGGCCTCATACTAACTTCAGATACCCCAGTGTATCTGAAGAAA	intron sense-overlapping	NM_170737	KCNJ15	ATP-sensitive inward rectifier potassium channel 15	+	39644428	39673746	6.1879	2.79285
ASHGA5P042724	0.00229308	0.0177041	10.1427	up	noncoding	ENST00000446476	RP5-826L7.1	GENCODE	600	chr6	+	164007614	164009197	CTGTAGTTTTCCAGCAAAATCTAGCTAAACTCCTACCACAAATGTAACAGGCATATAAAA	intergenic							5.92449	2.58212
ASHGA5P038645	0.000431554	0.00752243	9.57353	up	noncoding	ENST00000440850	SDHAP1	pseudogene	2000	chr3	-	195690205	195717129	AAGAAGCCCTTTGAGGAGCACTGGAGGAAGCACACCCTGTCCTATGTGGACGTCAGCACT								7.60646	4.34741
ASHGA5P019617	7.90071e-05	0.00299804	8.93734	up	noncoding	ENST00000496359	RP11-773D16.1	GENCODE	387	chr10	-	81564240	81586109	CAGCCCTAAGCAACCATCTTTCCTGTGAAAAATTCCCTCTCGTACTTTAGTTCTGTGGAT	intergenic							7.30376	4.14392
ASHGA5P037531	0.00193874	0.016252	8.67248	up	noncoding	NR_046400	DIP2A-IT1	RefSeq	428	chr21	+	47882383	47889218	CTCCAGCACCTTGCACATTTTAGGCATTTTAATGGATGCTTATTGAGTTAATAAAAGTGA	intron sense-overlapping	NM_001146114	DIP2A	disco-interacting protein 2 homolog A isoform e	+	47878861	47976432	9.97386	6.85742
ASHGA5P037531	0.00193874	0.016252	8.67248	up	noncoding	NR_046400	DIP2A-IT1	RefSeq	428	chr21	+	47882383	47889218	CTCCAGCACCTTGCACATTTTAGGCATTTTAATGGATGCTTATTGAGTTAATAAAAGTGA	intron sense-overlapping	NM_001146115	DIP2A	disco-interacting protein 2 homolog A isoform f	+	47878861	47967120	9.97386	6.85742
ASHGA5P037531	0.00193874	0.016252	8.67248	up	noncoding	NR_046400	DIP2A-IT1	RefSeq	428	chr21	+	47882383	47889218	CTCCAGCACCTTGCACATTTTAGGCATTTTAATGGATGCTTATTGAGTTAATAAAAGTGA	intron sense-overlapping	NM_001146116	DIP2A	disco-interacting protein 2 homolog A isoform g	+	47878861	47989926	9.97386	6.85742
ASHGA5P037531	0.00193874	0.016252	8.67248	up	noncoding	NR_046400	DIP2A-IT1	RefSeq	428	chr21	+	47882383	47889218	CTCCAGCACCTTGCACATTTTAGGCATTTTAATGGATGCTTATTGAGTTAATAAAAGTGA	intron sense-overlapping	NM_015151	DIP2A	disco-interacting protein 2 homolog A isoform a	+	47878861	47989926	9.97386	6.85742
ASHGA5P037531	0.00193874	0.016252	8.67248	up	noncoding	NR_046400	DIP2A-IT1	RefSeq	428	chr21	+	47882383	47889218	CTCCAGCACCTTGCACATTTTAGGCATTTTAATGGATGCTTATTGAGTTAATAAAAGTGA	intron sense-overlapping	NM_206889	DIP2A	disco-interacting protein 2 homolog A isoform b	+	47878861	47970023	9.97386	6.85742
ASHGA5P037531	0.00193874	0.016252	8.67248	up	noncoding	NR_046400	DIP2A-IT1	RefSeq	428	chr21	+	47882383	47889218	CTCCAGCACCTTGCACATTTTAGGCATTTTAATGGATGCTTATTGAGTTAATAAAAGTGA	intron sense-overlapping	NM_206890	DIP2A	disco-interacting protein 2 homolog A isoform c	+	47878861	47967120	9.97386	6.85742
ASHGA5P037531	0.00193874	0.016252	8.67248	up	noncoding	NR_046400	DIP2A-IT1	RefSeq	428	chr21	+	47882383	47889218	CTCCAGCACCTTGCACATTTTAGGCATTTTAATGGATGCTTATTGAGTTAATAAAAGTGA	intron sense-overlapping	NM_206891	DIP2A	disco-interacting protein 2 homolog A isoform d	+	47878861	47966219	9.97386	6.85742
ASHGA5P048234	0.000553258	0.00860302	8.46764	up	noncoding	ENST00000533502	CTD-3074O7.5	GENCODE	581	chr11	-	66241829	66247663	CTGTACCACAAGGAGCTGCCACTAACACCTGTGTCAGAACTACTGTAAGGACCCTTTCCT	intronic antisense	NM_001098510	PELI3	E3 ubiquitin-protein ligase pellino homolog 3 isoform 2	+	66234335	66244808	6.63412	3.55217
ASHGA5P048234	0.000553258	0.00860302	8.46764	up	noncoding	ENST00000533502	CTD-3074O7.5	GENCODE	581	chr11	-	66241829	66247663	CTGTACCACAAGGAGCTGCCACTAACACCTGTGTCAGAACTACTGTAAGGACCCTTTCCT	intronic antisense	NM_001243135	PELI3	E3 ubiquitin-protein ligase pellino homolog 3 isoform 3	+	66233797	66244808	6.63412	3.55217
ASHGA5P048234	0.000553258	0.00860302	8.46764	up	noncoding	ENST00000533502	CTD-3074O7.5	GENCODE	581	chr11	-	66241829	66247663	CTGTACCACAAGGAGCTGCCACTAACACCTGTGTCAGAACTACTGTAAGGACCCTTTCCT	intronic antisense	NM_001243136	PELI3	E3 ubiquitin-protein ligase pellino homolog 3 isoform 4	+	66234335	66244808	6.63412	3.55217
ASHGA5P048234	0.000553258	0.00860302	8.46764	up	noncoding	ENST00000533502	CTD-3074O7.5	GENCODE	581	chr11	-	66241829	66247663	CTGTACCACAAGGAGCTGCCACTAACACCTGTGTCAGAACTACTGTAAGGACCCTTTCCT	intronic antisense	NM_145065	PELI3	E3 ubiquitin-protein ligase pellino homolog 3 isoform 1	+	66234335	66244808	6.63412	3.55217
ASHGA5P048234	0.000553258	0.00860302	8.46764	up	noncoding	ENST00000533502	CTD-3074O7.5	GENCODE	581	chr11	-	66241829	66247663	CTGTACCACAAGGAGCTGCCACTAACACCTGTGTCAGAACTACTGTAAGGACCCTTTCCT	natural antisense	NM_001256670	DPP3	dipeptidyl peptidase 3 isoform 2	+	66247483	66277130	6.63412	3.55217
ASHGA5P048234	0.000553258	0.00860302	8.46764	up	noncoding	ENST00000533502	CTD-3074O7.5	GENCODE	581	chr11	-	66241829	66247663	CTGTACCACAAGGAGCTGCCACTAACACCTGTGTCAGAACTACTGTAAGGACCCTTTCCT	natural antisense	NM_005700	DPP3	dipeptidyl peptidase 3 isoform 1	+	66247483	66277130	6.63412	3.55217
ASHGA5P048234	0.000553258	0.00860302	8.46764	up	noncoding	ENST00000533502	CTD-3074O7.5	GENCODE	581	chr11	-	66241829	66247663	CTGTACCACAAGGAGCTGCCACTAACACCTGTGTCAGAACTACTGTAAGGACCCTTTCCT	natural antisense	NM_130443	DPP3	dipeptidyl peptidase 3 isoform 1	+	66247483	66277130	6.63412	3.55217
ASHGA5P019149	0.00260388	0.0188613	7.60063	up	noncoding	ENST00000488805	RP11-773D16.1	GENCODE	428	chr10	-	81564240	81586160	TTTACTGGTGTTCCAGCCCTAAGAAACCTTTGTTCAAGAAAACGGCAGATGCTCTGTTGA	intergenic							8.18142	5.2553
ASHGA5P044977	0.00492427	0.02706	7.45873	up	noncoding	ENST00000418348	RP4-803J11.2	GENCODE	640	chr1	+	229455149	229458834	GACCATCAGACTGTTAACAACTATCAAATTTTCACAGGTTCAAAAGGTAATTGACACTCT	natural antisense	NM_145257	CCSAP	uncharacterized protein C1orf96	-	229456751	229478688	6.83085	3.93192
ASHGA5P022447	0.0108068	0.0426034	7.3892	up	noncoding	NR_037600	LOC100507217	RefSeq	1593	chr15	+	93426072	93441977	CTCGGACCCGGTGACTTAAGAGATTAAAATTAATTTGGTTGCTGTTGGTTCTGAACAAAT	exon sense-overlapping	ENST00000556722	CHD2	chromodomain helicase DNA binding protein 2 [Source:HGNC Symbol;Acc:1917]	+	93426525	93480855	6.69418	3.80876
ASHGA5P042295	3.28921e-05	0.00175151	7.16246	up	noncoding	uc003nhj.3	BC079832	UCSC_knowngene	557	chr6	+	26272385	26272942	TAGACTGTGCTATCTCCTGAACACAGATTTCAGCCAATCGAAAAGCAGGTGTTTAAAAAA	bidirectional	NM_003534	HIST1H3G	histone H3.1	-	26271145	26271612	6.55982	3.71936
ASHGA5P034742	0.00300199	0.020369	7.1037	up	noncoding	ENST00000573896	LINC00085	GENCODE	554	chr19	+	52207573	52215640	TGAGTGAGTGAACTCTGTGCGAGATAAATTGGAGACAAATATGGACAACTCTCCCAAGGA	intergenic							7.03934	4.21077
ASHGA5P049342	0.0133837	0.0482641	6.89421	up	noncoding	ENST00000564138	RP11-510J16.3	GENCODE	2775	chr16	+	81993523	81996298	CTCAACCCTTTTGACTTTAAAAGGAAAATAGCTTAACCTTCAACCTGTGTGACATTTAAC	intergenic							6.17608	3.39069
ASHGA5P048458	0.00392615	0.0238492	6.87966	up	noncoding	AK098597		LincRNAs identified by Khalil et al	1683	chr4	+	42097863	42101378	AATACCATCTTATTCTAGCAAGAGTATCAGAGTGCGTTCATTCCTGAGGACCCTTTCCCT	intergenic							6.20542	3.42308
ASHGA5P053590	0.00096145	0.011469	6.82804	up	noncoding	ENST00000521207	RP13-582O9.5	GENCODE	429	chr8	-	144363195	144363780	GTGAAAAAATGTGAATTGTTCTACTCATCTGGAAAAGAGAACCCTGAGGCAGGAACAAGT	intergenic							5.94896	3.17749
ASHGA5P030138	0.00527509	0.02828	6.63992	up	noncoding	ENST00000565181	RP11-1007O24.3	GENCODE	2325	chr15	-	72765184	72767509	CCCCTGATTTGTTGATAAATCTTACTGTTCAACCTATAGGTTCCCTTTGGAAATTGATTT	natural antisense	NM_005744	ARIH1	E3 ubiquitin-protein ligase ARIH1	+	72766666	72878896	5.89163	3.16046
ASHGA5P031573	0.0231965	0.0658429	6.59229	up	noncoding	TCONS_00006666	XLOC_003262	LincRNAs identified by Cabili et al	943	chr3	-	134294593	134299804	GGAGAGAATTTAAGGGGGCTTACATGTAAAAGTCATTGCATTTCTCTGCAATATGTAATT	intergenic							7.02257	4.3018
ASHGA5P023233	0.000464097	0.00783729	6.5489	up	noncoding	ENST00000575139	RP11-473M20.14	GENCODE	530	chr16	-	3166456	3182054	CCGGACCAAGTGTTCATCCATCGCCCTGTATTAGCGAAGAACAACATCAAGCTGGCTAGC	natural antisense	NM_001042428	ZNF205	zinc finger protein 205	+	3162562	3170518	6.9003	4.18905
ASHGA5P023233	0.000464097	0.00783729	6.5489	up	noncoding	ENST00000575139	RP11-473M20.14	GENCODE	530	chr16	-	3166456	3182054	CCGGACCAAGTGTTCATCCATCGCCCTGTATTAGCGAAGAACAACATCAAGCTGGCTAGC	natural antisense	NM_003456	ZNF205	zinc finger protein 205	+	3162562	3170518	6.9003	4.18905
ASHGA5P043675	0.000318947	0.00639655	6.52959	up	noncoding	TCONS_00018121	XLOC_008382	LincRNAs identified by Cabili et al	371	chr10	+	8137922	8139176	TCATCCTTGAAGGCAGAAACCATGTGTCCCCAGAAGTATGTTGGCTCTCAATAAGTAGCT	intergenic							6.22027	3.51327
ASHGA5P043717	0.0079603	0.0353403	6.52219	up	noncoding	NR_037776	WBSCR22	RefSeq	1452	chr7	+	73097897	73112551	TCTCTGGTAAATCAACTTTAAGTTGCCGACCTCTCTGGGCCTCGGTACCTCAGCGTTGAG	exon sense-overlapping	NM_001202560	WBSCR22	uncharacterized methyltransferase WBSCR22 isoform 1	+	73097897	73112551	8.4262	5.72084
ASHGA5P043717	0.0079603	0.0353403	6.52219	up	noncoding	NR_037776	WBSCR22	RefSeq	1452	chr7	+	73097897	73112551	TCTCTGGTAAATCAACTTTAAGTTGCCGACCTCTCTGGGCCTCGGTACCTCAGCGTTGAG	exon sense-overlapping	NM_017528	WBSCR22	uncharacterized methyltransferase WBSCR22 isoform 2	+	73097897	73112551	8.4262	5.72084
ASHGA5P033456	0.000648232	0.00959446	6.40624	up	noncoding	uc010wyg.2	FJ009034	UCSC_knowngene	462	chr17_ctg5_hap1	-	1320859	1323954	ACGTGCGGCGACGGCACGCAGCACTGCGGCAGGGGGAAGCCAGCCCTCGCTGCGGCCGAG	intergenic							5.39847	2.719
ASHGA5P023262	0.00406068	0.0243614	6.40097	up	noncoding	NR_037688	ACTG1	RefSeq	1855	chr17	-	79476996	79479892	AAGTTAACTGTTCCCCTTGGGTATTAACGTGTCAGGGCTGAGTGTTCTGGGATTTCTCTA	exon sense-overlapping	NM_001199954	ACTG1	actin, cytoplasmic 2	-	79476996	79479892	9.85311	7.17482
ASHGA5P023262	0.00406068	0.0243614	6.40097	up	noncoding	NR_037688	ACTG1	RefSeq	1855	chr17	-	79476996	79479892	AAGTTAACTGTTCCCCTTGGGTATTAACGTGTCAGGGCTGAGTGTTCTGGGATTTCTCTA	exon sense-overlapping	NM_001614	ACTG1	actin, cytoplasmic 2	-	79476996	79479892	9.85311	7.17482
ASHGA5P019912	0.0102721	0.041326	6.30358	up	noncoding	ENST00000506340	CTC-338M12.4	GENCODE	687	chr5	+	180673524	180684245	TCCATACAAGCTTGCAGAGTCAAGACGAACTCTAACTCATGGGATGGACAAACTGGAAGA	natural antisense	NM_032765	TRIM52	tripartite motif-containing protein 52	-	180683385	180688119	5.81534	3.15917
ASHGA5P023294	0.0285489	0.0744483	6.0556	up	noncoding	ENST00000577672	RP1-283E3.4	GENCODE	409	chr1	+	1655950	1667412	TGGTTACCTCGTGAGGCGCCTCAGATTCTTCTGGAGCTGGAGATGAACTCGGACCTCAAG	intronic antisense	NM_001199787	SLC35E2	solute carrier family 35 member E2 isoform 2	-	1656276	1677438	9.93534	7.33707
ASHGA5P023294	0.0285489	0.0744483	6.0556	up	noncoding	ENST00000577672	RP1-283E3.4	GENCODE	409	chr1	+	1655950	1667412	TGGTTACCTCGTGAGGCGCCTCAGATTCTTCTGGAGCTGGAGATGAACTCGGACCTCAAG	intronic antisense	NM_182838	SLC35E2	solute carrier family 35 member E2 isoform 1	-	1658823	1677438	9.93534	7.33707
ASHGA5P053936	0.0130496	0.0475363	5.99372	up	noncoding	uc022bty.1	AK310094	UCSC_knowngene	276	chrX	+	23801293	23801569	CAGTGACATACTGCGGCTGATCAAGGTAGCGGAGAGCCAGAGCTCCTCCCGGGGCGTGGG	exon sense-overlapping	NM_002970	SAT1	diamine acetyltransferase 1	+	23801274	23804327	6.16013	3.57668
ASHGA5P051021	0.00205965	0.016733	5.88429	up	noncoding	ENST00000428008	ZNFX1-AS1	GENCODE	566	chr20	+	47895178	47905797	CTAGTTGCAGTCAGGCTTCATACGCTATTGTCCTGCCCGTAAGTTCCCGTTTTGTGTGTG	bidirectional	NM_021035	ZNFX1	NFX1-type zinc finger-containing protein 1	-	47862438	47894756	8.37901	5.82214
ASHGA5P023061	0.0136139	0.0486619	5.70736	up	noncoding	ENST00000568835	CTD-2576F9.2	GENCODE	675	chr15	+	95399058	95400214	CGCCGTGGAGGCCGAGGCTGACAAGCCCCGAAGGCTGGGGCGGCTCAAGTACCAGGCACC	intergenic							6.52018	4.00736
ASHGA5P043834	0.00998886	0.040558	5.51803	up	noncoding	ENST00000420058	RP11-645N11.2	GENCODE	1072	chr7	+	102613968	102629303	GGCTGCTTATCCCACTGATTCTGATCTGACTGTGTTAAGTAATAAATCATGTGGTTACAT	intronic antisense	NM_001111038	FBXL13	F-box/LRR-repeat protein 13 isoform 2	-	102453307	102715288	6.2005	3.73634
ASHGA5P043834	0.00998886	0.040558	5.51803	up	noncoding	ENST00000420058	RP11-645N11.2	GENCODE	1072	chr7	+	102613968	102629303	GGCTGCTTATCCCACTGATTCTGATCTGACTGTGTTAAGTAATAAATCATGTGGTTACAT	intronic antisense	NM_145032	FBXL13	F-box/LRR-repeat protein 13 isoform 1	-	102453307	102715015	6.2005	3.73634
ASHGA5P027804	8.30444e-06	0.000839425	5.5145	up	noncoding	ENST00000539795	RP11-90D4.3	GENCODE	602	chr12	+	8474548	8482210	CCTGGCACAAAAGAGTTGCTCAATAAATAAATCAGGATGAATGAATAAACACATGGATAG	intergenic							6.26432	3.80109
ASHGA5P036176	0.0285946	0.0745042	5.36316	up	noncoding	ENST00000453636	AC092620.3	GENCODE	680	chr2	+	139362079	139370737	GTGGAACTGTATTCTCTAATCAATATTAGCACATACATATTGCCCCAGACTGTACCTCCT	intergenic							6.57685	4.15377
ASHGA5P015795	0.02749	0.0729244	5.26325	up	noncoding	ENST00000423617	RP11-622K12.1	GENCODE	541	chrX	+	56755788	56844059	CCTAAACCAGTCTTATGATGTAATCAGCGCGATTTCACTTCCTGAATTTCGATGAATTCT	intergenic							6.47588	4.07993
ASHGA5P036954	1.7595e-07	7.7259e-05	5.26248	up	noncoding	TCONS_00025419	XLOC_012229	LincRNAs identified by Cabili et al	242	chr17	+	47308233	47313691	GCTCTAGAGAAAGTGTTCCTGCCTCCTGCTAGGCAAGGTGATGCCCTAGGGGAAAGGAAG	intergenic							5.40061	3.00487
ASHGA5P045168	0.0028709	0.0199793	5.19269	up	noncoding	ENST00000436039	RP4-781K5.2	GENCODE	693	chr1	+	234742753	234745229	TTTTTCACTTTCACATCTCCAGCAAGGATGGTTGCAATTTCCCCTTGCATAAAGGCCCAG	natural antisense	NM_001077397	IRF2BP2	interferon regulatory factor 2-binding protein 2 isoform B	-	234740014	234745271	7.44652	5.07004
ASHGA5P045168	0.0028709	0.0199793	5.19269	up	noncoding	ENST00000436039	RP4-781K5.2	GENCODE	693	chr1	+	234742753	234745229	TTTTTCACTTTCACATCTCCAGCAAGGATGGTTGCAATTTCCCCTTGCATAAAGGCCCAG	natural antisense	NM_182972	IRF2BP2	interferon regulatory factor 2-binding protein 2 isoform A	-	234740014	234745271	7.44652	5.07004
ASHGA5P036493	1.035e-08	1.0604e-05	5.11383	up	noncoding	uc021vxq.1	AX748395	UCSC_knowngene	2038	chr2	+	227859553	227861591	CTAGGGTACACATGCCTTGTCACGTCAGAATGATTGATTTTTCCTTTGGCTTTCTCACTA	exon sense-overlapping	NM_001167608	RHBDD1	rhomboid domain-containing protein 1	+	227700670	227863923	5.00413	2.64973
ASHGA5P036493	1.035e-08	1.0604e-05	5.11383	up	noncoding	uc021vxq.1	AX748395	UCSC_knowngene	2038	chr2	+	227859553	227861591	CTAGGGTACACATGCCTTGTCACGTCAGAATGATTGATTTTTCCTTTGGCTTTCTCACTA	exon sense-overlapping	NM_032276	RHBDD1	rhomboid domain-containing protein 1	+	227700670	227863923	5.00413	2.64973
ASHGA5P023079	0.00458337	0.0259921	5.03977	up	noncoding	uc002fqw.3	BC071667	UCSC_knowngene	1618	chr16	+	90244124	90289081	TTACAAAGCTGCCTCGAGCAGAAGAATCCCAGACTTCTTAGAGAACCCAGTGACTTTTTG	intergenic							5.6829	3.34954
ASHGA5P042852	0.0169063	0.055496	4.95015	up	noncoding	uc011jsq.2	HLA-DQB	UCSC_knowngene	732	chr6_ssto_hap7	-	4056463	4058803	TTTTAACTGGGATTGGTTATCACTTTTCTGTAACGCCTGCTTGTCCCTGCCCAGAATTCC	intergenic							8.30099	5.99352
ASHGA5P030559	0.0113795	0.043819	4.91849	up	noncoding	uc010ugt.1	LOC283663	UCSC_knowngene	2536	chr15	+	57592562	57599965	TCATTTAACCCCAAAATCAGTGATTCTACATCTCAAGCTCATATTTTGAAGTGTTTACGG	intergenic							5.44922	3.151
ASHGA5P036349	1.29685e-05	0.00111596	4.8928	up	noncoding	TCONS_00026291	XLOC_012633	LincRNAs identified by Cabili et al	231	chr18	+	12890076	12892246	CAAAAACTCCCTGCTTCACCTTTTTGTTAAGACAGATTTGAGAGATCTTGCCCTCCTGCC	intergenic							6.59346	4.3028
ASHGA5P015739	0.00404744	0.0243449	4.87842	up	noncoding	ENST00000423083	NCF1B	GENCODE	1516	chr7	+	72634673	72649979	AGCTGTTGAGGAAAGACGACGTCACAGGCTACTTCCCGTCCATGTACCTGCAAAAGTCAG	intergenic							5.56172	3.27531
ASHGA5P038198	0.000273934	0.00589626	4.84271	up	noncoding	NR_046757	SNRK-AS1	RefSeq	3475	chr3	-	43388410	43393454	AAACCTGAACACCACGTCTTGTTTCTTTGGTTCTTAGATCACATAAAGGTATATTACTAC	natural antisense	NM_001100594	SNRK	SNF-related serine/threonine-protein kinase	+	43328003	43392634	7.44351	5.1677
ASHGA5P038198	0.000273934	0.00589626	4.84271	up	noncoding	NR_046757	SNRK-AS1	RefSeq	3475	chr3	-	43388410	43393454	AAACCTGAACACCACGTCTTGTTTCTTTGGTTCTTAGATCACATAAAGGTATATTACTAC	natural antisense	NM_017719	SNRK	SNF-related serine/threonine-protein kinase	+	43328003	43392634	7.44351	5.1677
ASHGA5P038839	0.00242312	0.0181655	4.80997	up	noncoding	ENST00000432395	RP5-943J3.1	GENCODE	509	chr1	+	90254472	90256051	GGAGCACCATGAACTTTCTCAACCTACAGGCCAACATATTTTATTTTATATTCTTATGTC	intergenic							5.65272	3.38669
ASHGA5P019035	0.00350071	0.0223959	4.79516	up	noncoding	ENST00000471091	RP11-2A4.3	GENCODE	433	chr3	+	137493385	137496438	TGTGCCTTAGATTTAGAATTCCACCCTCAGTTGGAATACAGATGATCCCTAACAAGTCAC	intergenic							9.37164	7.11006
ASHGA5P023488	0.0146513	0.0511354	4.77603	up	noncoding	NR_034041	SRSF1	RefSeq	4747	chr17	-	56078279	56084707	GGAGGCAATGGTTTGGATTGGAGAGGGCTCACTGGATCCCAATCCTTGGAGCTGGATCAT	exon sense-overlapping	NM_001078166	SRSF1	serine/arginine-rich splicing factor 1 isoform 2	-	56078279	56084707	5.26882	3.013
ASHGA5P023488	0.0146513	0.0511354	4.77603	up	noncoding	NR_034041	SRSF1	RefSeq	4747	chr17	-	56078279	56084707	GGAGGCAATGGTTTGGATTGGAGAGGGCTCACTGGATCCCAATCCTTGGAGCTGGATCAT	exon sense-overlapping	NM_006924	SRSF1	serine/arginine-rich splicing factor 1 isoform 1	-	56078279	56084707	5.26882	3.013
ASHGA5P018285	0.025855	0.0704755	4.61828	up	noncoding	ENST00000451583	RP11-622K12.1	GENCODE	305	chrX	+	56755805	56843809	CCCAACGGAGTCTTTGAGTGATTGCAGTATGACTCCATTTCCCTGGTGCATTCATATAAT	intergenic							6.67774	4.47038
ASHGA5P034820	0.0117666	0.0446686	4.5918	up	noncoding	ENST00000493504	AC016629.2	GENCODE	3282	chr19	+	59086826	59095764	GTCTAGAATCAGAGTTGGATGAGAAATCAACTTTGAACACCACCTTTGGGGTGGCTGCAT	intergenic							7.11259	4.91353
ASHGA5P053393	0.00922522	0.03854	4.56153	up	noncoding	ENST00000434796	GAS5	GENCODE	575	chr1	-	173833117	173834039	CTGATATTCTGCATTCCCATGTAGCATTTTAATTGAAGTCTGTAAATGTGGCTAAAAGTC	intergenic							6.30656	4.11704
ASHGA5P030071	0.0121313	0.045528	4.55133	up	noncoding	TCONS_00008016	XLOC_003481	LincRNAs identified by Cabili et al	229	chr4	+	26784348	26784724	CCTTGTGACAACAAAAGACAACTCAAATCAGCTTCAAGCATGGATCATAACTAACCGCGG	intergenic							5.81329	3.627
ASHGA5P016768	0.0130377	0.0475363	4.51612	up	noncoding	NR_038367	HOTAIRM1	RefSeq	783	chr7	+	27135712	27139877	CTGGCGAGAGGTCTGTTTTGCCTGAACCCATCAACAGCTGGGAGATTAATCAACCACACT	natural antisense	ENST00000222718	HOXA2	homeobox A2 [Source:HGNC Symbol;Acc:5103]	-	27139720	27142430	10.0355	7.86039
ASHGA5P033228	0.00186344	0.0158659	4.50038	up	noncoding	ENST00000416221	RP11-295G20.2	GENCODE	465	chr1	-	231658133	231664302	GGAATAGCTTGTTATGCAACAATACATAATTAATACACTGGTCTCCCACTTTCAAGTTTG	natural antisense	ENST00000366639	TSNAX	translin-associated factor X [Source:HGNC Symbol;Acc:12380]	+	231664286	231702270	5.18954	3.0195
ASHGA5P030514	0.00556224	0.0291252	4.44894	up	noncoding	uc001zvn.1	HMGN2P46	UCSC_knowngene	1682	chr15	+	45803333	45848928	TATGAAACAGCATGCTAAATGTGAAATGTCAACCCTCACTAAACTTTGCCGGTTCAGAGC	natural antisense	NM_013309	SLC30A4	zinc transporter 4	-	45774679	45815002	7.19659	5.04313
ASHGA5P020649	0.00873432	0.037225	4.44425	up	noncoding	ENST00000517959	CTD-2336O2.1	GENCODE	917	chr8	-	1710246	1712668	GGGCACACAGAATCGACATCTAGAGGAGTACTCACCACTTAATTGATGATCAATACACGT	intronic antisense	NM_018941	CLN8	protein CLN8	+	1711869	1734736	5.74519	3.59325
ASHGA5P056574	0.00255062	0.0186513	4.41063	up	noncoding	TCONS_00006196	XLOC_002793	LincRNAs identified by Cabili et al	355	chr3	+	125485333	125505694	ACCGGCACCCAGACAGGTGGCGACGGCAGAGGAGAAGGAAAATACATGTACAGCCAACTT	intergenic							9.22744	7.08645
ASHGA5P050955	0.000236449	0.00542362	4.36291	up	noncoding	ENST00000440595	RP5-1125A11.1	GENCODE	660	chr20	-	32580293	32582161	TTCTCAAAAGAACTCTTCCCTGAACACCTTGTCTCAAGATGTTCTCTAGTTTGTCTTCTT	intronic antisense	NM_007367	RALY	RNA-binding protein Raly isoform 2	+	32581457	32670991	5.96772	3.84243
ASHGA5P050955	0.000236449	0.00542362	4.36291	up	noncoding	ENST00000440595	RP5-1125A11.1	GENCODE	660	chr20	-	32580293	32582161	TTCTCAAAAGAACTCTTCCCTGAACACCTTGTCTCAAGATGTTCTCTAGTTTGTCTTCTT	intronic antisense	NM_016732	RALY	RNA-binding protein Raly isoform 1	+	32581457	32670991	5.96772	3.84243
ASHGA5P015989	1.29241e-05	0.00111596	4.33403	up	noncoding	ENST00000425554	RP11-399E6.1	GENCODE	623	chr1	+	41708044	41730230	CACCCGGAGGGCCTTCAGACCTGAGCTGAAATCTACACCACCGGCTCTCTGACTATCAGG	bidirectional	NM_001172218	SCMH1	polycomb protein SCMH1 isoform c	-	41492870	41707815	5.14968	3.03397
ASHGA5P015989	1.29241e-05	0.00111596	4.33403	up	noncoding	ENST00000425554	RP11-399E6.1	GENCODE	623	chr1	+	41708044	41730230	CACCCGGAGGGCCTTCAGACCTGAGCTGAAATCTACACCACCGGCTCTCTGACTATCAGG	bidirectional	NM_001172219	SCMH1	polycomb protein SCMH1 isoform d	-	41492870	41707815	5.14968	3.03397
ASHGA5P015989	1.29241e-05	0.00111596	4.33403	up	noncoding	ENST00000425554	RP11-399E6.1	GENCODE	623	chr1	+	41708044	41730230	CACCCGGAGGGCCTTCAGACCTGAGCTGAAATCTACACCACCGGCTCTCTGACTATCAGG	bidirectional	NM_001172220	SCMH1	polycomb protein SCMH1 isoform c	-	41492870	41707815	5.14968	3.03397
ASHGA5P015989	1.29241e-05	0.00111596	4.33403	up	noncoding	ENST00000425554	RP11-399E6.1	GENCODE	623	chr1	+	41708044	41730230	CACCCGGAGGGCCTTCAGACCTGAGCTGAAATCTACACCACCGGCTCTCTGACTATCAGG	bidirectional	NM_012236	SCMH1	polycomb protein SCMH1 isoform b	-	41492870	41707815	5.14968	3.03397
ASHGA5P032861	0.000735204	0.0100577	4.33037	up	noncoding	ENST00000583262	RP11-214O1.2	GENCODE	1652	chr17	+	14207170	14208822	GAAAGAACCTGCCCTTTACATTTAGGCTTGGGATGTTAATTTAAAGTTTGAATGACCAAA	intron sense-overlapping	NM_006041	HS3ST3B1	heparan sulfate glucosamine 3-O-sulfotransferase 3B1	+	14204505	14249492	5.90833	3.79384
ASHGA5P039312	0.00117458	0.0125647	4.30149	up	noncoding	ENST00000510506	FAM86EP	pseudogene	987	chr4	-	3945000	3957146	ACCAGAAACTGTTTCCCTACAAAGAGCACTTGGAGATGGCAATGCTGAACCTAATACTGT								5.8849	3.78006
ASHGA5P045340	0.0323319	0.0796082	4.26471	up	noncoding	NR_023390	LINC00476	RefSeq	8030	chr9	-	98568369	98638259	GCGTTTGTAATTCAGCATCTTAAAATGTCTCTTTTGGCAGTATTTCTTTACAAATGTGGC	natural antisense	NM_001010895	ERCC6L2	RAD26L hypothetical protein	+	98637899	98731122	5.81964	3.72719
ASHGA5P044558	0.0101933	0.0411639	4.2495	up	noncoding	ENST00000520885	RP11-809O17.1	GENCODE	483	chr8	-	142136142	142138220	CTCTCAGGGACACTGTGAAGACCAAACGAGAAAATAGAAACAAACATAATTTATAAACCA	intronic antisense	ENST00000519291	DENND3	DENN/MADD domain containing 3 [Source:HGNC Symbol;Acc:29134]	+	142127376	142151375	5.69223	3.60494
ASHGA5P047197	0.0268268	0.0719098	4.2493	up	noncoding	uc001igd.3	BC046483	UCSC_knowngene	1206	chr10	+	1094996	1096202	ATTTCCTCTACCTTTTGTGTGGAATTTAAAATACTGAACTTGTGAGATGAACCTGGTGGG	natural antisense	NM_004508	IDI1	isopentenyl-diphosphate Delta-isomerase 1	-	1085963	1095061	5.55017	3.46295
ASHGA5P028419	0.0251006	0.0693179	4.24857	up	noncoding	NR_044998	PSPC1	RefSeq	2438	chr13	-	20248891	20357159	AGATGAGTCCTTGATCTTGTTTCCTGATCTTGTTTCCATTTGACTGAATTCTGAACCTTC	exon sense-overlapping	NM_001042414	PSPC1	paraspeckle component 1	-	20277008	20357159	10.4508	8.36385
ASHGA5P022647	0.00183239	0.0157442	4.18915	up	noncoding	ENST00000560359	CTD-3110H11.2	GENCODE	709	chr15	+	50647524	50648567	CGCTGTGAAGGGGCGTCTGGGCATGGCTTTCCCAACCTAGTAACTGCAACTTTTAGCATC	natural antisense	NM_002041	GABPB1	GA-binding protein subunit beta-1 isoform gamma 1	-	50578076	50647605	5.95341	3.88675
ASHGA5P022647	0.00183239	0.0157442	4.18915	up	noncoding	ENST00000560359	CTD-3110H11.2	GENCODE	709	chr15	+	50647524	50648567	CGCTGTGAAGGGGCGTCTGGGCATGGCTTTCCCAACCTAGTAACTGCAACTTTTAGCATC	natural antisense	NM_005254	GABPB1	GA-binding protein subunit beta-1 isoform beta 1	-	50569388	50647605	5.95341	3.88675
ASHGA5P022647	0.00183239	0.0157442	4.18915	up	noncoding	ENST00000560359	CTD-3110H11.2	GENCODE	709	chr15	+	50647524	50648567	CGCTGTGAAGGGGCGTCTGGGCATGGCTTTCCCAACCTAGTAACTGCAACTTTTAGCATC	natural antisense	NM_016654	GABPB1	GA-binding protein subunit beta-1 isoform beta 2	-	50569388	50647605	5.95341	3.88675
ASHGA5P022647	0.00183239	0.0157442	4.18915	up	noncoding	ENST00000560359	CTD-3110H11.2	GENCODE	709	chr15	+	50647524	50648567	CGCTGTGAAGGGGCGTCTGGGCATGGCTTTCCCAACCTAGTAACTGCAACTTTTAGCATC	natural antisense	NM_016655	GABPB1	GA-binding protein subunit beta-1 isoform gamma 2	-	50578076	50647605	5.95341	3.88675
ASHGA5P022647	0.00183239	0.0157442	4.18915	up	noncoding	ENST00000560359	CTD-3110H11.2	GENCODE	709	chr15	+	50647524	50648567	CGCTGTGAAGGGGCGTCTGGGCATGGCTTTCCCAACCTAGTAACTGCAACTTTTAGCATC	natural antisense	NM_181427	GABPB1	GA-binding protein subunit beta-1 isoform gamma 2	-	50578076	50647605	5.95341	3.88675
ASHGA5P029304	0.00427444	0.0250093	4.17244	up	noncoding	ENST00000565058	RP11-747H7.3	GENCODE	3040	chr14	-	92223102	92226142	CCCTACTGCCTATTTCTAGGTGCTGTTCCCTTTAATAAGTATATTTTGAACATCATTTGT	intron sense-overlapping	ENST00000553676	CATSPERB	catsper channel auxiliary subunit beta [Source:HGNC Symbol;Acc:20500]	-	92189480	92247032	7.13611	5.07522
ASHGA5P029304	0.00427444	0.0250093	4.17244	up	noncoding	ENST00000565058	RP11-747H7.3	GENCODE	3040	chr14	-	92223102	92226142	CCCTACTGCCTATTTCTAGGTGCTGTTCCCTTTAATAAGTATATTTTGAACATCATTTGT	intron sense-overlapping	ENST00000554560	CATSPERB	catsper channel auxiliary subunit beta [Source:HGNC Symbol;Acc:20500]	-	92189401	92247051	7.13611	5.07522
ASHGA5P029304	0.00427444	0.0250093	4.17244	up	noncoding	ENST00000565058	RP11-747H7.3	GENCODE	3040	chr14	-	92223102	92226142	CCCTACTGCCTATTTCTAGGTGCTGTTCCCTTTAATAAGTATATTTTGAACATCATTTGT	intron sense-overlapping	ENST00000556661	CATSPERB	catsper channel auxiliary subunit beta [Source:HGNC Symbol;Acc:20500]	-	92189479	92247032	7.13611	5.07522
ASHGA5P031477	0.00320863	0.0212549	4.16456	up	noncoding	NR_024492	FLJ42627	RefSeq	7148	chr16	+	2688982	2696130	CACTTTTAAGCATCAATTGTGAAATAAAAAGCCCGAGCAAAAGCCCTCTTTGAGCGTGAA	intergenic							6.71088	4.65271
ASHGA5P051508	0.000104975	0.00353275	4.12243	up	noncoding	NR_024511	LINC00623	RefSeq	853	chr1	-	144300511	144340773	GGTTCTTCCGGTTCTTTGTGCCGCCTTCACCCAGTGAAGGAGCCTGTATCCACCCTGCCC	intronic antisense	ENST00000538264	AL592284.2	Uncharacterized protein [Source:UniProtKB/TrEMBL;Acc:F5H305]	+	144339737	144521058	5.89866	3.85516
ASHGA5P036428	0.00914322	0.0382357	4.0842	up	noncoding	TCONS_00026344	XLOC_012694	LincRNAs identified by Cabili et al	411	chr18	+	56327108	56327937	TTGTGAAGAGTCTGCTAAACTCCCTCTATCAGAAATCCCAGAGGACTGAGAACAGGTCAT	intergenic							8.80518	6.77513
ASHGA5P018089	0.0151729	0.0522048	4.08366	up	noncoding	ENST00000449289	GAS5	GENCODE	542	chr1	-	173833037	173837127	AACGTTTTTATCCATGGATGACTTGCTTGGGACTCAGAATTCATGATTGAAGAAATGCAG	bidirectional	NM_001122770	ZBTB37	zinc finger and BTB domain-containing protein 37 isoform a	+	173837492	173855774	9.98191	7.95205
ASHGA5P018089	0.0151729	0.0522048	4.08366	up	noncoding	ENST00000449289	GAS5	GENCODE	542	chr1	-	173833037	173837127	AACGTTTTTATCCATGGATGACTTGCTTGGGACTCAGAATTCATGATTGAAGAAATGCAG	bidirectional	NM_032522	ZBTB37	zinc finger and BTB domain-containing protein 37 isoform b	+	173837492	173842778	9.98191	7.95205
ASHGA5P019321	0.0184149	0.0582732	4.05861	up	noncoding	NR_038391	ANAPC16	RefSeq	3017	chr10	+	73975757	73995618	CCTCGTCGTGATGGCTCTGAGAGATTCCTCTGCGAATCTGTTTTTAGCTATCAAGTGGCA	exon sense-overlapping	NM_001242546	ANAPC16	anaphase-promoting complex subunit 16 isoform 1	+	73975757	73995618	6.29581	4.27483
ASHGA5P019321	0.0184149	0.0582732	4.05861	up	noncoding	NR_038391	ANAPC16	RefSeq	3017	chr10	+	73975757	73995618	CCTCGTCGTGATGGCTCTGAGAGATTCCTCTGCGAATCTGTTTTTAGCTATCAAGTGGCA	exon sense-overlapping	NM_001242547	ANAPC16	anaphase-promoting complex subunit 16 isoform 1	+	73975757	73995618	6.29581	4.27483
ASHGA5P019321	0.0184149	0.0582732	4.05861	up	noncoding	NR_038391	ANAPC16	RefSeq	3017	chr10	+	73975757	73995618	CCTCGTCGTGATGGCTCTGAGAGATTCCTCTGCGAATCTGTTTTTAGCTATCAAGTGGCA	exon sense-overlapping	NM_001242548	ANAPC16	anaphase-promoting complex subunit 16 isoform 2	+	73975757	73995618	6.29581	4.27483
ASHGA5P019321	0.0184149	0.0582732	4.05861	up	noncoding	NR_038391	ANAPC16	RefSeq	3017	chr10	+	73975757	73995618	CCTCGTCGTGATGGCTCTGAGAGATTCCTCTGCGAATCTGTTTTTAGCTATCAAGTGGCA	exon sense-overlapping	NM_173473	ANAPC16	anaphase-promoting complex subunit 16 isoform 1	+	73975757	73995618	6.29581	4.27483
ASHGA5P019321	0.0184149	0.0582732	4.05861	up	noncoding	NR_038391	ANAPC16	RefSeq	3017	chr10	+	73975757	73995618	CCTCGTCGTGATGGCTCTGAGAGATTCCTCTGCGAATCTGTTTTTAGCTATCAAGTGGCA	intronic antisense	NM_001198799	ASCC1	activating signal cointegrator 1 complex subunit 1 isoform a	-	73855789	73976199	6.29581	4.27483
ASHGA5P019321	0.0184149	0.0582732	4.05861	up	noncoding	NR_038391	ANAPC16	RefSeq	3017	chr10	+	73975757	73995618	CCTCGTCGTGATGGCTCTGAGAGATTCCTCTGCGAATCTGTTTTTAGCTATCAAGTGGCA	intronic antisense	NM_001198800	ASCC1	activating signal cointegrator 1 complex subunit 1 isoform b	-	73855789	73976199	6.29581	4.27483
ASHGA5P019321	0.0184149	0.0582732	4.05861	up	noncoding	NR_038391	ANAPC16	RefSeq	3017	chr10	+	73975757	73995618	CCTCGTCGTGATGGCTCTGAGAGATTCCTCTGCGAATCTGTTTTTAGCTATCAAGTGGCA	natural antisense	NM_001198798	ASCC1	activating signal cointegrator 1 complex subunit 1 isoform b	-	73855789	73975867	6.29581	4.27483
ASHGA5P019667	0.00280997	0.019689	4.05311	up	noncoding	ENST00000499326	CTD-3110H11.2	GENCODE	717	chr15	+	50647749	50648633	CACCTCAGAGGGGCGTCTGGGCATGGCTTTCCCAACCTAGTAACTGCAACTTTTAGCATC	bidirectional	NM_002041	GABPB1	GA-binding protein subunit beta-1 isoform gamma 1	-	50578076	50647605	5.85187	3.83284
ASHGA5P019667	0.00280997	0.019689	4.05311	up	noncoding	ENST00000499326	CTD-3110H11.2	GENCODE	717	chr15	+	50647749	50648633	CACCTCAGAGGGGCGTCTGGGCATGGCTTTCCCAACCTAGTAACTGCAACTTTTAGCATC	bidirectional	NM_005254	GABPB1	GA-binding protein subunit beta-1 isoform beta 1	-	50569388	50647605	5.85187	3.83284
ASHGA5P019667	0.00280997	0.019689	4.05311	up	noncoding	ENST00000499326	CTD-3110H11.2	GENCODE	717	chr15	+	50647749	50648633	CACCTCAGAGGGGCGTCTGGGCATGGCTTTCCCAACCTAGTAACTGCAACTTTTAGCATC	bidirectional	NM_016654	GABPB1	GA-binding protein subunit beta-1 isoform beta 2	-	50569388	50647605	5.85187	3.83284
ASHGA5P019667	0.00280997	0.019689	4.05311	up	noncoding	ENST00000499326	CTD-3110H11.2	GENCODE	717	chr15	+	50647749	50648633	CACCTCAGAGGGGCGTCTGGGCATGGCTTTCCCAACCTAGTAACTGCAACTTTTAGCATC	bidirectional	NM_016655	GABPB1	GA-binding protein subunit beta-1 isoform gamma 2	-	50578076	50647605	5.85187	3.83284
ASHGA5P019667	0.00280997	0.019689	4.05311	up	noncoding	ENST00000499326	CTD-3110H11.2	GENCODE	717	chr15	+	50647749	50648633	CACCTCAGAGGGGCGTCTGGGCATGGCTTTCCCAACCTAGTAACTGCAACTTTTAGCATC	bidirectional	NM_181427	GABPB1	GA-binding protein subunit beta-1 isoform gamma 2	-	50578076	50647605	5.85187	3.83284
ASHGA5P039061	0.0499605	0.102717	4.04407	up	noncoding	ENST00000560287	PBX2P1	GENCODE	2179	chr3	+	142895126	142897305	ATATCTACCTCGGAGGGAGTTTCTGCTACTTTAGGGAATTATTGACTGGGCTTTGGGGTT	intergenic							9.02619	7.01038
ASHGA5P018953	0.00602826	0.030243	4.03886	up	noncoding	ENST00000480246	AC002055.4	GENCODE	2987	chr22	+	51222289	51239737	CATTTAGGAGATGGCACCAAAAGCGAAGGAAGCTCCTGCTCATCCTAAAGCCGAAGCCAA	bidirectional	NM_001003789	RABL2B	rab-like protein 2B isoform 1	-	51205919	51222087	5.30786	3.29391
ASHGA5P018953	0.00602826	0.030243	4.03886	up	noncoding	ENST00000480246	AC002055.4	GENCODE	2987	chr22	+	51222289	51239737	CATTTAGGAGATGGCACCAAAAGCGAAGGAAGCTCCTGCTCATCCTAAAGCCGAAGCCAA	bidirectional	NM_001130919	RABL2B	rab-like protein 2B isoform 1	-	51205919	51222087	5.30786	3.29391
ASHGA5P018953	0.00602826	0.030243	4.03886	up	noncoding	ENST00000480246	AC002055.4	GENCODE	2987	chr22	+	51222289	51239737	CATTTAGGAGATGGCACCAAAAGCGAAGGAAGCTCCTGCTCATCCTAAAGCCGAAGCCAA	bidirectional	NM_001130920	RABL2B	rab-like protein 2B isoform 1	-	51205919	51222087	5.30786	3.29391
ASHGA5P018953	0.00602826	0.030243	4.03886	up	noncoding	ENST00000480246	AC002055.4	GENCODE	2987	chr22	+	51222289	51239737	CATTTAGGAGATGGCACCAAAAGCGAAGGAAGCTCCTGCTCATCCTAAAGCCGAAGCCAA	bidirectional	NM_001130921	RABL2B	rab-like protein 2B isoform 1	-	51205919	51222087	5.30786	3.29391
ASHGA5P018953	0.00602826	0.030243	4.03886	up	noncoding	ENST00000480246	AC002055.4	GENCODE	2987	chr22	+	51222289	51239737	CATTTAGGAGATGGCACCAAAAGCGAAGGAAGCTCCTGCTCATCCTAAAGCCGAAGCCAA	bidirectional	NM_001130922	RABL2B	rab-like protein 2B isoform 2	-	51205919	51222087	5.30786	3.29391
ASHGA5P018953	0.00602826	0.030243	4.03886	up	noncoding	ENST00000480246	AC002055.4	GENCODE	2987	chr22	+	51222289	51239737	CATTTAGGAGATGGCACCAAAAGCGAAGGAAGCTCCTGCTCATCCTAAAGCCGAAGCCAA	bidirectional	NM_001130923	RABL2B	rab-like protein 2B isoform 3	-	51205919	51222087	5.30786	3.29391
ASHGA5P018953	0.00602826	0.030243	4.03886	up	noncoding	ENST00000480246	AC002055.4	GENCODE	2987	chr22	+	51222289	51239737	CATTTAGGAGATGGCACCAAAAGCGAAGGAAGCTCCTGCTCATCCTAAAGCCGAAGCCAA	bidirectional	NM_007081	RABL2B	rab-like protein 2B isoform 2	-	51205919	51222087	5.30786	3.29391
ASHGA5P032616	0.00984047	0.0402926	4.03493	up	noncoding	ENST00000577698	RP11-147L13.2	GENCODE	1310	chr17	-	66242769	66244079	TGTTCACTCTCCTGGATCATGAATTCTCCAAATTTGTCCTTTGAACCCAGTGCCCATATC	natural antisense	ENST00000359904	AMZ2	archaelysin family metallopeptidase 2 [Source:HGNC Symbol;Acc:28041]	+	66243714	66253297	7.33919	5.32665
ASHGA5P032616	0.00984047	0.0402926	4.03493	up	noncoding	ENST00000577698	RP11-147L13.2	GENCODE	1310	chr17	-	66242769	66244079	TGTTCACTCTCCTGGATCATGAATTCTCCAAATTTGTCCTTTGAACCCAGTGCCCATATC	natural antisense	ENST00000580548	AMZ2	archaelysin family metallopeptidase 2 [Source:HGNC Symbol;Acc:28041]	+	66244070	66247319	7.33919	5.32665
ASHGA5P048142	3.16601e-06	0.000486563	4.02352	up	noncoding	ENST00000531708	AP001258.4	GENCODE	880	chr11	-	58902762	58910488	TCCCGGTTTCCCCAGTCCCGAGTATTGGAAAGCGAGAGCGAAAGCGAAAGCATCCTAGTC	natural antisense	NM_001142519	FAM111A	protein FAM111A	+	58910317	58922511	7.11698	5.10852
ASHGA5P048142	3.16601e-06	0.000486563	4.02352	up	noncoding	ENST00000531708	AP001258.4	GENCODE	880	chr11	-	58902762	58910488	TCCCGGTTTCCCCAGTCCCGAGTATTGGAAAGCGAGAGCGAAAGCGAAAGCATCCTAGTC	natural antisense	NM_001142520	FAM111A	protein FAM111A	+	58910317	58922511	7.11698	5.10852
ASHGA5P048142	3.16601e-06	0.000486563	4.02352	up	noncoding	ENST00000531708	AP001258.4	GENCODE	880	chr11	-	58902762	58910488	TCCCGGTTTCCCCAGTCCCGAGTATTGGAAAGCGAGAGCGAAAGCGAAAGCATCCTAGTC	natural antisense	NM_001142521	FAM111A	protein FAM111A	+	58910317	58922511	7.11698	5.10852
ASHGA5P027548	1.9482e-07	7.8106e-05	4.01622	up	noncoding	ENST00000552486	RP11-651L5.2	GENCODE	312	chr12	-	106639390	106640734	TGCAGGTCCAAATGAAATACCATCTATCTTTAGGTCCCTTGTCCTGTATTGGACCAGCCT	intron sense-overlapping	NM_006825	CKAP4	cytoskeleton-associated protein 4	-	106631658	106641713	4.67232	2.66648
ASHGA5P020722	0.0121218	0.0455204	3.99568	up	noncoding	ENST00000518964	RP11-622O11.2	GENCODE	585	chr8	-	126934614	126963493	CTTTCCACAGGTATCCCACTTCTAAGATGCCTGATCTGAAGGACAGTAAAACAACTGACC	intergenic							6.28572	4.28728
ASHGA5P041367	8.4464e-07	0.000229071	3.99104	up	noncoding	TCONS_00020666	XLOC_009969	LincRNAs identified by Cabili et al	4867	chr12	+	133692098	133698651	ATTTCACCCGAAGTTCTCCCTGTAGCCAAAGAAGCAAGTTCAGGTAAAAGAAGAAAGCTG	natural antisense	ENST00000397313	ZNF891	zinc finger protein 891 [Source:HGNC Symbol;Acc:38709]	-	133696869	133698504	5.27664	3.27988
ASHGA5P041367	8.4464e-07	0.000229071	3.99104	up	noncoding	TCONS_00020666	XLOC_009969	LincRNAs identified by Cabili et al	4867	chr12	+	133692098	133698651	ATTTCACCCGAAGTTCTCCCTGTAGCCAAAGAAGCAAGTTCAGGTAAAAGAAGAAAGCTG	natural antisense	ENST00000537226	ZNF891	zinc finger protein 891 [Source:HGNC Symbol;Acc:38709]	-	133694739	133707059	5.27664	3.27988
ASHGA5P033978	0.0167124	0.0552833	3.96311	up	noncoding	NR_027064	PLAC2	RefSeq	3693	chr19	-	5558177	5568005	CAGCTTGGAACTAGATACAGAAATGCTGTTTTGAGAGTGTACTGAATAAAAGATTACATG	intergenic							5.67964	3.693
ASHGA5P019179	0.024959	0.0691289	3.96062	up	noncoding	NR_003272	PSPC1	RefSeq	1769	chr13	-	20248891	20357159	AAGTACTGGAATCATACTTCCTTTCAGTCTTGCCACTTGCCTAGTGAGGCTTTTCCGAAC	exon sense-overlapping	NM_001042414	PSPC1	paraspeckle component 1	-	20277008	20357159	6.53669	4.55096
ASHGA5P019459	0.0194159	0.0598234	3.91442	up	noncoding	NR_045559	UXT	RefSeq	729	chrX	-	47511190	47518579	TACCTTCAACTGAGAAATGTCATTGAGCGACTCCAGCCCAGATACTTCACGCATCTATGT	exon sense-overlapping	NM_004182	UXT	protein UXT isoform 2	-	47511190	47518579	7.97359	6.00479
ASHGA5P019459	0.0194159	0.0598234	3.91442	up	noncoding	NR_045559	UXT	RefSeq	729	chrX	-	47511190	47518579	TACCTTCAACTGAGAAATGTCATTGAGCGACTCCAGCCCAGATACTTCACGCATCTATGT	exon sense-overlapping	NM_153477	UXT	protein UXT isoform 1	-	47511190	47518579	7.97359	6.00479
ASHGA5P043287	0.00347346	0.0222731	3.91373	up	noncoding	uc003vhn.1	BC040208	UCSC_knowngene	2280	chr7	-	115849285	115851565	CCTTGCCTCGAGAAATTTGGTAGCTAAAAATATCCAAAATTCATTTTAGCCAATACTTGC	natural antisense	NM_015641	TES	testin isoform 1	+	115850546	115898837	7.31152	5.34297
ASHGA5P052431	0.0349455	0.0828068	3.85972	up	noncoding	NR_033697	NDUFA2	RefSeq	846	chr5	-	140024947	140027370	GGCCCCGCAGGGACTTCATTGAGAAACGCTACGTGGAGCTGAAGAAGGCGAATCCCGACC	exon sense-overlapping	NM_001185012	NDUFA2	NADH dehydrogenase [ubiquinone] 1 alpha subcomplex subunit 2 isoform 2	-	140024947	140027370	7.45379	5.50529
ASHGA5P052431	0.0349455	0.0828068	3.85972	up	noncoding	NR_033697	NDUFA2	RefSeq	846	chr5	-	140024947	140027370	GGCCCCGCAGGGACTTCATTGAGAAACGCTACGTGGAGCTGAAGAAGGCGAATCCCGACC	exon sense-overlapping	NM_002488	NDUFA2	NADH dehydrogenase [ubiquinone] 1 alpha subcomplex subunit 2 isoform 1	-	140024947	140027370	7.45379	5.50529
ASHGA5P052431	0.0349455	0.0828068	3.85972	up	noncoding	NR_033697	NDUFA2	RefSeq	846	chr5	-	140024947	140027370	GGCCCCGCAGGGACTTCATTGAGAAACGCTACGTGGAGCTGAAGAAGGCGAATCCCGACC	natural antisense	NM_018502	TMCO6	transmembrane and coiled-coil domain-containing protein 6	+	140019011	140024989	7.45379	5.50529
ASHGA5P032701	0.000764373	0.0102595	3.82201	up	noncoding	ENST00000571724	RP11-1055B8.4	GENCODE	1561	chr17	-	79361929	79364056	CACGGCCACCGCCTCTTTTGTTAACAGGACAGTTGATCCATTAAATTAAAAATCATTCAA	intergenic							7.27231	5.33798
ASHGA5P031809	0.0268156	0.0719006	3.82109	up	noncoding	ENST00000570210	RP11-325K4.2	GENCODE	699	chr16	+	56974939	56975638	GAGTGATGGGTCTTCGTGGTTGAAACTAAAAGAAGAAATTTTCCTGTATAGTAAAAATGG	intron sense-overlapping	NM_001010989	HERPUD1	homocysteine-responsive endoplasmic reticulum-resident ubiquitin-like domain member 1 protein isoform 2	+	56965747	56977793	5.48437	3.55038
ASHGA5P031809	0.0268156	0.0719006	3.82109	up	noncoding	ENST00000570210	RP11-325K4.2	GENCODE	699	chr16	+	56974939	56975638	GAGTGATGGGTCTTCGTGGTTGAAACTAAAAGAAGAAATTTTCCTGTATAGTAAAAATGG	intron sense-overlapping	NM_001010990	HERPUD1	homocysteine-responsive endoplasmic reticulum-resident ubiquitin-like domain member 1 protein isoform 3	+	56965747	56977793	5.48437	3.55038
ASHGA5P031809	0.0268156	0.0719006	3.82109	up	noncoding	ENST00000570210	RP11-325K4.2	GENCODE	699	chr16	+	56974939	56975638	GAGTGATGGGTCTTCGTGGTTGAAACTAAAAGAAGAAATTTTCCTGTATAGTAAAAATGG	intron sense-overlapping	NM_014685	HERPUD1	homocysteine-responsive endoplasmic reticulum-resident ubiquitin-like domain member 1 protein isoform 1	+	56965747	56977793	5.48437	3.55038
ASHGA5P040780	0.0214411	0.0628645	3.82051	up	noncoding	ENST00000417986	RP11-277L2.2	GENCODE	324	chr1	+	149575481	149615903	AATGTGCCAGTTGATTCTGACAATTTCTCATGAACAGAAACACCTAGGAAGGGAGAACTG	intergenic							7.18649	5.25272
ASHGA5P057257	0.00558951	0.0292005	3.81772	up	noncoding	TCONS_00015022	XLOC_007096	LincRNAs identified by Cabili et al	287	chr8	-	61822076	61823092	AAACTGACAAAGCTTGTGAAATCCCAAACCGGATTGATGTGCTGTGACCCCTGTAGCATT	intergenic							8.03876	6.10605
ASHGA5P054037	0.0224196	0.0643249	3.8162	up	noncoding	ENST00000415215	JPX	GENCODE	475	chrX	+	73164201	73167265	TTGACGACTGGTATGTTAATTTTGTATATATTTTTATGAGAACAATGTTGGACATCATTT	intergenic							4.9919	3.05976
ASHGA5P037759	0.0155632	0.0529745	3.81457	up	noncoding	ENST00000564152	CTA-29F11.1	GENCODE	670	chr22	-	47157790	47158460	GCTTGAAGGGAAGAATGGTTTGAGCACCGAGGACAAGAATTAATTCCCCAGGCCTGGGTT	bidirectional	NM_014346	TBC1D22A	TBC1 domain family member 22A	+	47158517	47571342	6.46411	4.53259
ASHGA5P047893	0.00149244	0.014202	3.80316	up	noncoding	TCONS_00017441	XLOC_008033	LincRNAs identified by Cabili et al	2873	chrX	+	102213937	102219282	TTGTGTTAAGGGGTAGGGGAAGAGCAAGTGAAGGATGCAGATTAATTTCTATTTAGGAAT	intergenic							5.378	3.4508
ASHGA5P030903	3.10253e-05	0.00170611	3.79061	up	noncoding	ENST00000573953	RP11-473M20.7	GENCODE	1001	chr16	-	3107139	3108448	AATGACTCACCTTTGAAGAAGAAAGTTTCCCCTCGGATGTTGGCGATGGCGTCAAAATTG	natural antisense	NM_022468	MMP25	matrix metalloproteinase-25 preproprotein	+	3096681	3110724	5.15043	3.228
ASHGA5P032040	0.000197501	0.00494879	3.7543	up	noncoding	uc021tmw.1	DQ574721	UCSC_knowngene	1316	chr16	+	90237091	90238407	CGGCAGCCTCTTGGCCTCTAATTTGTTTATCTTTTGTGTATAAATCCCAAAATATTGAAT	intergenic							11.9969	10.0883
ASHGA5P032724	0.00230397	0.0177041	3.74179	up	noncoding	uc002kes.3	AF075112	UCSC_knowngene	304	chr17	-	80338986	80340511	CCTTTGTGCATATGTCTTGATCCACGCCTGATTTTAAAATTTCAGATAAAATCCTAGAAG	intergenic							5.62578	3.72205
ASHGA5P018758	0.0207106	0.0618808	3.74173	up	noncoding	ENST00000457352	NSUN5P2	pseudogene	1482	chr7	-	72419135	72425256	AGATGCCGACTGAGTGGGGGCATGCTTGGGAGGCGCAGGATGGTACTGGCACATCTAACA								5.58694	3.68323
ASHGA5P019388	0.030287	0.0769145	3.72746	up	noncoding	NR_033757	MINOS1	RefSeq	3911	chr1	+	19923470	19956315	CACAGCAACTTCTGTACTGGTTTTGGATTAGGAATTGTTTTCTCACTTACCTTCTTTAAA	exon sense-overlapping	NM_001032363	MINOS1	mitochondrial inner membrane organizing system protein 1 isoform a	+	19923470	19956315	6.49313	4.59494
ASHGA5P019388	0.030287	0.0769145	3.72746	up	noncoding	NR_033757	MINOS1	RefSeq	3911	chr1	+	19923470	19956315	CACAGCAACTTCTGTACTGGTTTTGGATTAGGAATTGTTTTCTCACTTACCTTCTTTAAA	exon sense-overlapping	NM_001204082	MINOS1	mitochondrial inner membrane organizing system protein 1 isoform b	+	19923470	19956315	6.49313	4.59494
ASHGA5P019388	0.030287	0.0769145	3.72746	up	noncoding	NR_033757	MINOS1	RefSeq	3911	chr1	+	19923470	19956315	CACAGCAACTTCTGTACTGGTTTTGGATTAGGAATTGTTTTCTCACTTACCTTCTTTAAA	exon sense-overlapping	NM_001204083	MINOS1	mitochondrial inner membrane organizing system protein 1 isoform c	+	19923470	19956315	6.49313	4.59494
ASHGA5P019388	0.030287	0.0769145	3.72746	up	noncoding	NR_033757	MINOS1	RefSeq	3911	chr1	+	19923470	19956315	CACAGCAACTTCTGTACTGGTTTTGGATTAGGAATTGTTTTCTCACTTACCTTCTTTAAA	exon sense-overlapping	NM_001204088	C1orf151-NBL1	C1orf151-NBL1 read-through protein isoform a	+	19923470	19984949	6.49313	4.59494
ASHGA5P019388	0.030287	0.0769145	3.72746	up	noncoding	NR_033757	MINOS1	RefSeq	3911	chr1	+	19923470	19956315	CACAGCAACTTCTGTACTGGTTTTGGATTAGGAATTGTTTTCTCACTTACCTTCTTTAAA	exon sense-overlapping	NM_001204089	C1orf151-NBL1	C1orf151-NBL1 read-through protein isoform b precursor	+	19923470	19984949	6.49313	4.59494
ASHGA5P026985	0.000154769	0.00436006	3.71883	up	noncoding	ENST00000539135	RP11-264F23.3	GENCODE	555	chr12	-	4357930	4385350	ATCCGTCACTTAGCCAGATACTCTGTTGCCATGCTTCTTTAAATAAAGCACATTTCTGGT	natural antisense	NM_001759	CCND2	G1/S-specific cyclin-D2	+	4382901	4414522	6.39048	4.49563
ASHGA5P046424	0.000352504	0.00670193	3.71791	up	noncoding	ENST00000430562	CD99P1	GENCODE	984	chrX	+	2527434	2556370	CCTTGTTCCCAGGGTCCACATTTAGTTTTATCTTTACTGCATTGCTTTTATGAAAAAGAA	intergenic							7.28002	5.38553
ASHGA5P056290	0.00153499	0.0143901	3.71724	up	noncoding	TCONS_00001811	XLOC_001195	LincRNAs identified by Cabili et al	972	chr1	-	212804779	212811198	TCTGGGGGCCTTGGTCAAGGGAGAAGCAGTGATGTTTTAGTATCCAGAAAGTGGAAATAA	intergenic							6.34122	4.44699
ASHGA5P050147	0.0164631	0.054807	3.71259	up	noncoding	ENST00000497576	CTC-260E6.2	pseudogene	441	chr19	+	20235852	20236293	CTCATCAAGGTGAACGGGCAGCCCCTGGAGATGACTGAGCCGCGCATGCTACAATACGAG								8.78723	6.89481
ASHGA5P039519	0.0285436	0.0744483	3.70593	up	noncoding	ENST00000563833	AF213884.2	GENCODE	479	chr4	-	103421997	103422476	GAGGGTCGGCATGGATCCAAGCATGCCAGATATAAAAATAAAGCTCATCTGTATATTCCA	bidirectional	NM_001165412	NFKB1	nuclear factor NF-kappa-B p105 subunit isoform 2	+	103422485	103538459	5.70728	3.81745
ASHGA5P039519	0.0285436	0.0744483	3.70593	up	noncoding	ENST00000563833	AF213884.2	GENCODE	479	chr4	-	103421997	103422476	GAGGGTCGGCATGGATCCAAGCATGCCAGATATAAAAATAAAGCTCATCTGTATATTCCA	bidirectional	NM_003998	NFKB1	nuclear factor NF-kappa-B p105 subunit isoform 1	+	103422485	103538459	5.70728	3.81745
ASHGA5P037817	0.00354276	0.022483	3.70368	up	noncoding	uc002zti.1	BC127858	UCSC_knowngene	283	chr22	+	21311690	21318877	ATGAAACACCCAAGTGTTAGGAACCAGAATAATCAGCCCTAATAGAGGGGAGGCTGATCA	intergenic							6.11077	4.22181
ASHGA5P055976	0.00264323	0.0189517	3.70316	up	noncoding	NR_038280	LOC100506963	RefSeq	1084	chr1	-	24086871	24104787	AGGTGCCAGAGTTCGTATATGACTCCAGTCCTGGCGCTGGATGCTGCTGCTGTTCCAGCT	natural antisense	NM_003198	TCEB3	transcription elongation factor B polypeptide 3	+	24069855	24088549	7.4739	5.58514
ASHGA5P016607	4.54292e-05	0.0022282	3.68548	up	noncoding	ENST00000432148	RP11-274B18.2	GENCODE	495	chr9	-	71158456	71161032	CTCTCTAGAGTGTTGCCACCTTTAAATGGCCCCTTACTCTCATAATCAGTGCTGAGTAGT	intergenic							5.63325	3.7514
ASHGA5P015273	0.000897285	0.0110338	3.68428	up	noncoding	ENST00000457926	AFG3L1P	GENCODE	2919	chr16	+	90039000	90063031	AATCTGTGCGTGTTATTCCTGCCCCTGGGACCTCTTCTGAAGGAGCCATGCTCACTGGTC	natural antisense	NM_145039	CENPBD1	CENPB DNA-binding domain-containing protein 1	-	90036182	90039240	8.60004	6.71866
ASHGA5P041070	0.027169	0.0724227	3.67495	up	noncoding	ENST00000514136	RP11-159F24.2	pseudogene	344	chr5	+	43348430	43348774	AATGCCACCATTAAAGTAGCTGGTGGAAATGTTGAACCTTTCTGGCCTGGCTTGTTTGCA								7.18905	5.31133
ASHGA5P029626	0.00743719	0.033753	3.67194	up	noncoding	ENST00000553944	ACTN1-AS1	GENCODE	475	chr14	+	69446757	69448270	ATCACCGCTTCTAAACTGTGGCTCTAAACCTAACACAGAGGGTAATGGTAGTGCTGTATC	bidirectional	NM_001102	ACTN1	alpha-actinin-1 isoform b	-	69340839	69446083	5.44105	3.5645
ASHGA5P029626	0.00743719	0.033753	3.67194	up	noncoding	ENST00000553944	ACTN1-AS1	GENCODE	475	chr14	+	69446757	69448270	ATCACCGCTTCTAAACTGTGGCTCTAAACCTAACACAGAGGGTAATGGTAGTGCTGTATC	bidirectional	NM_001130004	ACTN1	alpha-actinin-1 isoform a	-	69340839	69446083	5.44105	3.5645
ASHGA5P029626	0.00743719	0.033753	3.67194	up	noncoding	ENST00000553944	ACTN1-AS1	GENCODE	475	chr14	+	69446757	69448270	ATCACCGCTTCTAAACTGTGGCTCTAAACCTAACACAGAGGGTAATGGTAGTGCTGTATC	bidirectional	NM_001130005	ACTN1	alpha-actinin-1 isoform c	-	69340839	69446083	5.44105	3.5645
ASHGA5P038310	0.0101941	0.0411639	3.67014	up	noncoding	ENST00000488545	RP11-398A8.3	GENCODE	1561	chr3	-	72146878	72150108	CTCTTTCACAGCCTTACCTTTTCATATGGAGGAAGAAAAAACCCATTTCTATAAAGCTAT	intergenic							5.55183	3.67599
ASHGA5P026854	0.0261204	0.0707567	3.64672	up	noncoding	DQ218281		LincRNAs identified by Khalil et al	2960	chr7	-	26694390	26697338	CTAGTAGTCGCCACTTCTGAAAAGAGTTATCAATTCAAAAGGAATCTTTGTGTTTGCATA	intergenic							5.38771	3.5211
ASHGA5P023127	0.00733932	0.0336032	3.64448	up	noncoding	NR_073012	PRSS21	RefSeq	1044	chr16	+	2867163	2871723	GCTTTGAAACGCCTACTACACCCGTTACTTCGTATCGAATATCTATCTGAGCCCTCGCTA	exon sense-overlapping	NM_001270452	PRSS21	testisin isoform 4 preproprotein	+	2867163	2871723	7.21205	5.34633
ASHGA5P023127	0.00733932	0.0336032	3.64448	up	noncoding	NR_073012	PRSS21	RefSeq	1044	chr16	+	2867163	2871723	GCTTTGAAACGCCTACTACACCCGTTACTTCGTATCGAATATCTATCTGAGCCCTCGCTA	exon sense-overlapping	NM_006799	PRSS21	testisin isoform 1 preproprotein	+	2867163	2871723	7.21205	5.34633
ASHGA5P023127	0.00733932	0.0336032	3.64448	up	noncoding	NR_073012	PRSS21	RefSeq	1044	chr16	+	2867163	2871723	GCTTTGAAACGCCTACTACACCCGTTACTTCGTATCGAATATCTATCTGAGCCCTCGCTA	exon sense-overlapping	NM_144956	PRSS21	testisin isoform 2 preproprotein	+	2867163	2871723	7.21205	5.34633
ASHGA5P023127	0.00733932	0.0336032	3.64448	up	noncoding	NR_073012	PRSS21	RefSeq	1044	chr16	+	2867163	2871723	GCTTTGAAACGCCTACTACACCCGTTACTTCGTATCGAATATCTATCTGAGCCCTCGCTA	exon sense-overlapping	NM_144957	PRSS21	testisin isoform 3 preproprotein	+	2867163	2871723	7.21205	5.34633
ASHGA5P043049	0.00342347	0.0220292	3.63688	up	noncoding	ENST00000568457	RP4-647J21.1	GENCODE	1911	chr7	-	44998597	45000508	CCCCTCAAAAAATGCTTAGACTTAATTATTTTAATTATCCTCACATATACTCCTCCGGCT	intergenic							6.22045	4.35774
ASHGA5P019607	0.0163846	0.0547002	3.63687	up	noncoding	ENST00000495430	RP11-773D16.1	GENCODE	829	chr10	-	81564240	81586350	CTAAGGACAACAACCATCTTTCCTGTGAAAAATTCCCTCTCGTACTTTAGTTCTGTGGAT	intergenic							5.95524	4.09254
ASHGA5P019150	0.0137783	0.0489405	3.62801	up	noncoding	ENST00000483080	RP11-773D16.1	GENCODE	592	chr10	-	81564240	81586240	GGACAAGTATCAACCATCTTTCCTGTGAAAAATTCCCTCTCGTACTTTAGTTCTGTGGAT	intergenic							6.08783	4.22865
ASHGA5P035165	0.00570982	0.0294087	3.61231	up	noncoding	ENST00000421534	AC021188.4	GENCODE	740	chr2	-	96973000	96987469	ACTTCTACAGAAACAGAGTGGAATCTCCGAAATACCTTTGAGACCCTTTCGTGTCAGGTG	intergenic							5.46181	3.60889
ASHGA5P036818	0.00108379	0.0120189	3.60217	up	noncoding	TCONS_00026747	XLOC_012905	LincRNAs identified by Cabili et al	658	chr18	-	77437293	77439308	TGGATGATGAAGAATTCCCATGAACTCCTGGTTCCAACTGTAAGGACACACTACTCAGCT	intron sense-overlapping	ENST00000317008	AC068473.1	Uncharacterized protein [Source:UniProtKB/TrEMBL;Acc:E7ER84]	-	77398937	77439745	5.11564	3.26678
ASHGA5P037632	0.037338	0.0861062	3.60022	up	noncoding	ENST00000564772	CTA-445C9.15	GENCODE	3054	chr22	-	26917948	26921002	GCAGCATGCATCATTCATTCTGATTCCTTAATTTGCCATATGTGAAAACATGGTAATCTA	intergenic							5.59814	3.75005
ASHGA5P043211	0.000938945	0.0113297	3.5743	up	noncoding	TCONS_00018859	XLOC_008672	LincRNAs identified by Cabili et al	808	chr10	+	133772473	133773355	GTCAACCCTGGTCCTTAAGACAGTTCTAGTAAAATGGGATTGTATATATTTGTTCAACTA	exon sense-overlapping	ENST00000455566	PPP2R2D	protein phosphatase 2, regulatory subunit B, delta [Source:HGNC Symbol;Acc:23732]	+	133747954	133773331	7.31466	5.477
ASHGA5P017839	0.00142008	0.013829	3.56341	up	noncoding	ENST00000446290	RP11-274B18.2	GENCODE	338	chr9	-	71158456	71161505	GATGTGCAAGTGTTGCCACCTTTAAATGGCCCCTTACTCTCATAATCAGTGCTGAGTAGT	intergenic							5.68506	3.8518
ASHGA5P044006	0.0437134	0.0950439	3.5609	up	noncoding	uc003wgl.2	BC045757	UCSC_knowngene	1870	chr7	+	149535478	149537348	TTTCCAAGCTATTCTGTTCAGTCAGAGGCTTTCTTAGCCTTTAACGGGAGAAGAGAAATA	exon sense-overlapping	NM_001099220	ZNF862	zinc finger protein 862	+	149535508	149564568	6.28464	4.4524
ASHGA5P017372	4.66999e-05	0.00225455	3.55463	up	noncoding	ENST00000440778	RP4-717I23.3	GENCODE	596	chr1	-	93775309	93804091	CTCATGGTCCTGCACTCCATGGACTAAATTATGATGAAACTGAAACACAAAAAATTTAGA	intergenic							6.61262	4.78292
ASHGA5P045770	8.94024e-06	0.000877	3.54335	up	noncoding	ENST00000436054	RP11-63P12.6	GENCODE	2078	chr9	+	74920351	74958126	CAGGGGAAGTGTGACTGTAGCTTTAAATAGTTTAAATAGTCCTTCAAATACGGCAAATAA	intergenic							5.14017	3.31506
ASHGA5P038939	0.0189507	0.0590752	3.54028	up	noncoding	uc021xcj.1	AX747104	UCSC_knowngene	3171	chr3	+	111442569	111445740	GGCTTTTTACCCCTAGGAAATAATTGTCCAAGTATATATCTCGTCTTCTTTCTTGTAACT	intron sense-overlapping	NM_001185106	PLCXD2	PI-PLC X domain-containing protein 2 isoform a	+	111393522	111565294	6.45634	4.63248
ASHGA5P038939	0.0189507	0.0590752	3.54028	up	noncoding	uc021xcj.1	AX747104	UCSC_knowngene	3171	chr3	+	111442569	111445740	GGCTTTTTACCCCTAGGAAATAATTGTCCAAGTATATATCTCGTCTTCTTTCTTGTAACT	intron sense-overlapping	NM_153268	PLCXD2	PI-PLC X domain-containing protein 2 isoform b	+	111393522	111565294	6.45634	4.63248
ASHGA5P016613	0.00722013	0.0333718	3.53939	up	noncoding	ENST00000432193	TP53TG1	GENCODE	510	chr7	-	86954665	86974802	ACTTCTCGCCGCAGGTTTAACCACCAAGGACTCTGAGAGCTGGCAGGTCTGAGTAACCCT	bidirectional	NM_001143935	CROT	peroxisomal carnitine O-octanoyltransferase isoform 1	+	86974950	87029112	6.24551	4.42201
ASHGA5P016613	0.00722013	0.0333718	3.53939	up	noncoding	ENST00000432193	TP53TG1	GENCODE	510	chr7	-	86954665	86974802	ACTTCTCGCCGCAGGTTTAACCACCAAGGACTCTGAGAGCTGGCAGGTCTGAGTAACCCT	bidirectional	NM_001243745	CROT	peroxisomal carnitine O-octanoyltransferase isoform 3	+	86974950	86989425	6.24551	4.42201
ASHGA5P016613	0.00722013	0.0333718	3.53939	up	noncoding	ENST00000432193	TP53TG1	GENCODE	510	chr7	-	86954665	86974802	ACTTCTCGCCGCAGGTTTAACCACCAAGGACTCTGAGAGCTGGCAGGTCTGAGTAACCCT	bidirectional	NM_021151	CROT	peroxisomal carnitine O-octanoyltransferase isoform 2	+	86974950	87029112	6.24551	4.42201
ASHGA5P014267	0.00238346	0.0180147	3.53787	up	noncoding	NR_040722	RBM39	RefSeq	2954	chr20	-	34291530	34330258	TTACAAGAAGACTTGCCTAACGATATCTCACCTCTACTCCCATGAATTCACCTTTGATTC	exon sense-overlapping	NM_001242599	RBM39	RNA-binding protein 39 isoform c	-	34291530	34330258	7.11631	5.29343
ASHGA5P014267	0.00238346	0.0180147	3.53787	up	noncoding	NR_040722	RBM39	RefSeq	2954	chr20	-	34291530	34330258	TTACAAGAAGACTTGCCTAACGATATCTCACCTCTACTCCCATGAATTCACCTTTGATTC	exon sense-overlapping	NM_001242600	RBM39	RNA-binding protein 39 isoform d	-	34291530	34330258	7.11631	5.29343
ASHGA5P014267	0.00238346	0.0180147	3.53787	up	noncoding	NR_040722	RBM39	RefSeq	2954	chr20	-	34291530	34330258	TTACAAGAAGACTTGCCTAACGATATCTCACCTCTACTCCCATGAATTCACCTTTGATTC	exon sense-overlapping	NM_004902	RBM39	RNA-binding protein 39 isoform b	-	34291530	34330258	7.11631	5.29343
ASHGA5P014267	0.00238346	0.0180147	3.53787	up	noncoding	NR_040722	RBM39	RefSeq	2954	chr20	-	34291530	34330258	TTACAAGAAGACTTGCCTAACGATATCTCACCTCTACTCCCATGAATTCACCTTTGATTC	exon sense-overlapping	NM_184234	RBM39	RNA-binding protein 39 isoform a	-	34291530	34330258	7.11631	5.29343
ASHGA5P019074	0.0374161	0.0861244	3.53648	up	noncoding	NR_033758	MINOS1	RefSeq	3805	chr1	+	19923470	19956315	GCCACAGGAAGGGTACTGGTTTTGGATTAGGAATTGTTTTCTCACTTACCTTCTTTAAAA	exon sense-overlapping	NM_001032363	MINOS1	mitochondrial inner membrane organizing system protein 1 isoform a	+	19923470	19956315	6.72983	4.90752
ASHGA5P019074	0.0374161	0.0861244	3.53648	up	noncoding	NR_033758	MINOS1	RefSeq	3805	chr1	+	19923470	19956315	GCCACAGGAAGGGTACTGGTTTTGGATTAGGAATTGTTTTCTCACTTACCTTCTTTAAAA	exon sense-overlapping	NM_001204082	MINOS1	mitochondrial inner membrane organizing system protein 1 isoform b	+	19923470	19956315	6.72983	4.90752
ASHGA5P019074	0.0374161	0.0861244	3.53648	up	noncoding	NR_033758	MINOS1	RefSeq	3805	chr1	+	19923470	19956315	GCCACAGGAAGGGTACTGGTTTTGGATTAGGAATTGTTTTCTCACTTACCTTCTTTAAAA	exon sense-overlapping	NM_001204083	MINOS1	mitochondrial inner membrane organizing system protein 1 isoform c	+	19923470	19956315	6.72983	4.90752
ASHGA5P019074	0.0374161	0.0861244	3.53648	up	noncoding	NR_033758	MINOS1	RefSeq	3805	chr1	+	19923470	19956315	GCCACAGGAAGGGTACTGGTTTTGGATTAGGAATTGTTTTCTCACTTACCTTCTTTAAAA	exon sense-overlapping	NM_001204088	C1orf151-NBL1	C1orf151-NBL1 read-through protein isoform a	+	19923470	19984949	6.72983	4.90752
ASHGA5P019074	0.0374161	0.0861244	3.53648	up	noncoding	NR_033758	MINOS1	RefSeq	3805	chr1	+	19923470	19956315	GCCACAGGAAGGGTACTGGTTTTGGATTAGGAATTGTTTTCTCACTTACCTTCTTTAAAA	exon sense-overlapping	NM_001204089	C1orf151-NBL1	C1orf151-NBL1 read-through protein isoform b precursor	+	19923470	19984949	6.72983	4.90752
ASHGA5P017086	0.031406	0.078481	3.52669	up	noncoding	ENST00000437561	LINC00152	GENCODE	455	chr2	+	87769468	87820932	TTTTATTTGGAATAACTGGGAGATGAAACAGGAAGCTCTATGACACACTTGATCGAATAT	intergenic							5.94568	4.12737
ASHGA5P022872	0.0194482	0.0598544	3.52455	up	noncoding	ENST00000564371	CTD-2576F9.2	GENCODE	509	chr15	+	95399235	95400213	CGCCGTGGAGGCACGGCGGAAGGCCGAGGCTGACAAGCCCCGAAGGCTGGGGCGGCTCAA	intergenic							5.31292	3.49549
ASHGA5P055287	0.0064922	0.0314085	3.51202	up	noncoding	ENST00000536539	RP11-90D4.2	GENCODE	456	chr12	-	8536712	8543016	GACTGCGAGGACGGGCAGGACGCGCCGCGGTCGGCCAGGAAGGAGACCGGCACCCAGACA	intergenic							6.61347	4.80117
ASHGA5P055108	0.0297799	0.0761451	3.501	up	noncoding	ENST00000531772	RP11-788M5.3	GENCODE	429	chr11	+	101018880	101080322	TCATGGACCTAGGGGATATGTGACCTGTTTATTGAGTGATTGTGAAAGAGGAATGTGGGA	intergenic							5.40498	3.59721
ASHGA5P053405	0.0398006	0.0892946	3.48554	up	noncoding	ENST00000416952	GAS5	GENCODE	799	chr1	-	173834305	173837126	ATTGGTAAAGGAGATTAAATTTCTACAGGTATGGAGAGTCGGCTTGACTACACTGTGTGG	bidirectional	NM_001122770	ZBTB37	zinc finger and BTB domain-containing protein 37 isoform a	+	173837492	173855774	6.74442	4.94304
ASHGA5P053405	0.0398006	0.0892946	3.48554	up	noncoding	ENST00000416952	GAS5	GENCODE	799	chr1	-	173834305	173837126	ATTGGTAAAGGAGATTAAATTTCTACAGGTATGGAGAGTCGGCTTGACTACACTGTGTGG	bidirectional	NM_032522	ZBTB37	zinc finger and BTB domain-containing protein 37 isoform b	+	173837492	173842778	6.74442	4.94304
ASHGA5P042977	0.0137612	0.0489337	3.47961	up	noncoding	ENST00000580902	AC005154.6	GENCODE	926	chr7	-	30563590	30603614	AGAACCAAATGACAGCAATAGCCAAGTGTAATCATCAGTAACCCTGTGTTCTATCCACAG	intergenic							6.84963	5.0507
ASHGA5P050762	0.00071983	0.0099663	3.47603	up	noncoding	NR_034089	LOC100131564	RefSeq	4033	chr1	-	93775665	93811368	CATGGTCCTGCACTCCATGGACTAAATTGTAAGTATAATTACTACCAATGTACTCTATAA	bidirectional	NM_001938	DR1	protein Dr1	+	93811477	93828148	7.0327	5.23526
ASHGA5P032033	0.00105987	0.0118894	3.47189	up	noncoding	ENST00000565757	FAM157C	GENCODE	491	chr16	+	90168688	90172783	GTCCTGAAGACACCCGGTTCTCATGCTCTTCTCTGCAGCATCTGAATTGGGCATTCCTGG	intergenic							6.66194	4.86622
ASHGA5P025832	0.0410451	0.0910458	3.45117	up	noncoding	NR_038392	ANAPC16	RefSeq	3083	chr10	+	73975757	73995618	TAAAGCCGCTGAGATGGCTCTGAGAGATTCCTCTGCGAATCTGTTTTTAGCTATCAAGTG	exon sense-overlapping	NM_001242546	ANAPC16	anaphase-promoting complex subunit 16 isoform 1	+	73975757	73995618	5.71512	3.92804
ASHGA5P025832	0.0410451	0.0910458	3.45117	up	noncoding	NR_038392	ANAPC16	RefSeq	3083	chr10	+	73975757	73995618	TAAAGCCGCTGAGATGGCTCTGAGAGATTCCTCTGCGAATCTGTTTTTAGCTATCAAGTG	exon sense-overlapping	NM_001242547	ANAPC16	anaphase-promoting complex subunit 16 isoform 1	+	73975757	73995618	5.71512	3.92804
ASHGA5P025832	0.0410451	0.0910458	3.45117	up	noncoding	NR_038392	ANAPC16	RefSeq	3083	chr10	+	73975757	73995618	TAAAGCCGCTGAGATGGCTCTGAGAGATTCCTCTGCGAATCTGTTTTTAGCTATCAAGTG	exon sense-overlapping	NM_001242548	ANAPC16	anaphase-promoting complex subunit 16 isoform 2	+	73975757	73995618	5.71512	3.92804
ASHGA5P025832	0.0410451	0.0910458	3.45117	up	noncoding	NR_038392	ANAPC16	RefSeq	3083	chr10	+	73975757	73995618	TAAAGCCGCTGAGATGGCTCTGAGAGATTCCTCTGCGAATCTGTTTTTAGCTATCAAGTG	exon sense-overlapping	NM_173473	ANAPC16	anaphase-promoting complex subunit 16 isoform 1	+	73975757	73995618	5.71512	3.92804
ASHGA5P025832	0.0410451	0.0910458	3.45117	up	noncoding	NR_038392	ANAPC16	RefSeq	3083	chr10	+	73975757	73995618	TAAAGCCGCTGAGATGGCTCTGAGAGATTCCTCTGCGAATCTGTTTTTAGCTATCAAGTG	intronic antisense	NM_001198799	ASCC1	activating signal cointegrator 1 complex subunit 1 isoform a	-	73855789	73976199	5.71512	3.92804
ASHGA5P025832	0.0410451	0.0910458	3.45117	up	noncoding	NR_038392	ANAPC16	RefSeq	3083	chr10	+	73975757	73995618	TAAAGCCGCTGAGATGGCTCTGAGAGATTCCTCTGCGAATCTGTTTTTAGCTATCAAGTG	intronic antisense	NM_001198800	ASCC1	activating signal cointegrator 1 complex subunit 1 isoform b	-	73855789	73976199	5.71512	3.92804
ASHGA5P025832	0.0410451	0.0910458	3.45117	up	noncoding	NR_038392	ANAPC16	RefSeq	3083	chr10	+	73975757	73995618	TAAAGCCGCTGAGATGGCTCTGAGAGATTCCTCTGCGAATCTGTTTTTAGCTATCAAGTG	natural antisense	NM_001198798	ASCC1	activating signal cointegrator 1 complex subunit 1 isoform b	-	73855789	73975867	5.71512	3.92804
ASHGA5P055694	0.00552936	0.0290354	3.44516	up	noncoding	NR_033878	LOC387895	RefSeq	621	chr12	-	127215246	127256808	CCCCTTTATAGCTGGTATGTTTTCTTCTTATGGACAATGAGAAACATGTAATAAACTGTG	intergenic							6.28936	4.50479
ASHGA5P023242	0.00592133	0.029914	3.43241	up	noncoding	ENST00000575606	RP11-874J12.2	GENCODE	344	chr18	+	3594091	3597370	CTGGCAACAGATGGATATCTGAGAGCCAGCGAACTTTCTTTACCTCCTAGTATCATTTCA	intronic antisense	NM_001003809	DLGAP1	disks large-associated protein 1 isoform 2	-	3496029	3845358	5.68263	3.90341
ASHGA5P023242	0.00592133	0.029914	3.43241	up	noncoding	ENST00000575606	RP11-874J12.2	GENCODE	344	chr18	+	3594091	3597370	CTGGCAACAGATGGATATCTGAGAGCCAGCGAACTTTCTTTACCTCCTAGTATCATTTCA	intronic antisense	NM_001242761	DLGAP1	disks large-associated protein 1 isoform 3	-	3502142	4455266	5.68263	3.90341
ASHGA5P023242	0.00592133	0.029914	3.43241	up	noncoding	ENST00000575606	RP11-874J12.2	GENCODE	344	chr18	+	3594091	3597370	CTGGCAACAGATGGATATCTGAGAGCCAGCGAACTTTCTTTACCTCCTAGTATCATTTCA	intronic antisense	NM_001242762	DLGAP1	disks large-associated protein 1 isoform 4	-	3496029	3874767	5.68263	3.90341
ASHGA5P023242	0.00592133	0.029914	3.43241	up	noncoding	ENST00000575606	RP11-874J12.2	GENCODE	344	chr18	+	3594091	3597370	CTGGCAACAGATGGATATCTGAGAGCCAGCGAACTTTCTTTACCTCCTAGTATCATTTCA	intronic antisense	NM_001242763	DLGAP1	disks large-associated protein 1 isoform 5	-	3496029	3874767	5.68263	3.90341
ASHGA5P023242	0.00592133	0.029914	3.43241	up	noncoding	ENST00000575606	RP11-874J12.2	GENCODE	344	chr18	+	3594091	3597370	CTGGCAACAGATGGATATCTGAGAGCCAGCGAACTTTCTTTACCTCCTAGTATCATTTCA	intronic antisense	NM_001242764	DLGAP1	disks large-associated protein 1 isoform 6	-	3496029	3874253	5.68263	3.90341
ASHGA5P023242	0.00592133	0.029914	3.43241	up	noncoding	ENST00000575606	RP11-874J12.2	GENCODE	344	chr18	+	3594091	3597370	CTGGCAACAGATGGATATCTGAGAGCCAGCGAACTTTCTTTACCTCCTAGTATCATTTCA	intronic antisense	NM_001242765	DLGAP1	disks large-associated protein 1 isoform 7	-	3502142	3845358	5.68263	3.90341
ASHGA5P023242	0.00592133	0.029914	3.43241	up	noncoding	ENST00000575606	RP11-874J12.2	GENCODE	344	chr18	+	3594091	3597370	CTGGCAACAGATGGATATCTGAGAGCCAGCGAACTTTCTTTACCTCCTAGTATCATTTCA	intronic antisense	NM_001242766	DLGAP1	disks large-associated protein 1 isoform 8	-	3496029	3845358	5.68263	3.90341
ASHGA5P023242	0.00592133	0.029914	3.43241	up	noncoding	ENST00000575606	RP11-874J12.2	GENCODE	344	chr18	+	3594091	3597370	CTGGCAACAGATGGATATCTGAGAGCCAGCGAACTTTCTTTACCTCCTAGTATCATTTCA	intronic antisense	NM_004746	DLGAP1	disks large-associated protein 1 isoform 1	-	3496029	4455266	5.68263	3.90341
ASHGA5P013205	0.0244012	0.0680179	3.43079	up	noncoding	NR_024091	ZFP91-CNTF	RefSeq	3544	chr11	+	58346586	58393205	AAGGGATGTCAAAGTCATACTGCAGTGGGACGGAACGGAGCATTCACCGCTGACCCCTCA	exon sense-overlapping	NM_000614	CNTF	ciliary neurotrophic factor	+	58390145	58393205	5.8042	4.02566
ASHGA5P013205	0.0244012	0.0680179	3.43079	up	noncoding	NR_024091	ZFP91-CNTF	RefSeq	3544	chr11	+	58346586	58393205	AAGGGATGTCAAAGTCATACTGCAGTGGGACGGAACGGAGCATTCACCGCTGACCCCTCA	exon sense-overlapping	NM_001197051	ZFP91	E3 ubiquitin-protein ligase ZFP91 isoform 2	+	58346586	58389023	5.8042	4.02566
ASHGA5P013205	0.0244012	0.0680179	3.43079	up	noncoding	NR_024091	ZFP91-CNTF	RefSeq	3544	chr11	+	58346586	58393205	AAGGGATGTCAAAGTCATACTGCAGTGGGACGGAACGGAGCATTCACCGCTGACCCCTCA	exon sense-overlapping	NM_053023	ZFP91	E3 ubiquitin-protein ligase ZFP91 isoform 1	+	58346586	58389023	5.8042	4.02566
ASHGA5P043741	0.000730672	0.010041	3.40935	up	noncoding	ENST00000404291	STAG3L1	GENCODE	496	chr7	+	74995622	75024657	AGCCCAGGTGCCCAGAGGACTTTCTTCCAGCTTCTGCTGTCCTTCTTTGTGGAGAGCAAG	exon sense-overlapping	ENST00000450434	TRIM73	tripartite motif containing 73 [Source:HGNC Symbol;Acc:18162]	+	75024336	75034896	7.19132	5.42182
ASHGA5P043034	0.0115767	0.0442041	3.40874	up	noncoding	ENST00000427076	POLR2J4	GENCODE	6466	chr7	-	43980493	44058748	ATGGTGCTGAAAAGAACACCTTTACCTGTAATAAGCCTGCCTGAGTTAATAAAAATATCA	intronic antisense	NM_175064	SPDYE1	putative WBSCR19-like protein 6	+	44040488	44049723	6.3899	4.62066
ASHGA5P043034	0.0115767	0.0442041	3.40874	up	noncoding	ENST00000427076	POLR2J4	GENCODE	6466	chr7	-	43980493	44058748	ATGGTGCTGAAAAGAACACCTTTACCTGTAATAAGCCTGCCTGAGTTAATAAAAATATCA	natural antisense	NM_015983	UBE2D4	ubiquitin-conjugating enzyme E2 D4	+	43966034	43995735	6.3899	4.62066
ASHGA5P019385	0.0373148	0.0860845	3.40179	up	noncoding	ENST00000481220	SNHG12	GENCODE	751	chr1	-	28905052	28908365	GGGCTGACAGATGAAGACTCTTAAGATGACAGAAGGTGATTTTTCTGGTGATCGAGGACT	natural antisense	NM_017846	TRNAU1AP	tRNA selenocysteine 1-associated protein 1	+	28879528	28905057	5.82479	4.05849
ASHGA5P047928	0.00476788	0.0265007	3.38544	up	noncoding	BI752281		LincRNAs identified by Khalil et al	809	chr21	-	33617703	33618514	GCAGAGAATTTTGACTCTTCGTCCCTCTGTTGGACATCTAAGTAACATTAAAGGGCTCAG	intergenic							4.33589	2.57655
ASHGA5P033327	0.00903036	0.0379572	3.37724	up	noncoding	uc001hwk.4	BC016972	UCSC_knowngene	888	chr1	-	235093089	235099746	CCTGGGGGAATGAATCTTTCAGAGCCAAACTAATGCTATGCATGCAGCTTATGATTTTTT	intergenic							5.07207	3.31623
ASHGA5P050886	0.0122853	0.0459332	3.37667	up	noncoding	ENST00000426962	AC093642.3	GENCODE	430	chr2	+	242913428	242914075	GGGAGGGGGCATTTCAACCTGTTAATTTCTCAAATTATGTAGTCATTCAAAAAGAAATAG	intergenic							5.72723	3.97163
ASHGA5P031094	0.0118848	0.044914	3.37665	up	noncoding	TCONS_00017504	XLOC_008152	LincRNAs identified by Cabili et al	2622	chrX	-	46458742	46461839	AAGTACAGCTGAAAAGATCACGAAAACCTTGGAGCCTTCGAGGAAAGAGAAGGGTGACTT	exon sense-overlapping	NM_001257291	SLC9A7	sodium/hydrogen exchanger 7 isoform 1 precursor	-	46458685	46618607	4.76661	3.01102
ASHGA5P031094	0.0118848	0.044914	3.37665	up	noncoding	TCONS_00017504	XLOC_008152	LincRNAs identified by Cabili et al	2622	chrX	-	46458742	46461839	AAGTACAGCTGAAAAGATCACGAAAACCTTGGAGCCTTCGAGGAAAGAGAAGGGTGACTT	exon sense-overlapping	NM_032591	SLC9A7	sodium/hydrogen exchanger 7 isoform 2 precursor	-	46458685	46618607	4.76661	3.01102
ASHGA5P044022	0.00182258	0.0157181	3.36674	up	noncoding	ENST00000462083	RP13-452N2.1	GENCODE	2139	chr7	+	151503819	151507906	CCTAAAAGCAGACATTAAACAATAAAATGCCACCACATACCTTGCCCACAAAATAAAATC	intronic antisense	NM_001040633	PRKAG2	5'-AMP-activated protein kinase subunit gamma-2 isoform c	-	151253200	151511957	6.54791	4.79656
ASHGA5P044022	0.00182258	0.0157181	3.36674	up	noncoding	ENST00000462083	RP13-452N2.1	GENCODE	2139	chr7	+	151503819	151507906	CCTAAAAGCAGACATTAAACAATAAAATGCCACCACATACCTTGCCCACAAAATAAAATC	intronic antisense	NM_016203	PRKAG2	5'-AMP-activated protein kinase subunit gamma-2 isoform a	-	151253200	151574316	6.54791	4.79656
ASHGA5P022879	0.00181792	0.0157181	3.36403	up	noncoding	ENST00000564485	RP11-77H9.8	GENCODE	427	chr16	+	9056562	9060847	CCCAACCTGGAAGCACCTTGAGGAAGAAATTGTCTTGTCTACAGCTCTATCCTCAGTACA	intronic antisense	NM_003470	USP7	ubiquitin carboxyl-terminal hydrolase 7	-	8985950	9057341	4.80313	3.05294
ASHGA5P022191	0.0300809	0.0766233	3.35936	up	noncoding	ENST00000551898	RP11-493L12.2	GENCODE	359	chr12	-	47599683	47609983	CAGGGAAATGCAGGCTGAGGAATTACCAAGGAGGCAGGAGGTGGAGCAAAACACACCAAG	intronic antisense	ENST00000546455	PCED1B	PC-esterase domain containing 1B [Source:HGNC Symbol;Acc:28255]	+	47473385	47630443	6.53083	4.78264
ASHGA5P006965	1.75394e-05	0.00128358	3.35096	up	noncoding	ENST00000326333	KRT17P2	GENCODE	1174	chr17	+	18330174	18333941	ATGACAATGCCCATCTGGCTGCTGCTGACTTCCGCACCAAAGTCCTGGCAAAATGAAGGC	intergenic							6.51307	4.7685
ASHGA5P042441	0.00142437	0.0138495	3.34899	up	noncoding	ENST00000450671	RP3-475N16.1	GENCODE	679	chr6	+	42908101	42911708	AACACAAACAGCAGAATGGCTCCATCTCTGTTGAAGACTTCCATCAACTAGAACCACGAG	intergenic							5.38499	3.64127
ASHGA5P053769	0.00385778	0.0235736	3.34879	up	noncoding	NR_024532	ALG2	RefSeq	2993	chr9	-	101978706	101984246	TGAATATATCATGCCCCTATTAAAACTTGTACATGGCTCCCCATTGGTTTTTGGAGAAAA	exon sense-overlapping	NM_033087	ALG2	alpha-1,3/1,6-mannosyltransferase ALG2	-	101978706	101984246	6.88062	5.13698
ASHGA5P027814	0.0340255	0.0816842	3.34735	up	noncoding	NR_036466	LOC100499405	RefSeq	2469	chr12	+	9392598	9395645	GGTCATACGCTCAGGGAATGTTTATTATTGGAACAATTTAACCTACCAGCTTGTTATTTT	intergenic							5.51038	3.76736
ASHGA5P017603	0.0334264	0.0809202	3.34169	up	noncoding	ENST00000443623	AC058791.2	GENCODE	453	chr7	-	130628926	130668868	CGCAGATGAGACTGAGTGTACTTGGTCTGGTATTTGTGGCATAACTTACGGAACACATAA	intergenic							6.61056	4.86998
ASHGA5P043394	0.0388515	0.0882043	3.34065	up	noncoding	ENST00000517565	RP11-61L23.2	GENCODE	2498	chr7	-	143509063	143533301	AGGGCATATTTTGGGGAGTGATGGGATTATGCACACCCTTCAGGTGTCAAGATAAAGAGA	intergenic							5.15295	3.41282
ASHGA5P053376	0.00994052	0.0405044	3.33157	up	noncoding	uc010pmp.1	BC136808	UCSC_knowngene	1659	chr1	-	173387087	173430501	TTTGGATAATTTCCGTCCTTGGCGGTGTGTTCTATAGCATAGGTATGAAGTGGGTGCTCT	intergenic							10.9803	9.24409
ASHGA5P033478	0.03273	0.079969	3.32471	up	noncoding	ENST00000579647	CBX3P2	GENCODE	1429	chr18	-	2652168	2655394	GGAAAAGCTTTCTGTAGCTGCTTCATTTACCAGAAAAGAATATTTGGTTCCATGGTATAT	bidirectional	NM_015295	SMCHD1	structural maintenance of chromosomes flexible hinge domain-containing protein 1	+	2655885	2805015	5.25777	3.52454
ASHGA5P046341	2.1e-10	9.68e-07	3.32349	up	noncoding	ENST00000457876	AC004383.4	GENCODE	646	chrX	-	133678455	133679768	AAAGTCCTGGGCACTGTTGCTCATGAGTGCTGCACAACTGTCGCCCTCTAAAGCCACCTC	intergenic							4.574	2.8413
ASHGA5P037208	4.59765e-05	0.00223131	3.31928	up	noncoding	TCONS_00025773	XLOC_012582	LincRNAs identified by Cabili et al	857	chr17	-	76613497	76614757	GGATTGCAAGACAGTAGTTCCCTGTCCTTTAGGTCTTCTCCAGAAATACCTTAAAATAGC	intergenic							6.21489	4.48402
ASHGA5P058408	0.00432264	0.0251477	3.31524	up	noncoding	uc002tke.1	WASH2P	UCSC_knowngene	1581	chr2	+	114351242	114354155	ATATCACTGGGCCCACCCTGCACCAGGGAGGATGGAAGCAGGATCTCCCAGCAGGTAGAG	intergenic							6.56166	4.83255
ASHGA5P051944	1.54539e-05	0.00119748	3.31508	up	noncoding	NR_024031	DANCR	RefSeq	855	chr4	+	53578620	53580305	CCTCTCTGGTTTGTGCGCCCGTCGCAGGTCGCAGGCCTCTTTGTCAGCTGGAGTTGCGCG	intergenic							5.25531	3.52626
ASHGA5P017072	0.000549927	0.00856567	3.31496	up	noncoding	ENST00000437346	AC009501.4	GENCODE	794	chr2	-	63272195	63275775	GCGCAGCGAGGGCCCCCTCTGGGATGGTGTAAACTTATTCAGCTTCAAATGCAGCCCAGT	natural antisense	NM_001142614	EHBP1	EH domain-binding protein 1 isoform 2	+	62934031	63273621	4.72689	2.9979
ASHGA5P017072	0.000549927	0.00856567	3.31496	up	noncoding	ENST00000437346	AC009501.4	GENCODE	794	chr2	-	63272195	63275775	GCGCAGCGAGGGCCCCCTCTGGGATGGTGTAAACTTATTCAGCTTCAAATGCAGCCCAGT	natural antisense	NM_001142615	EHBP1	EH domain-binding protein 1 isoform 3	+	62900985	63273621	4.72689	2.9979
ASHGA5P017072	0.000549927	0.00856567	3.31496	up	noncoding	ENST00000437346	AC009501.4	GENCODE	794	chr2	-	63272195	63275775	GCGCAGCGAGGGCCCCCTCTGGGATGGTGTAAACTTATTCAGCTTCAAATGCAGCCCAGT	natural antisense	NM_001142616	EHBP1	EH domain-binding protein 1 isoform 3	+	62933000	63273621	4.72689	2.9979
ASHGA5P017072	0.000549927	0.00856567	3.31496	up	noncoding	ENST00000437346	AC009501.4	GENCODE	794	chr2	-	63272195	63275775	GCGCAGCGAGGGCCCCCTCTGGGATGGTGTAAACTTATTCAGCTTCAAATGCAGCCCAGT	natural antisense	NM_015252	EHBP1	EH domain-binding protein 1 isoform 1	+	62933000	63273621	4.72689	2.9979
ASHGA5P020811	0.0371502	0.0858982	3.31344	up	noncoding	NR_024084	SAP30L	RefSeq	6287	chr5	+	153825516	153840613	TTAGAGGCAGGTTGATCTGTTCCAGCTGCAGGTGAACACCCTACGACGTTATAAACGACA	exon sense-overlapping	NM_001131062	SAP30L	histone deacetylase complex subunit SAP30L isoform 2	+	153825516	153840613	6.00186	4.27354
ASHGA5P020811	0.0371502	0.0858982	3.31344	up	noncoding	NR_024084	SAP30L	RefSeq	6287	chr5	+	153825516	153840613	TTAGAGGCAGGTTGATCTGTTCCAGCTGCAGGTGAACACCCTACGACGTTATAAACGACA	exon sense-overlapping	NM_001131063	SAP30L	histone deacetylase complex subunit SAP30L isoform 3	+	153825516	153840613	6.00186	4.27354
ASHGA5P020811	0.0371502	0.0858982	3.31344	up	noncoding	NR_024084	SAP30L	RefSeq	6287	chr5	+	153825516	153840613	TTAGAGGCAGGTTGATCTGTTCCAGCTGCAGGTGAACACCCTACGACGTTATAAACGACA	exon sense-overlapping	NM_024632	SAP30L	histone deacetylase complex subunit SAP30L isoform 1	+	153825516	153840613	6.00186	4.27354
ASHGA5P047609	0.0264139	0.0712379	3.30777	up	noncoding	BX098395		LincRNAs identified by Khalil et al	341	chr1	+	33430528	33430868	CACTTCCAGTAAATGATGGTTCAGTTACATTATTTATAAAAAGCAGGCAGGGGTTGATCA	intergenic							6.70341	4.97755
ASHGA5P027589	0.013767	0.0489337	3.30267	up	noncoding	uc001tsx.2	C12orf47	UCSC_knowngene	1810	chr12	-	112277573	112280706	GGTAATAAACAGGAAAAAGCCCGAGTCTGATGCTAAGAAGAACATAAACAGGATGCTGAG	natural antisense	NM_003668	MAPKAPK5	MAP kinase-activated protein kinase 5 isoform 1	+	112280278	112331228	6.02492	4.30129
ASHGA5P027589	0.013767	0.0489337	3.30267	up	noncoding	uc001tsx.2	C12orf47	UCSC_knowngene	1810	chr12	-	112277573	112280706	GGTAATAAACAGGAAAAAGCCCGAGTCTGATGCTAAGAAGAACATAAACAGGATGCTGAG	natural antisense	NM_139078	MAPKAPK5	MAP kinase-activated protein kinase 5 isoform 2	+	112280278	112331228	6.02492	4.30129
ASHGA5P032900	0.0291566	0.0753724	3.29738	up	noncoding	TCONS_00016076	XLOC_007467	LincRNAs identified by Cabili et al	216	chr9	+	97075821	97076871	TATGAATGCTCACACAGAAGCTCTCATTCCTGAGGAATGCAGGGAAAAGCAGAAGATGGA	intergenic							5.2412	3.51988
ASHGA5P042162	0.0238596	0.0669536	3.29454	up	noncoding	NR_024277	AGPAT4-IT1	RefSeq	1869	chr6	-	161581163	161583014	TTTTCCTCTCAGCATCAGAGAAGGCAGAAAGCAAGAGAAAGGAATGCAATGTGAGCAAGG	intron sense-overlapping	NM_020133	AGPAT4	1-acyl-sn-glycerol-3-phosphate acyltransferase delta	-	161551056	161695107	5.83054	4.11046
ASHGA5P028211	0.0333177	0.0807843	3.29187	up	noncoding	ENST00000501008	RP11-796E2.4	GENCODE	1898	chr12	+	92539348	92561336	GAGGAGTAGGGGGATATCTTTTAAAAGTTTAATTGCAAAATAAGTAGGTTAGTAAGGCCA	natural antisense	NM_001731	BTG1	protein BTG1	-	92534053	92539673	6.08215	4.36324
ASHGA5P033295	0.0266763	0.0716731	3.2895	up	noncoding	ENST00000451795	RP5-827C21.4	GENCODE	575	chr1	-	234508552	234509339	CAGCAAGGTATTTTTAAAAGGGATGAAGAGAGTTGCTTCAAATGTTTTGAGACGTTGTTA	natural antisense	NM_001206641	C1orf31	uncharacterized protein C1orf31 isoform 2	+	234509213	234519795	5.54049	3.82263
ASHGA5P019601	0.00449062	0.0256874	3.28833	up	noncoding	NR_048556	TSN	RefSeq	3314	chr2	+	122513120	122525428	CATCCGAGAGTTCCAAAGAGGTGTTTGAAAGCTCGAGAACATTTTGGTACAGTAAAAACA	exon sense-overlapping	NM_001261401	TSN	translin isoform 2	+	122513120	122525428	5.92248	4.20512
ASHGA5P019601	0.00449062	0.0256874	3.28833	up	noncoding	NR_048556	TSN	RefSeq	3314	chr2	+	122513120	122525428	CATCCGAGAGTTCCAAAGAGGTGTTTGAAAGCTCGAGAACATTTTGGTACAGTAAAAACA	exon sense-overlapping	NM_004622	TSN	translin isoform 1	+	122513120	122525428	5.92248	4.20512
ASHGA5P049942	0.00692188	0.0327316	3.28097	up	noncoding	uc002kmd.2	AX721193	UCSC_knowngene	402	chr18	+	3473959	3478974	CATACCTGAGGATTATGTGGTTTGTAAACTTGGCACTTAGAAGAACCAATAAAATCATGT	intergenic							6.96641	5.25229
ASHGA5P043694	0.028808	0.0749124	3.26842	up	noncoding	uc003ttf.3	BC053669	UCSC_knowngene	2761	chr7	+	64141510	64147264	ACGGGTTTCTGTTCCAACTGGTTGATCAACTTCTTGAGTCAACAAGTCCCAAAACCATGT	intron sense-overlapping	NM_001013746	ZNF107	zinc finger protein 107	+	64126510	64171401	5.61098	3.90239
ASHGA5P043694	0.028808	0.0749124	3.26842	up	noncoding	uc003ttf.3	BC053669	UCSC_knowngene	2761	chr7	+	64141510	64147264	ACGGGTTTCTGTTCCAACTGGTTGATCAACTTCTTGAGTCAACAAGTCCCAAAACCATGT	intron sense-overlapping	NM_016220	ZNF107	zinc finger protein 107	+	64126510	64171401	5.61098	3.90239
ASHGA5P028645	0.0282177	0.0740231	3.26454	up	noncoding	ENST00000432229	FARP1-AS1	GENCODE	323	chr13	-	99087658	99088094	CCCTGCACAGTATTCAAAGGTGTCTTTTGAGCAAAAACAGTGCTATTTCTCTATAATAAA	natural antisense	NM_005766	FARP1	FERM, RhoGEF and pleckstrin domain-containing protein 1 isoform 1	+	98795433	99102023	6.0889	4.38202
ASHGA5P041832	0.00232598	0.0177766	3.26384	up	noncoding	ENST00000564680	TREML3P	GENCODE	978	chr6	-	41176450	41185685	CTCAGCAGGTCTCCAGGATGCCTCACATTTTCCCTGTTTGTTAGTGGTCTACCCGAGAGT	intergenic							6.2406	4.53403
ASHGA5P033837	0.0184304	0.0583009	3.26055	up	noncoding	TCONS_00003974	XLOC_001788	LincRNAs identified by Cabili et al	2784	chr2	+	192559981	192563100	CCTAAACACACAGAGGAGAATTACTTCAAGTATTTTTAAAACACAGTCACTTGTCTATGC	intergenic							6.46994	4.76483
ASHGA5P015043	1.863e-08	1.5617e-05	3.2578	up	noncoding	NR_045772	ATF2	RefSeq	4205	chr2	-	175936977	176032934	GGAAACTGAAGGACTCTAATTATCCACAGACCAGAGTGAAGTCACCCTGCTGAGAAATGA	exon sense-overlapping	NM_001256090	ATF2	cyclic AMP-dependent transcription factor ATF-2 isoform 1	-	175936977	176032934	4.33459	2.63069
ASHGA5P015043	1.863e-08	1.5617e-05	3.2578	up	noncoding	NR_045772	ATF2	RefSeq	4205	chr2	-	175936977	176032934	GGAAACTGAAGGACTCTAATTATCCACAGACCAGAGTGAAGTCACCCTGCTGAGAAATGA	exon sense-overlapping	NM_001256091	ATF2	cyclic AMP-dependent transcription factor ATF-2 isoform 2	-	175936977	176032934	4.33459	2.63069
ASHGA5P015043	1.863e-08	1.5617e-05	3.2578	up	noncoding	NR_045772	ATF2	RefSeq	4205	chr2	-	175936977	176032934	GGAAACTGAAGGACTCTAATTATCCACAGACCAGAGTGAAGTCACCCTGCTGAGAAATGA	exon sense-overlapping	NM_001256092	ATF2	cyclic AMP-dependent transcription factor ATF-2 isoform 3	-	175936977	176032934	4.33459	2.63069
ASHGA5P015043	1.863e-08	1.5617e-05	3.2578	up	noncoding	NR_045772	ATF2	RefSeq	4205	chr2	-	175936977	176032934	GGAAACTGAAGGACTCTAATTATCCACAGACCAGAGTGAAGTCACCCTGCTGAGAAATGA	exon sense-overlapping	NM_001256093	ATF2	cyclic AMP-dependent transcription factor ATF-2 isoform 4	-	175936977	176032934	4.33459	2.63069
ASHGA5P015043	1.863e-08	1.5617e-05	3.2578	up	noncoding	NR_045772	ATF2	RefSeq	4205	chr2	-	175936977	176032934	GGAAACTGAAGGACTCTAATTATCCACAGACCAGAGTGAAGTCACCCTGCTGAGAAATGA	exon sense-overlapping	NM_001256094	ATF2	cyclic AMP-dependent transcription factor ATF-2 isoform 5	-	175978970	176032934	4.33459	2.63069
ASHGA5P015043	1.863e-08	1.5617e-05	3.2578	up	noncoding	NR_045772	ATF2	RefSeq	4205	chr2	-	175936977	176032934	GGAAACTGAAGGACTCTAATTATCCACAGACCAGAGTGAAGTCACCCTGCTGAGAAATGA	exon sense-overlapping	NM_001880	ATF2	cyclic AMP-dependent transcription factor ATF-2 isoform 1	-	175936977	176032934	4.33459	2.63069
ASHGA5P041888	0.0190211	0.0591745	3.25208	up	noncoding	ENST00000511849	RP1-240B8.3	GENCODE	675	chr6	-	62340137	62390954	GGTCAACTTTGATTCAAAGATAGTCTTCAGTTACCAAACCTTATCACATGACTGTAAAAC	exon sense-overlapping	NM_152688	KHDRBS2	KH domain-containing, RNA-binding, signal transduction-associated protein 2	-	62389864	62996100	5.38458	3.68322
ASHGA5P050296	1.4912e-05	0.00116578	3.24952	up	noncoding	ENST00000576975	LINC00085	GENCODE	500	chr19	+	52207251	52208443	TTTAAACCCGCGTGTCCCGCAGCTCCGGACTCAGGACTTGTCCTATTTCCGAGATATGCC	intergenic							5.28053	3.58031
ASHGA5P019689	0.00560394	0.0292029	3.24643	up	noncoding	ENST00000552990	RP11-493L12.2	GENCODE	654	chr12	-	47599683	47610227	ACATGAAATGACCCTTGGCTCTTATTGTTCTTGCTGGTGTGGTATGTTCACGGCTGAAAA	natural antisense	NM_138371	PCED1B	protein FAM113B	+	47610051	47630443	9.87104	8.17218
ASHGA5P041273	0	0	3.24157	up	noncoding	ENST00000511468	RP11-346J10.1	GENCODE	563	chr5	+	99737144	99744603	CCATTGATATATGCCTCTAACTCCAGACCTTTTTGTCCTTAATCTTCTAATCCGGTTATC	intergenic							4.24481	2.54812
ASHGA5P020686	0.0334098	0.0809202	3.23767	up	noncoding	ENST00000518481	CTD-2336O2.1	GENCODE	579	chr8	-	1710790	1711463	GTTTGCTAAGAATCGACATCTAGAGGAGTACTCACCACTTAATTGATGATCAATACACGT	bidirectional	NM_018941	CLN8	protein CLN8	+	1711869	1734736	5.43704	3.74208
ASHGA5P031987	2.266e-08	1.635e-05	3.21438	up	noncoding	ENST00000563521	RP11-863P13.1	GENCODE	409	chr16	+	88210894	88212053	TACTCGGAAAGAAAAAGGTATCAGTTTTCCATCAAGGCACTTCCCATCTCAGACGTGGTC	intergenic							4.28447	2.59993
ASHGA5P032609	0.017221	0.0561113	3.21217	up	noncoding	ENST00000430983	AMZ2P1	GENCODE	3425	chr17	-	62962667	62971686	TCAAAAAGTCTCGTGGTGGAACATCTGACCCTTTTCAAGAGGAAGGATGAAAACTCTACA	intergenic							7.57043	5.88689
ASHGA5P017151	4.1572e-07	0.000132185	3.20701	up	noncoding	ENST00000440357	RP4-738P15.1	GENCODE	343	chr20	-	25124000	25129876	TGGATGCCCTGATTCAAGGAGATTCAAAACCCGTGTCACTGCTGCCATCTTCCTAGAATC	intergenic							4.96169	3.28046
ASHGA5P048794	0.0245959	0.068478	3.20029	up	noncoding	NR_045207	LOC729739	RefSeq	490	chr15	+	74653892	74654382	TGGATCCAATACAAACGGTTCCCAGTTTTTCATCTGCACTGACAAGACTGAGTGGTGGAT	intronic antisense	ENST00000268053	CYP11A1	cytochrome P450, family 11, subfamily A, polypeptide 1 [Source:HGNC Symbol;Acc:2590]	-	74630099	74660081	8.36071	6.6825
ASHGA5P048794	0.0245959	0.068478	3.20029	up	noncoding	NR_045207	LOC729739	RefSeq	490	chr15	+	74653892	74654382	TGGATCCAATACAAACGGTTCCCAGTTTTTCATCTGCACTGACAAGACTGAGTGGTGGAT	intronic antisense	ENST00000358632	CYP11A1	cytochrome P450, family 11, subfamily A, polypeptide 1 [Source:HGNC Symbol;Acc:2590]	-	74630099	74658547	8.36071	6.6825
ASHGA5P048794	0.0245959	0.068478	3.20029	up	noncoding	NR_045207	LOC729739	RefSeq	490	chr15	+	74653892	74654382	TGGATCCAATACAAACGGTTCCCAGTTTTTCATCTGCACTGACAAGACTGAGTGGTGGAT	intronic antisense	ENST00000416978	CYP11A1	cytochrome P450, family 11, subfamily A, polypeptide 1 [Source:HGNC Symbol;Acc:2590]	-	74637551	74659987	8.36071	6.6825
ASHGA5P048794	0.0245959	0.068478	3.20029	up	noncoding	NR_045207	LOC729739	RefSeq	490	chr15	+	74653892	74654382	TGGATCCAATACAAACGGTTCCCAGTTTTTCATCTGCACTGACAAGACTGAGTGGTGGAT	intronic antisense	ENST00000419019	CYP11A1	cytochrome P450, family 11, subfamily A, polypeptide 1 [Source:HGNC Symbol;Acc:2590]	-	74630102	74658499	8.36071	6.6825
ASHGA5P048794	0.0245959	0.068478	3.20029	up	noncoding	NR_045207	LOC729739	RefSeq	490	chr15	+	74653892	74654382	TGGATCCAATACAAACGGTTCCCAGTTTTTCATCTGCACTGACAAGACTGAGTGGTGGAT	intronic antisense	ENST00000433240	CYP11A1	cytochrome P450, family 11, subfamily A, polypeptide 1 [Source:HGNC Symbol;Acc:2590]	-	74637420	74659987	8.36071	6.6825
ASHGA5P048794	0.0245959	0.068478	3.20029	up	noncoding	NR_045207	LOC729739	RefSeq	490	chr15	+	74653892	74654382	TGGATCCAATACAAACGGTTCCCAGTTTTTCATCTGCACTGACAAGACTGAGTGGTGGAT	intronic antisense	ENST00000450547	CYP11A1	cytochrome P450, family 11, subfamily A, polypeptide 1 [Source:HGNC Symbol;Acc:2590]	-	74636196	74658519	8.36071	6.6825
ASHGA5P048794	0.0245959	0.068478	3.20029	up	noncoding	NR_045207	LOC729739	RefSeq	490	chr15	+	74653892	74654382	TGGATCCAATACAAACGGTTCCCAGTTTTTCATCTGCACTGACAAGACTGAGTGGTGGAT	intronic antisense	ENST00000541301	CYP11A1	cytochrome P450, family 11, subfamily A, polypeptide 1 [Source:HGNC Symbol;Acc:2590]	-	74632075	74659987	8.36071	6.6825
ASHGA5P048794	0.0245959	0.068478	3.20029	up	noncoding	NR_045207	LOC729739	RefSeq	490	chr15	+	74653892	74654382	TGGATCCAATACAAACGGTTCCCAGTTTTTCATCTGCACTGACAAGACTGAGTGGTGGAT	intronic antisense	ENST00000569662	CYP11A1	cytochrome P450, family 11, subfamily A, polypeptide 1 [Source:HGNC Symbol;Acc:2590]	-	74637455	74658499	8.36071	6.6825
ASHGA5P048794	0.0245959	0.068478	3.20029	up	noncoding	NR_045207	LOC729739	RefSeq	490	chr15	+	74653892	74654382	TGGATCCAATACAAACGGTTCCCAGTTTTTCATCTGCACTGACAAGACTGAGTGGTGGAT	intronic antisense	NM_000781	CYP11A1	cholesterol side-chain cleavage enzyme, mitochondrial isoform a precursor	-	74630102	74660081	8.36071	6.6825
ASHGA5P048794	0.0245959	0.068478	3.20029	up	noncoding	NR_045207	LOC729739	RefSeq	490	chr15	+	74653892	74654382	TGGATCCAATACAAACGGTTCCCAGTTTTTCATCTGCACTGACAAGACTGAGTGGTGGAT	intronic antisense	NM_001099773	CYP11A1	cholesterol side-chain cleavage enzyme, mitochondrial isoform b	-	74630102	74658553	8.36071	6.6825
ASHGA5P052546	0.000381899	0.00695946	3.19741	up	noncoding	ENST00000508309	CTC-205M6.2	GENCODE	671	chr5	+	180258026	180261779	TTTGACAGCCGTGAGCTTCCCCGCCAGGAACTTACTGGGGCTGCATCACCCTAGAAACGT	intergenic							5.33945	3.66254
ASHGA5P016840	0.0295538	0.0759308	3.19662	up	noncoding	uc003spd.2	ZNF815	UCSC_knowngene	1135	chr7	+	5862790	5894066	AGCTTCCCAGAAAGCTGACTTCATGAGACCGAGGATCTCGTTCGTTGATCGATGCTACAT	intergenic							5.34075	3.6642
ASHGA5P020121	0.00337141	0.0217697	3.19552	up	noncoding	ENST00000508517	AC010226.4	GENCODE	539	chr5	+	114937940	114955975	CACAGTACAGTTACACCAGCCTCCTGAGTATGACAGCAACATTCCTTCAGGGATTAAAGA	intronic antisense	NM_001164468	TMED7-TICAM2	TRAM adaptor with GOLD domain isoform 1 precursor	-	114914338	114961876	5.39825	3.7222
ASHGA5P020121	0.00337141	0.0217697	3.19552	up	noncoding	ENST00000508517	AC010226.4	GENCODE	539	chr5	+	114937940	114955975	CACAGTACAGTTACACCAGCCTCCTGAGTATGACAGCAACATTCCTTCAGGGATTAAAGA	intronic antisense	NM_001164469	TMED7-TICAM2	TRAM adaptor with GOLD domain isoform 2 precursor	-	114914338	114961876	5.39825	3.7222
ASHGA5P020121	0.00337141	0.0217697	3.19552	up	noncoding	ENST00000508517	AC010226.4	GENCODE	539	chr5	+	114937940	114955975	CACAGTACAGTTACACCAGCCTCCTGAGTATGACAGCAACATTCCTTCAGGGATTAAAGA	intronic antisense	NM_181836	TMED7	transmembrane emp24 domain-containing protein 7 precursor	-	114948904	114961876	5.39825	3.7222
ASHGA5P020121	0.00337141	0.0217697	3.19552	up	noncoding	ENST00000508517	AC010226.4	GENCODE	539	chr5	+	114937940	114955975	CACAGTACAGTTACACCAGCCTCCTGAGTATGACAGCAACATTCCTTCAGGGATTAAAGA	natural antisense	NM_021649	TICAM2	TIR domain-containing adapter molecule 2	-	114914338	114938176	5.39825	3.7222
ASHGA5P018733	0.0304274	0.0770164	3.19453	up	noncoding	ENST00000457025	RP4-717I23.3	GENCODE	413	chr1	-	93730196	93804088	GGACTAAATTGAGGGCTCTGAGAGATTTCATTTCTGTCCTGCTGATGAAGTCTACGTTCA	natural antisense	NM_206886	CCDC18	coiled-coil domain-containing protein 18	+	93646280	93744287	5.68839	4.01279
ASHGA5P051663	0.0365609	0.0850557	3.19326	up	noncoding	ENST00000506593	RPL32P3	GENCODE	498	chr3	-	129115038	129118498	CAATGTCAAGGAGCTGAGAGTGCTGCTGATATGCAACAAGTGAGTTGGGTCCATCTCTGG	intergenic							8.85974	7.18471
ASHGA5P014824	0.0345596	0.0823874	3.18682	up	noncoding	ENST00000413722	RP11-322M19.1	GENCODE	732	chr10	-	89047713	89102044	ATTAACAGACAAGACACTTTTCAGAAAGACAGGCAACGTGTTGGACCTTCCGGAGCTTCT	intergenic							5.97355	4.30144
ASHGA5P048911	0.0301178	0.0766959	3.18288	up	noncoding	NR_037602	LOC100507217	RefSeq	1497	chr15	+	93426525	93441977	AAGTTTAATTAAATGTTTAGTTTTATTTTAGTAATACTTTGGCCTTTGTAGTTGCCGAGT	exon sense-overlapping	ENST00000556722	CHD2	chromodomain helicase DNA binding protein 2 [Source:HGNC Symbol;Acc:1917]	+	93426525	93480855	5.31955	3.64921
ASHGA5P036180	0.0128582	0.0472073	3.18243	up	noncoding	NR_040248	ZEB2-AS1	RefSeq	430	chr2	+	145277180	145278465	TCAATAAAACTTTTCCTGGGCTGGATAGCAAAGGACACCTTTGGTTACCTGAATGAACAG	natural antisense	NM_001171653	ZEB2	zinc finger E-box-binding homeobox 2 isoform 2	-	145141941	145277958	5.26505	3.59492
ASHGA5P036180	0.0128582	0.0472073	3.18243	up	noncoding	NR_040248	ZEB2-AS1	RefSeq	430	chr2	+	145277180	145278465	TCAATAAAACTTTTCCTGGGCTGGATAGCAAAGGACACCTTTGGTTACCTGAATGAACAG	natural antisense	NM_014795	ZEB2	zinc finger E-box-binding homeobox 2 isoform 1	-	145141941	145277958	5.26505	3.59492
ASHGA5P017742	0.000490957	0.00813311	3.18076	up	noncoding	ENST00000445272	RP1-28O10.1	GENCODE	381	chr1	-	209834708	209848592	CTCCGACTGTCTGGACCCTGGGTACCTGGCTGAAGACTTTGGACTTTAACCTGGAGATGA	bidirectional	NM_015714	G0S2	G0/G1 switch protein 2	+	209848669	209849735	5.80324	4.13387
ASHGA5P018940	0.0364399	0.0849804	3.17736	up	noncoding	ENST00000475441	SNHG12	GENCODE	444	chr1	-	28905049	28907741	ACTTAAGCAGATGAAGACTCTTAAGATGACAGAAGGTGATTTTTCTGGTGATCGAGGACT	natural antisense	NM_017846	TRNAU1AP	tRNA selenocysteine 1-associated protein 1	+	28879528	28905057	5.89356	4.22573
ASHGA5P036270	0.0100934	0.0408926	3.17395	up	noncoding	ENST00000428541	AC079305.10	GENCODE	499	chr2	+	178129086	178130243	ATTGCCCACCCAGAGCTGGGAGAAAAACGGGAACCCCAAGAGAACCTCTTCCCACCAAAG	natural antisense	NM_006164	NFE2L2	nuclear factor erythroid 2-related factor 2 isoform 1	-	178095030	178129859	8.59284	6.92656
ASHGA5P019489	0.00118274	0.0126227	3.17339	up	noncoding	ENST00000487582	TMEM198B	GENCODE	1581	chr12	+	56226630	56230030	TGAAATAGCCTTTTAAATGTTCACCTCAGCTTGCCTCACAGTGGGTCTGTTCCTGGTTTC	natural antisense	NM_002429	MMP19	matrix metalloproteinase-19 isoform rasi-1 preproprotein	-	56229213	56236735	5.6115	3.94548
ASHGA5P040484	0.012706	0.0468335	3.16723	up	noncoding	NR_027439	LOC100272216	RefSeq	2049	chr5	-	68926979	68929028	ATGGCACCAGTGACAGAGCGACCATAATGGATGAATAAGCGCAGCCAGGTACCCGCGCAA	intergenic							7.19135	5.52813
ASHGA5P020709	0.0345342	0.0823874	3.1664	up	noncoding	ENST00000518822	CTD-2336O2.1	GENCODE	978	chr8	-	1710155	1712505	CAGCGTCGCGAATCGACATCTAGAGGAGTACTCACCACTTAATTGATGATCAATACACGT	intronic antisense	NM_018941	CLN8	protein CLN8	+	1711869	1734736	5.10325	3.4404
ASHGA5P054227	0.00654114	0.0315694	3.15376	up	noncoding	ENST00000539453	BCORP1	GENCODE	942	chrY	-	21628825	21665034	TGGCAAGATACCTCTTGGCACTTGTTTTCTCCTTGGGCTTATATAGAGGCTATTTCCCCT	intergenic							9.67668	8.01961
ASHGA5P058649	0.0476889	0.099609	3.14786	up	noncoding	uc021zty.1	BC013828	UCSC_knowngene	196	chr6_qbl_hap6	-	2643205	2643563	GCTTGTAAAGCCTGAGGCAGCTGTCTTGTGAGGGACTGAGATGCAGGATTTCTTCACGCC	intergenic							8.56094	6.90656
ASHGA5P003753	0.006546	0.0315694	3.14776	up	noncoding	ENST00000529061	PMS2P3	pseudogene	1254	chr7	-	75132253	75157139	AACAGGAAATGAACACATTGCAGGGGCCAGTGTCATTCAAAGATGTGGCTGTGGATTTCA								4.85897	3.20465
ASHGA5P031041	0.00089645	0.0110338	3.14707	up	noncoding	ENST00000563176	RP11-449H11.1	GENCODE	432	chr16	-	25111884	25122735	GATGCTGCCATCTCCGTCTTGAATGTCTCTGCTGACATGACCTGCTAAACTTGAACTCAT	bidirectional	NM_001032391	LCMT1	leucine carboxyl methyltransferase 1 isoform b	+	25123046	25189551	5.32266	3.66865
ASHGA5P031041	0.00089645	0.0110338	3.14707	up	noncoding	ENST00000563176	RP11-449H11.1	GENCODE	432	chr16	-	25111884	25122735	GATGCTGCCATCTCCGTCTTGAATGTCTCTGCTGACATGACCTGCTAAACTTGAACTCAT	bidirectional	NM_016309	LCMT1	leucine carboxyl methyltransferase 1 isoform a	+	25123046	25189551	5.32266	3.66865
ASHGA5P034670	1.91e-09	5.871e-06	3.13908	up	noncoding	TCONS_00015914	XLOC_007276	LincRNAs identified by Cabili et al	471	chr9	+	7177837	7202875	AAGCCAAGAACGTCCTGATCTAAACTACAGAGCCCTCAGAAGACTCAGAACAACACACAA	intergenic							4.23404	2.58369
ASHGA5P027204	0.0150795	0.0520774	3.13901	up	noncoding	ENST00000553202	RP11-350F4.2	GENCODE	5008	chr12	-	44112795	44117803	CATGAACACCTCTTTAATCACAAGTCCTCAACTCCAAGGTTAGCTTTATTTCAACTTTTA	intergenic							5.98697	4.33666
ASHGA5P044513	0.0252736	0.0695874	3.12975	up	noncoding	ENST00000530778	RP11-383J24.5	GENCODE	1767	chr8	-	125485050	125486817	GATCTTCAGAAATATAAATTAGCTACTCAACATATCTGTTATTCTGCCCTGATTGCACTG	bidirectional	NM_007218	RNF139	E3 ubiquitin-protein ligase RNF139	+	125487007	125500859	5.17151	3.52546
ASHGA5P016842	0.0344709	0.0823034	3.1291	up	noncoding	ENST00000434914	RP11-160C18.4	GENCODE	392	chr15	+	79044448	79045715	TTTCCTGGGGCTGGAAGCTGATCAGTATCTCCTTTGGGGACCTGAACCCTTTCCCCGTAC	intergenic							8.6432	6.99746
ASHGA5P030005	0.035864	0.0841052	3.12891	up	noncoding	uc001zwf.1	AK021664	UCSC_knowngene	2145	chr15	-	48426827	48428972	GGGCCAACATGATAGTGTTGAGACCTGTAATATGGTAAGTTATTATTTCCATTACATTGT	natural antisense	NM_205850	SLC24A5	sodium/potassium/calcium exchanger 5 precursor	+	48413168	48434589	5.03451	3.38886
ASHGA5P056884	0.00197449	0.016431	3.12452	up	noncoding	TCONS_00010217	XLOC_004685	LincRNAs identified by Cabili et al	508	chr5	+	180296861	180298361	TGAAAAATGGCACCTGCTCCAAGCCATAATATCTGGAATGTGTGGCCTTCAGAATTGCCA	intergenic							6.77842	5.13479
ASHGA5P036962	0.000671824	0.00972356	3.124	up	noncoding	NR_015432	LINC00493	RefSeq	561	chr20	+	18548072	18550203	GCACCTGGTCTGTGTTGGGCTCACTGCTTTACTATAGCCGGACAATGGCGAAGTCGTCAG	intergenic							7.42112	5.77773
ASHGA5P042112	0.00115444	0.0124504	3.11942	up	noncoding	NR_034115	STXBP5-AS1	RefSeq	3082	chr6	-	147162524	147525750	GCTGAGCTTTTGGAATAGATTTTCCTGTACTATATATGACTGCCAGTGGGAGAATTTGAA	natural antisense	NM_001127715	STXBP5	syntaxin-binding protein 5 isoform b	+	147525493	147711612	7.93554	6.29427
ASHGA5P042112	0.00115444	0.0124504	3.11942	up	noncoding	NR_034115	STXBP5-AS1	RefSeq	3082	chr6	-	147162524	147525750	GCTGAGCTTTTGGAATAGATTTTCCTGTACTATATATGACTGCCAGTGGGAGAATTTGAA	natural antisense	NM_139244	STXBP5	syntaxin-binding protein 5 isoform a	+	147525493	147711612	7.93554	6.29427
ASHGA5P040391	0.0297326	0.0761016	3.11267	up	noncoding	ENST00000514048	RP11-1023L17.1	GENCODE	5001	chr5	-	34164802	34189619	ATGAAGTGAGTACCTGGAGGAACTCCTACATTTTAGGCTTTCAAAGGTTACAGGCTTTTC	intergenic							5.73434	4.09619
ASHGA5P046966	0.00290557	0.0201249	3.11256	up	noncoding	ENST00000484794	RP11-773D16.1	GENCODE	233	chr10	-	81564240	81574400	CCCTCTCGTACTTTAGTTCTGTGGATCCAAAATTTATAGCATTCTTCTACCACCACAGGG	intergenic							6.55819	4.92009
ASHGA5P014767	0.0329936	0.0803787	3.10479	up	noncoding	ENST00000413202	LINC00152	GENCODE	422	chr2	+	87808732	87821033	TTTCGACGAGAATAACTGGGAGATGAAACAGGAAGCTCTATGACACACTTGATCGAATAT	intergenic							5.92668	4.29218
ASHGA5P048954	0.00201211	0.016598	3.10265	up	noncoding	ENST00000544386	Z97634.5	GENCODE	661	chr16	+	436662	437323	TTTTCACAAGATGGCGCTGAAAGCAAAGAAGGAAGCTCCTGCCTCTCCTGAAGCCGAAGC	natural antisense	ENST00000427313	TMEM8A	transmembrane protein 8A [Source:HGNC Symbol;Acc:17205]	-	426805	436999	5.93985	4.30635
ASHGA5P041577	0.00466188	0.0262758	3.09438	up	noncoding	ENST00000514635	RP11-423H2.1	GENCODE	250	chr5	+	177309686	177344268	CAGCTTTGCGTACCTGTAATAAATTCCACTTAGCCATGGCATGTAGTTTTTTAAAAATAC	intergenic							5.34879	3.71914
ASHGA5P027411	0.00820107	0.0359591	3.09435	up	noncoding	ENST00000546086	RP11-81H14.2	GENCODE	565	chr12	-	68727032	68835996	GATCCTGTAGCCCTTATTATTGACACCTTTCATTTAGAAATTTAGCACATGTCACATTAC	intergenic							6.94576	5.31612
ASHGA5P013202	0.0274422	0.0728395	3.08481	up	noncoding	NR_047512	APBB1	RefSeq	2267	chr11	-	6416354	6440332	TGCGTGCATGGTGGAACAGGAGGAACTGGTCCAGGCCAGGCCTCATCCTCCTGGACCCAG	exon sense-overlapping	NM_001164	APBB1	amyloid beta A4 precursor protein-binding family B member 1 isoform a	-	6416354	6440332	5.48053	3.85535
ASHGA5P013202	0.0274422	0.0728395	3.08481	up	noncoding	NR_047512	APBB1	RefSeq	2267	chr11	-	6416354	6440332	TGCGTGCATGGTGGAACAGGAGGAACTGGTCCAGGCCAGGCCTCATCCTCCTGGACCCAG	exon sense-overlapping	NM_001257319	APBB1	amyloid beta A4 precursor protein-binding family B member 1 isoform g	-	6416354	6426163	5.48053	3.85535
ASHGA5P013202	0.0274422	0.0728395	3.08481	up	noncoding	NR_047512	APBB1	RefSeq	2267	chr11	-	6416354	6440332	TGCGTGCATGGTGGAACAGGAGGAACTGGTCCAGGCCAGGCCTCATCCTCCTGGACCCAG	exon sense-overlapping	NM_001257320	APBB1	amyloid beta A4 precursor protein-binding family B member 1 isoform d	-	6416354	6426891	5.48053	3.85535
ASHGA5P013202	0.0274422	0.0728395	3.08481	up	noncoding	NR_047512	APBB1	RefSeq	2267	chr11	-	6416354	6440332	TGCGTGCATGGTGGAACAGGAGGAACTGGTCCAGGCCAGGCCTCATCCTCCTGGACCCAG	exon sense-overlapping	NM_001257321	APBB1	amyloid beta A4 precursor protein-binding family B member 1 isoform d	-	6416354	6426891	5.48053	3.85535
ASHGA5P013202	0.0274422	0.0728395	3.08481	up	noncoding	NR_047512	APBB1	RefSeq	2267	chr11	-	6416354	6440332	TGCGTGCATGGTGGAACAGGAGGAACTGGTCCAGGCCAGGCCTCATCCTCCTGGACCCAG	exon sense-overlapping	NM_001257322	APBB1	amyloid beta A4 precursor protein-binding family B member 1 isoform h	-	6422281	6426163	5.48053	3.85535
ASHGA5P013202	0.0274422	0.0728395	3.08481	up	noncoding	NR_047512	APBB1	RefSeq	2267	chr11	-	6416354	6440332	TGCGTGCATGGTGGAACAGGAGGAACTGGTCCAGGCCAGGCCTCATCCTCCTGGACCCAG	exon sense-overlapping	NM_001257323	APBB1	amyloid beta A4 precursor protein-binding family B member 1 isoform f	-	6416354	6426163	5.48053	3.85535
ASHGA5P013202	0.0274422	0.0728395	3.08481	up	noncoding	NR_047512	APBB1	RefSeq	2267	chr11	-	6416354	6440332	TGCGTGCATGGTGGAACAGGAGGAACTGGTCCAGGCCAGGCCTCATCCTCCTGGACCCAG	exon sense-overlapping	NM_001257324	APBB1	amyloid beta A4 precursor protein-binding family B member 1 isoform c	-	6422281	6440332	5.48053	3.85535
ASHGA5P013202	0.0274422	0.0728395	3.08481	up	noncoding	NR_047512	APBB1	RefSeq	2267	chr11	-	6416354	6440332	TGCGTGCATGGTGGAACAGGAGGAACTGGTCCAGGCCAGGCCTCATCCTCCTGGACCCAG	exon sense-overlapping	NM_001257325	APBB1	amyloid beta A4 precursor protein-binding family B member 1 isoform e	-	6416354	6425894	5.48053	3.85535
ASHGA5P013202	0.0274422	0.0728395	3.08481	up	noncoding	NR_047512	APBB1	RefSeq	2267	chr11	-	6416354	6440332	TGCGTGCATGGTGGAACAGGAGGAACTGGTCCAGGCCAGGCCTCATCCTCCTGGACCCAG	exon sense-overlapping	NM_001257326	APBB1	amyloid beta A4 precursor protein-binding family B member 1 isoform d	-	6416354	6426891	5.48053	3.85535
ASHGA5P013202	0.0274422	0.0728395	3.08481	up	noncoding	NR_047512	APBB1	RefSeq	2267	chr11	-	6416354	6440332	TGCGTGCATGGTGGAACAGGAGGAACTGGTCCAGGCCAGGCCTCATCCTCCTGGACCCAG	exon sense-overlapping	NM_145689	APBB1	amyloid beta A4 precursor protein-binding family B member 1 isoform b	-	6416354	6440644	5.48053	3.85535
ASHGA5P020079	0.0250018	0.0691665	3.08451	up	noncoding	uc003jcp.4	LOC728613	UCSC_knowngene	3701	chr5	-	1597671	1634120	GCTGACATTTCTTGCGCACGTGGACTCCCTTTAATCCAGTGACTGTCAGGTCGATCATAT	intergenic							5.56	3.93496
ASHGA5P035174	0.0426776	0.0934751	3.08394	up	noncoding	ENST00000411738	AC159540.1	GENCODE	724	chr2	-	98081773	98089122	AGTATTCCTGGTCTCGAATCATCCTGATATTCTTCATTTTGTTATTCACATTGGACTAGG	intergenic							6.97773	5.35296
ASHGA5P018604	0.030481	0.0771098	3.0834	up	noncoding	ENST00000455474	RP4-717I23.3	GENCODE	299	chr1	-	93730206	93803026	GGTATTGAAAGAGGGCTCTGAGAGATTTCATTTCTGTCCTGCTGATGAAGTCTACGTTCA	natural antisense	NM_206886	CCDC18	coiled-coil domain-containing protein 18	+	93646280	93744287	5.66871	4.04419
ASHGA5P026818	0.00299214	0.0203325	3.07979	up	noncoding	TCONS_00011820	XLOC_005303	LincRNAs identified by Cabili et al	597	chr6	+	45633187	45634483	GGAGCTGGCCTATAAATCCTAAATACAGATGTAGTGATTGAACCCATCTAGGTAGCTTAT	intergenic							4.90492	3.28209
ASHGA5P056845	6.9e-09	7.953e-06	3.07029	up	noncoding	TCONS_00009840	XLOC_004256	LincRNAs identified by Cabili et al	2837	chr5	+	2917972	2932455	GAAAGCCAGAAAAAATGAAAAAGACCCTTCCACATTTCTTGCCTCATGACCACTTCCACG	intergenic							4.76648	3.1481
ASHGA5P032027	0.0291096	0.0753354	3.06965	up	noncoding	ENST00000423684	AFG3L1P	GENCODE	595	chr16	+	90044101	90051109	TTATTTCGTGTAAAAATGTAGTTTTCTATTTTTTTCAGTAAAATACTCCCTTAGTATCCA	intergenic							5.90573	4.28766
ASHGA5P050500	0.0269458	0.0720404	3.06747	up	noncoding	ENST00000457602	AC097495.2	GENCODE	574	chr2	+	69062135	69064856	CTACTCTATTGGTATCAGGTTGCATTCTGTATCATCATTAAAATTTTCAGAAAAACTCTC	intergenic							6.23071	4.61367
ASHGA5P034249	8.14119e-05	0.00304914	3.06279	up	noncoding	uc002pda.1	AX746967	UCSC_knowngene	2995	chr19	-	46217644	46220639	TGCATTTTTCTGACTGAGGACACACAGCTTTAATAAATTCTCATTAAGCCCCACTACCTG	intron sense-overlapping	NM_001080469	FBXO46	F-box only protein 46	-	46213886	46234151	5.4014	3.78655
ASHGA5P029642	0.0392219	0.088618	3.05936	up	noncoding	NR_027046	LOC145474	RefSeq	1859	chr14	+	71954577	71956420	ATATATTCTTCAGTGTGATTTAGGTGAGTCAGGAATTTTTCCTCTGGAGACTGCCTAAAT	intron sense-overlapping	ENST00000557151	SIPA1L1	signal-induced proliferation-associated 1 like 1 [Source:HGNC Symbol;Acc:20284]	+	71788107	72054686	6.37322	4.75999
ASHGA5P035134	0.0262275	0.0709207	3.0589	up	noncoding	NR_038942	LOC100630918	RefSeq	1432	chr2	-	85764589	85766009	GCAGCAAGAAAAGGTTCGACCACAAAAGAGACAATAGGTGATGATATTTTTATTCGTTGC	bidirectional	NM_005911	MAT2A	S-adenosylmethionine synthase isoform type-2	+	85766100	85772403	5.80692	4.19391
ASHGA5P021210	0.0119465	0.0450917	3.05615	up	noncoding	ENST00000528437	RP11-693N9.2	GENCODE	586	chr11	-	104772275	104788872	GACAGCCAGGATAACGTGTCCAGGAGAGACAGCACAAGGGGCTCCATCTTCATCACACAA	intergenic							7.18147	5.56976
ASHGA5P053396	0.0479889	0.100008	3.05536	up	noncoding	ENST00000454813	GAS5	GENCODE	621	chr1	-	173833039	173834009	GATTCTGAGGTTACTCTACTAACAAGCATCACACATTTGTATTTTGCCCTGATTAATATG	intergenic							5.69558	4.08424
ASHGA5P026217	0.0207147	0.0618808	3.05512	up	noncoding	uc001mke.3	AK026905	UCSC_knowngene	3237	chr11	+	12237840	12241077	GATACACTAAACTTGCCAGCTCTCTTCAATCCTCACATCCTGTGTTTCATTGCTAGTGTC	exon sense-overlapping	NM_014632	MICAL2	protein-methionine sulfoxide oxidase MICAL2	+	12132137	12285331	6.49517	4.88394
ASHGA5P028121	0.00557029	0.0291508	3.04684	up	noncoding	ENST00000536914	IFNG-AS1	GENCODE	494	chr12	+	68383308	68628466	CATGTCTTCCATGGGTTGTGCCCTGAATCAATGCATTTATTAATTCTTTCAAAATGCAAA	intronic antisense	NM_000619	IFNG	interferon gamma precursor	-	68548549	68553521	5.64088	4.03356
ASHGA5P028121	0.00557029	0.0291508	3.04684	up	noncoding	ENST00000536914	IFNG-AS1	GENCODE	494	chr12	+	68383308	68628466	CATGTCTTCCATGGGTTGTGCCCTGAATCAATGCATTTATTAATTCTTTCAAAATGCAAA	intronic antisense	NM_018402	IL26	interleukin-26 precursor	-	68595128	68619571	5.64088	4.03356
ASHGA5P013973	0.0268731	0.0719504	3.04145	up	noncoding	uc002ije.3	LRRC37A4	UCSC_knowngene	2746	chr17	-	43578683	43592891	GGAGAGTCAGACGGCCGCTCTGGCTTAAAGATATGTACAAACCTCTCAGTGCCACAAGAG	intronic antisense	ENST00000253803	AC091132.2	Uncharacterized protein [Source:UniProtKB/TrEMBL;Acc:H7BXE8]	+	43580625	43611631	6.36841	4.76365
ASHGA5P041309	0.0281457	0.0739828	3.03797	up	noncoding	ENST00000507558	CTB-118N6.3	GENCODE	436	chr5	+	115806885	115808334	GAGCATTATTCCTTTGTCTTGGATATACTTATGTTCAAAAGCAATTTCTTCTCCCTCAAG	intronic antisense	NM_020796	SEMA6A	semaphorin-6A precursor	-	115779250	115910551	5.54959	3.94648
ASHGA5P045321	0.0157229	0.0533307	3.03338	up	noncoding	ENST00000423380	RP11-305L7.1	GENCODE	815	chr9	-	93867238	93869586	GAATGGGAACATTGTCTGTCATCCCTAGACTGCATTAAAGACCTAAACTGCTTCCATTTA	intergenic							6.37052	4.76959
ASHGA5P040327	0.0445762	0.0957906	3.03195	up	noncoding	uc001emi.4	BC065231	UCSC_knowngene	507	chr1	+	145004780	145005287	GAGTGAAGGCAATTTTGAAGGCATGACTACGACCTGCTCTGGCCACAAGAGCTAAGAGTT	intronic antisense	NM_001198832	PDE4DIP	myomegalin isoform 8	-	144851423	145039992	5.40369	3.80345
ASHGA5P040327	0.0445762	0.0957906	3.03195	up	noncoding	uc001emi.4	BC065231	UCSC_knowngene	507	chr1	+	145004780	145005287	GAGTGAAGGCAATTTTGAAGGCATGACTACGACCTGCTCTGGCCACAAGAGCTAAGAGTT	intronic antisense	NM_022359	PDE4DIP	myomegalin isoform 3	-	144951760	145076186	5.40369	3.80345
ASHGA5P015373	0.0300582	0.0765984	3.0317	up	noncoding	ENST00000419697	RP11-773D16.1	GENCODE	513	chr10	-	81563812	81574410	CAGCCCTAAGGCTCATATGACATTAACAGACAAGACACTTTTCAGAAAGACAGGTAAGTC	intergenic							5.67185	4.07172
ASHGA5P043393	0.0059777	0.0300387	3.03047	up	noncoding	TCONS_00018746	XLOC_008504	LincRNAs identified by Cabili et al	449	chr10	+	70817726	70830098	CTGCAGGCATCCCAAGTTGAGGTTCAAGAGAGTTATGCCCAGGAGCCCTGGATTTTCTGA	intergenic							4.53079	2.93125
ASHGA5P019364	0.0291828	0.0754074	3.02993	up	noncoding	ENST00000479920	RP11-506M13.3	GENCODE	448	chr10	+	81420644	81430911	TTATTTCAAGGCTCATATGACATTAACAGACAAGACACTTTTCAGAAAGACAGGTAAGTC	intergenic							5.36981	3.77053
ASHGA5P018571	0.0330575	0.0804708	3.02857	up	noncoding	ENST00000455131	LINC00152	GENCODE	733	chr2	+	87755023	87820932	GGTGCTTCAGAATAACTGGGAGATGAAACAGGAAGCTCTATGACACACTTGATCGAATAT	intergenic							5.95729	4.35865
ASHGA5P017215	0.0285338	0.0744483	3.02163	up	noncoding	ENST00000438935	AC007390.6	GENCODE	367	chr2	+	37440609	37443336	CTAACTGTGGTTTCAACTGTCTAAGGTTTATACTTACCAGGAAGATGACGAATATCCTTA	natural antisense	NM_005760	CEBPZ	CCAAT/enhancer-binding protein zeta	-	37428774	37458740	5.45547	3.86014
ASHGA5P032131	0.0314631	0.0785811	3.01886	up	noncoding	ENST00000573222	RP11-589P10.5	GENCODE	343	chr17	-	6897960	6898508	AGATCTTGATTCAAGTGATTATATGCATTTGGATCTCCGTGGATGCATCTGGTGGCCTGG	intron sense-overlapping	ENST00000399541	MIR497HG	mir-497-195 cluster host gene (non-protein coding) [Source:HGNC Symbol;Acc:39523]	-	6888427	6915653	5.77715	4.18315
ASHGA5P032131	0.0314631	0.0785811	3.01886	up	noncoding	ENST00000573222	RP11-589P10.5	GENCODE	343	chr17	-	6897960	6898508	AGATCTTGATTCAAGTGATTATATGCATTTGGATCTCCGTGGATGCATCTGGTGGCCTGG	intron sense-overlapping	ENST00000575889	MIR497HG	mir-497-195 cluster host gene (non-protein coding) [Source:HGNC Symbol;Acc:39523]	-	6780106	6915636	5.77715	4.18315
ASHGA5P038033	0.000178331	0.00473889	3.0182	up	noncoding	AI201012		LincRNAs identified by Khalil et al	453	chr13	-	43773843	43774299	TTCATCGTCTTAGAGGAAACATCCAAAATACATTTGAGCCTCCTGCTCTCCTGCGAGAAG	intergenic							5.33455	3.74086
ASHGA5P036965	0.0306287	0.0773561	3.01669	up	noncoding	NR_026885	LOC100270804	RefSeq	2034	chr20	+	18774692	18776709	GCTGACATCATTGGAAAAGTGCATCACTTAGAAAATGTATCTGTGTGTCAATTTTGTTTG	intergenic							6.64864	5.05568
ASHGA5P058016	0.008041	0.0355106	3.01162	up	noncoding	TCONS_00025362	XLOC_012177	LincRNAs identified by Cabili et al	950	chr17	+	33648816	33652433	TTCCATCCCTTGTGGAAGAGAGCATGTAAGCAAGACAGGACCTTCAGGCCTCTGAAAAAA	intergenic							10.9744	9.38382
ASHGA5P052201	0.00720146	0.0333524	3.00034	up	noncoding	ENST00000508677	RP11-321E2.3	GENCODE	296	chr5	+	17404127	17441803	GACCCTTTGATGCGTTCTGAATAAATATTCCTTTTGGAATTGAACTTCTAGAGCCCTTAA	intergenic							6.18525	4.60013
ASHGA5P016376	0.0343028	0.0820936	2.99324	up	noncoding	ENST00000446528	RP4-717I23.3	GENCODE	489	chr1	-	93730201	93792474	CAACATACAAGAGGGCTCTGAGAGATTTCATTTCTGTCCTGCTGATGAAGTCTACGTTCA	natural antisense	NM_206886	CCDC18	coiled-coil domain-containing protein 18	+	93646280	93744287	5.78748	4.20577
ASHGA5P051521	0.00207685	0.0167994	2.99313	up	noncoding	NR_024584	LOC728875	RefSeq	772	chr1	-	144480745	144521969	TGGTTCTTCCGGTTCTTTGTGCCGCCTTCACCCAGTGAAGGAGCCTGTATCCACCCTGCC	natural antisense	ENST00000538264	AL592284.2	Uncharacterized protein [Source:UniProtKB/TrEMBL;Acc:F5H305]	+	144339737	144521058	5.16443	3.58277
ASHGA5P021191	6.56e-08	3.1837e-05	2.98707	up	noncoding	ENST00000527695	RP11-652L8.2	GENCODE	233	chr11	-	117886486	117957508	TCACACACTCTGGCCTCTGCAGAACCTAATGTTGGGGTGAGGACTCCATCAGCACCTTGG	intronic antisense	NM_001083947	TMPRSS4	transmembrane protease serine 4 isoform 3	+	117947726	117990556	4.47531	2.89658
ASHGA5P021191	6.56e-08	3.1837e-05	2.98707	up	noncoding	ENST00000527695	RP11-652L8.2	GENCODE	233	chr11	-	117886486	117957508	TCACACACTCTGGCCTCTGCAGAACCTAATGTTGGGGTGAGGACTCCATCAGCACCTTGG	intronic antisense	NM_001173551	TMPRSS4	transmembrane protease serine 4 isoform 4	+	117947726	117990556	4.47531	2.89658
ASHGA5P021191	6.56e-08	3.1837e-05	2.98707	up	noncoding	ENST00000527695	RP11-652L8.2	GENCODE	233	chr11	-	117886486	117957508	TCACACACTCTGGCCTCTGCAGAACCTAATGTTGGGGTGAGGACTCCATCAGCACCTTGG	intronic antisense	NM_001173552	TMPRSS4	transmembrane protease serine 4 isoform 5	+	117947726	117990556	4.47531	2.89658
ASHGA5P021191	6.56e-08	3.1837e-05	2.98707	up	noncoding	ENST00000527695	RP11-652L8.2	GENCODE	233	chr11	-	117886486	117957508	TCACACACTCTGGCCTCTGCAGAACCTAATGTTGGGGTGAGGACTCCATCAGCACCTTGG	intronic antisense	NM_019894	TMPRSS4	transmembrane protease serine 4 isoform 1	+	117947726	117990556	4.47531	2.89658
ASHGA5P058631	0.028614	0.0745339	2.98245	up	noncoding	uc011hzv.2	HLA-DQB	UCSC_knowngene	645	chr6_mcf_hap5	-	3961838	3964231	GTGGAGTGGCGGCTCCTGCACTGACTCCTGAGACTATTTTAACTGGGATTGGTTATCACT	intergenic							6.71905	5.14255
ASHGA5P055367	0.0297331	0.0761016	2.97883	up	noncoding	ENST00000552269	RP11-493L12.2	GENCODE	673	chr12	-	47599680	47610191	TGGCTCTTATTGTTCTTGCTGGTGTGGTATGTTCACGGCTGAAAAGATGGTCAGAAGGGG	natural antisense	NM_138371	PCED1B	protein FAM113B	+	47610051	47630443	5.43325	3.85851
ASHGA5P028495	0.0355833	0.0837379	2.97741	up	noncoding	TCONS_00010587	XLOC_005110	LincRNAs identified by Cabili et al	982	chr5	-	180257007	180258290	AGATGGAGAGACCAGTTGATCGGTCACACAAGCTGTTCCACGATAATTCTTGTGTCAGAA	intergenic							6.16984	4.59578
ASHGA5P015549	0.00901215	0.0379457	2.97363	up	noncoding	uc003uiq.4	TP53TG1	UCSC_knowngene	470	chr7	-	86954663	86974831	GCCCACGAAGGTTTAACCACCAAGGACTCTGAGAGCTGGCAGGTCTGAGTAACCCTGGTA	bidirectional	NM_001143935	CROT	peroxisomal carnitine O-octanoyltransferase isoform 1	+	86974950	87029112	7.24635	5.67413
ASHGA5P015549	0.00901215	0.0379457	2.97363	up	noncoding	uc003uiq.4	TP53TG1	UCSC_knowngene	470	chr7	-	86954663	86974831	GCCCACGAAGGTTTAACCACCAAGGACTCTGAGAGCTGGCAGGTCTGAGTAACCCTGGTA	bidirectional	NM_001243745	CROT	peroxisomal carnitine O-octanoyltransferase isoform 3	+	86974950	86989425	7.24635	5.67413
ASHGA5P015549	0.00901215	0.0379457	2.97363	up	noncoding	uc003uiq.4	TP53TG1	UCSC_knowngene	470	chr7	-	86954663	86974831	GCCCACGAAGGTTTAACCACCAAGGACTCTGAGAGCTGGCAGGTCTGAGTAACCCTGGTA	bidirectional	NM_021151	CROT	peroxisomal carnitine O-octanoyltransferase isoform 2	+	86974950	87029112	7.24635	5.67413
ASHGA5P022034	0.037708	0.0864449	2.9726	up	noncoding	ENST00000547626	RP11-493L12.2	GENCODE	420	chr12	-	47599680	47603157	TTGGGATTACAGCAGGCTGAGGAATTACCAAGGAGGCAGGAGGTGGAGCAAAACACACCA	intronic antisense	ENST00000546455	PCED1B	PC-esterase domain containing 1B [Source:HGNC Symbol;Acc:28255]	+	47473385	47630443	6.42595	4.85422
ASHGA5P019674	0.00235973	0.0178792	2.97028	up	noncoding	uc001zyi.3	BX537481	UCSC_knowngene	2286	chr15	+	50647663	50650503	CTGTTCTGCGGGGCGTCTGGGCATGGCTTTCCCAACCTAGTAACTGCAACTTTTAGCATC	bidirectional	NM_002041	GABPB1	GA-binding protein subunit beta-1 isoform gamma 1	-	50578076	50647605	5.79037	4.21978
ASHGA5P019674	0.00235973	0.0178792	2.97028	up	noncoding	uc001zyi.3	BX537481	UCSC_knowngene	2286	chr15	+	50647663	50650503	CTGTTCTGCGGGGCGTCTGGGCATGGCTTTCCCAACCTAGTAACTGCAACTTTTAGCATC	bidirectional	NM_005254	GABPB1	GA-binding protein subunit beta-1 isoform beta 1	-	50569388	50647605	5.79037	4.21978
ASHGA5P019674	0.00235973	0.0178792	2.97028	up	noncoding	uc001zyi.3	BX537481	UCSC_knowngene	2286	chr15	+	50647663	50650503	CTGTTCTGCGGGGCGTCTGGGCATGGCTTTCCCAACCTAGTAACTGCAACTTTTAGCATC	bidirectional	NM_016654	GABPB1	GA-binding protein subunit beta-1 isoform beta 2	-	50569388	50647605	5.79037	4.21978
ASHGA5P019674	0.00235973	0.0178792	2.97028	up	noncoding	uc001zyi.3	BX537481	UCSC_knowngene	2286	chr15	+	50647663	50650503	CTGTTCTGCGGGGCGTCTGGGCATGGCTTTCCCAACCTAGTAACTGCAACTTTTAGCATC	bidirectional	NM_016655	GABPB1	GA-binding protein subunit beta-1 isoform gamma 2	-	50578076	50647605	5.79037	4.21978
ASHGA5P019674	0.00235973	0.0178792	2.97028	up	noncoding	uc001zyi.3	BX537481	UCSC_knowngene	2286	chr15	+	50647663	50650503	CTGTTCTGCGGGGCGTCTGGGCATGGCTTTCCCAACCTAGTAACTGCAACTTTTAGCATC	bidirectional	NM_181427	GABPB1	GA-binding protein subunit beta-1 isoform gamma 2	-	50578076	50647605	5.79037	4.21978
ASHGA5P033548	0.027644	0.0730598	2.963	up	noncoding	ENST00000579713	RP11-403A21.2	GENCODE	817	chr18	-	21574176	21595303	GCTCTCACACAAAGGTTTTGGAAATACAGACTGATTTCCTTTGGTTACTAAAACTGATTT	intronic antisense	NM_001135993	TTC39C	tetratricopeptide repeat protein 39C isoform 1	+	21594383	21715574	5.63579	4.06872
ASHGA5P033548	0.027644	0.0730598	2.963	up	noncoding	ENST00000579713	RP11-403A21.2	GENCODE	817	chr18	-	21574176	21595303	GCTCTCACACAAAGGTTTTGGAAATACAGACTGATTTCCTTTGGTTACTAAAACTGATTT	intronic antisense	NM_001243425	TTC39C	tetratricopeptide repeat protein 39C isoform 3	+	21594383	21600262	5.63579	4.06872
ASHGA5P033548	0.027644	0.0730598	2.963	up	noncoding	ENST00000579713	RP11-403A21.2	GENCODE	817	chr18	-	21574176	21595303	GCTCTCACACAAAGGTTTTGGAAATACAGACTGATTTCCTTTGGTTACTAAAACTGATTT	intronic antisense	NM_153211	TTC39C	tetratricopeptide repeat protein 39C isoform 2	+	21572736	21715574	5.63579	4.06872
ASHGA5P013224	0.020627	0.0617538	2.96161	up	noncoding	ENST00000391394	RP11-551L14.1	GENCODE	1058	chr12	-	31264592	31270405	TACGAAAAAGAAGAATATGCCCTAGCTTTTTACCACATCAACAGTAGTTCAGTTTCCGAG	intergenic							5.72428	4.1579
ASHGA5P028426	0.0194036	0.0598234	2.96107	up	noncoding	ENST00000434601	LINC00422	GENCODE	1179	chr13	-	21877650	21922860	GCCTACAGCCTAAATTTTCAAAAACAAGTTAATGCCAGAATATAAACTCCGTGAAGTAAC	intergenic							5.46765	3.90153
ASHGA5P005139	1.97336e-05	0.00139717	2.96031	up	noncoding	NR_027254	LOC388387	RefSeq	1844	chr17	-	41026690	41050751	CACATACTGGACGGGGTTTCACCATCTGCTGGGACGGGACACCCTCTCTTCTTGATCTCA	intergenic							4.77986	3.21412
ASHGA5P022776	6.6506e-07	0.000191641	2.95761	up	noncoding	ENST00000562574	RP11-830F9.5	GENCODE	557	chr16	+	88947664	88950123	GCCCGTGAGAGCTCCAGGACTGAAGCCGCAGAGGCCACTCCCACAGGTCACCAGAAACTA	natural antisense	NM_005187	CBFA2T3	protein CBFA2T3 isoform 1	-	88941262	89043504	4.70809	3.14366
ASHGA5P022776	6.6506e-07	0.000191641	2.95761	up	noncoding	ENST00000562574	RP11-830F9.5	GENCODE	557	chr16	+	88947664	88950123	GCCCGTGAGAGCTCCAGGACTGAAGCCGCAGAGGCCACTCCCACAGGTCACCAGAAACTA	natural antisense	NM_175931	CBFA2T3	protein CBFA2T3 isoform 2	-	88941262	89007608	4.70809	3.14366
ASHGA5P047976	0.000107442	0.00358071	2.9557	up	noncoding	ENST00000532874	NAV2-AS4	GENCODE	1181	chr11	-	19532436	19541443	CATCACGAAGCTGTATGCAAATAAATATCGTGTAACTCCAGCCCTTTTTGAGTTTATAAA	intronic antisense	NM_001111018	NAV2	neuron navigator 2 isoform 3	+	19372270	20143147	6.33623	4.77273
ASHGA5P004440	0.00107104	0.0119645	2.95166	up	noncoding	ENST00000292369	GATS	pseudogene	3522	chr7	-	99798280	99869830	TAAAAATCAAGGGGCCTTGGTGTACCTTGTTGTAGTGTTTGAAAACATCTGAGGCTGCAT								4.52443	2.9629
ASHGA5P030921	0.030149	0.0767152	2.94973	up	noncoding	ENST00000576810	RP11-462G12.1	GENCODE	1394	chr16	-	3997609	4000445	CCGTGTATATTCCTTGGTAATCGTTGAATTTTAAGCCATATGAATGCATTGTCTACTCAA	intergenic							5.88734	4.32676
ASHGA5P050711	0.000101572	0.00351105	2.94831	up	noncoding	ENST00000447538	HOXD-AS1	GENCODE	558	chr2	-	177041107	177042812	AGGGGCCCGGGGCGCCCTGAAACGGGGTCCACGTCAGCCCGCTCCCGAGCGTGTCCTCAG	intergenic							4.81942	3.25953
ASHGA5P018311	0.000372444	0.0069264	2.9479	up	noncoding	ENST00000451837	GUSBP11	GENCODE	3234	chr22	-	23980673	24059508	ATTTTGCCGATTTCATGACTAACCAGTGTTCCTGCTCCAGCGTGGCTCCTGGACTGGCGC	natural antisense	NM_153615	RGL4	ral-GDS-related protein precursor	+	24033047	24041363	5.80884	4.24916
ASHGA5P028719	0.0446826	0.0958851	2.94164	up	noncoding	uc001ela.4	LOC728875	UCSC_knowngene	1257	chr1	-	144480744	144521009	AGACGTACAGGCGGGATCTTCTGGAAGTGAGAATTGTTTTTGTTTGTTTATCTATTGTAG	natural antisense	ENST00000538264	AL592284.2	Uncharacterized protein [Source:UniProtKB/TrEMBL;Acc:F5H305]	+	144339737	144521058	6.91018	5.35355
ASHGA5P033349	5.08705e-06	0.000642571	2.93892	up	noncoding	ENST00000583712	RP11-449L23.3	GENCODE	1562	chr17	+	71515984	71517546	AGACTGGGCTGCTCCCTCTGAGCATCTAGAAACTTCCCCAGAAGCAGAAGCTTCAGGCAG	intronic antisense	NM_001144952	SDK2	protein sidekick-2 precursor	-	71330522	71640227	6.34861	4.79332
ASHGA5P049901	0.0436455	0.0949188	2.93762	up	noncoding	ENST00000519013	RP11-62H7.2	pseudogene	301	chr8	+	8819266	8819567	GGCCGCCAGAATATCCACTTCTCAGAGAAGTGGGACTTTACCAAGTTCAGTGTGGATGAA								8.39674	6.84209
ASHGA5P015991	6.93191e-06	0.00077011	2.93685	up	noncoding	ENST00000425595	HOTAIR	GENCODE	572	chr12	-	54357585	54360414	TTCTTTGCTAGCTGCCCGGGTCCTGCTCCGCTTCGCAGTGGAATGGAACGGATTTAGAAG	intergenic							5.53684	3.98257
ASHGA5P044023	0.0199923	0.0608212	2.93584	up	noncoding	NR_038926	PRKAG2-AS1	RefSeq	808	chr7	+	151574126	151576308	CGTTCGTGCATAAATGTAATCCTCGGCCGCAGAATAAACCAGCTCGGAGCCTGCAGCTGG	natural antisense	NM_016203	PRKAG2	5'-AMP-activated protein kinase subunit gamma-2 isoform a	-	151253200	151574316	5.12233	3.56855
ASHGA5P042947	6.06728e-06	0.00072328	2.92801	up	noncoding	ENST00000412197	AC091705.1	GENCODE	209	chr7	-	25587381	25590682	GAAAAAGCTATTATTGAACTTCCCAGGAATCTCCCAGGCTGAGAAGTCTACACAATATTC	intergenic							4.77631	3.22639
ASHGA5P023367	2.28278e-05	0.00150825	2.92495	up	noncoding	ENST00000579383	SNHG15	GENCODE	731	chr7	-	45022624	45026255	ACAGCAACTCCTTTGCAAGATGCCCCGTGTCCATGAAACTGGGAGGCGACCGTGTTAGCT	intergenic							5.56407	4.01566
ASHGA5P030255	0.00401418	0.0242085	2.92335	up	noncoding	ENST00000558334	RP11-617F23.1	GENCODE	1168	chr15	-	90617746	90625439	AAATAAGTTAGAATGGAATTTGTCCAGGAGTTTCCAAGTCACCCGAGAGGCTGTGCACCT	natural antisense	NM_198526	ZNF710	zinc finger protein 710	+	90544751	90625432	7.53265	5.98503
ASHGA5P027473	0.00825157	0.0360264	2.91957	up	noncoding	ENST00000424517	RP4-717I23.3	GENCODE	262	chr1	-	93730232	93790207	CTGTCCTGCTGATGAAGTCTACGTTCATTCAGGGCCTGCTGTGGAAGACCAGCCCCAAAG	natural antisense	NM_206886	CCDC18	coiled-coil domain-containing protein 18	+	93646280	93744287	6.31194	4.76618
ASHGA5P040398	0.0115246	0.044113	2.91491	up	noncoding	ENST00000501714	CTD-2653M23.2	GENCODE	2589	chr5	-	36864526	36876759	CACCGTTCTCTATTAAGTTTGTGTAAATTAAAAAGGGGCTATTTTCGGTAAAAAGTGCAG	bidirectional	NM_015384	NIPBL	nipped-B-like protein isoform B	+	36876860	37065921	6.42842	4.88497
ASHGA5P040398	0.0115246	0.044113	2.91491	up	noncoding	ENST00000501714	CTD-2653M23.2	GENCODE	2589	chr5	-	36864526	36876759	CACCGTTCTCTATTAAGTTTGTGTAAATTAAAAAGGGGCTATTTTCGGTAAAAAGTGCAG	bidirectional	NM_133433	NIPBL	nipped-B-like protein isoform A	+	36876860	37065921	6.42842	4.88497
ASHGA5P044430	0.016741	0.0552936	2.90362	up	noncoding	ENST00000521696	RP11-410L14.2	GENCODE	380	chr8	-	100008990	100025272	CGCTGGTTCGATGCAGAGGAAGAAACCACACCTAGCACGTAAAGCCCTGAAAAAATAGAG	bidirectional	NM_015243	VPS13B	vacuolar protein sorting-associated protein 13B isoform 3	+	100025493	100222015	6.29778	4.75993
ASHGA5P044430	0.016741	0.0552936	2.90362	up	noncoding	ENST00000521696	RP11-410L14.2	GENCODE	380	chr8	-	100008990	100025272	CGCTGGTTCGATGCAGAGGAAGAAACCACACCTAGCACGTAAAGCCCTGAAAAAATAGAG	bidirectional	NM_017890	VPS13B	vacuolar protein sorting-associated protein 13B isoform 5	+	100025493	100889814	6.29778	4.75993
ASHGA5P044430	0.016741	0.0552936	2.90362	up	noncoding	ENST00000521696	RP11-410L14.2	GENCODE	380	chr8	-	100008990	100025272	CGCTGGTTCGATGCAGAGGAAGAAACCACACCTAGCACGTAAAGCCCTGAAAAAATAGAG	bidirectional	NM_152564	VPS13B	vacuolar protein sorting-associated protein 13B isoform 1	+	100025493	100889814	6.29778	4.75993
ASHGA5P044430	0.016741	0.0552936	2.90362	up	noncoding	ENST00000521696	RP11-410L14.2	GENCODE	380	chr8	-	100008990	100025272	CGCTGGTTCGATGCAGAGGAAGAAACCACACCTAGCACGTAAAGCCCTGAAAAAATAGAG	bidirectional	NM_181661	VPS13B	vacuolar protein sorting-associated protein 13B isoform 4	+	100025493	100133987	6.29778	4.75993
ASHGA5P031623	0.0344271	0.0822202	2.90222	up	noncoding	uc021tfl.1	AF063596	UCSC_knowngene	1005	chr16	+	24551499	24552504	CTAACTTATTTTCCATCAGGAGGGCAGGAGAGCCTGTGCAAAGCTTGTTTGTTCAATCAG	exon sense-overlapping	NM_006910	RBBP6	E3 ubiquitin-protein ligase RBBP6 isoform 1	+	24550907	24584183	7.60552	6.06836
ASHGA5P031623	0.0344271	0.0822202	2.90222	up	noncoding	uc021tfl.1	AF063596	UCSC_knowngene	1005	chr16	+	24551499	24552504	CTAACTTATTTTCCATCAGGAGGGCAGGAGAGCCTGTGCAAAGCTTGTTTGTTCAATCAG	exon sense-overlapping	NM_018703	RBBP6	E3 ubiquitin-protein ligase RBBP6 isoform 2	+	24550907	24584183	7.60552	6.06836
ASHGA5P031623	0.0344271	0.0822202	2.90222	up	noncoding	uc021tfl.1	AF063596	UCSC_knowngene	1005	chr16	+	24551499	24552504	CTAACTTATTTTCCATCAGGAGGGCAGGAGAGCCTGTGCAAAGCTTGTTTGTTCAATCAG	exon sense-overlapping	NM_032626	RBBP6	E3 ubiquitin-protein ligase RBBP6 isoform 3	+	24550907	24560722	7.60552	6.06836
ASHGA5P057583	0.000537938	0.00845031	2.90009	up	noncoding	TCONS_00019383	XLOC_009207	LincRNAs identified by Cabili et al	346	chr11	+	72911524	72916328	ACACTTTGGGGCTGGCACCCAGCACTGTGCTATCCTAGGAAGAAACAGCTAAATCCCAAT	intergenic							5.87448	4.33838
ASHGA5P026950	0.0258326	0.0704531	2.89897	up	noncoding	ENST00000540226	RP11-598F7.3	GENCODE	586	chr12	-	215689	221016	CTGGAAGTATTATCTTTAGTTAGGGGTATTTCCTTAACTAATAAAGCCTAGCATTGCTGT	intronic antisense	NM_001170738	IQSEC3	IQ motif and SEC7 domain-containing protein 3 isoform 1	+	176048	287625	5.5702	4.03465
ASHGA5P026950	0.0258326	0.0704531	2.89897	up	noncoding	ENST00000540226	RP11-598F7.3	GENCODE	586	chr12	-	215689	221016	CTGGAAGTATTATCTTTAGTTAGGGGTATTTCCTTAACTAATAAAGCCTAGCATTGCTGT	intronic antisense	NM_015232	IQSEC3	IQ motif and SEC7 domain-containing protein 3 isoform 2	+	186541	280494	5.5702	4.03465
ASHGA5P017500	4.3312e-05	0.00213572	2.8963	up	noncoding	ENST00000442417	AC093818.1	GENCODE	950	chr2	-	173345567	173421257	TACTGATGAACAGAAAAGATTTTCTTGGAATTCCTATGCCCCTGGCCTTGACTCTGGAGC	intronic antisense	NM_000210	ITGA6	integrin alpha-6 isoform b precursor	+	173292313	173371181	6.3588	4.82459
ASHGA5P017500	4.3312e-05	0.00213572	2.8963	up	noncoding	ENST00000442417	AC093818.1	GENCODE	950	chr2	-	173345567	173421257	TACTGATGAACAGAAAAGATTTTCTTGGAATTCCTATGCCCCTGGCCTTGACTCTGGAGC	intronic antisense	NM_001079818	ITGA6	integrin alpha-6 isoform a precursor	+	173292313	173371181	6.3588	4.82459
ASHGA5P017500	4.3312e-05	0.00213572	2.8963	up	noncoding	ENST00000442417	AC093818.1	GENCODE	950	chr2	-	173345567	173421257	TACTGATGAACAGAAAAGATTTTCTTGGAATTCCTATGCCCCTGGCCTTGACTCTGGAGC	natural antisense	NM_002610	PDK1	pyruvate dehydrogenase kinase, isozyme 1	+	173420778	173463862	6.3588	4.82459
ASHGA5P042206	0.0294868	0.0758289	2.89458	up	noncoding	ENST00000534160	RP1-80B9.2	GENCODE	720	chr6	+	2306526	2352936	AGTCCCAAGTCTGCAAGAAGGGGGATCTTTTCTTGAAAACCTACAGTGCTAATAATTGTC	intergenic							6.59097	5.05762
ASHGA5P045086	0.00199325	0.0165285	2.89296	up	noncoding	ENST00000528668	CTD-3232M19.2	pseudogene	3778	chr8	+	145462708	145485883	CTGGGGACCAAACCCAAGCCCTTCAGTGAGGGATGTGCCCAATAAACTCATCTGCTCCCA								8.05544	6.52289
ASHGA5P033254	7.34331e-05	0.00288863	2.88999	up	noncoding	AA158161		LincRNAs identified by Khalil et al	452	chr11	+	37649936	37650185	ACCGCCCTTTTCAATTGCTATCTTTTGAAAGGCACCAGTATGTGTTTTAGATTGATTTCC	intergenic							7.19159	5.66052
ASHGA5P036593	0.0219878	0.0637176	2.88255	up	noncoding	ENST00000416103	AC093642.5	pseudogene	380	chr2	+	243037044	243061208	TTAAATAGCGAAGATGGAGAAATACTCAATAATGAAGAGCATGAATATGCATCCAAAAAA								4.94871	3.42137
ASHGA5P033981	1.38753e-05	0.0011343	2.88165	up	noncoding	ENST00000455966	RP1-224A6.3	GENCODE	615	chr1	-	22350486	22351461	ATGCCGCTTGAGTCCCAGAGCAACTCCAATTTCATAGGCACATAAATTTATGTGAAAGTA	intergenic							5.54669	4.01979
ASHGA5P041254	0.000273318	0.00589626	2.88097	up	noncoding	ENST00000508206	CTD-2154I11.1	GENCODE	725	chr5	+	94993765	95020477	GAGTAAGAAAATCTCACCCTGCAGCACTTACATTATGACCTTATAATATTTTGGTTTGTG	intronic antisense	NM_031952	SPATA9	spermatogenesis-associated protein 9	-	94994019	95018714	5.56358	4.03703
ASHGA5P020328	0.000330084	0.00653156	2.87999	up	noncoding	uc003iwy.1	BC016366	UCSC_knowngene	632	chr4	-	185765736	185776806	CACCTGCCAGCAGATGCCCCTGCAGGCCATCTCTCCAGGCTCAGGAACCTAAAGAAGAAT	intergenic							5.04744	3.52138
ASHGA5P031693	0.0177011	0.0569909	2.87647	up	noncoding	ENST00000569782	RP11-452L6.7	GENCODE	647	chr16	+	31519791	31520569	GCATCTTCACTCCGAAGCAGAAATTTGCCAAAAAAGCATCCTCTTTTTATCAGAAAATAA	natural antisense	ENST00000564807	C16orf58	chromosome 16 open reading frame 58 [Source:HGNC Symbol;Acc:25848]	-	31508199	31520630	5.81589	4.29159
ASHGA5P056294	0.0207476	0.0619275	2.86979	up	noncoding	TCONS_00001898	XLOC_001286	LincRNAs identified by Cabili et al	1334	chr1	-	244210525	244212010	ACAAAGACGTGGAAATGTCTGCCGTCAAGAAATTGGAAATCGTATCGAGAACCCAGACTG	intergenic							5.32077	3.79982
ASHGA5P052084	0.00617805	0.0306939	2.86867	up	noncoding	NR_033939	LOC100129858	RefSeq	2017	chr4	-	141204879	141294546	GCGGCTCATCAGGTCTATCAGGAAACCTGAGAATTGGAGTGAGAATCCCAGTGTGGAAAA	intronic antisense	NM_001153446	SCOC	short coiled-coil protein isoform 4	+	141264596	141303710	4.8847	3.36432
ASHGA5P052084	0.00617805	0.0306939	2.86867	up	noncoding	NR_033939	LOC100129858	RefSeq	2017	chr4	-	141204879	141294546	GCGGCTCATCAGGTCTATCAGGAAACCTGAGAATTGGAGTGAGAATCCCAGTGTGGAAAA	intronic antisense	NM_001153585	SCOC	short coiled-coil protein isoform 4	+	141264614	141303710	4.8847	3.36432
ASHGA5P052084	0.00617805	0.0306939	2.86867	up	noncoding	NR_033939	LOC100129858	RefSeq	2017	chr4	-	141204879	141294546	GCGGCTCATCAGGTCTATCAGGAAACCTGAGAATTGGAGTGAGAATCCCAGTGTGGAAAA	intronic antisense	NM_001153635	SCOC	short coiled-coil protein isoform 5	+	141264596	141303710	4.8847	3.36432
ASHGA5P052084	0.00617805	0.0306939	2.86867	up	noncoding	NR_033939	LOC100129858	RefSeq	2017	chr4	-	141204879	141294546	GCGGCTCATCAGGTCTATCAGGAAACCTGAGAATTGGAGTGAGAATCCCAGTGTGGAAAA	intronic antisense	NM_001153690	SCOC	short coiled-coil protein isoform 6	+	141264614	141303710	4.8847	3.36432
ASHGA5P052084	0.00617805	0.0306939	2.86867	up	noncoding	NR_033939	LOC100129858	RefSeq	2017	chr4	-	141204879	141294546	GCGGCTCATCAGGTCTATCAGGAAACCTGAGAATTGGAGTGAGAATCCCAGTGTGGAAAA	intronic antisense	NM_032547	SCOC	short coiled-coil protein isoform 4	+	141178439	141303710	4.8847	3.36432
ASHGA5P027794	6.396e-08	3.1837e-05	2.867	up	noncoding	BX096636		LincRNAs identified by Khalil et al	670	chrX	+	67791644	67792306	TAAGGCTAATAATGAGCTTGCAAGGTTAGAAGGGCTGTGTCTCCCTAAAGTCTGCTTTTA	intergenic							4.3787	2.85916
ASHGA5P019575	0.0462535	0.0979642	2.86699	up	noncoding	ENST00000493239	RP11-61L23.2	GENCODE	545	chr7	-	143510551	143533318	TCTTATTGGAGAAGCCGCCTTCCCCGTGATGGTGAATGACAAGGGCCAGGAGGATTCCCT	intergenic							8.07773	6.55819
ASHGA5P026445	0.000510162	0.00821408	2.86491	up	noncoding	ENST00000531311	AP000442.1	GENCODE	601	chr11	+	59387886	59407334	CCTTGCCATGGATAATGTAGAATTTGACTTTTCTCCTATTTATGAGAACAGAAATAGGCT	natural antisense	NM_152716	PATL1	protein PAT1 homolog 1	-	59404191	59436511	5.05844	3.53995
ASHGA5P033061	0.0206011	0.0617162	2.86174	up	noncoding	ENST00000441575	AC069363.1	GENCODE	393	chr17	+	34408991	34417208	GACTAGGGGGCTAAGACCCCTTCTAGAGATAAAAATAAAAGTCTTAAAGAGAAAGACCAA	intronic antisense	NM_002983	CCL3	C-C motif chemokine 3 precursor	-	34415602	34417506	4.32799	2.8111
ASHGA5P022529	3.89507e-05	0.00197343	2.85798	up	noncoding	ENST00000558419	CTD-2008A1.1	GENCODE	424	chr15	+	45118737	45119292	CTCAATGAAGGCACACCAATTCCTCTGCGTAAGGACTTCTGTTCACAATGAATTGTATTA	intergenic							4.11963	2.60463
ASHGA5P027886	0.00179928	0.0156668	2.8544	up	noncoding	ENST00000536131	RP11-625L16.1	GENCODE	670	chr12	+	24857498	24927147	CTTTAATGTTCGTGCCCGTCTCCTTAGTGCTTGATAGAAAGGATGCACTTCTTATGTTAG	intergenic							5.61911	4.10592
ASHGA5P040207	0.0189721	0.0591218	2.85036	up	noncoding	ENST00000503611	RP11-597D13.9	GENCODE	2917	chr4	+	159091903	159124029	CTCAGACCAAAATTGAAAGTCATCTATTGTAACTATGTGTTCTTGGCATCTAAACTCTGT	natural antisense	NM_001031700	FAM198B	protein FAM198B isoform 1	-	159045731	159094202	6.59951	5.08836
ASHGA5P040207	0.0189721	0.0591218	2.85036	up	noncoding	ENST00000503611	RP11-597D13.9	GENCODE	2917	chr4	+	159091903	159124029	CTCAGACCAAAATTGAAAGTCATCTATTGTAACTATGTGTTCTTGGCATCTAAACTCTGT	natural antisense	NM_001128424	FAM198B	protein FAM198B isoform 2	-	159045731	159094202	6.59951	5.08836
ASHGA5P040207	0.0189721	0.0591218	2.85036	up	noncoding	ENST00000503611	RP11-597D13.9	GENCODE	2917	chr4	+	159091903	159124029	CTCAGACCAAAATTGAAAGTCATCTATTGTAACTATGTGTTCTTGGCATCTAAACTCTGT	natural antisense	NM_016613	FAM198B	protein FAM198B isoform 2	-	159045731	159093718	6.59951	5.08836
ASHGA5P023307	0.00850508	0.0367391	2.84587	up	noncoding	ENST00000577889	AC005154.6	GENCODE	426	chr7	-	30590183	30601135	TTATGACCGGTGTCTGCTCCATGGCAGCCTCTTCCTGGGACCAGATCTGAACAGTCTGGA	intergenic							4.79761	3.28874
ASHGA5P035987	0.0339538	0.0816254	2.84478	up	noncoding	uc002std.1	BC046476	UCSC_knowngene	1324	chr2	+	88927346	88931337	CTGCTGCTAAGCAAAATGAGGATTCTGCTAGTGAGGATGAAAGGAAGAATGTGTAATCAG	bidirectional	NM_004836	EIF2AK3	eukaryotic translation initiation factor 2-alpha kinase 3 precursor	-	88856258	88927094	5.31469	3.80637
ASHGA5P017537	4.95044e-05	0.00234092	2.84198	up	noncoding	ENST00000442823	EPB41L4A-AS1	GENCODE	578	chr5	+	111496588	111498021	TACCCTACAGGATGTCCTTGGTGAGGATTTTGAAAATTTGATCTTCACAAGAGTTGCCTG	intergenic							9.12459	7.61769
ASHGA5P045727	0.0154715	0.052799	2.84026	up	noncoding	uc004acc.4	LOC554249	UCSC_knowngene	1355	chr9	+	42018943	42020413	CCTTTGACCTCATTATGGTCCTTTCTAGATCAAATGCTGTTTTCCATGACTGTCTCTGTT	intergenic							5.14703	3.64101
ASHGA5P044811	0.0303631	0.0769684	2.83996	up	noncoding	ENST00000520357	RP11-110G21.1	GENCODE	575	chr8	+	52812274	52825698	GGCGAGCCGGGAAAATATTGCTACTAAGGATCCTAAGCAGTGAACATGCTGTTAATACTT	bidirectional	NM_052937	PCMTD1	protein-L-isoaspartate O-methyltransferase domain-containing protein 1	-	52730139	52811735	5.90491	4.39904
ASHGA5P031757	0.0284874	0.0743931	2.8356	up	noncoding	ENST00000563424	RP11-401P9.4	GENCODE	3441	chr16	+	50679719	50683160	TTTAAAGATGGTGGCAGTGAAACTGGTACATGGGACCTGACTGGGCTTTGTTTGCAACTT	intergenic							5.13088	3.62723
ASHGA5P043447	0.0324884	0.0797591	2.83153	up	noncoding	ENST00000430825	AC005534.9	GENCODE	514	chr7	-	156461645	156469257	CAGTTCGCATAGACTTTTCATGCAGTTGAGTCTAATTTATATTTTACTATCCACTTACCC	natural antisense	NM_001184996	RNF32	RING finger protein 32	+	156433440	156469820	5.38945	3.88788
ASHGA5P043447	0.0324884	0.0797591	2.83153	up	noncoding	ENST00000430825	AC005534.9	GENCODE	514	chr7	-	156461645	156469257	CAGTTCGCATAGACTTTTCATGCAGTTGAGTCTAATTTATATTTTACTATCCACTTACCC	natural antisense	NM_001184997	RNF32	RING finger protein 32	+	156435670	156469820	5.38945	3.88788
ASHGA5P043447	0.0324884	0.0797591	2.83153	up	noncoding	ENST00000430825	AC005534.9	GENCODE	514	chr7	-	156461645	156469257	CAGTTCGCATAGACTTTTCATGCAGTTGAGTCTAATTTATATTTTACTATCCACTTACCC	natural antisense	NM_030936	RNF32	RING finger protein 32	+	156433352	156469820	5.38945	3.88788
ASHGA5P058634	2.1353e-05	0.00144776	2.82968	up	noncoding	uc011mox.1	mir-223	UCSC_knowngene	1690	chrX	+	65235302	65240264	CCACTGACAGGGTCACATCTCCCAGGAAGATCTCACTTCCCCACAGAAGCTCTTGGCCTG	intergenic							5.81615	4.31551
ASHGA5P037008	0.0282993	0.0741118	2.82963	up	noncoding	ENST00000412972	RP11-243J16.7	GENCODE	374	chr20	+	30274018	30304628	CTACCAACTGTTAACTTCTTTTCATTTATCCAAGTTTTGCCAGGTACCACACCAATAAAA	intronic antisense	NM_001191	BCL2L1	bcl-2-like protein 1 isoform 2	-	30252260	30310656	5.09083	3.59021
ASHGA5P037008	0.0282993	0.0741118	2.82963	up	noncoding	ENST00000412972	RP11-243J16.7	GENCODE	374	chr20	+	30274018	30304628	CTACCAACTGTTAACTTCTTTTCATTTATCCAAGTTTTGCCAGGTACCACACCAATAAAA	intronic antisense	NM_138578	BCL2L1	bcl-2-like protein 1 isoform 1	-	30252260	30310656	5.09083	3.59021
ASHGA5P016908	0.0202521	0.0611074	2.82158	up	noncoding	ENST00000435585	BX571672.5	GENCODE	336	chr1	-	143216055	143226395	GCAATCACAGCTAATTTTAAAACATGCACTCTGACAGAAAAGACATCTGAGAAACAAAAC	intergenic							6.27102	4.77452
ASHGA5P043700	0.0198488	0.0604868	2.81803	up	noncoding	ENST00000412772	RP11-134P9.3	GENCODE	775	chr1	+	203256279	203257929	GTGGAAAGAGTGAACATATGTGCAGAATGCTTAATAAACGTGATCTCCTTTTATCTTCAA	intergenic							5.75986	4.26518
ASHGA5P046298	3.63196e-06	0.000512278	2.81483	up	noncoding	ENST00000455986	RP3-327A19.5	GENCODE	810	chrX	-	119055223	119056803	GCCCGCTTGCCTTATATTTTTAAGTGGTTGTTTTTCAAAAGTGTTTAAATAAGGCAGTCA	intergenic							5.49569	4.00264
ASHGA5P027812	0.00227873	0.0176573	2.81329	up	noncoding	NR_026971	A2M-AS1	RefSeq	2187	chr12	+	9217772	9220651	TATGGACTCTCTGAGGTTTGACAGAGTCAGCGGCCCTCTCCAATAAATGTGTTTTTCTAT	natural antisense	NM_000014	A2M	alpha-2-macroglobulin precursor	-	9220303	9268558	6.56351	5.07125
ASHGA5P055366	0.0364734	0.085037	2.81307	up	noncoding	ENST00000548222	RP11-493L12.2	GENCODE	625	chr12	-	47599684	47610032	ACGGCTGAAAAGATGGTCAGAAGGGGAAAGGAGGAAGTGAGAAGAAAGAAACAGGGAAAT	natural antisense	ENST00000546455	PCED1B	PC-esterase domain containing 1B [Source:HGNC Symbol;Acc:28255]	+	47473385	47630443	5.20477	3.71262
ASHGA5P048226	2.40891e-06	0.000411528	2.81199	up	noncoding	ENST00000526951	RP11-867G23.4	GENCODE	453	chr11	-	66044249	66044958	TATACTCAGATCCCACCGCAGCTGGACGGCTCGAGCTGGGAGTGTAGGAAGGGAGAGGAG	natural antisense	NM_030981	RAB1B	ras-related protein Rab-1B	+	66036055	66044963	4.47501	2.98342
ASHGA5P031065	0.00174457	0.015403	2.80935	up	noncoding	ENST00000565800	CTB-134H23.3	GENCODE	121	chr16	-	29118977	29119429	GGGCACCTGTGAATGAATCCTGCGGAGCTGCTAACAGAGCAGACTTACACACACAACATG	intergenic							5.58135	4.09111
ASHGA5P023678	7.66604e-06	0.00083163	2.80795	up	noncoding	HMlincRNA1452+	HMlincRNA1452	LincRNAs identified by Khalil et al	4380	chr4	+	178294426	178298806	AACACACTGGTACCCTATCTGCAGCCTAACGTTTTATATTCGGCTCCTAACATGTTCTGG	intergenic							4.36033	2.87081
ASHGA5P047024	0.0421359	0.0926155	2.80756	up	noncoding	DB308427		LincRNAs identified by Khalil et al	530	chr19	+	30528701	30529228	TTCCTGCAACATCAGCAGTTCAGAATGTTCTGATTAATCCATCATTAATTGGGTCCAAAA	intergenic							6.91035	5.42103
ASHGA5P040375	0.0281235	0.0739581	2.80698	up	noncoding	ENST00000504053	RP11-5N11.1	pseudogene	364	chr5	-	31725645	31726009	GCCTGCATCTCATACCAAAACTAGAGGCATCTCTAAAAACAGATTCCAAAGCACATTACA								5.7094	4.22039
ASHGA5P046081	0.0225225	0.0645771	2.8033	up	noncoding	uc011mfp.1	AK127309	UCSC_knowngene	3067	chrUn_gl000219	-	51811	54878	CCACATAAAAGGAAGGGACCAAAAATATCTTAAAGAAATACTTCACGATGGAAGTGATGT	intergenic							5.66336	4.17623
ASHGA5P047748	5.701e-08	3.0923e-05	2.80271	up	noncoding	TCONS_00013620	XLOC_006283	LincRNAs identified by Cabili et al	256	chr7	+	144854105	144857237	AACTCTCAAGCTGTCCCTGCTGCTCTGGAGGCAAGATGTCACTGAGGTGACTGTTGCCCA	intergenic							6.29059	4.80377
ASHGA5P037987	0.0321916	0.0793687	2.79288	up	noncoding	ENST00000416406	RP3-508I15.14	GENCODE	500	chr22	+	39135007	39145046	CTGGGCAGGTCTTAGAGTGATGGGACAATTTTGACTGAATTTTACTGATGTTATTAAAAA	natural antisense	NM_001199579	SUN2	SUN domain-containing protein 2 isoform a	-	39130718	39152024	5.65904	4.17729
ASHGA5P037987	0.0321916	0.0793687	2.79288	up	noncoding	ENST00000416406	RP3-508I15.14	GENCODE	500	chr22	+	39135007	39145046	CTGGGCAGGTCTTAGAGTGATGGGACAATTTTGACTGAATTTTACTGATGTTATTAAAAA	natural antisense	NM_001199580	SUN2	SUN domain-containing protein 2 isoform b	-	39130718	39151467	5.65904	4.17729
ASHGA5P037987	0.0321916	0.0793687	2.79288	up	noncoding	ENST00000416406	RP3-508I15.14	GENCODE	500	chr22	+	39135007	39145046	CTGGGCAGGTCTTAGAGTGATGGGACAATTTTGACTGAATTTTACTGATGTTATTAAAAA	natural antisense	NM_015374	SUN2	SUN domain-containing protein 2 isoform b	-	39130718	39152024	5.65904	4.17729
ASHGA5P017840	0.0117433	0.0446351	2.79237	up	noncoding	ENST00000446309	AC005076.5	GENCODE	338	chr7	-	86780755	86781736	GCGAAAAAAGGAACCAAAGAGAAGTGAAGGAATGTGTCCAAGGGCTCCCAAGTTGGCGGT	natural antisense	NM_001142326	DMTF1	cyclin-D-binding Myb-like transcription factor 1 isoform b	+	86781676	86825648	5.06497	3.58348
ASHGA5P017840	0.0117433	0.0446351	2.79237	up	noncoding	ENST00000446309	AC005076.5	GENCODE	338	chr7	-	86780755	86781736	GCGAAAAAAGGAACCAAAGAGAAGTGAAGGAATGTGTCCAAGGGCTCCCAAGTTGGCGGT	natural antisense	NM_001142327	DMTF1	cyclin-D-binding Myb-like transcription factor 1 isoform a	+	86781676	86825648	5.06497	3.58348
ASHGA5P054667	0.00571526	0.0294087	2.78648	up	noncoding	ENST00000447298	H19	GENCODE	524	chr11	-	2016917	2017697	CTCCCCACAGCCAGGTCTCCAGCTGGGGTGGACGTGCCCACCAGCTGCCGAAGGCCAAGA	intergenic							5.50419	4.02575
ASHGA5P019465	0.00606721	0.0303723	2.78414	up	noncoding	NR_033723	DNAJC19	RefSeq	1421	chr3	-	180701497	180707562	TATTATAGAGCCCTACTGCCAATAAAGGGAAAATAAGAGATGCTCATCGACGAATTATGC	exon sense-overlapping	NM_001190233	DNAJC19	mitochondrial import inner membrane translocase subunit TIM14 isoform 2	-	180701497	180707306	7.3464	5.86917
ASHGA5P019465	0.00606721	0.0303723	2.78414	up	noncoding	NR_033723	DNAJC19	RefSeq	1421	chr3	-	180701497	180707562	TATTATAGAGCCCTACTGCCAATAAAGGGAAAATAAGAGATGCTCATCGACGAATTATGC	exon sense-overlapping	NM_145261	DNAJC19	mitochondrial import inner membrane translocase subunit TIM14 isoform 1	-	180701497	180707562	7.3464	5.86917
ASHGA5P037222	9.885e-08	4.5575e-05	2.78156	up	noncoding	ENST00000452500	AP000472.3	GENCODE	530	chr21	-	23305634	23348000	GAATGATGCCCCAAATGTTGATATGAATTACATAGTGTGTCCTGCTGTGAGCATCAGAAG	intergenic							4.30053	2.82464
ASHGA5P036909	0.0101269	0.0409923	2.78084	up	noncoding	ENST00000418246	RP4-545L17.7	GENCODE	326	chr20	+	1146923	1160596	ATACTATGGAGGAGAAGGTGATCAAGGCCTGCATCATGCCCACAGAAATACAATAAAGCC	exon sense-overlapping	NM_006814	PSMF1	proteasome inhibitor PI31 subunit	+	1099239	1148426	5.68261	4.20709
ASHGA5P036909	0.0101269	0.0409923	2.78084	up	noncoding	ENST00000418246	RP4-545L17.7	GENCODE	326	chr20	+	1146923	1160596	ATACTATGGAGGAGAAGGTGATCAAGGCCTGCATCATGCCCACAGAAATACAATAAAGCC	exon sense-overlapping	NM_178578	PSMF1	proteasome inhibitor PI31 subunit	+	1093905	1148426	5.68261	4.20709
ASHGA5P054777	0.0273351	0.072639	2.7796	up	noncoding	ENST00000425496	RP4-669L17.10	GENCODE	2661	chr1	+	324755	328453	TATAAATCCCAAAATATTGAATTTTGGAATATTTCCACCATTATGTAAATATTTTGATAG	intergenic							7.3592	5.88432
ASHGA5P058110	5.95e-09	7.838e-06	2.77941	up	noncoding	TCONS_00026596	XLOC_012622	LincRNAs identified by Cabili et al	428	chr18	+	8974492	8980727	CAATGCCCAGGAAATGAATACCCGCCTCAGGGCCACAGCCATAATGGGACAAAGTGCTCA	intergenic							4.16021	2.68543
ASHGA5P017654	3.66667e-06	0.000512278	2.77936	up	noncoding	ENST00000444220	GUSBP11	GENCODE	614	chr22	-	24052031	24059514	GTGCCCACTTCTATGCCATCGTGCTACGCAGGACTGCTGTGGTCTCTGCTTCTATACACG	intergenic							5.26834	3.79359
ASHGA5P045829	4.77846e-06	0.000620594	2.7776	up	noncoding	ENST00000446878	RP11-526D8.7	GENCODE	1719	chr9	+	95646466	95648440	TAATTCCCCATGGTCTTCCCTGAAGAAACATACACTCAGCCTCCTGTGAGATCCCAGGCC	intergenic							5.76987	4.29603
ASHGA5P035515	0.028236	0.0740231	2.77583	up	noncoding	TCONS_00005168	XLOC_002128	LincRNAs identified by Cabili et al	1334	chr2	-	64747475	64751427	ATGGGAGTATCAATTGCTTTGTGGTTATGCTGGATTTTGTGTTATTGCTCAGTCACTAAA	intergenic							5.3782	3.90528
ASHGA5P046961	4.18e-09	7.408e-06	2.77557	up	noncoding	uc009xrv.1	BC128552	UCSC_knowngene	1439	chr10	-	80928942	80930381	ATTATTTATAGGTTCTAGTGCATCAAAGTCCTCCTGGCTCAATCCTTGACCACGCTGGAG	intronic antisense	NM_020338	ZMIZ1	zinc finger MIZ domain-containing protein 1	+	80828791	81076285	4.50374	3.03096
ASHGA5P044240	0.0345435	0.0823874	2.77235	up	noncoding	ENST00000522190	RP11-503E24.2	GENCODE	708	chr8	-	42392671	42393447	GAATTCTAGAACAGTGATTCACCAGGACATAGGACAATGATTGCTTGTTACTAATTTAGT	intron sense-overlapping	NM_001257181	SLC20A2	sodium-dependent phosphate transporter 2	-	42273979	42396655	4.89053	3.41943
ASHGA5P044240	0.0345435	0.0823874	2.77235	up	noncoding	ENST00000522190	RP11-503E24.2	GENCODE	708	chr8	-	42392671	42393447	GAATTCTAGAACAGTGATTCACCAGGACATAGGACAATGATTGCTTGTTACTAATTTAGT	intron sense-overlapping	NM_006749	SLC20A2	sodium-dependent phosphate transporter 2	-	42273979	42397356	4.89053	3.41943
ASHGA5P032046	0.0177877	0.0570904	2.76873	up	noncoding	ENST00000569162	AC137934.1	GENCODE	654	chr16	+	90282233	90289074	TCATGCTTTCTTCTGCCGTATCCATCGTTCAAACAAACATGAGGCAAAGCTAGACACATT	intergenic							6.34259	4.87336
ASHGA5P044812	0.0193439	0.0597155	2.76792	up	noncoding	ENST00000521612	RP11-110G21.1	GENCODE	423	chr8	+	52812293	52824289	GACTGGTATTCTGTTATCCACAAGAGTAAATGTTCCCAAATAAACAAAACTGGGATATGA	bidirectional	NM_052937	PCMTD1	protein-L-isoaspartate O-methyltransferase domain-containing protein 1	-	52730139	52811735	5.68577	4.21697
ASHGA5P049946	0.013608	0.0486619	2.76775	up	noncoding	ENST00000581471	RP11-835E18.2	GENCODE	1564	chr18	+	5237824	5239388	CCCTGGCCACTACCAGGAAAAAGTATTTACTTTTAAAACTTGAATGTATATCTTTACCGT	intergenic							5.29073	3.82201
ASHGA5P052899	1.28584e-06	0.000289189	2.7669	up	noncoding	ENST00000455507	OSTCP1	pseudogene	450	chr6	-	159262752	159263202	CCATTCTTAGTGCTCGAATGTCCCAACCTGAAGCTGAAGAAGCCGCCCTGGCTGCAAGTG								5.08715	3.61888
ASHGA5P027181	0.0334813	0.0810318	2.75522	up	noncoding	ENST00000535163	RP11-428G5.5	GENCODE	852	chr12	-	32030012	32040137	AACAAAATTAGTTACCAGTAGACTTAGGCAAATGCTACACTGCACACAGGCGCATAACCC	intergenic							5.69984	4.23767
ASHGA5P021644	0.0391864	0.0886065	2.7533	up	noncoding	ENST00000537068	SNHG1	GENCODE	629	chr11	-	62619459	62623353	TTACAGGTGAGCACTGTATAGATGACCACTTTCGTAAACTACTGACCTAGCTTGTTGCCA	bidirectional	NM_001012662	SLC3A2	4F2 cell-surface antigen heavy chain isoform b	+	62623483	62656355	7.59333	6.13217
ASHGA5P021644	0.0391864	0.0886065	2.7533	up	noncoding	ENST00000537068	SNHG1	GENCODE	629	chr11	-	62619459	62623353	TTACAGGTGAGCACTGTATAGATGACCACTTTCGTAAACTACTGACCTAGCTTGTTGCCA	bidirectional	NM_001012664	SLC3A2	4F2 cell-surface antigen heavy chain isoform e	+	62623483	62656355	7.59333	6.13217
ASHGA5P021644	0.0391864	0.0886065	2.7533	up	noncoding	ENST00000537068	SNHG1	GENCODE	629	chr11	-	62619459	62623353	TTACAGGTGAGCACTGTATAGATGACCACTTTCGTAAACTACTGACCTAGCTTGTTGCCA	bidirectional	NM_002394	SLC3A2	4F2 cell-surface antigen heavy chain isoform c	+	62623483	62656355	7.59333	6.13217
ASHGA5P050888	0.0283712	0.0742369	2.75205	up	noncoding	ENST00000444990	AC093642.5	GENCODE	557	chr2	+	243030829	243058523	CACAAAAGAAGTAAGTATTCTATTATAAATAAGAGAGTATCTTGGATTGTTTCTGTTGAA	intergenic							4.90215	3.44164
ASHGA5P049477	0.00772671	0.03462	2.7511	up	noncoding	ENST00000498671	RPL29P2	GENCODE	657	chr17	+	7657637	7658294	TTCAGAGTAGATATCTCTGTCTGCCAACGTGAGGACAGAAGGACAGGTGCCACCCACCCC	intron sense-overlapping	NM_020877	DNAH2	dynein heavy chain 2, axonemal	+	7623038	7737058	6.84316	5.38315
ASHGA5P057461	2.3336e-07	8.2762e-05	2.74987	up	noncoding	TCONS_00017645	XLOC_008317	LincRNAs identified by Cabili et al	273	chrY	-	8555396	8559482	ATTCCTAAAATCTTCCTACACATTGTAAAGATCCCCTGCAAAGCCCACGATGAAGGGAGG	intergenic							4.85235	3.39299
ASHGA5P032460	0.01136	0.043819	2.74904	up	noncoding	uc002iik.1	HEXIM2	UCSC_knowngene	2048	chr17	-	43246171	43248852	TCAACCTTTTGGAACCATTTGTTTACAAAGAGACCTGTCTACTGTCTGTCCCCCAACCTT	natural antisense	NM_144608	HEXIM2	protein HEXIM2	+	43238263	43247406	8.06199	6.60306
ASHGA5P044292	0.00805861	0.0355713	2.74522	up	noncoding	NR_034003	LOC100130298	RefSeq	528	chr8	-	61878679	61880307	TTCACATCTCCAAAGGTCCTCTACCTTAGAAGAAGAAAGAAAGAGGGAAAGAGAAATAAA	intergenic							5.98354	4.52662
ASHGA5P045311	0.00725957	0.0334702	2.74253	up	noncoding	ENST00000456944	RP11-82L18.2	GENCODE	583	chr9	-	91703518	91724213	CTGGTGACCTTTCTACTGATTGCATTGTACCTCTTTCCCTGATATTAAAGATGTTTTTAA	intron sense-overlapping	NM_016848	SHC3	SHC-transforming protein 3	-	91620685	91793682	5.42538	3.96987
ASHGA5P020127	5.0815e-05	0.00236758	2.74144	up	noncoding	ENST00000508534	RP11-471J12.1	GENCODE	3144	chr4	+	174451608	174463082	AAGACAAACTGCAGATTGGCCAAGAAAGAATAAAGCACCTAGCCCTTTGGATGGACTCCT	bidirectional	NM_021973	HAND2	heart- and neural crest derivatives-expressed protein 2	-	174447651	174451378	4.0936	2.63867
ASHGA5P023263	0.0098523	0.0403232	2.73994	up	noncoding	ENST00000576606	RP11-874J12.2	GENCODE	391	chr18	+	3594109	3597370	CAGCTACGAGATGGATATCTGAGAGCCAGCGAACTTTCTTTACCTCCTAGTATCATTTCA	intronic antisense	NM_001003809	DLGAP1	disks large-associated protein 1 isoform 2	-	3496029	3845358	5.66775	4.21361
ASHGA5P023263	0.0098523	0.0403232	2.73994	up	noncoding	ENST00000576606	RP11-874J12.2	GENCODE	391	chr18	+	3594109	3597370	CAGCTACGAGATGGATATCTGAGAGCCAGCGAACTTTCTTTACCTCCTAGTATCATTTCA	intronic antisense	NM_001242761	DLGAP1	disks large-associated protein 1 isoform 3	-	3502142	4455266	5.66775	4.21361
ASHGA5P023263	0.0098523	0.0403232	2.73994	up	noncoding	ENST00000576606	RP11-874J12.2	GENCODE	391	chr18	+	3594109	3597370	CAGCTACGAGATGGATATCTGAGAGCCAGCGAACTTTCTTTACCTCCTAGTATCATTTCA	intronic antisense	NM_001242762	DLGAP1	disks large-associated protein 1 isoform 4	-	3496029	3874767	5.66775	4.21361
ASHGA5P023263	0.0098523	0.0403232	2.73994	up	noncoding	ENST00000576606	RP11-874J12.2	GENCODE	391	chr18	+	3594109	3597370	CAGCTACGAGATGGATATCTGAGAGCCAGCGAACTTTCTTTACCTCCTAGTATCATTTCA	intronic antisense	NM_001242763	DLGAP1	disks large-associated protein 1 isoform 5	-	3496029	3874767	5.66775	4.21361
ASHGA5P023263	0.0098523	0.0403232	2.73994	up	noncoding	ENST00000576606	RP11-874J12.2	GENCODE	391	chr18	+	3594109	3597370	CAGCTACGAGATGGATATCTGAGAGCCAGCGAACTTTCTTTACCTCCTAGTATCATTTCA	intronic antisense	NM_001242764	DLGAP1	disks large-associated protein 1 isoform 6	-	3496029	3874253	5.66775	4.21361
ASHGA5P023263	0.0098523	0.0403232	2.73994	up	noncoding	ENST00000576606	RP11-874J12.2	GENCODE	391	chr18	+	3594109	3597370	CAGCTACGAGATGGATATCTGAGAGCCAGCGAACTTTCTTTACCTCCTAGTATCATTTCA	intronic antisense	NM_001242765	DLGAP1	disks large-associated protein 1 isoform 7	-	3502142	3845358	5.66775	4.21361
ASHGA5P023263	0.0098523	0.0403232	2.73994	up	noncoding	ENST00000576606	RP11-874J12.2	GENCODE	391	chr18	+	3594109	3597370	CAGCTACGAGATGGATATCTGAGAGCCAGCGAACTTTCTTTACCTCCTAGTATCATTTCA	intronic antisense	NM_001242766	DLGAP1	disks large-associated protein 1 isoform 8	-	3496029	3845358	5.66775	4.21361
ASHGA5P023263	0.0098523	0.0403232	2.73994	up	noncoding	ENST00000576606	RP11-874J12.2	GENCODE	391	chr18	+	3594109	3597370	CAGCTACGAGATGGATATCTGAGAGCCAGCGAACTTTCTTTACCTCCTAGTATCATTTCA	intronic antisense	NM_004746	DLGAP1	disks large-associated protein 1 isoform 1	-	3496029	4455266	5.66775	4.21361
ASHGA5P020449	0.0153543	0.0525739	2.73425	up	noncoding	NR_038402	LOC100507387	RefSeq	1005	chr5	+	175546551	175552168	TTGCCACTAACATTGATGAACCAGATGCATGTCACCAGCCCATCACGGGCACCATGGGCC	intergenic							6.08237	4.63122
ASHGA5P026306	0.0434266	0.0945989	2.73078	up	noncoding	ENST00000510619	RP1-68D18.2	GENCODE	704	chr11	+	35234096	35235554	GGTGCCTTCATAATGGATAACTGTAGCCATTTTATGTAAGCATTGTCCTGTGATTAAAAA	intron sense-overlapping	NM_000610	CD44	CD44 antigen isoform 1 precursor	+	35160416	35253949	6.38147	4.93216
ASHGA5P026306	0.0434266	0.0945989	2.73078	up	noncoding	ENST00000510619	RP1-68D18.2	GENCODE	704	chr11	+	35234096	35235554	GGTGCCTTCATAATGGATAACTGTAGCCATTTTATGTAAGCATTGTCCTGTGATTAAAAA	intron sense-overlapping	NM_001001389	CD44	CD44 antigen isoform 2 precursor	+	35160416	35253949	6.38147	4.93216
ASHGA5P026306	0.0434266	0.0945989	2.73078	up	noncoding	ENST00000510619	RP1-68D18.2	GENCODE	704	chr11	+	35234096	35235554	GGTGCCTTCATAATGGATAACTGTAGCCATTTTATGTAAGCATTGTCCTGTGATTAAAAA	intron sense-overlapping	NM_001001390	CD44	CD44 antigen isoform 3 precursor	+	35160416	35253949	6.38147	4.93216
ASHGA5P026306	0.0434266	0.0945989	2.73078	up	noncoding	ENST00000510619	RP1-68D18.2	GENCODE	704	chr11	+	35234096	35235554	GGTGCCTTCATAATGGATAACTGTAGCCATTTTATGTAAGCATTGTCCTGTGATTAAAAA	intron sense-overlapping	NM_001001391	CD44	CD44 antigen isoform 4 precursor	+	35160416	35253949	6.38147	4.93216
ASHGA5P026306	0.0434266	0.0945989	2.73078	up	noncoding	ENST00000510619	RP1-68D18.2	GENCODE	704	chr11	+	35234096	35235554	GGTGCCTTCATAATGGATAACTGTAGCCATTTTATGTAAGCATTGTCCTGTGATTAAAAA	intron sense-overlapping	NM_001001392	CD44	CD44 antigen isoform 5 precursor	+	35160416	35253949	6.38147	4.93216
ASHGA5P026306	0.0434266	0.0945989	2.73078	up	noncoding	ENST00000510619	RP1-68D18.2	GENCODE	704	chr11	+	35234096	35235554	GGTGCCTTCATAATGGATAACTGTAGCCATTTTATGTAAGCATTGTCCTGTGATTAAAAA	intron sense-overlapping	NM_001202555	CD44	CD44 antigen isoform 6 precursor	+	35160416	35253949	6.38147	4.93216
ASHGA5P026306	0.0434266	0.0945989	2.73078	up	noncoding	ENST00000510619	RP1-68D18.2	GENCODE	704	chr11	+	35234096	35235554	GGTGCCTTCATAATGGATAACTGTAGCCATTTTATGTAAGCATTGTCCTGTGATTAAAAA	intron sense-overlapping	NM_001202556	CD44	CD44 antigen isoform 7 precursor	+	35160416	35253949	6.38147	4.93216
ASHGA5P026306	0.0434266	0.0945989	2.73078	up	noncoding	ENST00000510619	RP1-68D18.2	GENCODE	704	chr11	+	35234096	35235554	GGTGCCTTCATAATGGATAACTGTAGCCATTTTATGTAAGCATTGTCCTGTGATTAAAAA	intron sense-overlapping	NM_001202557	CD44	CD44 antigen isoform 8 precursor	+	35160416	35244867	6.38147	4.93216
ASHGA5P043363	0.0119626	0.045131	2.7251	up	noncoding	uc003vwb.1	AK098095	UCSC_knowngene	2750	chr7	-	140419137	140421887	CTGCTCAGGTCCCTTCATTTGTACTTTGGAGTTTTTCTCATGTAAATTTGTATAACAGAA	natural antisense	ENST00000461457	NDUFB2	NADH dehydrogenase (ubiquinone) 1 beta subcomplex, 2, 8kDa [Source:HGNC Symbol;Acc:7697]	+	140396487	140421755	7.05612	5.60981
ASHGA5P043363	0.0119626	0.045131	2.7251	up	noncoding	uc003vwb.1	AK098095	UCSC_knowngene	2750	chr7	-	140419137	140421887	CTGCTCAGGTCCCTTCATTTGTACTTTGGAGTTTTTCTCATGTAAATTTGTATAACAGAA	natural antisense	ENST00000476279	NDUFB2	NADH dehydrogenase (ubiquinone) 1 beta subcomplex, 2, 8kDa [Source:HGNC Symbol;Acc:7697]	+	140396470	140422590	7.05612	5.60981
ASHGA5P033795	4.0954e-06	0.000555348	2.72135	up	noncoding	ENST00000577354	RP11-449D8.5	GENCODE	472	chr18	+	22305744	22346609	TCAATCTTCTTTGCCACGTCATGCATGCCCTTGAAGCATTAGAATTCCTTAAAGCTTCAT	intergenic							4.24087	2.79655
ASHGA5P044116	0.00265765	0.0190255	2.71515	up	noncoding	uc003wtj.3	AK094525	UCSC_knowngene	3352	chr8	-	10713594	10716946	AACAAGCCAAAAGTTGTTTTCTTTACCTTTTTCCTCCATGCACCATGATTTCAATGATTG	intergenic							5.15754	3.71651
ASHGA5P000097	0.00749878	0.0339285	2.71244	up	noncoding	BC030084		RNAdb	629	chr3	+	40508031	40508645	CCAATTCCAGTACCCTGTGTAAAGGAAAACATATACATCTTGCAGACATTTTTTAATGTG	intergenic							6.07653	4.63694
ASHGA5P023321	0.0146819	0.0511841	2.71072	up	noncoding	NR_038889	LOC401320	RefSeq	3871	chr7	-	30587972	30617395	CCTCTTCCTGAAGAAATGCTGAGGCAGTGTCACGCTGGTGTCTGTCCTCCTTACAGAATG	intergenic							5.74287	4.3042
ASHGA5P037416	0.0404393	0.0901355	2.70823	up	noncoding	NR_001458	MIR155HG	RefSeq	1500	chr21	+	26934456	26947480	CAACTCTTCTCAACATTTTGTCCAGGTTATTCACTGTAACCAAATAAATCTCATGAGTCT	intergenic							6.69579	5.25844
ASHGA5P058102	0.000597352	0.00907024	2.70745	up	noncoding	TCONS_00026540	XLOC_012861	LincRNAs identified by Cabili et al	436	chr18	-	59273533	59274165	AAGGATCCAGTATTTGTTTTCAGGCAAAAGCAAGCCTCCAAAAGCCCCTTGGTTCTTCTC	intergenic							6.39469	4.95776
ASHGA5P044388	0.0194421	0.0598544	2.70741	up	noncoding	ENST00000522817	GS1-251I9.4	GENCODE	4275	chr8	-	92072136	92082351	ACAGTTCGGTGCTGAAAAAAGCATTTCTATTAAACTTCAAGACAGAATGAATGACCATAG	bidirectional	NM_016023	OTUD6B	OTU domain-containing protein 6B	+	92082423	92099323	4.3392	2.90228
ASHGA5P037296	0.00563723	0.0292712	2.70741	up	noncoding	NR_038894	CBR3-AS1	RefSeq	743	chr21	-	37513693	37528606	TAGTAGTTGCTTGTCCTATTGACTCAGAACCTTGAACAAATAAGCAAGTCAAATACAGAT	natural antisense	NM_001236	CBR3	carbonyl reductase [NADPH] 3	+	37507262	37518860	4.46346	3.02655
ASHGA5P022004	9.3258e-07	0.00023887	2.6962	up	noncoding	ENST00000546798	HOXD-AS1	GENCODE	581	chr2	-	177041113	177042853	GTGTCCTCAGATCTGGGGACCCTTCACCTGCCTCTACTACTGCAAATGATTGGATATTCG	intergenic							5.23898	3.80805
ASHGA5P017642	0.0342753	0.0820915	2.69357	up	noncoding	ENST00000444062	RP11-322M19.1	GENCODE	311	chr10	-	88998500	89066627	CAGGAAATTGGCAACGTGTTGGACCTTCCGGAGCTTCTCAGAAGACAGAGGGTTTTCTTT	intergenic							6.01412	4.5846
ASHGA5P038732	0.0272617	0.0725831	2.69206	up	noncoding	ENST00000561507	RP11-1024P17.1	GENCODE	1916	chr3	+	30739152	30741068	CTGACACAATGTAGGAGCAATCCATGGTACTCAAAGAATATTATGGAATTTAACAACAAG	intergenic							4.81	3.38129
ASHGA5P033294	0.0143982	0.0504621	2.69095	up	noncoding	NR_046273	LOC729683	RefSeq	2348	chr17	+	61777697	61780045	GGAACTTTTTAGCTCCAAAGTGGTTTGATGACCACAGGCTAAAATTCATAGTCTTAAAAT	natural antisense	ENST00000578402	LIMD2	LIM domain containing 2 [Source:HGNC Symbol;Acc:28142]	-	61775175	61778045	6.18567	4.75756
ASHGA5P033294	0.0143982	0.0504621	2.69095	up	noncoding	NR_046273	LOC729683	RefSeq	2348	chr17	+	61777697	61780045	GGAACTTTTTAGCTCCAAAGTGGTTTGATGACCACAGGCTAAAATTCATAGTCTTAAAAT	natural antisense	ENST00000584645	LIMD2	LIM domain containing 2 [Source:HGNC Symbol;Acc:28142]	-	61775968	61778532	6.18567	4.75756
ASHGA5P044415	0.0309485	0.0777551	2.69024	up	noncoding	TCONS_00018869	XLOC_008691	LincRNAs identified by Cabili et al	1001	chr10	-	3107633	3108996	CATCAAGTCGTCTGTAATACAGAAAACGATAAATACAACCTAACAGTTCAAACATGACGA	intergenic							4.84773	3.42
ASHGA5P014021	3.681e-08	2.2628e-05	2.68923	up	noncoding	ENST00000398732	ZNF876P	pseudogene	1485	chr4	+	212438	248630	TGGTCTCCCTTAACTCAGACCTGATCACCTGTTTGGAGCAAAGAAAAGAGCCCTTTAATG								5.19917	3.77198
ASHGA5P034318	0.0012649	0.0131644	2.68684	up	noncoding	uc002pzg.1	BX537909	UCSC_knowngene	1855	chr19	-	52897579	52901010	TTATATCCACGAAAATTCCTTCTATTAAAATGAATTTCAAGTCCCACCTACCCTGGAAGC	bidirectional	NM_032423	ZNF528	zinc finger protein 528	+	52901120	52921657	4.7903	3.36439
ASHGA5P049520	0.00645419	0.0312903	2.68498	up	noncoding	NR_045024	C17orf76-AS1	RefSeq	642	chr17	+	16342300	16344525	CCAAGAGAAGGTAAGCCTTGAGCTGGCCAATGATCCCTTCAACCCCATAGTGGAATGAAT	intergenic							6.46209	5.03718
ASHGA5P007387	0.00113608	0.0123681	2.6827	up	noncoding	ENST00000332123	RP11-178A10.1	GENCODE	2264	chr10	+	42970990	42990784	CCAGCCGCGCTTTTGCCTGCACTCTCCCTGGATGCTGGAGGCTGGAGGCAGTGACGCAGC	intergenic							6.08561	4.66193
ASHGA5P021463	1.8474e-07	7.7431e-05	2.67701	up	noncoding	ENST00000532849	RP11-164N3.1	GENCODE	572	chr11	+	87783273	87795278	TTACCCTTTATAGAACAGCCTGTGTCTTACTCAGATCCCTTATTAAAATCCTGACATCCC	intergenic							4.177	2.75637
ASHGA5P023650	0.000961065	0.011469	2.67689	up	noncoding	HMlincRNA1294+	HMlincRNA1294	LincRNAs identified by Khalil et al	9350	chr2	+	72079817	72089167	TAGTGTATCTTGTTTTATAAAGATATTGGGGCAGTGTGCCCGCTCCCTGCTAAGAGCTCT	intergenic							4.33316	2.9126
ASHGA5P019332	0.0392298	0.088618	2.67603	up	noncoding	NR_045147	ITGB3BP	RefSeq	1069	chr1	-	63906440	63988944	GCTCTCCTAGCATCACGTCATCTTGACAGCTATGAATTCCTTAAAGCCATTTTAAACTGA	exon sense-overlapping	NM_001206739	ITGB3BP	centromere protein R isoform 1	-	63906440	63988944	7.81854	6.39845
ASHGA5P019332	0.0392298	0.088618	2.67603	up	noncoding	NR_045147	ITGB3BP	RefSeq	1069	chr1	-	63906440	63988944	GCTCTCCTAGCATCACGTCATCTTGACAGCTATGAATTCCTTAAAGCCATTTTAAACTGA	exon sense-overlapping	NM_014288	ITGB3BP	centromere protein R isoform 2	-	63906440	63988944	7.81854	6.39845
ASHGA5P053403	0.0496898	0.102389	2.67244	up	noncoding	ENST00000455838	GAS5	GENCODE	632	chr1	-	173834092	173837127	ACTACACTGTGTGGAGCAAGTTTTAAAGAAGCAAAGGTATAGCAGTTCCAAGTATTTTTT	bidirectional	NM_001122770	ZBTB37	zinc finger and BTB domain-containing protein 37 isoform a	+	173837492	173855774	7.14009	5.72193
ASHGA5P053403	0.0496898	0.102389	2.67244	up	noncoding	ENST00000455838	GAS5	GENCODE	632	chr1	-	173834092	173837127	ACTACACTGTGTGGAGCAAGTTTTAAAGAAGCAAAGGTATAGCAGTTCCAAGTATTTTTT	bidirectional	NM_032522	ZBTB37	zinc finger and BTB domain-containing protein 37 isoform b	+	173837492	173842778	7.14009	5.72193
ASHGA5P047188	0.0163311	0.054664	2.67176	up	noncoding	DB224058		LincRNAs identified by Khalil et al	570	chr2	-	180851421	180872023	GCCTGGATCGACTACTTTGACTCTGGTATTATGATATGGTATTTGAAATAAATTAAAGGG	exon sense-overlapping	ENST00000295749	CWC22	CWC22 spliceosome-associated protein homolog (S. cerevisiae) [Source:HGNC Symbol;Acc:29322]	-	180809855	180871840	4.61094	3.19315
ASHGA5P047188	0.0163311	0.054664	2.67176	up	noncoding	DB224058		LincRNAs identified by Khalil et al	570	chr2	-	180851421	180872023	GCCTGGATCGACTACTTTGACTCTGGTATTATGATATGGTATTTGAAATAAATTAAAGGG	exon sense-overlapping	ENST00000404136	CWC22	CWC22 spliceosome-associated protein homolog (S. cerevisiae) [Source:HGNC Symbol;Acc:29322]	-	180810347	180871840	4.61094	3.19315
ASHGA5P047188	0.0163311	0.054664	2.67176	up	noncoding	DB224058		LincRNAs identified by Khalil et al	570	chr2	-	180851421	180872023	GCCTGGATCGACTACTTTGACTCTGGTATTATGATATGGTATTTGAAATAAATTAAAGGG	exon sense-overlapping	ENST00000410053	CWC22	CWC22 spliceosome-associated protein homolog (S. cerevisiae) [Source:HGNC Symbol;Acc:29322]	-	180809602	180871780	4.61094	3.19315
ASHGA5P047188	0.0163311	0.054664	2.67176	up	noncoding	DB224058		LincRNAs identified by Khalil et al	570	chr2	-	180851421	180872023	GCCTGGATCGACTACTTTGACTCTGGTATTATGATATGGTATTTGAAATAAATTAAAGGG	exon sense-overlapping	NM_020943	CWC22	pre-mRNA-splicing factor CWC22 homolog	-	180809603	180871780	4.61094	3.19315
ASHGA5P045992	0.000113527	0.00366025	2.66736	up	noncoding	BC034527		LincRNAs identified by Khalil et al	1077	chr1	-	211713915	211714910	TGTAAAGGATCCCTCCCACTGCTGAGCAAGAAGGTGGGAAATGGGAGAGCAGCTCTCGGA	intergenic							4.77876	3.36335
ASHGA5P036619	0.00685344	0.0325248	2.66449	up	noncoding	TCONS_00026679	XLOC_012776	LincRNAs identified by Cabili et al	338	chr18	-	12739783	12749484	ACACTCATTCCCGAGGACTCATCCAATACTAATAAGAGAATGCTCTTGTTTTTGAAGAAT	intergenic							4.58136	3.1675
ASHGA5P021173	0.0370802	0.0857794	2.66012	up	noncoding	ENST00000526897	RP11-802E16.3	GENCODE	791	chr11	+	67819559	67821161	CAGGAAGACGGACATTTCATATATATGGATTTCACAGCTACACTCGATCCACGCCCCACA	natural antisense	NM_001277	CHKA	choline kinase alpha isoform a	-	67820325	67888858	5.10799	3.6965
ASHGA5P021173	0.0370802	0.0857794	2.66012	up	noncoding	ENST00000526897	RP11-802E16.3	GENCODE	791	chr11	+	67819559	67821161	CAGGAAGACGGACATTTCATATATATGGATTTCACAGCTACACTCGATCCACGCCCCACA	natural antisense	NM_212469	CHKA	choline kinase alpha isoform b	-	67820325	67888858	5.10799	3.6965
ASHGA5P042166	0.0186064	0.0584364	2.65586	up	noncoding	NR_037593	CAHM	RefSeq	903	chr6	-	163834096	163834982	GTCGGCAGTCCCTAAATCTACGTCTGCATTTTGTTGCAAATCCTTTATAACATTCCATTA	bidirectional	NM_006775	QKI	protein quaking isoform HQK-5	+	163835674	163999628	7.7797	6.37052
ASHGA5P042166	0.0186064	0.0584364	2.65586	up	noncoding	NR_037593	CAHM	RefSeq	903	chr6	-	163834096	163834982	GTCGGCAGTCCCTAAATCTACGTCTGCATTTTGTTGCAAATCCTTTATAACATTCCATTA	bidirectional	NM_206853	QKI	protein quaking isoform HQK-6	+	163835674	163999628	7.7797	6.37052
ASHGA5P042166	0.0186064	0.0584364	2.65586	up	noncoding	NR_037593	CAHM	RefSeq	903	chr6	-	163834096	163834982	GTCGGCAGTCCCTAAATCTACGTCTGCATTTTGTTGCAAATCCTTTATAACATTCCATTA	bidirectional	NM_206854	QKI	protein quaking isoform HQK-7	+	163835674	163999628	7.7797	6.37052
ASHGA5P042166	0.0186064	0.0584364	2.65586	up	noncoding	NR_037593	CAHM	RefSeq	903	chr6	-	163834096	163834982	GTCGGCAGTCCCTAAATCTACGTCTGCATTTTGTTGCAAATCCTTTATAACATTCCATTA	bidirectional	NM_206855	QKI	protein quaking isoform HQK-7B	+	163835674	163999628	7.7797	6.37052
ASHGA5P021331	0.0338268	0.081547	2.65577	up	noncoding	NR_024597	C11orf73	RefSeq	1054	chr11	+	86013252	86056985	TTCTGAAATGATATTTCTTTTCACTTTGAGTATCCTAGAGATGGGAGGATGCCTAGGAAG	exon sense-overlapping	NM_016401	C11orf73	protein Hikeshi	+	86013252	86056985	4.63486	3.22574
ASHGA5P025804	0.0378281	0.0866401	2.65458	up	noncoding	NR_038193	METTL23	RefSeq	809	chr17	+	74722911	74729962	CGTCCCGCAGATTTTGAAGACATTTTGGCTACAATATATTTTTTGATGCACAAGAATCCC	exon sense-overlapping	NM_001080510	METTL23	methyltransferase-like protein 23 isoform 1	+	74722911	74729962	5.02297	3.61448
ASHGA5P025804	0.0378281	0.0866401	2.65458	up	noncoding	NR_038193	METTL23	RefSeq	809	chr17	+	74722911	74729962	CGTCCCGCAGATTTTGAAGACATTTTGGCTACAATATATTTTTTGATGCACAAGAATCCC	exon sense-overlapping	NM_001206983	METTL23	methyltransferase-like protein 23 isoform 1	+	74722911	74729962	5.02297	3.61448
ASHGA5P025804	0.0378281	0.0866401	2.65458	up	noncoding	NR_038193	METTL23	RefSeq	809	chr17	+	74722911	74729962	CGTCCCGCAGATTTTGAAGACATTTTGGCTACAATATATTTTTTGATGCACAAGAATCCC	exon sense-overlapping	NM_001206984	METTL23	methyltransferase-like protein 23 isoform 1	+	74722911	74729962	5.02297	3.61448
ASHGA5P025804	0.0378281	0.0866401	2.65458	up	noncoding	NR_038193	METTL23	RefSeq	809	chr17	+	74722911	74729962	CGTCCCGCAGATTTTGAAGACATTTTGGCTACAATATATTTTTTGATGCACAAGAATCCC	exon sense-overlapping	NM_001206985	METTL23	methyltransferase-like protein 23 isoform 2	+	74722911	74729962	5.02297	3.61448
ASHGA5P025804	0.0378281	0.0866401	2.65458	up	noncoding	NR_038193	METTL23	RefSeq	809	chr17	+	74722911	74729962	CGTCCCGCAGATTTTGAAGACATTTTGGCTACAATATATTTTTTGATGCACAAGAATCCC	exon sense-overlapping	NM_001206986	METTL23	methyltransferase-like protein 23 isoform 2	+	74722911	74729962	5.02297	3.61448
ASHGA5P025804	0.0378281	0.0866401	2.65458	up	noncoding	NR_038193	METTL23	RefSeq	809	chr17	+	74722911	74729962	CGTCCCGCAGATTTTGAAGACATTTTGGCTACAATATATTTTTTGATGCACAAGAATCCC	exon sense-overlapping	NM_001206987	METTL23	methyltransferase-like protein 23 isoform 2	+	74722911	74729962	5.02297	3.61448
ASHGA5P033511	0.000348936	0.00670118	2.65415	up	noncoding	DA100307		LincRNAs identified by Khalil et al	549	chr11	+	88071055	88157725	ATGCAGGACCCTTGGTGGCACCAGTGTGCAGATGAGCAGATAGTGACTGATTGCCACTGG	intergenic							6.44472	5.03647
ASHGA5P015820	0.0218178	0.0635229	2.65057	up	noncoding	uc003bnq.1	RPL23AP82	UCSC_knowngene	673	chr22	+	51222224	51227600	ACACTACAGAAAGAATCCCAGACTTCTTAGAGAACCCAGTGACTTTTTGCACCTTAAATC	bidirectional	NM_001003789	RABL2B	rab-like protein 2B isoform 1	-	51205919	51222087	6.43902	5.03271
ASHGA5P015820	0.0218178	0.0635229	2.65057	up	noncoding	uc003bnq.1	RPL23AP82	UCSC_knowngene	673	chr22	+	51222224	51227600	ACACTACAGAAAGAATCCCAGACTTCTTAGAGAACCCAGTGACTTTTTGCACCTTAAATC	bidirectional	NM_001130919	RABL2B	rab-like protein 2B isoform 1	-	51205919	51222087	6.43902	5.03271
ASHGA5P015820	0.0218178	0.0635229	2.65057	up	noncoding	uc003bnq.1	RPL23AP82	UCSC_knowngene	673	chr22	+	51222224	51227600	ACACTACAGAAAGAATCCCAGACTTCTTAGAGAACCCAGTGACTTTTTGCACCTTAAATC	bidirectional	NM_001130920	RABL2B	rab-like protein 2B isoform 1	-	51205919	51222087	6.43902	5.03271
ASHGA5P015820	0.0218178	0.0635229	2.65057	up	noncoding	uc003bnq.1	RPL23AP82	UCSC_knowngene	673	chr22	+	51222224	51227600	ACACTACAGAAAGAATCCCAGACTTCTTAGAGAACCCAGTGACTTTTTGCACCTTAAATC	bidirectional	NM_001130921	RABL2B	rab-like protein 2B isoform 1	-	51205919	51222087	6.43902	5.03271
ASHGA5P015820	0.0218178	0.0635229	2.65057	up	noncoding	uc003bnq.1	RPL23AP82	UCSC_knowngene	673	chr22	+	51222224	51227600	ACACTACAGAAAGAATCCCAGACTTCTTAGAGAACCCAGTGACTTTTTGCACCTTAAATC	bidirectional	NM_001130922	RABL2B	rab-like protein 2B isoform 2	-	51205919	51222087	6.43902	5.03271
ASHGA5P015820	0.0218178	0.0635229	2.65057	up	noncoding	uc003bnq.1	RPL23AP82	UCSC_knowngene	673	chr22	+	51222224	51227600	ACACTACAGAAAGAATCCCAGACTTCTTAGAGAACCCAGTGACTTTTTGCACCTTAAATC	bidirectional	NM_001130923	RABL2B	rab-like protein 2B isoform 3	-	51205919	51222087	6.43902	5.03271
ASHGA5P015820	0.0218178	0.0635229	2.65057	up	noncoding	uc003bnq.1	RPL23AP82	UCSC_knowngene	673	chr22	+	51222224	51227600	ACACTACAGAAAGAATCCCAGACTTCTTAGAGAACCCAGTGACTTTTTGCACCTTAAATC	bidirectional	NM_007081	RABL2B	rab-like protein 2B isoform 2	-	51205919	51222087	6.43902	5.03271
ASHGA5P046513	0.03078	0.0775498	2.6472	up	noncoding	uc004dgs.4	LOC401588	UCSC_knowngene	1905	chrX	+	46404927	46407670	AGTGTGAATTTTCTAATGCTGAGTAAGTTGTGATCCAGAAGTAAATGTATCTGCAAGCTG	bidirectional	NM_001039891	ZNF674	zinc finger protein 674 isoform 1	-	46357159	46404892	6.56098	5.15651
ASHGA5P046513	0.03078	0.0775498	2.6472	up	noncoding	uc004dgs.4	LOC401588	UCSC_knowngene	1905	chrX	+	46404927	46407670	AGTGTGAATTTTCTAATGCTGAGTAAGTTGTGATCCAGAAGTAAATGTATCTGCAAGCTG	bidirectional	NM_001146291	ZNF674	zinc finger protein 674 isoform 2	-	46357159	46404892	6.56098	5.15651
ASHGA5P046513	0.03078	0.0775498	2.6472	up	noncoding	uc004dgs.4	LOC401588	UCSC_knowngene	1905	chrX	+	46404927	46407670	AGTGTGAATTTTCTAATGCTGAGTAAGTTGTGATCCAGAAGTAAATGTATCTGCAAGCTG	bidirectional	NM_001190417	ZNF674	zinc finger protein 674 isoform 3	-	46357159	46404892	6.56098	5.15651
ASHGA5P025994	0.0140291	0.0496021	2.64676	up	noncoding	NR_049759	IFITM3	RefSeq	673	chr11	-	319672	320914	ATGAACCCCTGCTGCCTGGGCTTCATAGCATTCGCCTACTCCGTGAAGGGACAGGAAGAT	exon sense-overlapping	NM_021034	IFITM3	interferon-induced transmembrane protein 3	-	319672	320914	10.2448	8.8406
ASHGA5P045576	2.305e-08	1.635e-05	2.6464	up	noncoding	TCONS_00001791	XLOC_001183	LincRNAs identified by Cabili et al	307	chr1	-	208442558	208443453	TTTCAAATGCTTGGCTTTCAGGGCTCTGATGTTTCCCTGCACAGTTGTGTCCAATCATGA	intergenic							4.30925	2.90522
ASHGA5P000054	0.0273063	0.0726042	2.64509	up	noncoding	AK091357		RNAdb	2311	chr8	-	17082475	17084786	GTGAGCAGGTGTCTTGTATCACTGCGAAACCCATGCATAATAAAAACTTGTTCTTGAGCT	intergenic							6.04866	4.64535
ASHGA5P037411	0.0229784	0.0654165	2.6443	up	noncoding	ENST00000453784	AP000476.1	GENCODE	2909	chr21	+	25801053	25862621	CTGGGATAAAGATTGCTGCATCCTTATATTCTTGTGTATAAACAGACCCTGTATATGTAA	intergenic							4.84566	3.44277
ASHGA5P032466	0.0495828	0.102259	2.64064	up	noncoding	ENST00000579913	LRRC37A4P	GENCODE	3243	chr17	-	43584106	43592522	TTTACAGTCATATCATCTAGCCCAGCAAGTCATGGAAGCATAGTTGTTAAAATCATCTGA	intronic antisense	ENST00000253803	AC091132.2	Uncharacterized protein [Source:UniProtKB/TrEMBL;Acc:H7BXE8]	+	43580625	43611631	5.32029	3.9194
ASHGA5P032608	0.0451961	0.0967459	2.63828	up	noncoding	ENST00000565833	AMZ2P1	pseudogene	850	chr17	-	62964339	62969635	ATCTGTTTGCACAAGTTGCAGTGTGCTGTTATTGGCTTCAGCATTGTAGAAAGATATAAA								6.40618	5.00658
ASHGA5P018960	0.0262578	0.0709207	2.63629	up	noncoding	ENST00000462492	RP11-398A8.3	GENCODE	235	chr3	-	72141579	72150020	CGGTGATGAACAAGGCTATTGCTTAAAGACTGAATGACATGGACCCCAGAGTTTATGTGA	intergenic							6.46345	5.06495
ASHGA5P034766	0.0219385	0.0636556	2.63528	up	noncoding	ENST00000452378	RP4-635E18.7	GENCODE	2682	chr1	+	11128527	11133154	TGTGCTCTCATTCTTACTCATAATGCTGGTAAAAACAAGCCAGATAAGTAAGATAGAGTG	natural antisense	NM_001001998	EXOSC10	exosome component 10 isoform 1	-	11126675	11159938	4.90498	3.50702
ASHGA5P034766	0.0219385	0.0636556	2.63528	up	noncoding	ENST00000452378	RP4-635E18.7	GENCODE	2682	chr1	+	11128527	11133154	TGTGCTCTCATTCTTACTCATAATGCTGGTAAAAACAAGCCAGATAAGTAAGATAGAGTG	natural antisense	NM_002685	EXOSC10	exosome component 10 isoform 2	-	11126675	11159938	4.90498	3.50702
ASHGA5P046799	0.00326592	0.0214172	2.63116	up	noncoding	NR_026710	ASMTL-AS1	RefSeq	1789	chrY	+	1469423	1482479	GGGGCGCATGTAGCTGCACGCCCCTCTGTAATTGCTGAAATAAAAAGATGGTCTGCTGTA	natural antisense	NM_001173473	ASMTL	N-acetylserotonin O-methyltransferase-like protein isoform 2	-	1472031	1522655	6.45975	5.06405
ASHGA5P046799	0.00326592	0.0214172	2.63116	up	noncoding	NR_026710	ASMTL-AS1	RefSeq	1789	chrY	+	1469423	1482479	GGGGCGCATGTAGCTGCACGCCCCTCTGTAATTGCTGAAATAAAAAGATGGTCTGCTGTA	natural antisense	NM_001173474	ASMTL	N-acetylserotonin O-methyltransferase-like protein isoform 3	-	1472031	1521870	6.45975	5.06405
ASHGA5P046799	0.00326592	0.0214172	2.63116	up	noncoding	NR_026710	ASMTL-AS1	RefSeq	1789	chrY	+	1469423	1482479	GGGGCGCATGTAGCTGCACGCCCCTCTGTAATTGCTGAAATAAAAAGATGGTCTGCTGTA	natural antisense	NM_004192	ASMTL	N-acetylserotonin O-methyltransferase-like protein isoform 1	-	1472031	1521870	6.45975	5.06405
ASHGA5P013966	0.0294592	0.0757933	2.6281	up	noncoding	NR_034172	KANSL1-AS1	RefSeq	538	chr17	+	44270938	44274089	TGCGGCCGAGGAATGGCCATGAGATGTGAGTAGAAGCCCCCTGGACAGCCTCCAAAAGAG	intronic antisense	NM_001193465	KANSL1	KAT8 regulatory NSL complex subunit 1 isoform 2	-	44107281	44302740	9.15986	7.76584
ASHGA5P017126	0.0131214	0.0476376	2.62744	up	noncoding	ENST00000437899	RP11-38L15.2	GENCODE	369	chr10	-	46937462	46951699	TGATTAACAGTTACAAGCTATTGAGGCACTCCAGAGTGACGGCATGTGATCCCCCTGACA	intronic antisense	ENST00000301038	FAM35B	family with sequence similarity 35, member B [Source:HGNC Symbol;Acc:31425]	+	46897640	46939148	6.93584	5.54218
ASHGA5P017126	0.0131214	0.0476376	2.62744	up	noncoding	ENST00000437899	RP11-38L15.2	GENCODE	369	chr10	-	46937462	46951699	TGATTAACAGTTACAAGCTATTGAGGCACTCCAGAGTGACGGCATGTGATCCCCCTGACA	intronic antisense	ENST00000539388	FAM35B	family with sequence similarity 35, member B [Source:HGNC Symbol;Acc:31425]	+	46914586	46938619	6.93584	5.54218
ASHGA5P048022	3.41772e-06	0.000512278	2.62074	up	noncoding	ENST00000530263	RP4-607I7.1	GENCODE	422	chr11	-	35157780	35159273	TTCACCTCATGCAACCTCCAGGGATTTCAGCTTCCTTTTCTTGGAGCAAGAAAGTGAAGT	intergenic							4.59979	3.20981
ASHGA5P038698	0.0323872	0.079638	2.61995	up	noncoding	ENST00000443565	RP5-887A10.1	GENCODE	473	chr1	+	81106968	81112473	ATTTTTGGCTTTCGGCTCTGGAAAATATGAGAAATATGGGCAATTACTCTCTGAAGAAAG	intergenic							4.95886	3.56932
ASHGA5P032510	0.0366664	0.0850557	2.61779	up	noncoding	ENST00000504438	RP11-463M16.4	pseudogene	285	chr17	-	46952275	46952560	TTTAAGATTAAGAGGCATACACCACTCAGTAAACTAATGAAAGCCTATTGTGAACAACAG								5.16806	3.77971
ASHGA5P038235	0.000427192	0.00751034	2.61302	up	noncoding	ENST00000452042	RP13-131K19.2	GENCODE	782	chr3	-	49022481	49027421	GAAAAATTCTGCCTGACCTTTCCCATCTTCCTGATGATGTTAACAAACGACAGCCACTGA	natural antisense	NM_006321	ARIH2	E3 ubiquitin-protein ligase ARIH2	+	48956280	49022971	6.03214	4.64642
ASHGA5P038235	0.000427192	0.00751034	2.61302	up	noncoding	ENST00000452042	RP13-131K19.2	GENCODE	782	chr3	-	49022481	49027421	GAAAAATTCTGCCTGACCTTTCCCATCTTCCTGATGATGTTAACAAACGACAGCCACTGA	natural antisense	NM_177938	P4HTM	transmembrane prolyl 4-hydroxylase isoform c	+	49027340	49044581	6.03214	4.64642
ASHGA5P038235	0.000427192	0.00751034	2.61302	up	noncoding	ENST00000452042	RP13-131K19.2	GENCODE	782	chr3	-	49022481	49027421	GAAAAATTCTGCCTGACCTTTCCCATCTTCCTGATGATGTTAACAAACGACAGCCACTGA	natural antisense	NM_177939	P4HTM	transmembrane prolyl 4-hydroxylase isoform a	+	49027340	49044581	6.03214	4.64642
ASHGA5P047573	0.0201609	0.0610249	2.61249	up	noncoding	TCONS_00013555	XLOC_006188	LincRNAs identified by Cabili et al	803	chr7	+	99605668	99606730	TCTGTGTCCAATGCCAGACCCTGCAACTGCTGATTTACATGAATCAACTCCATCATGCAA	intergenic							5.03987	3.65445
ASHGA5P027164	0.0372706	0.0860256	2.61104	up	noncoding	ENST00000427824	RP3-467K16.4	GENCODE	5178	chr1	-	15729474	15735929	TTATGCGGCAGGCAACAGCTGTGCAGATCCTAATAATCTACTCTGGGTGACAGTTTAACA	bidirectional	NM_024329	EFHD2	EF-hand domain-containing protein D2	+	15736390	15756839	5.4406	4.05598
ASHGA5P039563	0.0471437	0.0989782	2.61026	up	noncoding	ENST00000441170	AC092661.2	GENCODE	1663	chr4	-	118495666	118497329	TTTCAGACATGGTGAATGCATCGACTGGAAGCTCCTTTTTCTCCACCTCTCTCAATACAT	intergenic							7.16647	5.78228
ASHGA5P017424	0.0239628	0.0671205	2.61008	up	noncoding	uc001eks.3	LOC728875	UCSC_knowngene	775	chr1	-	144300511	144341755	AGGGATGGTGCAGAATGGGGAAATGGAGAGAGAACCTGAAAGAGCCCCAAACTCGAGGAC	intronic antisense	ENST00000538264	AL592284.2	Uncharacterized protein [Source:UniProtKB/TrEMBL;Acc:F5H305]	+	144339737	144521058	8.58305	7.19895
ASHGA5P040872	0.0319826	0.0791571	2.60711	up	noncoding	ENST00000511921	CTB-114C7.4	GENCODE	2182	chr5	-	169735704	169739720	TTCCTCATTTTACAGTAAGGGAAACACCCCTGGTACAAAGTAAATACTCAATGCTCATTA	intergenic							5.68797	4.30552
ASHGA5P043406	0.00500185	0.0273721	2.6066	up	noncoding	ENST00000467944	RP4-798C17.6	GENCODE	422	chr7	-	144004237	144040392	GATGGTTTCCCTAGAAGCTACTACCTCTCCCTGGAGGGTGGAGATATTTGCTGGTCAAAG	intronic antisense	NM_001001802	OR2A42	olfactory receptor 2A1/2A42	+	144015217	144016150	7.63225	6.25008
ASHGA5P043406	0.00500185	0.0273721	2.6066	up	noncoding	ENST00000467944	RP4-798C17.6	GENCODE	422	chr7	-	144004237	144040392	GATGGTTTCCCTAGAAGCTACTACCTCTCCCTGGAGGGTGGAGATATTTGCTGGTCAAAG	intronic antisense	NM_001005287	OR2A1	olfactory receptor 2A1/2A42	+	144015217	144016150	7.63225	6.25008
ASHGA5P047450	0.00269568	0.0191649	2.60611	up	noncoding	BF950033		LincRNAs identified by Khalil et al	283	chr1	+	26948061	26948325	AATTTAAGCAACCTTAGAAAACCAGCGCCTAAACCTTTCCTCTTAGGACCCTCAAGCTTT	intergenic							4.67014	3.28824
ASHGA5P045703	1.60452e-06	0.000328784	2.60415	up	noncoding	TCONS_00001880	XLOC_001263	LincRNAs identified by Cabili et al	657	chr1	-	234844780	234848736	ACTTACTGTGGCTTATTTTGTTCCCTCTGCCTGAAAGAGGTCTCTTCACCTGTCAAACTC	intergenic							5.01788	3.63707
ASHGA5P019670	0.0154218	0.0526878	2.6016	up	noncoding	uc001vmo.4	BC035106	UCSC_knowngene	2905	chr13	-	96325091	96329179	GTAATGTGAAGAATAAAGGAGTCAGATCCAGGAAACCCCATAACTATTATGAAACATTTC	bidirectional	NM_006260	DNAJC3	dnaJ homolog subfamily C member 3 precursor	+	96329392	96447243	6.01392	4.63453
ASHGA5P037217	0.0308697	0.0776314	2.60108	up	noncoding	ENST00000436373	AP001171.1	GENCODE	864	chr21	-	21629064	21631133	GACATGGTATATGCAAGAATAAATGTGTGCGTGAATCAAACCAGAGGTTGTGTTTATTTT	intergenic							4.49204	3.11293
ASHGA5P051173	0.0325745	0.0797795	2.59855	up	noncoding	uc002zlf.2	P704P	UCSC_knowngene	4260	chr22	-	16251235	16255495	CAAATGCTTCTAGGTGGACGCTGACTTAGTTGCATTACACCCTTTCTTGACAAAACCAAA	intergenic							7.36551	5.9878
ASHGA5P057061	0.000195763	0.00494879	2.59787	up	noncoding	TCONS_00012383	XLOC_005950	LincRNAs identified by Cabili et al	280	chr6	-	170920274	170921789	TCGGTGTGCCGTGGGTCCGCGCTGCTTCCACCCAACTTCCTGTTAGTTTCTCTCCTGTCA	intergenic							6.07248	4.69515
ASHGA5P036782	0.0281008	0.0739492	2.59706	up	noncoding	ENST00000570096	RP4-616B8.4	GENCODE	187	chr20	-	37590567	37590754	GCACTGGGCGTTGAAGCAGTGCTTTCTGGATTAAATACGAAATACTGATGTCACAAGCTA	bidirectional	NM_001190809	DHX35	probable ATP-dependent RNA helicase DHX35 isoform 2	+	37590980	37668366	4.81688	3.44
ASHGA5P036782	0.0281008	0.0739492	2.59706	up	noncoding	ENST00000570096	RP4-616B8.4	GENCODE	187	chr20	-	37590567	37590754	GCACTGGGCGTTGAAGCAGTGCTTTCTGGATTAAATACGAAATACTGATGTCACAAGCTA	bidirectional	NM_021931	DHX35	probable ATP-dependent RNA helicase DHX35 isoform 1	+	37590980	37668366	4.81688	3.44
ASHGA5P000100	0.0244244	0.068062	2.59603	up	noncoding	BC043009		NRED	1261	chr10	-	33176190	33177408	CACCTCATCTTTTGCTCAAATTGAAATGTCATCGAACTGTATTTCTCAAGTCAATGGTCT	intergenic							6.78498	5.40868
ASHGA5P030765	0.0349511	0.0828068	2.59536	up	noncoding	NR_037601	LOC100507217	RefSeq	1787	chr15	+	93426072	93441977	GAACTCATCTTCATGATCGAATTTAAAAGAACAATGGAACCCTGACTACGTTTCAACAAA	exon sense-overlapping	ENST00000556722	CHD2	chromodomain helicase DNA binding protein 2 [Source:HGNC Symbol;Acc:1917]	+	93426525	93480855	8.14121	6.76527
ASHGA5P036079	5.7022e-07	0.000175267	2.58726	up	noncoding	TCONS_00016345	XLOC_007726	LincRNAs identified by Cabili et al	329	chr9	-	72432132	72432722	TGCTCAATTCCTGGAAAAGCCCCTACTCAGGATCTCCTAAAGTCTCCAGTAGCATGTTTT	intergenic							4.67111	3.29968
ASHGA5P036731	0.0308004	0.0775562	2.58109	up	noncoding	ENST00000565928	TSPY26P	GENCODE	3884	chr20	-	30774279	30778163	TTTGTCCAGTCACAAGGGGATCTGTGACACTTTTGTTTTCTATACGCATGATAAAAAATA	intergenic							5.51672	4.14874
ASHGA5P055907	0.0312047	0.0781687	2.57866	up	noncoding	ENST00000537850	AE000661.37	GENCODE	655	chr14	-	22887344	22901731	ATGGATGGCTGTAAGATTGATGTAATTAACATTTTATTTTCAGGGCCACAGTGCTGGTTG	intergenic							5.0979	3.73128
ASHGA5P036165	0.0112666	0.0436143	2.57672	up	noncoding	TCONS_00027301	XLOC_013301	LincRNAs identified by Cabili et al	815	chr19	-	33177953	33182862	TGAATGGACGAGCCAGATGCCAATTTATAAATTTCCTACTGCACACCTTGAATGTGAAAG	intergenic							5.84346	4.47792
ASHGA5P023411	0.000396861	0.00714737	2.57579	up	noncoding	ENST00000580372	RP11-6N17.6	GENCODE	396	chr17	-	46024167	46025638	TAAAAATATACTATCCCGGCCAAGCGTGGGCCTGGGTCCCAATCCCACACCCTCTCTTGA	natural antisense	NM_018129	PNPO	pyridoxine-5'-phosphate oxidase	+	46018888	46026674	4.48956	3.12454
ASHGA5P047091	0.00511869	0.0277644	2.57549	up	noncoding	ENST00000424422	RP11-324O2.4	GENCODE	551	chr10	-	114172052	114179765	GATCCTCTGTAGGGAACTTCCTTTTCTCTAATCCTAGATCTTTTCAAAAATTCTAACCAA	intronic antisense	NM_016234	ACSL5	long-chain-fatty-acid--CoA ligase 5 isoform a	+	114135955	114188138	5.43853	4.07368
ASHGA5P047091	0.00511869	0.0277644	2.57549	up	noncoding	ENST00000424422	RP11-324O2.4	GENCODE	551	chr10	-	114172052	114179765	GATCCTCTGTAGGGAACTTCCTTTTCTCTAATCCTAGATCTTTTCAAAAATTCTAACCAA	intronic antisense	NM_203379	ACSL5	long-chain-fatty-acid--CoA ligase 5 isoform b	+	114133915	114188138	5.43853	4.07368
ASHGA5P047091	0.00511869	0.0277644	2.57549	up	noncoding	ENST00000424422	RP11-324O2.4	GENCODE	551	chr10	-	114172052	114179765	GATCCTCTGTAGGGAACTTCCTTTTCTCTAATCCTAGATCTTTTCAAAAATTCTAACCAA	intronic antisense	NM_203380	ACSL5	long-chain-fatty-acid--CoA ligase 5 isoform b	+	114135022	114188138	5.43853	4.07368
ASHGA5P034905	0.00850735	0.0367391	2.5676	up	noncoding	ENST00000400892	NPPA-AS1	GENCODE	936	chr1	+	11903917	11908136	CTCAAGAGGCTCCCACTTCAAAGGTGTGAGAAGAGTAAAAAAGAGTCCTTGGTTATCTCA	natural antisense	NM_006172	NPPA	natriuretic peptides A preproprotein	-	11905766	11907840	7.47551	6.11509
ASHGA5P045028	0.0320317	0.0791994	2.56398	up	noncoding	ENST00000520913	PVT1	GENCODE	584	chr8	+	128902891	128944941	AGACATGGTACCTGATGGACACCAAGCTACGTACAGCTTCAAGGCCCCTTCTTTCTTTGC	intergenic							7.02888	5.67049
ASHGA5P029998	0.014557	0.0509026	2.56146	up	noncoding	ENST00000559003	CTD-2651B20.3	GENCODE	630	chr15	-	45543883	45548200	TGTAAGAACTTCTAACAGGTACATTCCTGTAAGCATTACCCACCACTGGACTAGGCACTG	intronic antisense	NM_004212	SLC28A2	sodium/nucleoside cotransporter 2	+	45544427	45568132	5.2639	3.90694
ASHGA5P019990	7.97091e-06	0.000839425	2.56126	up	noncoding	ENST00000506379	RP11-16N2.1	GENCODE	596	chr4	+	62009373	62019447	GGTAGAAACTATTCTCCTCATTAAACTACCTGCCCTCTGTAATGTAGCTCTTCTGTGCTG	intergenic							5.36325	4.00639
ASHGA5P047394	0.0302577	0.0769058	2.55943	up	noncoding	AI202367		LincRNAs identified by Khalil et al	445	chr2	+	18795945	18796390	TACTAAGCACAATAAAATAGGTAGATTCTTTACTGGGAACCAACCAGCAACAACAGGAAA	intergenic							4.84367	3.48785
ASHGA5P017042	0.00244732	0.018254	2.55823	up	noncoding	ENST00000436963	LINC00441	GENCODE	220	chr13	-	48876582	48877795	ATACAAAGAGTCTGACACTGTTATTGCCCATCTGAACTCGTCAACTGAGAAGGAAAGAGA	bidirectional	NM_000321	RB1	retinoblastoma-associated protein	+	48877882	49056026	5.0218	3.66666
ASHGA5P036276	0.0253362	0.0696931	2.55623	up	noncoding	ENST00000415236	AC009948.5	GENCODE	662	chr2	+	179278749	179297009	ACATTGATATTGTCCATTGGCGCTCAGTTCATCTGTAATGACACATTCAAGGATGACGAT	natural antisense	NM_001139517	PRKRA	interferon-inducible double stranded RNA-dependent protein kinase activator A isoform 2	-	179296140	179315484	4.99295	3.63894
ASHGA5P036276	0.0253362	0.0696931	2.55623	up	noncoding	ENST00000415236	AC009948.5	GENCODE	662	chr2	+	179278749	179297009	ACATTGATATTGTCCATTGGCGCTCAGTTCATCTGTAATGACACATTCAAGGATGACGAT	natural antisense	NM_001139518	PRKRA	interferon-inducible double stranded RNA-dependent protein kinase activator A isoform 3	-	179296140	179315355	4.99295	3.63894
ASHGA5P036276	0.0253362	0.0696931	2.55623	up	noncoding	ENST00000415236	AC009948.5	GENCODE	662	chr2	+	179278749	179297009	ACATTGATATTGTCCATTGGCGCTCAGTTCATCTGTAATGACACATTCAAGGATGACGAT	natural antisense	NM_003690	PRKRA	interferon-inducible double stranded RNA-dependent protein kinase activator A isoform 1	-	179296140	179315958	4.99295	3.63894
ASHGA5P041925	2.0725e-07	7.9627e-05	2.55532	up	noncoding	TCONS_00020937	XLOC_010208	LincRNAs identified by Cabili et al	614	chr12	-	115748570	115759015	AAGCAAAAGAGAGAAGAGTTTATTTCATTCTCAGCAGCATCCCTGGCCAGCCTCGTCAAA	intergenic							4.08781	2.7343
ASHGA5P017261	7.32725e-06	0.00080434	2.55355	up	noncoding	ENST00000439444	RP4-553F4.6	GENCODE	427	chr20	-	32375252	32398880	ATTATTTCCGTGAATTGTGACATCAACCTCGCCAGATCTTCCTGCTGTTAAACCCGTCCT	intronic antisense	NM_032819	ZNF341	zinc finger protein 341	+	32319807	32380075	4.0734	2.7209
ASHGA5P029216	0.0234587	0.0662519	2.55354	up	noncoding	ENST00000556578	RP4-647C14.3	GENCODE	777	chr14	-	73738889	73740789	AGCCCACTGAATAGCTCTTCCTAGACTCCCAAATATTTATTGACTGGATAATTAAACATC	natural antisense	NM_173462	PAPLN	papilin precursor	+	73704204	73741347	8.13289	6.78039
ASHGA5P028138	0.0125759	0.0465372	2.55043	up	noncoding	TCONS_00010083	XLOC_004540	LincRNAs identified by Cabili et al	344	chr5	+	126565032	126567810	CCGGGAAGAGAAAGCAGTTTTTGGACAACAGTTCCTTCACCTCAGCATTTTTCATGGATT	intergenic							5.77774	4.42699
ASHGA5P031762	0.00267533	0.0190654	2.54976	up	noncoding	ENST00000565327	RP11-327F22.5	GENCODE	352	chr16	+	50840578	50841540	ACCTGCCACTCTAGAAATCCAGAGAAGAGATTCCACTTGGATTAAGACTTGCATAAGTGG	intergenic							4.30256	2.9522
ASHGA5P032231	0.00822889	0.0359949	2.54655	up	noncoding	uc002gsn.2	BC038464	UCSC_knowngene	2161	chr17	-	18079875	18088067	TTAAATCAGCGTGTGCAAATGGAGTCTTCTCCTCCAGCCAATCCTTTACCTACCTACATG	intronic antisense	NM_016239	MYO15A	unconventional myosin-XV	+	18012019	18083116	4.72473	3.37618
ASHGA5P032231	0.00822889	0.0359949	2.54655	up	noncoding	uc002gsn.2	BC038464	UCSC_knowngene	2161	chr17	-	18079875	18088067	TTAAATCAGCGTGTGCAAATGGAGTCTTCTCCTCCAGCCAATCCTTTACCTACCTACATG	natural antisense	NM_017758	ALKBH5	probable alpha-ketoglutarate-dependent dioxygenase ABH5	+	18086866	18113267	4.72473	3.37618
ASHGA5P056089	0.00010771	0.00358071	2.54628	up	noncoding	TCONS_00027703	XLOC_013266	LincRNAs identified by Cabili et al	630	chr19	-	22427127	22428003	TCCTGGGCCTCCTCTTTGTATGAATGTCATAAAGAGTTATCAATCTGACTGGGCAGTGTG	intergenic							5.49007	4.14168
ASHGA5P036348	0.00147744	0.014134	2.54618	up	noncoding	ENST00000568571	RP11-469M7.1	GENCODE	2666	chr2	+	201689395	201692061	CTTCTTGTCTGTACCCTTGAAATGGAATAAAATTTCATGAGACTCCTTGTTAATGTAGAG	intergenic							7.93369	6.58536
ASHGA5P023386	0.00512752	0.0277959	2.54524	up	noncoding	ENST00000579933	RP11-835E18.5	GENCODE	977	chr18	-	5232874	5238525	TCTTCAATAGATATTTTATATTCTGTATGTGATAATTCTGAATCCTTGAGAATCAATATC	intergenic							5.98326	4.63546
ASHGA5P040350	0.0136757	0.0487453	2.54356	up	noncoding	ENST00000430907	FTH1P10	pseudogene	550	chr5	-	17353983	17354533	AATCTAGCTTGGCGGAATATCTCTTTGACCAGCACACCCTGGGAGACAGTGATAATGAAA								10.3841	9.03724
ASHGA5P019693	0.0417681	0.0922526	2.54324	up	noncoding	uc003idi.4	AF085995	UCSC_knowngene	456	chr4	+	120433527	120473183	CCAAATGCCTTACTTGACAGGATCACAGAATGTGAATTTTGAACAGATCTGAAAAGTTAT	intronic antisense	NM_001083	PDE5A	cGMP-specific 3',5'-cyclic phosphodiesterase isoform 1	-	120415549	120549981	5.2562	3.90953
ASHGA5P019693	0.0417681	0.0922526	2.54324	up	noncoding	uc003idi.4	AF085995	UCSC_knowngene	456	chr4	+	120433527	120473183	CCAAATGCCTTACTTGACAGGATCACAGAATGTGAATTTTGAACAGATCTGAAAAGTTAT	intronic antisense	NM_033430	PDE5A	cGMP-specific 3',5'-cyclic phosphodiesterase isoform 2	-	120415549	120548442	5.2562	3.90953
ASHGA5P019693	0.0417681	0.0922526	2.54324	up	noncoding	uc003idi.4	AF085995	UCSC_knowngene	456	chr4	+	120433527	120473183	CCAAATGCCTTACTTGACAGGATCACAGAATGTGAATTTTGAACAGATCTGAAAAGTTAT	intronic antisense	NM_033437	PDE5A	cGMP-specific 3',5'-cyclic phosphodiesterase isoform 3	-	120415549	120549239	5.2562	3.90953
ASHGA5P036772	0.0154194	0.0526878	2.5403	up	noncoding	ENST00000419993	RP11-109P14.10	GENCODE	481	chr1	+	38326368	38327252	TTGCTGGCCCAGAAAATCCCACTTGTTTCACCGAACACTCATTTTTTCAGTGATTTTACA	natural antisense	NM_005540	INPP5B	type II inositol 1,4,5-trisphosphate 5-phosphatase precursor	-	38326368	38412729	6.08665	4.74165
ASHGA5P020855	0.00136846	0.0136076	2.53915	up	noncoding	NR_028495	LYRM2	RefSeq	5381	chr6	-	90341942	90348216	AGTGCCCACGTTCGTAAGAAGGCAACAAGTTCTTCTCCTCTACAGAAGGATTTTGCAAAC	exon sense-overlapping	NM_020466	LYRM2	LYR motif-containing protein 2	-	90341942	90348474	4.97555	3.6312
ASHGA5P020855	0.00136846	0.0136076	2.53915	up	noncoding	NR_028495	LYRM2	RefSeq	5381	chr6	-	90341942	90348216	AGTGCCCACGTTCGTAAGAAGGCAACAAGTTCTTCTCCTCTACAGAAGGATTTTGCAAAC	natural antisense	NM_001242809	ANKRD6	ankyrin repeat domain-containing protein 6 isoform a	+	90142896	90343553	4.97555	3.6312
ASHGA5P020855	0.00136846	0.0136076	2.53915	up	noncoding	NR_028495	LYRM2	RefSeq	5381	chr6	-	90341942	90348216	AGTGCCCACGTTCGTAAGAAGGCAACAAGTTCTTCTCCTCTACAGAAGGATTTTGCAAAC	natural antisense	NM_001242811	ANKRD6	ankyrin repeat domain-containing protein 6 isoform a	+	90272036	90343553	4.97555	3.6312
ASHGA5P020855	0.00136846	0.0136076	2.53915	up	noncoding	NR_028495	LYRM2	RefSeq	5381	chr6	-	90341942	90348216	AGTGCCCACGTTCGTAAGAAGGCAACAAGTTCTTCTCCTCTACAGAAGGATTTTGCAAAC	natural antisense	NM_001242813	ANKRD6	ankyrin repeat domain-containing protein 6 isoform c	+	90142896	90343553	4.97555	3.6312
ASHGA5P020855	0.00136846	0.0136076	2.53915	up	noncoding	NR_028495	LYRM2	RefSeq	5381	chr6	-	90341942	90348216	AGTGCCCACGTTCGTAAGAAGGCAACAAGTTCTTCTCCTCTACAGAAGGATTTTGCAAAC	natural antisense	NM_001242814	ANKRD6	ankyrin repeat domain-containing protein 6 isoform d	+	90276556	90343553	4.97555	3.6312
ASHGA5P020855	0.00136846	0.0136076	2.53915	up	noncoding	NR_028495	LYRM2	RefSeq	5381	chr6	-	90341942	90348216	AGTGCCCACGTTCGTAAGAAGGCAACAAGTTCTTCTCCTCTACAGAAGGATTTTGCAAAC	natural antisense	NM_014942	ANKRD6	ankyrin repeat domain-containing protein 6 isoform b	+	90142896	90343553	4.97555	3.6312
ASHGA5P015969	0.0106006	0.0420784	2.53876	up	noncoding	ENST00000425309	RP11-475I24.3	GENCODE	257	chr9	+	44402459	44403260	GGACGTAGTTATTAAATGCTGTTTTCCATGACCGTCTCTGTTCTTCCCATACGCGAATGG	intergenic							8.18785	6.84372
ASHGA5P051515	3.50993e-05	0.00182854	2.53867	up	noncoding	ENST00000456620	AL592284.1	GENCODE	490	chr1	-	144460625	144461412	GGAAGCACAACAGGGACAGACTTGAAGGCACCTGGGCAGTCCTCTGGTTTTGGAGTAGAG	intronic antisense	ENST00000538264	AL592284.2	Uncharacterized protein [Source:UniProtKB/TrEMBL;Acc:F5H305]	+	144339737	144521058	4.74747	3.40339
ASHGA5P027668	0.0261195	0.0707567	2.53738	up	noncoding	TCONS_00017369	XLOC_008233	LincRNAs identified by Cabili et al	285	chrX	-	128809963	128812358	TTGTGTTTGTCTTGGGGACTGTTCCGTCAGAATGAGCAGCTTAAAAAATGTCGCCTGTGA	intergenic							5.38127	4.03793
ASHGA5P016579	6.25956e-06	0.000724802	2.52762	up	noncoding	ENST00000431856	AC098820.3	GENCODE	584	chr2	-	217352526	217363473	TTATTTCACATATATCACAAAATCCTGCAAAGGGTCTGTCCCCATTGGATCACCTCCCAT	natural antisense	ENST00000491306	RPL37A	ribosomal protein L37a [Source:HGNC Symbol;Acc:10348]	+	217362911	217368274	4.33997	3.00219
ASHGA5P033742	0.0475749	0.0995406	2.52728	up	noncoding	ENST00000582435	RP11-692N5.1	GENCODE	379	chr18	+	9615261	9619361	CCTGCTGGAATCACTACTGTAAACTGAGTATAAAGGAAAATAAACCCTCTTTTTCTTATC	bidirectional	NM_001042388	PPP4R1	serine/threonine-protein phosphatase 4 regulatory subunit 1 isoform a	-	9546788	9614605	6.04937	4.71179
ASHGA5P033742	0.0475749	0.0995406	2.52728	up	noncoding	ENST00000582435	RP11-692N5.1	GENCODE	379	chr18	+	9615261	9619361	CCTGCTGGAATCACTACTGTAAACTGAGTATAAAGGAAAATAAACCCTCTTTTTCTTATC	bidirectional	NM_005134	PPP4R1	serine/threonine-protein phosphatase 4 regulatory subunit 1 isoform b	-	9546788	9614605	6.04937	4.71179
ASHGA5P055560	0.00714884	0.0332685	2.5144	up	noncoding	NR_038385	LOC728084	RefSeq	2509	chr12	-	89404902	89413469	CTTCACGTAGCTTGCGTCGCTGCTCCTGTCTCCGTGTAACTCACAATAAAGAGATTTTGG	intergenic							5.23392	3.90371
ASHGA5P039556	0.00296741	0.0202986	2.50799	up	noncoding	ENST00000485827	AC004057.1	pseudogene	348	chr4	-	114135201	114135549	CTGTGCCCGATGCGTGCCCAAGGACAAGGCCATTAAGAAATTCGTCATTCGAAACATAGT								9.69799	8.37146
ASHGA5P034716	0.019404	0.0598234	2.50705	up	noncoding	ENST00000451217	RP1-150O5.3	GENCODE	456	chr1	-	23875629	23877406	CTTAACATACCATGTGAAGGTTGTGTTCTCTTACATTCTATAGCCCTCTGTGTTTTAATA	intergenic							5.31599	3.98999
ASHGA5P014948	0.00203978	0.0166893	2.50411	up	noncoding	NR_037174	LOC100507463	RefSeq	1360	chr6	+	32811862	32814277	ACAGTAAGAGTTTCAGAGTGCTGGCCACACCAAAGCATCAGCCCTGGCTCTAAACTCCGT	intronic antisense	NM_004159	PSMB8	proteasome subunit beta type-8 isoform E1 proprotein	-	32808493	32812712	5.92966	4.60537
ASHGA5P014948	0.00203978	0.0166893	2.50411	up	noncoding	NR_037174	LOC100507463	RefSeq	1360	chr6	+	32811862	32814277	ACAGTAAGAGTTTCAGAGTGCTGGCCACACCAAAGCATCAGCCCTGGCTCTAAACTCCGT	natural antisense	NM_000593	TAP1	antigen peptide transporter 1	-	32812985	32821748	5.92966	4.60537
ASHGA5P055818	0.0296778	0.0760798	2.50225	up	noncoding	NR_038991	RBM26-AS1	RefSeq	2484	chr13	+	79980443	79998468	AATTCGGAAATGATTTTGAAAATTGTGTTGGTTTTTAATGTAAGTTTATATGTCAGCTTT	bidirectional	NM_022118	RBM26	RNA-binding protein 26	-	79894099	79979923	4.98594	3.66272
ASHGA5P046836	0.000424665	0.00751034	2.50022	up	noncoding	uc004fwv.3	GOLGA2P2Y	UCSC_knowngene	1060	chrY	+	27601457	27606322	AGTACATCAGCCAGGGGGCAGTGCCAAAGACGCAGCACTGGGAGAGGAGGACATCGTCAG	intergenic							4.16341	2.84135
ASHGA5P032833	0.0213362	0.0627543	2.49746	up	noncoding	ENST00000578788	CTB-41I6.2	GENCODE	557	chr17	+	8870839	8880312	CCCTAATGCAAATTCTCTGTGGTTAGGAATAAAAGGAGACTTTGTCAACATGATAAATGA	intergenic							5.46142	4.14096
ASHGA5P040939	0.0315444	0.0786446	2.49426	up	noncoding	uc011cly.2	BC013821	UCSC_knowngene	2682	chr5	+	478317	480999	CCAGGGCAAATTGTATGTGCTCCTTACTGGGTTTATTATAAGTGTCACATGTTTTTTATA	natural antisense	NM_004174	SLC9A3	sodium/hydrogen exchanger 3	-	473333	524549	6.63121	5.31259
ASHGA5P039923	0.0464328	0.0981786	2.49397	up	noncoding	TCONS_00023171	XLOC_011119	LincRNAs identified by Cabili et al	945	chr14	-	99750983	99753677	GCCGATGTCATCTAGAACTCTGGGGGATTGGGGGAAAACGAACAGAACCAGATTAAAAAA	intergenic							7.70135	6.38291
ASHGA5P027203	0.000279642	0.00594078	2.49027	up	noncoding	TCONS_00011694	XLOC_005173	LincRNAs identified by Cabili et al	820	chr6	+	11934222	11961218	TTTCAATGACTTGTGCCCTGCCAGCTCTAGCTTTTGAAGGGTCTACACTCATCATCAACA	intergenic							5.06512	3.74882
ASHGA5P057422	0.0263262	0.0710389	2.4897	up	noncoding	TCONS_00017180	XLOC_007992	LincRNAs identified by Cabili et al	307	chrX	+	56098008	56231479	GAATGTTTAGAAGCTGGGCAGAGAAATCGAGCTGCAAAATGACCTACAGATATTACAGTT	intron sense-overlapping	ENST00000433279	AL353698.1	Uncharacterized protein [Source:UniProtKB/TrEMBL;Acc:E7EML2]	+	56100756	56102014	5.38108	4.0651
ASHGA5P058053	0.00421958	0.0248665	2.48896	up	noncoding	TCONS_00025791	XLOC_012065	LincRNAs identified by Cabili et al	309	chr17	+	56208	56601	CTTATGGCACCTCGATGAGGAAACGTGATTGGGCGAGTGTTTCTCACGGCACCTCGATGG	intergenic							5.70911	4.39357
ASHGA5P051703	0.00462797	0.0261766	2.48774	up	noncoding	NR_040762	ZIC4	RefSeq	3436	chr3	-	147103834	147110217	ATTGGGGCTCGGTCCGGCCAATATTGTCACTCTAACGTGCACTCGCGCCTTCCCTCGGCT	exon sense-overlapping	NM_001168378	ZIC4	zinc finger protein ZIC 4 isoform 1 precursor	-	147103834	147122071	5.7976	4.48276
ASHGA5P051703	0.00462797	0.0261766	2.48774	up	noncoding	NR_040762	ZIC4	RefSeq	3436	chr3	-	147103834	147110217	ATTGGGGCTCGGTCCGGCCAATATTGTCACTCTAACGTGCACTCGCGCCTTCCCTCGGCT	exon sense-overlapping	NM_001168379	ZIC4	zinc finger protein ZIC 4 isoform 2	-	147103834	147123307	5.7976	4.48276
ASHGA5P051703	0.00462797	0.0261766	2.48774	up	noncoding	NR_040762	ZIC4	RefSeq	3436	chr3	-	147103834	147110217	ATTGGGGCTCGGTCCGGCCAATATTGTCACTCTAACGTGCACTCGCGCCTTCCCTCGGCT	exon sense-overlapping	NM_001243256	ZIC4	zinc finger protein ZIC 4 isoform 4	-	147103834	147124596	5.7976	4.48276
ASHGA5P051703	0.00462797	0.0261766	2.48774	up	noncoding	NR_040762	ZIC4	RefSeq	3436	chr3	-	147103834	147110217	ATTGGGGCTCGGTCCGGCCAATATTGTCACTCTAACGTGCACTCGCGCCTTCCCTCGGCT	exon sense-overlapping	NM_032153	ZIC4	zinc finger protein ZIC 4 isoform 3	-	147103834	147124596	5.7976	4.48276
ASHGA5P011073	0.000950003	0.0113914	2.48622	up	noncoding	ENST00000369120	BVES-AS1	GENCODE	324	chr6	+	105585697	105606912	CTGCTCCCCTGTTGAAGAGGAGAGAAAAATTCTTCAAGCTGGAGAACTACTTGATCTTAA	intronic antisense	NM_022361	POPDC3	popeye domain-containing protein 3	-	105605774	105627858	6.88047	5.56651
ASHGA5P049778	0.0434068	0.0945989	2.48469	up	noncoding	ENST00000579003	hsa-mir-142	GENCODE	1625	chr17	-	56408244	56409869	CGGACAGACAGACAGTGCAGTCACCCATAAAGTAGAAAGCACTACTAACAGCACTGGAGG	intergenic							7.88206	6.56899
ASHGA5P047324	4.82e-09	7.408e-06	2.48054	up	noncoding	ENST00000438202	RP11-534G20.3	GENCODE	652	chr10	+	29698530	29747716	TGGCTCTGAAAGAAAAGGGATCGCCCAAAGCCCTGCAGTTGTCTGGACTTTTAATTTTTA	natural antisense	NM_003174	SVIL	supervillin isoform 1	-	29746276	30024730	4.19654	2.88588
ASHGA5P047324	4.82e-09	7.408e-06	2.48054	up	noncoding	ENST00000438202	RP11-534G20.3	GENCODE	652	chr10	+	29698530	29747716	TGGCTCTGAAAGAAAAGGGATCGCCCAAAGCCCTGCAGTTGTCTGGACTTTTAATTTTTA	natural antisense	NM_021738	SVIL	supervillin isoform 2	-	29746276	29923901	4.19654	2.88588
ASHGA5P025917	0.0389178	0.0882807	2.47923	up	noncoding	NR_046314	BLOC1S2	RefSeq	2787	chr10	-	102033034	102046469	TTAGAAGTAGCCACCAGTGAAGACTATAAGCTCCTGGAAAATATGAATAAACTCACCAGC	exon sense-overlapping	NM_173809	BLOC1S2	biogenesis of lysosome-related organelles complex 1 subunit 2	-	102033034	102046469	4.69703	3.38714
ASHGA5P027250	0.0298663	0.076224	2.47814	up	noncoding	TCONS_00011743	XLOC_005208	LincRNAs identified by Cabili et al	4186	chr6	+	25992967	26002137	CTGCTGTTCAACTGATGATGTGTGAGCTGTCAGTAGTTCAAACTAGTCATTATCTTTATG	intergenic							5.60528	4.29602
ASHGA5P023057	0.0254545	0.0698351	2.46989	up	noncoding	ENST00000568739	AC137934.1	GENCODE	666	chr16	+	90282279	90289086	AAGCTGCCTCGAGGAACAGTAAGAGGACCTTGTGCATGAATAATTTGTTTCCACACTGCA	intergenic							5.1772	3.87276
ASHGA5P014676	0.00320481	0.0212448	2.46893	up	noncoding	ENST00000412393	LINC00342	GENCODE	654	chr2	-	96472865	96480524	TCTTTGGGGATTCCAGGAACAAAGATCACCACAACTGGCTCCCCTTCAACTATGTTAGAT	intergenic							6.54687	5.24298
ASHGA5P015708	0.0446118	0.0958383	2.46891	up	noncoding	ENST00000422825	ZNF815P	GENCODE	805	chr7	+	5886952	5893996	CTAGGCAGAGAAAGCTGACTTCATGAGACCGAGGATCTCGTTCGTTGATCGATGCTACAT	intergenic							4.982	3.67813
ASHGA5P030887	0.0291995	0.0754074	2.46812	up	noncoding	ENST00000562232	RP11-20I23.6	GENCODE	459	chr16	-	2619043	2621937	TAAGTGGCTACAGGGCAACAAGACTATCCCTGTGCCAAATACCAGATTCCAAAGAAACTC	intronic antisense	NM_001261816	PDPK1	3-phosphoinositide-dependent protein kinase 1 isoform 3	+	2587964	2653191	4.81803	3.51462
ASHGA5P030887	0.0291995	0.0754074	2.46812	up	noncoding	ENST00000562232	RP11-20I23.6	GENCODE	459	chr16	-	2619043	2621937	TAAGTGGCTACAGGGCAACAAGACTATCCCTGTGCCAAATACCAGATTCCAAAGAAACTC	intronic antisense	NM_002613	PDPK1	3-phosphoinositide-dependent protein kinase 1 isoform 1	+	2587964	2653191	4.81803	3.51462
ASHGA5P030887	0.0291995	0.0754074	2.46812	up	noncoding	ENST00000562232	RP11-20I23.6	GENCODE	459	chr16	-	2619043	2621937	TAAGTGGCTACAGGGCAACAAGACTATCCCTGTGCCAAATACCAGATTCCAAAGAAACTC	intronic antisense	NM_031268	PDPK1	3-phosphoinositide-dependent protein kinase 1 isoform 2	+	2587964	2653191	4.81803	3.51462
ASHGA5P019155	0.0190113	0.0591745	2.46708	up	noncoding	NR_047553	UBE2V1	RefSeq	2593	chr20	-	48697660	48732496	GCCTCCAAGATTTCAGTTTATATATTTGAACCCCCTCTGATGCTGTTTAACCCCTCTAAA	exon sense-overlapping	NM_001032288	UBE2V1	ubiquitin-conjugating enzyme E2 variant 1 isoform d	-	48697660	48729735	12.7735	11.4707
ASHGA5P019155	0.0190113	0.0591745	2.46708	up	noncoding	NR_047553	UBE2V1	RefSeq	2593	chr20	-	48697660	48732496	GCCTCCAAGATTTCAGTTTATATATTTGAACCCCCTCTGATGCTGTTTAACCCCTCTAAA	exon sense-overlapping	NM_001257393	UBE2V1	ubiquitin-conjugating enzyme E2 variant 1 isoform a	-	48697660	48732496	12.7735	11.4707
ASHGA5P019155	0.0190113	0.0591745	2.46708	up	noncoding	NR_047553	UBE2V1	RefSeq	2593	chr20	-	48697660	48732496	GCCTCCAAGATTTCAGTTTATATATTTGAACCCCCTCTGATGCTGTTTAACCCCTCTAAA	exon sense-overlapping	NM_001257394	UBE2V1	ubiquitin-conjugating enzyme E2 variant 1 isoform c	-	48697660	48732496	12.7735	11.4707
ASHGA5P019155	0.0190113	0.0591745	2.46708	up	noncoding	NR_047553	UBE2V1	RefSeq	2593	chr20	-	48697660	48732496	GCCTCCAAGATTTCAGTTTATATATTTGAACCCCCTCTGATGCTGTTTAACCCCTCTAAA	exon sense-overlapping	NM_001257395	UBE2V1	ubiquitin-conjugating enzyme E2 variant 1 isoform e	-	48697660	48729735	12.7735	11.4707
ASHGA5P019155	0.0190113	0.0591745	2.46708	up	noncoding	NR_047553	UBE2V1	RefSeq	2593	chr20	-	48697660	48732496	GCCTCCAAGATTTCAGTTTATATATTTGAACCCCCTCTGATGCTGTTTAACCCCTCTAAA	exon sense-overlapping	NM_001257396	UBE2V1	ubiquitin-conjugating enzyme E2 variant 1 isoform f	-	48697660	48729735	12.7735	11.4707
ASHGA5P019155	0.0190113	0.0591745	2.46708	up	noncoding	NR_047553	UBE2V1	RefSeq	2593	chr20	-	48697660	48732496	GCCTCCAAGATTTCAGTTTATATATTTGAACCCCCTCTGATGCTGTTTAACCCCTCTAAA	exon sense-overlapping	NM_001257397	UBE2V1	ubiquitin-conjugating enzyme E2 variant 1 isoform g	-	48697660	48729735	12.7735	11.4707
ASHGA5P019155	0.0190113	0.0591745	2.46708	up	noncoding	NR_047553	UBE2V1	RefSeq	2593	chr20	-	48697660	48732496	GCCTCCAAGATTTCAGTTTATATATTTGAACCCCCTCTGATGCTGTTTAACCCCTCTAAA	exon sense-overlapping	NM_001257398	UBE2V1	ubiquitin-conjugating enzyme E2 variant 1 isoform g	-	48697660	48729735	12.7735	11.4707
ASHGA5P019155	0.0190113	0.0591745	2.46708	up	noncoding	NR_047553	UBE2V1	RefSeq	2593	chr20	-	48697660	48732496	GCCTCCAAGATTTCAGTTTATATATTTGAACCCCCTCTGATGCTGTTTAACCCCTCTAAA	exon sense-overlapping	NM_001257399	UBE2V1	ubiquitin-conjugating enzyme E2 variant 1 isoform g	-	48697660	48729735	12.7735	11.4707
ASHGA5P019155	0.0190113	0.0591745	2.46708	up	noncoding	NR_047553	UBE2V1	RefSeq	2593	chr20	-	48697660	48732496	GCCTCCAAGATTTCAGTTTATATATTTGAACCCCCTCTGATGCTGTTTAACCCCTCTAAA	exon sense-overlapping	NM_021988	UBE2V1	ubiquitin-conjugating enzyme E2 variant 1 isoform a	-	48697660	48732496	12.7735	11.4707
ASHGA5P019155	0.0190113	0.0591745	2.46708	up	noncoding	NR_047553	UBE2V1	RefSeq	2593	chr20	-	48697660	48732496	GCCTCCAAGATTTCAGTTTATATATTTGAACCCCCTCTGATGCTGTTTAACCCCTCTAAA	exon sense-overlapping	NM_022442	UBE2V1	ubiquitin-conjugating enzyme E2 variant 1 isoform c	-	48697660	48732496	12.7735	11.4707
ASHGA5P019155	0.0190113	0.0591745	2.46708	up	noncoding	NR_047553	UBE2V1	RefSeq	2593	chr20	-	48697660	48732496	GCCTCCAAGATTTCAGTTTATATATTTGAACCCCCTCTGATGCTGTTTAACCCCTCTAAA	exon sense-overlapping	NM_199144	UBE2V1	ubiquitin-conjugating enzyme E2 variant 1 isoform a	-	48697660	48732496	12.7735	11.4707
ASHGA5P019155	0.0190113	0.0591745	2.46708	up	noncoding	NR_047553	UBE2V1	RefSeq	2593	chr20	-	48697660	48732496	GCCTCCAAGATTTCAGTTTATATATTTGAACCCCCTCTGATGCTGTTTAACCCCTCTAAA	exon sense-overlapping	NM_199203	TMEM189-UBE2V1	TMEM189-UBE2V1 fusion protein	-	48697660	48770335	12.7735	11.4707
ASHGA5P044373	0.029816	0.0762011	2.46699	up	noncoding	ENST00000524052	RP11-317J10.2	GENCODE	430	chr8	-	86368851	86375283	TTTTTACCATTTCACACAAACTTTTAAAGATTATTCCACGCCGTTAGCTCTGTGCTTCTA	bidirectional	NM_000067	CA2	carbonic anhydrase 2	+	86376130	86393721	4.80161	3.49886
ASHGA5P016315	3.2192e-05	0.00172583	2.46435	up	noncoding	ENST00000429224	RP11-611D20.2	GENCODE	738	chr9	+	139440663	139443901	ACTGAAATTTGCATAGAAGAGAGTGGCCCATTCGGTGTCCACCCGTCAGGCCACCCAGCA	bidirectional	NM_017617	NOTCH1	neurogenic locus notch homolog protein 1 preproprotein	-	139388895	139440238	4.2736	2.97239
ASHGA5P029674	0.00230043	0.0177041	2.45817	up	noncoding	ENST00000500215	RP11-7F17.5	GENCODE	2921	chr14	+	77507406	77535846	AGCAATAAAAATAAACCAATCCCAGACGGATTGTACTTCTTCCTGTCCTCATTTCTACCC	intergenic							4.45948	3.16189
ASHGA5P019208	0.0226951	0.0649104	2.45534	up	noncoding	ENST00000473164	AC016629.2	GENCODE	944	chr19	+	59086822	59110942	CAGAGACAAGACGGCACCGAAAGCGAAGGAAGCTCCTGCTCCTCCTAAAGCCGAAGCCAA	intergenic							7.35194	6.05602
ASHGA5P028353	4.41297e-06	0.000581314	2.45375	up	noncoding	ENST00000437308	RP4-655J12.4	GENCODE	539	chr1	-	116995655	117009064	TGTTTTTGGAAGCTGAAAACTTACTTCGGCAACAACAGTCCTCCATGGCTCCCTGTTTGT	intergenic							4.55672	3.26173
ASHGA5P038364	0.00291197	0.0201284	2.4528	up	noncoding	TCONS_00024536	XLOC_011849	LincRNAs identified by Cabili et al	1611	chr16	-	1041084	1043057	CTTGTCAGTTCCTTGCCCTGCCATTTTCTGTCTAATTAATTCTTTTATTGTGCACCGGAT	intergenic							8.70498	7.41055
ASHGA5P054299	0.0209188	0.0622046	2.45103	up	noncoding	ENST00000454631	RP11-295G20.2	GENCODE	458	chr1	-	231658262	231664302	TCTACAAGCCTCACAGCATGCACTGTTACTAAAAAGACGATGCGTCCTCCTGGACCTGAG	natural antisense	ENST00000366639	TSNAX	translin-associated factor X [Source:HGNC Symbol;Acc:12380]	+	231664286	231702270	5.66104	4.36765
ASHGA5P028009	0.031931	0.0790857	2.4492	up	noncoding	TCONS_00009438	XLOC_004451	LincRNAs identified by Cabili et al	1242	chr5	+	85814415	85815676	ATGGGGATAAGATTGACATTGCTGTCGCAGTATTGCAAAAACATGACTAATTTGGTTAAT	intergenic							4.71844	3.42613
ASHGA5P014701	0.0188583	0.0589266	2.44895	up	noncoding	ENST00000412631	RP11-111F5.4	GENCODE	256	chr9	-	46686628	46687427	GGACGTAGTTATCAAATGCTGTTTTCCATGACTGTCTCTGTTCTTCCCATACGCGAATGG	intergenic							9.18559	7.89343
ASHGA5P028422	0.000177899	0.00473889	2.44768	up	noncoding	uc001ayw.3	AB1	UCSC_knowngene	1161	chr1	-	16888921	16890082	TAGGAGGTAATTACCAGACAACTGCAGAATGTAGAACACTGAGCAGGACAACTGACCTGT	intergenic							4.56583	3.27442
ASHGA5P033136	0.0197873	0.0603769	2.44456	up	noncoding	ENST00000563394	RP5-882C2.2	GENCODE	1796	chr17	+	42299282	42301078	CCAAGGGGCTTTTCGGTAAAGTGCTTTGGAATAAAACAGGATGAACATGAATCATAAGAA	bidirectional	ENST00000302904	UBTF	upstream binding transcription factor, RNA polymerase I [Source:HGNC Symbol;Acc:12511]	-	42282400	42298994	7.19641	5.90683
ASHGA5P033136	0.0197873	0.0603769	2.44456	up	noncoding	ENST00000563394	RP5-882C2.2	GENCODE	1796	chr17	+	42299282	42301078	CCAAGGGGCTTTTCGGTAAAGTGCTTTGGAATAAAACAGGATGAACATGAATCATAAGAA	bidirectional	ENST00000343638	UBTF	upstream binding transcription factor, RNA polymerase I [Source:HGNC Symbol;Acc:12511]	-	42282400	42298331	7.19641	5.90683
ASHGA5P028214	2.62182e-05	0.00156986	2.44407	up	noncoding	ENST00000552353	RP11-511B23.1	GENCODE	898	chr12	+	93396902	93413596	CATCCACGCCTTGCCAGTCATTTGCATCTTAGTAAGACTAAAACTAATAAAACTAACAAT	intergenic							6.65341	5.36412
ASHGA5P026688	0.0262355	0.0709207	2.44249	up	noncoding	ENST00000533528	RP11-113K21.5	GENCODE	340	chr11	+	82783145	82803380	GAAACTCCAGTTGTTTACTATTATTATTAAAGTGGGAAACGGAGTTCGTTGATCAAATGG	bidirectional	NM_014488	RAB30	ras-related protein Rab-30	-	82692477	82782884	5.74833	4.45997
ASHGA5P051481	0.000306206	0.00620555	2.44025	up	noncoding	ENST00000444754	BX004987.3	GENCODE	776	chr1	+	143361707	143376737	ATATTACCTTAGCAGTGTGTCCCCAAGAAAGTGTCAGAGCCTTTACGTGGACCTTCTCAT	intergenic							5.72863	4.44161
ASHGA5P015141	9.4485e-05	0.00333811	2.43971	up	noncoding	ENST00000417232	RP11-344E13.3	GENCODE	709	chr17	+	20771817	20827738	TTAATGAACAATAGTTTCCCTTGCAAAGTTATCAAAGTGCTCCCCAGAAGACATTAGGTA	intronic antisense	NM_001004306	CCDC144NL	putative coiled-coil domain-containing protein 144 N-terminal-like	-	20766707	20799453	4.90778	3.62107
ASHGA5P031738	0.00104489	0.0117963	2.4394	up	noncoding	ENST00000451690	RP11-139E24.1	GENCODE	276	chr1	-	192906429	192917387	ATTTATTCTCCCACTGGCATGAAAGCTGTGATTCTGACCACCTTCTACATCACTGTCTAC	intergenic							5.66847	4.38194
ASHGA5P031890	1.40458e-05	0.0011343	2.43931	up	noncoding	TCONS_00006619	XLOC_003225	LincRNAs identified by Cabili et al	1185	chr3	-	120084473	120086653	AATGTTTTTGAACTATTTTCCCCAAAGCCCACCTCATAGGTTGCCACTGATGACCAGGTG	intergenic							4.66831	3.38184
ASHGA5P047128	0.00227313	0.0176436	2.43679	up	noncoding	NR_033850	WDR11-AS1	RefSeq	2500	chr10	-	122521323	122610691	ACACTGCATATCTGGTGTTTGCAATACTCCCTTCGCACTTGAGGAAGAAGCACTATGTCT	natural antisense	NM_018117	WDR11	WD repeat-containing protein 11	+	122610686	122669038	5.95474	4.66976
ASHGA5P042576	0.0194123	0.0598234	2.43463	up	noncoding	NR_034110	TRAF3IP2-AS1	RefSeq	2195	chr6	+	111804674	111899383	AGTGATAAAATAGATCAAGAAGATCAGAACAGGCTTAAATTGATGCTATAAAACCAATTA	intronic antisense	NM_001164281	TRAF3IP2	adapter protein CIKS isoform 3	-	111876580	111927477	5.60758	4.32388
ASHGA5P042576	0.0194123	0.0598234	2.43463	up	noncoding	NR_034110	TRAF3IP2-AS1	RefSeq	2195	chr6	+	111804674	111899383	AGTGATAAAATAGATCAAGAAGATCAGAACAGGCTTAAATTGATGCTATAAAACCAATTA	intronic antisense	NM_001164283	TRAF3IP2	adapter protein CIKS isoform 5	-	111876580	111888563	5.60758	4.32388
ASHGA5P042576	0.0194123	0.0598234	2.43463	up	noncoding	NR_034110	TRAF3IP2-AS1	RefSeq	2195	chr6	+	111804674	111899383	AGTGATAAAATAGATCAAGAAGATCAGAACAGGCTTAAATTGATGCTATAAAACCAATTA	intronic antisense	NM_147686	TRAF3IP2	adapter protein CIKS isoform 2	-	111876580	111927477	5.60758	4.32388
ASHGA5P039205	0.0297859	0.0761451	2.43364	up	noncoding	ENST00000561748	RP4-575N6.5	GENCODE	592	chr1	+	101708713	101709305	TAAATACCTTGAGGGAGGAATCACAAATAACTAAAAGAAACTTTTGTAGAGACTATCAGA	intergenic							5.34137	4.05826
ASHGA5P043265	0.035983	0.0842987	2.43346	up	noncoding	uc003vcq.1	AF520792	UCSC_knowngene	413	chr7	-	104754024	104754437	GTATTGCATTTTTATACCTAAGATGCATTCACAGAACTGCTGCTGACAGGAAAGAAAAAA	natural antisense	NM_018682	MLL5	histone-lysine N-methyltransferase MLL5	+	104654636	104754532	6.34487	5.06186
ASHGA5P043265	0.035983	0.0842987	2.43346	up	noncoding	uc003vcq.1	AF520792	UCSC_knowngene	413	chr7	-	104754024	104754437	GTATTGCATTTTTATACCTAAGATGCATTCACAGAACTGCTGCTGACAGGAAAGAAAAAA	natural antisense	NM_182931	MLL5	histone-lysine N-methyltransferase MLL5	+	104654636	104754532	6.34487	5.06186
ASHGA5P020194	0.0376427	0.0863875	2.43189	up	noncoding	NR_028383	TIMM8B	RefSeq	1155	chr11	-	111955538	111957522	CTCACAAATAGTGCATCACTTCATGGAGTTATGTTGGGATAAATGTGTGGAGAAGCCAGG	exon sense-overlapping	NM_012459	TIMM8B	mitochondrial import inner membrane translocase subunit Tim8 B	-	111955538	111957522	6.24252	4.96044
ASHGA5P020194	0.0376427	0.0863875	2.43189	up	noncoding	NR_028383	TIMM8B	RefSeq	1155	chr11	-	111955538	111957522	CTCACAAATAGTGCATCACTTCATGGAGTTATGTTGGGATAAATGTGTGGAGAAGCCAGG	natural antisense	NM_001082969	C11orf57	uncharacterized protein C11orf57 isoform a	+	111944967	111955874	6.24252	4.96044
ASHGA5P020194	0.0376427	0.0863875	2.43189	up	noncoding	NR_028383	TIMM8B	RefSeq	1155	chr11	-	111955538	111957522	CTCACAAATAGTGCATCACTTCATGGAGTTATGTTGGGATAAATGTGTGGAGAAGCCAGG	natural antisense	NM_001082970	C11orf57	uncharacterized protein C11orf57 isoform b	+	111944967	111955874	6.24252	4.96044
ASHGA5P020194	0.0376427	0.0863875	2.43189	up	noncoding	NR_028383	TIMM8B	RefSeq	1155	chr11	-	111955538	111957522	CTCACAAATAGTGCATCACTTCATGGAGTTATGTTGGGATAAATGTGTGGAGAAGCCAGG	natural antisense	NM_018195	C11orf57	uncharacterized protein C11orf57 isoform a	+	111944967	111955874	6.24252	4.96044
ASHGA5P054522	0.0121016	0.0454821	2.42814	up	noncoding	ENST00000456375	CFL1P1	GENCODE	424	chr10	+	89577684	89579020	TATGATGTAATGAGAGTTCTCCCTGTGTTCCTCAGGAAGGCAGCTTGTGCCTTTCTACTT	natural antisense	NM_032810	ATAD1	ATPase family AAA domain-containing protein 1	-	89512874	89577917	5.2705	3.99065
ASHGA5P046379	0.000419748	0.0074576	2.42781	up	noncoding	NR_036533	LOC100499489	RefSeq	2516	chr10	-	22724353	22726858	CTTTCACCCTTACCACCTTGGAATTGTACCGCCTAATAAAATCTTCGCACTTAAACTTGG	intergenic							8.14834	6.86869
ASHGA5P032323	8.32988e-06	0.000839425	2.42292	up	noncoding	ENST00000429210	RP11-312O7.2	GENCODE	758	chr1	-	206135292	206137828	GAGGAGAGCTCTGAGTGGGAAGCGGAGCCGGGGGCCTGGGACCCGTCGCGTCAGAGCCAG	intronic antisense	ENST00000367129	FAM72A	family with sequence similarity 72, member A [Source:HGNC Symbol;Acc:24044]	+	206137264	206154207	4.1647	2.88795
ASHGA5P028399	2.88977e-06	0.000451637	2.42256	up	noncoding	TCONS_00010548	XLOC_005076	LincRNAs identified by Cabili et al	421	chr5	-	169005468	169010607	AGGCGCAGACGTGGCTCCACATAAATTTTTCCTTGGGCTGGTTTCCTGCATGTCTTTTAA	intergenic							4.38503	3.1085
ASHGA5P054521	0.0333789	0.0808902	2.41789	up	noncoding	NR_024397	LOC728190	RefSeq	825	chr10	-	88998423	89102315	GGGTTTTAATACAGACAAATCAACTCAATCAAAGAAACCAACTCAAAGAAAGATGGGTCT	intergenic							5.75209	4.47834
ASHGA5P034213	0.024108	0.0674066	2.41761	up	noncoding	TCONS_00016514	XLOC_007896	LincRNAs identified by Cabili et al	703	chr9	-	139506545	139507780	GCTTCTCGGGAATGGAATCACACACGGACTGTGGCGTACACATCACAACTTTAAACCCCG	intergenic							7.17459	5.901
ASHGA5P030754	0.0143176	0.0502613	2.41643	up	noncoding	ENST00000558221	CTD-3094K11.1	GENCODE	402	chr15	+	91382953	91384608	CTATCGTCCTTCTAAAAGACACTTCAAAAAGAGGCAAAATCATGCCTTCCATACATATAT	intergenic							5.90926	4.63639
ASHGA5P049540	9.81285e-05	0.0034536	2.41641	up	noncoding	uc010cps.1	BC150162	UCSC_knowngene	698	chr17	-	17929385	17930083	ACACCATCTGGTAATGGACATTTAGATGGGCATTCCCCTTGGATTGAGGCTATTTTTCCT	exon sense-overlapping	NM_145691	ATPAF2	ATP synthase mitochondrial F1 complex assembly factor 2	-	17921333	17942480	6.58353	5.31066
ASHGA5P050027	0.0101127	0.0409527	2.4157	up	noncoding	ENST00000583889	RP11-862L9.3	GENCODE	440	chr18	+	74688897	74690817	GCCCGGAACACAAAAGAAGACACCCATGCAAATACCATTAAAAGTTTATTGTTTTATTTC	natural antisense	NM_001025081	MBP	myelin basic protein isoform 1	-	74690788	74729055	4.95805	3.68561
ASHGA5P050027	0.0101127	0.0409527	2.4157	up	noncoding	ENST00000583889	RP11-862L9.3	GENCODE	440	chr18	+	74688897	74690817	GCCCGGAACACAAAAGAAGACACCCATGCAAATACCATTAAAAGTTTATTGTTTTATTTC	natural antisense	NM_001025090	MBP	myelin basic protein isoform 3	-	74690788	74729055	4.95805	3.68561
ASHGA5P050027	0.0101127	0.0409527	2.4157	up	noncoding	ENST00000583889	RP11-862L9.3	GENCODE	440	chr18	+	74688897	74690817	GCCCGGAACACAAAAGAAGACACCCATGCAAATACCATTAAAAGTTTATTGTTTTATTTC	natural antisense	NM_001025092	MBP	myelin basic protein isoform 4	-	74690788	74729055	4.95805	3.68561
ASHGA5P050027	0.0101127	0.0409527	2.4157	up	noncoding	ENST00000583889	RP11-862L9.3	GENCODE	440	chr18	+	74688897	74690817	GCCCGGAACACAAAAGAAGACACCCATGCAAATACCATTAAAAGTTTATTGTTTTATTTC	natural antisense	NM_001025101	MBP	Golli-MBP isoform 1	-	74690788	74844774	4.95805	3.68561
ASHGA5P050027	0.0101127	0.0409527	2.4157	up	noncoding	ENST00000583889	RP11-862L9.3	GENCODE	440	chr18	+	74688897	74690817	GCCCGGAACACAAAAGAAGACACCCATGCAAATACCATTAAAAGTTTATTGTTTTATTTC	natural antisense	NM_002385	MBP	myelin basic protein isoform 2	-	74690788	74729055	4.95805	3.68561
ASHGA5P042114	0.0226051	0.0647467	2.41349	up	noncoding	ENST00000433308	RP11-497D6.4	GENCODE	619	chr6	-	147171294	147172141	GTGGATATAGATCAATTCATGCTTTTCAATTCAGTCCTCTCTCTAATAAACTGCTGTCAT	intergenic							5.21705	3.94593
ASHGA5P022711	0.0275169	0.0729329	2.41343	up	noncoding	ENST00000561289	CTD-3110H11.2	GENCODE	554	chr15	+	50647741	50648611	GAAGGAACGAGGGCGTCTGGGCATGGCTTTCCCAACCTAGTAACTGCAACTTTTAGCATC	bidirectional	NM_002041	GABPB1	GA-binding protein subunit beta-1 isoform gamma 1	-	50578076	50647605	5.40907	4.13799
ASHGA5P022711	0.0275169	0.0729329	2.41343	up	noncoding	ENST00000561289	CTD-3110H11.2	GENCODE	554	chr15	+	50647741	50648611	GAAGGAACGAGGGCGTCTGGGCATGGCTTTCCCAACCTAGTAACTGCAACTTTTAGCATC	bidirectional	NM_005254	GABPB1	GA-binding protein subunit beta-1 isoform beta 1	-	50569388	50647605	5.40907	4.13799
ASHGA5P022711	0.0275169	0.0729329	2.41343	up	noncoding	ENST00000561289	CTD-3110H11.2	GENCODE	554	chr15	+	50647741	50648611	GAAGGAACGAGGGCGTCTGGGCATGGCTTTCCCAACCTAGTAACTGCAACTTTTAGCATC	bidirectional	NM_016654	GABPB1	GA-binding protein subunit beta-1 isoform beta 2	-	50569388	50647605	5.40907	4.13799
ASHGA5P022711	0.0275169	0.0729329	2.41343	up	noncoding	ENST00000561289	CTD-3110H11.2	GENCODE	554	chr15	+	50647741	50648611	GAAGGAACGAGGGCGTCTGGGCATGGCTTTCCCAACCTAGTAACTGCAACTTTTAGCATC	bidirectional	NM_016655	GABPB1	GA-binding protein subunit beta-1 isoform gamma 2	-	50578076	50647605	5.40907	4.13799
ASHGA5P022711	0.0275169	0.0729329	2.41343	up	noncoding	ENST00000561289	CTD-3110H11.2	GENCODE	554	chr15	+	50647741	50648611	GAAGGAACGAGGGCGTCTGGGCATGGCTTTCCCAACCTAGTAACTGCAACTTTTAGCATC	bidirectional	NM_181427	GABPB1	GA-binding protein subunit beta-1 isoform gamma 2	-	50578076	50647605	5.40907	4.13799
ASHGA5P030171	0.0276094	0.0730378	2.4114	up	noncoding	NR_026998	LOC91450	RefSeq	1016	chr15	-	78285574	78286567	CCAAGATGAAGTCATGCTGTGCTTTGGAATGGTAGATGCTCATTTATGTAAAATCATAAT	intron sense-overlapping	ENST00000465531	TBC1D2B	TBC1 domain family, member 2B [Source:HGNC Symbol;Acc:29183]	-	78276377	78294026	5.58102	4.31115
ASHGA5P015843	4.58272e-05	0.00223131	2.41097	up	noncoding	ENST00000424094	GNAS-AS1	GENCODE	1176	chr20	-	57393973	57425958	TCTTTGGAAACGAATTGTAAGTTATCCTGATGTTAGGGTCCCTGTCTGCTTCCAAGGGTC	intronic antisense	NM_016592	GNAS	protein ALEX NESP55	+	57414794	57486250	4.08104	2.81142
ASHGA5P032716	0.0418524	0.0922603	2.41007	up	noncoding	ENST00000582866	RP11-498C9.15	GENCODE	2682	chr17	-	79836300	79838982	GCCTAAGGTAGGCCAGAGTTAATTTTTGTGTTATCTATACACGTTATTGAAGCGAATTAT	intergenic							5.14013	3.87106
ASHGA5P019378	0.0321707	0.0793594	2.4093	up	noncoding	NR_073059	C7orf55	RefSeq	989	chr7	+	139025195	139031065	GTGGGATAGGGTCACCAGTGAAAAGTTGTGCAGAGCCCAACATGAGCTTCATTTCCAAGC	exon sense-overlapping	NM_001244584	C7orf55-LUC7L2	C7orf55-LUC7L2 protein	+	139025877	139108203	5.20006	3.93145
ASHGA5P019378	0.0321707	0.0793594	2.4093	up	noncoding	NR_073059	C7orf55	RefSeq	989	chr7	+	139025195	139031065	GTGGGATAGGGTCACCAGTGAAAAGTTGTGCAGAGCCCAACATGAGCTTCATTTCCAAGC	exon sense-overlapping	NM_001244585	LUC7L2	putative RNA-binding protein Luc7-like 2 isoform 3	+	139025104	139108203	5.20006	3.93145
ASHGA5P019378	0.0321707	0.0793594	2.4093	up	noncoding	NR_073059	C7orf55	RefSeq	989	chr7	+	139025195	139031065	GTGGGATAGGGTCACCAGTGAAAAGTTGTGCAGAGCCCAACATGAGCTTCATTTCCAAGC	exon sense-overlapping	NM_197964	C7orf55	UPF0562 protein C7orf55	+	139025877	139031065	5.20006	3.93145
ASHGA5P041671	0.0233632	0.0661137	2.40895	up	noncoding	ENST00000566170	RP1-223E5.4	GENCODE	1045	chr6	-	13614342	13615387	CAAATGTCTGTGTAGTTTCTGCACTTCATAACAGCTTATATGACAGTTGCTCCAGCCATT	natural antisense	NM_001193267	SIRT5	NAD-dependent protein deacylase sirtuin-5, mitochondrial isoform 3	+	13574760	13615390	4.58324	3.31484
ASHGA5P041671	0.0233632	0.0661137	2.40895	up	noncoding	ENST00000566170	RP1-223E5.4	GENCODE	1045	chr6	-	13614342	13615387	CAAATGTCTGTGTAGTTTCTGCACTTCATAACAGCTTATATGACAGTTGCTCCAGCCATT	natural antisense	NM_001242827	SIRT5	NAD-dependent protein deacylase sirtuin-5, mitochondrial isoform 4	+	13574760	13615390	4.58324	3.31484
ASHGA5P041671	0.0233632	0.0661137	2.40895	up	noncoding	ENST00000566170	RP1-223E5.4	GENCODE	1045	chr6	-	13614342	13615387	CAAATGTCTGTGTAGTTTCTGCACTTCATAACAGCTTATATGACAGTTGCTCCAGCCATT	natural antisense	NM_012241	SIRT5	NAD-dependent protein deacylase sirtuin-5, mitochondrial isoform 1	+	13574858	13615390	4.58324	3.31484
ASHGA5P029745	0.000790755	0.0104793	2.40771	up	noncoding	ENST00000435624	C14orf63	GENCODE	448	chr14	+	97409915	97411731	GAAACTCCATGTTACCAGCATGTTATCAGCATGGCTCCGAATCCTATATCCACCCTCCAG	intergenic							4.8606	3.59294
ASHGA5P025926	0.000490015	0.00813311	2.40676	up	noncoding	NR_046402	POLD1	RefSeq	3361	chr19	+	50887579	50921275	TGGCCGAGAGGACCCGCTGTTCGTGCTGGAGCACAGCCTGCCCATTGACACGCAGTACTA	exon sense-overlapping	NM_001256849	POLD1	DNA polymerase delta catalytic subunit	+	50887579	50921275	4.44138	3.17429
ASHGA5P025926	0.000490015	0.00813311	2.40676	up	noncoding	NR_046402	POLD1	RefSeq	3361	chr19	+	50887579	50921275	TGGCCGAGAGGACCCGCTGTTCGTGCTGGAGCACAGCCTGCCCATTGACACGCAGTACTA	exon sense-overlapping	NM_002691	POLD1	DNA polymerase delta catalytic subunit	+	50887579	50921275	4.44138	3.17429
ASHGA5P028401	1.87571e-05	0.00134077	2.40169	up	noncoding	ENST00000535242	RP13-977J11.8	GENCODE	391	chr12	+	132674757	132675542	ACAGCTCTGCACCTCGGAGGACTCGGGGAAGTTTCTGGGCCTATTTGGGCAATAGGAGAA	intergenic							4.35149	3.08744
ASHGA5P033422	0.000345348	0.00667508	2.40116	up	noncoding	ENST00000576021	RP11-498C9.3	GENCODE	479	chr17	+	79825596	79826149	TGAGGTGACTTGAGTTTTGGCAATTTGGCTTTCCCCAAGCCGCCGGAGCCATCTCCACAG	natural antisense	NM_001185077	ARHGDIA	rho GDP-dissociation inhibitor 1 isoform a	-	79825596	79828790	5.21029	3.94656
ASHGA5P033422	0.000345348	0.00667508	2.40116	up	noncoding	ENST00000576021	RP11-498C9.3	GENCODE	479	chr17	+	79825596	79826149	TGAGGTGACTTGAGTTTTGGCAATTTGGCTTTCCCCAAGCCGCCGGAGCCATCTCCACAG	natural antisense	NM_001185078	ARHGDIA	rho GDP-dissociation inhibitor 1 isoform b	-	79825596	79829282	5.21029	3.94656
ASHGA5P033422	0.000345348	0.00667508	2.40116	up	noncoding	ENST00000576021	RP11-498C9.3	GENCODE	479	chr17	+	79825596	79826149	TGAGGTGACTTGAGTTTTGGCAATTTGGCTTTCCCCAAGCCGCCGGAGCCATCTCCACAG	natural antisense	NM_004309	ARHGDIA	rho GDP-dissociation inhibitor 1 isoform a	-	79825596	79829282	5.21029	3.94656
ASHGA5P044044	0.000177099	0.00473342	2.40034	up	noncoding	ENST00000449903	AC006372.5	GENCODE	546	chr7	+	157294015	157296271	TCCACATGAAAATATTTAGAGATCCAGCTCTTGGAAGCCAAGGAGAAACTGGCTTTTAAG	intergenic							4.83401	3.57077
ASHGA5P027349	0.0128297	0.0471681	2.39871	up	noncoding	NR_033981	FLJ27354	RefSeq	789	chr1	-	90090407	90098453	AACTCTACCCCTTGAGATATCCTGAGAAATAGGAATCTATGGTTCCTATTGTTTGGAAAG	bidirectional	NM_032270	LRRC8C	leucine-rich repeat-containing protein 8C	+	90098643	90185094	8.86768	7.60542
ASHGA5P058495	1.53353e-06	0.000321379	2.3966	up	noncoding	uc004azt.1	DQ673970	UCSC_knowngene	867	chr9	-	102121666	102132150	ATGAATCTTCATCAAACAATAAAATCCTGCCTGGGTCCAGCCACTTTGTCACAAGCTACA	intergenic							4.72575	3.46476
ASHGA5P016188	0.000667029	0.00970138	2.3954	up	noncoding	ENST00000548271	AL589743.1	GENCODE	412	chr14	+	19653907	19683250	ATCCCTGCAGCTGTGTTTGAACAGGAAAGAAAAAAGAAGAAAACAAACCTCCATACGAGA	intergenic							4.31187	3.0516
ASHGA5P037898	0.00389226	0.023708	2.39526	up	noncoding	ENST00000428818	TTC28-AS1	GENCODE	706	chr22	+	28315444	28320951	CATCTGTGGATTGTTCTGTCACTTATTTTCTTTAATAAATGGGTTTCTGAACCTCTGTTG	intronic antisense	ENST00000415296	PITPNB	phosphatidylinositol transfer protein, beta [Source:HGNC Symbol;Acc:9002]	-	28256183	28316122	8.24044	6.98027
ASHGA5P048426	5.14437e-05	0.00236758	2.39512	up	noncoding	ENST00000561746	RP11-819C21.1	GENCODE	4140	chr11	-	107182857	107186997	TAGTACTGGGCATCACATGCTGCTTCCCTTTGTGGCTTTGAATAAACCCTTATTTTCTTG	intergenic							7.10126	5.84116
ASHGA5P046816	0.00111679	0.0122347	2.39383	up	noncoding	ENST00000437014	RP11-20J15.2	GENCODE	841	chr10	-	44755049	44757261	TAAGGAGACCAAGACATTGTGAAAACCAAGTGTCTCCCACCTTGCCAGGACCTATAAAGT	intergenic							4.16681	2.90749
ASHGA5P030552	0.0370325	0.0856905	2.39025	up	noncoding	ENST00000560518	RP11-430B1.2	GENCODE	1972	chr15	+	52472413	52498071	CCCAAGTTTTTTCCTTCAGGATAAATCATCCTTATATAAAGAAAACTACCAACAGCGTAC	intronic antisense	NM_016194	GNB5	guanine nucleotide-binding protein subunit beta-5 isoform b	-	52413122	52483565	5.02484	3.76768
ASHGA5P030552	0.0370325	0.0856905	2.39025	up	noncoding	ENST00000560518	RP11-430B1.2	GENCODE	1972	chr15	+	52472413	52498071	CCCAAGTTTTTTCCTTCAGGATAAATCATCCTTATATAAAGAAAACTACCAACAGCGTAC	natural antisense	NM_018728	MYO5C	unconventional myosin-Vc	-	52484514	52587995	5.02484	3.76768
ASHGA5P030137	0.0331705	0.0806182	2.38957	up	noncoding	ENST00000568345	RP11-1007O24.2	GENCODE	1135	chr15	-	72757468	72758603	ACCTCAAAATATGTTGAATCTTGCCAACATTAAATCAACACTGGTGTTCTTGCCTGTTAA	intergenic							5.14857	3.89182
ASHGA5P030671	2.39221e-05	0.00153185	2.38901	up	noncoding	ENST00000567704	RP11-114H24.1	pseudogene	4801	chr15	+	78187025	78197016	ACATCATATTCTCAGTGAAGAGCCCGCCGAGTGCCAGCTACCTGGTGATGGTGTCACGTG								4.93826	3.68185
ASHGA5P051211	0.000192403	0.00491455	2.38858	up	noncoding	ENST00000414022	TMEM191A	GENCODE	466	chr22	+	21057260	21058542	GGCTGTTCGGCGGTCCTCGCGCGCTGGCCATCAGGTGAGCAGGGCGGTGGGCGCGGCCGC	intergenic							4.63391	3.37775
ASHGA5P047551	0.0291489	0.0753724	2.38473	up	noncoding	ENST00000428940	RP11-77P6.2	GENCODE	643	chr10	+	88281701	88282443	GTAAAATACGCCTATGAAAACTGGGGGAGAGGAATAAAACAAGCTGGCAGAACGTTTTTC	bidirectional	NM_015045	WAPAL	wings apart-like protein homolog	-	88195012	88281541	5.20878	3.95495
ASHGA5P031047	0.0373806	0.0861071	2.38387	up	noncoding	ENST00000567108	CTD-3203P2.1	GENCODE	1684	chr16	-	27224630	27226314	AGACAACGTTTGTTATTATTACTGCTACTATTACTATTTGCTCCTCATGAGATCAAGGTG	natural antisense	NM_001145348	KDM8	lysine-specific demethylase 8 isoform 1	+	27215295	27233089	4.91261	3.65931
ASHGA5P031047	0.0373806	0.0861071	2.38387	up	noncoding	ENST00000567108	CTD-3203P2.1	GENCODE	1684	chr16	-	27224630	27226314	AGACAACGTTTGTTATTATTACTGCTACTATTACTATTTGCTCCTCATGAGATCAAGGTG	natural antisense	NM_024773	KDM8	lysine-specific demethylase 8 isoform 2	+	27214806	27233089	4.91261	3.65931
ASHGA5P038695	0.0372402	0.0859999	2.38245	up	noncoding	uc003bwe.1	AX748267	UCSC_knowngene	2429	chr3	+	11577722	11580151	ATGGTATGGTAGAGAGGAAAGAGACTCATATTTGAATATGACACAGAATAGGCCCTTAGT	intron sense-overlapping	NM_001136031	ATG7	ubiquitin-like modifier-activating enzyme ATG7 isoform b	+	11314009	11599139	5.47606	4.22361
ASHGA5P038695	0.0372402	0.0859999	2.38245	up	noncoding	uc003bwe.1	AX748267	UCSC_knowngene	2429	chr3	+	11577722	11580151	ATGGTATGGTAGAGAGGAAAGAGACTCATATTTGAATATGACACAGAATAGGCCCTTAGT	intron sense-overlapping	NM_001144912	ATG7	ubiquitin-like modifier-activating enzyme ATG7 isoform c	+	11314009	11599139	5.47606	4.22361
ASHGA5P038695	0.0372402	0.0859999	2.38245	up	noncoding	uc003bwe.1	AX748267	UCSC_knowngene	2429	chr3	+	11577722	11580151	ATGGTATGGTAGAGAGGAAAGAGACTCATATTTGAATATGACACAGAATAGGCCCTTAGT	intron sense-overlapping	NM_006395	ATG7	ubiquitin-like modifier-activating enzyme ATG7 isoform a	+	11314009	11599139	5.47606	4.22361
ASHGA5P032602	0.0343584	0.0821496	2.38233	up	noncoding	ENST00000582986	PLEKHM1P	GENCODE	5014	chr17	-	62778836	62833272	TTCCAGTCCAAACCCCAAGAGCTCATCACATAATAAAAGTGTCATAATAGCTGATATAGG	intergenic							5.3091	4.05672
ASHGA5P043271	0.0410639	0.0910654	2.38111	up	noncoding	AF143879		LincRNAs identified by Khalil et al	581	chr16	+	25271823	25272384	TTTTCCTTAAAATCCCTGGATCTAGAGGCACAACTGAGAAAGGTGGTCTTTGAATGCTAG	intergenic							5.21488	3.96324
ASHGA5P035104	2.87171e-05	0.00167595	2.37849	up	noncoding	ENST00000441238	TGFA-IT1	GENCODE	436	chr2	-	70694516	70695627	AGTTATGCAAACTACAGCAGACCCTTCCTGTCTCAATTCAGCATCCAGCGTCTACTGTTA	intron sense-overlapping	NM_001099691	TGFA	protransforming growth factor alpha isoform 2 preproprotein	-	70674411	70781147	4.62046	3.37041
ASHGA5P035104	2.87171e-05	0.00167595	2.37849	up	noncoding	ENST00000441238	TGFA-IT1	GENCODE	436	chr2	-	70694516	70695627	AGTTATGCAAACTACAGCAGACCCTTCCTGTCTCAATTCAGCATCCAGCGTCTACTGTTA	intron sense-overlapping	NM_003236	TGFA	protransforming growth factor alpha isoform 1 preproprotein	-	70674411	70781147	4.62046	3.37041
ASHGA5P033022	0.0197529	0.0603118	2.37755	up	noncoding	ENST00000578883	RP11-848P1.9	GENCODE	477	chr17	+	29351358	29361180	CTCTGCTTAGATTGGCTTAGTTTTCTCTTTAGTCAAATCTTCAGGAACCAATTTATTACC	intergenic							6.10804	4.85856
ASHGA5P057915	3.50882e-06	0.000512278	2.3773	up	noncoding	TCONS_00023722	XLOC_011518	LincRNAs identified by Cabili et al	343	chr15	-	69752816	69754460	TCATCTGGTTCCCGCCTCAAACCTGTACCTGTGCGGAGGAGCCTGGAAGAAGAACTAAAA	intergenic							5.3102	4.06088
ASHGA5P008592	0.000830136	0.0107065	2.37516	up	noncoding	ENST00000344693	ANKRD20A11P	GENCODE	1088	chr21	-	15316089	15352758	AGCAGCACAGCAGTGTGTCCCCAAGAAAGTGTCAGAGCCTTTACGTGGACCTTCCCATGG	intergenic							5.61503	4.367
ASHGA5P039890	2.31177e-05	0.00151039	2.37481	up	noncoding	TCONS_00022840	XLOC_011106	LincRNAs identified by Cabili et al	1050	chr14	-	94449441	94453395	ATGGCCACTTTGGACCACGAGAAATATCAATATCAAACGCCCTTTCTTTTCATGCCCTCA	intergenic							4.25436	3.00655
ASHGA5P025785	0.0303613	0.0769684	2.37354	up	noncoding	NR_037637	GJA9-MYCBP	RefSeq	2540	chr1	-	39328161	39347298	ACTAAGAAAGCATCACTTAGGAGCTGCTACTCCAGAAAATCCAGAAATAGAGCTGCTTCG	exon sense-overlapping	NM_012333	MYCBP	C-Myc-binding protein	-	39328161	39339050	5.72105	4.47401
ASHGA5P025785	0.0303613	0.0769684	2.37354	up	noncoding	NR_037637	GJA9-MYCBP	RefSeq	2540	chr1	-	39328161	39347298	ACTAAGAAAGCATCACTTAGGAGCTGCTACTCCAGAAAATCCAGAAATAGAGCTGCTTCG	exon sense-overlapping	NM_030772	GJA9	gap junction alpha-9 protein precursor	-	39339738	39347298	5.72105	4.47401
ASHGA5P047662	0.000744193	0.0100988	2.37301	up	noncoding	NR_038938	LOC100505761	RefSeq	1337	chr10	+	104209573	104216050	TATTTACTTTTCTTACTAAGCTGGGGATCACCGTCGCCCTCGGCTTGGCAGGAAGGCGGG	natural antisense	NM_024886	C10orf95	uncharacterized protein C10orf95	-	104209593	104211300	4.7927	3.54598
ASHGA5P039268	0.0201233	0.0610013	2.37205	up	noncoding	ENST00000420226	TM4SF19-AS1	GENCODE	322	chr3	+	196045200	196050544	ATCCATGGATCACCTGGAAGTTTACAATGTGATTTAAAATGCATTCTATCATTCCACCGA	natural antisense	NM_001204897	TM4SF19	transmembrane 4 L6 family member 19 isoform 2	-	196050416	196065291	4.68453	3.4384
ASHGA5P039268	0.0201233	0.0610013	2.37205	up	noncoding	ENST00000420226	TM4SF19-AS1	GENCODE	322	chr3	+	196045200	196050544	ATCCATGGATCACCTGGAAGTTTACAATGTGATTTAAAATGCATTCTATCATTCCACCGA	natural antisense	NM_001204898	TM4SF19	transmembrane 4 L6 family member 19 isoform 3	-	196050416	196065291	4.68453	3.4384
ASHGA5P039268	0.0201233	0.0610013	2.37205	up	noncoding	ENST00000420226	TM4SF19-AS1	GENCODE	322	chr3	+	196045200	196050544	ATCCATGGATCACCTGGAAGTTTACAATGTGATTTAAAATGCATTCTATCATTCCACCGA	natural antisense	NM_138461	TM4SF19	transmembrane 4 L6 family member 19 isoform 1	-	196050416	196065291	4.68453	3.4384
ASHGA5P021387	0.0421884	0.092684	2.37199	up	noncoding	NR_024598	C11orf73	RefSeq	949	chr11	+	86013252	86056985	GGGGAGGCTGGAGAAGGAAGCCAACATCCTTTTGGAGCCATGAATATTGTCCGAACTCCA	exon sense-overlapping	NM_016401	C11orf73	protein Hikeshi	+	86013252	86056985	6.11151	4.86541
ASHGA5P056978	0.00372753	0.0230991	2.37151	up	noncoding	TCONS_00011737	XLOC_005203	LincRNAs identified by Cabili et al	988	chr6	+	23416371	23455725	CAAAAAGGCCAGAAGGTCTCGCCCCACAGCAAATTAGAAGTTAATTTGCATGAGAGCAAG	intergenic							5.0334	3.78759
ASHGA5P049021	0.0373576	0.0861062	2.36756	up	noncoding	ENST00000577055	CTD-2270P14.3	GENCODE	1778	chr16	-	2787076	2800811	TCTGAACTGCTTAAAACTCTTCCAGACACCCTCAGGTTGACATCACAACTCCTTTGTTGG	intergenic							6.01285	4.76945
ASHGA5P039308	0.00652755	0.0315299	2.3611	up	noncoding	ENST00000564063	RP11-483I13.5	GENCODE	1566	chr1	+	108742547	108744113	AGGAACTCAGACCCTGAACTTACCTCTCCTCATATCATTTTGTATGTTTAAGATATGTAT	natural antisense	NM_013386	SLC25A24	calcium-binding mitochondrial carrier protein SCaMC-1 isoform 1	-	108677343	108742980	8.75715	7.51769
ASHGA5P045019	0.0295937	0.0760121	2.35882	up	noncoding	ENST00000517915	RP11-89K10.1	GENCODE	317	chr8	+	127601458	127647029	GAAAAGTCTTGGGGATCCTGAATTCATTAAACAGCTTCTTCTTTTGCCCTGGTTCCTCAT	intergenic							4.92678	3.68871
ASHGA5P048646	0.00947184	0.0391834	2.35839	up	noncoding	ENST00000568525	RP11-532F12.5	GENCODE	470	chr15	-	41130536	41136498	GAGAAGCTGGGTGAAGCCATCTTGCATCTTTAGCCCCAGTCAAGTTACCTCAGCAAAGAC	natural antisense	NM_003710	SPINT1	kunitz-type protease inhibitor 1 isoform 2 precursor	+	41136245	41149853	5.09657	3.85877
ASHGA5P048646	0.00947184	0.0391834	2.35839	up	noncoding	ENST00000568525	RP11-532F12.5	GENCODE	470	chr15	-	41130536	41136498	GAGAAGCTGGGTGAAGCCATCTTGCATCTTTAGCCCCAGTCAAGTTACCTCAGCAAAGAC	natural antisense	NM_181642	SPINT1	kunitz-type protease inhibitor 1 isoform 1 precursor	+	41136245	41149853	5.09657	3.85877
ASHGA5P050627	0.0422196	0.092693	2.3579	up	noncoding	uc002tjp.2	DKFZp686E10196	UCSC_knowngene	1901	chr2	+	113993106	113998402	GATTTCTCAACTCATTCATTTGTTCATTCATTCACTATACCATTACTGTCTATTATAAGG	intronic antisense	NM_013952	PAX8	paired box protein Pax-8 isoform PAX8C	-	113973573	114036498	7.50315	6.26565
ASHGA5P050627	0.0422196	0.092693	2.3579	up	noncoding	uc002tjp.2	DKFZp686E10196	UCSC_knowngene	1901	chr2	+	113993106	113998402	GATTTCTCAACTCATTCATTTGTTCATTCATTCACTATACCATTACTGTCTATTATAAGG	intronic antisense	NM_013953	PAX8	paired box protein Pax-8 isoform PAX8D	-	113973573	114036498	7.50315	6.26565
ASHGA5P050627	0.0422196	0.092693	2.3579	up	noncoding	uc002tjp.2	DKFZp686E10196	UCSC_knowngene	1901	chr2	+	113993106	113998402	GATTTCTCAACTCATTCATTTGTTCATTCATTCACTATACCATTACTGTCTATTATAAGG	intronic antisense	NM_013992	PAX8	paired box protein Pax-8 isoform PAX8E	-	113973573	114036498	7.50315	6.26565
ASHGA5P050627	0.0422196	0.092693	2.3579	up	noncoding	uc002tjp.2	DKFZp686E10196	UCSC_knowngene	1901	chr2	+	113993106	113998402	GATTTCTCAACTCATTCATTTGTTCATTCATTCACTATACCATTACTGTCTATTATAAGG	natural antisense	NM_003466	PAX8	paired box protein Pax-8 isoform PAX8A	-	113973573	114036498	7.50315	6.26565
ASHGA5P051831	0.000993011	0.0115948	2.35756	up	noncoding	uc021xja.1	FLJ34208	UCSC_knowngene	1304	chr3	+	194207868	194209455	TCTAACCCTTCACCTTGCTCAGGCAAGAGCAACTCATGACTTTCATTTTGCCAAACCTTG	intronic antisense	ENST00000439040	ATP13A3	ATPase type 13A3 [Source:HGNC Symbol;Acc:24113]	-	194123400	194219093	4.98764	3.75034
ASHGA5P047238	0.0233003	0.0659864	2.35619	up	noncoding	ENST00000561822	RP11-5N23.3	GENCODE	697	chr10	+	6628185	6628882	AAACAAAACCACACCTGGATTGCCTGGTACTTAAATAAAATGCACTATGATGATTGAAGA	intergenic							6.30466	5.0682
ASHGA5P008103	0.0364039	0.0849804	2.35514	up	noncoding	NR_036471	ENY2	RefSeq	2946	chr8	+	110346551	110358189	CACTGTAAAGGTAATTAAAGAAAAAGGACTAGAACACGTTACTGTTGATGACTTGGTGGC	exon sense-overlapping	NM_001193557	ENY2	enhancer of yellow 2 transcription factor homolog isoform 2	+	110346551	110358189	6.62105	5.38523
ASHGA5P008103	0.0364039	0.0849804	2.35514	up	noncoding	NR_036471	ENY2	RefSeq	2946	chr8	+	110346551	110358189	CACTGTAAAGGTAATTAAAGAAAAAGGACTAGAACACGTTACTGTTGATGACTTGGTGGC	exon sense-overlapping	NM_020189	ENY2	enhancer of yellow 2 transcription factor homolog isoform 1	+	110346551	110358189	6.62105	5.38523
ASHGA5P015716	0.00163695	0.0149597	2.35463	up	noncoding	ENST00000422894	RP5-894D12.3	GENCODE	318	chr6	+	170584461	170588557	CGGAACCTTGGTACCTCACTCCGGATTCTATTAAAATCGTAATCTCTAGAAGATGGATTC	intergenic							5.98667	4.75117
ASHGA5P043646	0.0231338	0.0657573	2.35444	up	noncoding	uc010kyk.2	BC008049	UCSC_knowngene	1942	chr7	+	44808453	44810735	TTTCTTGTGAATGTGCCAAGTATTACATAAAAACCAAAAGGCTGACCAGACTTAACAGTG	exon sense-overlapping	NM_031449	ZMIZ2	zinc finger MIZ domain-containing protein 2 isoform 1	+	44788529	44809479	6.08193	4.84655
ASHGA5P043646	0.0231338	0.0657573	2.35444	up	noncoding	uc010kyk.2	BC008049	UCSC_knowngene	1942	chr7	+	44808453	44810735	TTTCTTGTGAATGTGCCAAGTATTACATAAAAACCAAAAGGCTGACCAGACTTAACAGTG	exon sense-overlapping	NM_174929	ZMIZ2	zinc finger MIZ domain-containing protein 2 isoform 2	+	44795786	44809479	6.08193	4.84655
ASHGA5P020355	0.0111519	0.0433523	2.35412	up	noncoding	ENST00000512155	CTD-2297D10.2	GENCODE	889	chr5	-	5132892	5140167	CCTCCGGCCGGCCAGCCTGGGCTTGTTTTCCCGGTAGTACTGGGTTCTGAGAGAGAGTAA	bidirectional	NM_139056	ADAMTS16	A disintegrin and metalloproteinase with thrombospondin motifs 16 preproprotein	+	5140442	5320412	4.92808	3.69289
ASHGA5P043961	3.01601e-05	0.00170611	2.34794	up	noncoding	uc022anq.1	TRBV	UCSC_knowngene	90	chr7	+	142334824	142334914	CTCTGACAGTGACCAGTGCCCATCCTGAAGACAGCAGCTTCTACATCTGCAGTGCTAGAG	intergenic							5.03723	3.80583
ASHGA5P029319	3.52178e-06	0.000512278	2.34614	up	noncoding	AI124845		LincRNAs identified by Khalil et al	402	chr10	-	32036583	32036986	TAGTATGGGCTCCCTGCCATTTCATTTAGAACTTTGTAATTGAGGCATAATAAACATGTA	intergenic							4.9048	3.67451
ASHGA5P025990	0.0158593	0.0535869	2.34461	up	noncoding	NR_048557	TSN	RefSeq	3217	chr2	+	122513120	122525428	CATCCGAGAGATTTCATGAGCACTGGAGGTTTGTGTTGCAGCGCTTGGTCTTCTTGGCAG	exon sense-overlapping	NM_001261401	TSN	translin isoform 2	+	122513120	122525428	4.7092	3.47986
ASHGA5P025990	0.0158593	0.0535869	2.34461	up	noncoding	NR_048557	TSN	RefSeq	3217	chr2	+	122513120	122525428	CATCCGAGAGATTTCATGAGCACTGGAGGTTTGTGTTGCAGCGCTTGGTCTTCTTGGCAG	exon sense-overlapping	NM_004622	TSN	translin isoform 1	+	122513120	122525428	4.7092	3.47986
ASHGA5P017782	0.016428	0.0548057	2.34095	up	noncoding	ENST00000445681	GS1-124K5.4	GENCODE	540	chr7	+	65958692	65960461	TCACCTGAGCCTGTGTAGGATGCCGAAGGACCTGTTCAAAGTATTTTCTGTAACTCCAAC	intergenic							5.79595	4.56885
ASHGA5P034338	0.0493551	0.101972	2.34085	up	noncoding	ENST00000416022	LENG8-AS1	GENCODE	582	chr19	-	54956213	54959780	GTACATAGGCATTTCTCTGAACTGCGCGCCACCTTTTGAGTGCCATCTGTTTCCGTCCAG	bidirectional	NM_052925	LENG8	leukocyte receptor cluster member 8	+	54960064	54973196	5.67827	4.45123
ASHGA5P041270	0.0396051	0.0890248	2.33941	up	noncoding	NR_036530	LOC100289230	RefSeq	1876	chr5	+	98264837	98266713	CTGTCGTATTGTGCCATCAAACATGCTATTCGAAAAAAGATCTTGCCCAATTTGTAATAA	intergenic							4.98151	3.75536
ASHGA5P036723	0.0388539	0.0882043	2.33888	up	noncoding	ENST00000454331	RP4-610C12.3	GENCODE	553	chr20	-	29521636	29522987	TATTTATAACTCCCTCTATAACTCTCTGTTTGGAGACACTGTGGCTCTATTGACAGACTG	intergenic							5.6424	4.41659
ASHGA5P019269	0.000632074	0.00943085	2.33857	up	noncoding	NR_045028	C17orf76-AS1	RefSeq	1202	chr17	+	16342300	16345340	AACCCGAGAGAACTGGATTGCGTACCCACTGCAGAGTGCTGAAGACGGGGTAGCCACGAG	natural antisense	NM_001113567	FAM211A	leucine-rich repeat-containing protein FAM211A isoform 1	-	16345318	16395505	5.10482	3.8792
ASHGA5P019269	0.000632074	0.00943085	2.33857	up	noncoding	NR_045028	C17orf76-AS1	RefSeq	1202	chr17	+	16342300	16345340	AACCCGAGAGAACTGGATTGCGTACCCACTGCAGAGTGCTGAAGACGGGGTAGCCACGAG	natural antisense	NM_207387	FAM211A	leucine-rich repeat-containing protein FAM211A isoform 2	-	16345318	16395505	5.10482	3.8792
ASHGA5P054637	0.0128276	0.0471681	2.33838	up	noncoding	TCONS_00012071	XLOC_005595	LincRNAs identified by Cabili et al	957	chr6	-	6700752	6739519	TGGACGGCTCCTCTTTGTTTTTGAAGGGATTCCATCTCTATTTTGCCATGTGCTCCTTCA	intergenic							4.80997	3.58446
ASHGA5P037679	0.0308639	0.0776314	2.33249	up	noncoding	NR_033531	IFT27	RefSeq	782	chr22	-	37168446	37172177	GCTACTTGTTCTGGTTCTGGAGAAGAAAGAAAACAACATTTGACATTGATCTGTATTTTG	exon sense-overlapping	NM_001177701	IFT27	intraflagellar transport protein 27 homolog isoform 1	-	37154245	37172177	4.75291	3.53104
ASHGA5P037679	0.0308639	0.0776314	2.33249	up	noncoding	NR_033531	IFT27	RefSeq	782	chr22	-	37168446	37172177	GCTACTTGTTCTGGTTCTGGAGAAGAAAGAAAACAACATTTGACATTGATCTGTATTTTG	exon sense-overlapping	NM_006860	IFT27	intraflagellar transport protein 27 homolog isoform 2	-	37154245	37172177	4.75291	3.53104
ASHGA5P031458	0.0166429	0.0551991	2.33123	up	noncoding	ENST00000567515	AC005606.15	GENCODE	504	chr16	+	2047654	2048375	AAGCATGAAACAGCCAACTGTTTACACAACACATCTGTGACATCTGACTCTGGCACCAGT	natural antisense	NM_178167	ZNF598	zinc finger protein 598	-	2047767	2059763	4.51035	3.28926
ASHGA5P042519	0.033763	0.0814357	2.33113	up	noncoding	ENST00000443221	RP11-250B2.3	GENCODE	758	chr6	+	81153172	81172924	TTCGAATTATCTGTTATGAATTGTGGTTTTGTTATTAAATAGACATTTTGTTTAATTCTT	intergenic							4.58722	3.36619
ASHGA5P055772	0.0146434	0.051127	2.32855	up	noncoding	ENST00000520310	TPT1-AS1	GENCODE	563	chr13	+	45915672	45952755	GAGGAATTAAACTTTGGCCCTGCGCCTCGTCCAGCCTAGGTTCCACCCTTTTCTGGGAAC	bidirectional	NM_003295	TPT1	translationally-controlled tumor protein	-	45911303	45915297	7.88002	6.66059
ASHGA5P025897	0.00925539	0.0385474	2.32607	up	noncoding	NR_046073	DNAJC19	RefSeq	1262	chr3	-	180701497	180707562	CGGAGCCATGCCCTACTGCCAATAAAGGGAAAATAAGAGATGCTCATCGACGAATTATGC	exon sense-overlapping	NM_001190233	DNAJC19	mitochondrial import inner membrane translocase subunit TIM14 isoform 2	-	180701497	180707306	7.50789	6.28999
ASHGA5P025897	0.00925539	0.0385474	2.32607	up	noncoding	NR_046073	DNAJC19	RefSeq	1262	chr3	-	180701497	180707562	CGGAGCCATGCCCTACTGCCAATAAAGGGAAAATAAGAGATGCTCATCGACGAATTATGC	exon sense-overlapping	NM_145261	DNAJC19	mitochondrial import inner membrane translocase subunit TIM14 isoform 1	-	180701497	180707562	7.50789	6.28999
ASHGA5P052680	0.000165268	0.00453554	2.32588	up	noncoding	ENST00000448198	XXbac-BPG254F23.7	GENCODE	381	chr6	+	32685781	32686604	GTAGCCCTCACCGGGCTCTGAACTAGGGGAGTGTGGATTCTCAAAGAATTCATGAAAATG	intergenic							3.74014	2.52236
ASHGA5P046719	0.0389154	0.0882807	2.32382	up	noncoding	ENST00000569906	RP11-66N11.8	GENCODE	755	chrX	+	152864826	152869808	ACAAAATTCCAAGAGGGCCTTTTCGAATAGACGCATGAACGGTGTTTGTGTCTGGATCGT	bidirectional	NM_001130997	FAM58A	cyclin-related protein FAM58A isoform 2	-	152853382	152864632	5.83406	4.61756
ASHGA5P046719	0.0389154	0.0882807	2.32382	up	noncoding	ENST00000569906	RP11-66N11.8	GENCODE	755	chrX	+	152864826	152869808	ACAAAATTCCAAGAGGGCCTTTTCGAATAGACGCATGAACGGTGTTTGTGTCTGGATCGT	bidirectional	NM_152274	FAM58A	cyclin-related protein FAM58A isoform 1	-	152853382	152864632	5.83406	4.61756
ASHGA5P050548	0.000254954	0.00563772	2.32351	up	noncoding	ENST00000413975	RP11-475O6.1	GENCODE	382	chr1	-	84297303	84326653	TAAGTTCCACAGCTTCACCCTTGTCGGTGTGATATGGGCGTGAAAGAAGACATAAAACAG	intergenic							4.02527	2.80896
ASHGA5P057732	0.0388501	0.0882043	2.32309	up	noncoding	TCONS_00021289	XLOC_010016	LincRNAs identified by Cabili et al	214	chr12	-	10433067	10443823	TTTAATCAAGGTCCTGGAAATGGCTAGAATCTGTCCTGAACTCTTGGCATCTTCTGATAC	intronic antisense	ENST00000544747	KLRD1	killer cell lectin-like receptor subfamily D, member 1 [Source:HGNC Symbol;Acc:6378]	+	10378656	10467418	9.20847	7.99243
ASHGA5P000566	1.56542e-05	0.00120289	2.32113	up	noncoding	chrX:30716225-30736150+	chrX:30716225-30736150	LincRNAs identified by Khalil et al	19925	chrX	+	30806304	30826229	AGCTCACCCTGGCGTTTTTGGTAGGAAGAGAGCACTTCTAGAATGATTATGACTTGGAAC	intergenic							5.01189	3.79706
ASHGA5P043114	0.0322492	0.0794469	2.31707	up	noncoding	TCONS_00014675	XLOC_006774	LincRNAs identified by Cabili et al	264	chr8	+	37439299	37440484	TTAAAGCACTGATGAAACGCAGAGAATTGTGGCTGGTTGTTAGAATATACTGCGGAGACG	intergenic							4.62945	3.41715
ASHGA5P042006	0.0216373	0.0631584	2.31669	up	noncoding	uc003pyw.1	BC022047	UCSC_knowngene	2435	chr6	-	122757933	122760368	GGGGGAAATTTTTAATTACTGAAACTATTTAGGAGCTGTGGGATTACATGTCTATCTTCA	intergenic							7.96553	6.75346
ASHGA5P032887	0.00195548	0.0163583	2.31503	up	noncoding	ENST00000580770	C17orf76-AS1	GENCODE	572	chr17	+	16342350	16381992	TTTCTATTCGCCTCGCCCTGCTGGACCTTTTCTGGAGAGATGGGAATTCTTGGAACAGGT	intronic antisense	NM_001113567	FAM211A	leucine-rich repeat-containing protein FAM211A isoform 1	-	16345318	16395505	6.00257	4.79154
ASHGA5P032887	0.00195548	0.0163583	2.31503	up	noncoding	ENST00000580770	C17orf76-AS1	GENCODE	572	chr17	+	16342350	16381992	TTTCTATTCGCCTCGCCCTGCTGGACCTTTTCTGGAGAGATGGGAATTCTTGGAACAGGT	intronic antisense	NM_207387	FAM211A	leucine-rich repeat-containing protein FAM211A isoform 2	-	16345318	16395505	6.00257	4.79154
ASHGA5P040421	0.0312671	0.0782611	2.3141	up	noncoding	uc003jnb.1	AK056817	UCSC_knowngene	2757	chr5	-	42985502	42993435	ATGGAACTGCCATTGCTCAGTAGGAAAATGTCCTTTCTACAAGCATTCATATTTCAATAA	intergenic							5.33689	4.12644
ASHGA5P027681	0.0147372	0.0512994	2.31045	up	noncoding	ENST00000545508	RP11-173C20.2	GENCODE	402	chr12	-	127236709	127245591	TCAACCTCACCTCATTTATCTTTCAGGGCATGTTATTATTATTGGTCTGTGAAAGAATCC	intergenic							5.34038	4.13221
ASHGA5P034175	0.000195967	0.00494879	2.30825	up	noncoding	TCONS_00016510	XLOC_007895	LincRNAs identified by Cabili et al	991	chr9	-	139150740	139159464	AGCCCCGCGAGGCCCGGAAGCACCGAACCCAGAGCTTTAGGGGCCTTGGGCCGCTTCAAG	intergenic							4.38737	3.18057
ASHGA5P000227	0.00809454	0.0356266	2.30739	up	noncoding	chr12:53675775-53689275-	chr12:53675775-53689275	LincRNAs identified by Khalil et al	13500	chr12	-	55389508	55403008	TCACTCAACTTAATTCCTGCTATCCCCTCAAGGAAAGCCTTTGAAGTCACCGAAGTCAGT	intergenic							6.0035	4.79723
ASHGA5P028713	0.0288662	0.0749504	2.30719	up	noncoding	ENST00000431928	AL592284.1	GENCODE	1063	chr1	-	144479977	144481765	TGTTTGTGAAAATGGCATAAAGCCGGTTTCTTGTGCTGGTTATGCAATTTTCAGAATGTG	intronic antisense	ENST00000538264	AL592284.2	Uncharacterized protein [Source:UniProtKB/TrEMBL;Acc:F5H305]	+	144339737	144521058	4.67209	3.46595
ASHGA5P037037	5.8428e-05	0.00256419	2.30534	up	noncoding	TCONS_00025483	XLOC_012304	LincRNAs identified by Cabili et al	230	chr17	+	72376324	72377340	CAGTTAGACCCAAGAGAGCCTCATGCTTGTCCTAGACCTCATTTTCCCGACCCAGTGGCA	intergenic							4.2322	3.02722
ASHGA5P026048	0.0305294	0.07719	2.30193	up	noncoding	NR_033839	FLJ39051	RefSeq	753	chr11	-	126211611	126225482	TGTGGCCAAGAAATGTATTCTCTCACTTTGGACTTAGGAGTCCAAAGAGAAGCCCAGAAA	intronic antisense	NM_014026	DCPS	m7GpppX diphosphatase	+	126173646	126215644	4.74786	3.54501
ASHGA5P045231	0.0282494	0.0740231	2.29833	up	noncoding	uc004aby.3	BC019880	UCSC_knowngene	549	chr9	-	41948513	41954688	AGGACACTGTGGGCCATAAATGTGTTCTTTGGCCTGAAGAAATAAAACTTGGTGGTCCAA	intergenic							5.61502	4.41443
ASHGA5P042930	0.023799	0.0668205	2.2976	up	noncoding	ENST00000442252	AC002480.5	GENCODE	1282	chr7	-	22611225	22701411	GAGGAATGGGGTGAGGGTATCTATTGCATCTATTTTATGGTAATAAAAGGAAGTTGAAAG	intron sense-overlapping	ENST00000439708	STEAP1B	STEAP family member 1B [Source:HGNC Symbol;Acc:41907]	-	22532295	22672544	6.23517	5.03504
ASHGA5P050221	0.0301877	0.0767688	2.29644	up	noncoding	NR_038332	LOC100505622	RefSeq	701	chr19	+	42636780	42641251	TAAAAATACCTTGGTAATTTATCACTTAATAAATATCCAATAAATGCTATTATGTGCCAA	intronic antisense	ENST00000524801	POU2F2	POU class 2 homeobox 2 [Source:HGNC Symbol;Acc:9213]	-	42620942	42680177	5.34542	4.14603
ASHGA5P050221	0.0301877	0.0767688	2.29644	up	noncoding	NR_038332	LOC100505622	RefSeq	701	chr19	+	42636780	42641251	TAAAAATACCTTGGTAATTTATCACTTAATAAATATCCAATAAATGCTATTATGTGCCAA	intronic antisense	ENST00000532176	POU2F2	POU class 2 homeobox 2 [Source:HGNC Symbol;Acc:9213]	-	42621142	42700737	5.34542	4.14603
ASHGA5P039199	6.58876e-05	0.00270635	2.29539	up	noncoding	ENST00000414686	RP11-421L21.2	GENCODE	671	chr1	+	101461028	101461816	GGCCTCCCTATAATCAATGGTGTTAGTCAACTTTCAGATTTCCTTTAAATTACGTTTCTA	intronic antisense	NM_001077394	DPH5	diphthine synthase isoform a	-	101455179	101491362	6.1004	4.90166
ASHGA5P039199	6.58876e-05	0.00270635	2.29539	up	noncoding	ENST00000414686	RP11-421L21.2	GENCODE	671	chr1	+	101461028	101461816	GGCCTCCCTATAATCAATGGTGTTAGTCAACTTTCAGATTTCCTTTAAATTACGTTTCTA	intronic antisense	NM_001077395	DPH5	diphthine synthase isoform b	-	101455179	101491362	6.1004	4.90166
ASHGA5P039199	6.58876e-05	0.00270635	2.29539	up	noncoding	ENST00000414686	RP11-421L21.2	GENCODE	671	chr1	+	101461028	101461816	GGCCTCCCTATAATCAATGGTGTTAGTCAACTTTCAGATTTCCTTTAAATTACGTTTCTA	intronic antisense	NM_015958	DPH5	diphthine synthase isoform a	-	101455179	101491362	6.1004	4.90166
ASHGA5P048291	0.0272493	0.0725782	2.29032	up	noncoding	ENST00000527566	RP11-167J8.2	GENCODE	422	chr11	-	71383720	71421627	GGAAGCCCAATTCTGGCCTCTCTTTGGGGTGGGCTGAGAGTGGGAACTAGACTCTCTTTC	intergenic							5.99118	4.79562
ASHGA5P015056	0.0141414	0.0498464	2.28957	up	noncoding	ENST00000416099	RP11-552M11.4	GENCODE	723	chr1	-	111981261	111983850	AAGAAGCAGGACTTGCTGTTCTCTGGTCCACCAAGGGCTATGAGGCTCACCCCTTGGATG	exon sense-overlapping	NM_024102	WDR77	methylosome protein 50	-	111982511	111991830	6.60266	5.40758
ASHGA5P044350	1.51271e-06	0.000321379	2.28871	up	noncoding	ENST00000524269	RP11-115I9.1	GENCODE	339	chr8	-	77488785	77491580	GCAAAGAATTTCCCCTTGTGTGATCATGAAGAGAATATTAAGTATTCTTCAGCTCAAAAG	intergenic							5.42851	4.23397
ASHGA5P032846	0.0164526	0.054807	2.2887	up	noncoding	ENST00000433058	RP11-496N12.6	GENCODE	656	chr1	-	225635692	225652985	ATCCCGAAGATATGTGTTTGGCCAATAAAACACTGAATAAAAATCCATCATGTTTCCAGA	intergenic							5.10427	3.90974
ASHGA5P015065	0.0320456	0.0791994	2.2887	up	noncoding	uc001vdx.3	DLEU2	UCSC_knowngene	1406	chr13	-	50618047	50656139	ATCCAGGAAGTAGCAAGAAATGTGGATAATTACTGTACCTTCCTCATGGAAAAAGTTTTA	bidirectional	ENST00000378180	DLEU1	deleted in lymphocytic leukemia 1 (non-protein coding) [Source:HGNC Symbol;Acc:13747]	+	50656306	50679433	4.77555	3.58103
ASHGA5P014583	0.000838436	0.0107677	2.28643	up	noncoding	ENST00000411579	CTD-3184A7.4	GENCODE	582	chr20	+	62258602	62260060	TCAGGCCTCCAGGTGTCATCGAACACCCTTGTGCTTGCTGTCACCCGCTGCCTGTCTGCA	bidirectional	NM_012384	GMEB2	glucocorticoid modulatory element-binding protein 2	-	62218954	62258381	6.41688	5.22378
ASHGA5P037941	0.0012071	0.0128086	2.28538	up	noncoding	uc003akv.1	AK074476	UCSC_knowngene	3330	chr22	+	31831222	31834552	GCCCCAGTAAACATGATTTGTTTGAGAGAAACTACCATATGTAATAGATGATTCCTCAAT	intergenic							6.11966	4.92723
ASHGA5P041923	0.0192402	0.0595749	2.28531	up	noncoding	ENST00000373604	RP4-622L5.7	GENCODE	642	chr1	-	32670369	32671786	GTAGTAAAACATCCCCTACAACCACTTTTCTTCTAATTTTGGGGAAATTCTAAATTCCTG	natural antisense	NM_001160042	IQCC	IQ domain-containing protein C isoform 1	+	32671235	32674288	4.61974	3.42735
ASHGA5P041923	0.0192402	0.0595749	2.28531	up	noncoding	ENST00000373604	RP4-622L5.7	GENCODE	642	chr1	-	32670369	32671786	GTAGTAAAACATCCCCTACAACCACTTTTCTTCTAATTTTGGGGAAATTCTAAATTCCTG	natural antisense	NM_018134	IQCC	IQ domain-containing protein C isoform 2	+	32671235	32674288	4.61974	3.42735
ASHGA5P041923	0.0192402	0.0595749	2.28531	up	noncoding	ENST00000373604	RP4-622L5.7	GENCODE	642	chr1	-	32670369	32671786	GTAGTAAAACATCCCCTACAACCACTTTTCTTCTAATTTTGGGGAAATTCTAAATTCCTG	natural antisense	NM_024296	CCDC28B	coiled-coil domain-containing protein 28B	+	32666201	32670991	4.61974	3.42735
ASHGA5P007375	0.0375004	0.0862248	2.28444	up	noncoding	NR_024206	LINC00152	RefSeq	518	chr2	+	87754973	87821030	CCTCTCCTTGAATAACTGGGAGATGAAACAGGAAGCTCTATGACACACTTGATCGAATAT	intergenic							6.04209	4.85025
ASHGA5P051669	1.25272e-05	0.00111596	2.28121	up	noncoding	NR_033268	NUDT16	RefSeq	6204	chr3	+	131100624	131107674	CCTCCCGCAGATGCAGATGCGCTTCGATGGACGCCTGGGCTTCCCCGGCGGATTCGTGGA	exon sense-overlapping	NM_001171905	NUDT16	U8 snoRNA-decapping enzyme isoform 3	+	131100514	131107674	4.1355	2.9457
ASHGA5P051669	1.25272e-05	0.00111596	2.28121	up	noncoding	NR_033268	NUDT16	RefSeq	6204	chr3	+	131100624	131107674	CCTCCCGCAGATGCAGATGCGCTTCGATGGACGCCTGGGCTTCCCCGGCGGATTCGTGGA	exon sense-overlapping	NM_001171906	NUDT16	U8 snoRNA-decapping enzyme isoform 1	+	131100608	131101641	4.1355	2.9457
ASHGA5P051669	1.25272e-05	0.00111596	2.28121	up	noncoding	NR_033268	NUDT16	RefSeq	6204	chr3	+	131100624	131107674	CCTCCCGCAGATGCAGATGCGCTTCGATGGACGCCTGGGCTTCCCCGGCGGATTCGTGGA	exon sense-overlapping	NM_152395	NUDT16	U8 snoRNA-decapping enzyme isoform 2	+	131100608	131107674	4.1355	2.9457
ASHGA5P038749	0.0338	0.0815035	2.28085	up	noncoding	ENST00000468437	SPATA1	GENCODE	383	chr1	+	84972064	84972684	GGGATCTTCTCGAGGTTTGACTTTACTGGCTTCTTAGCTCTTGAATCGGTTTTTCTGAAG	intronic antisense	NM_005274	GNG5	guanine nucleotide-binding protein G(I)/G(S)/G(O) subunit gamma-5 precursor	-	84964005	84972262	4.59153	3.40195
ASHGA5P033012	0.0183262	0.0581107	2.27707	up	noncoding	ENST00000440026	LRRC37BP1	GENCODE	1961	chr17	+	28934675	28962484	TGTGGGAGTCCTGTGAATCTCTCCAAAGCCAACTCAGTTCATCTTTCTGCTTGAAACCTT	intergenic							5.32383	4.13665
ASHGA5P021302	0.0073528	0.033631	2.27679	up	noncoding	NR_045637	BOLA3-AS1	RefSeq	659	chr2	+	74375107	74376181	GATGGTCCAGCACGCGGTCTGGTGGCACCCTGCAGGATTTACCAGCTTTTTGCCAACATT	natural antisense	ENST00000327428	BOLA3	bolA homolog 3 (E. coli) [Source:HGNC Symbol;Acc:24415]	-	74362524	74375121	5.53015	4.34315
ASHGA5P050875	0.0243526	0.0679358	2.27394	up	noncoding	NR_028050	MTERFD2	RefSeq	2766	chr2	-	242026508	242041747	GATTTGTAATAAATTTATTGTGGTACAGTAATATGCATAAAATAAACCCATTTTAATGTG	exon sense-overlapping	NM_182501	MTERFD2	mTERF domain-containing protein 2	-	242034980	242041747	5.90657	4.72137
ASHGA5P050875	0.0243526	0.0679358	2.27394	up	noncoding	NR_028050	MTERFD2	RefSeq	2766	chr2	-	242026508	242041747	GATTTGTAATAAATTTATTGTGGTACAGTAATATGCATAAAATAAACCCATTTTAATGTG	natural antisense	NM_001080437	SNED1	sushi, nidogen and EGF-like domain-containing protein 1 precursor	+	241938254	242033643	5.90657	4.72137
ASHGA5P018819	0.000265695	0.00579191	2.27296	up	noncoding	ENST00000457975	RP11-168O22.1	GENCODE	446	chr10	-	57007507	57356993	CAACTAAATAGAAAGATGGAAAAAGCCCACTTCACCCTACTATTGTCACTAATTTCAACT	intron sense-overlapping	ENST00000373957	PCDH15	protocadherin-related 15 [Source:HGNC Symbol;Acc:14674]	-	55580938	57387702	4.91673	3.73216
ASHGA5P018819	0.000265695	0.00579191	2.27296	up	noncoding	ENST00000457975	RP11-168O22.1	GENCODE	446	chr10	-	57007507	57356993	CAACTAAATAGAAAGATGGAAAAAGCCCACTTCACCCTACTATTGTCACTAATTTCAACT	intron sense-overlapping	ENST00000458638	PCDH15	protocadherin-related 15 [Source:HGNC Symbol;Acc:14674]	-	56138582	57079374	4.91673	3.73216
ASHGA5P030151	0.00995565	0.0405071	2.27217	up	noncoding	ENST00000565737	CTD-3154N5.1	GENCODE	498	chr15	-	74905534	74907937	TTTTGTGACTTTCACACCTTTCAGAAACTTGGAGAAAGATCTGCCCCCAGGTGAGGTTTG	intronic antisense	NM_003992	CLK3	dual specificity protein kinase CLK3 isoform b	+	74900712	74922542	5.90708	4.72301
ASHGA5P030151	0.00995565	0.0405071	2.27217	up	noncoding	ENST00000565737	CTD-3154N5.1	GENCODE	498	chr15	-	74905534	74907937	TTTTGTGACTTTCACACCTTTCAGAAACTTGGAGAAAGATCTGCCCCCAGGTGAGGTTTG	natural antisense	NM_001130028	CLK3	dual specificity protein kinase CLK3 isoform a	+	74907334	74922542	5.90708	4.72301
ASHGA5P023406	0.00903905	0.0379572	2.27093	up	noncoding	ENST00000580270	RP11-1096G20.5	GENCODE	463	chr17	-	11857205	11880911	CTTTATCTCAGTGCCTACTCAGCTGTGAATCCTCTGAAGTTCATTTTTTCATATCAATAT	exon sense-overlapping	NM_144680	ZNF18	zinc finger protein 18	-	11880761	11900689	6.65961	5.47633
ASHGA5P023406	0.00903905	0.0379572	2.27093	up	noncoding	ENST00000580270	RP11-1096G20.5	GENCODE	463	chr17	-	11857205	11880911	CTTTATCTCAGTGCCTACTCAGCTGTGAATCCTCTGAAGTTCATTTTTTCATATCAATAT	intronic antisense	NM_001372	DNAH9	dynein heavy chain 9, axonemal isoform 2	+	11501747	11873065	6.65961	5.47633
ASHGA5P023406	0.00903905	0.0379572	2.27093	up	noncoding	ENST00000580270	RP11-1096G20.5	GENCODE	463	chr17	-	11857205	11880911	CTTTATCTCAGTGCCTACTCAGCTGTGAATCCTCTGAAGTTCATTTTTTCATATCAATAT	intronic antisense	NM_004662	DNAH9	dynein heavy chain 9, axonemal isoform 1	+	11786218	11873065	6.65961	5.47633
ASHGA5P031696	0.0184646	0.0583297	2.26844	up	noncoding	ENST00000562354	KIAA0664L3	GENCODE	1907	chr16	+	31718283	31721097	AGAACTTCCTTGTGAATCCTTCCAGAAATACTCCATGTGATCTTTATCCCCCTCTTTTTT	intergenic							8.56788	7.38618
ASHGA5P045044	0.0313094	0.0783458	2.26768	up	noncoding	ENST00000561761	RP11-629O1.2	GENCODE	1546	chr8	+	134584413	134586104	TTAGCTTTGGCTGGGAATATCGTCTGGGCCAATAAAGAGTTTTTGGATGAAATAACAAAA	bidirectional	NM_003033	ST3GAL1	CMP-N-acetylneuraminate-beta-galactosamide- alpha-2,3-sialyltransferase 1	-	134467090	134584183	6.90121	5.72
ASHGA5P045044	0.0313094	0.0783458	2.26768	up	noncoding	ENST00000561761	RP11-629O1.2	GENCODE	1546	chr8	+	134584413	134586104	TTAGCTTTGGCTGGGAATATCGTCTGGGCCAATAAAGAGTTTTTGGATGAAATAACAAAA	bidirectional	NM_173344	ST3GAL1	CMP-N-acetylneuraminate-beta-galactosamide- alpha-2,3-sialyltransferase 1	-	134467090	134584183	6.90121	5.72
ASHGA5P034642	8.08253e-06	0.000839425	2.26389	up	noncoding	W87727		LincRNAs identified by Khalil et al	280	chr12	-	96556590	96556861	AGAACCAAATTCCTTACTAGTCCTACCACCTGAGCTTCAAGGATTGTGGATATCCAGTGG	intergenic							4.27173	3.09293
ASHGA5P033979	4.04211e-05	0.00202567	2.26327	up	noncoding	ENST00000469289	MIR1302-10	GENCODE	535	chr1	+	30266	31109	CGTTGGCTTGCCTCCGGCATTTTTGGCCCTTGCCTTTTAGGGTTGCCAGATTAAAAGACA	intergenic							4.32078	3.14237
ASHGA5P026643	3.06284e-05	0.00170611	2.26182	up	noncoding	ENST00000529304	CTD-2562J17.9	GENCODE	216	chr11	+	74975332	74976214	AGAAACTGAGGAGAGAGCCCTTGTCCTGCTAATCAATATATTTGCCTGGGTAAACCTCAG	natural antisense	NM_004041	ARRB1	beta-arrestin-1 isoform A	-	74971165	75062875	5.33729	4.15981
ASHGA5P026643	3.06284e-05	0.00170611	2.26182	up	noncoding	ENST00000529304	CTD-2562J17.9	GENCODE	216	chr11	+	74975332	74976214	AGAAACTGAGGAGAGAGCCCTTGTCCTGCTAATCAATATATTTGCCTGGGTAAACCTCAG	natural antisense	NM_020251	ARRB1	beta-arrestin-1 isoform B	-	74971165	75062875	5.33729	4.15981
ASHGA5P052338	0.000419181	0.0074576	2.26052	up	noncoding	ENST00000503091	AC008592.5	GENCODE	665	chr5	+	95197489	95210223	AAGCCCAGGCATTGTCCCATAGCTGGCCCTGTGTGTTTGCACTGATTCCTCAGAATAAGT	intergenic							4.89682	3.72016
ASHGA5P019165	0.0357942	0.0839843	2.25556	up	noncoding	ENST00000470997	HLA-DPB2	pseudogene	776	chr6	+	33080292	33096861	TGTGGAGTGGACATCTTCACGCACAGAAGGAGGAAGAAAGTTCAACAAGGATCTGCATAA								7.00194	5.82845
ASHGA5P022856	8.37513e-06	0.000839425	2.25556	up	noncoding	ENST00000564140	CTD-2008A1.2	GENCODE	594	chr15	-	45119148	45122635	GGAACAATGGATCTGTGTGTGATTGATCTACCCATGGCCACTCGCTCTGGTGGGACCCTC	intergenic							3.78659	2.6131
ASHGA5P058613	0.0071709	0.0332838	2.25471	up	noncoding	uc011are.2	FLJ46257	UCSC_knowngene	3677	chr22	-	48020216	48027318	GGTGGAGGAGGTCCAGTTGCTCTTCAGAACTCAAAATCCCATCTCTGCAGGTCTCAGCCA	intergenic							7.64709	6.47415
ASHGA5P033862	0.0112556	0.0436143	2.25405	up	noncoding	TCONS_00016498	XLOC_007879	LincRNAs identified by Cabili et al	567	chr9	-	135903517	135905802	CCTTGCCTGCAATTGTAAATCAATAAATTGGTGTATTTACATCAGATCCCTGTGAGTTTG	intergenic							5.7417	4.56918
ASHGA5P043134	0.00124747	0.0130566	2.25316	up	noncoding	uc003ubp.3	AK095583	UCSC_knowngene	5002	chr7	-	74440308	74445630	GAACACTTTGTCAGGACTAGAAAATATCCCTTCTCCTCTGACCACAGAAACAGCACAACT	exon sense-overlapping	ENST00000503250	WBSCR16	Williams-Beuren syndrome chromosome region 16 [Source:HGNC Symbol;Acc:14948]	-	74441225	74489643	6.51314	5.34119
ASHGA5P027224	0.0350934	0.0829943	2.25052	up	noncoding	ENST00000550426	RP11-493L12.2	GENCODE	683	chr12	-	47599680	47609983	AGGAGGCAGGAGGTGGAGCAAAACACACCAAGCCTGGTGCCAATCATTGACAATATTATG	intronic antisense	ENST00000546455	PCED1B	PC-esterase domain containing 1B [Source:HGNC Symbol;Acc:28255]	+	47473385	47630443	7.16989	5.99963
ASHGA5P032726	0.0396062	0.0890248	2.24776	up	noncoding	ENST00000579188	RP13-20L14.4	GENCODE	680	chr17	-	80358578	80359258	GTGGGGAGCTATTTTGCTATGACTTCTGGCCAGTGTACTTTATTTTAAATTTAGTTTTGA	intron sense-overlapping	NM_024648	C17orf101	PKHD domain-containing transmembrane protein C17orf101 isoform 1	-	80347085	80376513	5.19719	4.02871
ASHGA5P032726	0.0396062	0.0890248	2.24776	up	noncoding	ENST00000579188	RP13-20L14.4	GENCODE	680	chr17	-	80358578	80359258	GTGGGGAGCTATTTTGCTATGACTTCTGGCCAGTGTACTTTATTTTAAATTTAGTTTTGA	intron sense-overlapping	NM_175902	C17orf101	PKHD domain-containing transmembrane protein C17orf101 isoform 2	-	80347085	80376513	5.19719	4.02871
ASHGA5P018429	0.0312651	0.0782611	2.24756	up	noncoding	NR_037176	LOC100507463	RefSeq	1272	chr6	+	32811862	32814277	TACAGTAAGAGGAAGTCTGCATTATCACGAGGAGCTTGGAAAGGAGGTAACACACTCAAG	intronic antisense	NM_004159	PSMB8	proteasome subunit beta type-8 isoform E1 proprotein	-	32808493	32812712	4.73134	3.56298
ASHGA5P018429	0.0312651	0.0782611	2.24756	up	noncoding	NR_037176	LOC100507463	RefSeq	1272	chr6	+	32811862	32814277	TACAGTAAGAGGAAGTCTGCATTATCACGAGGAGCTTGGAAAGGAGGTAACACACTCAAG	natural antisense	NM_000593	TAP1	antigen peptide transporter 1	-	32812985	32821748	4.73134	3.56298
ASHGA5P032970	0.031367	0.0784296	2.24495	up	noncoding	ENST00000578929	RP11-173M1.8	GENCODE	1284	chr17	+	25641668	25642952	AATTCTTTTCCATCAGAAGTAAGAGCTGTTGGCAGCAACTAATAAAATGCAACCTAGTGA	intergenic							5.98284	4.81616
ASHGA5P058651	0.000789129	0.0104793	2.24334	up	noncoding	uc022alq.1	LOC646329	UCSC_knowngene	390	chr7	-	130557250	130596911	GGAAAATATCTGTTAACAGACTGCTTTTACACCTACGCTTGCACCCTCACGACATGCTCT	intergenic							6.88339	5.71774
ASHGA5P038693	0.00807561	0.0355952	2.24314	up	noncoding	ENST00000538717	GHRLOS2	GENCODE	1327	chr3	+	10326102	10327429	ATTAGGTTTTCTAAACATGCACATTGGCCTTGCTACTTGTCCTTTTATTCCCTTCCCACA	natural antisense	ENST00000335542	GHRL	ghrelin/obestatin prepropeptide [Source:HGNC Symbol;Acc:18129]	-	10327358	10334631	7.45782	6.2923
ASHGA5P000058	1.14873e-06	0.000271601	2.24182	up	noncoding	AK123125		RNAdb	1854	chr4	+	570956	578655	ATTTCAGTTTCCAGGGAAACGAGATGCTCGCTTCACCCCACTGAGATGTAACTCAGTTTT	intergenic							4.43755	3.27289
ASHGA5P034863	0.0201811	0.061033	2.24129	up	noncoding	NR_033997	RNF144A-AS1	RefSeq	2348	chr2	-	7052406	7058813	GCATGGAAGGTGACTACTCATGACTGCAACTTAGAGAACAAGGGTTATAATAAAAATAAA	intronic antisense	NM_014746	RNF144A	probable E3 ubiquitin-protein ligase RNF144A	+	7057522	7184309	4.38879	3.22445
ASHGA5P054161	0.0317348	0.0788113	2.24085	up	noncoding	ENST00000444489	RP13-507I23.1	GENCODE	2951	chrX	+	149108373	149185018	AATTCCAGAGGTAGAGCACTGCTGATTGGAGACATATTAAGTAAAATGTACTGTGGAAAT	intergenic							5.68513	4.52109
ASHGA5P037456	0.0106307	0.0421799	2.23885	up	noncoding	NR_038883	LINC00649	RefSeq	2567	chr21	+	35303515	35343487	TCTGTCACCTCTTTCTAAAAGCTGGGAAATGGTTATTGTCAACGCCAGCCCCATTTTGGA	intergenic							6.01174	4.84898
ASHGA5P035180	0.0365658	0.0850557	2.23866	up	noncoding	ENST00000448595	AC109826.2	GENCODE	548	chr2	-	99385423	99388543	GAAGGCTGAAAAACAGCTGTTAAAATGGCTTGTTTGTTTGAAGATGAATGAGAGTACACA	intergenic							5.27443	4.11179
ASHGA5P020434	0.000690887	0.00986171	2.23609	up	noncoding	ENST00000513466	FAM86HP	pseudogene	959	chr3	-	129818100	129830315	CTATTTGCTGCACAGCCATCATCTCCCACGGTACCACAGGCCTGGTCACATGGGACGCTG								4.35299	3.19201
ASHGA5P046393	9.16092e-06	0.000886618	2.23578	up	noncoding	uc009xkk.1	BC141952	UCSC_knowngene	571	chr10	-	24736418	24736989	AGATGAATGAAATGGAGACCCTGTCCCTGAGAAGCTTAGAGCTGAAAGACACTTAAGACG	intronic antisense	NM_001098500	KIAA1217	sickle tail protein homolog isoform 2	+	23983674	24836772	4.87049	3.70972
ASHGA5P046393	9.16092e-06	0.000886618	2.23578	up	noncoding	uc009xkk.1	BC141952	UCSC_knowngene	571	chr10	-	24736418	24736989	AGATGAATGAAATGGAGACCCTGTCCCTGAGAAGCTTAGAGCTGAAAGACACTTAAGACG	intronic antisense	NM_001098501	KIAA1217	sickle tail protein homolog isoform 3	+	24497719	24836772	4.87049	3.70972
ASHGA5P046393	9.16092e-06	0.000886618	2.23578	up	noncoding	uc009xkk.1	BC141952	UCSC_knowngene	571	chr10	-	24736418	24736989	AGATGAATGAAATGGAGACCCTGTCCCTGAGAAGCTTAGAGCTGAAAGACACTTAAGACG	intronic antisense	NM_019590	KIAA1217	sickle tail protein homolog isoform 1	+	24497719	24836772	4.87049	3.70972
ASHGA5P015622	2.50259e-05	0.00154684	2.23482	up	noncoding	ENST00000422023	RP11-242F11.2	GENCODE	446	chr6	-	148338557	148342110	AGTTTTCAAGTTTAATTCAAGTGCATCTACCTCTTCTCCACTGTTGACACCAGAAAACTC	intergenic							3.88295	2.72279
ASHGA5P014968	0.00586962	0.0298051	2.23351	up	noncoding	ENST00000415222	PCBP1-AS1	GENCODE	502	chr2	-	70191504	70314475	AGATGGTGGCTTTCTTTGGACCCTTGACATCAACCAGTTACTATTTGCCAGAGACAGACT	bidirectional	NM_006196	PCBP1	poly(rC)-binding protein 1	+	70314584	70316334	5.68471	4.5254
ASHGA5P033907	0.00235375	0.017867	2.23319	up	noncoding	ENST00000581996	RP11-17M16.2	GENCODE	813	chr18	+	74203607	74205487	GAACTCGCCGTTTTGATTTTATTATTTAAGCATGCGCCAGCAATCGTGTTTCCTTAAGAA	intronic antisense	NM_014643	ZNF516	zinc finger protein 516	-	74069636	74207146	4.74613	3.58702
ASHGA5P033070	0.020835	0.0620943	2.23308	up	noncoding	NR_038847	LOC100505576	RefSeq	3708	chr17	+	37081420	37085637	ATTGGGTACAATGTAAGGAGAGAGGATTACCCATCTCTTCAGTTACTTGTAAAATATGAT	intergenic							7.0209	5.86187
ASHGA5P034594	0.0108294	0.0426745	2.23233	up	noncoding	uc002oet.3	BC024306	UCSC_knowngene	1291	chr19	+	37266689	37267980	ATGAGATCCGTGCTTTTATCTTGTCTCAGACTCCCAATGATAGGCACATACTCTCCTCTG	intergenic							5.36009	4.20153
ASHGA5P044635	0.0222106	0.0640013	2.23179	up	noncoding	ENST00000533615	FAM66E	GENCODE	2087	chr8	+	7812595	7848219	AGGAAAGAAGATCCAGTGAGATAGTCCACAAATGGAATGTAAATCCATAAACACTCTTAA	intronic antisense	NM_001256871	USP17L3	ubiquitin carboxyl-terminal hydrolase 17-like protein 3	-	7833914	7835507	4.50905	3.35085
ASHGA5P044635	0.0222106	0.0640013	2.23179	up	noncoding	ENST00000533615	FAM66E	GENCODE	2087	chr8	+	7812595	7848219	AGGAAAGAAGATCCAGTGAGATAGTCCACAAATGGAATGTAAATCCATAAACACTCTTAA	intronic antisense	NM_001256872	USP17L8	inactive ubiquitin carboxyl-terminal hydrolase 17-like protein 8	-	7829182	7830775	4.50905	3.35085
ASHGA5P033530	0.034941	0.0828068	2.23094	up	noncoding	ENST00000564351	RP11-666N19.1	GENCODE	1562	chr18	-	18526866	18528428	GACACTTGTATGTTAATCCTATAAATTGGTTTCTTGTACCATGTAGGATGGTTTGGCTAT	intergenic							4.89337	3.73572
ASHGA5P057819	5.93532e-05	0.00256419	2.22808	up	noncoding	TCONS_00022189	XLOC_010411	LincRNAs identified by Cabili et al	259	chr13	+	64201007	64209643	CTTTAATCTGAGAATCTTACGTCTTCAAGCCCTGTTCACACCGCTTGTCCCATTAGAATA	intergenic							4.59486	3.43906
ASHGA5P034876	0.0022272	0.0174009	2.22656	up	noncoding	ENST00000569008	RP11-434B12.1	GENCODE	1553	chr2	-	8861263	8862816	CTTGCCCTTTCATATGTCTCTTGTCACTATTCTGTGTAAGATTATAATCCCAAATACCAC	intergenic							7.61346	6.45864
ASHGA5P051777	2.4406e-05	0.00153982	2.22625	up	noncoding	ENST00000436078	RP11-91K9.1	GENCODE	2957	chr3	+	177534652	177617012	GAGGCACATCCCAAGAAGCCCATCTTTCTTTCACTCAACTCAGAATATTGAGGGTATTAG	intergenic							4.07386	2.91925
ASHGA5P054706	0.0143471	0.0503315	2.22557	up	noncoding	TCONS_00006375	XLOC_002995	LincRNAs identified by Cabili et al	543	chr3	+	195362628	195363268	CTCGGGCCAGGTGACCTTTATGGCGGCGCCTTCTGTCCCTGGTCGCTTTTCCACTGAATG	intron sense-overlapping	ENST00000381954	MUC20	mucin 20, cell surface associated [Source:HGNC Symbol;Acc:23282]	+	195343315	195460421	6.69022	5.53604
ASHGA5P047920	0.0284852	0.0743931	2.22421	up	noncoding	NR_036539	LOC644656	RefSeq	1161	chr11	-	9481102	9482245	CCTAGACGCCAATGGAAAGAAAATGGGACTTTAAGCTTTGTTTGAACATATATTCTGTTA	natural antisense	ENST00000396604	ZNF143	zinc finger protein 143 [Source:HGNC Symbol;Acc:12928]	+	9482068	9549601	5.83186	4.67857
ASHGA5P047920	0.0284852	0.0743931	2.22421	up	noncoding	NR_036539	LOC644656	RefSeq	1161	chr11	-	9481102	9482245	CCTAGACGCCAATGGAAAGAAAATGGGACTTTAAGCTTTGTTTGAACATATATTCTGTTA	natural antisense	ENST00000531943	ZNF143	zinc finger protein 143 [Source:HGNC Symbol;Acc:12928]	+	9481865	9499971	5.83186	4.67857
ASHGA5P019803	0.000336611	0.00657967	2.22305	up	noncoding	NR_046056	CACNA1G	RefSeq	7882	chr17	+	48638428	48704832	CTGGACACGGTGATGCAGGCCCTGCCCCAGCTCTGGGCGTGGAGCTCTTTGGAGACCTGG	exon sense-overlapping	NM_001256324	CACNA1G	voltage-dependent T-type calcium channel subunit alpha-1G isoform 16	+	48638428	48704832	4.92542	3.77287
ASHGA5P019803	0.000336611	0.00657967	2.22305	up	noncoding	NR_046056	CACNA1G	RefSeq	7882	chr17	+	48638428	48704832	CTGGACACGGTGATGCAGGCCCTGCCCCAGCTCTGGGCGTGGAGCTCTTTGGAGACCTGG	exon sense-overlapping	NM_001256325	CACNA1G	voltage-dependent T-type calcium channel subunit alpha-1G isoform 17	+	48638428	48704832	4.92542	3.77287
ASHGA5P019803	0.000336611	0.00657967	2.22305	up	noncoding	NR_046056	CACNA1G	RefSeq	7882	chr17	+	48638428	48704832	CTGGACACGGTGATGCAGGCCCTGCCCCAGCTCTGGGCGTGGAGCTCTTTGGAGACCTGG	exon sense-overlapping	NM_001256326	CACNA1G	voltage-dependent T-type calcium channel subunit alpha-1G isoform 18	+	48638428	48704832	4.92542	3.77287
ASHGA5P019803	0.000336611	0.00657967	2.22305	up	noncoding	NR_046056	CACNA1G	RefSeq	7882	chr17	+	48638428	48704832	CTGGACACGGTGATGCAGGCCCTGCCCCAGCTCTGGGCGTGGAGCTCTTTGGAGACCTGG	exon sense-overlapping	NM_001256327	CACNA1G	voltage-dependent T-type calcium channel subunit alpha-1G isoform 19	+	48638428	48704832	4.92542	3.77287
ASHGA5P019803	0.000336611	0.00657967	2.22305	up	noncoding	NR_046056	CACNA1G	RefSeq	7882	chr17	+	48638428	48704832	CTGGACACGGTGATGCAGGCCCTGCCCCAGCTCTGGGCGTGGAGCTCTTTGGAGACCTGG	exon sense-overlapping	NM_001256328	CACNA1G	voltage-dependent T-type calcium channel subunit alpha-1G isoform 20	+	48638428	48704832	4.92542	3.77287
ASHGA5P019803	0.000336611	0.00657967	2.22305	up	noncoding	NR_046056	CACNA1G	RefSeq	7882	chr17	+	48638428	48704832	CTGGACACGGTGATGCAGGCCCTGCCCCAGCTCTGGGCGTGGAGCTCTTTGGAGACCTGG	exon sense-overlapping	NM_001256329	CACNA1G	voltage-dependent T-type calcium channel subunit alpha-1G isoform 21	+	48638428	48704832	4.92542	3.77287
ASHGA5P019803	0.000336611	0.00657967	2.22305	up	noncoding	NR_046056	CACNA1G	RefSeq	7882	chr17	+	48638428	48704832	CTGGACACGGTGATGCAGGCCCTGCCCCAGCTCTGGGCGTGGAGCTCTTTGGAGACCTGG	exon sense-overlapping	NM_001256330	CACNA1G	voltage-dependent T-type calcium channel subunit alpha-1G isoform 22	+	48638428	48704832	4.92542	3.77287
ASHGA5P019803	0.000336611	0.00657967	2.22305	up	noncoding	NR_046056	CACNA1G	RefSeq	7882	chr17	+	48638428	48704832	CTGGACACGGTGATGCAGGCCCTGCCCCAGCTCTGGGCGTGGAGCTCTTTGGAGACCTGG	exon sense-overlapping	NM_001256331	CACNA1G	voltage-dependent T-type calcium channel subunit alpha-1G isoform 23	+	48638428	48704832	4.92542	3.77287
ASHGA5P019803	0.000336611	0.00657967	2.22305	up	noncoding	NR_046056	CACNA1G	RefSeq	7882	chr17	+	48638428	48704832	CTGGACACGGTGATGCAGGCCCTGCCCCAGCTCTGGGCGTGGAGCTCTTTGGAGACCTGG	exon sense-overlapping	NM_001256332	CACNA1G	voltage-dependent T-type calcium channel subunit alpha-1G isoform 24	+	48638428	48704832	4.92542	3.77287
ASHGA5P019803	0.000336611	0.00657967	2.22305	up	noncoding	NR_046056	CACNA1G	RefSeq	7882	chr17	+	48638428	48704832	CTGGACACGGTGATGCAGGCCCTGCCCCAGCTCTGGGCGTGGAGCTCTTTGGAGACCTGG	exon sense-overlapping	NM_001256333	CACNA1G	voltage-dependent T-type calcium channel subunit alpha-1G isoform 25	+	48638428	48704832	4.92542	3.77287
ASHGA5P019803	0.000336611	0.00657967	2.22305	up	noncoding	NR_046056	CACNA1G	RefSeq	7882	chr17	+	48638428	48704832	CTGGACACGGTGATGCAGGCCCTGCCCCAGCTCTGGGCGTGGAGCTCTTTGGAGACCTGG	exon sense-overlapping	NM_001256334	CACNA1G	voltage-dependent T-type calcium channel subunit alpha-1G isoform 26	+	48638428	48704832	4.92542	3.77287
ASHGA5P019803	0.000336611	0.00657967	2.22305	up	noncoding	NR_046056	CACNA1G	RefSeq	7882	chr17	+	48638428	48704832	CTGGACACGGTGATGCAGGCCCTGCCCCAGCTCTGGGCGTGGAGCTCTTTGGAGACCTGG	exon sense-overlapping	NM_001256359	CACNA1G	voltage-dependent T-type calcium channel subunit alpha-1G isoform 27	+	48638428	48704832	4.92542	3.77287
ASHGA5P019803	0.000336611	0.00657967	2.22305	up	noncoding	NR_046056	CACNA1G	RefSeq	7882	chr17	+	48638428	48704832	CTGGACACGGTGATGCAGGCCCTGCCCCAGCTCTGGGCGTGGAGCTCTTTGGAGACCTGG	exon sense-overlapping	NM_001256360	CACNA1G	voltage-dependent T-type calcium channel subunit alpha-1G isoform 28	+	48638428	48704832	4.92542	3.77287
ASHGA5P019803	0.000336611	0.00657967	2.22305	up	noncoding	NR_046056	CACNA1G	RefSeq	7882	chr17	+	48638428	48704832	CTGGACACGGTGATGCAGGCCCTGCCCCAGCTCTGGGCGTGGAGCTCTTTGGAGACCTGG	exon sense-overlapping	NM_001256361	CACNA1G	voltage-dependent T-type calcium channel subunit alpha-1G isoform 29	+	48638428	48704832	4.92542	3.77287
ASHGA5P019803	0.000336611	0.00657967	2.22305	up	noncoding	NR_046056	CACNA1G	RefSeq	7882	chr17	+	48638428	48704832	CTGGACACGGTGATGCAGGCCCTGCCCCAGCTCTGGGCGTGGAGCTCTTTGGAGACCTGG	exon sense-overlapping	NM_018896	CACNA1G	voltage-dependent T-type calcium channel subunit alpha-1G isoform 1	+	48638428	48704832	4.92542	3.77287
ASHGA5P019803	0.000336611	0.00657967	2.22305	up	noncoding	NR_046056	CACNA1G	RefSeq	7882	chr17	+	48638428	48704832	CTGGACACGGTGATGCAGGCCCTGCCCCAGCTCTGGGCGTGGAGCTCTTTGGAGACCTGG	exon sense-overlapping	NM_198376	CACNA1G	voltage-dependent T-type calcium channel subunit alpha-1G isoform 14	+	48638428	48704832	4.92542	3.77287
ASHGA5P019803	0.000336611	0.00657967	2.22305	up	noncoding	NR_046056	CACNA1G	RefSeq	7882	chr17	+	48638428	48704832	CTGGACACGGTGATGCAGGCCCTGCCCCAGCTCTGGGCGTGGAGCTCTTTGGAGACCTGG	exon sense-overlapping	NM_198377	CACNA1G	voltage-dependent T-type calcium channel subunit alpha-1G isoform 2	+	48638428	48704832	4.92542	3.77287
ASHGA5P019803	0.000336611	0.00657967	2.22305	up	noncoding	NR_046056	CACNA1G	RefSeq	7882	chr17	+	48638428	48704832	CTGGACACGGTGATGCAGGCCCTGCCCCAGCTCTGGGCGTGGAGCTCTTTGGAGACCTGG	exon sense-overlapping	NM_198378	CACNA1G	voltage-dependent T-type calcium channel subunit alpha-1G isoform 9	+	48638428	48704832	4.92542	3.77287
ASHGA5P019803	0.000336611	0.00657967	2.22305	up	noncoding	NR_046056	CACNA1G	RefSeq	7882	chr17	+	48638428	48704832	CTGGACACGGTGATGCAGGCCCTGCCCCAGCTCTGGGCGTGGAGCTCTTTGGAGACCTGG	exon sense-overlapping	NM_198379	CACNA1G	voltage-dependent T-type calcium channel subunit alpha-1G isoform 7	+	48638428	48704832	4.92542	3.77287
ASHGA5P019803	0.000336611	0.00657967	2.22305	up	noncoding	NR_046056	CACNA1G	RefSeq	7882	chr17	+	48638428	48704832	CTGGACACGGTGATGCAGGCCCTGCCCCAGCTCTGGGCGTGGAGCTCTTTGGAGACCTGG	exon sense-overlapping	NM_198380	CACNA1G	voltage-dependent T-type calcium channel subunit alpha-1G isoform 5	+	48638428	48704832	4.92542	3.77287
ASHGA5P019803	0.000336611	0.00657967	2.22305	up	noncoding	NR_046056	CACNA1G	RefSeq	7882	chr17	+	48638428	48704832	CTGGACACGGTGATGCAGGCCCTGCCCCAGCTCTGGGCGTGGAGCTCTTTGGAGACCTGG	exon sense-overlapping	NM_198382	CACNA1G	voltage-dependent T-type calcium channel subunit alpha-1G isoform 11	+	48638428	48704832	4.92542	3.77287
ASHGA5P019803	0.000336611	0.00657967	2.22305	up	noncoding	NR_046056	CACNA1G	RefSeq	7882	chr17	+	48638428	48704832	CTGGACACGGTGATGCAGGCCCTGCCCCAGCTCTGGGCGTGGAGCTCTTTGGAGACCTGG	exon sense-overlapping	NM_198383	CACNA1G	voltage-dependent T-type calcium channel subunit alpha-1G isoform 6	+	48638428	48704832	4.92542	3.77287
ASHGA5P019803	0.000336611	0.00657967	2.22305	up	noncoding	NR_046056	CACNA1G	RefSeq	7882	chr17	+	48638428	48704832	CTGGACACGGTGATGCAGGCCCTGCCCCAGCTCTGGGCGTGGAGCTCTTTGGAGACCTGG	exon sense-overlapping	NM_198384	CACNA1G	voltage-dependent T-type calcium channel subunit alpha-1G isoform 8	+	48638428	48704832	4.92542	3.77287
ASHGA5P019803	0.000336611	0.00657967	2.22305	up	noncoding	NR_046056	CACNA1G	RefSeq	7882	chr17	+	48638428	48704832	CTGGACACGGTGATGCAGGCCCTGCCCCAGCTCTGGGCGTGGAGCTCTTTGGAGACCTGG	exon sense-overlapping	NM_198385	CACNA1G	voltage-dependent T-type calcium channel subunit alpha-1G isoform 4	+	48638428	48704832	4.92542	3.77287
ASHGA5P019803	0.000336611	0.00657967	2.22305	up	noncoding	NR_046056	CACNA1G	RefSeq	7882	chr17	+	48638428	48704832	CTGGACACGGTGATGCAGGCCCTGCCCCAGCTCTGGGCGTGGAGCTCTTTGGAGACCTGG	exon sense-overlapping	NM_198386	CACNA1G	voltage-dependent T-type calcium channel subunit alpha-1G isoform 10	+	48638428	48704832	4.92542	3.77287
ASHGA5P019803	0.000336611	0.00657967	2.22305	up	noncoding	NR_046056	CACNA1G	RefSeq	7882	chr17	+	48638428	48704832	CTGGACACGGTGATGCAGGCCCTGCCCCAGCTCTGGGCGTGGAGCTCTTTGGAGACCTGG	exon sense-overlapping	NM_198387	CACNA1G	voltage-dependent T-type calcium channel subunit alpha-1G isoform 12	+	48638428	48704832	4.92542	3.77287
ASHGA5P019803	0.000336611	0.00657967	2.22305	up	noncoding	NR_046056	CACNA1G	RefSeq	7882	chr17	+	48638428	48704832	CTGGACACGGTGATGCAGGCCCTGCCCCAGCTCTGGGCGTGGAGCTCTTTGGAGACCTGG	exon sense-overlapping	NM_198388	CACNA1G	voltage-dependent T-type calcium channel subunit alpha-1G isoform 13	+	48638428	48704832	4.92542	3.77287
ASHGA5P019803	0.000336611	0.00657967	2.22305	up	noncoding	NR_046056	CACNA1G	RefSeq	7882	chr17	+	48638428	48704832	CTGGACACGGTGATGCAGGCCCTGCCCCAGCTCTGGGCGTGGAGCTCTTTGGAGACCTGG	exon sense-overlapping	NM_198396	CACNA1G	voltage-dependent T-type calcium channel subunit alpha-1G isoform 3	+	48638428	48704832	4.92542	3.77287
ASHGA5P028068	0.0128864	0.0472532	2.22046	up	noncoding	ENST00000436252	PGCP1	pseudogene	1358	chr1	-	111925481	111934441	TGACTCCCTCTGCTCACTAGAGTCTTACTTTCTGCAACTAATAAATTGGAAAACTCCAAA								6.74022	5.58936
ASHGA5P042379	2.36511e-05	0.00152508	2.22013	up	noncoding	TCONS_00020900	XLOC_010177	LincRNAs identified by Cabili et al	690	chr12	-	103513591	103518106	ACTCCCTACCTGCAATGGCTTGTCTGCAAACATTTGCCAACTGGCTGAATTTTTCCTTAG	intergenic							4.72335	3.5727
ASHGA5P046130	0.000230629	0.00535675	2.21817	up	noncoding	NR_024440	LOC729609	RefSeq	628	chrX	-	20004934	20007897	TTCTACTTTAGATCCCTAATGCCAGGCAAATAGTCCCTCCTTATTAAGAATAAATGTACT	intergenic							4.56633	3.41696
ASHGA5P026307	0.0352225	0.0831934	2.21649	up	noncoding	AA992250		LincRNAs identified by Khalil et al	552	chr5	+	65372703	65415636	GCGGAGAAGTCTGAAAGCAGGAATTGTGTATAATTCAAAACCAAATATGATTTCTGAAGT	intron sense-overlapping	ENST00000284037	ERBB2IP	erbb2 interacting protein [Source:HGNC Symbol;Acc:15842]	+	65222302	65378377	4.29123	3.14295
ASHGA5P026307	0.0352225	0.0831934	2.21649	up	noncoding	AA992250		LincRNAs identified by Khalil et al	552	chr5	+	65372703	65415636	GCGGAGAAGTCTGAAAGCAGGAATTGTGTATAATTCAAAACCAAATATGATTTCTGAAGT	intron sense-overlapping	ENST00000380935	ERBB2IP	erbb2 interacting protein [Source:HGNC Symbol;Acc:15842]	+	65222401	65376850	4.29123	3.14295
ASHGA5P026307	0.0352225	0.0831934	2.21649	up	noncoding	AA992250		LincRNAs identified by Khalil et al	552	chr5	+	65372703	65415636	GCGGAGAAGTCTGAAAGCAGGAATTGTGTATAATTCAAAACCAAATATGATTTCTGAAGT	intron sense-overlapping	ENST00000380936	ERBB2IP	erbb2 interacting protein [Source:HGNC Symbol;Acc:15842]	+	65222401	65376850	4.29123	3.14295
ASHGA5P026307	0.0352225	0.0831934	2.21649	up	noncoding	AA992250		LincRNAs identified by Khalil et al	552	chr5	+	65372703	65415636	GCGGAGAAGTCTGAAAGCAGGAATTGTGTATAATTCAAAACCAAATATGATTTCTGAAGT	intron sense-overlapping	ENST00000380938	ERBB2IP	erbb2 interacting protein [Source:HGNC Symbol;Acc:15842]	+	65222437	65374764	4.29123	3.14295
ASHGA5P026307	0.0352225	0.0831934	2.21649	up	noncoding	AA992250		LincRNAs identified by Khalil et al	552	chr5	+	65372703	65415636	GCGGAGAAGTCTGAAAGCAGGAATTGTGTATAATTCAAAACCAAATATGATTTCTGAAGT	intron sense-overlapping	ENST00000380939	ERBB2IP	erbb2 interacting protein [Source:HGNC Symbol;Acc:15842]	+	65222401	65376850	4.29123	3.14295
ASHGA5P026307	0.0352225	0.0831934	2.21649	up	noncoding	AA992250		LincRNAs identified by Khalil et al	552	chr5	+	65372703	65415636	GCGGAGAAGTCTGAAAGCAGGAATTGTGTATAATTCAAAACCAAATATGATTTCTGAAGT	intron sense-overlapping	ENST00000380943	ERBB2IP	erbb2 interacting protein [Source:HGNC Symbol;Acc:15842]	+	65222383	65376344	4.29123	3.14295
ASHGA5P026307	0.0352225	0.0831934	2.21649	up	noncoding	AA992250		LincRNAs identified by Khalil et al	552	chr5	+	65372703	65415636	GCGGAGAAGTCTGAAAGCAGGAATTGTGTATAATTCAAAACCAAATATGATTTCTGAAGT	intron sense-overlapping	ENST00000416865	ERBB2IP	erbb2 interacting protein [Source:HGNC Symbol;Acc:15842]	+	65222394	65374579	4.29123	3.14295
ASHGA5P026307	0.0352225	0.0831934	2.21649	up	noncoding	AA992250		LincRNAs identified by Khalil et al	552	chr5	+	65372703	65415636	GCGGAGAAGTCTGAAAGCAGGAATTGTGTATAATTCAAAACCAAATATGATTTCTGAAGT	intron sense-overlapping	ENST00000506030	ERBB2IP	erbb2 interacting protein [Source:HGNC Symbol;Acc:15842]	+	65222600	65374393	4.29123	3.14295
ASHGA5P026307	0.0352225	0.0831934	2.21649	up	noncoding	AA992250		LincRNAs identified by Khalil et al	552	chr5	+	65372703	65415636	GCGGAGAAGTCTGAAAGCAGGAATTGTGTATAATTCAAAACCAAATATGATTTCTGAAGT	intron sense-overlapping	ENST00000508515	ERBB2IP	erbb2 interacting protein [Source:HGNC Symbol;Acc:15842]	+	65284460	65374764	4.29123	3.14295
ASHGA5P026307	0.0352225	0.0831934	2.21649	up	noncoding	AA992250		LincRNAs identified by Khalil et al	552	chr5	+	65372703	65415636	GCGGAGAAGTCTGAAAGCAGGAATTGTGTATAATTCAAAACCAAATATGATTTCTGAAGT	intron sense-overlapping	ENST00000511297	ERBB2IP	erbb2 interacting protein [Source:HGNC Symbol;Acc:15842]	+	65222554	65374374	4.29123	3.14295
ASHGA5P026307	0.0352225	0.0831934	2.21649	up	noncoding	AA992250		LincRNAs identified by Khalil et al	552	chr5	+	65372703	65415636	GCGGAGAAGTCTGAAAGCAGGAATTGTGTATAATTCAAAACCAAATATGATTTCTGAAGT	intron sense-overlapping	NM_001006600	ERBB2IP	protein LAP2 isoform 7	+	65222381	65376851	4.29123	3.14295
ASHGA5P026307	0.0352225	0.0831934	2.21649	up	noncoding	AA992250		LincRNAs identified by Khalil et al	552	chr5	+	65372703	65415636	GCGGAGAAGTCTGAAAGCAGGAATTGTGTATAATTCAAAACCAAATATGATTTCTGAAGT	intron sense-overlapping	NM_001253697	ERBB2IP	protein LAP2 isoform 1	+	65222381	65376851	4.29123	3.14295
ASHGA5P026307	0.0352225	0.0831934	2.21649	up	noncoding	AA992250		LincRNAs identified by Khalil et al	552	chr5	+	65372703	65415636	GCGGAGAAGTCTGAAAGCAGGAATTGTGTATAATTCAAAACCAAATATGATTTCTGAAGT	intron sense-overlapping	NM_001253698	ERBB2IP	protein LAP2 isoform 4	+	65222381	65376851	4.29123	3.14295
ASHGA5P026307	0.0352225	0.0831934	2.21649	up	noncoding	AA992250		LincRNAs identified by Khalil et al	552	chr5	+	65372703	65415636	GCGGAGAAGTCTGAAAGCAGGAATTGTGTATAATTCAAAACCAAATATGATTTCTGAAGT	intron sense-overlapping	NM_001253699	ERBB2IP	protein LAP2 isoform 8	+	65222381	65376851	4.29123	3.14295
ASHGA5P026307	0.0352225	0.0831934	2.21649	up	noncoding	AA992250		LincRNAs identified by Khalil et al	552	chr5	+	65372703	65415636	GCGGAGAAGTCTGAAAGCAGGAATTGTGTATAATTCAAAACCAAATATGATTTCTGAAGT	intron sense-overlapping	NM_001253701	ERBB2IP	protein LAP2 isoform 9	+	65222381	65376851	4.29123	3.14295
ASHGA5P026307	0.0352225	0.0831934	2.21649	up	noncoding	AA992250		LincRNAs identified by Khalil et al	552	chr5	+	65372703	65415636	GCGGAGAAGTCTGAAAGCAGGAATTGTGTATAATTCAAAACCAAATATGATTTCTGAAGT	intron sense-overlapping	NM_018695	ERBB2IP	protein LAP2 isoform 2	+	65222381	65376851	4.29123	3.14295
ASHGA5P025700	3.50052e-05	0.00182854	2.21626	up	noncoding	NR_027093	LOC284798	RefSeq	2559	chr20	-	25121433	25128629	CACAGGGACGGATTCAAGGAGATTCAAAACCCGTGTCACTGCTGCCATCTTCCTAGAATC	intergenic							4.26648	3.11836
ASHGA5P014890	0.0278667	0.0734738	2.21442	up	noncoding	ENST00000423223	RP11-534G20.3	GENCODE	507	chr10	+	29698514	29772114	TGATACCTTTGATCCAGAACTTGCAGCAACAATAGATCCATCTTCGGTTGTGAATCCGGC	intronic antisense	NM_003174	SVIL	supervillin isoform 1	-	29746276	30024730	5.15271	4.00578
ASHGA5P014890	0.0278667	0.0734738	2.21442	up	noncoding	ENST00000423223	RP11-534G20.3	GENCODE	507	chr10	+	29698514	29772114	TGATACCTTTGATCCAGAACTTGCAGCAACAATAGATCCATCTTCGGTTGTGAATCCGGC	intronic antisense	NM_021738	SVIL	supervillin isoform 2	-	29746276	29923901	5.15271	4.00578
ASHGA5P030366	7.48657e-05	0.00292515	2.21292	up	noncoding	ENST00000567527	RP11-701H24.4	GENCODE	1236	chr15	+	25332807	25334043	GAATGTAAGCACTTCTTTCCCAGAGCACTCTGAGTTTCCTCATTTGCAGGGACAAATACT	intergenic							4.5237	3.37775
ASHGA5P033444	0.0286561	0.0746013	2.20923	up	noncoding	ENST00000433131	RP11-385F5.4	GENCODE	494	chr1	-	236703393	236713580	CACCCATGTGGCAGACACTCAAAATCTGTTGTATTTGCTAAATAAATTAATATGGACAAG	exon sense-overlapping	NM_018072	HEATR1	HEAT repeat-containing protein 1	-	236712304	236767841	6.37265	5.2291
ASHGA5P033444	0.0286561	0.0746013	2.20923	up	noncoding	ENST00000433131	RP11-385F5.4	GENCODE	494	chr1	-	236703393	236713580	CACCCATGTGGCAGACACTCAAAATCTGTTGTATTTGCTAAATAAATTAATATGGACAAG	natural antisense	NM_006499	LGALS8	galectin-8 isoform a	+	236686738	236716279	6.37265	5.2291
ASHGA5P033444	0.0286561	0.0746013	2.20923	up	noncoding	ENST00000433131	RP11-385F5.4	GENCODE	494	chr1	-	236703393	236713580	CACCCATGTGGCAGACACTCAAAATCTGTTGTATTTGCTAAATAAATTAATATGGACAAG	natural antisense	NM_201543	LGALS8	galectin-8 isoform b	+	236686738	236716279	6.37265	5.2291
ASHGA5P033444	0.0286561	0.0746013	2.20923	up	noncoding	ENST00000433131	RP11-385F5.4	GENCODE	494	chr1	-	236703393	236713580	CACCCATGTGGCAGACACTCAAAATCTGTTGTATTTGCTAAATAAATTAATATGGACAAG	natural antisense	NM_201544	LGALS8	galectin-8 isoform b	+	236687026	236716279	6.37265	5.2291
ASHGA5P033444	0.0286561	0.0746013	2.20923	up	noncoding	ENST00000433131	RP11-385F5.4	GENCODE	494	chr1	-	236703393	236713580	CACCCATGTGGCAGACACTCAAAATCTGTTGTATTTGCTAAATAAATTAATATGGACAAG	natural antisense	NM_201545	LGALS8	galectin-8 isoform a	+	236681513	236716279	6.37265	5.2291
ASHGA5P031550	0.000417945	0.0074576	2.2069	up	noncoding	ENST00000444923	RP4-745E8.2	GENCODE	229	chr1	-	20620703	20649680	AACTTGCCCTACCCTGCTTCGATGCATAAGCAGTTGACTCAATAAAGATGTGTCTCTGAC	intronic antisense	NM_001039500	VWA5B1	von Willebrand factor A domain-containing protein 5B1 precursor	+	20617411	20681387	6.48639	5.34436
ASHGA5P019564	0.0385582	0.0878975	2.2065	up	noncoding	ENST00000492393	AC016629.2	GENCODE	412	chr19	+	59097651	59100861	CAGAGACAAGGAACAGTAAGAGGACCTTGTGCATGAATAATTTGTTTCCACACTACAGAG	intergenic							5.24091	4.09915
ASHGA5P014823	0.0474997	0.0994764	2.20611	up	noncoding	uc001kem.3	LOC728190	UCSC_knowngene	2340	chr10	-	89003888	89102315	AGGAGAAAAGCAAAACCATATTCCTGCTGCTGTCAGTTTTGATGCACTGAGAAAACTTCA	intergenic							5.54085	4.39935
ASHGA5P015907	2.1621e-05	0.00145524	2.20581	up	noncoding	ENST00000424617	AC068491.1	GENCODE	718	chr2	-	112227094	112237838	AAATCATTTTTTATTTGGACTCACGCCCAAAGTTACGGAGGACCCAGCAACCATCTCCTG	intergenic							4.10281	2.9615
ASHGA5P051526	0.0455449	0.0971709	2.20413	up	noncoding	uc001elb.4	AK094156	UCSC_knowngene	4848	chr1	-	144514872	144519720	ATATTACTGTGAGGTTTTAAAAGTACACAAATAACAATTGTTTTTTGTAAAAAGAAAAAA	intronic antisense	ENST00000538264	AL592284.2	Uncharacterized protein [Source:UniProtKB/TrEMBL;Acc:F5H305]	+	144339737	144521058	6.75395	5.61374
ASHGA5P037998	0.0314964	0.0785843	2.20223	up	noncoding	TCONS_00024244	XLOC_011623	LincRNAs identified by Cabili et al	1840	chr16	+	2693654	2696114	GTTGCAATATTGCCTTTAAAAGCACTTTTAAGCATCAATTGTGAAATAAAAAGCCCGAGC	intergenic							6.69584	5.55687
ASHGA5P040028	1.0045e-05	0.000950662	2.1998	up	noncoding	ENST00000413531	RP11-418J17.1	GENCODE	1154	chr1	+	119683352	119776804	CCCTTGCTCCAAATTTTACTTACTATCTTTTAAATGTCATCCTGCTAGAGTGTAAGTCTT	bidirectional	NM_015836	WARS2	tryptophan--tRNA ligase, mitochondrial isoform 1 precursor	-	119573838	119683295	4.33851	3.20114
ASHGA5P040028	1.0045e-05	0.000950662	2.1998	up	noncoding	ENST00000413531	RP11-418J17.1	GENCODE	1154	chr1	+	119683352	119776804	CCCTTGCTCCAAATTTTACTTACTATCTTTTAAATGTCATCCTGCTAGAGTGTAAGTCTT	bidirectional	NM_201263	WARS2	tryptophan--tRNA ligase, mitochondrial isoform 2 precursor	-	119573838	119683295	4.33851	3.20114
ASHGA5P021401	2.08304e-06	0.000384154	2.19884	up	noncoding	ENST00000531870	RP11-348A11.4	GENCODE	568	chr11	+	33183202	33211840	AACTCTCACCCAGGTTGATTTGTACAAATAGCACAAGAGGACACCAACTCCATGCAGATG	intronic antisense	ENST00000524775	CSTF3	cleavage stimulation factor, 3' pre-RNA, subunit 3, 77kDa [Source:HGNC Symbol;Acc:2485]	-	33163253	33183917	4.08664	2.9499
ASHGA5P022623	0.0326119	0.079846	2.19846	up	noncoding	ENST00000559884	WASH3P	GENCODE	427	chr15	+	102501805	102506958	TCTTCAGCAGCCAACAAATATTTACCCAGCAGTGCTCGTGTGCAAGGCAGTGTGGGAATC	intergenic							5.68204	4.54555
ASHGA5P027229	0.00151147	0.0142947	2.19829	up	noncoding	ENST00000547748	RP11-493L12.3	GENCODE	663	chr12	-	47631516	47672804	TGGGACATTCTGGCAAATTCTGACTCATCACTCCCTTTCTAGAATCCTTAAAGACCATCA	intergenic							5.06092	3.92454
ASHGA5P048461	0.00272348	0.0192545	2.19706	up	noncoding	NR_034148	LOC283143	RefSeq	2256	chr11	-	115626050	115630918	AGGATTTCTAAACCATTTCTGTAAGTCAGCCCTTGAGAACTTGTAGATTTTCTCATCATT	intergenic							4.7414	3.60582
ASHGA5P045485	0.0127077	0.0468335	2.19659	up	noncoding	ENST00000536430	LINC00115	GENCODE	1298	chr1	-	761588	762886	CCTGGATTGTCCTAGAACTTTGTTCCAACAGATTACATGTGTTCATAACGAATAAATTGC	intergenic							6.22352	5.08825
ASHGA5P042217	0.00011087	0.00362528	2.19644	up	noncoding	ENST00000433761	RP1-40E16.2	GENCODE	398	chr6	+	3056123	3056995	TCAGTAGGAGCCCGTCCTCAAAAGGAAAATAACAGAACTTCCTGCTAATCTGGTATTGGG	intergenic							4.49364	3.35847
ASHGA5P022736	6.36742e-05	0.00270635	2.19522	up	noncoding	ENST00000561837	SLC6A10P	GENCODE	578	chr16	-	32893951	32896435	TCTGGAACATCTGTCCCTTGTTCAAAGCTGCTGAGGACTGGAGCTACTGGGTGGCCAGGT	intergenic							4.25105	3.11668
ASHGA5P046185	0.000381122	0.00695919	2.19463	up	noncoding	ENST00000425150	RP11-348F1.3	GENCODE	451	chrX	-	51099795	51139314	TCCTAGAACCTCAGAGGCATGAAGCTAGAATATCTTCCCCTTCAAGGAGAATAAGCCAAG	intergenic							4.96889	3.83492
ASHGA5P023716	0.0011175	0.0122347	2.19409	up	noncoding	HMlincRNA1593+	HMlincRNA1593	LincRNAs identified by Khalil et al	4217	chrX	+	39487152	39491369	ATTTCCATGTGGGTGTGAATCTTTTTATCATGTGCAGATGCTTCACCTCCCTTCTAATTT	intergenic							4.35903	3.2254
ASHGA5P031134	0.00245602	0.018254	2.19294	up	noncoding	uc021thj.1	IGH	UCSC_knowngene	136	chr16	-	33654256	33654392	TTCTCCTGCCAGGCTTCTGGATACACCTTCACCTACTGCTACTTGCACTGGGTGCGATGG	intergenic							5.54174	4.40888
ASHGA5P044443	0.0356117	0.0837379	2.18815	up	noncoding	ENST00000564694	RP11-521I2.3	GENCODE	1142	chr8	-	101925474	101926616	GGGCCTTTAAAGCAAAACACTAACCATGAAGAGTTTTACTTTTCCCAGGAAATGAAATAT	intergenic							5.00686	3.87715
ASHGA5P016507	0.000275641	0.00589626	2.18711	up	noncoding	ENST00000431103	DLG3-AS1	GENCODE	395	chrX	-	69672811	69675844	AAGGACAAAGATTCTCCTATCCTACCAACCCGTGTGATGGACCCTGGACCACAAGAAGAG	intronic antisense	NM_001166278	DLG3	disks large homolog 3 isoform c	+	69674945	69725339	5.80858	4.67955
ASHGA5P016507	0.000275641	0.00589626	2.18711	up	noncoding	ENST00000431103	DLG3-AS1	GENCODE	395	chrX	-	69672811	69675844	AAGGACAAAGATTCTCCTATCCTACCAACCCGTGTGATGGACCCTGGACCACAAGAAGAG	intronic antisense	NM_020730	DLG3	disks large homolog 3 isoform b	+	69672154	69725339	5.80858	4.67955
ASHGA5P016507	0.000275641	0.00589626	2.18711	up	noncoding	ENST00000431103	DLG3-AS1	GENCODE	395	chrX	-	69672811	69675844	AAGGACAAAGATTCTCCTATCCTACCAACCCGTGTGATGGACCCTGGACCACAAGAAGAG	intronic antisense	NM_021120	DLG3	disks large homolog 3 isoform a	+	69664704	69725339	5.80858	4.67955
ASHGA5P018486	0.00943587	0.0390876	2.18637	up	noncoding	NR_028040	GATS	RefSeq	2874	chr7	-	99798277	99869855	TACTTCAATGGGGCCTTGGTGTACCTTGTTGTAGTGTTTGAAAACATCTGAGGCTGCATC	exon sense-overlapping	NM_178831	GATS	putative protein GATS	-	99798277	99869855	5.62022	4.49169
ASHGA5P018486	0.00943587	0.0390876	2.18637	up	noncoding	NR_028040	GATS	RefSeq	2874	chr7	-	99798277	99869855	TACTTCAATGGGGCCTTGGTGTACCTTGTTGTAGTGTTTGAAAACATCTGAGGCTGCATC	intronic antisense	NM_024070	PVRIG	transmembrane protein PVRIG	+	99816870	99819111	5.62022	4.49169
ASHGA5P018486	0.00943587	0.0390876	2.18637	up	noncoding	NR_028040	GATS	RefSeq	2874	chr7	-	99798277	99869855	TACTTCAATGGGGCCTTGGTGTACCTTGTTGTAGTGTTTGAAAACATCTGAGGCTGCATC	natural antisense	NM_012447	STAG3	cohesin subunit SA-3	+	99775537	99812010	5.62022	4.49169
ASHGA5P028909	0.0163755	0.0546897	2.18292	up	noncoding	ENST00000562781	RP11-122A8.4	GENCODE	807	chr13	+	99740072	99740879	TTACCTTGGCTCTCTAAGCTGTATCTACTTCTATACAAGGCGAACAATTTTGTCTTTTTA	intergenic							7.68693	6.56067
ASHGA5P042834	0.00874684	0.0372319	2.18251	up	noncoding	TCONS_00019787	XLOC_009584	LincRNAs identified by Cabili et al	477	chr11	-	123077368	123082410	TGCGTACACTCCCACCCAAGTGCCGTCGGCCTCACCTCTTCTTGACTGGCTTAAGGATAT	intergenic							6.70948	5.58349
ASHGA5P014709	0.00123898	0.0129826	2.1792	up	noncoding	NR_024052	HCG18	RefSeq	6814	chr6	-	30255173	30294927	CAAGGATTAGGTAAAAGTCTTGCAGTGAAAAACCCGAGGACCCTTACCGCAAGTGTCTTT	natural antisense	NM_021253	TRIM39	tripartite motif-containing protein 39 isoform 1	+	30294620	30311506	5.04075	3.91695
ASHGA5P050029	0.0306813	0.0774041	2.17723	up	noncoding	ENST00000580580	RP11-862L9.3	GENCODE	737	chr18	+	74693271	74696118	TAATGAGAGCCGCTGTCTAAGAGTTAAGGGTTTTCTGGGTGACGTTTAACAATAATAAAG	intronic antisense	NM_001025081	MBP	myelin basic protein isoform 1	-	74690788	74729055	4.81761	3.69511
ASHGA5P050029	0.0306813	0.0774041	2.17723	up	noncoding	ENST00000580580	RP11-862L9.3	GENCODE	737	chr18	+	74693271	74696118	TAATGAGAGCCGCTGTCTAAGAGTTAAGGGTTTTCTGGGTGACGTTTAACAATAATAAAG	intronic antisense	NM_001025090	MBP	myelin basic protein isoform 3	-	74690788	74729055	4.81761	3.69511
ASHGA5P050029	0.0306813	0.0774041	2.17723	up	noncoding	ENST00000580580	RP11-862L9.3	GENCODE	737	chr18	+	74693271	74696118	TAATGAGAGCCGCTGTCTAAGAGTTAAGGGTTTTCTGGGTGACGTTTAACAATAATAAAG	intronic antisense	NM_001025092	MBP	myelin basic protein isoform 4	-	74690788	74729055	4.81761	3.69511
ASHGA5P050029	0.0306813	0.0774041	2.17723	up	noncoding	ENST00000580580	RP11-862L9.3	GENCODE	737	chr18	+	74693271	74696118	TAATGAGAGCCGCTGTCTAAGAGTTAAGGGTTTTCTGGGTGACGTTTAACAATAATAAAG	intronic antisense	NM_001025101	MBP	Golli-MBP isoform 1	-	74690788	74844774	4.81761	3.69511
ASHGA5P050029	0.0306813	0.0774041	2.17723	up	noncoding	ENST00000580580	RP11-862L9.3	GENCODE	737	chr18	+	74693271	74696118	TAATGAGAGCCGCTGTCTAAGAGTTAAGGGTTTTCTGGGTGACGTTTAACAATAATAAAG	intronic antisense	NM_002385	MBP	myelin basic protein isoform 2	-	74690788	74729055	4.81761	3.69511
ASHGA5P031988	0.0399142	0.0894478	2.17379	up	noncoding	ENST00000569362	LA16c-444G7.2	GENCODE	465	chr16	+	88227919	88228823	CTGTGTTGTAATCGCACGCTGATCTCACAATAAATAACGTGTGCATGGAACGTGCCTTCA	intergenic							4.55164	3.43142
ASHGA5P050710	0.0158127	0.0535276	2.17219	up	noncoding	uc002uku.3	LOC401022	UCSC_knowngene	4063	chr2	-	177037923	177042841	CAGACCTACTCTTCCGCTCGACCCTTGCAGAGGAGGTGGGGACGGATATGGTATTTGTAG	natural antisense	ENST00000249440	HOXD3	homeobox D3 [Source:HGNC Symbol;Acc:5137]	+	177028804	177039577	5.09	3.97085
ASHGA5P014635	0.0483404	0.100409	2.17135	up	noncoding	ENST00000414075	GAS5	GENCODE	413	chr1	-	173833038	173835344	CTGTGTGGAGCAAGTTTTAAAGAAGCAAAGGACTCAGAATTCATGATTGAAGAAATGCAG	intergenic							8.2288	7.11021
ASHGA5P029371	0.00107693	0.0120077	2.17125	up	noncoding	ENST00000553433	RP11-982M15.7	GENCODE	503	chr14	-	105119884	105121904	TTCTTGCCGTTCGCGGGGTCTGCCTCCAGCAAGTTCTCCTTCAGCATTCTGAGTGTACCA	intergenic							5.00687	3.88834
ASHGA5P047325	0.0310598	0.0779115	2.16816	up	noncoding	uc001iup.3	LOC387647	UCSC_knowngene	3018	chr10	+	29698500	29774636	CGTGTCTTCCACTTTCTCAACACTTAGCATGCTTAATGATACTGGAAATGTATGTAATTA	natural antisense	NM_003174	SVIL	supervillin isoform 1	-	29746276	30024730	4.71648	3.60001
ASHGA5P047325	0.0310598	0.0779115	2.16816	up	noncoding	uc001iup.3	LOC387647	UCSC_knowngene	3018	chr10	+	29698500	29774636	CGTGTCTTCCACTTTCTCAACACTTAGCATGCTTAATGATACTGGAAATGTATGTAATTA	natural antisense	NM_021738	SVIL	supervillin isoform 2	-	29746276	29923901	4.71648	3.60001
ASHGA5P039326	0.00852402	0.0367391	2.16768	up	noncoding	ENST00000504402	RP11-367J11.3	GENCODE	292	chr4	-	7096297	7105056	GCCTCAGCCAAGTGAAATGGGAATCAGGACCATTACAAAGAAATTCAATTAAAATAAAAG	intergenic							4.59151	3.47536
ASHGA5P057244	3.15245e-05	0.00170993	2.16731	up	noncoding	TCONS_00014916	XLOC_006983	LincRNAs identified by Cabili et al	226	chr8	-	5858958	5860623	TCTCCAGTTTTGACATCCTAGCCCCAGATGATGCACCTAAAGTTGAAAAGCTGACTTCCA	intergenic							5.09017	3.97426
ASHGA5P052635	0.0160339	0.0539593	2.16691	up	noncoding	ENST00000454269	HCG18	GENCODE	2430	chr6	-	30258782	30294163	CAAGGATTAGGTAAGTTCTCCCCGCGGTAGACTTCAAATACTCTTTGTCCTGCCCCTGCT	bidirectional	NM_021253	TRIM39	tripartite motif-containing protein 39 isoform 1	+	30294620	30311506	4.97012	3.85448
ASHGA5P052635	0.0160339	0.0539593	2.16691	up	noncoding	ENST00000454269	HCG18	GENCODE	2430	chr6	-	30258782	30294163	CAAGGATTAGGTAAGTTCTCCCCGCGGTAGACTTCAAATACTCTTTGTCCTGCCCCTGCT	bidirectional	NM_172016	TRIM39	tripartite motif-containing protein 39 isoform 2	+	30295007	30311506	4.97012	3.85448
ASHGA5P030991	0.0188175	0.0588589	2.16229	up	noncoding	ENST00000552753	MIR3179-3	GENCODE	543	chr16	-	18505165	18505708	TGCAGGGGTTAGCAAACTATGGCCCACTGTTCTTGTTTTATAAATAAAGTGTTATGAGCA	intergenic							5.98185	4.86929
ASHGA5P037191	0.033713	0.0813868	2.16207	up	noncoding	TCONS_00026160	XLOC_012574	LincRNAs identified by Cabili et al	245	chr17	-	72530813	72534060	TGTTCATCATCATCTTGTTTTAAGGGATTTGCCACATACATGCATATGGATTTCCAAAGG	intergenic							6.06703	4.95461
ASHGA5P018362	0.0439248	0.095279	2.15856	up	noncoding	ENST00000452565	GS1-124K5.4	GENCODE	454	chr7	+	65958772	65960459	CTGAGCCTGTGATGCCGAAGGACCTGTTCAAAGTATTTTCTGTAACTCCAACTGTAACTT	intergenic							6.27024	5.16017
ASHGA5P016149	0.00192151	0.016181	2.15663	up	noncoding	ENST00000427292	RP4-794H19.1	GENCODE	219	chr1	-	59361516	59362375	GTGTGACCAGCCCTGTGCCCATCCTGCTGTGATTCAGGAGTCTCGCAGAAGACATCAGAA	intergenic							11.1453	10.0366
ASHGA5P026852	0.00166416	0.0150591	2.15598	up	noncoding	uc001pwp.2	LOC100499227	UCSC_knowngene	1816	chr11	+	119252487	119397374	AAACTCCTGAACGTAGCAAGGATGCTGGCAGCCAAGCCAATGACTACAAACATGATAAAG	intronic antisense	NM_006288	THY1	thy-1 membrane glycoprotein preproprotein	-	119288654	119294246	4.04128	2.93293
ASHGA5P040331	0.0307817	0.0775498	2.15333	up	noncoding	uc001emj.3	BX647792	UCSC_knowngene	704	chr1	+	145013718	145018395	TTGCTGTATTCTGGGATAAAAGAAAGTCTGATGCAGGGAAAGGGGAAGTTGGAAAAACTG	intronic antisense	NM_001198832	PDE4DIP	myomegalin isoform 8	-	144851423	145039992	6.43445	5.32788
ASHGA5P040331	0.0307817	0.0775498	2.15333	up	noncoding	uc001emj.3	BX647792	UCSC_knowngene	704	chr1	+	145013718	145018395	TTGCTGTATTCTGGGATAAAAGAAAGTCTGATGCAGGGAAAGGGGAAGTTGGAAAAACTG	intronic antisense	NM_022359	PDE4DIP	myomegalin isoform 3	-	144951760	145076186	6.43445	5.32788
ASHGA5P030479	0.0324709	0.0797374	2.15267	up	noncoding	ENST00000561226	OIP5-AS1	GENCODE	775	chr15	+	41576218	41579672	CCGTTAGCTTCAGCAGAAGACGAACATGAAAAATGACTGTAAGCTATTGAAATTTAAGTT	intergenic							4.84861	3.74248
ASHGA5P027596	0.00259548	0.0188448	2.15233	up	noncoding	ENST00000552525	RP11-545P7.4	GENCODE	248	chr12	-	113623428	113629966	GCAATCACGCCGTTTATTCGCACTTGGCAGCAAGACAATGGATGATGTGGGAGGTGCCAG	natural antisense	NM_032848	C12orf52	RBPJ-interacting and tubulin-associated protein	+	113623554	113630119	4.06923	2.96333
ASHGA5P036175	0.0352056	0.0831747	2.15015	up	noncoding	ENST00000458007	AC092620.2	GENCODE	534	chr2	+	139326659	139331818	CTGTGACATAACACCTGAACAATTTCTATGGTATCCTACCCATTTGCTCAGATTCAAACC	exon sense-overlapping	NM_001001664	SPOPL	speckle-type POZ protein-like	+	139259349	139330805	7.83687	6.73243
ASHGA5P058200	0.00293462	0.0202092	2.14565	up	noncoding	TCONS_00028129	XLOC_013487	LincRNAs identified by Cabili et al	481	chr20	+	22753434	22754566	ATATTTACTGAACACGTACATGAAAAGCACAGTGACCACCTCTTTGGCCGGGAAGTGAGT	intergenic							5.28716	4.18574
ASHGA5P049077	9.07478e-05	0.00325598	2.1448	up	noncoding	ENST00000546674	MIR3179-1	GENCODE	676	chr16	+	14995355	14996031	TGTGATCCTGGGGTTGTTGAAGATGCCACCCATCTACATATTCTTTCAGATGCACAATAT	intergenic							4.47638	3.37554
ASHGA5P014966	0.0388272	0.0882043	2.14326	up	noncoding	uc010vdn.2	RRN3P2	UCSC_knowngene	2314	chr16	+	29086162	29128038	CACAGAGCCTTGCAAATAATAGCAAGATATGTACCATTGAATGTTACGTTCATAACTTAC	intergenic							6.00768	4.90787
ASHGA5P041138	0.00153796	0.0143901	2.14246	up	noncoding	ENST00000508065	GTF2H2B	pseudogene	1432	chr5	+	69711178	69743353	ATAAGATTCCAGCTCCTTCAGGTGTTTGATTCCAGCATGTAGTATACATTGTATGTGTTA								9.69798	8.59871
ASHGA5P032711	2.22193e-05	0.00148467	2.14122	up	noncoding	ENST00000438158	RP11-400N13.3	GENCODE	562	chr1	-	222215046	222238105	TGGTCAGTGCTCAACAAATGCCCCTACTGATTCAAGTATATGAGCAAGTCAAATAAAAAA	intergenic							4.08752	2.98909
ASHGA5P039011	0.0490103	0.101496	2.14036	up	noncoding	ENST00000499077	NUDT16P	GENCODE	2208	chr3	+	131080741	131083966	CTACTAAATGCCAGGTACTATAAAAGGTATAGAGAGCCATCCTTGCTCTCCAAGACTCCA	intergenic							5.33619	4.23834
ASHGA5P023193	0.000206483	0.00503501	2.13843	up	noncoding	ENST00000573075	MIR22HG	GENCODE	556	chr17	-	1616176	1619541	GGCTCAAACAACCCAAGCCCTGATCCATTCTCACCTAGCGGCTACAGGAAGCTGTGTCTG	bidirectional	NM_001163673	WDR81	WD repeat-containing protein 81 isoform 3	+	1619816	1641893	5.24474	4.14819
ASHGA5P023193	0.000206483	0.00503501	2.13843	up	noncoding	ENST00000573075	MIR22HG	GENCODE	556	chr17	-	1616176	1619541	GGCTCAAACAACCCAAGCCCTGATCCATTCTCACCTAGCGGCTACAGGAAGCTGTGTCTG	bidirectional	NM_152348	WDR81	WD repeat-containing protein 81 isoform 2	+	1619816	1641893	5.24474	4.14819
ASHGA5P054617	0.0333119	0.0807843	2.136	up	noncoding	ENST00000528844	RP11-383C5.4	GENCODE	718	chr10	-	127395805	127408115	CCATAAAACTGATTGGACATAATTGGTGTGGGTTTATGATTTGTTTTGGAAAAACCTGAG	natural antisense	NM_001202438	C10orf137	erythroid differentiation-related factor 1 isoform 1	+	127408083	127452712	5.05745	3.96254
ASHGA5P054617	0.0333119	0.0807843	2.136	up	noncoding	ENST00000528844	RP11-383C5.4	GENCODE	718	chr10	-	127395805	127408115	CCATAAAACTGATTGGACATAATTGGTGTGGGTTTATGATTTGTTTTGGAAAAACCTGAG	natural antisense	NM_015608	C10orf137	erythroid differentiation-related factor 1 isoform 2	+	127408083	127452712	5.05745	3.96254
ASHGA5P040867	0.00284152	0.0198262	2.13527	up	noncoding	TCONS_00021760	XLOC_010354	LincRNAs identified by Cabili et al	1121	chr13	+	40177555	40215175	TTCCAGATGATACTCACCCTAACTGCCCAAGATGGACAACTAATCAAAACAAGCTCAGGC	intergenic							4.55465	3.46023
ASHGA5P046702	0.0400438	0.0896223	2.13498	up	noncoding	NR_027456	LOC100272228	RefSeq	3285	chrX	+	149106765	149185018	GAGCACTGCTGATTGGAGACATATTAAGTAAAATGTACTGTGGAAATGAGATAAAACCTT	natural antisense	ENST00000370406	CXorf40B	chromosome X open reading frame 40B [Source:HGNC Symbol;Acc:17402]	-	149100414	149107029	5.78554	4.69132
ASHGA5P044998	2.28994e-05	0.00150825	2.12761	up	noncoding	ENST00000524355	CTD-2552K11.2	GENCODE	566	chr8	+	124626464	124670810	GAAGAAGACTTTTCCTCGTCTTATCCCTGGCAAAGACTCTAATGATGCTGAAATTCTTAG	intronic antisense	NM_001081675	KLHL38	kelch-like protein 38	-	124657914	124665190	4.03843	2.9492
ASHGA5P019576	0.0273061	0.0726042	2.12736	up	noncoding	ENST00000493248	RP4-545C24.1	GENCODE	531	chr7	+	143892611	143947598	CCCTGGAGGGTGGAGATATTTGCTGGTCAAAGATATTAAAGTAATTGTGAAATAAAAGAA	intronic antisense	NM_001001802	OR2A42	olfactory receptor 2A1/2A42	-	143929003	143929936	6.00328	4.91421
ASHGA5P019576	0.0273061	0.0726042	2.12736	up	noncoding	ENST00000493248	RP4-545C24.1	GENCODE	531	chr7	+	143892611	143947598	CCCTGGAGGGTGGAGATATTTGCTGGTCAAAGATATTAAAGTAATTGTGAAATAAAAGAA	intronic antisense	NM_001005287	OR2A1	olfactory receptor 2A1/2A42	-	143929003	143929936	6.00328	4.91421
ASHGA5P019576	0.0273061	0.0726042	2.12736	up	noncoding	ENST00000493248	RP4-545C24.1	GENCODE	531	chr7	+	143892611	143947598	CCCTGGAGGGTGGAGATATTTGCTGGTCAAAGATATTAAAGTAATTGTGAAATAAAAGAA	natural antisense	NM_001003702	ARHGEF35	rho guanine nucleotide exchange factor 35	-	143883175	143892791	6.00328	4.91421
ASHGA5P033479	0.00328888	0.0214931	2.12622	up	noncoding	ENST00000583546	RP11-703M24.5	GENCODE	690	chr18	-	2688561	2832921	CGTGAACATCTTGGGAATCTGCAGGTTTGCTTATCATCTGTTAAATATTAAAAAGAGTAC	natural antisense	NM_015295	SMCHD1	structural maintenance of chromosomes flexible hinge domain-containing protein 1	+	2655885	2805015	4.16863	3.08034
ASHGA5P038775	0.0296434	0.0760453	2.12562	up	noncoding	uc003cmy.1	DQ592230	UCSC_knowngene	4060	chr3	+	44159797	44163857	TATGGGTTGCTCTGAAATTAGCCTTTACACTTGGCATTGTGAAAAATCTTTCCAAATCAT	intergenic							5.07495	3.98706
ASHGA5P037073	0.0067149	0.0320487	2.12495	up	noncoding	ENST00000439786	RP4-781B1.2	GENCODE	465	chr20	+	43380450	43383718	TGCTGGAAAAGGAATCTCCCAGTTCTTACACTCACGCCTCTTCACTTTTCTCTCCTACCG	exon sense-overlapping	NM_022358	KCNK15	potassium channel subfamily K member 15 precursor	+	43374487	43380954	5.84168	4.75425
ASHGA5P037073	0.0067149	0.0320487	2.12495	up	noncoding	ENST00000439786	RP4-781B1.2	GENCODE	465	chr20	+	43380450	43383718	TGCTGGAAAAGGAATCTCCCAGTTCTTACACTCACGCCTCTTCACTTTTCTCTCCTACCG	natural antisense	NM_001205317	RIMS4	regulating synaptic membrane exocytosis protein 4 isoform 1	-	43380444	43438979	5.84168	4.75425
ASHGA5P037073	0.0067149	0.0320487	2.12495	up	noncoding	ENST00000439786	RP4-781B1.2	GENCODE	465	chr20	+	43380450	43383718	TGCTGGAAAAGGAATCTCCCAGTTCTTACACTCACGCCTCTTCACTTTTCTCTCCTACCG	natural antisense	NM_182970	RIMS4	regulating synaptic membrane exocytosis protein 4 isoform 2	-	43380444	43438979	5.84168	4.75425
ASHGA5P030154	0.0110964	0.0432723	2.12438	up	noncoding	ENST00000563568	RP11-69H7.3	GENCODE	206	chr15	-	75503641	75504508	CCAGATGCTTTAATGGGCTGCCTCCAGGGCCCATCGGCTCATCAGAATCCCTTAAATGAG	natural antisense	NM_015492	C15orf39	uncharacterized protein C15orf39	+	75494220	75504510	5.04471	3.95767
ASHGA5P045887	0.0023723	0.017945	2.12382	up	noncoding	ENST00000435915	RP11-217B7.2	GENCODE	469	chr9	+	107689833	107691173	GGACCCGAGAGGAACATCTTACTGCTTCTCTTCATAAATTGAGAGGAAGGAGGCCACAAA	intronic antisense	NM_005502	ABCA1	ATP-binding cassette sub-family A member 1	-	107543283	107690527	4.8506	3.76394
ASHGA5P051151	0.0081409	0.0357633	2.12294	up	noncoding	uc002zdj.1	DQ577420	UCSC_knowngene	460	chr21	+	44985069	44985529	GGCCGTCACCAAGTACACCAGCGCTAAGTAAACTTGCCAAATTGATGCCTGCAGCTCCTG	intronic antisense	NM_007031	HSF2BP	heat shock factor 2-binding protein	-	44949071	45079374	6.1322	5.04613
ASHGA5P043242	0.0388554	0.0882043	2.12153	up	noncoding	uc010lhv.1	AK091729	UCSC_knowngene	1986	chr7	-	100893615	100895601	TCCACAGGCATAGAATCCATGTGACTGTGACTTTAAGGCTGTATATTATTCCATTATATT	exon sense-overlapping	ENST00000435848	FIS1	fission 1 (mitochondrial outer membrane) homolog (S. cerevisiae) [Source:HGNC Symbol;Acc:21689]	-	100882941	100895414	5.57256	4.48746
ASHGA5P043242	0.0388554	0.0882043	2.12153	up	noncoding	uc010lhv.1	AK091729	UCSC_knowngene	1986	chr7	-	100893615	100895601	TCCACAGGCATAGAATCCATGTGACTGTGACTTTAAGGCTGTATATTATTCCATTATATT	exon sense-overlapping	ENST00000474120	FIS1	fission 1 (mitochondrial outer membrane) homolog (S. cerevisiae) [Source:HGNC Symbol;Acc:21689]	-	100882874	100895597	5.57256	4.48746
ASHGA5P041667	0.0104841	0.0418319	2.12097	up	noncoding	ENST00000472178	LINC00518	GENCODE	853	chr6	-	10429941	10434728	GGTTTTATGTAGTGAATTTGGCTAAAATGGTAGAGCTCCCTGATTCTAACCTCCCTGCAG	intergenic							5.84181	4.75708
ASHGA5P038651	0.000804234	0.0105789	2.12023	up	noncoding	ENST00000441644	AC023797.1	GENCODE	348	chr3	-	196358368	196359458	CAGCGAACCTCAGTCACTGACACTCAAAAGAAGGAATTATTTCAACTCAATAATAAACAA	intergenic							6.57964	5.49542
ASHGA5P018377	0.0497938	0.102488	2.12019	up	noncoding	uc010gua.3	GUSBP11	UCSC_knowngene	1079	chr22	-	23980674	24051428	TTTATCTGTGCATGAACAGGACCTGCTGAAGCTCACACCCGTGGACCACCCAGACTGCCT	intronic antisense	NM_153615	RGL4	ral-GDS-related protein precursor	+	24033047	24041363	7.12553	6.04134
ASHGA5P020755	0.000264355	0.00577635	2.11838	up	noncoding	ENST00000519427	RP11-313C15.1	GENCODE	1722	chr8	+	73644279	73664078	GTGACCCACTCATTCTCTTATGTGGACATCACAATTTACCTGTTCTCCCAGCAGTGGATA	intron sense-overlapping	NM_004770	KCNB2	potassium voltage-gated channel subfamily B member 2	+	73449625	73850584	4.68198	3.59902
ASHGA5P048284	0.00125928	0.0131207	2.11831	up	noncoding	ENST00000524619	AP000487.5	GENCODE	392	chr11	-	70227196	70244408	GGAGTTTACCCCACATTCCCTTAATTAAAAAGCCATTAAAATAGTCAACTTTGCTGGGCA	intronic antisense	NM_003626	PPFIA1	liprin-alpha-1 isoform b	+	70116805	70230607	5.88504	4.80212
ASHGA5P019276	0.000811689	0.0106466	2.11681	up	noncoding	NR_028435	AMT	RefSeq	2201	chr3	-	49454210	49460111	TAGTTGCGCACAGGACACCGCTCTATGACTTCCACCTGGCCCACGGCGGGAAAATGGTGG	exon sense-overlapping	NM_000481	AMT	aminomethyltransferase, mitochondrial isoform 1	-	49454210	49460111	5.46831	4.38642
ASHGA5P019276	0.000811689	0.0106466	2.11681	up	noncoding	NR_028435	AMT	RefSeq	2201	chr3	-	49454210	49460111	TAGTTGCGCACAGGACACCGCTCTATGACTTCCACCTGGCCCACGGCGGGAAAATGGTGG	exon sense-overlapping	NM_001164710	AMT	aminomethyltransferase, mitochondrial isoform 2	-	49454210	49460111	5.46831	4.38642
ASHGA5P019276	0.000811689	0.0106466	2.11681	up	noncoding	NR_028435	AMT	RefSeq	2201	chr3	-	49454210	49460111	TAGTTGCGCACAGGACACCGCTCTATGACTTCCACCTGGCCCACGGCGGGAAAATGGTGG	exon sense-overlapping	NM_001164711	AMT	aminomethyltransferase, mitochondrial isoform 3	-	49454210	49460111	5.46831	4.38642
ASHGA5P019276	0.000811689	0.0106466	2.11681	up	noncoding	NR_028435	AMT	RefSeq	2201	chr3	-	49454210	49460111	TAGTTGCGCACAGGACACCGCTCTATGACTTCCACCTGGCCCACGGCGGGAAAATGGTGG	exon sense-overlapping	NM_001164712	AMT	aminomethyltransferase, mitochondrial isoform 4	-	49454210	49460111	5.46831	4.38642
ASHGA5P019276	0.000811689	0.0106466	2.11681	up	noncoding	NR_028435	AMT	RefSeq	2201	chr3	-	49454210	49460111	TAGTTGCGCACAGGACACCGCTCTATGACTTCCACCTGGCCCACGGCGGGAAAATGGTGG	exon sense-overlapping	NM_032316	NICN1	nicolin-1	-	49459765	49466757	5.46831	4.38642
ASHGA5P056489	0.000157653	0.00437868	2.11393	up	noncoding	TCONS_00004782	XLOC_001457	LincRNAs identified by Cabili et al	1222	chr2	+	46874504	46877634	TTTGAAAATCCAATTGTAAGCCCATCTGTGTTTGCTCAGCCCTGTGTGTGCAACAGAGGT	intergenic							4.8244	3.74447
ASHGA5P021134	0.0278029	0.0733722	2.11346	up	noncoding	ENST00000525855	RP11-958J22.1	GENCODE	572	chr11	-	45552869	45564023	ATCTCTTCATCCAAGCAGAGCTGTGGATCACACCGCTGTAGTACCCCAGCCTCTCTACTG	intergenic							7.02069	5.94108
ASHGA5P047774	0.0402963	0.0900126	2.11345	up	noncoding	ENST00000430326	RP11-109A6.4	GENCODE	2705	chr10	+	131581116	131584811	TGTGGTTCTGACAAACCAGCTGGAGAAAAGCATTTCTGAAAAGAACTGTTTTAAGTTATT	intergenic							5.88203	4.80244
ASHGA5P025774	0.00208239	0.0167994	2.11085	up	noncoding	NR_036454	CHMP3	RefSeq	2953	chr2	-	86730552	86790620	CAAAGAACTGCGGTCTTGCGAGTGGCTGGTTCCCTGCAGAAGAGCACAGAAGTGATGAAG	exon sense-overlapping	NM_001005753	CHMP3	charged multivesicular body protein 3 isoform 2	-	86730552	86790620	4.19593	3.1181
ASHGA5P025774	0.00208239	0.0167994	2.11085	up	noncoding	NR_036454	CHMP3	RefSeq	2953	chr2	-	86730552	86790620	CAAAGAACTGCGGTCTTGCGAGTGGCTGGTTCCCTGCAGAAGAGCACAGAAGTGATGAAG	exon sense-overlapping	NM_001193517	CHMP3	charged multivesicular body protein 3 isoform 3	-	86730552	86790620	4.19593	3.1181
ASHGA5P025774	0.00208239	0.0167994	2.11085	up	noncoding	NR_036454	CHMP3	RefSeq	2953	chr2	-	86730552	86790620	CAAAGAACTGCGGTCTTGCGAGTGGCTGGTTCCCTGCAGAAGAGCACAGAAGTGATGAAG	exon sense-overlapping	NM_001198954	RNF103-CHMP3	RNF103-CHMP3 protein	-	86730552	86948245	4.19593	3.1181
ASHGA5P025774	0.00208239	0.0167994	2.11085	up	noncoding	NR_036454	CHMP3	RefSeq	2953	chr2	-	86730552	86790620	CAAAGAACTGCGGTCTTGCGAGTGGCTGGTTCCCTGCAGAAGAGCACAGAAGTGATGAAG	exon sense-overlapping	NM_016079	CHMP3	charged multivesicular body protein 3 isoform 1	-	86730552	86790620	4.19593	3.1181
ASHGA5P021550	0.000249321	0.00560251	2.11002	up	noncoding	ENST00000534789	NAPSB	GENCODE	697	chr19	-	50837890	50848020	TTCTTCAGTGTGCCCTGCTTGTGAAGGTGGGCTCACGGCTGACTCTCTGTGCCCAGGGCT	intronic antisense	ENST00000542413	NR1H2	nuclear receptor subfamily 1, group H, member 2 [Source:HGNC Symbol;Acc:7965]	+	50832948	50886218	4.09317	3.01591
ASHGA5P047365	0.000121168	0.00380488	2.10988	up	noncoding	TCONS_00014964	XLOC_007047	LincRNAs identified by Cabili et al	268	chr8	-	30593692	30594132	GGCAGACTTGCTATGTCCCTCTGAAAATTTCTTTCCCTTTACTGTATAACTTGCTTTTTG	intergenic							4.86071	3.78355
ASHGA5P031673	7.85709e-05	0.00299381	2.10986	up	noncoding	uc002dzu.3	BC073928	UCSC_knowngene	1123	chr16	+	30887232	30906539	GGTTCCCTGGGCATATGTATTCTGTGAAAATCCATCACATGACTTAAATAAAATGTACAT	natural antisense	NM_004765	BCL7C	B-cell CLL/lymphoma 7 protein family member C	-	30899115	30905399	8.14379	7.06664
ASHGA5P040608	0.0195064	0.05997	2.1087	up	noncoding	NR_046368	HP07349	RefSeq	457	chr5	-	108063525	108063962	GTTGTGGGGTTGAATCCTTGCCGTGGTTTTGTAAGAATTAAATGAGATAATGAACGCGAA	intergenic							6.19626	5.11991
ASHGA5P044549	0.0172907	0.0562391	2.10726	up	noncoding	ENST00000568248	AC083843.1	GENCODE	6253	chr8	-	135804262	135810515	AATTATTTCCCAGTTACCATGTTTTAAAACAGCCTCTCAGAATTCCCCACTTCTAATTTC	intergenic							8.72393	7.64856
ASHGA5P026736	0.00471851	0.0264013	2.1051	up	noncoding	ENST00000543573	RP11-712B9.2	GENCODE	755	chr11	+	94965734	94967268	CTCCACCCCTTTTGTTGTCTGGTATGTTTAAAACAAGAAAGAACTTTAGAAAAGTAGGAT	bidirectional	ENST00000278499	SESN3	sestrin 3 [Source:HGNC Symbol;Acc:23060]	-	94906311	94965705	9.77489	8.701
ASHGA5P026736	0.00471851	0.0264013	2.1051	up	noncoding	ENST00000543573	RP11-712B9.2	GENCODE	755	chr11	+	94965734	94967268	CTCCACCCCTTTTGTTGTCTGGTATGTTTAAAACAAGAAAGAACTTTAGAAAAGTAGGAT	bidirectional	ENST00000542176	SESN3	sestrin 3 [Source:HGNC Symbol;Acc:23060]	-	94924628	94965691	9.77489	8.701
ASHGA5P013065	0.000903429	0.0110338	2.10323	up	noncoding	ENST00000537780	H1FX-AS1	GENCODE	362	chr3	+	129037036	129042342	AGAAGTTGATGCCCTGTGCTTCCTGTACAGCTGCGGAACCGGATGGCTTTCCGTGGCTTT	intergenic							6.09644	5.02383
ASHGA5P054137	0.0181425	0.0578464	2.10314	up	noncoding	NR_038461	LOC100128420	RefSeq	701	chrX	+	135721701	135724588	GAAGGCTTTGATCCCAAGCCTGCAGCCGTAAGAGAAGAACGAGCCCATGAGTTCCAGCCT	intergenic							5.00527	3.93272
ASHGA5P054629	0.0363962	0.0849804	2.10169	up	noncoding	NR_028326	LOC100133161	RefSeq	4614	chr11	-	126986	131920	GTTTTGGTAGGTAATTTATTTGGAGTGAGTTTCTGCGCCAAGCCCGAATTTTTTATTTTA	intergenic							7.3918	6.32025
ASHGA5P029119	0.0420714	0.0925912	2.10159	up	noncoding	ENST00000555403	RP11-247L20.4	GENCODE	446	chr14	-	50793243	50794627	ATTCTGAGTAAGTCTGTATGCTATCAAGAACACAAGAATGCAGGATCATGGGAAATGCAC	intronic antisense	ENST00000358473	ATP5S	ATP synthase, H+ transporting, mitochondrial Fo complex, subunit s (factor B) [Source:HGNC Symbol;Acc:18799]	+	50785951	50802276	5.28245	4.21097
ASHGA5P029119	0.0420714	0.0925912	2.10159	up	noncoding	ENST00000555403	RP11-247L20.4	GENCODE	446	chr14	-	50793243	50794627	ATTCTGAGTAAGTCTGTATGCTATCAAGAACACAAGAATGCAGGATCATGGGAAATGCAC	intronic antisense	ENST00000553905	RP11-247L20.2	ATP synthase coupling factor B-like 1; ATP synthase subunit s, mitochondrial; Uncharacterized protein [Source:UniProtKB/TrEMBL;Acc:Q8WXQ4]	+	50785951	50802276	5.28245	4.21097
ASHGA5P037352	0.0364283	0.0849804	2.09971	up	noncoding	ENST00000423967	AP001058.3	GENCODE	463	chr21	-	45626407	45627282	ACAGCCAGGAGACTGATTTTGTATCCAGAAGTTTCTGTTTCACAATCACTAAACTACTCA	intergenic							4.77159	3.7014
ASHGA5P027588	0.0336473	0.0813268	2.09837	up	noncoding	uc001tsv.2	C12orf47	UCSC_knowngene	932	chr12	-	112277572	112279710	ACCTACACTGCATTCCTCAAAGTAAAATTTAAGTGTGGCTCTGTGCCTATGCTCTCCCCA	bidirectional	NM_003668	MAPKAPK5	MAP kinase-activated protein kinase 5 isoform 1	+	112280278	112331228	5.68596	4.6167
ASHGA5P027588	0.0336473	0.0813268	2.09837	up	noncoding	uc001tsv.2	C12orf47	UCSC_knowngene	932	chr12	-	112277572	112279710	ACCTACACTGCATTCCTCAAAGTAAAATTTAAGTGTGGCTCTGTGCCTATGCTCTCCCCA	bidirectional	NM_139078	MAPKAPK5	MAP kinase-activated protein kinase 5 isoform 2	+	112280278	112331228	5.68596	4.6167
ASHGA5P049517	0.00630865	0.0309109	2.09784	up	noncoding	NR_027163	C17orf76-AS1	RefSeq	1125	chr17	+	16342300	16345340	ACGTCTAATGTCTATCTGACCGCAGTCGCTGAAACCTCTACAACTTAGTTGACCGTAACT	natural antisense	NM_001113567	FAM211A	leucine-rich repeat-containing protein FAM211A isoform 1	-	16345318	16395505	4.47181	3.4029
ASHGA5P049517	0.00630865	0.0309109	2.09784	up	noncoding	NR_027163	C17orf76-AS1	RefSeq	1125	chr17	+	16342300	16345340	ACGTCTAATGTCTATCTGACCGCAGTCGCTGAAACCTCTACAACTTAGTTGACCGTAACT	natural antisense	NM_207387	FAM211A	leucine-rich repeat-containing protein FAM211A isoform 2	-	16345318	16395505	4.47181	3.4029
ASHGA5P035529	0.00520271	0.0280361	2.09739	up	noncoding	ENST00000457706	RP11-63N8.3	GENCODE	821	chr1	+	21912964	21917680	TCCTTGCCCAACCCATGGGGGCCTTGCAATGATTAATAATAATAATGATGATGATAATGG	intergenic							4.42193	3.35334
ASHGA5P051492	0.000708686	0.00995678	2.09674	up	noncoding	uc001ejn.1	BC070106	UCSC_knowngene	1888	chr1	-	143424332	143467651	CTCCGGAAGTGCGGATCCCAGCGGTGGTCGTGTAGCTGAGCAGGCCTGGGGCTTGGTTCT	intergenic							4.16051	3.09236
ASHGA5P035071	0.0372159	0.0859999	2.0947	up	noncoding	ENST00000449259	AC007386.2	GENCODE	2928	chr2	-	65128973	65132271	GGGAGACCTCTGTAATTGTGTACCATGTGCATATATTACCTATTCAGAGAATAATAAAAC	intergenic							4.68453	3.61779
ASHGA5P040486	0.00851234	0.0367391	2.09399	up	noncoding	uc003jxs.4	DQ575504	UCSC_knowngene	806	chr5	-	69194136	69194942	ATGACAACTGCTCCTACGACCCAAAGAGGAACTACAGCAACTACTCTTTAGCATCTGTTG	intergenic							7.94108	6.87483
ASHGA5P028889	0.000314691	0.00634959	2.09209	up	noncoding	uc001vld.1	RBM26-AS1	UCSC_knowngene	1753	chr13	+	79980443	79997087	AGGAGTCTCACAGAGAATTGACTCCTTGCCCACCTATACTACCTTTGTGGGTAGAGACTC	bidirectional	NM_022118	RBM26	RNA-binding protein 26	-	79894099	79979923	4.45126	3.38632
ASHGA5P034264	0.00141125	0.0138096	2.09176	up	noncoding	TCONS_00003940	XLOC_001756	LincRNAs identified by Cabili et al	400	chr2	+	173117100	173145603	TTGGTTTCCCAGGAAAGCTGCTGAGGGCGGGAACCCCAGATGCACAGTTTGGCTCATAAG	intergenic							4.8196	3.75489
ASHGA5P031527	0.031401	0.078481	2.08941	up	noncoding	ENST00000574285	RP11-473I1.9	GENCODE	1914	chr16	+	9198704	9200618	GACCTAGTCATCTGTATGTTAGATTCACAGAGGAATTAAAGAGATAAACATGCATGTGCT	intron sense-overlapping	NM_014117	C16orf72	UPF0472 protein C16orf72	+	9185536	9213555	7.20909	6.14599
ASHGA5P040753	0.0285369	0.0744483	2.08858	up	noncoding	ENST00000425624	RP11-403I13.4	GENCODE	490	chr1	+	149250539	149251326	CTCAAGAGGTTAAAGGTCCCAGATCTAGAAAAAGCAGAAACTGCTGATTGTTCCTTTTTT	intergenic							4.45281	3.39028
ASHGA5P032372	0.0383992	0.0876216	2.08766	up	noncoding	ENST00000583409	CTB-58E17.3	GENCODE	486	chr17	-	36859732	36862514	GAAACTGCACTTAAGGGTTTCTAACGAATTACCTTTACTAGCAAGAATAAAACTGCAAGA	intronic antisense	NM_005937	MLLT6	protein AF-17	+	36861872	36886056	5.35317	4.29128
ASHGA5P030819	0.0130898	0.0475714	2.08538	up	noncoding	ENST00000420498	RP11-297K8.2	GENCODE	379	chr1	-	161123549	161129139	TGTAAACAGATTACTCCGTCCTATATATGACACCTATCATTAAAATCACCGCATAAGGCA	natural antisense	NM_016406	UFC1	ubiquitin-fold modifier-conjugating enzyme 1	+	161123533	161128646	4.82663	3.76632
ASHGA5P026437	0.0495126	0.102183	2.08366	up	noncoding	ENST00000529451	RP11-780O24.1	GENCODE	510	chr11	+	58645774	58660445	GTTTTGGAATAAAGAGAGGATGAATTCCTTTCTTGTGATGAATAAAGGTTGTCAATGGTC	intergenic							4.76708	3.70796
ASHGA5P022904	0.000500851	0.00821408	2.08357	up	noncoding	ENST00000565137	AC026471.6	GENCODE	578	chr16	-	31498690	31499813	ATCCCAGGAGGCGCAGCCCTATACCCGCACCTGGTCGCTGCACCAGTACCAGCCCGAGAC	natural antisense	NM_003041	SLC5A2	sodium/glucose cotransporter 2	+	31494438	31502091	4.86063	3.80157
ASHGA5P042396	0.000185668	0.00479563	2.0834	up	noncoding	TCONS_00019544	XLOC_009342	LincRNAs identified by Cabili et al	281	chr11	+	133913045	133914138	ATGATCTTTCTGGGCTCCTGATGTCCAGACCCTGTCTTGTCTTTCAGCATGTTCAGAATA	intergenic							4.5866	3.52767
ASHGA5P041629	0.0017411	0.0153928	2.08014	up	noncoding	ENST00000434292	RP5-1077H22.1	GENCODE	403	chr6	-	958562	962511	AGCTTCAGTGTGACCTGACCCTGAGCTTTCCAATCCAAAAATAGAAGTAATGTCTATGTC	intergenic							4.54958	3.4929
ASHGA5P047453	0.0497267	0.102442	2.0801	up	noncoding	ENST00000562082	RP11-119F7.5	GENCODE	2295	chr10	+	70458256	70460551	TTTGGTGCACAGCAGGTTGTACATGATTTCATGTTTATGTAGCAAAATGCATTGAAATGT	intergenic							4.57041	3.51376
ASHGA5P019715	0.0140015	0.0495424	2.07936	up	noncoding	ENST00000501652	CTC-228N24.3	GENCODE	1601	chr5	-	127301579	127418666	TGAAAATGCTGTGCAAGCGGTCTTCTCTGTCTTCTTTATGGCCAGTAAAATTCTCCAGAA	bidirectional	NM_001046	SLC12A2	solute carrier family 12 member 2 isoform 1	+	127419482	127525380	4.28255	3.22641
ASHGA5P019715	0.0140015	0.0495424	2.07936	up	noncoding	ENST00000501652	CTC-228N24.3	GENCODE	1601	chr5	-	127301579	127418666	TGAAAATGCTGTGCAAGCGGTCTTCTCTGTCTTCTTTATGGCCAGTAAAATTCTCCAGAA	bidirectional	NM_001256461	SLC12A2	solute carrier family 12 member 2 isoform 2	+	127419482	127525380	4.28255	3.22641
ASHGA5P043106	0.000234558	0.00539367	2.07836	up	noncoding	uc003tvp.3	BC006435	UCSC_knowngene	383	chr7	-	66742731	66743114	AAATCATAGGAAACTGCCCCTGAGCTCACACATATTTCCAATGGTGTCCCCAATTTCAGG	intergenic							7.17835	6.12291
ASHGA5P050584	0.0466283	0.0984114	2.07726	up	noncoding	NR_038386	LOC728537	RefSeq	1382	chr2	+	98286205	98319529	GTGAACCCGACAGACTATGGATTTATCATTTAATAAAGCATTGATTCATTTTTTCAGTCA	intergenic							6.89332	5.83864
ASHGA5P027818	0.00321833	0.0212886	2.07597	up	noncoding	TCONS_00010175	XLOC_004637	LincRNAs identified by Cabili et al	382	chr5	+	172700825	172708051	ATGTGGAACACAGGAGGAGTGAGAAGGGCCTCCCATTTATTTACCATCTACTAAGACGTT	intergenic							4.14574	3.09196
ASHGA5P022693	0.00010273	0.00351213	2.07582	up	noncoding	ENST00000560967	RP11-109D20.2	GENCODE	426	chr15	-	45365689	45366246	CTCAATGAAGGCACACCAATTCCTCTGCTTAAGGACTTCTGTTCACAATGAATTGTATTA	natural antisense	NM_003104	SORD	sorbitol dehydrogenase	+	45315301	45367287	4.19991	3.14623
ASHGA5P033164	0.000999036	0.0115948	2.07528	up	noncoding	ENST00000440729	RP5-956O18.2	GENCODE	861	chr1	-	230394439	230404229	CTCATGCTGCCCCAGGAAAAAGCACATATATCCATATTTTTGTTTGATTTTGTAAAGCTT	intronic antisense	NM_004481	GALNT2	polypeptide N-acetylgalactosaminyltransferase 2 precursor	+	230202955	230417875	5.61299	4.55968
ASHGA5P027261	5.95095e-05	0.00256419	2.07484	up	noncoding	ENST00000550644	RP11-133N21.10	GENCODE	570	chr12	-	49970622	49971288	AGGATTTTAAATCAAGGGAGAGACAGACACCAGTAAAACCCGAGCACATTCTTCCTTGAG	intronic antisense	ENST00000551063	PRPF40B	PRP40 pre-mRNA processing factor 40 homolog B (S. cerevisiae) [Source:HGNC Symbol;Acc:25031]	+	49962154	50024408	4.21188	3.15887
ASHGA5P038913	0.000272374	0.00589626	2.07225	up	noncoding	TCONS_00016279	XLOC_007654	LincRNAs identified by Cabili et al	1793	chr9	-	18419836	18437603	AACACAGAAAAAGAAGGATCTACGCCCTTTGATGAATTCCCAGGAAGCCTTCCCAGATGT	intergenic							3.81564	2.76445
ASHGA5P021628	0.00262295	0.018925	2.07201	up	noncoding	ENST00000536560	RP11-90D4.2	GENCODE	272	chr12	-	8535439	8538323	AATGCAGTGCTGCTTTCTGTCTTGTTATCACATTTCCTTGGAGGAGAGCCCAGCCTTGGT	intergenic							4.32499	3.27396
ASHGA5P044032	0.0267279	0.0717072	2.07187	up	noncoding	NR_028090	LOC202781	RefSeq	2275	chr7	+	154795142	154797413	CTATGTTGGGCATATATCAGTGTAATAAATACATTAGATCCAAATACAGATCATGCTGCC	bidirectional	NM_007349	PAXIP1	PAX-interacting protein 1	-	154735399	154794682	7.12005	6.06912
ASHGA5P019582	0.000527112	0.00837438	2.07074	up	noncoding	ENST00000493616	GLYCTK-AS1	GENCODE	445	chr3	-	52322598	52333040	GCAGAAGAAGATGGACAAGAGCCTAGAAGATCCCAGCCTTGCCACTGGGTATGAGCACAG	intronic antisense	NM_001144951	GLYCTK	glycerate kinase isoform 2	+	52321835	52327021	4.41373	3.36359
ASHGA5P019582	0.000527112	0.00837438	2.07074	up	noncoding	ENST00000493616	GLYCTK-AS1	GENCODE	445	chr3	-	52322598	52333040	GCAGAAGAAGATGGACAAGAGCCTAGAAGATCCCAGCCTTGCCACTGGGTATGAGCACAG	natural antisense	NM_145262	GLYCTK	glycerate kinase isoform 1	+	52321835	52329272	4.41373	3.36359
ASHGA5P032844	0.00272708	0.0192545	2.06983	up	noncoding	ENST00000577181	CTC-297N7.7	GENCODE	558	chr17	+	10516796	10526228	GACCTGCTCAGCTTCCCTTTCTCTAAAATTGCATAATCCTACAAGAATATTTTCCCTTCT	intergenic							5.87562	4.82611
ASHGA5P033404	8.10698e-05	0.00304914	2.06748	up	noncoding	TCONS_00028493	XLOC_013449	LincRNAs identified by Cabili et al	1230	chr20	+	5477924	5493123	ATGTTAAAGCCCTGATAAAATACATGTTTGAGTTCCTTGGGAGTGTCCCTGCCACGGTGT	intergenic							4.25539	3.20751
ASHGA5P029759	4.8613e-05	0.00231271	2.06654	up	noncoding	ENST00000556212	RP11-638I2.9	GENCODE	552	chr14	+	100806168	100806891	TCCCCAACAACCCAATGACCTCTGTAGTGATGTCTCTATCTTACAGGTGAAGGAAATCAG	intronic antisense	NM_004184	WARS	tryptophan--tRNA ligase, cytoplasmic isoform a	-	100800124	100841927	3.99881	2.95159
ASHGA5P029759	4.8613e-05	0.00231271	2.06654	up	noncoding	ENST00000556212	RP11-638I2.9	GENCODE	552	chr14	+	100806168	100806891	TCCCCAACAACCCAATGACCTCTGTAGTGATGTCTCTATCTTACAGGTGAAGGAAATCAG	intronic antisense	NM_173701	WARS	tryptophan--tRNA ligase, cytoplasmic isoform a	-	100800124	100842680	3.99881	2.95159
ASHGA5P029759	4.8613e-05	0.00231271	2.06654	up	noncoding	ENST00000556212	RP11-638I2.9	GENCODE	552	chr14	+	100806168	100806891	TCCCCAACAACCCAATGACCTCTGTAGTGATGTCTCTATCTTACAGGTGAAGGAAATCAG	intronic antisense	NM_213645	WARS	tryptophan--tRNA ligase, cytoplasmic isoform b	-	100800124	100842680	3.99881	2.95159
ASHGA5P029759	4.8613e-05	0.00231271	2.06654	up	noncoding	ENST00000556212	RP11-638I2.9	GENCODE	552	chr14	+	100806168	100806891	TCCCCAACAACCCAATGACCTCTGTAGTGATGTCTCTATCTTACAGGTGAAGGAAATCAG	intronic antisense	NM_213646	WARS	tryptophan--tRNA ligase, cytoplasmic isoform b	-	100800124	100841927	3.99881	2.95159
ASHGA5P029821	0.0309691	0.0777551	2.06388	up	noncoding	TCONS_00016208	XLOC_007598	LincRNAs identified by Cabili et al	1043	chr9	+	137371780	137375298	TCTTTGTGAGGTAGGGTGGAACTTGCATCCTGAACATTAAAGTTTACATGCCAAGGAGGG	intergenic							4.32534	3.27998
ASHGA5P030749	0.000421339	0.00747148	2.06267	up	noncoding	TCONS_00006381	XLOC_002997	LincRNAs identified by Cabili et al	818	chr3	+	195437319	195438452	TTTAATTGAGACCCGGTGTGGAGGGACTTGGCTCCTGGTGAGTGAGTGAATTGAGATGAG	intron sense-overlapping	ENST00000381954	MUC20	mucin 20, cell surface associated [Source:HGNC Symbol;Acc:23282]	+	195343315	195460421	4.657	3.61249
ASHGA5P040534	0.0362224	0.0846444	2.06246	up	noncoding	ENST00000505694	CTC-459I6.1	GENCODE	535	chr5	-	80243515	80256726	GTTTGTTGTATTTTCAAAATTGTGGTATAACTGACTTACAATAAACTTCATATATTTAAA	natural antisense	NM_006909	RASGRF2	ras-specific guanine nucleotide-releasing factor 2	+	80256507	80525981	5.38934	4.34497
ASHGA5P048294	0.00887414	0.0375532	2.06199	up	noncoding	ENST00000532875	CTD-2313N18.4	GENCODE	549	chr11	-	71511586	71515686	TCTTGGTGTCTCAGGGCAAACCCTTTCGAGCAGCGCCTCCCAGTGGCCGGAAGCTGAAAT	natural antisense	NM_001099653	FAM86C1	protein FAM86C1 isoform 3	+	71498556	71512280	6.75562	5.71158
ASHGA5P048294	0.00887414	0.0375532	2.06199	up	noncoding	ENST00000532875	CTD-2313N18.4	GENCODE	549	chr11	-	71511586	71515686	TCTTGGTGTCTCAGGGCAAACCCTTTCGAGCAGCGCCTCCCAGTGGCCGGAAGCTGAAAT	natural antisense	NM_018172	FAM86C1	protein FAM86C1 isoform 1	+	71498556	71512280	6.75562	5.71158
ASHGA5P048294	0.00887414	0.0375532	2.06199	up	noncoding	ENST00000532875	CTD-2313N18.4	GENCODE	549	chr11	-	71511586	71515686	TCTTGGTGTCTCAGGGCAAACCCTTTCGAGCAGCGCCTCCCAGTGGCCGGAAGCTGAAAT	natural antisense	NM_152563	FAM86C1	protein FAM86C1 isoform 2	+	71498556	71512280	6.75562	5.71158
ASHGA5P030988	0.000877683	0.0109817	2.06125	up	noncoding	ENST00000568026	RP11-916L7.1	GENCODE	551	chr16	-	17634187	17634842	TTCTAAGGTCTTTCTAAGAAGGATTCCCACTGGCTGTGCCTATCCCTGGATCAATCATTC	intergenic							4.09668	3.05316
ASHGA5P050116	0.00201936	0.0166173	2.06076	up	noncoding	uc002mxi.4	LOC284454	UCSC_knowngene	2144	chr19	-	13945329	13947473	TCACAAATCACATTGCCAGGGATTTCCAACCGACCCTGAGCTCTGCCACCGAGGATGCTG	intergenic							5.28386	4.24069
ASHGA5P020789	0.0389554	0.0883079	2.06067	up	noncoding	ENST00000519861	RP11-383J24.5	GENCODE	359	chr8	-	125485048	125486595	CATCTTTGAGCAAAAGGAGAGAGGCCATTATGGGGAAAAAGATCCAAAAGGACTCATCTA	bidirectional	NM_007218	RNF139	E3 ubiquitin-protein ligase RNF139	+	125487007	125500859	4.72951	3.6864
ASHGA5P027869	0.000728685	0.0100359	2.06053	up	noncoding	ENST00000535764	RP11-405A12.2	GENCODE	718	chr12	+	19928384	20162871	GAAAAAGTGAGAGAAGCTGAGTCTGCACCCTCAACATGGAGGAAATAAGCTCTCTTAGGA	intergenic							4.40122	3.35821
ASHGA5P020036	2.42433e-06	0.000411528	2.05991	up	noncoding	ENST00000507060	CTD-2269F5.1	GENCODE	552	chr5	+	83680664	83683875	GACAGACCCTTGAAGCATCACTAAGAATGATTGCTTATTGTACATGGATCCAATTCCAGC	bidirectional	NM_005711	EDIL3	EGF-like repeat and discoidin I-like domain-containing protein 3 precursor	-	83238125	83680611	4.58906	3.54648
ASHGA5P034017	0.00379761	0.0234546	2.05979	up	noncoding	TCONS_00004041	XLOC_001880	LincRNAs identified by Cabili et al	373	chr2	+	223605211	223637458	GAGTGCACCTTCTGCATACCTTTGATATCTAATATTCAAGTCATATCCCAGCCCTTGCTC	intergenic							5.17318	4.13068
ASHGA5P052329	0.0301503	0.0767152	2.05971	up	noncoding	ENST00000513626	RP11-213H15.3	GENCODE	2672	chr5	-	90606837	90610219	CTGTCCTCATCTCCCAATGAAAAGGTATTGTAAATAAAGAGAAAGATCAGAGGCTTATTT	intergenic							6.74579	5.70334
ASHGA5P043856	0.0289374	0.0750582	2.05916	up	noncoding	uc003vhq.1	BD495725	UCSC_knowngene	1949	chr7	+	115893169	115895118	GAGAAGGTTATCTAGTTCAGGGCATTGATCTGCTTAGATCTTTTCATCTTAAAGAGAGAA	intron sense-overlapping	NM_015641	TES	testin isoform 1	+	115850546	115898837	5.15086	4.10881
ASHGA5P043856	0.0289374	0.0750582	2.05916	up	noncoding	uc003vhq.1	BD495725	UCSC_knowngene	1949	chr7	+	115893169	115895118	GAGAAGGTTATCTAGTTCAGGGCATTGATCTGCTTAGATCTTTTCATCTTAAAGAGAGAA	intron sense-overlapping	NM_152829	TES	testin isoform 2	+	115863004	115898837	5.15086	4.10881
ASHGA5P022383	0.0356317	0.0837522	2.0583	up	noncoding	ENST00000555866	SNHG10	GENCODE	221	chr14	-	95999250	96000923	CCCAGCTTAGATTCATTGATTCCAGGTAAATCAGAGGAACAAGCAACATGAACAGAAATA	bidirectional	NM_016417	GLRX5	glutaredoxin-related protein 5, mitochondrial precursor	+	96001322	96011055	6.4223	5.38085
ASHGA5P029075	0.0326609	0.0798848	2.05795	up	noncoding	NR_027263	ARHGAP5-AS1	RefSeq	1281	chr14	-	32544624	32545905	AACCAGAAGTACATTTACGGTCTGTCAGTAAAGAAAACAAAAACTGCCTGTTGGTAAAAA	natural antisense	ENST00000555814	ARHGAP5	Rho GTPase activating protein 5 [Source:HGNC Symbol;Acc:675]	+	32545319	32559986	4.91642	3.87521
ASHGA5P037472	0.000773758	0.01032	2.05736	up	noncoding	ENST00000454980	AP000695.4	GENCODE	649	chr21	+	37818119	37833050	CCACTGACCAAACTCCCAAGTCACTTTATATTAAACTTGTTATCAAATCACCCACATAAA	natural antisense	NM_001146077	CLDN14	claudin-14	-	37832919	37948867	4.08918	3.04838
ASHGA5P037472	0.000773758	0.01032	2.05736	up	noncoding	ENST00000454980	AP000695.4	GENCODE	649	chr21	+	37818119	37833050	CCACTGACCAAACTCCCAAGTCACTTTATATTAAACTTGTTATCAAATCACCCACATAAA	natural antisense	NM_001146078	CLDN14	claudin-14	-	37832919	37915117	4.08918	3.04838
ASHGA5P037472	0.000773758	0.01032	2.05736	up	noncoding	ENST00000454980	AP000695.4	GENCODE	649	chr21	+	37818119	37833050	CCACTGACCAAACTCCCAAGTCACTTTATATTAAACTTGTTATCAAATCACCCACATAAA	natural antisense	NM_001146079	CLDN14	claudin-14	-	37832919	37852388	4.08918	3.04838
ASHGA5P037472	0.000773758	0.01032	2.05736	up	noncoding	ENST00000454980	AP000695.4	GENCODE	649	chr21	+	37818119	37833050	CCACTGACCAAACTCCCAAGTCACTTTATATTAAACTTGTTATCAAATCACCCACATAAA	natural antisense	NM_012130	CLDN14	claudin-14	-	37832919	37838739	4.08918	3.04838
ASHGA5P037472	0.000773758	0.01032	2.05736	up	noncoding	ENST00000454980	AP000695.4	GENCODE	649	chr21	+	37818119	37833050	CCACTGACCAAACTCCCAAGTCACTTTATATTAAACTTGTTATCAAATCACCCACATAAA	natural antisense	NM_144492	CLDN14	claudin-14	-	37832919	37852388	4.08918	3.04838
ASHGA5P035428	0.0354294	0.083511	2.05707	up	noncoding	ENST00000450443	AC093818.1	GENCODE	1397	chr2	-	173368166	173421324	AGCCAGGAGGTCATTTATGTTGCCTGGATTTGCTATTGTGCTTCTAATTAAGCTATTTCA	natural antisense	NM_000210	ITGA6	integrin alpha-6 isoform b precursor	+	173292313	173371181	4.58819	3.5476
ASHGA5P035428	0.0354294	0.083511	2.05707	up	noncoding	ENST00000450443	AC093818.1	GENCODE	1397	chr2	-	173368166	173421324	AGCCAGGAGGTCATTTATGTTGCCTGGATTTGCTATTGTGCTTCTAATTAAGCTATTTCA	natural antisense	NM_001079818	ITGA6	integrin alpha-6 isoform a precursor	+	173292313	173371181	4.58819	3.5476
ASHGA5P035428	0.0354294	0.083511	2.05707	up	noncoding	ENST00000450443	AC093818.1	GENCODE	1397	chr2	-	173368166	173421324	AGCCAGGAGGTCATTTATGTTGCCTGGATTTGCTATTGTGCTTCTAATTAAGCTATTTCA	natural antisense	NM_002610	PDK1	pyruvate dehydrogenase kinase, isozyme 1	+	173420778	173463862	4.58819	3.5476
ASHGA5P031040	0.0330382	0.0804637	2.05627	up	noncoding	ENST00000566507	RP11-449H11.1	GENCODE	389	chr16	-	25096912	25114879	CAAGTTCAAGGCTTCTTACTAGTTTTAACTACATTCCCATACCCCTTTTAATCAATCATG	intergenic							8.00025	6.96022
ASHGA5P034882	0.029404	0.075715	2.05466	up	noncoding	ENST00000567540	RP11-254F7.2	GENCODE	1572	chr2	-	10179218	10180790	TCCTGGGCTCACTTACTGACTTTTCAGTCTAAGGGCTTATTGCAATTGGTACATAACGAT	intergenic							5.15455	4.11565
ASHGA5P038523	0.0166481	0.0551991	2.05393	up	noncoding	ENST00000473352	RP11-392A22.2	GENCODE	566	chr3	-	156470851	156534851	AGAAGCACATGTTGGGACTGAAAAAGGACTGCACTAATGAATTCTGTCACAGATGTGTTT	intergenic							4.11364	3.07526
ASHGA5P037027	0.0461502	0.0979398	2.05279	up	noncoding	TCONS_00025471	XLOC_012288	LincRNAs identified by Cabili et al	2793	chr17	+	66179204	66185240	ATGTGTCACTGTGTAAGTTACCACTGCAATATCTTCTGTATGTTGAAAAACTGGTACTTA	intergenic							4.57046	3.53288
ASHGA5P042979	0.00154033	0.0143901	2.05129	up	noncoding	uc003tbj.2	LOC401320	UCSC_knowngene	2829	chr7	-	30606019	30634419	ATACATCAAATTCTCTCCAAGGACACTGTACCCTTGGCTGAAAATTCCCTCCTTAGTCTA	natural antisense	NM_002047	GARS	glycine--tRNA ligase precursor	+	30634180	30673648	9.0169	7.98036
ASHGA5P033148	1.85928e-05	0.00134077	2.04987	up	noncoding	ENST00000433601	AC091132.1	GENCODE	769	chr17	+	43530209	43541431	ATTTGGAAGGAAACCATGCCCCTGCTCTGAAAGAACAGGACGGTAGAGCAAGAAGAAAAT	intronic antisense	NM_014798	PLEKHM1	pleckstrin homology domain-containing family M member 1	-	43513265	43568146	4.38143	3.3459
ASHGA5P033243	0.0355922	0.0837379	2.04929	up	noncoding	ENST00000576602	RP11-670E13.2	GENCODE	618	chr17	+	54946307	54946925	GCATTAGAGGAAGAATATTCTGTAGTCCTGCTTTATTCTGCCATCTTTACCTGGAAATCC	intergenic							6.13954	5.10441
ASHGA5P048150	0.00957849	0.0394829	2.04875	up	noncoding	ENST00000533323	AP000640.8	GENCODE	564	chr11	-	59561583	59562189	AGGAATTCTCCTCAACTACCCAACCCAACTCTATCACTTTATGGCAGTCTGTAAACAGAA	intronic antisense	NM_001178040	STX3	syntaxin-3 isoform 2	+	59522531	59573355	5.42719	4.39244
ASHGA5P048150	0.00957849	0.0394829	2.04875	up	noncoding	ENST00000533323	AP000640.8	GENCODE	564	chr11	-	59561583	59562189	AGGAATTCTCCTCAACTACCCAACCCAACTCTATCACTTTATGGCAGTCTGTAAACAGAA	intronic antisense	NM_004177	STX3	syntaxin-3 isoform 1	+	59522531	59573355	5.42719	4.39244
ASHGA5P039155	0.012686	0.0468243	2.04625	up	noncoding	ENST00000467896	RP11-185E8.1	GENCODE	229	chr3	+	171185872	171187422	ATGGCAGGGCTGAAAATGATTAGTGTTAATTCATTCCAGTTGTGTTACCCTACCCATAAG	intergenic							4.96516	3.93218
ASHGA5P017817	0.0398856	0.0894202	2.04625	up	noncoding	NR_027055	FAM41C	RefSeq	1779	chr1	-	803450	812182	CCCAATGAAGGAACAGCAAGAGGACCTTGTGCATGAATAATTTGTTTCCATACTACAGAG	intergenic							4.6622	3.62922
ASHGA5P018560	0.02093	0.0622046	2.0459	up	noncoding	ENST00000455004	BX284650.2	GENCODE	1523	chr1	+	143699872	143713999	GAAGAAAATGCATGCACCTCTAAACTCTACAGGCACATCATAGATTCCATCGTCCAGCTG	intergenic							5.88113	4.8484
ASHGA5P026294	0.0412397	0.0913235	2.04546	up	noncoding	NR_015451	LINC00294	RefSeq	3322	chr11	+	33097695	33101000	TTCATCATCTCTTCTATACTAGAGCTGCAGTCTTACATTTGCTTACTTCCTGACATCCAC	intron sense-overlapping	ENST00000324357	TCP11L1	t-complex 11 (mouse)-like 1 [Source:HGNC Symbol;Acc:25655]	+	33080517	33127488	6.20376	5.17133
ASHGA5P026294	0.0412397	0.0913235	2.04546	up	noncoding	NR_015451	LINC00294	RefSeq	3322	chr11	+	33097695	33101000	TTCATCATCTCTTCTATACTAGAGCTGCAGTCTTACATTTGCTTACTTCCTGACATCCAC	intron sense-overlapping	ENST00000528962	TCP11L1	t-complex 11 (mouse)-like 1 [Source:HGNC Symbol;Acc:25655]	+	33090232	33127489	6.20376	5.17133
ASHGA5P039568	0.00100161	0.0115948	2.04541	up	noncoding	ENST00000422638	RP4-656G21.1	GENCODE	498	chr1	-	30181697	30182394	GCTAGGCACAGACTCCATCTGCCTCTGCCAGGGAGTTTATTAAATAGTTTATTAAATCTC	intergenic							5.31562	4.28324
ASHGA5P019519	0.000548361	0.00855573	2.04386	up	noncoding	ENST00000489205	AP000221.2	GENCODE	412	chr21	-	26825506	26839042	AGCTCTCTCTGAGACAAAAGCACGTGACTCTGAATGGGGTGGAAGAAGCTGATGAAGTTT	intergenic							4.16212	3.13082
ASHGA5P046236	0.000633087	0.00943085	2.04282	up	noncoding	ENST00000416989	RP11-493K23.1	GENCODE	954	chrX	-	72218439	72222695	TCTCTAGAATGAAGTGCCTGGTCCCAGTTCACCATCTAATATTTATGGAAAGCTTATCAG	bidirectional	NM_001042506	PABPC1L2B	polyadenylate-binding protein 1-like 2	+	72223351	72225551	4.61865	3.58808
ASHGA5P030495	0.0487165	0.101064	2.04105	up	noncoding	ENST00000457799	RP11-367J7.2	GENCODE	414	chr1	-	157644110	157646522	ATCACATAATTTATTACAGGTGTGTTCTGGAATAGTTTCTATAAATTGATCCATTCTTGT	exon sense-overlapping	ENST00000292392	FCRL3	Fc receptor-like 3 [Source:HGNC Symbol;Acc:18506]	-	157646272	157670775	6.37582	5.34651
ASHGA5P030495	0.0487165	0.101064	2.04105	up	noncoding	ENST00000457799	RP11-367J7.2	GENCODE	414	chr1	-	157644110	157646522	ATCACATAATTTATTACAGGTGTGTTCTGGAATAGTTTCTATAAATTGATCCATTCTTGT	exon sense-overlapping	ENST00000368184	FCRL3	Fc receptor-like 3 [Source:HGNC Symbol;Acc:18506]	-	157646271	157670647	6.37582	5.34651
ASHGA5P030495	0.0487165	0.101064	2.04105	up	noncoding	ENST00000457799	RP11-367J7.2	GENCODE	414	chr1	-	157644110	157646522	ATCACATAATTTATTACAGGTGTGTTCTGGAATAGTTTCTATAAATTGATCCATTCTTGT	exon sense-overlapping	ENST00000368186	FCRL3	Fc receptor-like 3 [Source:HGNC Symbol;Acc:18506]	-	157646270	157670528	6.37582	5.34651
ASHGA5P048446	0.0152297	0.0523027	2.03942	up	noncoding	ENST00000529416	RP11-839D17.3	GENCODE	743	chr11	-	113149158	113154712	CACATTTGATGCACATAACAGACTCTCACCGCATTGAAATAAACCCCAGTATGATCATAA	intergenic							5.37319	4.34503
ASHGA5P039750	0.0027545	0.0193887	2.03901	up	noncoding	uc003izq.3	BC087857	UCSC_knowngene	1645	chr4	-	190784613	190860993	TTGCCCTTGTGTTCTTTGTGCGTGATTTATGACAAAATTATGAGACCTTTACATTTGTGG	bidirectional	NM_004477	FRG1	protein FRG1	+	190861973	190884359	4.93508	3.90722
ASHGA5P058048	0.000331989	0.00654178	2.03896	up	noncoding	TCONS_00025730	XLOC_012551	LincRNAs identified by Cabili et al	303	chr17	-	63074408	63087681	TTGATGAATTGGACAAGGAAGCCCTTGGAACAGGATGTAAAAGCAGCACTTTCCATCCAG	intergenic							5.34924	4.32141
ASHGA5P045134	0.0402944	0.0900126	2.03804	up	noncoding	uc003zlo.1	AK021570	UCSC_knowngene	2410	chr9	-	15163621	15166031	CCGTAGTATCACAGAATATGCTGCATTTAGATACAGGTTTAATTTGCCAGATTTTCTCAA	intergenic							6.79896	5.77178
ASHGA5P051064	0.0417273	0.0922039	2.03615	up	noncoding	ENST00000447343	RP4-583P15.10	GENCODE	464	chr20	+	62376039	62377302	CTTTTCACTCAGGAAAAGAAAGAACATGTGAGTGCTTCTGAAAACACAGCAAGAGGACTT	natural antisense	NM_025224	ZBTB46	zinc finger and BTB domain-containing protein 46	-	62375020	62436856	5.85208	4.82624
ASHGA5P019569	0.0491232	0.10163	2.03557	up	noncoding	ENST00000492937	TIPARP-AS1	GENCODE	441	chr3	-	156389650	156392167	ACCCGTTTCGAGTAATAACAGGATGGAGATGGAGTTTCATGACAAAAATGAAGGTGAATA	intronic antisense	ENST00000486483	TIPARP	TCDD-inducible poly(ADP-ribose) polymerase [Source:HGNC Symbol;Acc:23696]	+	156391023	156422928	5.05611	4.03068
ASHGA5P019569	0.0491232	0.10163	2.03557	up	noncoding	ENST00000492937	TIPARP-AS1	GENCODE	441	chr3	-	156389650	156392167	ACCCGTTTCGAGTAATAACAGGATGGAGATGGAGTTTCATGACAAAAATGAAGGTGAATA	natural antisense	ENST00000295924	TIPARP	TCDD-inducible poly(ADP-ribose) polymerase [Source:HGNC Symbol;Acc:23696]	+	156392130	156424559	5.05611	4.03068
ASHGA5P040749	0.0345241	0.0823874	2.03537	up	noncoding	uc010pbe.1	BC062745	UCSC_knowngene	1072	chr1	+	149230715	149232553	TTGTAAGAATGGCATAAAGCCGGTTTCTTGCGGTGGTTATATAATTTTCAGAATGTGTAC	intergenic							4.3772	3.35191
ASHGA5P016482	0.00659716	0.0317331	2.03244	up	noncoding	ENST00000430842	RP1-20B11.2	GENCODE	851	chr6	+	524170	525581	CTGTATCTATATTCAAGTTTCCATCGAGTGTTTCTTTGGCTGCATCCCTCTGTGCCTTCT	intronic antisense	NM_018303	EXOC2	exocyst complex component 2	-	485137	693141	5.50869	4.48548
ASHGA5P037646	0.000622089	0.00932354	2.03242	up	noncoding	ENST00000456740	CTA-747E2.10	GENCODE	539	chr22	-	29495028	29507671	AACAAGAGAAGTGAAAATCCTCGCCCAGGATGGCTTCTCCTTTCACATGCTCCATGAAAT	intronic antisense	NM_001039570	KREMEN1	kremen protein 1 isoform 3 precursor	+	29469065	29542808	4.20166	3.17847
ASHGA5P037646	0.000622089	0.00932354	2.03242	up	noncoding	ENST00000456740	CTA-747E2.10	GENCODE	539	chr22	-	29495028	29507671	AACAAGAGAAGTGAAAATCCTCGCCCAGGATGGCTTCTCCTTTCACATGCTCCATGAAAT	intronic antisense	NM_032045	KREMEN1	kremen protein 1 isoform 2 precursor	+	29469065	29564321	4.20166	3.17847
ASHGA5P027159	0.0462675	0.0979642	2.03183	up	noncoding	ENST00000553105	RP11-996F15.2	GENCODE	2380	chr12	-	29433350	29470781	CTGGTGAAACCTAGGACTTTAAGATGATAGATGAATTTCTGATTATACTTTCCTTTCCCG	natural antisense	NM_018099	FAR2	fatty acyl-CoA reductase 2	+	29376597	29487006	5.1941	4.17132
ASHGA5P032990	0.016175	0.0542956	2.03143	up	noncoding	uc002hdf.3	AX795351	UCSC_knowngene	940	chr17	+	27224849	27225789	TCCATCTGGGGTTACTGTCACTCTCAGGAAGAAATAATCACCCATTATTCCTTCAACCAG	natural antisense	NM_144683	DHRS13	dehydrogenase/reductase SDR family member 13 precursor	-	27224798	27230089	4.42477	3.40228
ASHGA5P029409	0.00426367	0.0250093	2.02878	up	noncoding	TCONS_00017619	XLOC_008307	LincRNAs identified by Cabili et al	1340	chrY	-	2481028	2483388	GAGAAAGAATGTCATTTGTAAATCAACTGTGCTGCCTGGACCCAGTTGGGACTCTGAATC	intergenic							4.16441	3.14379
ASHGA5P017781	0.00303932	0.0205134	2.02438	up	noncoding	ENST00000445680	RP11-552M11.4	GENCODE	415	chr1	-	111981259	111983986	GCCTTCTATACTGTTCTCTGGTCCACCAAGGGCTATGAGGCTCACCCCTTGGATGGTGCT	exon sense-overlapping	NM_024102	WDR77	methylosome protein 50	-	111982511	111991830	7.31259	6.29511
ASHGA5P014500	0.0259656	0.0706178	2.02431	up	noncoding	NR_024373	LOC541471	RefSeq	557	chr2	-	112186885	112252692	CCTCTCCCTGAATAACTGGGAGATGAAACAGGAAGCTCTATGACACACTTGATCGAATAT	intergenic							6.07385	5.05642
ASHGA5P051300	0.0307895	0.0775498	2.02351	up	noncoding	ENST00000423311	CTA-714B7.5	GENCODE	648	chr22	-	35515816	35627049	CACCTTCACGATGTTTCTCTTGGTCAAAAACACACTCAAGTCGTCTCCAAGTTCGAAGCA	intergenic							7.41707	6.40021
ASHGA5P018343	0.0136226	0.0486619	2.02348	up	noncoding	NR_036608	SRSF2	RefSeq	2112	chr17	-	74730196	74733493	TAAGAAAATGCTGCGGTCTCCTGTTTGATAAAAGAATATTGGCCAGTATTGCAGATTTTA	exon sense-overlapping	NM_001195427	SRSF2	serine/arginine-rich splicing factor 2	-	74730196	74733493	4.46355	3.44671
ASHGA5P018343	0.0136226	0.0486619	2.02348	up	noncoding	NR_036608	SRSF2	RefSeq	2112	chr17	-	74730196	74733493	TAAGAAAATGCTGCGGTCTCCTGTTTGATAAAAGAATATTGGCCAGTATTGCAGATTTTA	exon sense-overlapping	NM_003016	SRSF2	serine/arginine-rich splicing factor 2	-	74730196	74733493	4.46355	3.44671
ASHGA5P018343	0.0136226	0.0486619	2.02348	up	noncoding	NR_036608	SRSF2	RefSeq	2112	chr17	-	74730196	74733493	TAAGAAAATGCTGCGGTCTCCTGTTTGATAAAAGAATATTGGCCAGTATTGCAGATTTTA	natural antisense	NM_001242534	MFSD11	UNC93-like protein MFSD11 isoform 1	+	74732646	74775336	4.46355	3.44671
ASHGA5P015495	0.000167098	0.00454518	2.02201	up	noncoding	ENST00000420774	AC004540.5	GENCODE	496	chr7	+	26438271	26439274	TTGCATTCCCCGGCAGTCATTTTTATATGCGGAGAAACCCAACACACAGCTATTCTGTCA	intergenic							4.5615	3.54571
ASHGA5P023256	0.0285378	0.0744483	2.02174	up	noncoding	ENST00000576093	LINC00085	GENCODE	1894	chr19	+	52196592	52208443	TTTCTTAACGTCCTCGGGGCCCTCGCATCAGCGAGTGCGACAGTGTTGGCGTGGTGAGTT	intergenic							5.31748	4.30188
ASHGA5P032682	0.00016626	0.00454422	2.02154	up	noncoding	TCONS_00029178	XLOC_014118	LincRNAs identified by Cabili et al	340	chr21	-	45867205	45871219	GAGCATTTGCCTGGTGTAGACGTCCCCGTTTTCAGCGGTTATGCGTCCCTCTAGTTTCGG	intergenic							5.01476	3.9993
ASHGA5P025891	2.32183e-06	0.000411528	2.01998	up	noncoding	NR_045762	KLK2	RefSeq	2879	chr19	+	51376688	51383823	CCAGAGGAGTGAGTCTTCAGTGTGTGAGCCTCCATCTCCTGTCCAATGACATGTGTGCTA	exon sense-overlapping	NM_001002231	KLK2	kallikrein-2 isoform 2 preproprotein	+	51376688	51383823	4.69241	3.67807
ASHGA5P025891	2.32183e-06	0.000411528	2.01998	up	noncoding	NR_045762	KLK2	RefSeq	2879	chr19	+	51376688	51383823	CCAGAGGAGTGAGTCTTCAGTGTGTGAGCCTCCATCTCCTGTCCAATGACATGTGTGCTA	exon sense-overlapping	NM_001256080	KLK2	kallikrein-2 isoform 3	+	51376688	51383823	4.69241	3.67807
ASHGA5P025891	2.32183e-06	0.000411528	2.01998	up	noncoding	NR_045762	KLK2	RefSeq	2879	chr19	+	51376688	51383823	CCAGAGGAGTGAGTCTTCAGTGTGTGAGCCTCCATCTCCTGTCCAATGACATGTGTGCTA	exon sense-overlapping	NM_005551	KLK2	kallikrein-2 isoform 1 preproprotein	+	51376688	51383823	4.69241	3.67807
ASHGA5P053108	0.0477326	0.0996364	2.01995	up	noncoding	ENST00000415772	SBDSP1	pseudogene	733	chr7	+	72300068	72304585	CTGATCAAGGTCATAGAAAGTAAAGATTATGGCCAACAGTTAGAAATCGTAAGAGTCAAA								5.48126	4.46694
ASHGA5P031678	0.0403243	0.0900456	2.01819	up	noncoding	ENST00000570266	RP11-196G11.2	GENCODE	461	chr16	+	31054470	31061201	TAAGGAAGAGGGCAGACGGGGGAAGATTTTATAATTGTTCAAAAACATTCACTGGGATGT	intergenic							5.69506	4.682
ASHGA5P030263	0.00179573	0.0156506	2.01625	up	noncoding	ENST00000560522	AC068831.15	GENCODE	795	chr15	-	91463447	91464416	TAATAAGAAAGAGCCCTTGGGGACAGCAGCATACAGAGCACAGAAGCCAAAGAGAATTCA	natural antisense	NM_006122	MAN2A2	alpha-mannosidase 2x	+	91447419	91465815	4.8532	3.84153
ASHGA5P021317	8.70098e-05	0.00317122	2.01553	up	noncoding	NR_046374	MRVI1-AS1	RefSeq	910	chr11	+	10562782	10621479	TGTCTACAGTTCTACAGGTTTCTAGGCCCTTGGTGAGTGAAGAGCAGTTCATTACGAAAT	intronic antisense	NM_006691	LYVE1	lymphatic vessel endothelial hyaluronic acid receptor 1 precursor	-	10579412	10590365	5.85461	4.84345
ASHGA5P021317	8.70098e-05	0.00317122	2.01553	up	noncoding	NR_046374	MRVI1-AS1	RefSeq	910	chr11	+	10562782	10621479	TGTCTACAGTTCTACAGGTTTCTAGGCCCTTGGTGAGTGAAGAGCAGTTCATTACGAAAT	natural antisense	NM_001098579	MRVI1	protein MRVI1 isoform a	-	10594637	10673848	5.85461	4.84345
ASHGA5P021317	8.70098e-05	0.00317122	2.01553	up	noncoding	NR_046374	MRVI1-AS1	RefSeq	910	chr11	+	10562782	10621479	TGTCTACAGTTCTACAGGTTTCTAGGCCCTTGGTGAGTGAAGAGCAGTTCATTACGAAAT	natural antisense	NM_001100163	MRVI1	protein MRVI1 isoform b	-	10594637	10715535	5.85461	4.84345
ASHGA5P021317	8.70098e-05	0.00317122	2.01553	up	noncoding	NR_046374	MRVI1-AS1	RefSeq	910	chr11	+	10562782	10621479	TGTCTACAGTTCTACAGGTTTCTAGGCCCTTGGTGAGTGAAGAGCAGTTCATTACGAAAT	natural antisense	NM_001100167	MRVI1	protein MRVI1 isoform c	-	10594637	10715121	5.85461	4.84345
ASHGA5P021317	8.70098e-05	0.00317122	2.01553	up	noncoding	NR_046374	MRVI1-AS1	RefSeq	910	chr11	+	10562782	10621479	TGTCTACAGTTCTACAGGTTTCTAGGCCCTTGGTGAGTGAAGAGCAGTTCATTACGAAAT	natural antisense	NM_001206880	MRVI1	protein MRVI1 isoform e	-	10594637	10715535	5.85461	4.84345
ASHGA5P021317	8.70098e-05	0.00317122	2.01553	up	noncoding	NR_046374	MRVI1-AS1	RefSeq	910	chr11	+	10562782	10621479	TGTCTACAGTTCTACAGGTTTCTAGGCCCTTGGTGAGTGAAGAGCAGTTCATTACGAAAT	natural antisense	NM_001206881	MRVI1	protein MRVI1 isoform c	-	10594637	10715535	5.85461	4.84345
ASHGA5P021317	8.70098e-05	0.00317122	2.01553	up	noncoding	NR_046374	MRVI1-AS1	RefSeq	910	chr11	+	10562782	10621479	TGTCTACAGTTCTACAGGTTTCTAGGCCCTTGGTGAGTGAAGAGCAGTTCATTACGAAAT	natural antisense	NM_130385	MRVI1	protein MRVI1 isoform d	-	10594637	10715535	5.85461	4.84345
ASHGA5P021067	0.0118512	0.0448787	2.01445	up	noncoding	ENST00000524361	LINC00534	GENCODE	620	chr8	+	91233744	91581546	CCTGCTAAAGGCCACCAAGTTCTATTGAACATCATGAATCCTATGCTCAAGTGAGATCAG	intergenic							4.56112	3.55074
ASHGA5P045514	0.0151205	0.0521218	2.01391	up	noncoding	ENST00000415423	RP11-334J6.6	GENCODE	473	chr9	-	134391944	134397616	GCATCGGTTCCCTGTGAAAACATCTGTGACTTTATGTACGAATAAAACTTATGTAACTTT	natural antisense	NM_001077365	POMT1	protein O-mannosyl-transferase 1 isoform b	+	134378288	134399193	6.52179	5.51179
ASHGA5P045514	0.0151205	0.0521218	2.01391	up	noncoding	ENST00000415423	RP11-334J6.6	GENCODE	473	chr9	-	134391944	134397616	GCATCGGTTCCCTGTGAAAACATCTGTGACTTTATGTACGAATAAAACTTATGTAACTTT	natural antisense	NM_001077366	POMT1	protein O-mannosyl-transferase 1 isoform c	+	134378288	134399193	6.52179	5.51179
ASHGA5P045514	0.0151205	0.0521218	2.01391	up	noncoding	ENST00000415423	RP11-334J6.6	GENCODE	473	chr9	-	134391944	134397616	GCATCGGTTCCCTGTGAAAACATCTGTGACTTTATGTACGAATAAAACTTATGTAACTTT	natural antisense	NM_001136113	POMT1	protein O-mannosyl-transferase 1 isoform b	+	134378288	134399193	6.52179	5.51179
ASHGA5P045514	0.0151205	0.0521218	2.01391	up	noncoding	ENST00000415423	RP11-334J6.6	GENCODE	473	chr9	-	134391944	134397616	GCATCGGTTCCCTGTGAAAACATCTGTGACTTTATGTACGAATAAAACTTATGTAACTTT	natural antisense	NM_001136114	POMT1	protein O-mannosyl-transferase 1 isoform d	+	134378288	134399193	6.52179	5.51179
ASHGA5P045514	0.0151205	0.0521218	2.01391	up	noncoding	ENST00000415423	RP11-334J6.6	GENCODE	473	chr9	-	134391944	134397616	GCATCGGTTCCCTGTGAAAACATCTGTGACTTTATGTACGAATAAAACTTATGTAACTTT	natural antisense	NM_007171	POMT1	protein O-mannosyl-transferase 1 isoform a	+	134378288	134399193	6.52179	5.51179
ASHGA5P053707	0.0352824	0.08325	2.01365	up	noncoding	uc010mnq.2	AK311167	UCSC_knowngene	945	chr9	+	69065545	69106241	TGTGAAGTCTACCAAGCTTGTGCTCAAGGGAACCGAGGTGAAGAGCTGGGTCCTGCAGCT	intergenic							5.59858	4.58877
ASHGA5P050887	0.00718618	0.0333151	2.01281	up	noncoding	ENST00000456398	AC093642.5	GENCODE	1235	chr2	+	243030783	243082789	GAGAGGCGGTGGCCCACTTCCGGCAATAATCGCCTGGTCGCCGTCAGGTGCCGGCCCAGG	intergenic							4.76859	3.75938
ASHGA5P050162	0.000877454	0.0109817	2.01246	up	noncoding	ENST00000451090	RP11-145M4.2	GENCODE	317	chr1	-	59521670	59543788	CTAACACTAGGATGGACCTCTTGGCAATCTCTGGATATCTTTCTGTGGTTTGTTATAATG	intergenic							5.36775	4.35879
ASHGA5P035646	0.000184277	0.00478865	2.01056	up	noncoding	TCONS_00005054	XLOC_001934	LincRNAs identified by Cabili et al	386	chr2	-	740303	741130	CTACAACAGTACGTTTTGCCCACTGCCTTTCAGTCGTGATCAATTTTCTCCAGTTACTGG	intergenic							4.3233	3.31571
ASHGA5P019377	0.000171704	0.00462949	2.00929	up	noncoding	NR_023345	CNKSR1	RefSeq	2544	chr1	+	26503981	26516375	CCCCGGAAAGGTCTTGACGACTCCCTGCAGGACTATCCCTTTGAGGACTGGCAGCTGCCT	exon sense-overlapping	NM_006314	CNKSR1	connector enhancer of kinase suppressor of ras 1	+	26503980	26516375	4.34655	3.33986
ASHGA5P031402	0.0349905	0.0828151	2.00867	up	noncoding	ENST00000426575	RP11-318C24.2	GENCODE	657	chr1	-	175873897	175889649	CCTGGCTGTTCTGTTCATGACGGTGGTTATTCCAATTACTTTGAGAATTATATTTATTAG	intergenic							6.64498	5.63873
ASHGA5P042220	0.000339462	0.00660376	2.00865	up	noncoding	uc003mvi.1	AK096219	UCSC_knowngene	2108	chr6	+	3229005	3288894	CAGAGAGCTCGGTTCCCCGTCTCCACAAAACGAATCATTAAAATGGAAACTCACCATCTT	intron sense-overlapping	NM_001128591	PSMG4	proteasome assembly chaperone 4 isoform b	+	3259161	3268300	8.42145	7.41522
ASHGA5P042220	0.000339462	0.00660376	2.00865	up	noncoding	uc003mvi.1	AK096219	UCSC_knowngene	2108	chr6	+	3229005	3288894	CAGAGAGCTCGGTTCCCCGTCTCCACAAAACGAATCATTAAAATGGAAACTCACCATCTT	intron sense-overlapping	NM_001128592	PSMG4	proteasome assembly chaperone 4 isoform a	+	3259161	3268300	8.42145	7.41522
ASHGA5P042220	0.000339462	0.00660376	2.00865	up	noncoding	uc003mvi.1	AK096219	UCSC_knowngene	2108	chr6	+	3229005	3288894	CAGAGAGCTCGGTTCCCCGTCTCCACAAAACGAATCATTAAAATGGAAACTCACCATCTT	intron sense-overlapping	NM_001135750	PSMG4	proteasome assembly chaperone 4 isoform c	+	3259161	3264097	8.42145	7.41522
ASHGA5P042220	0.000339462	0.00660376	2.00865	up	noncoding	uc003mvi.1	AK096219	UCSC_knowngene	2108	chr6	+	3229005	3288894	CAGAGAGCTCGGTTCCCCGTCTCCACAAAACGAATCATTAAAATGGAAACTCACCATCTT	natural antisense	NM_015482	SLC22A23	solute carrier family 22 member 23 isoform a	-	3269206	3456793	8.42145	7.41522
ASHGA5P042220	0.000339462	0.00660376	2.00865	up	noncoding	uc003mvi.1	AK096219	UCSC_knowngene	2108	chr6	+	3229005	3288894	CAGAGAGCTCGGTTCCCCGTCTCCACAAAACGAATCATTAAAATGGAAACTCACCATCTT	natural antisense	NM_021945	SLC22A23	solute carrier family 22 member 23 isoform b	-	3269206	3445218	8.42145	7.41522
ASHGA5P033663	0.00122778	0.0129092	2.00808	up	noncoding	ENST00000577806	RP11-231E4.4	GENCODE	951	chr18	-	72260436	72264805	GGAGTGGCTCCTGTCGCTTCTGGCGCTCCGATTTCGAGAAATGACTTTCAGCTGTGCAAG	bidirectional	ENST00000582337	ZNF407	zinc finger protein 407 [Source:HGNC Symbol;Acc:19904]	+	72265105	72516583	5.12818	4.12236
ASHGA5P028151	4.2449e-05	0.0021158	2.00702	up	noncoding	ENST00000552367	RP11-290L1.3	GENCODE	569	chr12	+	76424273	76425158	AGGATGCAACACTTTTTCTTCCAGAGCTGCAACAACCCGTCGCTGCGCTTCTCCAGCACG	natural antisense	NM_007350	PHLDA1	pleckstrin homology-like domain family A member 1	-	76419226	76425556	4.85463	3.84957
ASHGA5P017470	0.0350882	0.0829943	2.00697	up	noncoding	ENST00000442049	RP11-403I13.4	GENCODE	454	chr1	+	149239893	149250552	AGAGATCCTTGTCAGAAAACTTGCCACAGAATCAACCCCAATGCTCACTAACAAACTGAG	intergenic							5.78754	4.78252
ASHGA5P030222	0.00573396	0.0294821	2.00688	up	noncoding	uc002blm.3	DQ596274	UCSC_knowngene	260	chr15	-	85747305	85747565	AGTACATATTGGCCAGCGGCTCCGAGATGATGAACTCCGGGGTCTGAGAGTGGGCAAACA	intergenic							4.71723	3.71227
ASHGA5P029091	0.0339567	0.0816254	2.00485	up	noncoding	ENST00000556013	PTCSC3	GENCODE	515	chr14	-	36605313	36645674	TTGCATCCCATTTCTACTCTGCCTGTGAGTGAAGACTGTTGTGGAAAAGTCAACTGGAGA	intergenic							6.03447	5.03097
ASHGA5P033380	0.00858546	0.0368903	2.00206	up	noncoding	NR_040017	RNF157-AS1	RefSeq	2177	chr17	+	74136636	74150729	GTCAGGAACACCCTTGTTAATAGTTTAGCTGATACTGTTTCTCTAAGGTGGAAGTAAAAA	natural antisense	NM_001454	FOXJ1	forkhead box protein J1	-	74132414	74137380	5.82132	4.81984
ASHGA5P033380	0.00858546	0.0368903	2.00206	up	noncoding	NR_040017	RNF157-AS1	RefSeq	2177	chr17	+	74136636	74150729	GTCAGGAACACCCTTGTTAATAGTTTAGCTGATACTGTTTCTCTAAGGTGGAAGTAAAAA	natural antisense	NM_052916	RNF157	RING finger protein 157	-	74138533	74236390	5.82132	4.81984
