# Supplementary material for: Age and poverty status alter the coding and noncoding transcriptome
Source: Aging (Albany NY). 2019 Feb 17;11(4):1189–203. doi: 10.18632/aging.101823 (PMC6402526; doi:10.18632/aging.101823)
Supplement: Supplementary Table 2 [file aging-11-101823-s003.xlsx]

## Sheet: Sheet1
Supplementary Table 2. lncRNAs significantly lower in abundance in young white males.
ProbeName	P-value	FDR	Fold Change	Regulation	type	seqname	GeneSymbol	source	RNAlength	chrom	strand	txStart	txEnd	Sequence	relationship	Associated_gene_acc	Associated_gene_name	Associated_protein_name	Associated_gene_strand	Associated_gene_start	Associated_gene_end	group-Y(normalized)	group-O(normalized)
ASHGA5P044929	1.93745e-06	0.000372192	37.3363	down	noncoding	ENST00000517655	KB-1047C11.2	GENCODE	562	chr8	+	96216683	96444894	ACTTTTGTTAGGTCCATTTTCACTTCATCAGAAATGTCCTGAGCTCTCCCTGGGCACTGT	intronic antisense	NM_177965	C8orf37	protein C8orf37	-	96257140	96281462	2.03565	7.25816
ASHGA5P056651	0.0161327	0.054193	31.532	down	noncoding	TCONS_00006917	XLOC_002730	LincRNAs identified by Cabili et al	308	chr3	+	96336526	96337039	CCTCTACCTATAAATCTTCCCACTAATTTCTATCGCCTATACTTTATTTGGGTAAATGGT	intergenic							7.578	12.5567
ASHGA5P038606	2.03037e-05	0.00139717	27.8536	down	noncoding	ENST00000577781	RP11-573D15.9	GENCODE	2400	chr3	-	186499568	186501968	ATCCACACCCACACTGCCTGTAACCTTACAGTGTATTCCTAATAAATGCAGTGATTACCA	natural antisense	NM_001967	EIF4A2	eukaryotic initiation factor 4A-II	+	186501360	186507685	5.07804	9.87783
ASHGA5P042638	0.00235503	0.017867	27.2431	down	noncoding	ENST00000425271	RP11-479J7.2	GENCODE	423	chr1	+	166304120	166304999	CCTTCCTTTTCTTTGAGGAAGTTCTCATTAACGATCATTCTCCTTATAATAGCCTGAATA	intergenic							3.74124	8.50906
ASHGA5P043660	0.00227537	0.0176461	26.5134	down	noncoding	TCONS_00018115	XLOC_008375	LincRNAs identified by Cabili et al	413	chr10	+	7115610	7118468	CCTTCCTTCACTATGTGCATACAACCTCCAGGAAAATAAAATAAAATAGTGTAAGAGTGA	intergenic							4.21143	8.94008
ASHGA5P030285	0.00137892	0.0136472	22.5531	down	noncoding	NR_034095	LOC400456	RefSeq	1445	chr15	-	95822518	95870329	CCAGTCCTCCATTCCATTCCCTAATTTGTATGCAATGGCATTTAACATTTTGACTTTGCT	intergenic							8.66126	13.1565
ASHGA5P048159	0.000618112	0.00928276	22.3934	down	noncoding	TCONS_00017457	XLOC_008058	LincRNAs identified by Cabili et al	548	chrX	+	119125486	119126833	AGTGTAAATAAAGTTCCATTCCTTCTAACAATGGTATCCTTTAGAGAACACTTCTGTGTG	intergenic							3.72723	8.21223
ASHGA5P039362	0.00229047	0.0177041	21.3155	down	noncoding	NR_002813	KCNIP4-IT1	RefSeq	9848	chr4	-	21844963	21854811	GTAATTGTCGTATTCTTTCTTTCTCTTTCCAGCTATTTCTGGTAGTCATGTCAAGTTGAG	intron sense-overlapping	NM_147182	KCNIP4	Kv channel-interacting protein 4 isoform 3	-	20730238	21950374	2.75755	7.17138
ASHGA5P035205	0.000716055	0.00995678	21.0583	down	noncoding	ENST00000454183	AC018730.4	GENCODE	327	chr2	-	105481864	105483954	TCCATCTCAATGTCCATTCCATTATTTTGTAGCTACAATAAAGAAACATGGGCAGCAGTG	intergenic							5.51933	9.91565
ASHGA5P056778	0.00145895	0.0140079	20.9559	down	noncoding	TCONS_00008575	XLOC_004069	LincRNAs identified by Cabili et al	295	chr4	-	128540064	128545185	TAAGGGACAGCTTCGCTTAATCTTTCTTTCTCTTCTTCCTAAGCCATGTGAAGACCTTGC	intronic antisense	ENST00000504491	INTU	inturned planar cell polarity effector homolog (Drosophila) [Source:HGNC Symbol;Acc:29239]	+	128544425	128565191	2.86417	7.25345
ASHGA5P000205	0.00221092	0.0173534	18.2759	down	noncoding	chr10:7584675-7594825-	chr10:7584675-7594825	LincRNAs identified by Khalil et al	10150	chr10	-	7544669	7554819	TATTTCTTTCTTCCTTTCTGTGACAACGGACAAGTTGCCCTTATCCCTCTGAGGAAGCTG	intergenic							3.44793	7.6398
ASHGA5P056650	0.00822425	0.0359923	18.0304	down	noncoding	TCONS_00006916	XLOC_002730	LincRNAs identified by Cabili et al	618	chr3	+	96336044	96336983	GGGTTAACAGTGAGGGTAATAATGGCTTGTTGGTTGATTGTAGATATTGGGTAAATTTAA	intergenic							4.76295	8.9353
ASHGA5P037751	0.00028405	0.00599861	17.923	down	noncoding	TCONS_00024847	XLOC_011730	LincRNAs identified by Cabili et al	337	chr16	+	54881150	54888858	AACCAACCATTCCATCCGTATGAAGAGCGTAAGTCCTAGATTTGCGTCGTGATGTCATCT	intergenic							4.51265	8.67638
ASHGA5P052048	0.00205395	0.0167221	17.5807	down	noncoding	NR_024237	LOC100132111	RefSeq	761	chr1	+	151810944	151816641	TGGAATGTATTTCCTTCCTTCTGGGAGTGTTTGAATGAAGATTAGACTCTCCTTGACCAT	natural antisense	NM_001136003	C2CD4D	C2 calcium-dependent domain-containing protein 4D	-	151810338	151813033	3.03935	7.17527
ASHGA5P056960	0.00223454	0.017432	17.4878	down	noncoding	TCONS_00011248	XLOC_005939	LincRNAs identified by Cabili et al	4156	chr6	-	169819100	169825251	GGAATTCTTTTCCTTTCTTTCCCTAACGAAGGAGATATAAGTGACAGCCACCTGGTGGTC	intergenic							2.67844	6.80672
ASHGA5P054507	0.00197227	0.016431	17.3497	down	noncoding	ENST00000480805	MBL1P	GENCODE	1424	chr10	+	81679933	81682875	ATGAAATTCCCTTCCTTCACTTTCTTCACCTCAAGGTAAGGACCATGTTCCTGTTTCCAT	intergenic							5.92633	10.0432
ASHGA5P023689	0.00247956	0.0183205	16.7231	down	noncoding	HMlincRNA152-	HMlincRNA152	LincRNAs identified by Khalil et al	10779	chr6	-	132581948	132592727	TGTGTGTGTGTGAGACTGTGCATGCATGTGTGTGTCCTCATTAGAGGAAAAACAGAAACT	intergenic							6.70816	10.7719
ASHGA5P046178	5.02918e-06	0.000642571	16.3551	down	noncoding	TCONS_00001451	XLOC_000781	LincRNAs identified by Cabili et al	305	chr1	-	35081179	35083207	ATAAAGAAGGACAGAGAGTTGAAAGATTGCTTAATGCAGGGTGGCAGGGGCTGAAGCATT	intergenic							2.66468	6.69634
ASHGA5P045427	0.00212644	0.0170355	16.3384	down	noncoding	ENST00000449730	RP11-281A20.1	GENCODE	625	chr9	-	120602599	120659534	TCTTCTTTCTTTCCTATTGTTCATAAACATGGTATTAAAATGACCACTAAAGAGCAGAAA	intergenic							1.81049	5.84069
ASHGA5P049335	0.00125692	0.013111	16.3139	down	noncoding	ENST00000568776	RP11-525K10.3	GENCODE	1470	chr16	-	80188949	80597032	TATACATAAATATGCGTGTGTGTGTGTATGTATGTTTCGATGTATATGAACCCATGATCT	intronic antisense	NM_130897	DYNLRB2	dynein light chain roadblock-type 2	+	80574853	80584541	5.96731	9.99534
ASHGA5P029046	0.00119442	0.0126886	16.2841	down	noncoding	TCONS_00010340	XLOC_004829	LincRNAs identified by Cabili et al	1165	chr5	-	55745620	55749277	GAGTGTGTGTGTGTATTTATATTGTTGAGCAGGGATAAAAATATCAGAGGAATATGTACC	intergenic							6.74604	10.7714
ASHGA5P031668	0.000514883	0.00821408	15.755	down	noncoding	ENST00000563540	RP11-146F11.5	GENCODE	482	chr16	+	30597227	30619914	CTTCCTTCTGCTACTGAGGTGAGAAGTCTTAGGGCAGATGCGGATGTCCAGGGCTTCGAG	intronic antisense	NM_138447	ZNF689	zinc finger protein 689	-	30614699	30621682	2.17102	6.14875
ASHGA5P032845	0.00159369	0.0146514	15.7476	down	noncoding	ENST00000585303	CTC-297N7.7	GENCODE	566	chr17	+	10515224	10526172	GTGTGTGTGTAGCTTTGAAAATACAAAGTATTGGGAATAGGAACTGTGATACAAACAAAG	intergenic							5.4073	9.38436
ASHGA5P016839	0.000816017	0.0106579	15.4437	down	noncoding	ENST00000434879	RP4-655J12.4	GENCODE	436	chr1	-	116995656	117021448	AAGGGACCCTTATGTGTCTCCAGAAGCCTTCCTTTCCATTCCTGTGGGGTCTGACAGTTG	intergenic							6.17192	10.1209
ASHGA5P054733	0.000528103	0.00837438	15.057	down	noncoding	ENST00000526388	CTC-497E21.4	GENCODE	607	chr11	-	13002215	13011085	GCAGGCTGTTCCATTCCACCATTCTGTCTGGCCCACTGCTTCTTACAAGATTAAGATAGC	intergenic							7.4647	11.3771
ASHGA5P054885	0.00143305	0.0138804	14.7536	down	noncoding	ENST00000492786	RPLP0P2	GENCODE	573	chr11	+	61396332	61403994	TGTGTGTGTCAGTGTGTGTGGGTGTGATTGTGTGAGCAACTGGGTGTGTGAGGTTCAGGC	intergenic							7.81448	11.6975
ASHGA5P037139	0.00457687	0.0259872	14.6028	down	noncoding	uc002xzq.1	BC007940	UCSC_knowngene	1617	chr20	+	57329405	57331891	CCTTCCTCTTCCTGTCTGTTTTAAGCAGTTGTGGCTTTGCCAAAAATAAAAATAATTTCT	intergenic							6.01004	9.87821
ASHGA5P026521	0.000113361	0.00366025	14.2634	down	noncoding	ENST00000534505	RP11-770G2.2	GENCODE	464	chr11	+	65513199	65539056	CAAAATATTGTCTTCCCATTCCATTGAAGGTTCAGAGGCCTCAGTGTCCAAGGGAGAATG	intergenic							2.7071	6.54135
ASHGA5P036386	0.00297673	0.0203322	13.7165	down	noncoding	ENST00000435643	AC007879.1	GENCODE	554	chr2	+	208038357	208087514	CTTCCTTCTAACTCAGGTGATCTATTGCTTAACAAAAATTCACCTACCATCATGATAAAG	intergenic							2.57895	6.35678
ASHGA5P030417	0.000132859	0.00402473	13.4237	down	noncoding	uc001zfu.3	DQ786280	UCSC_knowngene	830	chr15	+	32449483	32450313	ATCCACTCCATTTCTAAAAGCAAGTTGAACAGCAAATTTCAGTTGATGGGAACCTATATT	exon sense-overlapping	NM_000746	CHRNA7	neuronal acetylcholine receptor subunit alpha-7 isoform 1 precursor	+	32322685	32462384	5.24293	8.98964
ASHGA5P030417	0.000132859	0.00402473	13.4237	down	noncoding	uc001zfu.3	DQ786280	UCSC_knowngene	830	chr15	+	32449483	32450313	ATCCACTCCATTTCTAAAAGCAAGTTGAACAGCAAATTTCAGTTGATGGGAACCTATATT	exon sense-overlapping	NM_001190455	CHRNA7	neuronal acetylcholine receptor subunit alpha-7 isoform 2 precursor	+	32322685	32462384	5.24293	8.98964
ASHGA5P031365	0.00246788	0.0182946	13.3897	down	noncoding	ENST00000568458	RP11-558A11.3	GENCODE	469	chr16	-	84376069	84377013	AGTCCCAAAAGCCTTGCTTCCTTCCTTTCTCCTGGATAACCCACCTCTGCCTGCCACAGA	intergenic							6.73879	10.4818
ASHGA5P000414	2.45462e-06	0.000411528	12.8917	down	noncoding	chr4:114929225-114940000+	chr4:114929225-114940000	LincRNAs identified by Khalil et al	10775	chr4	+	114709776	114720551	GAAATGTTTTGGGCCAAAATACCATCACCACTGTTGTTTGAATAACAATTTAAATGGCCT	intergenic							1.94534	5.63371
ASHGA5P052425	0.00145989	0.0140079	12.7724	down	noncoding	uc003lfh.1	AX748200	UCSC_knowngene	2096	chr5	-	139624646	139626742	TTTGTCTGTCTCTCATATTGCAGCAGAAAAAGTCCTACCTGGAGCGAAGCGTTAAGGAAG	exon sense-overlapping	NM_002622	PFDN1	prefoldin subunit 1	-	139624634	139682689	3.66023	7.33519
ASHGA5P057400	0.00528009	0.0282844	12.6629	down	noncoding	TCONS_00016773	XLOC_007703	LincRNAs identified by Cabili et al	262	chr9	-	65734492	65782030	TCTCTCTTCTTCAATAGCTGCTTACGAAATAAAAACATCAGTAGGAGGGGAAGGAGGAAG	intergenic							3.37855	7.04108
ASHGA5P045862	0.00294186	0.0202333	12.5643	down	noncoding	TCONS_00001675	XLOC_001013	LincRNAs identified by Cabili et al	345	chr1	-	149993002	149998813	TAGGGGTGTGTGTGTTTTGAGAGAAAGAAATAGAAAAGGGCCAATGTATTTGCTATTAAA	intergenic							4.17947	7.83073
ASHGA5P058878	0.000501603	0.00821408	12.3546	down	noncoding	uc.254+	uc.254	UCR	279	chr9	+	23496724	23497003	ATTGAAGCCTCTGAACAAAGAAAATCATTTCCATTCCATCACTATGGTTACACTTTCTTC	intergenic							5.20854	8.83552
ASHGA5P044904	0.00214678	0.0171045	12.2539	down	noncoding	ENST00000534675	RP11-354A14.1	GENCODE	466	chr8	+	82797611	82835428	TCCTCTCTTCTTCTTTGTGTTTTTCACCCTGAAGTGTACAAAGTCAAATGAATTTCCTAG	intergenic							3.08221	6.69738
ASHGA5P046964	0.000202772	0.00499936	12.2014	down	noncoding	ENST00000445306	RP11-119F19.2	GENCODE	2221	chr10	-	81524485	81546199	CACCACCAAGAAATCATCACCATTAATATTTTGGCTTTTTTGTTTTCAGATTTTTTCCAT	intergenic							3.78392	7.3929
ASHGA5P055039	0.000465076	0.00783729	12.0584	down	noncoding	ENST00000526984	RP11-672A2.2	GENCODE	573	chr11	-	76414317	76415523	TGTATAAGGTGAGAATACCAGGAGGCTGGCATTCCATTCCTCCCTTTACTACTGTGCCTT	intergenic							6.19876	9.79073
ASHGA5P038099	0.00133559	0.0136076	11.6468	down	noncoding	AL038759		LincRNAs identified by Khalil et al	611	chr13	-	46513359	46513975	CTTCAAATCTTCTATCTTACACCAATACCTTCCTTCTTTCACATTAAAAATTCTGCTTCC	intergenic							3.88884	7.43071
ASHGA5P036477	0.00188772	0.0159841	11.6354	down	noncoding	uc002vms.1	AX747413	UCSC_knowngene	1949	chr2	+	222437225	222439174	GGGGATATATGTATGTGTGTGTGCGTGCATAAATTATTTAAAATAACTGCACTAAATCCC	natural antisense	ENST00000409938	EPHA4	EPH receptor A4 [Source:HGNC Symbol;Acc:3388]	-	222290620	222438922	4.94403	8.48448
ASHGA5P036477	0.00188772	0.0159841	11.6354	down	noncoding	uc002vms.1	AX747413	UCSC_knowngene	1949	chr2	+	222437225	222439174	GGGGATATATGTATGTGTGTGTGCGTGCATAAATTATTTAAAATAACTGCACTAAATCCC	natural antisense	ENST00000434266	EPHA4	EPH receptor A4 [Source:HGNC Symbol;Acc:3388]	-	222428998	222438878	4.94403	8.48448
ASHGA5P044219	0.00100348	0.0115948	11.5758	down	noncoding	uc003xng.4	ADAM3A	UCSC_knowngene	1281	chr8	-	39346405	39380470	CACACTGTTTTTCTGGTTCATAGTTATCTTGGGTATTTTGGGCCCTTTGAATTTTATTGT	intergenic							3.75004	7.28307
ASHGA5P037394	0.00217954	0.0172363	11.436	down	noncoding	ENST00000435697	LINC00478	GENCODE	716	chr21	+	17791751	17860215	CATCAGGAAGGCAATTCTGTGTGCATGTGTGTGTGTATATATATAGTTAGAAGTTAGAAA	intergenic							5.101	8.61651
ASHGA5P046076	5.42844e-06	0.000676428	11.4169	down	noncoding	uc022bqw.1	cytochrome b	UCSC_knowngene	1032	chrM	+	14856	15888	CAATCCTAATCCTAATACCAACTATCTCCCTAATTGAAAACAAAATACTCAAATGGGCCT	intergenic							11.189	14.7021
ASHGA5P031261	0.00226526	0.0176121	11.3599	down	noncoding	TCONS_00006165	XLOC_002770	LincRNAs identified by Cabili et al	833	chr3	+	116958057	116963238	CTCCTTCCTCATGCATACCTTAAGCATTAATTTAAGGTCAAGCACATTTACAGGTTCCCC	intronic antisense	ENST00000539563	LSAMP	limbic system-associated membrane protein [Source:HGNC Symbol;Acc:6705]	-	115529163	117716095	3.76508	7.27097
ASHGA5P039244	0.00175879	0.0154455	11.2638	down	noncoding	uc003fua.2	FLJ34208	UCSC_knowngene	2711	chr3	+	194207868	194239008	TTCCTCCACTTCCTAATCCCTTCATTATAATTCCTTCCACAACAGAATAAGTTTCTTGAG	natural antisense	ENST00000439040	ATP13A3	ATPase type 13A3 [Source:HGNC Symbol;Acc:24113]	-	194123400	194219093	5.09621	8.58983
ASHGA5P047574	0.00728499	0.033496	11.2422	down	noncoding	uc001kfc.1	AK130076	UCSC_knowngene	1770	chr10	+	89706924	89708694	CAGGGGTGTGTGTGTGTAGTTAAAGATCAATTTAACTTAAAAGGTCTTGGTTAGAGAATA	intron sense-overlapping	NM_000314	PTEN	phosphatidylinositol 3,4,5-trisphosphate 3-phosphatase and dual-specificity protein phosphatase PTEN	+	89623194	89728532	6.66537	10.1562
ASHGA5P058660	3.77924e-05	0.00192532	11.0976	down	noncoding	uc.47-	uc.47	UCR	227	chr2	-	7774650	7774877	AATCCAAAATTTCAAAGTGTGATGGATGTCAGCTCCCGATTTGGTGTGTGTGAGGTCACC	intergenic							1.96524	5.43742
ASHGA5P041505	0.00467069	0.0262933	10.837	down	noncoding	ENST00000523301	RP11-175K6.1	GENCODE	568	chr5	+	158527629	158534225	ATTATTTCCCTTTCTCTCTCTTCAATGTTCCCTTATCCTGAGTATTGAGGTCCCCAAACG	bidirectional	NM_024007	EBF1	transcription factor COE1	-	158122922	158526788	5.15005	8.58795
ASHGA5P027927	0.00610484	0.0304944	10.7078	down	noncoding	TCONS_00012060	XLOC_005590	LincRNAs identified by Cabili et al	232	chr6	-	4399912	4401474	ATTTTTGCCAATTCCCTTCCTTTCCTTCTTCTTTCCTATGAAGGGGGAAGAGGCTGGCAT	intergenic							7.90524	11.3258
ASHGA5P036169	0.00401989	0.0242271	10.6296	down	noncoding	ENST00000446492	AC093391.2	GENCODE	488	chr2	+	136743043	136756701	GAGGGTGTGTGTGGTATTCTACATTCAGTAGGGATTTATAAATGAGGATGATATCACTCA	natural antisense	NM_001349	DARS	aspartate--tRNA ligase, cytoplasmic	-	136664253	136743222	4.01677	7.42678
ASHGA5P016721	0.00380506	0.0234582	10.611	down	noncoding	ENST00000433442	RP11-162J8.3	GENCODE	130	chr6	-	149348835	149353709	CAGGCAGTGACTGGTGTGTGTGTGTGTGTTATGAAGAGAGAGGGATGGAAATTGTGACCA	intronic antisense	NM_005715	UST	uronyl 2-sulfotransferase	+	149068270	149398126	8.52364	11.9311
ASHGA5P027640	0.00150726	0.0142841	10.4866	down	noncoding	ENST00000539163	HNF1A-AS1	GENCODE	2455	chr12	-	121407640	121410095	TCACATCATGGAAACAGACCATCAGATTTGGTGTGTGTGTGTTTTATTTTGCTTTTTCAG	intergenic							3.94188	7.33236
ASHGA5P052490	0.000384479	0.00696518	10.4463	down	noncoding	ENST00000521666	RP11-80G7.1	GENCODE	800	chr5	-	162910070	162921040	CACTCAGGTTCTAATCATAGATTACCTTCCTTCTTCATCTTCCAGCTGTTTTCTAAAGTC	natural antisense	NM_001142556	HMMR	hyaluronan mediated motility receptor isoform a	+	162887516	162918953	3.71937	7.10429
ASHGA5P052490	0.000384479	0.00696518	10.4463	down	noncoding	ENST00000521666	RP11-80G7.1	GENCODE	800	chr5	-	162910070	162921040	CACTCAGGTTCTAATCATAGATTACCTTCCTTCTTCATCTTCCAGCTGTTTTCTAAAGTC	natural antisense	NM_001142557	HMMR	hyaluronan mediated motility receptor isoform d	+	162887516	162918953	3.71937	7.10429
ASHGA5P052490	0.000384479	0.00696518	10.4463	down	noncoding	ENST00000521666	RP11-80G7.1	GENCODE	800	chr5	-	162910070	162921040	CACTCAGGTTCTAATCATAGATTACCTTCCTTCTTCATCTTCCAGCTGTTTTCTAAAGTC	natural antisense	NM_012484	HMMR	hyaluronan mediated motility receptor isoform b	+	162887516	162918953	3.71937	7.10429
ASHGA5P052490	0.000384479	0.00696518	10.4463	down	noncoding	ENST00000521666	RP11-80G7.1	GENCODE	800	chr5	-	162910070	162921040	CACTCAGGTTCTAATCATAGATTACCTTCCTTCTTCATCTTCCAGCTGTTTTCTAAAGTC	natural antisense	NM_012485	HMMR	hyaluronan mediated motility receptor isoform c	+	162887516	162918953	3.71937	7.10429
ASHGA5P056754	0.000555548	0.00862409	10.4291	down	noncoding	TCONS_00008385	XLOC_003839	LincRNAs identified by Cabili et al	252	chr4	+	190197915	190198838	ATATGTGACAGGCTCTCATAGTCACCATCATCACGGGAATCTTGCACATGTTACAGGGAA	intergenic							4.18157	7.56411
ASHGA5P043539	0.00468708	0.0263534	10.4278	down	noncoding	ENST00000452700	AC003986.5	GENCODE	1526	chr7	+	19183915	19185876	TTCCTTTCCCTACCTTTACCTCCTACTCATATAAAATAGAGGATTTTATTCCAAGAGGAA	natural antisense	NM_152898	FERD3L	fer3-like protein	-	19184404	19185044	4.92127	8.30363
ASHGA5P031073	0.00354683	0.0224934	10.2395	down	noncoding	ENST00000567795	CTD-2574D22.4	GENCODE	2270	chr16	-	29930956	29933226	GAGTATGTGTGTGTGTGTGTATTTGCTTGCCAAAATACAATCGTGTTGTATGAAATGTTT	intron sense-overlapping	NM_178863	KCTD13	BTB/POZ domain-containing adapter for CUL3-mediated RhoA degradation protein 1	-	29917656	29937545	8.09029	11.4464
ASHGA5P058168	0.00156326	0.0144834	10.1508	down	noncoding	TCONS_00027248	XLOC_013278	LincRNAs identified by Cabili et al	1258	chr19	-	23708437	23748325	ATGTGATGTGAGTCTCCTTCCTGACCCTTCCTGCAAGGATCTGTGGGACAGACCCAGCAG	intergenic							5.23402	8.57754
ASHGA5P000010	6.94387e-05	0.00279604	10.1248	down	noncoding	AF070625		NRED	1728	chr13	-	110637212	110638912	GACCATTCCAGTATCCTTACCTTACAGAAATGACAGCAACAACAGCAAATATGAGTAAAG	intergenic							2.20734	5.54716
ASHGA5P032282	0.00617468	0.0306936	10.0486	down	noncoding	ENST00000583179	RP11-19P22.5	GENCODE	2110	chr17	-	25988574	25990684	CTGTTCCACTTCCTCTCCTTCCTCATTGAACTCTTTCACTAAAAGGAGAGTGCAAGAGAG	intergenic							7.3305	10.6594
ASHGA5P035864	0.000581204	0.00893214	10.0127	down	noncoding	ENST00000409590	AC007131.1	GENCODE	2036	chr2	+	59444842	59506535	CCTAATGTGTTAAATGAAGATAATGCCTATCTCACTGTTTTGTGTGTGTGTGTGTGAAAA	intergenic							4.82975	8.15352
ASHGA5P049823	0.00587126	0.0298051	10.0027	down	noncoding	ENST00000420427	AC004562.1	GENCODE	665	chr17	+	67957902	67979679	TTTTCTTCCTTCCATGATATAGATATATTGATCATGAGGAGAGGGCTCACCCCTCACCCG	intergenic							4.7377	8.06002
ASHGA5P026358	0.000430098	0.00752243	9.92154	down	noncoding	DB224754		LincRNAs identified by Khalil et al	566	chr1	+	39028316	39028882	ATGGCGCGTCAAGGTCCATCCATTCCTTTGCAGCATAATCTACACATCATTCAAGTGCAT	intergenic							4.75961	8.07018
ASHGA5P039732	0.00409579	0.0244679	9.8959	down	noncoding	TCONS_00023008	XLOC_010856	LincRNAs identified by Cabili et al	358	chr14	+	66592482	66593873	CCTTCTTCCCCTCTCTTCATGTTCACAGCATATCTTATTATTGTTAATATTGGAAGTCAA	intergenic							6.71827	10.0251
ASHGA5P055489	0.00418412	0.0247319	9.89324	down	noncoding	TCONS_00029007	XLOC_013931	LincRNAs identified by Cabili et al	1493	chr21	+	37477279	37481023	TGTGTGTGTGCATGAATGATCACAAATAACCCTACCTGCGGTGTTGTTCATGTGGATGGT	intergenic							4.4532	7.75964
ASHGA5P027855	0.000588008	0.00898177	9.81697	down	noncoding	ENST00000542689	RP11-508P1.2	GENCODE	605	chr12	+	15154766	15159617	ACCCACTCCACTTCCTAGGAAATGCCTAGAAATAGAAGGAACTCAGTAAATACTTCCTGG	intergenic							6.30026	9.59554
ASHGA5P028976	0.00253699	0.0185685	9.78567	down	noncoding	uc001vvr.1	AK022914	UCSC_knowngene	4651	chr14	-	19880208	19925333	AAGAAAAACTACTTGCTGCCCTTACTTGAAGCTCAATTATTTAAAACAAAGAAAAAATAG	intergenic							4.10131	7.39198
ASHGA5P052148	0.0304185	0.0770151	9.77492	down	noncoding	ENST00000507869	AC108142.1	GENCODE	2129	chr4	-	182896308	183006289	CTTCCTCTTCCTCTTTCTTTATGGATGGCAAACAGCGTTCAGATGACAGATTTTGGAAAA	intergenic							6.73784	10.0269
ASHGA5P032222	0.00862713	0.0369832	9.70659	down	noncoding	ENST00000456090	SMCR2	GENCODE	564	chr17	-	17577339	17581002	AGAGACCCTTGGGCTTCCTTCCTTCAAGGCCTCTGGTCTCTAGCAGAGAGAAGAGAGGGA	intergenic							5.75436	9.03332
ASHGA5P048985	0.00331501	0.0215482	9.70008	down	noncoding	ENST00000566287	LA16c-390E6.5	GENCODE	1124	chr16	+	1495343	1496520	CACACACACACAGCTGATCCCTGGAGGTAAAGAAACCTAGACGAGGAGAGTGGAGGCTGG	natural antisense	NM_001114331	CLCN7	H(+)/Cl(-) exchange transporter 7 isoform b	-	1494933	1525085	5.85443	9.13243
ASHGA5P048985	0.00331501	0.0215482	9.70008	down	noncoding	ENST00000566287	LA16c-390E6.5	GENCODE	1124	chr16	+	1495343	1496520	CACACACACACAGCTGATCCCTGGAGGTAAAGAAACCTAGACGAGGAGAGTGGAGGCTGG	natural antisense	NM_001287	CLCN7	H(+)/Cl(-) exchange transporter 7 isoform a	-	1494933	1525085	5.85443	9.13243
ASHGA5P036029	0.00203903	0.0166893	9.67204	down	noncoding	ENST00000453878	AC108051.3	GENCODE	478	chr2	+	103628236	103636356	CAAGCCAGCCACTAAATTCAGGACTGAAGCAAAGGATTAATGCATTTTTCAGACTATTAG	intergenic							4.34131	7.61513
ASHGA5P058806	0.00320249	0.0212448	9.61481	down	noncoding	uc.115-	uc.115	UCR	219	chr3	-	19034157	19034376	CCCTCCTTCTCTGAGTTCAGCAACTAATTATATTTTTAAATAATGGCTACCATTGAACAC	intergenic							5.13676	8.40202
ASHGA5P051396	0.00736955	0.0336715	9.59186	down	noncoding	NR_037807	IL17RC	RefSeq	2618	chr3	+	9958757	9975305	CAACCTCCTTCCTTTATTTGTTCCACAGACTGGACCGCAGATCATTACCTTGAACCACAC	exon sense-overlapping	NM_001203263	IL17RC	interleukin-17 receptor C isoform 4 precursor	+	9958757	9975305	4.85188	8.11369
ASHGA5P051396	0.00736955	0.0336715	9.59186	down	noncoding	NR_037807	IL17RC	RefSeq	2618	chr3	+	9958757	9975305	CAACCTCCTTCCTTTATTTGTTCCACAGACTGGACCGCAGATCATTACCTTGAACCACAC	exon sense-overlapping	NM_001203264	IL17RC	interleukin-17 receptor C isoform 5 precursor	+	9958757	9975305	4.85188	8.11369
ASHGA5P051396	0.00736955	0.0336715	9.59186	down	noncoding	NR_037807	IL17RC	RefSeq	2618	chr3	+	9958757	9975305	CAACCTCCTTCCTTTATTTGTTCCACAGACTGGACCGCAGATCATTACCTTGAACCACAC	exon sense-overlapping	NM_001203265	IL17RC	interleukin-17 receptor C isoform 6 precursor	+	9958757	9975305	4.85188	8.11369
ASHGA5P051396	0.00736955	0.0336715	9.59186	down	noncoding	NR_037807	IL17RC	RefSeq	2618	chr3	+	9958757	9975305	CAACCTCCTTCCTTTATTTGTTCCACAGACTGGACCGCAGATCATTACCTTGAACCACAC	exon sense-overlapping	NM_032732	IL17RC	interleukin-17 receptor C isoform 3 precursor	+	9958757	9975305	4.85188	8.11369
ASHGA5P051396	0.00736955	0.0336715	9.59186	down	noncoding	NR_037807	IL17RC	RefSeq	2618	chr3	+	9958757	9975305	CAACCTCCTTCCTTTATTTGTTCCACAGACTGGACCGCAGATCATTACCTTGAACCACAC	exon sense-overlapping	NM_153460	IL17RC	interleukin-17 receptor C isoform 1 precursor	+	9958757	9975305	4.85188	8.11369
ASHGA5P051396	0.00736955	0.0336715	9.59186	down	noncoding	NR_037807	IL17RC	RefSeq	2618	chr3	+	9958757	9975305	CAACCTCCTTCCTTTATTTGTTCCACAGACTGGACCGCAGATCATTACCTTGAACCACAC	exon sense-overlapping	NM_153461	IL17RC	interleukin-17 receptor C isoform 2 precursor	+	9958781	9975305	4.85188	8.11369
ASHGA5P019641	0.000260824	0.00572633	9.56727	down	noncoding	NR_052005	CD274	RefSeq	3518	chr9	+	5450502	5470567	GACTCACTTGGGAGAATGATGGATGTGAAAAAATGTGGCATCCAAGATACAAACTCAAAG	exon sense-overlapping	NM_001267706	CD274	programmed cell death 1 ligand 1 isoform b precursor	+	5450502	5470567	3.14506	6.40317
ASHGA5P019641	0.000260824	0.00572633	9.56727	down	noncoding	NR_052005	CD274	RefSeq	3518	chr9	+	5450502	5470567	GACTCACTTGGGAGAATGATGGATGTGAAAAAATGTGGCATCCAAGATACAAACTCAAAG	exon sense-overlapping	NM_014143	CD274	programmed cell death 1 ligand 1 isoform a precursor	+	5450502	5470567	3.14506	6.40317
ASHGA5P057372	0.00482327	0.026728	9.56357	down	noncoding	TCONS_00016406	XLOC_007777	LincRNAs identified by Cabili et al	698	chr9	-	94246564	94249578	TTTCTCTCTCTCTGATCCAAAATGACTGCTGCATCAGTAAACACTTGGGAGTGAAGCAGG	intergenic							6.21657	9.47412
ASHGA5P026738	0.00123471	0.0129672	9.43438	down	noncoding	AK309032R		LincRNAs identified by Khalil et al	1152	chr1	-	87678351	87717014	ACTTCCAAGGGACCTCTTCTCAAGGTTTTCAGCTCCAATTTCTGAACCAGCTACCTTTGT	intergenic							2.56288	5.80081
ASHGA5P039540	0.00233237	0.0178036	9.24237	down	noncoding	ENST00000506795	RPL34-AS1	GENCODE	1136	chr4	-	109461323	109541585	CCATTCCAGTCCTTTTCAAATCCAAGACTGAAATGAATTTTTCTAGCTATTTATCCCATC	bidirectional	NM_000995	RPL34	60S ribosomal protein L34	+	109541721	109551639	6.73733	9.94559
ASHGA5P039540	0.00233237	0.0178036	9.24237	down	noncoding	ENST00000506795	RPL34-AS1	GENCODE	1136	chr4	-	109461323	109541585	CCATTCCAGTCCTTTTCAAATCCAAGACTGAAATGAATTTTTCTAGCTATTTATCCCATC	bidirectional	NM_033625	RPL34	60S ribosomal protein L34	+	109541748	109551639	6.73733	9.94559
ASHGA5P016893	0.00444907	0.0255291	9.21986	down	noncoding	ENST00000435444	RP11-29B9.2	GENCODE	501	chr9	-	7960412	7961080	ATAAAATACTATGACCCTTCCTTCCAGAAGAACAATGCGCTGTGATCTTTGGCTACTCAA	intergenic							6.41628	9.62103
ASHGA5P038324	0.00187875	0.0159374	9.07774	down	noncoding	ENST00000491849	RP11-735B13.1	GENCODE	452	chr3	-	84917278	84930830	GCATAAGACCCATGAAGATTACAGACACATACACTCCTAAAATTAAACATTAAGCGGAAT	intergenic							2.53171	5.71404
ASHGA5P057174	0.00113825	0.0123771	9.07374	down	noncoding	TCONS_00014042	XLOC_005955	LincRNAs identified by Cabili et al	849	chr7	+	389823	391347	ACACACACACACACAAGACACGACTTCACACAACGTCCAAAACTCATGCTCACACACATC	intergenic							8.95497	12.1367
ASHGA5P038729	0.0068239	0.0324346	9.01378	down	noncoding	ENST00000414382	AC098973.2	GENCODE	543	chr3	+	27862978	27932792	GTTCTCTTCTCTCTGACATTCAGTTTTTTATTTGTTAAAAGAGGGAAACAATTCTAGGGC	intergenic							3.08458	6.25671
ASHGA5P046742	0.000830188	0.0107065	8.921	down	noncoding	NR_001533	TTTY8	RefSeq	542	chrY	-	6339071	6341671	TCTGTGAAAATGTTGTGAGTGTTGGATGTCTGCATGTGTGTGTGCCATTGTGTGCTTAGG	intergenic							3.90437	7.06157
ASHGA5P035840	0.0012999	0.0134678	8.90238	down	noncoding	TCONS_00004186	XLOC_002030	LincRNAs identified by Cabili et al	496	chr2	-	27957839	27958477	AAACTCATCCATCCAAACATCAGATAAACCTAAACTGAGAGACATTTCACAAAACTACAC	intergenic							3.69401	6.8482
ASHGA5P044923	0.00260381	0.0188613	8.88164	down	noncoding	ENST00000520562	RP11-10N23.2	GENCODE	939	chr8	+	94731801	94733395	CCCATCTCATCTCTAATATAGAAGTGAAAAAAGCCATGTAATCCCACATATAACAAGAGT	intron sense-overlapping	NM_145269	FAM92A1	protein FAM92A1	+	94712772	94740671	2.92901	6.07984
ASHGA5P028098	0.000274995	0.00589626	8.82955	down	noncoding	ENST00000552378	RP11-316A16.1	GENCODE	769	chr12	+	60486644	60489632	GTGTGTTTCTCTCTGTAGTGGATATCATGTTTGCTCATCGTTTGAAATGTCTTGTTATAT	intergenic							3.12993	6.27227
ASHGA5P043965	0.0044022	0.0254022	8.76796	down	noncoding	ENST00000506718	U66061.31	GENCODE	2762	chr7	+	142413073	142426272	AATAATTCCTTCCTTTGTCCTGTCAGCATAATGTGTATGGACCCTGCTAAGCAGCACCCA	intergenic							3.93996	7.0722
ASHGA5P028574	0.00405796	0.0243609	8.59325	down	noncoding	TCONS_00009857	XLOC_004270	LincRNAs identified by Cabili et al	3403	chr5	+	5688510	5701975	TTCTGTGTGTGTGTATGTTAGCTGTCAGCCAGGGATTTGGGAAGTTTGTGCTCTGATTCT	intergenic							4.20691	7.31011
ASHGA5P028035	0.00930156	0.0387111	8.53745	down	noncoding	ENST00000562848	AC012531.25	GENCODE	2680	chr12	+	54413693	54416373	TCTCTCTCTTTTTGCCAGCACAGATTAAATGGTTCTTTCAGATCTGCAAACAATAAAGGA	intron sense-overlapping	NM_014620	HOXC4	homeobox protein Hox-C4	+	54410641	54449814	4.28901	7.38281
ASHGA5P028035	0.00930156	0.0387111	8.53745	down	noncoding	ENST00000562848	AC012531.25	GENCODE	2680	chr12	+	54413693	54416373	TCTCTCTCTTTTTGCCAGCACAGATTAAATGGTTCTTTCAGATCTGCAAACAATAAAGGA	intron sense-overlapping	NM_153693	HOXC6	homeobox protein Hox-C6 isoform 2	+	54410641	54424607	4.28901	7.38281
ASHGA5P027155	0.0035204	0.0224028	8.51115	down	noncoding	ENST00000439788	RP3-467K16.7	GENCODE	727	chr1	-	15660661	15661960	TGCAGAGAAAAATGTAAAAAATCCTTTCCTTCCCTTATCAGAGGAACCCTGAGAAACCAG	intronic antisense	NM_052929	FHAD1	forkhead-associated domain-containing protein 1	+	15573767	15724622	5.37869	8.46804
ASHGA5P037425	0.00411292	0.0244679	8.49563	down	noncoding	ENST00000433344	AJ006995.3	GENCODE	572	chr21	+	29327239	29357614	GGGAACAATTTATCTATGTTAAAAAGATGTGTGTGTGTGAATGGATGTATATACGTGTGC	intergenic							3.8887	6.97543
ASHGA5P032567	0.000119366	0.00378239	8.44299	down	noncoding	ENST00000584805	RP11-159D12.10	GENCODE	6113	chr17	-	56154251	56160565	GCCTGCCTTTTTGAGGATAATTTTGAAGAAAAACTTTGCCTTGTCAGGCATGTTGTAGTT	bidirectional	NM_080677	DYNLL2	dynein light chain 2, cytoplasmic	+	56160779	56167618	3.7961	6.87385
ASHGA5P033445	0.00085881	0.010894	8.40898	down	noncoding	ENST00000570869	RP13-638C3.2	GENCODE	594	chr17	+	80535898	80536492	CATCCATCCTGGGTTTGATCAAATTACAACAGCCTTAAATTACCTTAGAAACATAGTTAC	intron sense-overlapping	NM_004514	FOXK2	forkhead box protein K2	+	80477593	80562483	2.58088	5.65281
ASHGA5P036403	0.000884112	0.0109817	8.28706	down	noncoding	uc002vea.3	BC130595	UCSC_knowngene	1287	chr2	+	211097415	211098702	TCTGTCCATTCCCACTACCAGAAAGAAACTCTGTGTTAGTTTTTCTTTTACCTTTATTGA	intergenic							4.62338	7.67424
ASHGA5P044084	0.00108255	0.0120189	8.23409	down	noncoding	ENST00000515608	CTD-2541M15.1	GENCODE	2147	chr8	-	6475995	6506328	CACACACAACACACACACACATTTATGATAATGCTTGTTCTTAACCAAAAACTGAGATCT	natural antisense	NM_024596	MCPH1	microcephalin isoform 1	+	6264112	6501140	8.72552	11.7671
ASHGA5P026421	0.000743226	0.0100988	8.1662	down	noncoding	BF940279		LincRNAs identified by Khalil et al	297	chr6	-	3777827	3778119	GTCCCTCTGAAACGTTTCTTCCTTCCACTCATTTCTCCTAGATGAAATTTTAACTAGTAT	intergenic							4.6	7.62967
ASHGA5P025642	2.00437e-05	0.00139717	8.13275	down	noncoding	NR_024145	GHRLOS	RefSeq	1657	chr3	+	10327437	10335133	TTAGAGAGAGGAGAGTTGGGGCCTTCCATTCCCTCCAGTAAATACTTGTTTTTCTTCCAC	natural antisense	NM_001134941	GHRL	appetite-regulating hormone isoform 2 preproprotein	-	10327433	10332419	5.06536	8.0891
ASHGA5P025642	2.00437e-05	0.00139717	8.13275	down	noncoding	NR_024145	GHRLOS	RefSeq	1657	chr3	+	10327437	10335133	TTAGAGAGAGGAGAGTTGGGGCCTTCCATTCCCTCCAGTAAATACTTGTTTTTCTTCCAC	natural antisense	NM_001134944	GHRL	appetite-regulating hormone isoform 3 preproprotein	-	10327433	10334631	5.06536	8.0891
ASHGA5P025642	2.00437e-05	0.00139717	8.13275	down	noncoding	NR_024145	GHRLOS	RefSeq	1657	chr3	+	10327437	10335133	TTAGAGAGAGGAGAGTTGGGGCCTTCCATTCCCTCCAGTAAATACTTGTTTTTCTTCCAC	natural antisense	NM_001134945	GHRL	appetite-regulating hormone isoform 4 preproprotein	-	10327433	10334631	5.06536	8.0891
ASHGA5P025642	2.00437e-05	0.00139717	8.13275	down	noncoding	NR_024145	GHRLOS	RefSeq	1657	chr3	+	10327437	10335133	TTAGAGAGAGGAGAGTTGGGGCCTTCCATTCCCTCCAGTAAATACTTGTTTTTCTTCCAC	natural antisense	NM_001134946	GHRL	appetite-regulating hormone isoform 5 preproprotein	-	10327433	10334631	5.06536	8.0891
ASHGA5P025642	2.00437e-05	0.00139717	8.13275	down	noncoding	NR_024145	GHRLOS	RefSeq	1657	chr3	+	10327437	10335133	TTAGAGAGAGGAGAGTTGGGGCCTTCCATTCCCTCCAGTAAATACTTGTTTTTCTTCCAC	natural antisense	NM_016362	GHRL	appetite-regulating hormone isoform 1 preproprotein	-	10327433	10332419	5.06536	8.0891
ASHGA5P037068	0.00210022	0.0169137	8.06283	down	noncoding	uc002xlo.3	BC036500	UCSC_knowngene	4105	chr20	+	42846121	42852332	CGTTTCTGGACAATTAGGGGTGTGTGTGGGTGTTTGTTGTAATAAAAAACTCTAAACCAA	intergenic							5.33672	8.34801
ASHGA5P058050	0.000184878	0.00478865	8.05119	down	noncoding	TCONS_00025741	XLOC_012558	LincRNAs identified by Cabili et al	1147	chr17	-	66793604	66796516	ATGCAGGAGTCCTGGGTTCAAATCTCCATTCCAGCTCTATCCAGTACCCAAAATTGTCAT	intergenic							5.81083	8.82003
ASHGA5P048131	0.00904321	0.0379572	8.00824	down	noncoding	TCONS_00014014	XLOC_006661	LincRNAs identified by Cabili et al	334	chr7	-	155000027	155000985	GAAATCCACCCTTCTTCCTTTGTTCTTTCTTCCTCCTTTGAAAGTGTCCCCATGGAGAAG	intergenic							6.98048	9.98197
ASHGA5P048939	0.00228352	0.0176795	7.98881	down	noncoding	TCONS_00025565	XLOC_012393	LincRNAs identified by Cabili et al	2051	chr17	-	13679959	13682238	ATATTTGTCCCCTTCCTTTCCACAGTCATCCTCTCAGCTCTTAATCTGGGTGTCTGGTTA	intergenic							6.90091	9.89889
ASHGA5P017105	0.00438458	0.025364	7.9273	down	noncoding	ENST00000437712	RP11-168K11.3	GENCODE	3043	chr9	+	116381507	116384914	CTCTCTGTCTTCCTGCTGTCTTCCAATATCCTACCTGGAAAGCAACGGGTCTGAAAGGTA	intergenic							5.96183	8.94866
ASHGA5P050594	0.00136235	0.0136076	7.84393	down	noncoding	ENST00000451400	AC013402.2	GENCODE	3778	chr2	+	105049724	105137290	CACACACACACAGCACAGATTTTTTTGATTATGTAGATTTCTTTTCCTACTGCAGTTTCA	intergenic							7.57086	10.5424
ASHGA5P027201	0.000332967	0.00654646	7.84098	down	noncoding	ENST00000551279	RP11-547C5.2	GENCODE	552	chr12	-	43373056	43390289	GGGACACTCCACTCAACTAATGATAAGAACATAACAAGAAAAAAGATCTTCTGCAAAAAC	intergenic							5.42499	8.39602
ASHGA5P027688	0.0117782	0.0446758	7.672	down	noncoding	ENST00000541797	RP11-749H20.1	GENCODE	462	chr12	-	128278071	128305728	CTACCTCTTCTCTCTCTACTTGAAATTCAAGCAAGACCTTGGAGAATACAGGTGGAGCTG	intergenic							5.12211	8.06171
ASHGA5P028185	0.00180521	0.0156889	7.62594	down	noncoding	ENST00000546936	RP11-315E17.1	GENCODE	547	chr12	+	81771820	81824122	CAGCATATACCCTCTCCTTCCCTTCGTTGCTGAATTTCTCAAAAGAGTATTACCTTCTTT	intronic antisense	NM_001220473	PPFIA2	liprin-alpha-2 isoform b	-	81652044	82152474	7.88877	10.8197
ASHGA5P028185	0.00180521	0.0156889	7.62594	down	noncoding	ENST00000546936	RP11-315E17.1	GENCODE	547	chr12	+	81771820	81824122	CAGCATATACCCTCTCCTTCCCTTCGTTGCTGAATTTCTCAAAAGAGTATTACCTTCTTT	intronic antisense	NM_001220474	PPFIA2	liprin-alpha-2 isoform c	-	81652044	82152474	7.88877	10.8197
ASHGA5P028185	0.00180521	0.0156889	7.62594	down	noncoding	ENST00000546936	RP11-315E17.1	GENCODE	547	chr12	+	81771820	81824122	CAGCATATACCCTCTCCTTCCCTTCGTTGCTGAATTTCTCAAAAGAGTATTACCTTCTTT	intronic antisense	NM_001220475	PPFIA2	liprin-alpha-2 isoform d	-	81652044	82152286	7.88877	10.8197
ASHGA5P028185	0.00180521	0.0156889	7.62594	down	noncoding	ENST00000546936	RP11-315E17.1	GENCODE	547	chr12	+	81771820	81824122	CAGCATATACCCTCTCCTTCCCTTCGTTGCTGAATTTCTCAAAAGAGTATTACCTTCTTT	intronic antisense	NM_001220476	PPFIA2	liprin-alpha-2 isoform e	-	81652044	82152286	7.88877	10.8197
ASHGA5P028185	0.00180521	0.0156889	7.62594	down	noncoding	ENST00000546936	RP11-315E17.1	GENCODE	547	chr12	+	81771820	81824122	CAGCATATACCCTCTCCTTCCCTTCGTTGCTGAATTTCTCAAAAGAGTATTACCTTCTTT	intronic antisense	NM_001220477	PPFIA2	liprin-alpha-2 isoform f	-	81652044	81992150	7.88877	10.8197
ASHGA5P028185	0.00180521	0.0156889	7.62594	down	noncoding	ENST00000546936	RP11-315E17.1	GENCODE	547	chr12	+	81771820	81824122	CAGCATATACCCTCTCCTTCCCTTCGTTGCTGAATTTCTCAAAAGAGTATTACCTTCTTT	intronic antisense	NM_001220478	PPFIA2	liprin-alpha-2 isoform g	-	81652044	81992150	7.88877	10.8197
ASHGA5P028185	0.00180521	0.0156889	7.62594	down	noncoding	ENST00000546936	RP11-315E17.1	GENCODE	547	chr12	+	81771820	81824122	CAGCATATACCCTCTCCTTCCCTTCGTTGCTGAATTTCTCAAAAGAGTATTACCTTCTTT	intronic antisense	NM_003625	PPFIA2	liprin-alpha-2 isoform a	-	81652044	82153109	7.88877	10.8197
ASHGA5P045261	0.00255422	0.0186628	7.43176	down	noncoding	uc011lrg.1	LOC441426	UCSC_knowngene	1423	chr9	-	69379291	69380714	GACAGCATTCCTGAGACTTTTTAAGTACTTTGTGTGTGTGTGATGGTCTAATAATCATAG	intergenic							3.81307	6.70677
ASHGA5P055924	0.000162319	0.00449471	7.42385	down	noncoding	ENST00000554382	RP11-388E23.2	GENCODE	545	chr14	-	24198361	24198906	TCTTAGCAGATCTTCCATTCCTAATCCAGGATCATTTCCAGGGCTCCCAGGTGAGAAAAT	intergenic							3.3837	6.27587
ASHGA5P025772	0.00201587	0.0166116	7.41375	down	noncoding	NR_034151	LOC730227	RefSeq	2741	chr1	-	203267885	203274453	TAAGTTTTCTGCCGTCTTCCTTCCTCATTGTGGTTTGGACCTTCTCGAGAAAGAATCTGG	bidirectional	NM_006763	BTG2	protein BTG2	+	203274663	203278729	5.04642	7.93662
ASHGA5P053673	0.000886064	0.0109817	7.38081	down	noncoding	uc010mkp.3	ATP8B5P	UCSC_knowngene	2511	chr9	+	35406751	35451105	TTTTTTTCTTTGTTTCTTTACAAATAGACATACTTCCCTTCCTTTCACAGGAGAAATGGT	intergenic							4.69293	7.57671
ASHGA5P029904	0.0112664	0.0436143	7.36093	down	noncoding	uc001zgr.1	LOC100288615	UCSC_knowngene	1673	chr15	-	32814893	32825942	GCGGCTTTCTTTTCTTTTCTCTTCCAGAGATTTATTCTTGTATGAAGGATAAAGAGGTAT	intergenic							2.90544	5.78533
ASHGA5P019884	0.000250365	0.00560251	7.34924	down	noncoding	NR_038303	LOC100505702	RefSeq	4300	chr4	+	79567147	79605655	TGCCATCCATCTGTCAGTAATAGATTCAGAAATGGTGCTGGCAGAGGAAACAGCAGCAAT	intergenic							2.4779	5.3555
ASHGA5P019755	0.000896818	0.0110338	7.31986	down	noncoding	ENST00000502645	CTD-2337A12.1	GENCODE	539	chr5	+	95297704	95970220	CCATTCACAGGAGCCTTCCTTTCTTAAAGACTCAATTATACAACATTCTTTCTACACTTA	intronic antisense	NM_000439	PCSK1	neuroendocrine convertase 1 isoform 1 preproprotein	-	95726039	95768985	2.88831	5.76012
ASHGA5P019755	0.000896818	0.0110338	7.31986	down	noncoding	ENST00000502645	CTD-2337A12.1	GENCODE	539	chr5	+	95297704	95970220	CCATTCACAGGAGCCTTCCTTTCTTAAAGACTCAATTATACAACATTCTTTCTACACTTA	intronic antisense	NM_001177875	PCSK1	neuroendocrine convertase 1 isoform 2	-	95726039	95767863	2.88831	5.76012
ASHGA5P019755	0.000896818	0.0110338	7.31986	down	noncoding	ENST00000502645	CTD-2337A12.1	GENCODE	539	chr5	+	95297704	95970220	CCATTCACAGGAGCCTTCCTTTCTTAAAGACTCAATTATACAACATTCTTTCTACACTTA	intronic antisense	NM_001177876	PCSK1	neuroendocrine convertase 1 isoform 3	-	95726039	95748689	2.88831	5.76012
ASHGA5P019755	0.000896818	0.0110338	7.31986	down	noncoding	ENST00000502645	CTD-2337A12.1	GENCODE	539	chr5	+	95297704	95970220	CCATTCACAGGAGCCTTCCTTTCTTAAAGACTCAATTATACAACATTCTTTCTACACTTA	natural antisense	NM_012081	ELL2	RNA polymerase II elongation factor ELL2	-	95220801	95297775	2.88831	5.76012
ASHGA5P030192	0.00518037	0.0280165	7.29737	down	noncoding	ENST00000559428	RP11-499F3.1	GENCODE	476	chr15	-	81926227	81934531	GTCTCTCCAATCTCCTTCTGCCTCCCTCTTCTAAGAACACTTATCATCGGATTTATGACC	intergenic							7.69086	10.5582
ASHGA5P000249	0.00099486	0.0115948	7.22479	down	noncoding	chr13:25892925-25912325-	chr13:25892925-25912325	LincRNAs identified by Khalil et al	19400	chr13	-	26994925	27014325	GTGGTGACCATTCCTTTCCTAAAAGCTCCCTTTTTCTTTGGCTTCTCTGATAACACTGCA	intergenic							5.36522	8.21817
ASHGA5P039476	0.00248489	0.0183225	7.1786	down	noncoding	TCONS_00022643	XLOC_010947	LincRNAs identified by Cabili et al	2211	chr14	+	104672214	104676114	GTTTCGCCATCCATCCAATGGTGACCACTCAGTCACTGCCAGATCCTGAGCAGATCCGTC	intergenic							4.37208	7.21579
ASHGA5P026034	0.00870194	0.0371656	7.1253	down	noncoding	ENST00000525429	RP11-687M24.4	GENCODE	593	chr11	-	125002742	125009483	CCACAATTCTCTCTCTCCTTAATTTAAAGAAATATAGAGGAGCATGTTTGAAGGAGCATA	intergenic							4.66181	7.49476
ASHGA5P035320	0.00443448	0.0254927	7.11355	down	noncoding	ENST00000419784	RP1-156L9.1	GENCODE	840	chr2	-	132741509	132751734	CTCTGTCCTCTTTCTCATACAATTTATCTTTTCCACATATGGATGGAATAAAACTGCAGA	intergenic							4.4728	7.30337
ASHGA5P032972	0.0031319	0.0209261	7.10068	down	noncoding	ENST00000583643	RP11-720N19.2	GENCODE	430	chr17	+	25792137	25792567	CTGCTTGCCATTTTTCTTCCCCTTCCATTTTTCTAATCTCCGGATAATTGTAAGAATGAA	intron sense-overlapping	ENST00000319524	KSR1	kinase suppressor of ras 1 [Source:HGNC Symbol;Acc:6465]	+	25783669	25950717	6.52857	9.35652
ASHGA5P032972	0.0031319	0.0209261	7.10068	down	noncoding	ENST00000583643	RP11-720N19.2	GENCODE	430	chr17	+	25792137	25792567	CTGCTTGCCATTTTTCTTCCCCTTCCATTTTTCTAATCTCCGGATAATTGTAAGAATGAA	intron sense-overlapping	ENST00000509603	KSR1	kinase suppressor of ras 1 [Source:HGNC Symbol;Acc:6465]	+	25783669	25944768	6.52857	9.35652
ASHGA5P032972	0.0031319	0.0209261	7.10068	down	noncoding	ENST00000583643	RP11-720N19.2	GENCODE	430	chr17	+	25792137	25792567	CTGCTTGCCATTTTTCTTCCCCTTCCATTTTTCTAATCTCCGGATAATTGTAAGAATGAA	intron sense-overlapping	ENST00000580163	KSR1	kinase suppressor of ras 1 [Source:HGNC Symbol;Acc:6465]	+	25783739	25909700	6.52857	9.35652
ASHGA5P000387	0.0011647	0.012529	7.07453	down	noncoding	chr3:128335025-128366725-	chr3:128335025-128366725	LincRNAs identified by Khalil et al	31700	chr3	-	126852335	126884035	CTCTTCCTGCCTTCTCAGTTGAATGGGTAATTCAAACCAGCCACATTAAACTCACTGGAG	intergenic							4.37765	7.20028
ASHGA5P039484	7.11033e-05	0.00282605	6.93358	down	noncoding	TCONS_00022649	XLOC_010951	LincRNAs identified by Cabili et al	204	chr14	+	105543607	105543911	CACCTGAGAGATCTCATCTTTACACACATGCACACTCAACACACAGGTGCACACACACAG	intergenic							3.89957	6.69317
ASHGA5P050511	0.00620105	0.0307626	6.91414	down	noncoding	ENST00000423402	PCBP1-AS1	GENCODE	553	chr2	-	70223949	70315039	GACTCCCCTTTCTTCCCAATGATGCTTCCTACTTCCTTTCCGTGCATAAGAAGCCGAATG	natural antisense	NM_006196	PCBP1	poly(rC)-binding protein 1	+	70314584	70316334	6.65532	9.44487
ASHGA5P033265	0.00249484	0.0183746	6.89897	down	noncoding	ENST00000583841	RP5-1171I10.4	GENCODE	840	chr17	+	56414606	56493127	TAGTTTTGGCCCTTCCTTTCTCTAAAGTTTATTCCCAAAAACAGGTAGCATTCCTGATTG	intronic antisense	NM_003168	SUPT4H1	transcription elongation factor SPT4	-	56422538	56429563	5.65997	8.44635
ASHGA5P033265	0.00249484	0.0183746	6.89897	down	noncoding	ENST00000583841	RP5-1171I10.4	GENCODE	840	chr17	+	56414606	56493127	TAGTTTTGGCCCTTCCTTTCTCTAAAGTTTATTCCCAAAAACAGGTAGCATTCCTGATTG	natural antisense	NM_017763	RNF43	E3 ubiquitin-protein ligase RNF43 precursor	-	56431037	56494931	5.65997	8.44635
ASHGA5P027395	0.000386679	0.0069913	6.87167	down	noncoding	ENST00000546135	RP11-338E21.1	GENCODE	254	chr12	-	64992857	65003239	AGAAAATGTCCATCCATCATAGCCAAACTAGCCAAACTCTCTTACATTATCTCCTTCAAT	intergenic							3.74923	6.52989
ASHGA5P033689	0.00050652	0.00821408	6.86786	down	noncoding	ENST00000580756	RP11-720L2.4	GENCODE	548	chr18	+	316736	319165	TAAAACTCTCCACTCCAAAAGAGCATCAGTTGTGTGTAGGTGAATAGAAAGCTGGTGTGT	intergenic							5.12517	7.90503
ASHGA5P053345	0.0182783	0.0580385	6.8529	down	noncoding	ENST00000496192	OR6W1P	GENCODE	1100	chr7	-	142759426	142760526	AAAGGTCTCTGGTTTTCCTAGGCAGAGGAGCTCCTTGGATTTTCTTATCTCCATGAGTTC	intergenic							5.55488	8.3316
ASHGA5P044336	0.000134634	0.00404385	6.83151	down	noncoding	ENST00000442274	RP11-956J14.1	GENCODE	480	chr8	-	73996021	73998114	TGTCGGCTCATTTTGTTGTCTCTGTGTGCATGTATTTGACATCACCTAGAAAAGCATTTG	intron sense-overlapping	NM_153225	SBSPON	somatomedin-B and thrombospondin type-1 domain-containing protein precursor	-	73976777	74005507	2.84206	5.61426
ASHGA5P040715	0.00136181	0.0136076	6.78284	down	noncoding	ENST00000514616	RP11-381K20.2	GENCODE	827	chr5	-	137150021	137225006	TCTTCCTTCATCTAGGATGCTTCCTCTTCTCTCAATATATTCTCACTTATGGGTATAAAG	intronic antisense	NM_001135940	MYOT	myotilin isoform b	+	137203544	137223540	3.24996	6.01185
ASHGA5P040715	0.00136181	0.0136076	6.78284	down	noncoding	ENST00000514616	RP11-381K20.2	GENCODE	827	chr5	-	137150021	137225006	TCTTCCTTCATCTAGGATGCTTCCTCTTCTCTCAATATATTCTCACTTATGGGTATAAAG	intronic antisense	NM_006790	MYOT	myotilin isoform a	+	137203544	137223540	3.24996	6.01185
ASHGA5P045295	0.00245585	0.018254	6.77821	down	noncoding	ENST00000413352	RP11-375O18.2	GENCODE	702	chr9	-	82132787	82147257	AAGGGCTGTTGAAGGTGCCTTGTTCTTCTTTCTTCTTCAATATAAGCAAAGCTATTTATA	intergenic							2.97152	5.73243
ASHGA5P037380	1.01035e-05	0.000950662	6.77469	down	noncoding	ENST00000448463	AP001347.6	GENCODE	780	chr21	+	15399771	15461367	GTTTGGATGTTAGCAGTTAGTTTAGCTTTGCGTCTTCAGAGCAATTGTTCTTAGCTACTT	intergenic							5.08805	7.84821
ASHGA5P022318	3.00481e-05	0.00170611	6.65142	down	noncoding	ENST00000554454	RP11-973N13.3	GENCODE	268	chr14	-	65019413	65063254	TTCTCATACACAGATGCAGCTATCTCACTGTCTGTCTCACACTCACTGAGGGTGATGTTT	natural antisense	NM_172365	PPP1R36	protein phosphatase 1 regulatory subunit 36	+	65016619	65056096	2.73653	5.47019
ASHGA5P034045	0.00555517	0.0291212	6.64748	down	noncoding	TCONS_00004060	XLOC_001908	LincRNAs identified by Cabili et al	303	chr2	+	238121307	238121926	GTAAGGTATGTGGTGTGTGACATATGTGTGATACGTGTGTGGCATCTGTGTAAGGTATGT	intergenic							3.40092	6.13373
ASHGA5P048179	0.00661256	0.0317741	6.63541	down	noncoding	TCONS_00013319	XLOC_005968	LincRNAs identified by Cabili et al	3365	chr7	+	2479468	2483692	CGGTGGTCTCATCTCTTCTCTCTCAAACCATGGATGGTGCCTTTTAAAGAAAATGACACC	intergenic							5.59069	8.32088
ASHGA5P056282	0.00629707	0.0309022	6.62146	down	noncoding	TCONS_00001745	XLOC_001120	LincRNAs identified by Cabili et al	262	chr1	-	183118843	183119157	AGGAGAGGGGTGTGGGCTGGGTGGGGTGTGAGCTGTGTGGTGTGTGAGCAGGAGAGGGGT	intergenic							7.02394	9.75109
ASHGA5P042991	0.000153028	0.00436006	6.60935	down	noncoding	ENST00000440074	RP11-89N17.3	GENCODE	380	chr7	-	33908112	33913843	GGTCATCTCCACTCCTAGAAGAGTTTCAAACATCTGTACTTTCAGACTGGAGGAAATAAG	intergenic							5.60065	8.32515
ASHGA5P023146	0.0050913	0.0276483	6.55135	down	noncoding	ENST00000571152	LINC00514	GENCODE	3385	chr16	+	3040194	3044510	TCTCTCTCTCCCACGAGCCCTTCCACTAAGAATGGCTATGGAGCAGGGTTCAGGACCTTC	intergenic							7.30194	10.0137
ASHGA5P048042	0.0045143	0.025743	6.45783	down	noncoding	ENST00000533814	RP11-58K22.5	GENCODE	543	chr11	-	44626057	44626887	AGCTGATTTTTAACCCGCCTTCCTTCTTGTCCATATAATAACAAACACCAGCCTTTCTTG	natural antisense	NM_001024844	CD82	CD82 antigen isoform 2	+	44587140	44641315	5.26937	7.96042
ASHGA5P048042	0.0045143	0.025743	6.45783	down	noncoding	ENST00000533814	RP11-58K22.5	GENCODE	543	chr11	-	44626057	44626887	AGCTGATTTTTAACCCGCCTTCCTTCTTGTCCATATAATAACAAACACCAGCCTTTCTTG	natural antisense	NM_002231	CD82	CD82 antigen isoform 1	+	44587140	44641315	5.26937	7.96042
ASHGA5P030636	0.00158185	0.0145717	6.4253	down	noncoding	uc002auv.1	AX748294	UCSC_knowngene	2433	chr15	+	72908150	72910583	TGCACATGTGCGCACGCACACACACACACAGCAGAAAATCTAGAAATAAACTATTTTAAT	intergenic							6.83693	9.52069
ASHGA5P036607	3.6695e-07	0.00012532	6.41623	down	noncoding	TCONS_00026421	XLOC_012768	LincRNAs identified by Cabili et al	794	chr18	-	11366765	11368644	CTTTCAAATAAAATGTGCCATCTGAAGGAGCACAGTTTCCACTCCAGACCTGCATGTACA	intergenic							2.43572	5.11745
ASHGA5P058112	0.00704391	0.0330208	6.41608	down	noncoding	TCONS_00026600	XLOC_012626	LincRNAs identified by Cabili et al	415	chr18	+	11490028	11503935	TATCATCACAGAGGAACTGTATTGATTTCCTTCCTTCAGTGGTCCAAGAACCTGCTGCTC	intergenic							3.70307	6.38476
ASHGA5P034965	0.000901898	0.0110338	6.38834	down	noncoding	TCONS_00004726	XLOC_001406	LincRNAs identified by Cabili et al	2136	chr2	+	27938797	27962232	GTATGCTACTGTTTAAGAAAGACAAGTATTCATCTGTGTGTGCGTGTGTTTGCTTATATA	intergenic							3.20941	5.88485
ASHGA5P022854	0.00499951	0.0273721	6.38808	down	noncoding	ENST00000564109	CTD-2311M21.2	GENCODE	915	chr15	+	74643108	74654244	TTTGGCCAGCCAGCCAGGAGGAAGAGGGACACGCATGAAATTTGGTGCCATGACTCGGAT	intronic antisense	NM_000781	CYP11A1	cholesterol side-chain cleavage enzyme, mitochondrial isoform a precursor	-	74630102	74660081	4.26225	6.93763
ASHGA5P022854	0.00499951	0.0273721	6.38808	down	noncoding	ENST00000564109	CTD-2311M21.2	GENCODE	915	chr15	+	74643108	74654244	TTTGGCCAGCCAGCCAGGAGGAAGAGGGACACGCATGAAATTTGGTGCCATGACTCGGAT	intronic antisense	NM_001099773	CYP11A1	cholesterol side-chain cleavage enzyme, mitochondrial isoform b	-	74630102	74658553	4.26225	6.93763
ASHGA5P058227	0.00121598	0.0128437	6.36706	down	noncoding	TCONS_00028635	XLOC_013683	LincRNAs identified by Cabili et al	358	chr20	-	22504161	22504856	TAGCTATCAAGACAGTGTTCGACTTCCTTCACTCCTTCCAGGGGCCAGCATGTGGCTGGC	intergenic							3.89349	6.56412
ASHGA5P030174	0.00656838	0.0316442	6.34372	down	noncoding	ENST00000558971	RP11-762H8.3	GENCODE	383	chr15	-	78549886	78556498	ACATCTCATCTCTCCTCTGTCACTCCTTCCCCATTATTAAAGTTTGTGGATGTTCCTTAG	natural antisense	NM_018602	DNAJA4	dnaJ homolog subfamily A member 4 isoform 1	+	78556486	78574538	7.50776	10.1731
ASHGA5P028563	0.00714877	0.0332685	6.33258	down	noncoding	ENST00000389600	GUCY1B2	GENCODE	2341	chr13	-	51589551	51640343	GTCTCTCTGCCTTTGATTTCTAGGTCCTTCCTCTGCTAATATCAGTCAGAAATTTAAAAT	intergenic							5.56578	8.22857
ASHGA5P021236	0.00271894	0.0192413	6.21163	down	noncoding	NR_037646	TMX2-CTNND1	RefSeq	6251	chr11	+	57479994	57586652	ATGAAGAACCGCAGATCCACTCTCTCCTTCCTGCTTCCTCCTTGCTGTGGTGGCTGGGAT	exon sense-overlapping	NM_001085458	CTNND1	catenin delta-1 isoform 1ABC	+	57529233	57586652	7.34986	9.98483
ASHGA5P021236	0.00271894	0.0192413	6.21163	down	noncoding	NR_037646	TMX2-CTNND1	RefSeq	6251	chr11	+	57479994	57586652	ATGAAGAACCGCAGATCCACTCTCTCCTTCCTGCTTCCTCCTTGCTGTGGTGGCTGGGAT	exon sense-overlapping	NM_001085459	CTNND1	catenin delta-1 isoform 1AB	+	57529233	57586652	7.34986	9.98483
ASHGA5P021236	0.00271894	0.0192413	6.21163	down	noncoding	NR_037646	TMX2-CTNND1	RefSeq	6251	chr11	+	57479994	57586652	ATGAAGAACCGCAGATCCACTCTCTCCTTCCTGCTTCCTCCTTGCTGTGGTGGCTGGGAT	exon sense-overlapping	NM_001085460	CTNND1	catenin delta-1 isoform 1A	+	57529233	57586652	7.34986	9.98483
ASHGA5P021236	0.00271894	0.0192413	6.21163	down	noncoding	NR_037646	TMX2-CTNND1	RefSeq	6251	chr11	+	57479994	57586652	ATGAAGAACCGCAGATCCACTCTCTCCTTCCTGCTTCCTCCTTGCTGTGGTGGCTGGGAT	exon sense-overlapping	NM_001085461	CTNND1	catenin delta-1 isoform 1A	+	57529233	57586652	7.34986	9.98483
ASHGA5P021236	0.00271894	0.0192413	6.21163	down	noncoding	NR_037646	TMX2-CTNND1	RefSeq	6251	chr11	+	57479994	57586652	ATGAAGAACCGCAGATCCACTCTCTCCTTCCTGCTTCCTCCTTGCTGTGGTGGCTGGGAT	exon sense-overlapping	NM_001085462	CTNND1	catenin delta-1 isoform 1A	+	57529233	57586652	7.34986	9.98483
ASHGA5P021236	0.00271894	0.0192413	6.21163	down	noncoding	NR_037646	TMX2-CTNND1	RefSeq	6251	chr11	+	57479994	57586652	ATGAAGAACCGCAGATCCACTCTCTCCTTCCTGCTTCCTCCTTGCTGTGGTGGCTGGGAT	exon sense-overlapping	NM_001085463	CTNND1	catenin delta-1 isoform 3ABC	+	57529233	57586652	7.34986	9.98483
ASHGA5P021236	0.00271894	0.0192413	6.21163	down	noncoding	NR_037646	TMX2-CTNND1	RefSeq	6251	chr11	+	57479994	57586652	ATGAAGAACCGCAGATCCACTCTCTCCTTCCTGCTTCCTCCTTGCTGTGGTGGCTGGGAT	exon sense-overlapping	NM_001085464	CTNND1	catenin delta-1 isoform 3AB	+	57529233	57586652	7.34986	9.98483
ASHGA5P021236	0.00271894	0.0192413	6.21163	down	noncoding	NR_037646	TMX2-CTNND1	RefSeq	6251	chr11	+	57479994	57586652	ATGAAGAACCGCAGATCCACTCTCTCCTTCCTGCTTCCTCCTTGCTGTGGTGGCTGGGAT	exon sense-overlapping	NM_001085465	CTNND1	catenin delta-1 isoform 3B	+	57529233	57586652	7.34986	9.98483
ASHGA5P021236	0.00271894	0.0192413	6.21163	down	noncoding	NR_037646	TMX2-CTNND1	RefSeq	6251	chr11	+	57479994	57586652	ATGAAGAACCGCAGATCCACTCTCTCCTTCCTGCTTCCTCCTTGCTGTGGTGGCTGGGAT	exon sense-overlapping	NM_001085466	CTNND1	catenin delta-1 isoform 3AC	+	57529233	57586652	7.34986	9.98483
ASHGA5P021236	0.00271894	0.0192413	6.21163	down	noncoding	NR_037646	TMX2-CTNND1	RefSeq	6251	chr11	+	57479994	57586652	ATGAAGAACCGCAGATCCACTCTCTCCTTCCTGCTTCCTCCTTGCTGTGGTGGCTGGGAT	exon sense-overlapping	NM_001085467	CTNND1	catenin delta-1 isoform 3A	+	57529233	57586652	7.34986	9.98483
ASHGA5P021236	0.00271894	0.0192413	6.21163	down	noncoding	NR_037646	TMX2-CTNND1	RefSeq	6251	chr11	+	57479994	57586652	ATGAAGAACCGCAGATCCACTCTCTCCTTCCTGCTTCCTCCTTGCTGTGGTGGCTGGGAT	exon sense-overlapping	NM_001085468	CTNND1	catenin delta-1 isoform 3A	+	57529233	57586652	7.34986	9.98483
ASHGA5P021236	0.00271894	0.0192413	6.21163	down	noncoding	NR_037646	TMX2-CTNND1	RefSeq	6251	chr11	+	57479994	57586652	ATGAAGAACCGCAGATCCACTCTCTCCTTCCTGCTTCCTCCTTGCTGTGGTGGCTGGGAT	exon sense-overlapping	NM_001085469	CTNND1	catenin delta-1 isoform 3A	+	57529233	57586652	7.34986	9.98483
ASHGA5P021236	0.00271894	0.0192413	6.21163	down	noncoding	NR_037646	TMX2-CTNND1	RefSeq	6251	chr11	+	57479994	57586652	ATGAAGAACCGCAGATCCACTCTCTCCTTCCTGCTTCCTCCTTGCTGTGGTGGCTGGGAT	exon sense-overlapping	NM_001144012	TMX2	thioredoxin-related transmembrane protein 2 isoform 2	+	57479994	57508445	7.34986	9.98483
ASHGA5P021236	0.00271894	0.0192413	6.21163	down	noncoding	NR_037646	TMX2-CTNND1	RefSeq	6251	chr11	+	57479994	57586652	ATGAAGAACCGCAGATCCACTCTCTCCTTCCTGCTTCCTCCTTGCTGTGGTGGCTGGGAT	exon sense-overlapping	NM_001206883	CTNND1	catenin delta-1 isoform 2ABC	+	57529233	57586652	7.34986	9.98483
ASHGA5P021236	0.00271894	0.0192413	6.21163	down	noncoding	NR_037646	TMX2-CTNND1	RefSeq	6251	chr11	+	57479994	57586652	ATGAAGAACCGCAGATCCACTCTCTCCTTCCTGCTTCCTCCTTGCTGTGGTGGCTGGGAT	exon sense-overlapping	NM_001206884	CTNND1	catenin delta-1 isoform 2AC	+	57529233	57586652	7.34986	9.98483
ASHGA5P021236	0.00271894	0.0192413	6.21163	down	noncoding	NR_037646	TMX2-CTNND1	RefSeq	6251	chr11	+	57479994	57586652	ATGAAGAACCGCAGATCCACTCTCTCCTTCCTGCTTCCTCCTTGCTGTGGTGGCTGGGAT	exon sense-overlapping	NM_001206885	CTNND1	catenin delta-1 isoform 1AC	+	57529233	57586652	7.34986	9.98483
ASHGA5P021236	0.00271894	0.0192413	6.21163	down	noncoding	NR_037646	TMX2-CTNND1	RefSeq	6251	chr11	+	57479994	57586652	ATGAAGAACCGCAGATCCACTCTCTCCTTCCTGCTTCCTCCTTGCTGTGGTGGCTGGGAT	exon sense-overlapping	NM_001206886	CTNND1	catenin delta-1 isoform 2AB	+	57529233	57586652	7.34986	9.98483
ASHGA5P021236	0.00271894	0.0192413	6.21163	down	noncoding	NR_037646	TMX2-CTNND1	RefSeq	6251	chr11	+	57479994	57586652	ATGAAGAACCGCAGATCCACTCTCTCCTTCCTGCTTCCTCCTTGCTGTGGTGGCTGGGAT	exon sense-overlapping	NM_001206887	CTNND1	catenin delta-1 isoform 2B	+	57529233	57586652	7.34986	9.98483
ASHGA5P021236	0.00271894	0.0192413	6.21163	down	noncoding	NR_037646	TMX2-CTNND1	RefSeq	6251	chr11	+	57479994	57586652	ATGAAGAACCGCAGATCCACTCTCTCCTTCCTGCTTCCTCCTTGCTGTGGTGGCTGGGAT	exon sense-overlapping	NM_001206888	CTNND1	catenin delta-1 isoform 2A	+	57529233	57586652	7.34986	9.98483
ASHGA5P021236	0.00271894	0.0192413	6.21163	down	noncoding	NR_037646	TMX2-CTNND1	RefSeq	6251	chr11	+	57479994	57586652	ATGAAGAACCGCAGATCCACTCTCTCCTTCCTGCTTCCTCCTTGCTGTGGTGGCTGGGAT	exon sense-overlapping	NM_001206889	CTNND1	catenin delta-1 isoform 2A	+	57529233	57586652	7.34986	9.98483
ASHGA5P021236	0.00271894	0.0192413	6.21163	down	noncoding	NR_037646	TMX2-CTNND1	RefSeq	6251	chr11	+	57479994	57586652	ATGAAGAACCGCAGATCCACTCTCTCCTTCCTGCTTCCTCCTTGCTGTGGTGGCTGGGAT	exon sense-overlapping	NM_001206890	CTNND1	catenin delta-1 isoform 3A	+	57529233	57586652	7.34986	9.98483
ASHGA5P021236	0.00271894	0.0192413	6.21163	down	noncoding	NR_037646	TMX2-CTNND1	RefSeq	6251	chr11	+	57479994	57586652	ATGAAGAACCGCAGATCCACTCTCTCCTTCCTGCTTCCTCCTTGCTGTGGTGGCTGGGAT	exon sense-overlapping	NM_001206891	CTNND1	catenin delta-1 isoform 2A	+	57529233	57586652	7.34986	9.98483
ASHGA5P021236	0.00271894	0.0192413	6.21163	down	noncoding	NR_037646	TMX2-CTNND1	RefSeq	6251	chr11	+	57479994	57586652	ATGAAGAACCGCAGATCCACTCTCTCCTTCCTGCTTCCTCCTTGCTGTGGTGGCTGGGAT	exon sense-overlapping	NM_001331	CTNND1	catenin delta-1 isoform 1B	+	57529233	57586652	7.34986	9.98483
ASHGA5P021236	0.00271894	0.0192413	6.21163	down	noncoding	NR_037646	TMX2-CTNND1	RefSeq	6251	chr11	+	57479994	57586652	ATGAAGAACCGCAGATCCACTCTCTCCTTCCTGCTTCCTCCTTGCTGTGGTGGCTGGGAT	exon sense-overlapping	NM_015959	TMX2	thioredoxin-related transmembrane protein 2 isoform 1 precursor	+	57479994	57508445	7.34986	9.98483
ASHGA5P021236	0.00271894	0.0192413	6.21163	down	noncoding	NR_037646	TMX2-CTNND1	RefSeq	6251	chr11	+	57479994	57586652	ATGAAGAACCGCAGATCCACTCTCTCCTTCCTGCTTCCTCCTTGCTGTGGTGGCTGGGAT	intron sense-overlapping	NM_170746	C11orf31	selenoprotein H	+	57508721	57510883	7.34986	9.98483
ASHGA5P021236	0.00271894	0.0192413	6.21163	down	noncoding	NR_037646	TMX2-CTNND1	RefSeq	6251	chr11	+	57479994	57586652	ATGAAGAACCGCAGATCCACTCTCTCCTTCCTGCTTCCTCCTTGCTGTGGTGGCTGGGAT	intronic antisense	NM_001145101	BTBD18	BTB/POZ domain-containing protein 18	-	57510985	57519253	7.34986	9.98483
ASHGA5P047906	0.00597338	0.0300387	6.13111	down	noncoding	ENST00000528151	RP11-236J17.6	GENCODE	597	chr11	-	8060135	8061246	GACTAACAACCACCATCACCCATTAATTAGGACATGGAAACATCTTCTGGTCGCAGTCTC	natural antisense	NM_003320	TUB	tubby protein homolog isoform a	+	8060179	8127654	5.54064	8.15678
ASHGA5P000579	0.000825578	0.0106919	6.0399	down	noncoding	DA312854		LincRNAs identified by Khalil et al	548	chr1	+	193426493	193430919	GGCAAACCAGTCTGAATCAATTTACCCTGTGATCCTGTCTGCTGGGAAGCATTGAAATAG	intergenic							2.5068	5.10132
ASHGA5P026670	0.0040081	0.0242035	6.01178	down	noncoding	ENST00000500113	RP11-705O3.1	GENCODE	1789	chr11	+	77850848	77854134	CCTTCCTCACATCATTCCAACCAACTTCCATCCTTACAATCGATTACTTTCCTGTAATAG	bidirectional	NM_001007027	ALG8	probable dolichyl pyrophosphate Glc1Man9GlcNAc2 alpha-1,3-glucosyltransferase isoform b	-	77811987	77850699	3.90129	6.48908
ASHGA5P026670	0.0040081	0.0242035	6.01178	down	noncoding	ENST00000500113	RP11-705O3.1	GENCODE	1789	chr11	+	77850848	77854134	CCTTCCTCACATCATTCCAACCAACTTCCATCCTTACAATCGATTACTTTCCTGTAATAG	bidirectional	NM_024079	ALG8	probable dolichyl pyrophosphate Glc1Man9GlcNAc2 alpha-1,3-glucosyltransferase isoform a	-	77811987	77850699	3.90129	6.48908
ASHGA5P016478	0.000605846	0.00914424	6.00325	down	noncoding	ENST00000430772	FTX	GENCODE	708	chrX	-	73467698	73513362	GAACAGGTATCTCAGATTCCCAGTTCTCAATCTTCCTTCCTCCTTACAAGATACAAGCAA	intergenic							5.44486	8.0306
ASHGA5P006531	0.000510958	0.00821408	5.98058	down	noncoding	NR_024564	LOC100130264	RefSeq	1789	chr20	-	19222945	19265240	CACCACCACATGTGAAGCCTCATGACTTATATGTCAGATTAAGCCTTTTGTTAAGAAGAT	intronic antisense	NM_020689	SLC24A3	sodium/potassium/calcium exchanger 3 precursor	+	19193289	19703541	2.83857	5.41886
ASHGA5P034597	0.00165398	0.0150259	5.95502	down	noncoding	TCONS_00003661	XLOC_001448	LincRNAs identified by Cabili et al	481	chr2	+	43357102	43358647	ATTATCTTTGTCCACAGTGTTTGGTGTGTGTTTGTGGGGTGTGTCAGGTGATTTTCCTGC	intergenic							4.76364	7.33775
ASHGA5P016648	0.00531372	0.0283552	5.94714	down	noncoding	ENST00000432511	RP11-134P9.1	GENCODE	505	chr1	-	203270293	203274387	ACCATTCACGCCGTCTTCCTTCCTCATTGTGGTTTGGACCTTCTCGAGAAAGAATCTGGC	bidirectional	NM_006763	BTG2	protein BTG2	+	203274663	203278729	5.52354	8.09574
ASHGA5P000009	0.00186245	0.0158659	5.92583	down	noncoding	AF070541		NRED	1576	chr18	+	31329599	31331156	GAAATGTTTGTCTCTTCATGTTTCTCTGTCTTTCCCTTTCTCAAAGTAACAACTTGGGTT	intergenic							4.75483	7.32185
ASHGA5P056555	2.53264e-05	0.00154684	5.9248	down	noncoding	TCONS_00006101	XLOC_002712	LincRNAs identified by Cabili et al	411	chr3	+	75606222	75608398	AAACACAAGGTCTACAGGTGTATCCAGCAGCTACGGAGAAACAGCGACCAGCGAGAACGG	intergenic							2.12605	4.69282
ASHGA5P043558	0.00218788	0.0172875	5.91229	down	noncoding	ENST00000448056	AC004540.5	GENCODE	567	chr7	+	26479878	26533734	TTGTTCTTGTCTCTGTCTCCAGAGTGAAGTTTGTCTCCCTGACAGTTAATCCTGAGACAG	intergenic							4.20854	6.77226
ASHGA5P017271	0.000169399	0.00458074	5.90568	down	noncoding	NR_004431	GHRLOS	RefSeq	1725	chr3	+	10327437	10335133	AAAGCTTTGGGAGAGTTGGGGCCTTCCATTCCCTCCAGTAAATACTTGTTTTTCTTCCAC	natural antisense	NM_001134941	GHRL	appetite-regulating hormone isoform 2 preproprotein	-	10327433	10332419	5.07641	7.63851
ASHGA5P017271	0.000169399	0.00458074	5.90568	down	noncoding	NR_004431	GHRLOS	RefSeq	1725	chr3	+	10327437	10335133	AAAGCTTTGGGAGAGTTGGGGCCTTCCATTCCCTCCAGTAAATACTTGTTTTTCTTCCAC	natural antisense	NM_001134944	GHRL	appetite-regulating hormone isoform 3 preproprotein	-	10327433	10334631	5.07641	7.63851
ASHGA5P017271	0.000169399	0.00458074	5.90568	down	noncoding	NR_004431	GHRLOS	RefSeq	1725	chr3	+	10327437	10335133	AAAGCTTTGGGAGAGTTGGGGCCTTCCATTCCCTCCAGTAAATACTTGTTTTTCTTCCAC	natural antisense	NM_001134945	GHRL	appetite-regulating hormone isoform 4 preproprotein	-	10327433	10334631	5.07641	7.63851
ASHGA5P017271	0.000169399	0.00458074	5.90568	down	noncoding	NR_004431	GHRLOS	RefSeq	1725	chr3	+	10327437	10335133	AAAGCTTTGGGAGAGTTGGGGCCTTCCATTCCCTCCAGTAAATACTTGTTTTTCTTCCAC	natural antisense	NM_001134946	GHRL	appetite-regulating hormone isoform 5 preproprotein	-	10327433	10334631	5.07641	7.63851
ASHGA5P017271	0.000169399	0.00458074	5.90568	down	noncoding	NR_004431	GHRLOS	RefSeq	1725	chr3	+	10327437	10335133	AAAGCTTTGGGAGAGTTGGGGCCTTCCATTCCCTCCAGTAAATACTTGTTTTTCTTCCAC	natural antisense	NM_016362	GHRL	appetite-regulating hormone isoform 1 preproprotein	-	10327433	10332419	5.07641	7.63851
ASHGA5P058716	0.0052035	0.0280361	5.85221	down	noncoding	uc.38-	uc.38	UCR	224	chr1	-	163939954	163940178	GTATGCTGTAAAAATAACCCTCCTTCCTTGATAGATTTCACTTGAGTGAAAATAACCCTT	intergenic							5.37043	7.91941
ASHGA5P055752	0.000380956	0.00695919	5.81614	down	noncoding	ENST00000456848	LINC00445	GENCODE	643	chr13	+	36271863	36273393	TTGGTTGCCACATAATGAAATGATTTTCCTTCCCTCTTTTATTTCCTTTCTTTCTTTTTT	intergenic							4.44888	6.98895
ASHGA5P035244	0.00104123	0.0117805	5.81094	down	noncoding	ENST00000446590	AC016683.5	GENCODE	559	chr2	-	113929111	113932914	TCTCTCTCCATCAAGCTGGGTAAGTCAGAAACCTGAAGTCACCAAGACCTAAATGCAAAC	intronic antisense	NM_012455	PSD4	PH and SEC7 domain-containing protein 4	+	113931559	113960677	3.34941	5.88818
ASHGA5P058702	0.00574567	0.0294994	5.76523	down	noncoding	uc.448-	uc.448	UCR	232	chr19	-	30841529	30841761	CTCTCCTCCTGCCACAACAATCAATTCCTCTTATAAATCTGATTAGATTTTATGATGCTT	intergenic							5.82736	8.35474
ASHGA5P042150	0.0197106	0.0602425	5.7602	down	noncoding	ENST00000522287	OSTCP1	GENCODE	1195	chr6	-	159262148	159278664	AACACCTTTTGGAGATGGCGTTTCTGTTTTCAGAAATTAACGTAAAATCAAGAAGCAAGA	intergenic							3.18332	5.70943
ASHGA5P043065	0.00463148	0.0261766	5.71865	down	noncoding	ENST00000422831	AC004920.3	GENCODE	482	chr7	-	50907059	50909689	TGTTGTCATCTGGTTTTTGTGTGTGTGTCATTTTCGCCATCTGTCCTGATTGCCCTACAG	intergenic							3.8695	6.38518
ASHGA5P057241	0.00130877	0.0134991	5.70736	down	noncoding	TCONS_00014901	XLOC_006972	LincRNAs identified by Cabili et al	209	chr8	-	1236887	1237155	ACTAGTTCCCCTCCTAACAGAACCACACACACACACACACACTGAACCAAAACTAGTTCC	intergenic							9.88271	12.3955
ASHGA5P000578	0.00119299	0.012688	5.67718	down	noncoding	DA298649		LincRNAs identified by Khalil et al	572	chr2	+	57846536	57878588	TCATTTTTTCACTGTTGGCCAACACCTAAGCAGCTCCCTATTTGCGTGTAACTGCTTCCT	intergenic							3.52338	6.02856
ASHGA5P057545	0.0002584	0.00570026	5.67574	down	noncoding	TCONS_00018653	XLOC_009007	LincRNAs identified by Cabili et al	376	chr10	-	134824439	134825072	TCACACAAGCACACATCACACGTGCTAAAACACATCACACAAGCACACATCACACACACT	intergenic							5.12696	7.63176
ASHGA5P052422	0.00852024	0.0367391	5.65828	down	noncoding	ENST00000523452	CTB-131B5.4	GENCODE	555	chr5	-	139452441	139488215	AACTCTCCTTCCTCTCCCTCCTTCCAGGGTTGCCGTGCAGGGAGTGTCAGCCACGTCTAG	intergenic							10.0269	12.5273
ASHGA5P058780	0.00519288	0.0280349	5.64209	down	noncoding	uc.432+	uc.432	UCR	211	chr18	+	35564931	35565142	CCTCCCTCTTATTAGAAACTGTGCATGAATTTGCATAGAATAAACTGAGCTCATAAATCA	intergenic							4.75117	7.2474
ASHGA5P028349	7.84405e-06	0.000839425	5.6363	down	noncoding	ENST00000545293	RP11-324E6.6	GENCODE	751	chr12	+	123198837	123200255	ATTTCTGCTTAGTTGTTTCATGATGTAGCTCAGTGTCTGTGTCTCTTTCTTACTTTGCAG	natural antisense	NM_006018	HCAR3	hydroxycarboxylic acid receptor 3	-	123199302	123201439	2.50935	5.0041
ASHGA5P030427	0.0232067	0.0658429	5.59121	down	noncoding	TCONS_00008449	XLOC_003908	LincRNAs identified by Cabili et al	314	chr4	-	24473714	24474219	GCTGTCGGAAGACACCCTCTTCTCTTCCTTCTTTTACAACTACGGCTCCTCCTGGGAAAC	intergenic							6.2846	8.76776
ASHGA5P040878	0.00169379	0.0151783	5.5884	down	noncoding	uc003mbe.1	AX746723	UCSC_knowngene	2775	chr5	-	170732984	170735759	TAATTATAAGCCTCCTTTCACTTCCTATCCAGATAGCTCTTAGGCAGCTCAGGAATGGGG	bidirectional	NM_021025	TLX3	T-cell leukemia homeobox protein 3	+	170736287	170739138	6.09778	8.58021
ASHGA5P038083	0.00709667	0.0330998	5.58049	down	noncoding	NR_037903	LOC100507582	RefSeq	994	chr3	-	4939913	4948186	TTAAAACATCCATCTGTCATCCATCTAGTGAGGTCAGGAGAGTGGCTGCTTAACTTCTGG	intergenic							3.17199	5.65238
ASHGA5P027339	0.000718063	0.00995678	5.57724	down	noncoding	ENST00000554053	RP11-973D8.3	GENCODE	306	chr12	-	56347468	56347884	ATTCAGATGAGGCACTTTCAATGTATGTGTTTTGGGGTGTGTGTATGTGTGTGCGCATGG	natural antisense	NM_001345	DGKA	diacylglycerol kinase alpha	+	56324945	56347807	5.38762	7.86717
ASHGA5P027339	0.000718063	0.00995678	5.57724	down	noncoding	ENST00000554053	RP11-973D8.3	GENCODE	306	chr12	-	56347468	56347884	ATTCAGATGAGGCACTTTCAATGTATGTGTTTTGGGGTGTGTGTATGTGTGTGCGCATGG	natural antisense	NM_201444	DGKA	diacylglycerol kinase alpha	+	56325811	56347807	5.38762	7.86717
ASHGA5P027339	0.000718063	0.00995678	5.57724	down	noncoding	ENST00000554053	RP11-973D8.3	GENCODE	306	chr12	-	56347468	56347884	ATTCAGATGAGGCACTTTCAATGTATGTGTTTTGGGGTGTGTGTATGTGTGTGCGCATGG	natural antisense	NM_201445	DGKA	diacylglycerol kinase alpha	+	56325811	56347807	5.38762	7.86717
ASHGA5P027339	0.000718063	0.00995678	5.57724	down	noncoding	ENST00000554053	RP11-973D8.3	GENCODE	306	chr12	-	56347468	56347884	ATTCAGATGAGGCACTTTCAATGTATGTGTTTTGGGGTGTGTGTATGTGTGTGCGCATGG	natural antisense	NM_201554	DGKA	diacylglycerol kinase alpha	+	56325811	56347807	5.38762	7.86717
ASHGA5P015077	0.0033793	0.0217906	5.549	down	noncoding	ENST00000416366	LINC00174	GENCODE	520	chr7	-	65855117	65858716	CCGCCCGGCCAGCCGCCCCATCCGGGAGCTGGATCTACCATGAAAGACTTCAGAGTCCAG	intergenic							7.53908	10.0113
ASHGA5P054602	0.000303198	0.0061826	5.53621	down	noncoding	uc001ldf.3	EMX2OS	UCSC_knowngene	7025	chr10	-	119243803	119301924	CCCTCAGCCACCGCCTCCTCCTCCACCAGCACCACTCCCTCCGGGGCACCCCGGTCCCTG	bidirectional	NM_001165924	EMX2	homeobox protein EMX2 isoform 2	+	119301955	119309057	10.6045	13.0734
ASHGA5P054602	0.000303198	0.0061826	5.53621	down	noncoding	uc001ldf.3	EMX2OS	UCSC_knowngene	7025	chr10	-	119243803	119301924	CCCTCAGCCACCGCCTCCTCCTCCACCAGCACCACTCCCTCCGGGGCACCCCGGTCCCTG	bidirectional	NM_004098	EMX2	homeobox protein EMX2 isoform 1	+	119301955	119309057	10.6045	13.0734
ASHGA5P045298	0.000927854	0.0112428	5.53032	down	noncoding	uc004ami.1	AK097447	UCSC_knowngene	2208	chr9	-	84545140	84592004	AGACACCTTTGCAGAAGAAAAAACAACTTCCTCTCTTCCTCTACTTCACTCTGGCAAGTT	natural antisense	NM_001145197	FAM75D4	putative protein FAM75D4	+	84543342	84549913	4.72105	7.18841
ASHGA5P045298	0.000927854	0.0112428	5.53032	down	noncoding	uc004ami.1	AK097447	UCSC_knowngene	2208	chr9	-	84545140	84592004	AGACACCTTTGCAGAAGAAAAAACAACTTCCTCTCTTCCTCTACTTCACTCTGGCAAGTT	natural antisense	NM_207416	FAM75D3	putative protein FAM75D3	+	84558414	84565009	4.72105	7.18841
ASHGA5P017012	0.00628383	0.0308701	5.4931	down	noncoding	ENST00000436716	RP11-287A8.6	GENCODE	576	chr9	+	108148968	108158299	AATAAGTTCATTTAAGTAGGCATGAGCCACCGCGCCCGGCCTAGAAGAGTTTTAATGAAC	intron sense-overlapping	NM_080546	SLC44A1	choline transporter-like protein 1	+	108006928	108153682	8.19647	10.6541
ASHGA5P023524	1.34065e-05	0.00113415	5.49094	down	noncoding	ENST00000583018	CTD-2514K5.4	GENCODE	513	chr17	-	72253034	72258159	TGAACTCCAGGCTGGCATTTAAAAGGTGCTGACTTTTAGGCTGGGCGTGGTGGCTCATGC	natural antisense	NM_032646	TTYH2	protein tweety homolog 2 isoform 1	+	72209695	72258157	5.39471	7.85177
ASHGA5P023524	1.34065e-05	0.00113415	5.49094	down	noncoding	ENST00000583018	CTD-2514K5.4	GENCODE	513	chr17	-	72253034	72258159	TGAACTCCAGGCTGGCATTTAAAAGGTGCTGACTTTTAGGCTGGGCGTGGTGGCTCATGC	natural antisense	NM_052869	TTYH2	protein tweety homolog 2 isoform 2	+	72244504	72258157	5.39471	7.85177
ASHGA5P043486	0.000536356	0.00843982	5.47925	down	noncoding	TCONS_00018266	XLOC_008547	LincRNAs identified by Cabili et al	375	chr10	+	89739716	89740717	GGAGGACAAAGAGGTCTTTCTGTCTTCCCTTCCTCTTTCAAACAGAGAGCTGATCAGTAT	intergenic							5.75058	8.20456
ASHGA5P057511	0.00334985	0.021707	5.46512	down	noncoding	TCONS_00018430	XLOC_008727	LincRNAs identified by Cabili et al	349	chr10	-	9905623	9920011	ATGTTAGCAGGTGTGTGGGTGAGTGCTCCCTGTGATGGAACGGTGTCCTGTTCAGGACTG	intergenic							3.8451	6.29535
ASHGA5P038851	0.00430542	0.0251268	5.44898	down	noncoding	ENST00000468961	THOC7-AS1	GENCODE	673	chr3	+	63846320	63847495	CTCTTCCTCTAATCATTCTGCACATAACAGAGACAGTGTGTATGTGTGTGTGTGTTTTTT	intronic antisense	NM_025075	THOC7	THO complex subunit 7 homolog	-	63819545	63849597	4.75979	7.20577
ASHGA5P033585	0.00872329	0.0372223	5.44468	down	noncoding	TCONS_00028623	XLOC_013658	LincRNAs identified by Cabili et al	652	chr20	-	12915531	12916654	GATGGTGGTGAGATGGGTGAGAAGGAACCAAGGGCGGAGGGAGACAAGGGCTGTTGCAGG	intergenic							2.89223	5.33708
ASHGA5P027269	5.69532e-05	0.00254498	5.43591	down	noncoding	ENST00000552768	RP11-70F11.11	GENCODE	282	chr12	-	50302664	50305646	CCCTCCCACATGTTCACAGACAAAATCTTCTTCCTTATTTAATAAAACAATATAATGACC	intergenic							5.58541	8.02793
ASHGA5P023618	0.013053	0.0475363	5.39264	down	noncoding	HMlincRNA1090+	HMlincRNA1090	LincRNAs identified by Khalil et al	1958	chr9	+	33081447	33083405	AAGGAAGTAAGATTTTCCCCCGGGTATTGTTTTTCTTGTTGACTCTGGTCACTGTGGTGC	intergenic							4.39629	6.82728
ASHGA5P032632	0.00924462	0.0385474	5.38885	down	noncoding	ENST00000446002	RP11-412H9.2	GENCODE	390	chr1	-	219086098	219089526	CCTCTCTCTATCCTTACTCACATGAAAATGCAATGGTTCGATTTGTAAAGGTAAATAAAC	intergenic							3.97245	6.40242
ASHGA5P051906	0.000759315	0.0102214	5.3839	down	noncoding	ENST00000506425	RP11-412P11.1	GENCODE	957	chr4	+	23004775	23043141	CTAGACTTTTTTTTAGGGTGATTGGGTCATTGTTTTTTCTCCTGGAACCCTGAGTCCTCA	intergenic							4.83484	7.26349
ASHGA5P020628	0.00565172	0.0292712	5.38097	down	noncoding	ENST00000517726	EVX1-AS	GENCODE	480	chr7	-	27281047	27286848	GTAGTAAATCATCTCTCACTCTCTCCTCCAAATGACTGATGGCCTTAAGTTTTCCACAGC	intronic antisense	NM_001989	EVX1	homeobox even-skipped homolog protein 1	+	27282163	27286192	5.72063	8.1485
ASHGA5P044363	0.00300642	0.020369	5.37733	down	noncoding	ENST00000456240	RP11-323I1.1	GENCODE	347	chr1	+	213904758	213967930	CCTTACTCCTCCTTTAATGAAGGGAAAAAATAAATTTTCCTGTATCAAAACCTAGACTGG	intergenic							2.92359	5.35048
ASHGA5P019067	0.000739405	0.0100773	5.37339	down	noncoding	ENST00000466740	AC108004.3	GENCODE	388	chr17	-	254325	263814	GAGAGGTAGGTTTATAGATGCGAATCCTTTCCTTCTCTGCCTCCGGGTCAGCAAGAATTC	natural antisense	NM_001013672	C17orf97	uncharacterized protein C17orf97	+	260117	264457	3.92958	6.35542
ASHGA5P026825	0.00571494	0.0294087	5.3703	down	noncoding	ENST00000423187	RP11-99H8.1	GENCODE	432	chr1	-	71181615	71185972	GGCTCTTCCTCCTGCTCCTGTCACCACAACAACTAGTGTGTGGAGCACAACTAGCCTGAC	intergenic							6.71906	9.14406
ASHGA5P041259	0.000232676	0.00537352	5.35252	down	noncoding	ENST00000512856	CTD-2260A17.1	GENCODE	993	chr5	+	96120480	96121703	GATCCATTCCACCTCTTCTGGGAGGATGAGCACATCTAGAGTAAATAAAATAAATCAAAG	natural antisense	NM_001040458	ERAP1	endoplasmic reticulum aminopeptidase 1 isoform b precursor	-	96110187	96143892	6.06909	8.4893
ASHGA5P041259	0.000232676	0.00537352	5.35252	down	noncoding	ENST00000512856	CTD-2260A17.1	GENCODE	993	chr5	+	96120480	96121703	GATCCATTCCACCTCTTCTGGGAGGATGAGCACATCTAGAGTAAATAAAATAAATCAAAG	natural antisense	NM_001198541	ERAP1	endoplasmic reticulum aminopeptidase 1 isoform b precursor	-	96110187	96149848	6.06909	8.4893
ASHGA5P041259	0.000232676	0.00537352	5.35252	down	noncoding	ENST00000512856	CTD-2260A17.1	GENCODE	993	chr5	+	96120480	96121703	GATCCATTCCACCTCTTCTGGGAGGATGAGCACATCTAGAGTAAATAAAATAAATCAAAG	natural antisense	NM_016442	ERAP1	endoplasmic reticulum aminopeptidase 1 isoform a precursor	-	96096513	96143892	6.06909	8.4893
ASHGA5P031935	0.00621586	0.0307863	5.34219	down	noncoding	ENST00000563230	RP11-556H2.3	GENCODE	433	chr16	+	79123946	79135651	GGAATTACCTGGGATCATTTCTCATCCTCTCTCTCTTTCTCTGTATTACTTAGCCTTAAA	intron sense-overlapping	NM_016373	WWOX	WW domain-containing oxidoreductase isoform 1	+	78133326	79246564	7.18256	9.59999
ASHGA5P031698	0.00100114	0.0115948	5.33151	down	noncoding	ENST00000569756	AC002519.6	GENCODE	551	chr16	+	31814283	31817242	TTTCACTCCACCCAGACCACTGCATCCATTTTTACCTTAAAATATTTGAAATGGACCACT	intergenic							6.28267	8.69722
ASHGA5P031918	0.0079927	0.035399	5.2757	down	noncoding	ENST00000561669	AC009120.10	GENCODE	475	chr16	+	74316312	74321417	GCTAACCTTCCTTCACAAGCCACCACATGCTGATTACATAGGAAAAAATAACTTTTAAAA	intergenic							3.77293	6.17229
ASHGA5P034129	3.21493e-05	0.00172583	5.269	down	noncoding	ENST00000562262	CTC-457E21.1	GENCODE	3355	chr19	-	22703796	22710751	GGACAAGTGGCTGTTTCTGTGACATATTTATTTTTACTGGCGTTTCATGTTGCTTAAAAA	intergenic							2.58786	4.98539
ASHGA5P049683	0.00114835	0.0124137	5.23549	down	noncoding	ENST00000433702	TMEM106A-AS1	GENCODE	966	chr17	-	41373436	41381062	CCACTCCAAAAGCCACCCACTCTAGAAGAGGAGGCTGCCAGGAATAAAATGTAATTTTTT	intergenic							4.88888	7.27721
ASHGA5P045748	0.000199624	0.00498438	5.23492	down	noncoding	uc004afc.3	AX747850	UCSC_knowngene	2547	chr9	+	68795666	68798213	GCAAGTAATACAGCCAAGACCCAGTTTACAGTGTCTAGTACCTAACAGACTCTTGACACG	intergenic							2.84644	5.23461
ASHGA5P000360	0.00389369	0.023708	5.23109	down	noncoding	chr2:237208375-237219525+	chr2:237208375-237219525	LincRNAs identified by Khalil et al	11150	chr2	+	237543636	237554786	ATTAAATACATTCCTTCCGTCTGCCTTCCCATCTATCATGGTGGAACATTGCAGGGATGG	intergenic							5.20219	7.5893
ASHGA5P036571	0.00153379	0.0143901	5.22209	down	noncoding	ENST00000448543	AC113618.1	GENCODE	553	chr2	+	239628964	239649421	TAAATAGAATATGTCTGCTCCTCTCACCTTCCTCTCTGCTCAGTAGTATGTCTCTTACCA	intergenic							6.64864	9.03327
ASHGA5P037589	0.00110568	0.0121519	5.20858	down	noncoding	ENST00000494740	PI4KAP2	GENCODE	2273	chr22	-	21827364	21842196	GGGTGCTCCTGTTGAAGAGTCCTTTTCCACTCCTCAAAACAGACCACTCGTCCTTGCCCG	intergenic							5.48762	7.86851
ASHGA5P034959	0.000183879	0.00478865	5.19642	down	noncoding	TCONS_00015932	XLOC_007303	LincRNAs identified by Cabili et al	556	chr9	+	24046211	24146893	TCAGTAATCATGGGACTGCTCCTGTTGCCAACTTTGCCTGTAGTTCACCAAAGTCAAGTT	intergenic							2.67613	5.05365
ASHGA5P051687	0.00145744	0.0140079	5.18697	down	noncoding	ENST00000514729	RP11-319G6.1	GENCODE	588	chr3	+	139108717	139141891	GTGTGTTTGTGTATGTGTCTTTTGTTGAGCTTCGGCTGGCTGTGTTATTCATTCAACAAA	bidirectional	NM_004766	COPB2	coatomer subunit beta'	-	139076432	139108522	5.00373	7.37862
ASHGA5P029306	1.21667e-05	0.00110134	5.18419	down	noncoding	TCONS_00008392	XLOC_003842	LincRNAs identified by Cabili et al	966	chr4	+	190598740	190600367	AATGAAGAAGCCAGAACACATGAACACGAAACCAGCCAACCAACAAACACAAGCAGCATG	intergenic							3.00837	5.38249
ASHGA5P056176	0.00381829	0.0234879	5.14386	down	noncoding	TCONS_00000200	XLOC_000199	LincRNAs identified by Cabili et al	2245	chr1	+	54447916	54452234	TATCCAGAATGCATGAGCCACCGTGCCTGGCCGACATTGTATATTTAAAATAGGTAAATT	intergenic							7.25955	9.6224
ASHGA5P035296	0.00539469	0.0286546	5.12633	down	noncoding	NR_036537	LOC100131320	RefSeq	2474	chr2	-	130724164	130738045	TCTCAGTCTTTCTCTCTTTTCTCTGGTGATTAAAAAGTTGGTTTTTGGTAAGGAAAAGGA	natural antisense	NM_032144	RAB6C	ras-related protein Rab-6C	+	130737234	130740311	5.35382	7.71175
ASHGA5P017524	0.0017057	0.0152405	5.12029	down	noncoding	ENST00000442712	RP11-439E19.7	GENCODE	522	chr1	+	246853348	246855123	ATATACACACGTCGATTTAGGTCTCTGTCTCTGGCAACTGAAAAGAGACCCAACAAAACA	intergenic							3.28932	5.64555
ASHGA5P015306	0.00171891	0.0153022	5.1092	down	noncoding	ENST00000419100	AC090696.2	GENCODE	418	chr15	+	28020766	28021944	ATCAAAAGCCTGTTCTCTCTCAGTTCTAAAGAGGCAGCCCAGGATGTGTTGAGTTACATC	intronic antisense	NM_000275	OCA2	P protein	-	28000022	28344458	2.99264	5.34574
ASHGA5P044296	0.00252481	0.0185509	5.09248	down	noncoding	uc003xut.3	BC047540	UCSC_knowngene	2744	chr8	-	62671658	62678528	TGTCAAAGATACCTGTCTCCCTCTCTTTCATTCTCTTTACCTTTCCATCAGACTATGTGG	intergenic							7.00138	9.34975
ASHGA5P057633	0.0038312	0.023536	5.08714	down	noncoding	TCONS_00019973	XLOC_009252	LincRNAs identified by Cabili et al	307	chr11	+	94371264	94371891	TTCCTAAGAGCCTTTTCCTTTCCCTTGAAGATTCCACAAATATGTCAGCGCTGGAAATGA	intergenic							5.17683	7.52369
ASHGA5P027485	0.0026644	0.0190306	5.08554	down	noncoding	ENST00000549930	RP11-511B23.2	GENCODE	249	chr12	-	93397533	93609455	TGAGCCACTGTGCCCGGCCAAATGAGCTATTTATGATGATCATAAGGACACAAGATAAGG	intergenic							7.69463	10.041
ASHGA5P016413	0.00358842	0.0226791	5.06352	down	noncoding	ENST00000430178	Z84812.3	pseudogene	571	chr16	+	61860	63351	TTGCTGCTGTGTGGAAGTTCACTCCTGCCTTTTCCTTCCTGACAGGCAGCTGCACCACTG								4.57805	6.91819
ASHGA5P054976	0.0215461	0.0630265	5.05725	down	noncoding	TCONS_00010596	XLOC_004244	LincRNAs identified by Cabili et al	1189	chr5	+	1043854	1046279	GAGAGTGTGTGAGGGTGTGTGAATGAGGGGGTTAGTGTGAACGAGTGGGCGAGTTTGTGA	intergenic							5.63462	7.97297
ASHGA5P035830	5.44581e-05	0.00247369	5.04356	down	noncoding	ENST00000418836	AC104654.1	GENCODE	534	chr2	+	42104213	42105095	CCCGCTGAATCTCGTCCTTTGCTTCATCCATTCCATTAAATAAGTCATATTGAAAATAAA	intergenic							5.11763	7.45208
ASHGA5P033345	0.00413298	0.0245397	5.02347	down	noncoding	TCONS_00028072	XLOC_013814	LincRNAs identified by Cabili et al	2067	chr20	-	56130114	56134053	CTCTCTCCCCAGAAGTTTTGTGATTTTGTTTGTTCATGTATTTTTTCCCACAATAAGGAA	intergenic							6.3521	8.68079
ASHGA5P000317	0.00429486	0.025081	5.01716	down	noncoding	chr18:58292100-58302600-	chr18:58292100-58302600	LincRNAs identified by Khalil et al	10500	chr18	-	60141120	60151620	TTGTATAAATAGTTCTGAGACTCCCTTCTATTTTTCTTCCTTCCTGAAGACAATCCGCAA	intergenic							5.33874	7.66561
ASHGA5P051627	0.00416376	0.024659	5.01279	down	noncoding	ENST00000469070	RP11-18H7.1	GENCODE	982	chr3	+	119814116	119818033	AAGAGGGGAGGTAAATTACTTTCCATCACTTCAATTTCAACCCATCAGATAAAACCTCTC	bidirectional	NM_001146156	GSK3B	glycogen synthase kinase-3 beta isoform 2	-	119540801	119813264	4.97562	7.30124
ASHGA5P051627	0.00416376	0.024659	5.01279	down	noncoding	ENST00000469070	RP11-18H7.1	GENCODE	982	chr3	+	119814116	119818033	AAGAGGGGAGGTAAATTACTTTCCATCACTTCAATTTCAACCCATCAGATAAAACCTCTC	bidirectional	NM_002093	GSK3B	glycogen synthase kinase-3 beta isoform 1	-	119540801	119813264	4.97562	7.30124
ASHGA5P035647	0.0162838	0.0545416	5.00757	down	noncoding	TCONS_00005055	XLOC_001935	LincRNAs identified by Cabili et al	234	chr2	-	747657	748017	TGATGTCGTTGTCGGTGGTGGTGGTGATGGTGAGGTCACTGTAGGAAAGCCCAGCAGAAT	intergenic							6.27422	8.59833
ASHGA5P054956	0.00829316	0.0361395	4.98335	down	noncoding	TCONS_00008387	XLOC_003839	LincRNAs identified by Cabili et al	363	chr4	+	190198000	190198810	GTATGTGACAGGCTCTCATAATCACCATCATCATGTGATCTTGTGCATGTTACAGGGAAG	intergenic							3.82413	6.14124
ASHGA5P036552	0.0207049	0.0618808	4.98133	down	noncoding	ENST00000413353	AC019068.2	GENCODE	489	chr2	+	237299716	237301031	CCAAGACTCATCTTTTTTCATCCAGATTTCTACACTCCAGAAGGGTAAAGAAAAAGAAAA	natural antisense	NM_001270584	IQCA1	IQ and AAA domain-containing protein 1 isoform 2	-	237232789	237416178	3.57476	5.89129
ASHGA5P036552	0.0207049	0.0618808	4.98133	down	noncoding	ENST00000413353	AC019068.2	GENCODE	489	chr2	+	237299716	237301031	CCAAGACTCATCTTTTTTCATCCAGATTTCTACACTCCAGAAGGGTAAAGAAAAAGAAAA	natural antisense	NM_001270585	IQCA1	IQ and AAA domain-containing protein 1 isoform 3	-	237232789	237412340	3.57476	5.89129
ASHGA5P036552	0.0207049	0.0618808	4.98133	down	noncoding	ENST00000413353	AC019068.2	GENCODE	489	chr2	+	237299716	237301031	CCAAGACTCATCTTTTTTCATCCAGATTTCTACACTCCAGAAGGGTAAAGAAAAAGAAAA	natural antisense	NM_024726	IQCA1	IQ and AAA domain-containing protein 1 isoform 1	-	237232789	237416178	3.57476	5.89129
ASHGA5P056123	0.00420771	0.0248236	4.94923	down	noncoding	TCONS_00026991	XLOC_013040	LincRNAs identified by Cabili et al	1013	chr19	+	32593957	32595580	ATGGCTGGTTTGGAATGGCAAATCCATCACTCTCTTTGCCTGTAAAATGCCAAGGAGACT	intergenic							3.87271	6.17992
ASHGA5P034288	0.000925777	0.0112324	4.932	down	noncoding	uc002pnr.1	BC128433	UCSC_knowngene	419	chr19	-	49946967	49947386	CATTCCCAGGTCCTGAAAAAGTGTGCGGCTGAGTCCTTTCCTCCTTCCTCGGTTTCCATG	intergenic							5.49374	7.79591
ASHGA5P057386	0.00514994	0.0278869	4.92559	down	noncoding	TCONS_00016578	XLOC_007352	LincRNAs identified by Cabili et al	2747	chr9	+	38650195	38662716	AAACATAGAAGTGTGAGCCACCGCACCTGGCCAATAGTGGGTATTAAAAGATAAACAAGT	intergenic							6.89296	9.19326
ASHGA5P046661	0.000218726	0.00514705	4.89145	down	noncoding	ENST00000441841	RP3-473B4.3	GENCODE	961	chrX	+	134083578	134087412	TAAGGAAGATTTGAAGATCAAAGACCTTCCTCTCTCTGGCTTCACATTTCTCATCACTAG	intergenic							3.88438	6.17464
ASHGA5P040312	0.0178921	0.0573055	4.88255	down	noncoding	ENST00000514848	CTD-2297D10.1	GENCODE	454	chr5	-	5142250	5176327	GGCACGAAGCCCTGGCTTTTCTTCTTCTTTCTTCTGTGTCTATAATGTGTTTTATCTTAA	intronic antisense	NM_139056	ADAMTS16	A disintegrin and metalloproteinase with thrombospondin motifs 16 preproprotein	+	5140442	5320412	4.43491	6.72254
ASHGA5P016589	0.000662019	0.00965898	4.86682	down	noncoding	ENST00000431997	RP1-288M22.2	GENCODE	454	chr6	+	72160536	72168577	CTTAAAATAAGGTGCTAGGAATCACTCCACTCTGAAGGATTCCCTTGTCTTCATGGCCCA	intergenic							5.27023	7.55321
ASHGA5P000589	0.00178773	0.0156253	4.86286	down	noncoding	DA962001		LincRNAs identified by Khalil et al	556	chr15	-	70827525	70828126	TTCAGTTTTCTCTTCTCTGCTCAGTAAGCTCAGTTTAGCTCTGTGTGTGTGCGTGTGTCT	intergenic							3.23406	5.51586
ASHGA5P046808	0.00220903	0.0173534	4.85807	down	noncoding	ENST00000528056	PRKY	GENCODE	7218	chrY	+	7142012	7249589	TGTCTTAATGCATTTGGATACTTTGGGGTGTGTGCCTGTCTGTGTGTGTGTCTTGGTGAA	intergenic							5.96586	8.24624
ASHGA5P044574	0.0469207	0.0987292	4.83997	down	noncoding	ENST00000433391	RP11-378J18.5	GENCODE	1302	chr1	+	222817656	222856105	GAGAGGTCAGTCCTTATGTTGCCTTGGTGCTTTGAAAATTAAATGTCATGAACAAAGAGT	intron sense-overlapping	NM_198551	MIA3	melanoma inhibitory activity protein 3 precursor	+	222791443	222841351	3.6205	5.8955
ASHGA5P044574	0.0469207	0.0987292	4.83997	down	noncoding	ENST00000433391	RP11-378J18.5	GENCODE	1302	chr1	+	222817656	222856105	GAGAGGTCAGTCCTTATGTTGCCTTGGTGCTTTGAAAATTAAATGTCATGAACAAAGAGT	intronic antisense	NM_022831	AIDA	axin interactor, dorsalization-associated protein	-	222841354	222885864	3.6205	5.8955
ASHGA5P050733	0.000401086	0.00718751	4.8005	down	noncoding	ENST00000456653	AC097500.2	GENCODE	825	chr2	-	186897871	186947960	ATGTGGAGCTTCTCTTTAGTTACAATTCTACTTTCTCCTTCACTTGAGTATCAGTCTTCA	intergenic							3.67431	5.9375
ASHGA5P015587	7.05804e-05	0.00282605	4.79967	down	noncoding	ENST00000421686	RP11-146D12.2	GENCODE	1791	chr9	+	42410362	42474269	ACTCTTAGACTGTGATGGAGCTGGACTGTGTAGAACAAATAACTAGAGAAACAAAGAGAA	exon sense-overlapping	NM_001012419	ANKRD20A3	ankyrin repeat domain-containing protein 20A3	+	42368302	42411863	2.54978	4.81271
ASHGA5P015587	7.05804e-05	0.00282605	4.79967	down	noncoding	ENST00000421686	RP11-146D12.2	GENCODE	1791	chr9	+	42410362	42474269	ACTCTTAGACTGTGATGGAGCTGGACTGTGTAGAACAAATAACTAGAGAAACAAAGAGAA	exon sense-overlapping	NM_001012421	ANKRD20A2	ankyrin repeat domain-containing protein 20A2	+	42368302	42411410	2.54978	4.81271
ASHGA5P045698	0.000905579	0.0110454	4.79941	down	noncoding	ENST00000457044	RP11-331F9.3	GENCODE	679	chr9	+	35642510	35643514	TCTGGGATTCCCATTCCATTTAGGCCTCCTGATTGCCCCATGTGTCCTTACAATAAACAA	intergenic							5.90966	8.17252
ASHGA5P053004	0.000715097	0.00995678	4.79642	down	noncoding	ENST00000517635	HOXA-AS2	GENCODE	2455	chr7	+	27154966	27162996	TGTAAAATAAATACATACTCCATCTCCACACCCATACTTTCTCCTTTTTCTTTCTTTTTT	intronic antisense	NM_030661	HOXA3	homeobox protein Hox-A3 isoform a	-	27145808	27159214	6.38932	8.65128
ASHGA5P053004	0.000715097	0.00995678	4.79642	down	noncoding	ENST00000517635	HOXA-AS2	GENCODE	2455	chr7	+	27154966	27162996	TGTAAAATAAATACATACTCCATCTCCACACCCATACTTTCTCCTTTTTCTTTCTTTTTT	natural antisense	NM_153631	HOXA3	homeobox protein Hox-A3 isoform a	-	27145808	27166639	6.38932	8.65128
ASHGA5P021259	0.0196808	0.0602384	4.78998	down	noncoding	ENST00000528872	RP1-296L11.1	GENCODE	576	chr11	+	31327231	31336095	AAAGCAAGAGAGTTTCTGATTGCCCGGGTTGAAGTGTATCTCATATTTCCCACAGTGTAA	natural antisense	NM_181807	DCDC1	doublecortin domain-containing protein 1	-	31284170	31391357	3.18095	5.44097
ASHGA5P037897	0.00309196	0.0207503	4.78861	down	noncoding	TCONS_00024751	XLOC_012036	LincRNAs identified by Cabili et al	679	chr16	-	85433936	85434846	TGCCTCCTCTCACACACACAGATGCGCAAGGTCAAAGCTAGGTCTCCATTATGACCCCTT	intergenic							5.01246	7.27206
ASHGA5P036605	0.0420257	0.0925751	4.78009	down	noncoding	ENST00000373226	RP11-435D7.3	GENCODE	539	chr1	+	36204989	36209177	TTCCTCCTCCTCGTCTTCCTCTTCCCTAAAATGTAAATCAATGAATCAATAAATAAGTTG	natural antisense	NM_001190481	CLSPN	claspin isoform 2	-	36197712	36235551	9.03331	11.2903
ASHGA5P036605	0.0420257	0.0925751	4.78009	down	noncoding	ENST00000373226	RP11-435D7.3	GENCODE	539	chr1	+	36204989	36209177	TTCCTCCTCCTCGTCTTCCTCTTCCCTAAAATGTAAATCAATGAATCAATAAATAAGTTG	natural antisense	NM_022111	CLSPN	claspin isoform 1	-	36197712	36235551	9.03331	11.2903
ASHGA5P051436	6.94137e-05	0.00279604	4.75778	down	noncoding	NR_038840	LOC645206	RefSeq	1666	chr3	+	28616768	28799828	GGGCTGTGTTGTTTGATTTGTATAGTACTGATCTGTAGGTTAAAATACGTTTCCTTTCTT	intergenic							2.42698	4.67727
ASHGA5P056122	0.000156571	0.00436177	4.75494	down	noncoding	TCONS_00026989	XLOC_013039	LincRNAs identified by Cabili et al	1024	chr19	+	32563114	32565007	CAGTCACCTGTCTGTCCACAATGACAATGGGGCATGAAAAAATGCCCTAACTCAGGGCAT	intergenic							2.64377	4.8932
ASHGA5P047217	0.000298944	0.00615304	4.71912	down	noncoding	ENST00000436340	RP11-195B3.1	GENCODE	463	chr10	+	3308194	3309207	ATATGAGGAACTTAGCAAATGGACTCATTCTTCATTTTCTTCTTCCTCTCTCTCCTGATT	intergenic							3.37002	5.60854
ASHGA5P022215	0.0103476	0.0415028	4.71614	down	noncoding	ENST00000552466	RP11-114H23.1	GENCODE	357	chr12	-	76084536	76086138	CACACCTGTCTGTCTCACCTCTGACAACCTTGATATAAATTAAACAATGAATAAGAACAA	intergenic							5.18982	7.42742
ASHGA5P023631	2.59563e-05	0.00156433	4.7142	down	noncoding	HMlincRNA1179-	HMlincRNA1179	LincRNAs identified by Khalil et al	5414	chr7	-	152737017	152742431	TAACTCTGGATGGACAGAAAACACATTAGTCATTTCCCAGCTCCATTCCAAAGCCTAGCT	intergenic							3.85544	6.09245
ASHGA5P029067	0.000305418	0.00620321	4.70956	down	noncoding	EB386294		LincRNAs identified by Khalil et al	795	chr10	-	20678507	20679302	CCTGGAATTCCATTTCTTTTCCATGCCACGTAACTGCATCCTGATGCCCTGATGATTTTG	intergenic							4.2859	6.52149
ASHGA5P042728	0.00153351	0.0143901	4.69791	down	noncoding	NR_027284	LINC00602	RefSeq	2107	chr6	+	166401038	166403103	AACAGACATTGGTTCTCTTTCCTCTTCCCATTCATACATTTCTGTTGGAGTCCTAGGGCC	intergenic							4.08601	6.31803
ASHGA5P031819	0.00171559	0.0152993	4.68691	down	noncoding	TCONS_00006534	XLOC_003157	LincRNAs identified by Cabili et al	1160	chr3	-	71834485	71835757	AGGGTATTTGATTGATGTCTGTCTTCTCTGTTAAGTTATTCCACCGTGAGGAGAGAGCCG	intergenic							3.23876	5.46739
ASHGA5P029148	0.0219277	0.0636556	4.67618	down	noncoding	ENST00000554196	LINC00520	GENCODE	514	chr14	-	56254644	56260078	GCAGGTTCTGCTTAGAGGATTGGTGTGAAAATAAGGTTATTATTTGACATATTGAGTTGA	intergenic							3.26774	5.49307
ASHGA5P056387	0.0146229	0.051075	4.66991	down	noncoding	TCONS_00003845	XLOC_001650	LincRNAs identified by Cabili et al	846	chr2	+	123247932	123262758	GAGAGCCTGGTTACTTGCTTTCTTTCAAGCATGCTTTGTGCTTTCCTTCTCCATTAATTT	intergenic							3.15223	5.37562
ASHGA5P047405	0.00715086	0.0332685	4.64151	down	noncoding	TCONS_00014981	XLOC_007062	LincRNAs identified by Cabili et al	281	chr8	-	39267714	39274897	TGTATTTGTTACTCTCCTCTCTCCAAGCAGTAGCATTCAAGGTTGTTAGAGACTGGTGCT	intergenic							4.81801	7.0326
ASHGA5P051091	0.00390206	0.0237341	4.64042	down	noncoding	ENST00000423808	AL035610.1	GENCODE	449	chr21	+	29462632	29475109	TATCTAAGATACACACACAACCACACACGCGCACACACGGTAGAGATAAATATGTTCGAA	intergenic							6.42495	8.63921
ASHGA5P037984	0.0253034	0.0696279	4.64005	down	noncoding	uc003avi.1	BC127823	UCSC_knowngene	574	chr22	+	38615652	38616226	TTGTGACACGAGGCTCTTCCTAAGTCAGGAGCTAGTATAAGCCCAGCCTGCTGGGGGTTC	natural antisense	NM_001195071	TMEM184B	transmembrane protein 184B isoform a	-	38615297	38668670	5.45601	7.67015
ASHGA5P037984	0.0253034	0.0696279	4.64005	down	noncoding	uc003avi.1	BC127823	UCSC_knowngene	574	chr22	+	38615652	38616226	TTGTGACACGAGGCTCTTCCTAAGTCAGGAGCTAGTATAAGCCCAGCCTGCTGGGGGTTC	natural antisense	NM_001195072	TMEM184B	transmembrane protein 184B isoform b	-	38615297	38669040	5.45601	7.67015
ASHGA5P037984	0.0253034	0.0696279	4.64005	down	noncoding	uc003avi.1	BC127823	UCSC_knowngene	574	chr22	+	38615652	38616226	TTGTGACACGAGGCTCTTCCTAAGTCAGGAGCTAGTATAAGCCCAGCCTGCTGGGGGTTC	natural antisense	NM_012264	TMEM184B	transmembrane protein 184B isoform a	-	38615297	38669040	5.45601	7.67015
ASHGA5P033391	0.00175254	0.0154347	4.63563	down	noncoding	NR_040050	LOC100507351	RefSeq	4232	chr17	+	75543022	75561103	ATCTCCTTCCCAGCTCTCCTTTTCTGTAAGACTTCACAGAACAGGTTCAAAATCCATTTG	intergenic							6.60971	8.82248
ASHGA5P054958	0.0057764	0.0296058	4.62103	down	noncoding	TCONS_00008983	XLOC_003839	LincRNAs identified by Cabili et al	307	chr4	+	190198382	190198838	ATGTGACAGACTCTCATAGTCACCATCATCAAGGGAATCTTGTGCATGTTACAGGGAAGC	intergenic							3.58328	5.79149
ASHGA5P053029	0.000932437	0.0112835	4.61668	down	noncoding	ENST00000584023	AC005154.6	GENCODE	638	chr7	-	30614038	30616358	CAACTTTCCTTGGTGTCCTTCTTGTATATTTACTGTAAGCTGGATATAATAGTAGCCATT	intergenic							3.97858	6.18543
ASHGA5P032094	0.00281679	0.0197068	4.61352	down	noncoding	ENST00000575741	RP11-235E17.6	GENCODE	874	chr17	-	3558914	3561386	ACCTGGATGAATGAACACACACCCTTCCTTTCCCAGGCTCTGCCGTGTCTTCTGTCAAAG	natural antisense	NM_001031681	CTNS	cystinosin isoform 1 precursor	+	3539761	3566397	5.83272	8.03858
ASHGA5P032094	0.00281679	0.0197068	4.61352	down	noncoding	ENST00000575741	RP11-235E17.6	GENCODE	874	chr17	-	3558914	3561386	ACCTGGATGAATGAACACACACCCTTCCTTTCCCAGGCTCTGCCGTGTCTTCTGTCAAAG	natural antisense	NM_004937	CTNS	cystinosin isoform 2 precursor	+	3539761	3566397	5.83272	8.03858
ASHGA5P048227	0.0154386	0.0527257	4.59087	down	noncoding	ENST00000528650	RP11-867G23.4	GENCODE	480	chr11	-	66044339	66044963	ACCAAAGACTTGCTTTCTTGCAGGAAGCAGCTGTGCCAGAGGGCAGGGGACTAGGATCCT	natural antisense	NM_030981	RAB1B	ras-related protein Rab-1B	+	66036055	66044963	3.90575	6.10451
ASHGA5P018357	0.00615631	0.030635	4.57741	down	noncoding	ENST00000452505	RP1-302D9.2	GENCODE	550	chr22	+	33504514	33512280	ATCTCTCTACCATCTAACAAGCCAGATATTGTCCTCTCTCTCTGGAGAAAGCATCAGCAG	intergenic							5.24925	7.44379
ASHGA5P046166	0.00137168	0.0136149	4.5632	down	noncoding	TCONS_00001446	XLOC_000768	LincRNAs identified by Cabili et al	726	chr1	-	31168511	31181236	ACCACGGTGGAATTATGTGGTTTGAATGGGGCCGGAATGGCTGGCTTTGAGGCTGCTAGG	intergenic							2.77244	4.96249
ASHGA5P047810	0.00531992	0.0283719	4.56066	down	noncoding	uc001lsr.1	AX747537	UCSC_knowngene	701	chr11	-	881475	882176	GTGCCCAACCTGCCATTAATCCCATCCATCCTGAGCCCGACGTGGTCATTTCTCTCACCA	intron sense-overlapping	NM_001142674	CHID1	chitinase domain-containing protein 1 isoform a precursor	-	867858	910874	6.49301	8.68225
ASHGA5P047810	0.00531992	0.0283719	4.56066	down	noncoding	uc001lsr.1	AX747537	UCSC_knowngene	701	chr11	-	881475	882176	GTGCCCAACCTGCCATTAATCCCATCCATCCTGAGCCCGACGTGGTCATTTCTCTCACCA	intron sense-overlapping	NM_001142675	CHID1	chitinase domain-containing protein 1 isoform a precursor	-	867858	915058	6.49301	8.68225
ASHGA5P047810	0.00531992	0.0283719	4.56066	down	noncoding	uc001lsr.1	AX747537	UCSC_knowngene	701	chr11	-	881475	882176	GTGCCCAACCTGCCATTAATCCCATCCATCCTGAGCCCGACGTGGTCATTTCTCTCACCA	intron sense-overlapping	NM_001142676	CHID1	chitinase domain-containing protein 1 isoform b precursor	-	867858	910874	6.49301	8.68225
ASHGA5P047810	0.00531992	0.0283719	4.56066	down	noncoding	uc001lsr.1	AX747537	UCSC_knowngene	701	chr11	-	881475	882176	GTGCCCAACCTGCCATTAATCCCATCCATCCTGAGCCCGACGTGGTCATTTCTCTCACCA	intron sense-overlapping	NM_001142677	CHID1	chitinase domain-containing protein 1 isoform c precursor	-	867858	910874	6.49301	8.68225
ASHGA5P047810	0.00531992	0.0283719	4.56066	down	noncoding	uc001lsr.1	AX747537	UCSC_knowngene	701	chr11	-	881475	882176	GTGCCCAACCTGCCATTAATCCCATCCATCCTGAGCCCGACGTGGTCATTTCTCTCACCA	intron sense-overlapping	NM_023947	CHID1	chitinase domain-containing protein 1 isoform a precursor	-	867858	910874	6.49301	8.68225
ASHGA5P037647	0.0189339	0.0590627	4.53677	down	noncoding	NR_002727	RFPL1-AS1	RefSeq	5125	chr22	-	29833003	29838118	TGACCATTAAGCTTCTTGGACCTTGAGTACTTCACACAGTGTTAAGATAAAAGTCACAAT	natural antisense	NM_021026	RFPL1	ret finger protein-like 1	+	29834571	29838444	4.66033	6.84199
ASHGA5P038317	6.59294e-05	0.00270635	4.53601	down	noncoding	ENST00000497543	FAM86DP	GENCODE	2152	chr3	-	75470702	75484199	GGGGCAGACGCGTGCTCGGTGTGGGGTACAGTTCACGATCATTTTCACGACTTTTTAAAG	intergenic							3.58463	5.76605
ASHGA5P058552	0.01881	0.0588554	4.52611	down	noncoding	uc010gri.1	GGT3P	UCSC_knowngene	1324	chr22	-	18761201	18769844	CTGTCTTGTGGGGGCATTGTGACAGCTGAGGACCTGAACAACTACTGTGCTGAGCTGATC	intergenic							3.85325	6.03152
ASHGA5P041071	0.00627607	0.0308495	4.52494	down	noncoding	ENST00000504469	RP11-159F24.3	GENCODE	440	chr5	+	43484060	43488542	CTGTGAAAGAACTGCTCTCTCCTTCCTTGAATTCCTATAGCATATTAATTAATCACATAC	intronic antisense	NM_198566	C5orf34	uncharacterized protein C5orf34	-	43486802	43515273	5.74984	7.92774
ASHGA5P016303	0.0202326	0.0610887	4.52175	down	noncoding	ENST00000429095	AC007092.1	GENCODE	545	chr2	+	58655472	59152836	TGGTGCAGAGGGACTTACCAATTTGGGATTCTTCCAGGAGCTGAAAACTGATTGCAAATA	intergenic							3.53003	5.70691
ASHGA5P044071	0.00463292	0.0261766	4.52162	down	noncoding	ENST00000520842	RP11-134O21.1	GENCODE	577	chr8	-	2554055	2585957	GAGCTGGCTGGCCCATCCTCTCTTCTTTCCCTTGTTTTTCTATTTTATCTTTCAAAGCAG	intergenic							7.14063	9.31747
ASHGA5P042127	0.0136102	0.0486619	4.51513	down	noncoding	TCONS_00020285	XLOC_009629	LincRNAs identified by Cabili et al	392	chr12	+	6281425	6282124	CTCATCTCTCTGTGACTCTGTTTTCTTTAGCTGTCTATGGAAAGAATAAGCATGAGAAGC	intergenic							4.51103	6.6858
ASHGA5P031615	0.00288622	0.0200556	4.49685	down	noncoding	ENST00000570080	CTD-2270L9.4	GENCODE	730	chr16	+	23464078	23468909	ATCCACTCCTTCACGTCGAAGTCGTCTGCCAGGAACTTGGAGAAGTCCATGGCGGAACTG	natural antisense	NM_153603	COG7	conserved oligomeric Golgi complex subunit 7	-	23399813	23464512	5.23587	7.40478
ASHGA5P030046	0.00173831	0.0153928	4.48468	down	noncoding	TCONS_00007997	XLOC_003460	LincRNAs identified by Cabili et al	482	chr4	+	13487673	13491548	AAGAAAAAAGGAGAGTTACAGGGGAGTCCTCCTCCTCCCTTCCTTTGCTGTCATTATTAG	intergenic							7.47276	9.63777
ASHGA5P033041	0.000251658	0.00560251	4.48268	down	noncoding	ENST00000584688	RP11-40A13.1	GENCODE	557	chr17	+	31438875	31458761	TTTTGTAAACACCTGAAGGAGAGAAGAGAGAGAGAGAGAGAAGCACATGGGTAACTTCAG	natural antisense	NM_001094	ASIC2	acid-sensing ion channel 2 isoform MDEG1	-	31340105	32483825	4.33175	6.49611
ASHGA5P033041	0.000251658	0.00560251	4.48268	down	noncoding	ENST00000584688	RP11-40A13.1	GENCODE	557	chr17	+	31438875	31458761	TTTTGTAAACACCTGAAGGAGAGAAGAGAGAGAGAGAGAGAAGCACATGGGTAACTTCAG	natural antisense	NM_183377	ASIC2	acid-sensing ion channel 2 isoform MDEG2	-	31340105	31620006	4.33175	6.49611
ASHGA5P041596	0.00190556	0.0161204	4.47953	down	noncoding	ENST00000514793	RP11-1379J22.5	GENCODE	485	chr5	+	179085236	179091433	CCTTTCCCTTCTCAGGACATACACAGGACTGGGAGAAAATAGACTAAGTATTTGATATTA	intergenic							4.45197	6.61532
ASHGA5P050151	0.00859733	0.0368935	4.46687	down	noncoding	TCONS_00018849	XLOC_008653	LincRNAs identified by Cabili et al	422	chr10	+	125319845	125321719	AAAGCCAGCCATCCCCAGCGCTGTAACTGAGTGGCCAGTGGTGGGAGGTGAGGTCACAGA	intergenic							5.15348	7.31274
ASHGA5P053355	0.00939979	0.0390254	4.46163	down	noncoding	ENST00000486094	RP4-798C17.6	GENCODE	819	chr7	-	144004240	144052778	GGGGCTGATCCCTGGGAAAGGCCTGGCTTCCTCTTCCTTCCTGTCCCTGCCCCACCTCCG	intronic antisense	NM_001001802	OR2A42	olfactory receptor 2A1/2A42	+	144015217	144016150	7.70961	9.86718
ASHGA5P053355	0.00939979	0.0390254	4.46163	down	noncoding	ENST00000486094	RP4-798C17.6	GENCODE	819	chr7	-	144004240	144052778	GGGGCTGATCCCTGGGAAAGGCCTGGCTTCCTCTTCCTTCCTGTCCCTGCCCCACCTCCG	intronic antisense	NM_001005287	OR2A1	olfactory receptor 2A1/2A42	+	144015217	144016150	7.70961	9.86718
ASHGA5P053355	0.00939979	0.0390254	4.46163	down	noncoding	ENST00000486094	RP4-798C17.6	GENCODE	819	chr7	-	144004240	144052778	GGGGCTGATCCCTGGGAAAGGCCTGGCTTCCTCTTCCTTCCTGTCCCTGCCCCACCTCCG	natural antisense	NM_005435	ARHGEF5	rho guanine nucleotide exchange factor 5	+	144052488	144077725	7.70961	9.86718
ASHGA5P037587	0.000820332	0.0106917	4.45905	down	noncoding	ENST00000447720	LINC00281	GENCODE	3215	chr22	-	21655278	21679331	CACCGTACACGACATCACTAACGAGGACGCCACACACGACATCGCTAACGAGGATACTGT	intergenic							3.90466	6.0614
ASHGA5P040008	0.019234	0.0595749	4.45716	down	noncoding	uc003hpg.2	WDFY3-AS2	UCSC_knowngene	1739	chr4	+	85887970	85928168	TCTATGGCAGAAAAATGGTCAAGGAATAGGAACTACAACTTCATAAATGAGGAACCAGAA	bidirectional	NM_014991	WDFY3	WD repeat and FYVE domain-containing protein 3	-	85590692	85887544	3.62669	5.78282
ASHGA5P058655	0.00665008	0.0319211	4.45697	down	noncoding	uc022bqs.1	JA040725	UCSC_knowngene	781	chrM	-	7586	15888	AATTGTCTGGGTCGCCTGGTTCTAGGAATAATGGGGGAAGTATGTAGGAGTTGAAGATTA	intergenic							7.66763	9.82369
ASHGA5P022899	0.000672782	0.00972356	4.44568	down	noncoding	NR_023348	GAS8	RefSeq	3267	chr16	+	90089007	90111352	ATGAGCAAGGAGCAGGTGAAGTTGAGTCCTCCCTCTTTCTTCCTTGCCTTTCGCCGGCCA	exon sense-overlapping	NM_001481	GAS8	growth arrest-specific protein 8	+	90089007	90111379	6.02703	8.17943
ASHGA5P022899	0.000672782	0.00972356	4.44568	down	noncoding	NR_023348	GAS8	RefSeq	3267	chr16	+	90089007	90111352	ATGAGCAAGGAGCAGGTGAAGTTGAGTCCTCCCTCTTTCTTCCTTGCCTTTCGCCGGCCA	intronic antisense	NM_001214	C16orf3	uncharacterized protein C16orf3	-	90095315	90096309	6.02703	8.17943
ASHGA5P049031	0.002962	0.0202986	4.44561	down	noncoding	ENST00000570949	RP11-473M20.7	GENCODE	491	chr16	-	3104916	3107214	TCTCCCCATGCTCACCTCCTGCCTCTTGCTCTGCCCAGTGTGAGGACTCAGCCTGGATCA	natural antisense	NM_022468	MMP25	matrix metalloproteinase-25 preproprotein	+	3096681	3110724	8.28553	10.4379
ASHGA5P050310	0.00352739	0.022408	4.44047	down	noncoding	TCONS_00015390	XLOC_006972	LincRNAs identified by Cabili et al	370	chr8	-	1236703	1237178	AAACTAGTTCCCCTCCTAACAAAACCACATACACACACACACGCTGAACCAAAACTAGTT	intergenic							7.05195	9.20267
ASHGA5P044526	0.00113152	0.012333	4.40812	down	noncoding	uc011liu.1	POU5F1P1	UCSC_knowngene	381	chr8	-	128428232	128428613	GAGCTTTGATGTCCTGGGACTTCTCCGGGTTTTGCTCTAGCTTCTCCTTCTCCAGCTTCA	natural antisense	NM_001159542	POU5F1B	putative POU domain, class 5, transcription factor 1B	+	128427856	128429441	4.37088	6.51104
ASHGA5P046074	0.000290656	0.00607742	4.39186	down	noncoding	uc004cov.4	STRF6	UCSC_knowngene	1666	chrM	+	10472	12138	TGTGCTAGTAACCACGTTCTCCTGATCAAATATCACTCTCCTACTTACAGGACTCAACAT	intergenic							10.8699	13.0047
ASHGA5P047138	0.0368208	0.0852267	4.38714	down	noncoding	AI161328		LincRNAs identified by Khalil et al	412	chr2	-	174830570	174830982	TTTTTTGCTTTAAATGCCTGCCTTCAGGGTACGTGAAAGTGGGAGACCGGTTGGAAAACT	intergenic							3.55959	5.69287
ASHGA5P029383	0.016348	0.054664	4.38213	down	noncoding	TCONS_00010258	XLOC_004724	LincRNAs identified by Cabili et al	231	chr5	-	6359188	6362527	TTTGCTTTTTTCGTTTGAAATACCTTTGCAAATCTTTGTCAGCAGGGGCAGGCTGGCAGG	intergenic							3.58266	5.7143
ASHGA5P054974	0.00377373	0.0233228	4.36361	down	noncoding	TCONS_00010239	XLOC_004700	LincRNAs identified by Cabili et al	1175	chr5	-	1045830	1047475	CTCACACACTAACCCACTCATTCACACACTAACCCACTCGTTCACACACCCATTCACACT	intergenic							6.16487	8.2904
ASHGA5P023727	0.000558523	0.0086557	4.35403	down	noncoding	HMlincRNA1613-	HMlincRNA1613	LincRNAs identified by Khalil et al	9863	chrX	-	118619272	118629135	AGGACAGGGAGTGGCCCTCTTACTCCTCCCTTTTTCTTTCTTCCTTAGGTTCTTTTATAT	intergenic							6.15044	8.27279
ASHGA5P047369	0.00551997	0.0290026	4.34923	down	noncoding	ENST00000428915	RP11-291L22.4	GENCODE	934	chr10	+	38742108	38755311	CTCGCCAACAAGGAAAACTTTTAAGTAGAGCAGAACCTGAATAGACAATATATTTCTTTC	intergenic							4.00579	6.12655
ASHGA5P038550	0.00291979	0.0201522	4.34637	down	noncoding	ENST00000483289	RP11-379K17.4	GENCODE	5523	chr3	-	169661771	169684014	AATTATAAATTATAGTGTGTCTCTCCTCTCTTACCAAGGACTAAGGGCTAAAGTATCGAC	bidirectional	NM_003262	SEC62	translocation protein SEC62	+	169684579	169716161	4.91584	7.03565
ASHGA5P022291	0.00168119	0.0151241	4.33449	down	noncoding	NR_046052	THTPA	RefSeq	1150	chr14	+	23982018	24028790	GTATGGTGTGGTCCTCCTTCCCCTTCCCTCTTAGGCATGGGGAGTGGAGCAACAGACGGA	exon sense-overlapping	NM_001126339	THTPA	thiamine-triphosphatase isoform 1	+	24025197	24028790	8.37716	10.493
ASHGA5P022291	0.00168119	0.0151241	4.33449	down	noncoding	NR_046052	THTPA	RefSeq	1150	chr14	+	23982018	24028790	GTATGGTGTGGTCCTCCTTCCCCTTCCCTCTTAGGCATGGGGAGTGGAGCAACAGACGGA	exon sense-overlapping	NM_001256062	THTPA	thiamine-triphosphatase isoform 2	+	24025197	24028790	8.37716	10.493
ASHGA5P022291	0.00168119	0.0151241	4.33449	down	noncoding	NR_046052	THTPA	RefSeq	1150	chr14	+	23982018	24028790	GTATGGTGTGGTCCTCCTTCCCCTTCCCTCTTAGGCATGGGGAGTGGAGCAACAGACGGA	exon sense-overlapping	NM_001256321	THTPA	thiamine-triphosphatase isoform 2	+	24025197	24028790	8.37716	10.493
ASHGA5P022291	0.00168119	0.0151241	4.33449	down	noncoding	NR_046052	THTPA	RefSeq	1150	chr14	+	23982018	24028790	GTATGGTGTGGTCCTCCTTCCCCTTCCCTCTTAGGCATGGGGAGTGGAGCAACAGACGGA	exon sense-overlapping	NM_001256322	THTPA	thiamine-triphosphatase isoform 3	+	24025197	24028790	8.37716	10.493
ASHGA5P022291	0.00168119	0.0151241	4.33449	down	noncoding	NR_046052	THTPA	RefSeq	1150	chr14	+	23982018	24028790	GTATGGTGTGGTCCTCCTTCCCCTTCCCTCTTAGGCATGGGGAGTGGAGCAACAGACGGA	exon sense-overlapping	NM_001256323	THTPA	thiamine-triphosphatase isoform 3	+	24025197	24028790	8.37716	10.493
ASHGA5P022291	0.00168119	0.0151241	4.33449	down	noncoding	NR_046052	THTPA	RefSeq	1150	chr14	+	23982018	24028790	GTATGGTGTGGTCCTCCTTCCCCTTCCCTCTTAGGCATGGGGAGTGGAGCAACAGACGGA	exon sense-overlapping	NM_024328	THTPA	thiamine-triphosphatase isoform 1	+	24025197	24028790	8.37716	10.493
ASHGA5P022291	0.00168119	0.0151241	4.33449	down	noncoding	NR_046052	THTPA	RefSeq	1150	chr14	+	23982018	24028790	GTATGGTGTGGTCCTCCTTCCCCTTCCCTCTTAGGCATGGGGAGTGGAGCAACAGACGGA	intronic antisense	NM_033400	ZFHX2	zinc finger homeobox protein 2	-	23990063	24020858	8.37716	10.493
ASHGA5P022291	0.00168119	0.0151241	4.33449	down	noncoding	NR_046052	THTPA	RefSeq	1150	chr14	+	23982018	24028790	GTATGGTGTGGTCCTCCTTCCCCTTCCCTCTTAGGCATGGGGAGTGGAGCAACAGACGGA	natural antisense	NM_003917	AP1G2	AP-1 complex subunit gamma-like 2	-	24028776	24037279	8.37716	10.493
ASHGA5P041920	0.000442439	0.00759726	4.33438	down	noncoding	ENST00000457116	RP5-991C6.4	GENCODE	471	chr6	-	82434438	82446070	CCGTTCTATCCCATTCCCTGGACCAAATGTTTGCAATATATAACACTTCTTTAAACTTTA	intron sense-overlapping	ENST00000412306	FAM46A	family with sequence similarity 46, member A [Source:HGNC Symbol;Acc:18345]	-	82201155	82461529	4.56658	6.68241
ASHGA5P029338	0.0190712	0.0592588	4.33109	down	noncoding	ENST00000554540	CTD-2644I21.1	GENCODE	466	chr14	-	101054111	101055663	TCCTGAAGCCACCTTCCCTTCCTGAGAGCTCCTTGGGGAGAAGGCAAGCCCTGGAAGCCA	intergenic							7.25231	9.36704
ASHGA5P030877	0.000115406	0.00369499	4.31248	down	noncoding	ENST00000563192	RP11-304L19.5	GENCODE	342	chr16	-	2204797	2205359	AGGTGGGCGCTGTGTCTATTGAAGTGCTTAGCAATAAAGAAAGGTAGTGAGTTGATTCGG	bidirectional	NM_032271	TRAF7	E3 ubiquitin-protein ligase TRAF7	+	2205798	2228130	6.65561	8.76413
ASHGA5P034525	0.017656	0.0569313	4.29918	down	noncoding	TCONS_00003833	XLOC_001641	LincRNAs identified by Cabili et al	625	chr2	+	121334544	121335384	GGCTGGCTAGGTTGACTTTAAATGTCAAGCCAGAAAATAAATATTGAAAATTCAACTGCA	intergenic							4.58223	6.68629
ASHGA5P044759	8.16764e-05	0.00304914	4.29359	down	noncoding	ENST00000517292	RP11-317N12.1	GENCODE	272	chr8	+	33613294	33653954	CTTTATTTGCTTTGCTGTCATGGTATCCTTCCCATTCCACTGGCTTCCAGCACATATGTG	intergenic							4.50349	6.60567
ASHGA5P027744	0.00077061	0.01032	4.28359	down	noncoding	TCONS_00012771	XLOC_005807	LincRNAs identified by Cabili et al	416	chr6	-	112697489	112717623	AATGATCAAGAACATCCCACACACAACACCGGGCAATGATACATCTTCATGTATTTCCTG	intergenic							3.89732	5.99614
ASHGA5P038052	0.00373658	0.0231397	4.2747	down	noncoding	TCONS_00024285	XLOC_011677	LincRNAs identified by Cabili et al	5246	chr16	+	24715880	24721546	ACTCGGCTATTCCACTTCGATGATTCTCTGTCACAGGTGTCTTAAATACATGAACAAAGG	intergenic							3.85502	5.95084
ASHGA5P018100	0.020044	0.0608796	4.27349	down	noncoding	ENST00000449448	AC007092.1	GENCODE	682	chr2	+	58655519	59231127	CCCTGGCCGGGGACTTACCAATTTGGGATTCTTCCAGGAGCTGAAAACTGATTGCAAATA	intergenic							3.22135	5.31676
ASHGA5P014616	0.00109503	0.012107	4.26912	down	noncoding	ENST00000411839	RP11-128M1.1	GENCODE	536	chr20	+	2187872	2193797	CCGGGCTCTATCCGCCAGCCCACGAGAAGTGACGCAGGAGCACCATTGAAGGAGAATTAG	intergenic							2.74476	4.8387
ASHGA5P054917	0.000321222	0.00641124	4.25513	down	noncoding	ENST00000537024	SNHG1	GENCODE	532	chr11	-	62621018	62622951	AAGTAGGCAGTTTCTATGATGAATCAAACTAGCTCACTATGACCGACAGTGAAAATACAT	bidirectional	NM_001012662	SLC3A2	4F2 cell-surface antigen heavy chain isoform b	+	62623483	62656355	5.03969	7.12889
ASHGA5P054917	0.000321222	0.00641124	4.25513	down	noncoding	ENST00000537024	SNHG1	GENCODE	532	chr11	-	62621018	62622951	AAGTAGGCAGTTTCTATGATGAATCAAACTAGCTCACTATGACCGACAGTGAAAATACAT	bidirectional	NM_001012664	SLC3A2	4F2 cell-surface antigen heavy chain isoform e	+	62623483	62656355	5.03969	7.12889
ASHGA5P054917	0.000321222	0.00641124	4.25513	down	noncoding	ENST00000537024	SNHG1	GENCODE	532	chr11	-	62621018	62622951	AAGTAGGCAGTTTCTATGATGAATCAAACTAGCTCACTATGACCGACAGTGAAAATACAT	bidirectional	NM_002394	SLC3A2	4F2 cell-surface antigen heavy chain isoform c	+	62623483	62656355	5.03969	7.12889
ASHGA5P057044	0.00466018	0.0262758	4.2511	down	noncoding	TCONS_00012235	XLOC_005792	LincRNAs identified by Cabili et al	453	chr6	-	104785423	104786550	AATTTCTGAGGCTTGGCAGGGTGGCTTCTTGATGTTGAAGTGCTGAAAATGCTGATTTTT	intergenic							3.83996	5.9278
ASHGA5P028390	0.002421	0.0181644	4.24179	down	noncoding	ENST00000443685	RP11-662M24.1	GENCODE	527	chr12	+	131143285	131145039	ATTCTCTACCCTTCTCTCTGGAATCTCATGGGAATCTCCTCTCGGTGACTGTTCTTATTG	intronic antisense	ENST00000536002	RIMBP2	RIMS binding protein 2 [Source:HGNC Symbol;Acc:30339]	-	130916203	131200826	4.86561	6.95028
ASHGA5P056553	0.0139706	0.049486	4.24089	down	noncoding	TCONS_00006099	XLOC_002710	LincRNAs identified by Cabili et al	709	chr3	+	75485927	75492775	AATGCTAGATCAGATAGGGTCTCTCTCTCTGCCACCCAGGCCAGAGTGCAGTTGACGCAG	intergenic							6.6555	8.73987
ASHGA5P055007	0.00242959	0.0181845	4.23824	down	noncoding	TCONS_00009904	XLOC_004316	LincRNAs identified by Cabili et al	1445	chr5	+	24292126	24322125	TGCCCTCCCTCTTTTGGTAAGCAAAACACTGATGCTTATGACATCTTCCTTTTCTTTGGT	intergenic							7.28737	9.37083
ASHGA5P041904	0.00910371	0.0381175	4.23193	down	noncoding	ENST00000511053	KHDC1P1	pseudogene	508	chr6	-	73918805	73919803	CCTTTCCCTTACCAAGTGATTGGTCGTTAGGTATTCTATTTGAGTTCACTCTATTCGTAA								2.85304	4.93435
ASHGA5P046510	0.00169064	0.0151698	4.21003	down	noncoding	uc004dgq.1	AX747333	UCSC_knowngene	2212	chrX	+	46319732	46321944	AGGCTTCCTCCCTGCCTCTGTTTCATCTATGAGTGTCTTGAGTGTCTTAAGTGTCACTTT	intron sense-overlapping	NM_001129898	ZNF673	protein ZNF673 isoform 1	+	46306623	46334074	7.54972	9.62355
ASHGA5P046510	0.00169064	0.0151698	4.21003	down	noncoding	uc004dgq.1	AX747333	UCSC_knowngene	2212	chrX	+	46319732	46321944	AGGCTTCCTCCCTGCCTCTGTTTCATCTATGAGTGTCTTGAGTGTCTTAAGTGTCACTTT	intron sense-overlapping	NM_001129899	ZNF673	protein ZNF673 isoform 3	+	46306623	46334074	7.54972	9.62355
ASHGA5P046510	0.00169064	0.0151698	4.21003	down	noncoding	uc004dgq.1	AX747333	UCSC_knowngene	2212	chrX	+	46319732	46321944	AGGCTTCCTCCCTGCCTCTGTTTCATCTATGAGTGTCTTGAGTGTCTTAAGTGTCACTTT	intron sense-overlapping	NM_001129900	ZNF673	protein ZNF673 isoform 4	+	46306623	46334074	7.54972	9.62355
ASHGA5P046510	0.00169064	0.0151698	4.21003	down	noncoding	uc004dgq.1	AX747333	UCSC_knowngene	2212	chrX	+	46319732	46321944	AGGCTTCCTCCCTGCCTCTGTTTCATCTATGAGTGTCTTGAGTGTCTTAAGTGTCACTTT	intron sense-overlapping	NM_017776	ZNF673	protein ZNF673 isoform 2	+	46306623	46334074	7.54972	9.62355
ASHGA5P037775	0.00597342	0.0300387	4.20799	down	noncoding	TCONS_00024430	XLOC_011747	LincRNAs identified by Cabili et al	1158	chr16	+	62145897	62164547	ATTCTGCTGCCTTCCTTTCTTCACTGGTGTTCTTTCCCAAACAACTCGGGAATAAATTCC	intergenic							7.65268	9.72581
ASHGA5P035583	0.00361019	0.0227388	4.20286	down	noncoding	TCONS_00004331	XLOC_002204	LincRNAs identified by Cabili et al	534	chr2	-	92176818	92179491	ATACTTAGATTGTAACCCATAATGTAGATATTATTTTTCCTTCAACTCTTAAGAATATTC	intergenic							2.81655	4.88792
ASHGA5P040516	5.71316e-05	0.00254498	4.1951	down	noncoding	ENST00000507514	CTD-2384B11.2	GENCODE	600	chr5	-	75987263	76012040	CTCCAGCCATCATCATCAATGTATTAAACAGGAACACTGAGTTAAAAATAAAAGCTTTGG	intronic antisense	NM_006633	IQGAP2	ras GTPase-activating-like protein IQGAP2	+	75699148	76003957	3.209	5.2777
ASHGA5P040516	5.71316e-05	0.00254498	4.1951	down	noncoding	ENST00000507514	CTD-2384B11.2	GENCODE	600	chr5	-	75987263	76012040	CTCCAGCCATCATCATCAATGTATTAAACAGGAACACTGAGTTAAAAATAAAAGCTTTGG	natural antisense	NM_001992	F2R	proteinase-activated receptor 1 precursor	+	76011867	76031595	3.209	5.2777
ASHGA5P023914	0.00367547	0.0229996	4.18683	down	noncoding	HMlincRNA933+	HMlincRNA933	LincRNAs identified by Khalil et al	21349	chr20	+	48363997	48385346	GGTTTCTCTTTTTCATCTCACTGCTCTGTCTCTGATGTGGCTTCATTCTCAGAGGATTGT	intergenic							5.32946	7.39532
ASHGA5P040144	0.0185171	0.0583668	4.16978	down	noncoding	ENST00000447407	BX571672.1	GENCODE	655	chr1	+	143119060	143231756	GACATTCTTCCCAGTGTCTCAATATGTTTTGGCATCTTTCAGTAAAAATCTTCAAGTTTG	intergenic							5.00805	7.06802
ASHGA5P055873	0.0109882	0.0430058	4.16478	down	noncoding	ENST00000546734	CTD-2314B22.1	GENCODE	787	chr14	+	19606384	19643377	ATCCTTCTCCATCCAGTATTGGGGGTCTTCCTCCTCCATCCAGGACTTGGGGGTCATCCT	intergenic							6.92209	8.98033
ASHGA5P036467	0.00234754	0.017867	4.15698	down	noncoding	ENST00000420563	AC053503.4	GENCODE	1598	chr2	+	220253217	220268355	AGACGCACACACCACACAAATATTATTGTTCCTCAACAATTTACACATTCTGAAATTGGA	intronic antisense	ENST00000434339	DNPEP	aspartyl aminopeptidase [Source:HGNC Symbol;Acc:2981]	-	220250380	220264729	5.82853	7.88407
ASHGA5P036467	0.00234754	0.017867	4.15698	down	noncoding	ENST00000420563	AC053503.4	GENCODE	1598	chr2	+	220253217	220268355	AGACGCACACACCACACAAATATTATTGTTCCTCAACAATTTACACATTCTGAAATTGGA	intronic antisense	ENST00000457935	DNPEP	aspartyl aminopeptidase [Source:HGNC Symbol;Acc:2981]	-	220246719	220264744	5.82853	7.88407
ASHGA5P036467	0.00234754	0.017867	4.15698	down	noncoding	ENST00000420563	AC053503.4	GENCODE	1598	chr2	+	220253217	220268355	AGACGCACACACCACACAAATATTATTGTTCCTCAACAATTTACACATTCTGAAATTGGA	intronic antisense	ENST00000523282	DNPEP	aspartyl aminopeptidase [Source:HGNC Symbol;Acc:2981]	-	220238915	220264729	5.82853	7.88407
ASHGA5P036467	0.00234754	0.017867	4.15698	down	noncoding	ENST00000420563	AC053503.4	GENCODE	1598	chr2	+	220253217	220268355	AGACGCACACACCACACAAATATTATTGTTCCTCAACAATTTACACATTCTGAAATTGGA	natural antisense	ENST00000373972	DNPEP	aspartyl aminopeptidase [Source:HGNC Symbol;Acc:2981]	-	220238915	220253598	5.82853	7.88407
ASHGA5P036467	0.00234754	0.017867	4.15698	down	noncoding	ENST00000420563	AC053503.4	GENCODE	1598	chr2	+	220253217	220268355	AGACGCACACACCACACAAATATTATTGTTCCTCAACAATTTACACATTCTGAAATTGGA	natural antisense	ENST00000519905	DNPEP	aspartyl aminopeptidase [Source:HGNC Symbol;Acc:2981]	-	220251408	220264703	5.82853	7.88407
ASHGA5P015300	0.000841369	0.0107903	4.15526	down	noncoding	NR_046479	FKBP14	RefSeq	4934	chr7	-	30050198	30066417	CTCCTTATTTCACTCCACGTAAAATTCCCCCAGAAAGTACACTGATATTTAATATTGATC	exon sense-overlapping	NM_017946	FKBP14	peptidyl-prolyl cis-trans isomerase FKBP14 precursor	-	30050198	30066417	5.52319	7.57813
ASHGA5P049385	0.00102272	0.011657	4.15518	down	noncoding	TCONS_00021990	XLOC_010590	LincRNAs identified by Cabili et al	431	chr13	-	45462117	45464410	ATTTTGGGGCATAAGTCCAACTGCCTAACTTCCCTTCTTCCTGCCTGTTTTCCTGAAGTT	intergenic							5.40529	7.4602
ASHGA5P047252	0.00924271	0.0385474	4.15497	down	noncoding	ENST00000420825	RP1-251M9.2	GENCODE	537	chr10	+	11002113	11012779	CTTGTAGAAATCCTTGACTCACCTCTTCATTCCAAATTAGCAAAATGAGCAACATGTAAT	intergenic							3.94394	5.99878
ASHGA5P048345	0.00592676	0.029914	4.15353	down	noncoding	TCONS_00013900	XLOC_006532	LincRNAs identified by Cabili et al	338	chr7	-	98283481	98286896	AAGTCAAGAAATCCTCCTTCCTGCTTGTACCAGTTGGCAGTGGGTTTTCTGGCATTTGTA	intergenic							4.04716	6.10149
ASHGA5P030854	0.000163561	0.00451556	4.1521	down	noncoding	ENST00000563223	LA16c-390E6.3	GENCODE	307	chr16	-	1517673	1522685	GGTTTCCTGTCTGTCTTTGCAAATAGAAGAGTTGATTTTTTGGGAAATAATCTGTTGATC	intron sense-overlapping	NM_001114331	CLCN7	H(+)/Cl(-) exchange transporter 7 isoform b	-	1494933	1525085	2.75773	4.81157
ASHGA5P030854	0.000163561	0.00451556	4.1521	down	noncoding	ENST00000563223	LA16c-390E6.3	GENCODE	307	chr16	-	1517673	1522685	GGTTTCCTGTCTGTCTTTGCAAATAGAAGAGTTGATTTTTTGGGAAATAATCTGTTGATC	intron sense-overlapping	NM_001287	CLCN7	H(+)/Cl(-) exchange transporter 7 isoform a	-	1494933	1525085	2.75773	4.81157
ASHGA5P030003	0.000458543	0.00777247	4.15165	down	noncoding	ENST00000558185	RP11-552E10.1	GENCODE	472	chr15	-	47896076	47898549	CACATCACTCCATCTCAGGGGGTCAGAAAATAAATTAAATGTTAGGAAAAACAGAAAAGA	intronic antisense	NM_001198999	SEMA6D	semaphorin-6D isoform 1 precursor	+	47476402	48066420	3.56303	5.61672
ASHGA5P027340	0.0107897	0.0425541	4.1465	down	noncoding	ENST00000428945	RP4-680D5.2	GENCODE	2845	chr1	-	15912630	15930121	ACTTCTTTCTTTCCACGTGTGTTTTTCTTTCCCCTTAGAAATAAAGAGGATGTAACAGGT	intergenic							2.85262	4.90451
ASHGA5P053536	0.000179259	0.00474985	4.1377	down	noncoding	TCONS_00012628	XLOC_005544	LincRNAs identified by Cabili et al	807	chr6	+	168631120	168632020	CTCTGTGTGTTCCCACTGAGTTGGTCTTTGTTTATTTTCACACTTAAATTACACACTATA	intergenic							2.92754	4.97637
ASHGA5P016395	0.000989536	0.0115948	4.11552	down	noncoding	ENST00000430057	WWC3-AS1	GENCODE	578	chrX	-	9992881	10006694	GGCGCGGTGGCTCACGCCTGTAAATTTTATAGTATCTCAATTTTTTAAAAATGGAAATAA	intronic antisense	NM_015691	WWC3	protein WWC3	+	9983794	10112518	8.73711	10.7782
ASHGA5P029195	0.0250524	0.0692239	4.1144	down	noncoding	ENST00000555850	RP11-862P13.1	GENCODE	514	chr14	-	67435754	67436533	GATACTTCACTGTCATAAAGCAAGAGGAGTGAAAATTATTCCTCATTTCAGTCAGATTTC	intronic antisense	NM_001024218	GPHN	gephyrin isoform 2	+	66974124	67648525	3.1729	5.21358
ASHGA5P029195	0.0250524	0.0692239	4.1144	down	noncoding	ENST00000555850	RP11-862P13.1	GENCODE	514	chr14	-	67435754	67436533	GATACTTCACTGTCATAAAGCAAGAGGAGTGAAAATTATTCCTCATTTCAGTCAGATTTC	intronic antisense	NM_020806	GPHN	gephyrin isoform 1	+	66974124	67648525	3.1729	5.21358
ASHGA5P040341	0.00157871	0.0145573	4.11355	down	noncoding	ENST00000563101	CTD-2165H16.4	GENCODE	2797	chr5	-	14661916	14664713	CCACAGAACTCCGGGGGTATTGTTTTCTCCTTTAATTTTACTTGAAAAAGTAATAAATGC	bidirectional	NM_138348	FAM105B	protein FAM105B	+	14664782	14699842	3.27556	5.31594
ASHGA5P029841	0.00400314	0.0241894	4.10286	down	noncoding	uc001yrr.3	BC033241	UCSC_knowngene	2014	chr14	+	105998191	106000654	GACCCTTCATCTTCCTTTCAGAACACACTCACATTTTCTATAGGAAAACAGCCTCATAAT	intergenic							7.21048	9.24712
ASHGA5P046506	0.0344049	0.0822097	4.09485	down	noncoding	ENST00000435394	RP11-245M24.1	GENCODE	2214	chrX	+	45364632	45382889	GCCAGTCCCTCACATGTTGGGGTTCACTAATATCTTCTTCTCTTCTTTCTTATGAGTCTT	intergenic							5.07259	7.10641
ASHGA5P022796	0.00014896	0.00430582	4.08401	down	noncoding	ENST00000565416	RP11-941F15.1	GENCODE	588	chr15	-	74211501	74220281	GCACCGGCAGGAGCTCCTGCCTGCCTGGATGAAGAGGAGGTCAAGACTTTGTCCCCCACT	natural antisense	NM_005576	LOXL1	lysyl oxidase homolog 1 preproprotein	+	74218788	74244478	4.33441	6.3644
ASHGA5P054399	0.000488726	0.00813311	4.08141	down	noncoding	ENST00000458682	LINC00202	GENCODE	868	chr10	-	27220134	27223852	TTGAAAATTCTTTGCTCACTCTTCTTTTCTCACTTCCTCCCTCTCAGGACCTATAAAAGG	intergenic							6.06088	8.08994
ASHGA5P048840	0.00257874	0.0187973	4.07524	down	noncoding	uc010bmo.1	AGSK1	UCSC_knowngene	2067	chr15	-	83144202	83182928	CTCCCAAGAACAGGGAGATAAACACCACCATCATCTGAGAGCCGGGAAGGGGAAGGCGTA	intergenic							5.18929	7.21617
ASHGA5P057347	0.0099217	0.0404456	4.07407	down	noncoding	TCONS_00016233	XLOC_007615	LincRNAs identified by Cabili et al	835	chr9	+	139543084	139548533	GGCTGGCTCTGAAAATTATGAACTCTCTTTTCCTTAAAATAAAGGCTCTAAAATTGTGTG	intergenic							6.32576	8.35223
ASHGA5P035623	0.0181834	0.0579368	4.05343	down	noncoding	uc002vvo.1	AF279775	UCSC_knowngene	723	chr2	-	235791851	235797446	GAAAGTGTTGAAAATTGACATCTATGTTTACATATCACAGCAACACAAAGTGCCAGCAAA	intergenic							3.05903	5.07817
ASHGA5P026123	0.000214684	0.00511826	4.04236	down	noncoding	TCONS_00014317	XLOC_006476	LincRNAs identified by Cabili et al	337	chr7	-	65564507	65565273	ACAGACCTGAGCCAGGGAGCCTGGCTGTTTCTTCCTCCTACTCCTCCTCTACAGGTGTAA	intronic antisense	ENST00000450043	AC068533.7		+	65552755	65617228	5.5979	7.6131
ASHGA5P050170	0.00168538	0.0151471	4.03588	down	noncoding	TCONS_00018656	XLOC_009007	LincRNAs identified by Cabili et al	207	chr10	-	134824750	134825301	CACACTAACACACATCACACGTGCTAAAACACATCACACAAGCACACATCACACACACTA	intergenic							5.54395	7.55683
ASHGA5P029724	0.00438967	0.025377	4.03344	down	noncoding	ENST00000554631	DICER1-AS1	GENCODE	1702	chr14	+	95623981	95646263	GTGGGAATTAAATAAGTGGCTGGCTTAAAGAACATCTTCTTAATTTATCCCCAAATGTAG	natural antisense	ENST00000526495	DICER1	dicer 1, ribonuclease type III [Source:HGNC Symbol;Acc:17098]	-	95552564	95624347	4.03733	6.04934
ASHGA5P029724	0.00438967	0.025377	4.03344	down	noncoding	ENST00000554631	DICER1-AS1	GENCODE	1702	chr14	+	95623981	95646263	GTGGGAATTAAATAAGTGGCTGGCTTAAAGAACATCTTCTTAATTTATCCCCAAATGTAG	natural antisense	ENST00000527865	DICER1	dicer 1, ribonuclease type III [Source:HGNC Symbol;Acc:17098]	-	95599756	95624347	4.03733	6.04934
ASHGA5P055909	0.00641518	0.0312088	4.00794	down	noncoding	NR_040448	SLC7A7	RefSeq	2566	chr14	-	23242431	23285101	TCCTCCCTTTCTTAAATGCTTGGGGTGAGAGAGAAGAGAGGCTAGGGTGGGGCATGGAGG	exon sense-overlapping	NM_001126105	SLC7A7	Y+L amino acid transporter 1	-	23242431	23285107	5.35428	7.35714
ASHGA5P055909	0.00641518	0.0312088	4.00794	down	noncoding	NR_040448	SLC7A7	RefSeq	2566	chr14	-	23242431	23285101	TCCTCCCTTTCTTAAATGCTTGGGGTGAGAGAGAAGAGAGGCTAGGGTGGGGCATGGAGG	exon sense-overlapping	NM_001126106	SLC7A7	Y+L amino acid transporter 1	-	23242431	23289020	5.35428	7.35714
ASHGA5P040285	0.00489005	0.026936	4.00765	down	noncoding	TCONS_00022761	XLOC_011044	LincRNAs identified by Cabili et al	725	chr14	-	61108285	61109382	AGACACCTCCTGTCTCCTTCTTCGCTTCCTGGGGTCTTGGCTTTGGTTTTCGGACCCAAA	intergenic							6.89735	8.9001
ASHGA5P031152	0.00541873	0.0287327	3.98729	down	noncoding	ENST00000570024	AC140542.2	GENCODE	1325	chr16	-	47883224	47921041	TTCTGTCCTTCTCTCCTTTTAGATTGTAAGCTACCCAAAGTCCATCTCCATGGGTTTTTT	intergenic							4.83838	6.83379
ASHGA5P035996	0.0148186	0.0514889	3.96948	down	noncoding	TCONS_00027541	XLOC_013072	LincRNAs identified by Cabili et al	495	chr19	+	40018979	40019553	AACATTTAAAACTTAAAACTATTCATGAGTGTGGGGGGAAGGTAGGGTGCAACCTGAGGC	intergenic							4.95781	6.94676
ASHGA5P041284	0.00172207	0.0153127	3.96787	down	noncoding	uc003koo.1	BC034788	UCSC_knowngene	1908	chr5	+	108065630	108067538	TTTTTTGTTTTTTGTTTTTGATACAGAGTCTTGCTCTGTCACCCAGCCTGGAGAGCAGTG	intergenic							5.28356	7.27192
ASHGA5P058935	0.0159666	0.0537786	3.94482	down	noncoding	uc.329-	uc.329	UCR	307	chr11	-	32197991	32198298	CCTGGCTGGCTAATGGGCTTATCAAAATTCATGATGTAATAAGAAGGCCGACAAGTGCAT	intergenic							5.37008	7.35004
ASHGA5P019432	0.000425854	0.00751034	3.94452	down	noncoding	ENST00000484046	TM4SF1-AS1	GENCODE	488	chr3	+	149096005	149104368	CTGTTTACAGAAAGGTTGGGGTGAAACTCTCCACTCCTGCTTTCATACCATTTGAAGTTC	bidirectional	NM_014220	TM4SF1	transmembrane 4 L6 family member 1	-	149086804	149095568	4.89503	6.87488
ASHGA5P028081	0.0130034	0.0474494	3.94047	down	noncoding	ENST00000556850	RP11-474N8.5	GENCODE	459	chr12	+	57390042	57392225	GGTCTGTCTCCTCTGTGGATTCACGCATGTATCAACCTCATTAAACTATGCCAAACTTTT	exon sense-overlapping	NM_007264	GPR182	G-protein coupled receptor 182	+	57388354	57390469	5.74229	7.72066
ASHGA5P030356	0.00274108	0.019309	3.93141	down	noncoding	ENST00000566797	RP11-580I1.3	GENCODE	849	chr15	+	24686273	24693114	TCTATCTTCCTTCTCCATGGGATCTTTGAGCCATAATTTATAAAATCACCTCTACATCTC	intergenic							3.1921	5.16715
ASHGA5P035794	0.00362958	0.0228453	3.92103	down	noncoding	NR_027098	LINC00486	RefSeq	1991	chr2	+	33050509	33154206	GTCATGTTTCATCTTTCTAGAATTCATTTTTCACATCTTCATTCACTGGGATTCTGGACC	intergenic							2.83847	4.80971
ASHGA5P032242	0.005793	0.0296269	3.92046	down	noncoding	uc002gua.4	CCDC144B	UCSC_knowngene	8695	chr17	-	18441114	18528930	TGCGGTGGCTGCTTGGCTTGGCGGTGGTCGCTTGGCTTGGCGTGGCAGTGATCGCTTGGC	intergenic							6.35069	8.32171
ASHGA5P025762	9.93537e-05	0.00347023	3.91878	down	noncoding	NR_033958	LOC283440	RefSeq	571	chr12	-	2870365	2880835	GGCATTGAAGGTGTCCCTGCCGGTACTCATAAACCTTCTATGCCAACCAAGCCACATCTC	intergenic							3.03235	5.00276
ASHGA5P041351	0.00104113	0.0117805	3.91583	down	noncoding	ENST00000511631	RP11-395P13.4	GENCODE	606	chr5	+	124712526	124713132	TGAGTTTCTGGCTGTCTCTGAGGAATAGTTCCATTAACTAAGTCTGAATGATTACTTGTA	intergenic							2.70128	4.67059
ASHGA5P037294	0.00154791	0.0144001	3.91453	down	noncoding	NR_026812	RUNX1-IT1	RefSeq	1502	chr21	-	36410232	36411723	CCATGTTGAAGTGTAAACTCCACTCAGCTCCAGGAGGAATCGTGTTTTCTTTATCACCAG	intron sense-overlapping	NM_001754	RUNX1	runt-related transcription factor 1 isoform AML1c	-	36160097	36421595	4.82404	6.79288
ASHGA5P043069	0.00936424	0.0388953	3.90402	down	noncoding	ENST00000412800	GS1-278J22.2	GENCODE	437	chr7	-	53626906	53635942	CTCCTCCCCCAAGTGTGTAATCATAGCCTTTAGTTTTTACAAAACTTTCATTACTTTAAG	intergenic							8.36803	10.333
ASHGA5P042020	0.00355644	0.0225388	3.88505	down	noncoding	ENST00000432121	RP11-624M8.1	GENCODE	524	chr6	-	126041488	126070332	GTCCATTGGTGCTCTCATACTTTTTTCCCTCTCTCTTCCTGTTAGAATGTGCTTCCAGGA	intronic antisense	ENST00000368365	HEY2	hairy/enhancer-of-split related with YRPW motif 2 [Source:HGNC Symbol;Acc:4881]	+	126068809	126082415	5.65784	7.61578
ASHGA5P058562	0.000613656	0.00923087	3.88461	down	noncoding	uc010jpp.1	LINC00340	UCSC_knowngene	1226	chr6	+	21665002	21910006	GTCCTATATTCCTTTTCATTCCTGTCGAGTACCCTCAGGTGACTACAGATGTGTTAACAC	intergenic							3.13123	5.089
ASHGA5P056199	0.0185227	0.0583668	3.8828	down	noncoding	TCONS_00000959	XLOC_000218	LincRNAs identified by Cabili et al	297	chr1	+	59180599	59181440	TTCATCCATCCTGCAGCTTCTACATTGTTCTTCATCTCTGGGAAATCAGTGACCCATGGA	intergenic							4.42954	6.38664
ASHGA5P052366	0.00071415	0.00995678	3.86137	down	noncoding	ENST00000506485	AC010226.4	GENCODE	564	chr5	+	114937753	114938902	GCACAGTACAGGTAAAGCTAAGAGTTATTTCCTCCTTCTCTTTCCCCATCCAACAACAGG	intronic antisense	NM_001164468	TMED7-TICAM2	TRAM adaptor with GOLD domain isoform 1 precursor	-	114914338	114961876	5.42239	7.3715
ASHGA5P052366	0.00071415	0.00995678	3.86137	down	noncoding	ENST00000506485	AC010226.4	GENCODE	564	chr5	+	114937753	114938902	GCACAGTACAGGTAAAGCTAAGAGTTATTTCCTCCTTCTCTTTCCCCATCCAACAACAGG	intronic antisense	NM_001164469	TMED7-TICAM2	TRAM adaptor with GOLD domain isoform 2 precursor	-	114914338	114961876	5.42239	7.3715
ASHGA5P052366	0.00071415	0.00995678	3.86137	down	noncoding	ENST00000506485	AC010226.4	GENCODE	564	chr5	+	114937753	114938902	GCACAGTACAGGTAAAGCTAAGAGTTATTTCCTCCTTCTCTTTCCCCATCCAACAACAGG	natural antisense	NM_021649	TICAM2	TIR domain-containing adapter molecule 2	-	114914338	114938176	5.42239	7.3715
ASHGA5P039181	0.0223749	0.0642337	3.85222	down	noncoding	uc003fky.3	BC036236	UCSC_knowngene	2906	chr3	+	181670166	181721828	CAAAGGCTTACTTGAGTTTTAATGCTTTCGGGACTTCAAATGCTTTTCTATCTTCCTAAT	intergenic							3.23294	5.17863
ASHGA5P054175	0.00221128	0.0173534	3.84951	down	noncoding	ENST00000519624	RP11-459E5.1	GENCODE	292	chr8	+	22602130	22603250	TTTGTCCTTCTGCCTCTCCTCTGCCTGAGAGCAAGGTGAGAGGATCCCGTTCCTGTTCTC	intronic antisense	NM_144962	PEBP4	phosphatidylethanolamine-binding protein 4 precursor	-	22570764	22785421	5.42932	7.37399
ASHGA5P048056	0.0078384	0.0349	3.84932	down	noncoding	ENST00000526225	CTD-2210P24.3	GENCODE	166	chr11	-	45772656	45773124	CTCTTCCTCCACCTCTGCCACAGGGCTCCAGCTTCCCTCTGGGGGCACCACTGTTCTTAG	intergenic							7.5229	9.46751
ASHGA5P032705	0.018556	0.0584358	3.83787	down	noncoding	ENST00000431729	RP11-191N8.2	GENCODE	423	chr1	-	222001007	222014008	GGCAGATCACCAAAGAACTCAAGATGTACTGATATTTTGCCAGTTTCCTTCATCAACAAC	intergenic							4.53091	6.47121
ASHGA5P031855	0.00615955	0.030635	3.8229	down	noncoding	TCONS_00006565	XLOC_003194	LincRNAs identified by Cabili et al	338	chr3	-	102379500	102382168	ATATGGCCAACTTGCCACCTCTCTCTTCTCCTTGTTCCTGGAACATGTTGCTAATTGCTA	intergenic							5.87787	7.81254
ASHGA5P015646	0.000381129	0.00695919	3.81419	down	noncoding	ENST00000422194	RP11-402P6.9	GENCODE	697	chrX	-	70882844	70885603	AGGGCTGTCCTCGGTGCATCCGGCTGCAGAGGGAAATTGAGGACCTTAGAGACCAACTAG	intergenic							2.50092	4.4323
ASHGA5P016557	0.0185854	0.0584358	3.80852	down	noncoding	ENST00000431656	LINC00459	GENCODE	376	chr13	+	62897789	62902966	CTTGATTAAGGTCGCAAAAGAAGAGACAACTATACATTTTGTGATGCTGAAGGGAAATGT	intergenic							3.41728	5.34651
ASHGA5P056913	0.00035159	0.00670118	3.80566	down	noncoding	TCONS_00010462	XLOC_004983	LincRNAs identified by Cabili et al	387	chr5	-	124329348	124331780	AAAGGATAGTCCATCTGGATGTTTCTTTCTTTCTCCTAACTGTGACCTCAGCCTGCTCCA	intergenic							2.70605	4.6342
ASHGA5P029641	2.80321e-05	0.00164639	3.80286	down	noncoding	ENST00000553621	RP6-91H8.1	GENCODE	721	chr14	+	71679349	71684933	GTGTCCTTCCCTATACACTTCATTTGCTTATCCCCTTATTCATTCAACAAAGGAGTTCCT	intergenic							5.2794	7.20649
ASHGA5P026288	0.00611779	0.0305426	3.80221	down	noncoding	ENST00000478367	WT1-AS	GENCODE	561	chr11	+	32459168	32459872	GAGGAGGTTATCTGAAGGGAGGCTGGCTTGAATGTGAGTCGTTGTGTTTGTGAAACCCAG	intergenic							3.97539	5.90223
ASHGA5P058688	0.0102006	0.0411639	3.79973	down	noncoding	uc.86+	uc.86	UCR	340	chr2	+	157660109	157660449	TAATTAGGAGGCCCTTCCCTTCCAGAGTTACTATTTCTATTGACATTTTCCATGCATGAG	intergenic							7.76609	9.69198
ASHGA5P057810	0.000823699	0.0106917	3.79374	down	noncoding	TCONS_00022118	XLOC_010728	LincRNAs identified by Cabili et al	430	chr13	-	112810022	112814358	GCGGAAAATTACTGTTCTGTCTGTTTCATCTGCCTATTTTATTCTTTCTCAGAACTCTGC	intergenic							3.27332	5.19694
ASHGA5P015542	0.00986376	0.0403273	3.79126	down	noncoding	ENST00000421181	AC080094.1	GENCODE	201	chr2	+	17151300	17155764	GTCTCAAAAGTTCTCATTCTTCTCCTTCCTGCTGCCACATGACAAAGGATGTGTTTGACT	intergenic							6.03391	7.95659
ASHGA5P058913	0.011875	0.044914	3.78211	down	noncoding	uc.156-	uc.156	UCR	213	chr5	-	76935418	76935631	TGTTGTTGGCTGGCTCTGAAAAATCAGAACATTAGAAATGGTTCGCTTCACTTGTGCAAA	intron sense-overlapping	ENST00000306422	OTP	orthopedia homeobox [Source:HGNC Symbol;Acc:8518]	-	76924537	76935513	4.94119	6.86038
ASHGA5P015898	0.00019428	0.00493755	3.78108	down	noncoding	ENST00000424523	AC002454.1	GENCODE	406	chr7	+	92484222	92546465	CCACAGCACACACTGCAAGCTATTTGGCATATGAAGGTCTTGACCTGAGAAAACCATCTT	intergenic							3.50321	5.42201
ASHGA5P048968	0.00166894	0.0150732	3.77988	down	noncoding	uc010bra.2	AL360260	UCSC_knowngene	2037	chr16	+	767618	769655	CCTGGTGTGGACGGGAGAGGAGTGGGGAGGTTGGGCGCAGTGGCTCACGCCTGTAATCCC	exon sense-overlapping	ENST00000568223	METRN	meteorin, glial cell differentiation regulator [Source:HGNC Symbol;Acc:14151]	+	765114	769499	7.79664	9.71498
ASHGA5P048968	0.00166894	0.0150732	3.77988	down	noncoding	uc010bra.2	AL360260	UCSC_knowngene	2037	chr16	+	767618	769655	CCTGGTGTGGACGGGAGAGGAGTGGGGAGGTTGGGCGCAGTGGCTCACGCCTGTAATCCC	intron sense-overlapping	ENST00000445361	MSLN	mesothelin [Source:HGNC Symbol;Acc:7371]	+	693261	818865	7.79664	9.71498
ASHGA5P048968	0.00166894	0.0150732	3.77988	down	noncoding	uc010bra.2	AL360260	UCSC_knowngene	2037	chr16	+	767618	769655	CCTGGTGTGGACGGGAGAGGAGTGGGGAGGTTGGGCGCAGTGGCTCACGCCTGTAATCCC	intron sense-overlapping	ENST00000446427	MSLN	mesothelin [Source:HGNC Symbol;Acc:7371]	+	693261	818865	7.79664	9.71498
ASHGA5P047914	0.00407423	0.0243951	3.77917	down	noncoding	TCONS_00013447	XLOC_006100	LincRNAs identified by Cabili et al	341	chr7	+	52561401	52569695	AACTTCTCATAGAGGCTGGCTGTGTTAGACTTTTGCTAAGGCCAAGAGTTTTATTTTGTT	intergenic							3.3758	5.29387
ASHGA5P049028	0.0102536	0.0412694	3.77249	down	noncoding	uc021taz.1	HM587424	UCSC_knowngene	622	chr16	+	3048955	3050814	TCCTCCTCCAGGGTTCCATGGGGCCAATGGTTTTAGGAATAGTGAGTCAGACCCAGGGGA	intergenic							4.78714	6.70266
ASHGA5P037363	8.7702e-07	0.000231057	3.76545	down	noncoding	ENST00000439088	LINC00163	GENCODE	2135	chr21	-	46409778	46413984	CCTCTGGGCTTATAGTGGTTTTCTTTTCTACTGTCTGAAATTGAATGTTTAGTTCATCTA	intergenic							2.39697	4.30979
ASHGA5P007631	0.00344784	0.0221513	3.76426	down	noncoding	ENST00000335223	RP11-56D16.2	GENCODE	759	chr9	-	130455256	130477926	AAATTGCTGCTCTGTTTTCTTAACTGGCTTGGCTTGGACTCATCGTCAACAGCAGCAGCA	exon sense-overlapping	NM_001002913	PTRH1	probable peptidyl-tRNA hydrolase	-	130476226	130477936	4.9173	6.82966
ASHGA5P007631	0.00344784	0.0221513	3.76426	down	noncoding	ENST00000335223	RP11-56D16.2	GENCODE	759	chr9	-	130455256	130477926	AAATTGCTGCTCTGTTTTCTTAACTGGCTTGGCTTGGACTCATCGTCAACAGCAGCAGCA	intronic antisense	NM_001012502	C9orf117	uncharacterized protein C9orf117	+	130469270	130476303	4.9173	6.82966
ASHGA5P030794	0.0190739	0.0592588	3.76133	down	noncoding	uc021sxj.1	AL109706	UCSC_knowngene	2503	chr15	+	99571772	99574275	CTTGTTAAGTGGAGCTGGGGGATGATTAATTTTGTTTGTTTGTTTTTGTTGTTCCCTGGT	intergenic							4.63089	6.54213
ASHGA5P039208	0.00398216	0.0241258	3.76039	down	noncoding	ENST00000415532	RP11-411H5.1	GENCODE	478	chr1	+	102189297	102195170	ACCTCCTCCAAAGAGTGTCATCTGTCAATATAATGTCATCTCTTGATTTCTCTGTTTTCT	intergenic							3.51693	5.42781
ASHGA5P014941	0.000685213	0.00979589	3.75172	down	noncoding	ENST00000414992	DCUN1D2-AS2	GENCODE	330	chr13	+	114123215	114130450	CCGGGACCAGCCTCCTCTTCCCTCCGGTGAGGCATGGACAATCAGACTTCTGGGCCAGGC	intronic antisense	NM_001014283	DCUN1D2	DCN1-like protein 2	-	114110133	114145023	6.68717	8.59472
ASHGA5P023906	0.00158954	0.0146279	3.74292	down	noncoding	HMlincRNA901+	HMlincRNA901	LincRNAs identified by Khalil et al	10599	chr15	+	46971964	46982563	CTCTTAAATCCAGGAAATAAATACTCTCTCTGTTCTCATTCTTTGAAGAATCTTGACAGG	intergenic							3.57262	5.47678
ASHGA5P051463	0.000351738	0.00670118	3.74228	down	noncoding	ENST00000537401	RP11-439A17.9	GENCODE	2034	chr1	+	120924840	120926874	ACAGTCCCTTAGGAGTCATTTGTAAGTACTATTTCCTTCCTTATTGTCTATACTATTCCC	natural antisense	NM_001004340	FCGR1B	high affinity immunoglobulin gamma Fc receptor IB isoform 2 precursor	-	120926127	120935944	2.69056	4.59447
ASHGA5P051463	0.000351738	0.00670118	3.74228	down	noncoding	ENST00000537401	RP11-439A17.9	GENCODE	2034	chr1	+	120924840	120926874	ACAGTCCCTTAGGAGTCATTTGTAAGTACTATTTCCTTCCTTATTGTCTATACTATTCCC	natural antisense	NM_001017986	FCGR1B	high affinity immunoglobulin gamma Fc receptor IB isoform 1 precursor	-	120926127	120935944	2.69056	4.59447
ASHGA5P046123	0.00452928	0.0257965	3.74142	down	noncoding	ENST00000452788	NHS-AS1	GENCODE	366	chrX	-	17570469	17575508	CCTCCTATCTCTAGACCTTGTGCTCTGTGAGAAAACTAAAACCCCATTTTGTTTAATGCC	intronic antisense	NM_198270	NHS	Nance-Horan syndrome protein isoform 1	+	17393542	17754113	6.04711	7.95069
ASHGA5P000510	0.0188094	0.0588554	3.7218	down	noncoding	chr8:117452225-117463525+	chr8:117452225-117463525	LincRNAs identified by Khalil et al	11300	chr8	+	117383044	117394344	ATTCAACAATAACTTGCTGGACACACACTATGGATAAAGTGCTGTACTTGTGTAAGCAAA	intergenic							3.80795	5.70395
ASHGA5P015431	0.00109704	0.0121142	3.7177	down	noncoding	ENST00000420180	RP1-76B20.12	GENCODE	244	chr22	-	30107808	30115703	GTTGACCAAGTGCTGGGATTACCGAATGGGAGCCACCATGCCCAGTCTTTACTCAAAATT	bidirectional	NM_182527	CABP7	calcium-binding protein 7	+	30116343	30127820	4.14741	6.04182
ASHGA5P039960	0.00194674	0.0163042	3.71233	down	noncoding	ENST00000507344	RP11-51P8.1	GENCODE	768	chr4	+	66724478	66725922	CAAACATTTTTAGGTATGTAGAAACAATGTATACACACACATGCACACACACATTAGTGC	intergenic							5.94701	7.83933
ASHGA5P031996	0.00411195	0.0244679	3.6884	down	noncoding	ENST00000567968	RP5-1142A6.2	GENCODE	4521	chr16	+	88803207	88807826	TTGCAAAATGGAAAATCAAGGGTTAGGGTAAAGAAAGAAAGTAGCCAGAAAGAGCCCCCA	natural antisense	NM_001142864	PIEZO1	piezo-type mechanosensitive ion channel component 1	-	88781745	88851372	4.71935	6.60235
ASHGA5P048559	0.0129998	0.0474494	3.68836	down	noncoding	TCONS_00005056	XLOC_001935	LincRNAs identified by Cabili et al	237	chr2	-	747657	748017	TGATGGTGAGGTCGGGGCTGTAGCATCGTCATTGGTGGTGGTGATGGTGAGGTCGGGGCT	intergenic							6.89826	8.78124
ASHGA5P028557	0.00426682	0.0250093	3.6869	down	noncoding	ENST00000415979	AL583842.2	GENCODE	363	chr1	-	142569265	142588234	GAGAGGATTTCAGATGATAGAAGTCGGGCAACTATCCCAGGTTTAAGAAATAAGCAAATG	intergenic							3.30076	5.18317
ASHGA5P047572	0.00166334	0.0150591	3.67384	down	noncoding	TCONS_00014179	XLOC_006188	LincRNAs identified by Cabili et al	233	chr7	+	99597001	99605862	CCCCACCTGCAGAGTCAAGTCCCTCCTCCCACCTCAGCACTGCTAGAAAAGAGCTTCAGG	intergenic							8.64733	10.5246
ASHGA5P031729	0.000373439	0.0069264	3.67374	down	noncoding	ENST00000565625	RP11-352B15.1	GENCODE	726	chr16	+	34982727	34990167	GGAGGCTTTTGGATTGCCTCTCCATTCCCACTTTCCCCTACTAGTCACAATGCTTCCCAA	intergenic							6.03404	7.91129
ASHGA5P032827	0.0253793	0.0697326	3.67212	down	noncoding	TCONS_00029072	XLOC_013994	LincRNAs identified by Cabili et al	583	chr21	-	9826937	9827584	ATTCCAATTACAGGGCCTCGAAAGAGTCCTGTATTGTTATTTTTCGTCACTACCTCCCCG	intergenic							10.738	12.6146
ASHGA5P047031	0.00014664	0.00425531	3.67047	down	noncoding	uc021pwt.1	KCNQ1DN	UCSC_knowngene	61	chr10	-	99836117	99836178	TTTTAAAGAATGTTTTTCCATTCCCTTTTATGTGTTTTGCAGGTTACATCTCATTTCTTT	intergenic							2.79978	4.67575
ASHGA5P020985	0.00691328	0.0327077	3.66505	down	noncoding	ENST00000523336	RP11-317N12.1	GENCODE	784	chr8	+	33865374	33896526	TGAGAAGAATGAGCTGGCTGGGTTGGACATTCAGAGGTGACAATGGCCAGATCAACCTTG	intergenic							3.70141	5.57524
ASHGA5P038157	0.0221394	0.0639361	3.66456	down	noncoding	ENST00000422374	RP11-466L17.1	GENCODE	4063	chr1	+	56046709	56200675	AATCCCTTCACCCTCTCTCCATCTTTGTAAAAATTCTCCTCATTAAATTATTGTTCAGTG	intergenic							7.89294	9.76657
ASHGA5P044268	0.00897961	0.0378432	3.66444	down	noncoding	ENST00000522918	RP11-628E19.2	GENCODE	590	chr8	-	56429798	56433536	GTCTCTCTGCTTGCCTATTAACTTCCTAAATTAGTGCATTTTCCCCTGTCATTTAAAAAA	intronic antisense	NM_052898	XKR4	XK-related protein 4	+	56015016	56438710	5.44682	7.32041
ASHGA5P023349	0.0177798	0.0570847	3.66371	down	noncoding	ENST00000579057	LINC00271	GENCODE	464	chr6	+	135819074	135838197	GAATTGAAAGGCTTGGCTGTTGTTGATATAAAGGAATGCAGCTAACCAGGGAGATGGAAA	bidirectional	NM_001134830	AHI1	jouberin isoform a	-	135605109	135818903	3.29492	5.16822
ASHGA5P023349	0.0177798	0.0570847	3.66371	down	noncoding	ENST00000579057	LINC00271	GENCODE	464	chr6	+	135819074	135838197	GAATTGAAAGGCTTGGCTGTTGTTGATATAAAGGAATGCAGCTAACCAGGGAGATGGAAA	bidirectional	NM_001134831	AHI1	jouberin isoform a	-	135605109	135818903	3.29492	5.16822
ASHGA5P023349	0.0177798	0.0570847	3.66371	down	noncoding	ENST00000579057	LINC00271	GENCODE	464	chr6	+	135819074	135838197	GAATTGAAAGGCTTGGCTGTTGTTGATATAAAGGAATGCAGCTAACCAGGGAGATGGAAA	bidirectional	NM_001134832	AHI1	jouberin isoform b	-	135708921	135818903	3.29492	5.16822
ASHGA5P023349	0.0177798	0.0570847	3.66371	down	noncoding	ENST00000579057	LINC00271	GENCODE	464	chr6	+	135819074	135838197	GAATTGAAAGGCTTGGCTGTTGTTGATATAAAGGAATGCAGCTAACCAGGGAGATGGAAA	bidirectional	NM_017651	AHI1	jouberin isoform a	-	135605109	135818903	3.29492	5.16822
ASHGA5P055466	0.0459005	0.0977027	3.66333	down	noncoding	TCONS_00029068	XLOC_013994	LincRNAs identified by Cabili et al	312	chr21	-	9826393	9827584	ACCATGGTAGGCACGGCGACTACCATCGAAAGTTGATAGGGCAGACGTTCGAATGGGTCG	intergenic							13.0692	14.9424
ASHGA5P043938	0.0185135	0.0583668	3.65078	down	noncoding	ENST00000413567	AC083867.4	GENCODE	457	chr7	+	137848185	137849383	AGGAGGAGGAGGAGAAAAGGATTTGAAGAAATTGAATCAGTTCTGGAACAGCAGACACAG	intergenic							3.75675	5.62495
ASHGA5P046941	0.0201273	0.0610013	3.64993	down	noncoding	ENST00000435317	RP11-464F9.9	GENCODE	508	chr10	-	75432879	75435692	AGCTTTTAAAAAGGAGCATCTCAGAATAAGATGGTGGTACAATTTGCTTATTGAGAAAGG	exon sense-overlapping	NM_001144000	AGAP5	arf-GAP with GTPase, ANK repeat and PH domain-containing protein 5	-	75434032	75457554	3.78765	5.65552
ASHGA5P041340	0.00102223	0.011657	3.64224	down	noncoding	ENST00000515092	RP11-43D2.2	GENCODE	832	chr5	+	124043519	124046430	TTATGTATGTCTCCTGCCTCTTCTTTCCATACCTCCCAAATGTTGATCCAAAACACTGAT	intronic antisense	NM_020747	ZNF608	zinc finger protein 608	-	123972609	124080805	5.54489	7.40972
ASHGA5P055826	0.000685118	0.00979589	3.62704	down	noncoding	ENST00000445540	GPC6-AS2	GENCODE	587	chr13	-	94470676	94488397	GGACAAGACTGTGCTGGTATCTTTTCCTTTCTCCTCCATTTCTTTCCCATTTATCAGCAC	intronic antisense	NM_005708	GPC6	glypican-6 precursor	+	93879077	95060273	4.84019	6.69898
ASHGA5P026308	0.0091902	0.0384147	3.62202	down	noncoding	TCONS_00013683	XLOC_006345	LincRNAs identified by Cabili et al	292	chr7	-	4645445	4646569	GGGAGGCATTGGACACCCACACACACACAGCAGACAAACTCCTCAGATGTGGACTTGAAG	intergenic							6.30588	8.16268
ASHGA5P035692	0.0205229	0.0615566	3.621	down	noncoding	ENST00000444416	AC073479.1	GENCODE	2695	chr2	+	6122109	6125029	CTTTCCTTCCCCCCATCCCTTGAACAAACATGATTTTTAAATTCCCCTCATCATTTTTAG	intergenic							10.6985	12.5549
ASHGA5P046265	0.0200445	0.0608796	3.61526	down	noncoding	ENST00000424887	TCEAL3-AS1	GENCODE	361	chrX	-	102881003	102881420	TCTCTCATGTGGCTTCTCAGATTGCTTGCTTTCTAGTGCTGCTAATAGAAGACACTATAG	intergenic							4.32681	6.18091
ASHGA5P030429	0.00351971	0.0224028	3.61218	down	noncoding	TCONS_00008451	XLOC_003910	LincRNAs identified by Cabili et al	737	chr4	-	25554573	25556581	ATCTCCTTCCTCTGAAGATTCTGTTCAGAATGGATAAAGGTTCAGCATCCTCCCTGGATG	intergenic							4.2497	6.10257
ASHGA5P056528	0.0006834	0.00979589	3.60984	down	noncoding	TCONS_00005360	XLOC_002543	LincRNAs identified by Cabili et al	715	chr2	-	241320859	241322761	AGGAACCGGTGAGAATATGTGGTCCCATACTTTTGCTTTCCTTTCCTACCTTCTCATCCT	intergenic							3.06886	4.9208
ASHGA5P025770	2.67506e-05	0.0015914	3.6081	down	noncoding	NR_034108	TRAF3IP2-AS1	RefSeq	4943	chr6	+	111804674	111923497	TGTGGTTTCTGTCGGCTTTCTCCATATTTACGTGCTTGTAACTCTGGCATGACCTTTGCT	intronic antisense	NM_001164281	TRAF3IP2	adapter protein CIKS isoform 3	-	111876580	111927477	3.19552	5.04676
ASHGA5P025770	2.67506e-05	0.0015914	3.6081	down	noncoding	NR_034108	TRAF3IP2-AS1	RefSeq	4943	chr6	+	111804674	111923497	TGTGGTTTCTGTCGGCTTTCTCCATATTTACGTGCTTGTAACTCTGGCATGACCTTTGCT	intronic antisense	NM_001164283	TRAF3IP2	adapter protein CIKS isoform 5	-	111876580	111888563	3.19552	5.04676
ASHGA5P025770	2.67506e-05	0.0015914	3.6081	down	noncoding	NR_034108	TRAF3IP2-AS1	RefSeq	4943	chr6	+	111804674	111923497	TGTGGTTTCTGTCGGCTTTCTCCATATTTACGTGCTTGTAACTCTGGCATGACCTTTGCT	intronic antisense	NM_147686	TRAF3IP2	adapter protein CIKS isoform 2	-	111876580	111927477	3.19552	5.04676
ASHGA5P027687	0.00657469	0.0316581	3.60806	down	noncoding	BF739255		LincRNAs identified by Khalil et al	163	chrX	-	128835377	128835612	GTCCACTCCGTCACTCACCTGCTTGCCATCCTCATTGCGGGCTTTAACTCATCAGCCCTG	intergenic							7.09204	8.94326
ASHGA5P048272	0.000252145	0.00560251	3.6074	down	noncoding	AK054953		LincRNAs identified by Khalil et al	2228	chr3	+	160981722	160983945	TTGAGTTCTTGTCCTTCTACCATCATCACTGGAAAAACATCTCTGGGTAGTCACTGCCTC	intergenic							2.75891	4.60987
ASHGA5P042940	0.0019343	0.0162422	3.60488	down	noncoding	ENST00000439839	AC004485.3	GENCODE	527	chr7	-	24236280	24295338	GCTCCCCCTCTCTGTGTATTGGTCAATCACTGTCTGATCATACTGTACTGAAATTAATTC	intergenic							9.18422	11.0342
ASHGA5P032017	0.000454134	0.00774043	3.59922	down	noncoding	ENST00000421159	IPO9-AS1	GENCODE	456	chr1	-	201789582	201798213	TGTTTGTTTGCTTGTTTTTGTTTTTCATTTTTACCTTTTACAGATTGATTTAAACATTTT	natural antisense	NM_001167738	NAV1	neuron navigator 1 isoform 2	+	201708962	201796102	5.21716	7.06485
ASHGA5P032017	0.000454134	0.00774043	3.59922	down	noncoding	ENST00000421159	IPO9-AS1	GENCODE	456	chr1	-	201789582	201798213	TGTTTGTTTGCTTGTTTTTGTTTTTCATTTTTACCTTTTACAGATTGATTTAAACATTTT	natural antisense	NM_020443	NAV1	neuron navigator 1 isoform 1	+	201617449	201796102	5.21716	7.06485
ASHGA5P039373	0.0206171	0.0617442	3.59745	down	noncoding	ENST00000513616	RP11-415C15.3	GENCODE	649	chr4	-	27264127	27268876	TGTGTAAGTTTTGGGGTCTAAGAATTAGAACTGATGTCACATGCAGAGTTTGTCAAGTGC	intergenic							3.51903	5.36601
ASHGA5P022041	0.02046	0.0614166	3.57886	down	noncoding	ENST00000553197	RP11-121G22.3	GENCODE	875	chr12	+	81672979	81706068	CATTTCTGAGGTCAGAGGCAGTGCAGCTTGTGTTACAACTCAAAAGAGTAATACTCTGAA	intronic antisense	NM_001220473	PPFIA2	liprin-alpha-2 isoform b	-	81652044	82152474	3.74274	5.58223
ASHGA5P022041	0.02046	0.0614166	3.57886	down	noncoding	ENST00000553197	RP11-121G22.3	GENCODE	875	chr12	+	81672979	81706068	CATTTCTGAGGTCAGAGGCAGTGCAGCTTGTGTTACAACTCAAAAGAGTAATACTCTGAA	intronic antisense	NM_001220474	PPFIA2	liprin-alpha-2 isoform c	-	81652044	82152474	3.74274	5.58223
ASHGA5P022041	0.02046	0.0614166	3.57886	down	noncoding	ENST00000553197	RP11-121G22.3	GENCODE	875	chr12	+	81672979	81706068	CATTTCTGAGGTCAGAGGCAGTGCAGCTTGTGTTACAACTCAAAAGAGTAATACTCTGAA	intronic antisense	NM_001220475	PPFIA2	liprin-alpha-2 isoform d	-	81652044	82152286	3.74274	5.58223
ASHGA5P022041	0.02046	0.0614166	3.57886	down	noncoding	ENST00000553197	RP11-121G22.3	GENCODE	875	chr12	+	81672979	81706068	CATTTCTGAGGTCAGAGGCAGTGCAGCTTGTGTTACAACTCAAAAGAGTAATACTCTGAA	intronic antisense	NM_001220476	PPFIA2	liprin-alpha-2 isoform e	-	81652044	82152286	3.74274	5.58223
ASHGA5P022041	0.02046	0.0614166	3.57886	down	noncoding	ENST00000553197	RP11-121G22.3	GENCODE	875	chr12	+	81672979	81706068	CATTTCTGAGGTCAGAGGCAGTGCAGCTTGTGTTACAACTCAAAAGAGTAATACTCTGAA	intronic antisense	NM_001220477	PPFIA2	liprin-alpha-2 isoform f	-	81652044	81992150	3.74274	5.58223
ASHGA5P022041	0.02046	0.0614166	3.57886	down	noncoding	ENST00000553197	RP11-121G22.3	GENCODE	875	chr12	+	81672979	81706068	CATTTCTGAGGTCAGAGGCAGTGCAGCTTGTGTTACAACTCAAAAGAGTAATACTCTGAA	intronic antisense	NM_001220478	PPFIA2	liprin-alpha-2 isoform g	-	81652044	81992150	3.74274	5.58223
ASHGA5P022041	0.02046	0.0614166	3.57886	down	noncoding	ENST00000553197	RP11-121G22.3	GENCODE	875	chr12	+	81672979	81706068	CATTTCTGAGGTCAGAGGCAGTGCAGCTTGTGTTACAACTCAAAAGAGTAATACTCTGAA	intronic antisense	NM_001220479	PPFIA2	liprin-alpha-2 isoform h	-	81652044	81763193	3.74274	5.58223
ASHGA5P022041	0.02046	0.0614166	3.57886	down	noncoding	ENST00000553197	RP11-121G22.3	GENCODE	875	chr12	+	81672979	81706068	CATTTCTGAGGTCAGAGGCAGTGCAGCTTGTGTTACAACTCAAAAGAGTAATACTCTGAA	intronic antisense	NM_001220480	PPFIA2	liprin-alpha-2 isoform i	-	81652044	81763193	3.74274	5.58223
ASHGA5P022041	0.02046	0.0614166	3.57886	down	noncoding	ENST00000553197	RP11-121G22.3	GENCODE	875	chr12	+	81672979	81706068	CATTTCTGAGGTCAGAGGCAGTGCAGCTTGTGTTACAACTCAAAAGAGTAATACTCTGAA	intronic antisense	NM_003625	PPFIA2	liprin-alpha-2 isoform a	-	81652044	82153109	3.74274	5.58223
ASHGA5P032346	0.0150602	0.0520699	3.57679	down	noncoding	ENST00000581727	CTC-304I17.3	GENCODE	536	chr17	-	32445365	32445901	CTCCTCCAACCCCACTCCCAGCACATACACATGAAAGAAAATAAAGAAAAAGAAAAAACA	intron sense-overlapping	NM_001094	ASIC2	acid-sensing ion channel 2 isoform MDEG1	-	31340105	32483825	8.1489	9.98756
ASHGA5P054268	0.0041721	0.0246767	3.5733	down	noncoding	TCONS_00013287	XLOC_005955	LincRNAs identified by Cabili et al	1258	chr7	+	389256	390969	ACTCCACACAACGTCCAAAACTCACGCTCACACACATCAAAACACAACTTCGCACAACGT	intergenic							4.60107	6.43833
ASHGA5P047952	0.00327099	0.0214172	3.56849	down	noncoding	BU662692		LincRNAs identified by Khalil et al	685	chr21	+	28066289	28066965	CCTCTTCACTCCTTTTGCTACCCAAGTGACGTATCATACAGCAAGCTAACACTTGGTAGA	intergenic							3.59108	5.42639
ASHGA5P039297	0.00357525	0.0226269	3.56437	down	noncoding	TCONS_00024147	XLOC_011515	LincRNAs identified by Cabili et al	684	chr15	-	68775546	68777423	GCCTGCCTCTCCTGCCCTGTGGTGTTGCTGTCCTCATATGACCCTTCAGTCCCCCGACAT	intergenic							9.62276	11.4564
ASHGA5P050165	0.00351988	0.0224028	3.55776	down	noncoding	TCONS_00019067	XLOC_009007	LincRNAs identified by Cabili et al	358	chr10	-	134824705	134825301	ACACACTAACACACATCACACGTGCTAAAACACGTCACACAAGCACACATCACACACACT	intergenic							5.32204	7.15301
ASHGA5P028694	0.0261107	0.0707567	3.55238	down	noncoding	ENST00000448748	LINC00349	GENCODE	841	chr13	+	19114636	19124837	CTCTGTCCTCTTTTCTCATACAATTTATCTTTTCCACATATGGATGGAATAAAACTGCAG	intergenic							4.25713	6.08592
ASHGA5P018197	0.00844907	0.0365769	3.54848	down	noncoding	ENST00000450527	RP11-342D14.1	GENCODE	722	chrX	+	45042495	45193162	CAATTAACAGGTGTGAGCCACTGCACCCAGCCTAAAGAGAATATTTTCTCAATTAAAAAT	intronic antisense	NM_024689	CXorf36	deleted in autism-related protein 1 isoform 2 precursor	-	45021554	45060146	8.22209	10.0493
ASHGA5P018197	0.00844907	0.0365769	3.54848	down	noncoding	ENST00000450527	RP11-342D14.1	GENCODE	722	chrX	+	45042495	45193162	CAATTAACAGGTGTGAGCCACTGCACCCAGCCTAAAGAGAATATTTTCTCAATTAAAAAT	intronic antisense	NM_176819	CXorf36	deleted in autism-related protein 1 isoform 1 precursor	-	45007617	45060146	8.22209	10.0493
ASHGA5P041897	0.00961687	0.0395527	3.54811	down	noncoding	ENST00000432050	RP11-154D6.1	GENCODE	418	chr6	-	72004875	72020298	TTGTTTTCCTTTCCAACTACCACTCCTCCTGCCTGATAAATAAATACCATTGCAAGATTA	intronic antisense	NM_024576	OGFRL1	opioid growth factor receptor-like protein 1	+	71998476	72011973	6.37306	8.20011
ASHGA5P023111	0.0177626	0.057064	3.54291	down	noncoding	ENST00000570118	RP11-243A14.3	GENCODE	451	chr16	-	9539866	9549362	TTTGTCTTGGAAGCAGACAATGGCCCTTCACCAGTAAGACCAAGAGAATAAGAAAAAATA	intergenic							5.21904	7.04398
ASHGA5P044971	0.000353633	0.00670957	3.53526	down	noncoding	ENST00000521904	RP11-1101K5.1	GENCODE	477	chr8	+	112388867	112482846	CTAAACTAACTACAAGCTCCTCCACATTATCAGGACAAACACAATTCTAACTCTCAAAAG	intergenic							3.07525	4.89707
ASHGA5P032901	0.00580559	0.0296584	3.53494	down	noncoding	ENST00000577684	RP1-37N7.3	GENCODE	1871	chr17	+	18314472	18317694	AGCACGGGTTCCTGTGGCGGCAGCTTTTCCTTCCATCTCCTTCTCTCCACCCGCTGGCTT	intergenic							6.81823	8.63991
ASHGA5P021511	0.000225504	0.0052776	3.53211	down	noncoding	ENST00000533775	TSSC2	GENCODE	1210	chr11	+	3404691	3430191	TAGAAAGTAGAGTTTGAACAACTGACTCTTGATGGACACAACCTTCCTTCTCTCGTCTGT	intergenic							3.28945	5.10998
ASHGA5P057976	0.00205503	0.0167221	3.52724	down	noncoding	TCONS_00024510	XLOC_011826	LincRNAs identified by Cabili et al	947	chr16	+	88219180	88220350	TCGCACACACGCATACACGTGCCCAGACCTACAGACACACTCACATTTGCACAGTCACAC	intergenic							4.81658	6.63513
ASHGA5P029866	0.0036367	0.0228745	3.52716	down	noncoding	ENST00000558398	HERC2P2	GENCODE	578	chr15	-	23285219	23293417	CGGCCCAATTTTCCAAAGTCACCATCACCCCAGGAAAATACCAAACCTAGGTTTAAAAAT	intergenic							5.13437	6.95287
ASHGA5P042875	0.00204546	0.0166979	3.52472	down	noncoding	ENST00000453348	AC074389.9	GENCODE	637	chr7	-	1778265	1781908	CTCTCCCTGATGTTCTGCTTGGTTATTTACTTTTAATTCATGTTGGAGCTCCTCCTGCCA	intronic antisense	NM_001128636	ELFN1	protein phosphatase 1 regulatory subunit 28 precursor	+	1748797	1787590	4.10035	5.91786
ASHGA5P033000	0.00631224	0.0309109	3.51564	down	noncoding	ENST00000581240	RP11-68I3.5	GENCODE	270	chr17	+	27966644	27967843	ACTCCTCCCTACTCAAGGGTAACCTCCATCCTGAATTTTGTGCTTATCATTCCCTTTTTT	intronic antisense	NM_033389	SSH2	protein phosphatase Slingshot homolog 2	-	27952964	28257018	5.378	7.19179
ASHGA5P020341	0.000398886	0.00716983	3.4988	down	noncoding	ENST00000511927	RP11-504G3.1	GENCODE	573	chr11	+	18621335	18623311	CGGGCTTTAGGTCTTGCTCTGCCACCCAGGCTGGAGTGAGGTGCAAGCAGTCTTCCCATC	intergenic							3.41628	5.22314
ASHGA5P033291	0.0214304	0.0628645	3.49729	down	noncoding	ENST00000452766	RP11-488L4.1	GENCODE	597	chr1	-	234086183	234086853	CCTAGTCTCTCTGATTTGTTTTTCTCTGCCATTTTTGGTTTGAGGTGGCACTCAACATAT	intronic antisense	NM_173508	SLC35F3	solute carrier family 35 member F3	+	234040678	234460262	3.13977	4.94601
ASHGA5P045567	0.00536383	0.02854	3.49627	down	noncoding	TCONS_00001785	XLOC_001174	LincRNAs identified by Cabili et al	626	chr1	-	207097099	207097924	TAGAGTGTGCACACACACACTCATAGCCACACACCACGCAGTGACACACACTCATAACTA	intergenic							5.59763	7.40345
ASHGA5P000093	0.00535129	0.0284898	3.49299	down	noncoding	AY927632		RNAdb	1164	chr13	+	92011845	92013008	ATTTGCACATCCATAAGTAATATGTAACGGTGGCAATGAATGGCTGGCTGGGGTGGGATA	intergenic							5.892	7.69646
ASHGA5P039882	0.018922	0.0590457	3.48459	down	noncoding	ENST00000508199	RP11-103J17.1	GENCODE	538	chr4	+	37080198	37127046	GAATTACACATTTAAGAATCTACCTTATTGGGAAAAATACAGTCAAAGATTTTATAGAAA	intergenic							3.32561	5.1266
ASHGA5P027218	0.00802081	0.0354894	3.48201	down	noncoding	BF803219		LincRNAs identified by Khalil et al	175	chr8	+	90226145	90226296	AAGCCCTTCATGATCCTAGCTGTGATTTTCTTGCTCCCCCTTGCTATATTTATTCTGGGC	intergenic							9.46062	11.2605
ASHGA5P045034	0.00384719	0.0235558	3.48149	down	noncoding	ENST00000524100	RP11-473O4.5	GENCODE	917	chr8	+	130844546	130856750	GCACACTGCATCACCACACTCACTTATCAAGAAAAGGCCAATATTATCTAATATACGTGA	natural antisense	NM_001256763	FAM49B	protein FAM49B	-	130851838	130952118	4.47845	6.27815
ASHGA5P045034	0.00384719	0.0235558	3.48149	down	noncoding	ENST00000524100	RP11-473O4.5	GENCODE	917	chr8	+	130844546	130856750	GCACACTGCATCACCACACTCACTTATCAAGAAAAGGCCAATATTATCTAATATACGTGA	natural antisense	NM_016623	FAM49B	protein FAM49B	-	130851838	130952118	4.47845	6.27815
ASHGA5P031845	0.0226721	0.064885	3.47166	down	noncoding	ENST00000569274	RP11-63M22.2	GENCODE	1790	chr16	+	66754799	66765688	ATTGGTCACTATACCACAATTATCATTCTACAGTCAGTTTACTGTCATTACCTAGACAAC	natural antisense	NM_006141	DYNC1LI2	cytoplasmic dynein 1 light intermediate chain 2	-	66754798	66785525	3.19607	4.9917
ASHGA5P042177	0.00136478	0.0136076	3.46439	down	noncoding	ENST00000416770	RPS6KA2-IT1	GENCODE	579	chr6	-	166874150	166878871	ATCATGAGACTGCATTTTCTCTCGTCGGTTTCGGCATGAATTGTCCCAGAGTCTCAGAAA	intron sense-overlapping	NM_001006932	RPS6KA2	ribosomal protein S6 kinase alpha-2 isoform b	-	166822853	167275771	3.02391	4.81651
ASHGA5P042177	0.00136478	0.0136076	3.46439	down	noncoding	ENST00000416770	RPS6KA2-IT1	GENCODE	579	chr6	-	166874150	166878871	ATCATGAGACTGCATTTTCTCTCGTCGGTTTCGGCATGAATTGTCCCAGAGTCTCAGAAA	intron sense-overlapping	NM_021135	RPS6KA2	ribosomal protein S6 kinase alpha-2 isoform a	-	166822853	167040726	3.02391	4.81651
ASHGA5P027799	0.00137896	0.0136472	3.46305	down	noncoding	uc010sgj.1	POU5F1P3	UCSC_knowngene	381	chr12	+	8286945	8287326	AGTTCTTTCTGCAGAGCTTTGATGTCCTGGGACTCCTCCGGGTTTTGCTCCAGCTTCTCC	intron sense-overlapping	NM_016184	CLEC4A	C-type lectin domain family 4 member A isoform 1	+	8276227	8291203	3.44317	5.23522
ASHGA5P027799	0.00137896	0.0136472	3.46305	down	noncoding	uc010sgj.1	POU5F1P3	UCSC_knowngene	381	chr12	+	8286945	8287326	AGTTCTTTCTGCAGAGCTTTGATGTCCTGGGACTCCTCCGGGTTTTGCTCCAGCTTCTCC	intron sense-overlapping	NM_194447	CLEC4A	C-type lectin domain family 4 member A isoform 3	+	8276227	8291203	3.44317	5.23522
ASHGA5P027799	0.00137896	0.0136472	3.46305	down	noncoding	uc010sgj.1	POU5F1P3	UCSC_knowngene	381	chr12	+	8286945	8287326	AGTTCTTTCTGCAGAGCTTTGATGTCCTGGGACTCCTCCGGGTTTTGCTCCAGCTTCTCC	intron sense-overlapping	NM_194448	CLEC4A	C-type lectin domain family 4 member A isoform 4	+	8276227	8291203	3.44317	5.23522
ASHGA5P027799	0.00137896	0.0136472	3.46305	down	noncoding	uc010sgj.1	POU5F1P3	UCSC_knowngene	381	chr12	+	8286945	8287326	AGTTCTTTCTGCAGAGCTTTGATGTCCTGGGACTCCTCCGGGTTTTGCTCCAGCTTCTCC	intron sense-overlapping	NM_194450	CLEC4A	C-type lectin domain family 4 member A isoform 2	+	8276227	8291203	3.44317	5.23522
ASHGA5P040276	0.000326019	0.0064698	3.45183	down	noncoding	ENST00000502419	RP11-366H4.1	GENCODE	677	chr4	+	189081218	189082293	GGCACTGAAGCTAATAATGTAACTTTTCTCCCTTCTTTCTTCTTTGGCATAGATTTAAAG	intergenic							4.70385	6.49122
ASHGA5P000586	0.00559135	0.0292005	3.45038	down	noncoding	DB123109		UCR	577	chr3	+	19007678	19168611	ATTCTCACAAAGAAAGAGCTCCTGCCATGTTACATGCCTGCTCTCCATCTGCCTTCCAAC	intergenic							5.95406	7.74081
ASHGA5P049549	0.00262551	0.0189287	3.44953	down	noncoding	ENST00000446853	CCDC144B	GENCODE	485	chr17	-	18431899	18454999	CAAGTTTAACGTGTGTGCTCCACTCCTCCAACCTGGCCAAAGGGCAGTCATCATCACTGG	intergenic							5.84549	7.63189
ASHGA5P034862	0.00108446	0.0120189	3.44097	down	noncoding	ENST00000414795	AC017076.5	GENCODE	506	chr2	-	6969010	6980595	ATCCATGGGATTCCATTCATAACCTCATAAACCACCCCCACGAAGAAATTATATATCTCG	intergenic							8.57981	10.3626
ASHGA5P043292	0.00131619	0.0135354	3.42632	down	noncoding	ENST00000421965	AC006159.4	GENCODE	692	chr7	-	116203647	116211288	CTTTAAATCCACTCACACCCAACTTTTAAACAAAAAGTAGCAGTATATCCTACACACGAT	intergenic							3.54858	5.32524
ASHGA5P040726	0.000297796	0.00614312	3.42598	down	noncoding	ENST00000455105	RP11-763B22.4	GENCODE	314	chr1	+	148760503	148761583	GTGTTCCTTTAGGCAAAAGGACTTGCTTCCATTGTTTGTTCAATTGTTTGTGTTTGTTAA	intergenic							7.66319	9.4397
ASHGA5P049899	0.00245236	0.018254	3.4221	down	noncoding	TCONS_00002569	XLOC_001174	LincRNAs identified by Cabili et al	1030	chr1	-	207096851	207097961	AGACAGAGCATAGAGTGCGCACACACACACTCATAGCCACACACCACGCAGTGACACACA	intergenic							5.69598	7.47086
ASHGA5P038080	0.000447914	0.00765967	3.41683	down	noncoding	ENST00000412804	AC024168.2	GENCODE	858	chr3	-	4532574	4534847	TTGTGCTCTCTACCTCCCCTGACCCAGAAGGACTTATTCTTCTTTCTGCACATTTTAGTA	bidirectional	NM_001099952	ITPR1	inositol 1,4,5-trisphosphate receptor type 1 isoform 1	+	4535031	4889524	8.83077	10.6034
ASHGA5P038080	0.000447914	0.00765967	3.41683	down	noncoding	ENST00000412804	AC024168.2	GENCODE	858	chr3	-	4532574	4534847	TTGTGCTCTCTACCTCCCCTGACCCAGAAGGACTTATTCTTCTTTCTGCACATTTTAGTA	bidirectional	NM_001168272	ITPR1	inositol 1,4,5-trisphosphate receptor type 1 isoform 3	+	4535031	4889524	8.83077	10.6034
ASHGA5P038080	0.000447914	0.00765967	3.41683	down	noncoding	ENST00000412804	AC024168.2	GENCODE	858	chr3	-	4532574	4534847	TTGTGCTCTCTACCTCCCCTGACCCAGAAGGACTTATTCTTCTTTCTGCACATTTTAGTA	bidirectional	NM_002222	ITPR1	inositol 1,4,5-trisphosphate receptor type 1 isoform 2	+	4535031	4889524	8.83077	10.6034
ASHGA5P051848	0.00226059	0.0175906	3.41504	down	noncoding	ENST00000452051	TM4SF19-AS1	GENCODE	1829	chr3	+	196045220	196052441	ATGTGTGACCCAAAGGAGCTTGTAGTTCGTCTGTGTGTCTTTTTGTCTCTCTCTCTCTCT	natural antisense	NM_001204897	TM4SF19	transmembrane 4 L6 family member 19 isoform 2	-	196050416	196065291	4.4896	6.2615
ASHGA5P051848	0.00226059	0.0175906	3.41504	down	noncoding	ENST00000452051	TM4SF19-AS1	GENCODE	1829	chr3	+	196045220	196052441	ATGTGTGACCCAAAGGAGCTTGTAGTTCGTCTGTGTGTCTTTTTGTCTCTCTCTCTCTCT	natural antisense	NM_001204898	TM4SF19	transmembrane 4 L6 family member 19 isoform 3	-	196050416	196065291	4.4896	6.2615
ASHGA5P051848	0.00226059	0.0175906	3.41504	down	noncoding	ENST00000452051	TM4SF19-AS1	GENCODE	1829	chr3	+	196045220	196052441	ATGTGTGACCCAAAGGAGCTTGTAGTTCGTCTGTGTGTCTTTTTGTCTCTCTCTCTCTCT	natural antisense	NM_138461	TM4SF19	transmembrane 4 L6 family member 19 isoform 1	-	196050416	196065291	4.4896	6.2615
ASHGA5P031117	0.0180566	0.0577122	3.41035	down	noncoding	ENST00000561541	RP11-19N8.4	GENCODE	821	chr16	-	33054929	33102910	GTGGTGTACAGGCATAGAATGTCTTTACTGGATCATTGAAATAGTAAGGTAAATTGAACT	intergenic							4.03592	5.80584
ASHGA5P035372	0.0106649	0.042258	3.40743	down	noncoding	TCONS_00004454	XLOC_002331	LincRNAs identified by Cabili et al	1481	chr2	-	134785345	134788845	TTCACAGCTCTGAAAAAGTGAGAACAGCGAATTCACTTCCCTTCTCCCAAAAGGCATGTG	intergenic							6.48011	8.24879
ASHGA5P025750	0.000729208	0.0100359	3.40489	down	noncoding	NR_033413	SLC29A3	RefSeq	2194	chr10	+	73079009	73123147	AGACATCCTGGGTTGCAGTCCACATCCGTGTCCTGGCCTCACTGACGGTCATCCTGGCCA	exon sense-overlapping	NM_001174098	SLC29A3	equilibrative nucleoside transporter 3 isoform b	+	73079009	73123147	5.21953	6.98714
ASHGA5P025750	0.000729208	0.0100359	3.40489	down	noncoding	NR_033413	SLC29A3	RefSeq	2194	chr10	+	73079009	73123147	AGACATCCTGGGTTGCAGTCCACATCCGTGTCCTGGCCTCACTGACGGTCATCCTGGCCA	exon sense-overlapping	NM_018344	SLC29A3	equilibrative nucleoside transporter 3 isoform a	+	73079009	73123147	5.21953	6.98714
ASHGA5P029895	0.0008845	0.0109817	3.40328	down	noncoding	ENST00000567770	RP11-932O9.4	GENCODE	1068	chr15	-	30471078	30472146	AAACTGAAGTCGTTCCTCCTTCTCAAGTGCGAAGTGAACCTGCAGCAGAACATTAGAAAC	intergenic							2.96001	4.72694
ASHGA5P043223	0.0177106	0.0569909	3.40319	down	noncoding	ENST00000417409	RP11-161I10.1	GENCODE	506	chr1	+	190449508	190463427	GGTCACCTTGCTTTCTTTGCTCTTGATTGTTTTCTAGCCCTACTTCTGTGACTACATTAA	intergenic							5.20331	6.9702
ASHGA5P046967	0.00660442	0.0317515	3.40092	down	noncoding	ENST00000477192	RP11-773D16.1	GENCODE	800	chr10	-	81564240	81585538	GGCTGTGGGTTGTGCCCTTCACTCCTTGCCCTCCTCCATTCCCTGTCCTGATCTGAACTC	intergenic							10.1963	11.9622
ASHGA5P026078	0.0252335	0.0695183	3.40084	down	noncoding	BG925420		LincRNAs identified by Khalil et al	694	chr5	-	68023867	68024476	AGTGTCTCTCATCTGTGGTCTCTAATTCATTGAGGCCCAATGAATCTGCCTAAAGACAGG	intergenic							3.37883	5.14472
ASHGA5P041077	0.00267549	0.0190654	3.39965	down	noncoding	ENST00000511712	RP11-53O19.2	GENCODE	591	chr5	+	44753050	44765846	CACACATGTGCACACACACAGAGAATAATATAGGTCTAATGGCTTAGAATTTACACTTTA	intergenic							4.19768	5.96306
ASHGA5P029907	0.00670967	0.0320487	3.39921	down	noncoding	ENST00000529696	TMCO5B	GENCODE	1568	chr15	-	33527752	33534491	CATTCTTTCCCTGCTTTCCCTCTGGAATGTCTCTCTTTCAAATAAAGAATATGTTTGACG	intergenic							5.10725	6.87244
ASHGA5P045041	0.000479126	0.00803276	3.39799	down	noncoding	TCONS_00002039	XLOC_000208	LincRNAs identified by Cabili et al	755	chr1	+	56336787	56345476	TTAGGTGATGGGTTAATTATGCACAGTTGTGCCTTCCTCTCTCCTTTCTCAATCTTCGCC	intergenic							4.79342	6.55811
ASHGA5P031638	0.00424007	0.0249189	3.39695	down	noncoding	uc010vdm.1	RRN3P2	UCSC_knowngene	1256	chr16	+	29086162	29107582	TTGTTGGTCTGGCTGACTTCTGTTCCTCTTTTAAAAATTTAAGTTTGGCCGGGTGCGGTG	intergenic							4.41941	6.18365
ASHGA5P029320	0.00121435	0.0128412	3.39639	down	noncoding	TCONS_00010233	XLOC_004700	LincRNAs identified by Cabili et al	904	chr5	-	1041886	1042973	ATTCGTTCACACACCCATTCACAAACCCAGTCGTTCATACACCCATTCACACACTAACTC	intergenic							4.61414	6.37815
ASHGA5P020223	0.0156323	0.0531119	3.39338	down	noncoding	ENST00000509921	CTC-205M6.2	GENCODE	822	chr5	+	180258038	180261871	TGCGGGGAGGCCTCAGGGCACCTTCCTCCTCTCTCTCAGGCACGTCCTCGACCTCAGTTG	intergenic							7.44923	9.21195
ASHGA5P035972	0.00115009	0.012418	3.39215	down	noncoding	ENST00000455121	AC105053.4	GENCODE	783	chr2	+	86116402	86118103	GAATCACAAGACATCTGTTAAGCCCTTACTACCTCATTCACTCCACTCACATTAGGTTGA	bidirectional	NM_003896	ST3GAL5	lactosylceramide alpha-2,3-sialyltransferase isoform 1	-	86066270	86116157	5.79791	7.56011
ASHGA5P014883	0.000496297	0.00815749	3.38989	down	noncoding	ENST00000414345	LINC00362	GENCODE	264	chr13	+	23743973	23744736	AGAAAGTGTGTCTTTCTGAATTGCTGCTTCTCCTCTTCCTGTTGTTGCCTTCTTCTTCTG	intergenic							4.47597	6.23721
ASHGA5P035893	2.00321e-05	0.00139717	3.38771	down	noncoding	TCONS_00027491	XLOC_012984	LincRNAs identified by Cabili et al	409	chr19	+	16176616	16177093	GAAAACAAGGAGGCCTCCCTACCTCCACTTCATCCCACACAGGAGTCTTGATGCTGGGTG	intergenic							4.56848	6.32879
ASHGA5P029925	0.00231341	0.0177474	3.38764	down	noncoding	ENST00000560886	RP11-184D12.1	GENCODE	652	chr15	-	36231367	36266970	TGTCTTGTCTTTATGTTTGTTTCTCTTGGTTCTATAAATTGCATCCTCGAGTCCAGAAAA	intergenic							2.98879	4.74907
ASHGA5P053758	0.00193581	0.0162422	3.37406	down	noncoding	ENST00000422343	RP11-180I4.2	GENCODE	403	chr9	+	98412435	98478000	GCCCCCTCCAACCAACCTTGATTGTGAAATGATGATGAAATAAACCTTCATTATGGTGTG	intergenic							8.84905	10.6035
ASHGA5P029317	0.00116973	0.012529	3.373	down	noncoding	TCONS_00010873	XLOC_004700	LincRNAs identified by Cabili et al	715	chr5	-	1041183	1045593	TCACTCACTAATTTACACCAAGTCACTCCCACTCATTCAGATACAGGCTGGTCCAGCGAC	intergenic							3.86576	5.61979
ASHGA5P039505	1.44011e-05	0.00114477	3.365	down	noncoding	TCONS_00023571	XLOC_011393	LincRNAs identified by Cabili et al	209	chr15	-	21912350	21913857	AAGTCAAGTCGGTCCAAGAAGAATAAAGAGGCCAAGCCCAGTTGCATATCAGCAATCTCA	intergenic							2.75592	4.50653
ASHGA5P046068	0.00593726	0.0299167	3.36438	down	noncoding	ENST00000503395	TUBBP5	GENCODE	1735	chr9	+	141044564	141070960	GGCCAGCAATTTTCTCCTTCTCCAGTTAAACCTGTCCAACATTGAGGAACCAATCTACAT	intergenic							3.72298	5.47332
ASHGA5P054953	0.0182014	0.0579542	3.35678	down	noncoding	TCONS_00008386	XLOC_003839	LincRNAs identified by Cabili et al	205	chr4	+	190197916	190198269	ATCATGGGAATCTTGCACATGTTACAGGGAAGCACTGTCCTACATCATATGTGACAGGCT	intergenic							3.9204	5.66747
ASHGA5P019702	0.00866851	0.0371088	3.35352	down	noncoding	ENST00000500986	RP11-887P2.1	GENCODE	1655	chr12	-	93936239	93965544	GACCCTGGAGAGTTTGCCATCTCCGTACCACCACCACCACCACACACAGCACCCTCAAGA	intronic antisense	NM_001270467	SOCS2	suppressor of cytokine signaling 2	+	93964174	93970521	8.34702	10.0927
ASHGA5P019702	0.00866851	0.0371088	3.35352	down	noncoding	ENST00000500986	RP11-887P2.1	GENCODE	1655	chr12	-	93936239	93965544	GACCCTGGAGAGTTTGCCATCTCCGTACCACCACCACCACCACACACAGCACCCTCAAGA	intronic antisense	NM_001270468	SOCS2	suppressor of cytokine signaling 2	+	93964756	93970521	8.34702	10.0927
ASHGA5P019702	0.00866851	0.0371088	3.35352	down	noncoding	ENST00000500986	RP11-887P2.1	GENCODE	1655	chr12	-	93936239	93965544	GACCCTGGAGAGTTTGCCATCTCCGTACCACCACCACCACCACACACAGCACCCTCAAGA	intronic antisense	NM_003877	SOCS2	suppressor of cytokine signaling 2	+	93963597	93970521	8.34702	10.0927
ASHGA5P019702	0.00866851	0.0371088	3.35352	down	noncoding	ENST00000500986	RP11-887P2.1	GENCODE	1655	chr12	-	93936239	93965544	GACCCTGGAGAGTTTGCCATCTCCGTACCACCACCACCACCACACACAGCACCCTCAAGA	natural antisense	NM_001270469	SOCS2	suppressor of cytokine signaling 2	+	93965456	93970521	8.34702	10.0927
ASHGA5P019702	0.00866851	0.0371088	3.35352	down	noncoding	ENST00000500986	RP11-887P2.1	GENCODE	1655	chr12	-	93936239	93965544	GACCCTGGAGAGTTTGCCATCTCCGTACCACCACCACCACCACACACAGCACCCTCAAGA	natural antisense	NM_001270470	SOCS2	suppressor of cytokine signaling 2	+	93965456	93970521	8.34702	10.0927
ASHGA5P047709	0.0011022	0.0121408	3.352	down	noncoding	ENST00000420773	RP11-258A12.3	GENCODE	1952	chr10	+	114843552	114846535	ACGCACAAATCCATTCCCTCTTGCTGTGGAGGAGAAAATACATGAAAATCTGAATCCATA	intron sense-overlapping	NM_001146274	TCF7L2	transcription factor 7-like 2 isoform 1	+	114710008	114927436	3.78948	5.5345
ASHGA5P047709	0.0011022	0.0121408	3.352	down	noncoding	ENST00000420773	RP11-258A12.3	GENCODE	1952	chr10	+	114843552	114846535	ACGCACAAATCCATTCCCTCTTGCTGTGGAGGAGAAAATACATGAAAATCTGAATCCATA	intron sense-overlapping	NM_001146283	TCF7L2	transcription factor 7-like 2 isoform 3	+	114710008	114927436	3.78948	5.5345
ASHGA5P047709	0.0011022	0.0121408	3.352	down	noncoding	ENST00000420773	RP11-258A12.3	GENCODE	1952	chr10	+	114843552	114846535	ACGCACAAATCCATTCCCTCTTGCTGTGGAGGAGAAAATACATGAAAATCTGAATCCATA	intron sense-overlapping	NM_001146284	TCF7L2	transcription factor 7-like 2 isoform 4	+	114710008	114927436	3.78948	5.5345
ASHGA5P047709	0.0011022	0.0121408	3.352	down	noncoding	ENST00000420773	RP11-258A12.3	GENCODE	1952	chr10	+	114843552	114846535	ACGCACAAATCCATTCCCTCTTGCTGTGGAGGAGAAAATACATGAAAATCTGAATCCATA	intron sense-overlapping	NM_001146285	TCF7L2	transcription factor 7-like 2 isoform 5	+	114710008	114927436	3.78948	5.5345
ASHGA5P047709	0.0011022	0.0121408	3.352	down	noncoding	ENST00000420773	RP11-258A12.3	GENCODE	1952	chr10	+	114843552	114846535	ACGCACAAATCCATTCCCTCTTGCTGTGGAGGAGAAAATACATGAAAATCTGAATCCATA	intron sense-overlapping	NM_001146286	TCF7L2	transcription factor 7-like 2 isoform 6	+	114710008	114927436	3.78948	5.5345
ASHGA5P047709	0.0011022	0.0121408	3.352	down	noncoding	ENST00000420773	RP11-258A12.3	GENCODE	1952	chr10	+	114843552	114846535	ACGCACAAATCCATTCCCTCTTGCTGTGGAGGAGAAAATACATGAAAATCTGAATCCATA	intron sense-overlapping	NM_001198525	TCF7L2	transcription factor 7-like 2 isoform 7	+	114710008	114927436	3.78948	5.5345
ASHGA5P047709	0.0011022	0.0121408	3.352	down	noncoding	ENST00000420773	RP11-258A12.3	GENCODE	1952	chr10	+	114843552	114846535	ACGCACAAATCCATTCCCTCTTGCTGTGGAGGAGAAAATACATGAAAATCTGAATCCATA	intron sense-overlapping	NM_001198526	TCF7L2	transcription factor 7-like 2 isoform 8	+	114710008	114927436	3.78948	5.5345
ASHGA5P047709	0.0011022	0.0121408	3.352	down	noncoding	ENST00000420773	RP11-258A12.3	GENCODE	1952	chr10	+	114843552	114846535	ACGCACAAATCCATTCCCTCTTGCTGTGGAGGAGAAAATACATGAAAATCTGAATCCATA	intron sense-overlapping	NM_001198527	TCF7L2	transcription factor 7-like 2 isoform 9	+	114710008	114927436	3.78948	5.5345
ASHGA5P047709	0.0011022	0.0121408	3.352	down	noncoding	ENST00000420773	RP11-258A12.3	GENCODE	1952	chr10	+	114843552	114846535	ACGCACAAATCCATTCCCTCTTGCTGTGGAGGAGAAAATACATGAAAATCTGAATCCATA	intron sense-overlapping	NM_001198528	TCF7L2	transcription factor 7-like 2 isoform 10	+	114710008	114927436	3.78948	5.5345
ASHGA5P047709	0.0011022	0.0121408	3.352	down	noncoding	ENST00000420773	RP11-258A12.3	GENCODE	1952	chr10	+	114843552	114846535	ACGCACAAATCCATTCCCTCTTGCTGTGGAGGAGAAAATACATGAAAATCTGAATCCATA	intron sense-overlapping	NM_001198529	TCF7L2	transcription factor 7-like 2 isoform 11	+	114710008	114927436	3.78948	5.5345
ASHGA5P047709	0.0011022	0.0121408	3.352	down	noncoding	ENST00000420773	RP11-258A12.3	GENCODE	1952	chr10	+	114843552	114846535	ACGCACAAATCCATTCCCTCTTGCTGTGGAGGAGAAAATACATGAAAATCTGAATCCATA	intron sense-overlapping	NM_001198530	TCF7L2	transcription factor 7-like 2 isoform 12	+	114710008	114927436	3.78948	5.5345
ASHGA5P047709	0.0011022	0.0121408	3.352	down	noncoding	ENST00000420773	RP11-258A12.3	GENCODE	1952	chr10	+	114843552	114846535	ACGCACAAATCCATTCCCTCTTGCTGTGGAGGAGAAAATACATGAAAATCTGAATCCATA	intron sense-overlapping	NM_001198531	TCF7L2	transcription factor 7-like 2 isoform 13	+	114710008	114927436	3.78948	5.5345
ASHGA5P047709	0.0011022	0.0121408	3.352	down	noncoding	ENST00000420773	RP11-258A12.3	GENCODE	1952	chr10	+	114843552	114846535	ACGCACAAATCCATTCCCTCTTGCTGTGGAGGAGAAAATACATGAAAATCTGAATCCATA	intron sense-overlapping	NM_030756	TCF7L2	transcription factor 7-like 2 isoform 2	+	114710008	114927436	3.78948	5.5345
ASHGA5P041468	0.01283	0.0471681	3.34522	down	noncoding	ENST00000512096	MIR143HG	GENCODE	555	chr5	+	148786251	148803960	AACCACTCCTTCCTTAGGGGGTAAAAGCAACATTCAGCACCGGGGGCAGGTCAAGGCAAG	intergenic							5.03402	6.77612
ASHGA5P029321	0.00719219	0.0333262	3.33992	down	noncoding	TCONS_00010234	XLOC_004700	LincRNAs identified by Cabili et al	1647	chr5	-	1042002	1043709	CCATTCACACACGATCTCACCCATTCATTCACAAACTCACCCACTCGTTCACAGCCACTC	intergenic							5.56273	7.30254
ASHGA5P039116	0.00720825	0.0333671	3.33504	down	noncoding	ENST00000469196	RP11-6F2.5	GENCODE	1497	chr3	+	156799629	156806336	CCTTCCCTGATTTCAAAAAATAAAAATAAAAATGCTTCGGTTCTGAGGAGTAACTCTCCA	intergenic							3.182	4.9197
ASHGA5P054861	9.03442e-05	0.00325598	3.33044	down	noncoding	uc001nnn.1	BC028022	UCSC_knowngene	1980	chr11	-	58901711	58910281	GGCAGCTTGAGTCTCGCGCGCGCAGGAAGCGGAGGTGGAAGTTGGGGCGCAGGAATGTGG	natural antisense	ENST00000528737	FAM111A	family with sequence similarity 111, member A [Source:HGNC Symbol;Acc:24725]	+	58910220	58922512	2.70646	4.44217
ASHGA5P018440	0.00208107	0.0167994	3.32524	down	noncoding	ENST00000453584	DCUN1D2-AS2	GENCODE	319	chr13	+	114129704	114130450	ACCACAGACGAGCCTCCTCTTCCCTCCGGTGAGGCATGGACAATCAGACTTCTGGGCCAG	intronic antisense	NM_001014283	DCUN1D2	DCN1-like protein 2	-	114110133	114145023	6.52038	8.25384
ASHGA5P051306	0.00371496	0.023067	3.32075	down	noncoding	NR_027833	APOL3	RefSeq	2471	chr22	-	36536370	36556977	CTGTCCACAGGTGGCTCACATTCAGTCCCACAATTTGCTTTCTCCTCCTCAAGGGTTAAG	exon sense-overlapping	NM_145640	APOL3	apolipoprotein L3 isoform 1	-	36536370	36556977	4.53821	6.26972
ASHGA5P051306	0.00371496	0.023067	3.32075	down	noncoding	NR_027833	APOL3	RefSeq	2471	chr22	-	36536370	36556977	CTGTCCACAGGTGGCTCACATTCAGTCCCACAATTTGCTTTCTCCTCCTCAAGGGTTAAG	exon sense-overlapping	NM_145641	APOL3	apolipoprotein L3 isoform 3	-	36536370	36562225	4.53821	6.26972
ASHGA5P051306	0.00371496	0.023067	3.32075	down	noncoding	NR_027833	APOL3	RefSeq	2471	chr22	-	36536370	36556977	CTGTCCACAGGTGGCTCACATTCAGTCCCACAATTTGCTTTCTCCTCCTCAAGGGTTAAG	exon sense-overlapping	NM_145642	APOL3	apolipoprotein L3 isoform 3	-	36536370	36562225	4.53821	6.26972
ASHGA5P034027	8.37206e-06	0.000839425	3.31707	down	noncoding	DB297852		LincRNAs identified by Khalil et al	531	chr12	-	9064970	9065498	GTTCATTTTTCTCCAAGTCAGGCCAGTGTTCTAAGGTCATAGGTCTAAACAGTTCCCACC	intergenic							2.45853	4.18844
ASHGA5P040706	0.000716981	0.00995678	3.31537	down	noncoding	NR_030583	VTRNA2-1	RefSeq	100	chr5	-	135416186	135416286	CTTTCTATCTGTCCATCTCTGTGCTGGGGTTCGAGACCCGCGGGTGCTTACTGACCCTTT	intergenic							3.62734	5.35651
ASHGA5P057407	0.000280256	0.00594078	3.31194	down	noncoding	TCONS_00016894	XLOC_007895	LincRNAs identified by Cabili et al	3176	chr9	-	139144132	139148691	GCCTCCCCAGCTCCTGTGGTCCCTGAGGAGGCGGCGCCCCCAATCCTGCACCAGGGCAGT	intergenic							7.25052	8.97819
ASHGA5P039138	0.00384156	0.0235424	3.30873	down	noncoding	ENST00000494887	RP11-298O21.5	GENCODE	538	chr3	+	167621114	167632819	GTCTTCACCCTCCCTACCTTGGAAATTGCTACAACATAATTGTGTTTGTATGTATAATTA	intergenic							7.78345	9.50973
ASHGA5P052965	0.0241	0.0674066	3.30743	down	noncoding	ENST00000413182	AC073343.13	GENCODE	548	chr7	+	6703604	6705152	CAAACCCCAGGTGAGTTCCTTTTTTAGATTTTTTCATTTTCCAGGGGATTTGCTGGCTTT	intergenic							4.34623	6.07194
ASHGA5P017453	0.0253973	0.0697613	3.305	down	noncoding	ENST00000441809	CTA-520D8.2	GENCODE	1007	chr1	-	13983805	13987033	CTAAGATTTGGTTTTCTTTTTGTTTTCTCATTAAAATATCTTAAGCTTTATGGAGTAAAA	intergenic							3.83955	5.5642
ASHGA5P027952	0.000249613	0.00560251	3.3048	down	noncoding	TCONS_00012069	XLOC_005595	LincRNAs identified by Cabili et al	888	chr6	-	6696981	6712293	AGTTCTTTCTCACCCCTCCCCCATCAGCTCGTGGAAGCTTGGAGTGTGGAGCACAGCAAA	intergenic							11.6194	13.3439
ASHGA5P029177	0.0172452	0.0561701	3.30242	down	noncoding	ENST00000555156	RP11-355I22.4	GENCODE	295	chr14	-	62600866	62606691	CCCACCTCCCCTACTTAACAAAGGCACCTATATTTCACCAGAAATAAAATTTTATTAGTA	intergenic							8.65129	10.3748
ASHGA5P036129	0.000437455	0.00755346	3.28319	down	noncoding	ENST00000419223	AC023347.1	GENCODE	440	chr2	+	127069990	127086709	GAATCCATGGCTTTCAGTGTCTGGCCCTATTTCTTCTAGTTCAAGAATTTTAAGAAAAAA	intergenic							2.83734	4.55244
ASHGA5P028599	0.013524	0.0485611	3.28256	down	noncoding	ENST00000452852	LINC00393	GENCODE	485	chr13	-	74120524	74222390	GCAAAAATGTTCCAAAAGATACTCTCTCTGTCCAATACACTTGTAAGTGCATTCTAGAAT	intergenic							3.82388	5.5387
ASHGA5P044499	0.0217401	0.0633985	3.28153	down	noncoding	TCONS_00018433	XLOC_008729	LincRNAs identified by Cabili et al	596	chr10	-	10461499	10504510	GGTGGTTAAATTAGCGTGCTGGAATCTTTTCAGTTTGTCGCAGAGTAGAAAAATAAAAAA	intergenic							3.54042	5.25479
ASHGA5P040100	0.0233256	0.0660379	3.27777	down	noncoding	ENST00000511919	RP11-93L9.1	GENCODE	590	chr4	+	124571445	124851509	ATGAACAAGAAAGAGGACGTCTTATTATCTGGTGTCTGGCTTGCTGATTTAATAACCTAG	intergenic							3.10729	4.82001
ASHGA5P025918	0.00573911	0.0294821	3.27522	down	noncoding	NR_046318	ENC1	RefSeq	3705	chr5	-	73923230	73937249	AGTCGCCACTGCTCTCACTCCATCACTCGATGAGATAATATGAGATTTCTACTTCGGAGA	exon sense-overlapping	NM_001256574	ENC1	ectoderm-neural cortex protein 1 isoform 1	-	73923230	73937249	6.37846	8.09005
ASHGA5P025918	0.00573911	0.0294821	3.27522	down	noncoding	NR_046318	ENC1	RefSeq	3705	chr5	-	73923230	73937249	AGTCGCCACTGCTCTCACTCCATCACTCGATGAGATAATATGAGATTTCTACTTCGGAGA	exon sense-overlapping	NM_001256575	ENC1	ectoderm-neural cortex protein 1 isoform 1	-	73923230	73937249	6.37846	8.09005
ASHGA5P025918	0.00573911	0.0294821	3.27522	down	noncoding	NR_046318	ENC1	RefSeq	3705	chr5	-	73923230	73937249	AGTCGCCACTGCTCTCACTCCATCACTCGATGAGATAATATGAGATTTCTACTTCGGAGA	exon sense-overlapping	NM_001256576	ENC1	ectoderm-neural cortex protein 1 isoform 2	-	73923230	73937249	6.37846	8.09005
ASHGA5P025918	0.00573911	0.0294821	3.27522	down	noncoding	NR_046318	ENC1	RefSeq	3705	chr5	-	73923230	73937249	AGTCGCCACTGCTCTCACTCCATCACTCGATGAGATAATATGAGATTTCTACTTCGGAGA	exon sense-overlapping	NM_003633	ENC1	ectoderm-neural cortex protein 1 isoform 1	-	73923230	73937249	6.37846	8.09005
ASHGA5P049643	0.00358509	0.0226736	3.27286	down	noncoding	ENST00000578423	CTD-2206N4.4	GENCODE	1726	chr17	+	37213304	37268492	AATGCTTCATGTTTTTCCTTGGTGTCTGTCTCTCCTATTTCCACCCATCTCTGCTGGAGA	natural antisense	NM_020405	PLXDC1	plexin domain-containing protein 1 precursor	-	37219555	37307902	6.37936	8.08991
ASHGA5P023280	0.000211576	0.00509385	3.26731	down	noncoding	ENST00000577227	RP11-466A19.5	GENCODE	475	chr17	-	30856025	30857067	ATATGTCCATGAGTCCCACCATCTAATGCCTACAGGAAGTAAACCAGAAGTCTCATCCGA	intron sense-overlapping	NM_015194	MYO1D	unconventional myosin-Id	-	30819627	31203902	3.25632	4.96442
ASHGA5P020909	0.00215748	0.0171353	3.26627	down	noncoding	ENST00000521863	LINC00599	GENCODE	545	chr8	-	9760676	9761720	GGGAGCTGCGGAGAAAGGCCTCTCTCTCCGTGTTCACAGCGGACCTTGATTTAAATGTCC	intergenic							3.06791	4.77555
ASHGA5P038589	0.0237117	0.0666878	3.2619	down	noncoding	NR_040105	FLJ46066	RefSeq	1806	chr3	-	182164757	182204150	AAGACAATTTGGGGAGGTTTTATTAAGGTTGTATCCTGAGCACACATTTCTCTTGTTGCC	intergenic							3.066	4.77171
ASHGA5P035910	0.00067253	0.00972356	3.25278	down	noncoding	TCONS_00026944	XLOC_013005	LincRNAs identified by Cabili et al	2332	chr19	+	21155028	21167734	TTGTTTTACTCCTGTGCCCTTTATGAATGAGTGATGATCATCTTAAAAATCAGGATGTTC	intergenic							3.2667	4.96838
ASHGA5P041775	0.00144137	0.0139317	3.25237	down	noncoding	ENST00000458633	C4A-AS1	GENCODE	2095	chr6	-	31967752	31971298	CCACCACACCTTTCTCACATTTTCTCCCAGAGGTTACAGTAAATGTTCCAAAACTTTTTT	natural antisense	NM_001002029	C4B	complement C4-B preproprotein	+	31949833	31970458	3.68766	5.38915
ASHGA5P041775	0.00144137	0.0139317	3.25237	down	noncoding	ENST00000458633	C4A-AS1	GENCODE	2095	chr6	-	31967752	31971298	CCACCACACCTTTCTCACATTTTCTCCCAGAGGTTACAGTAAATGTTCCAAAACTTTTTT	natural antisense	NM_001242823	LOC100293534	complement C4-B-like preproprotein	+	31949833	31970458	3.68766	5.38915
ASHGA5P041775	0.00144137	0.0139317	3.25237	down	noncoding	ENST00000458633	C4A-AS1	GENCODE	2095	chr6	-	31967752	31971298	CCACCACACCTTTCTCACATTTTCTCCCAGAGGTTACAGTAAATGTTCCAAAACTTTTTT	natural antisense	NM_001252204	C4A	complement C4-A isoform 2 preproprotein	+	31949833	31970457	3.68766	5.38915
ASHGA5P041775	0.00144137	0.0139317	3.25237	down	noncoding	ENST00000458633	C4A-AS1	GENCODE	2095	chr6	-	31967752	31971298	CCACCACACCTTTCTCACATTTTCTCCCAGAGGTTACAGTAAATGTTCCAAAACTTTTTT	natural antisense	NM_007293	C4A	complement C4-A isoform 1 preproprotein	+	31949833	31970457	3.68766	5.38915
ASHGA5P032271	0.00145283	0.0139838	3.24807	down	noncoding	BE174175		LincRNAs identified by Khalil et al	327	chr10	+	112287106	112287405	TGGGGATGGGGAGAGCCCTTCCGGCATTCCTTCTCTCATTCACTCTAATAACATTTATAT	intergenic							4.22364	5.92323
ASHGA5P038279	0.00613483	0.0305945	3.24806	down	noncoding	TCONS_00023502	XLOC_011346	LincRNAs identified by Cabili et al	544	chr15	+	89943394	89981066	GTTATTTTGTTTGTTTGTTTTGAGACATAGTCACATAGTCTCACTCACCTCCTCCTCTCC	intergenic							4.56871	6.26829
ASHGA5P039466	0.0207527	0.0619275	3.24795	down	noncoding	ENST00000564925	RP11-109G23.3	GENCODE	2320	chr4	-	79694807	79697127	TGGGCCTGATATAACTTCACCTGATCACAACAAGCCTGCTATAATAAGTTTCAAAGTTAG	bidirectional	NM_017593	BMP2K	BMP-2-inducible protein kinase isoform b	+	79697531	79800594	4.9915	6.69103
ASHGA5P039466	0.0207527	0.0619275	3.24795	down	noncoding	ENST00000564925	RP11-109G23.3	GENCODE	2320	chr4	-	79694807	79697127	TGGGCCTGATATAACTTCACCTGATCACAACAAGCCTGCTATAATAAGTTTCAAAGTTAG	bidirectional	NM_198892	BMP2K	BMP-2-inducible protein kinase isoform a	+	79697531	79833341	4.9915	6.69103
ASHGA5P045715	0.00134151	0.0136076	3.24502	down	noncoding	ENST00000512404	RP11-397D12.6	GENCODE	363	chr9	+	37432083	37433871	CTGCTGGGTCTCTGTCCCTAAAGGAACAGAATGTAGGTGTGAGTGGATTTGTTTAAAAAA	exon sense-overlapping	NM_012203	GRHPR	glyoxylate reductase/hydroxypyruvate reductase	+	37422706	37436986	3.77631	5.47454
ASHGA5P046981	0.000981088	0.0115844	3.24427	down	noncoding	ENST00000456104	RP11-322M19.1	GENCODE	486	chr10	-	88995383	89086431	GGTGATGGTGTGTTGGGAGGGAACTGTTTTAGAAACCAATGTAAATCTGTGTCTACATCA	intergenic							4.3515	6.04939
ASHGA5P000113	0.00139004	0.0137086	3.24319	down	noncoding	BF986711R		LincRNAs identified by Khalil et al	245	chr2	-	3184560	3184961	ATAGTGAGCGTCCCCGTGTCGGTGCTGGAATAGTGAGCGTCCCCGTGTCGGTGCTGGAAT	intergenic							6.60044	8.29786
ASHGA5P021119	0.000922237	0.0112041	3.24069	down	noncoding	uc002ecm.4	KIAA0664L3	UCSC_knowngene	1433	chr16	+	31711933	31718745	CCGCGAGATGAGCCACCATCACTCATGTTCTTGAATGGGAACTGCCTGGAGACCCTGAAG	intergenic							3.69342	5.38972
ASHGA5P050604	0.0319792	0.0791571	3.23753	down	noncoding	ENST00000443205	AC096669.3	GENCODE	1539	chr2	+	108145942	108172782	AATAGAGAAGTAAATAGCAGTGCCAGGTTTCAAGCATAAGAATCATCAACTCTGAACTTT	intergenic							3.01327	4.70817
ASHGA5P057432	0.00488426	0.0269204	3.23202	down	noncoding	TCONS_00017287	XLOC_008109	LincRNAs identified by Cabili et al	578	chrX	-	6685656	6701527	CCCGCCAAAGGAGCCCACTCCATTATGAAAAAGAACTTCAAGCAAATTTGAATCTTTCTT	intergenic							4.77647	6.46891
ASHGA5P033563	0.0237636	0.0667859	3.23187	down	noncoding	ENST00000420830	RP11-261C10.2	GENCODE	475	chr1	-	243194573	243211171	TTGAAGGTATGGATAAGGCCCTGAGTCATCTTCCTGAGCTGAATGATAGTTAAGCTGAAT	intergenic							4.32696	6.01933
ASHGA5P028278	0.00656685	0.0316442	3.23044	down	noncoding	ENST00000553177	RP1-46F2.2	GENCODE	524	chr12	+	111374388	111396012	ACTCCCTCATCCATTCTTCCTGGCAGACTATTCAGTTGTGCTTTTTAAGATTTATTCTGT	intergenic							5.15606	6.8478
ASHGA5P046879	0.00824275	0.0360204	3.22883	down	noncoding	TCONS_00017163	XLOC_007974	LincRNAs identified by Cabili et al	237	chrX	+	47531908	47544867	ACTAATAAATTTTGTTTGATGCTCTCTCTCCATACTACAATGCCTGGACCGAGGTTAGTG	intergenic							4.19117	5.88218
ASHGA5P043281	0.00781395	0.0348416	3.22526	down	noncoding	TCONS_00019584	XLOC_009382	LincRNAs identified by Cabili et al	386	chr11	-	15932519	15933620	TGTTGAATTCCTTAAGGTGTCTGGAAAAAGAGAGAGAGAGAGCCAAAGAGGAAGAGGGGA	intergenic							4.18525	5.87467
ASHGA5P054814	0.00715719	0.0332811	3.22476	down	noncoding	ENST00000524410	RP11-430H10.1	GENCODE	605	chr11	+	45376921	45387672	CCCTTGGAAGCCAAGAATATGAGGAAGTCTTCTTCCTTCGCGCCTTCTTCTTCCTTACGC	intergenic							3.47361	5.16281
ASHGA5P031794	0.012706	0.0468335	3.21406	down	noncoding	ENST00000562822	RP11-355E10.1	GENCODE	459	chr16	+	56143448	56170655	CCTCTCCTTTCACAAGATGCTATTGTAAATTCAGGCTGCTTTAATCTCTGTGATTAAAAA	intergenic							3.49963	5.18403
ASHGA5P037584	0.00584994	0.0297531	3.20617	down	noncoding	uc002zuo.1	AX748067	UCSC_knowngene	1842	chr22	-	21642518	21646214	CCTCTGCCTCTCTCCTGGTGGTGGCGTTGAAACAGCACCCTCTGCTTCGGTCCTCTACAG	natural antisense	ENST00000360625	AP000552.1	Uncharacterized protein [Source:UniProtKB/TrEMBL;Acc:E7EQM0]	+	21645341	21648982	7.70805	9.3889
ASHGA5P045263	0.00271749	0.0192413	3.20286	down	noncoding	uc010moa.3	AK310876	UCSC_knowngene	1263	chr9	-	69746916	69757784	TCAAATTGGACCGCTCAGTTAAAAAGTTTTCCCATTAGACTTCCCCTAATCAAATTAGAA	intergenic							4.02449	5.70385
ASHGA5P034977	0.00425063	0.0249491	3.19465	down	noncoding	TCONS_00004741	XLOC_001414	LincRNAs identified by Cabili et al	539	chr2	+	31055131	31058199	GGAACTTCTGTTCTTACCCCTGTCCTTCCCTTCACCTTTTATAGTTACTAAATGCAATGT	intergenic							7.74793	9.42359
ASHGA5P018806	0.00626148	0.030826	3.19257	down	noncoding	ENST00000457834	AC012594.1	GENCODE	511	chr2	-	171201308	171207621	ATTAATGTATTAAGACATTAAGGCCACAGATCAGCCCTGGGGTTCAGAGGGATCCTGACA	intronic antisense	NM_001083615	MYO3B	myosin-IIIb isoform 1	+	171034654	171511674	3.39304	5.06776
ASHGA5P018806	0.00626148	0.030826	3.19257	down	noncoding	ENST00000457834	AC012594.1	GENCODE	511	chr2	-	171201308	171207621	ATTAATGTATTAAGACATTAAGGCCACAGATCAGCCCTGGGGTTCAGAGGGATCCTGACA	intronic antisense	NM_138995	MYO3B	myosin-IIIb isoform 2	+	171034654	171511674	3.39304	5.06776
ASHGA5P043645	0.0367127	0.0851001	3.18962	down	noncoding	NR_046325	KDM5B-AS1	RefSeq	764	chr1	+	202780073	202781041	CTCGTGCTTCTACCACCACCCTTCCCCTCCCAACCCGGTGGATCCTCTCGTCTCCCCCAG	intergenic							12.3863	14.0597
ASHGA5P044110	0.000297023	0.00614093	3.18724	down	noncoding	uc022ars.1	AK091593	UCSC_knowngene	3015	chr8	-	9757573	9760588	TGCTGCTTCCACAGAGAAAACATTTTCTCTTTCCTCCTCTTGAACTTACATAATATCCTC	intergenic							3.5875	5.2598
ASHGA5P058763	0.0101665	0.0410985	3.18588	down	noncoding	uc.482+	uc.482	UCR	295	chrX	+	139170487	139170782	GGAGGTGTCATTTGTACAAAGACTTTTTTGTTTTCTTTCCCCATTACATTATCACTGCAA	intergenic							4.08906	5.76075
ASHGA5P029511	0.0172118	0.0561113	3.18579	down	noncoding	ENST00000557188	DPPA3P2	GENCODE	1219	chr14	+	36840369	36841588	CAAGAAATTGAAGCAAAGTTACTTGTGGATAAAGAAAGCATTAGGTAGTTTGGCTATAGC	intergenic							2.84246	4.51412
ASHGA5P022022	0.00270558	0.0191861	3.1835	down	noncoding	uc001vvw.2	P775P	UCSC_knowngene	1990	chr14	-	19935900	19970058	GAATTTATGGGTAACCACTGATCCACTTCCAGTCACTATCCATGAGTTTTTATTTCCAAA	intergenic							2.85891	4.52953
ASHGA5P023173	0.0029737	0.0203265	3.18307	down	noncoding	ENST00000572353	RP11-353N14.4	GENCODE	540	chr17	+	77893172	77899261	AACGCCTCAGTGACGACCATTTGTGAGCCATCTCTCTGTCTCAGGCACGGTGCTACATGC	intergenic							3.87621	5.54663
ASHGA5P041184	0.0429528	0.0939663	3.18128	down	noncoding	uc003kex.3	LOC728723	UCSC_knowngene	1298	chr5	+	76383261	76401215	GTGTTTTTTTGGTTTTTGGTTTTGGTTTGAGTGAATCTTTTTGCAAAACATTTTAGACAT	bidirectional	NM_032367	ZBED3	zinc finger BED domain-containing protein 3	-	76372531	76383030	4.9625	6.63211
ASHGA5P052137	0.00101465	0.0116515	3.17939	down	noncoding	ENST00000511728	RP11-471J12.1	GENCODE	583	chr4	+	174451612	174458616	TACTGCTTCTCCTCTCTCCCCCAACTCCCTCCCACAAATGAAGTTTTCTCTTCTGAATTC	bidirectional	NM_021973	HAND2	heart- and neural crest derivatives-expressed protein 2	-	174447651	174451378	11.0419	12.7107
ASHGA5P043566	0.0246991	0.0685908	3.17585	down	noncoding	ENST00000517641	HOXA-AS2	GENCODE	583	chr7	+	27162061	27163437	TGTCTGTCTGCCTTCACGCAATTCTGTAGATAGCGCTAAGAGGGGATATCAAATAGCTGA	natural antisense	NM_153631	HOXA3	homeobox protein Hox-A3 isoform a	-	27145808	27166639	4.76603	6.43317
ASHGA5P036955	0.0152612	0.0523718	3.17177	down	noncoding	ENST00000449841	RP5-1069C8.1	GENCODE	484	chr20	+	12916686	12917842	AATCTGCTCACCTGAAAGGCTCACTCCTGTTGTAATAAATGACACATAAGGTCACAATTC	intergenic							3.27819	4.94348
ASHGA5P022177	0.0204506	0.0614166	3.16826	down	noncoding	ENST00000551401	RP11-121G22.3	GENCODE	792	chr12	+	81676462	81706188	CCAGTCATTGGTCAGAGGCAGTGCAGCTTGTGTTACAACTCAAAAGAGTAATACTCTGAA	intronic antisense	NM_001220473	PPFIA2	liprin-alpha-2 isoform b	-	81652044	82152474	3.83576	5.49946
ASHGA5P022177	0.0204506	0.0614166	3.16826	down	noncoding	ENST00000551401	RP11-121G22.3	GENCODE	792	chr12	+	81676462	81706188	CCAGTCATTGGTCAGAGGCAGTGCAGCTTGTGTTACAACTCAAAAGAGTAATACTCTGAA	intronic antisense	NM_001220474	PPFIA2	liprin-alpha-2 isoform c	-	81652044	82152474	3.83576	5.49946
ASHGA5P022177	0.0204506	0.0614166	3.16826	down	noncoding	ENST00000551401	RP11-121G22.3	GENCODE	792	chr12	+	81676462	81706188	CCAGTCATTGGTCAGAGGCAGTGCAGCTTGTGTTACAACTCAAAAGAGTAATACTCTGAA	intronic antisense	NM_001220475	PPFIA2	liprin-alpha-2 isoform d	-	81652044	82152286	3.83576	5.49946
ASHGA5P022177	0.0204506	0.0614166	3.16826	down	noncoding	ENST00000551401	RP11-121G22.3	GENCODE	792	chr12	+	81676462	81706188	CCAGTCATTGGTCAGAGGCAGTGCAGCTTGTGTTACAACTCAAAAGAGTAATACTCTGAA	intronic antisense	NM_001220476	PPFIA2	liprin-alpha-2 isoform e	-	81652044	82152286	3.83576	5.49946
ASHGA5P022177	0.0204506	0.0614166	3.16826	down	noncoding	ENST00000551401	RP11-121G22.3	GENCODE	792	chr12	+	81676462	81706188	CCAGTCATTGGTCAGAGGCAGTGCAGCTTGTGTTACAACTCAAAAGAGTAATACTCTGAA	intronic antisense	NM_001220477	PPFIA2	liprin-alpha-2 isoform f	-	81652044	81992150	3.83576	5.49946
ASHGA5P022177	0.0204506	0.0614166	3.16826	down	noncoding	ENST00000551401	RP11-121G22.3	GENCODE	792	chr12	+	81676462	81706188	CCAGTCATTGGTCAGAGGCAGTGCAGCTTGTGTTACAACTCAAAAGAGTAATACTCTGAA	intronic antisense	NM_001220478	PPFIA2	liprin-alpha-2 isoform g	-	81652044	81992150	3.83576	5.49946
ASHGA5P022177	0.0204506	0.0614166	3.16826	down	noncoding	ENST00000551401	RP11-121G22.3	GENCODE	792	chr12	+	81676462	81706188	CCAGTCATTGGTCAGAGGCAGTGCAGCTTGTGTTACAACTCAAAAGAGTAATACTCTGAA	intronic antisense	NM_001220479	PPFIA2	liprin-alpha-2 isoform h	-	81652044	81763193	3.83576	5.49946
ASHGA5P022177	0.0204506	0.0614166	3.16826	down	noncoding	ENST00000551401	RP11-121G22.3	GENCODE	792	chr12	+	81676462	81706188	CCAGTCATTGGTCAGAGGCAGTGCAGCTTGTGTTACAACTCAAAAGAGTAATACTCTGAA	intronic antisense	NM_001220480	PPFIA2	liprin-alpha-2 isoform i	-	81652044	81763193	3.83576	5.49946
ASHGA5P022177	0.0204506	0.0614166	3.16826	down	noncoding	ENST00000551401	RP11-121G22.3	GENCODE	792	chr12	+	81676462	81706188	CCAGTCATTGGTCAGAGGCAGTGCAGCTTGTGTTACAACTCAAAAGAGTAATACTCTGAA	intronic antisense	NM_003625	PPFIA2	liprin-alpha-2 isoform a	-	81652044	82153109	3.83576	5.49946
ASHGA5P031265	0.00327262	0.0214172	3.16505	down	noncoding	TCONS_00006934	XLOC_002775	LincRNAs identified by Cabili et al	473	chr3	+	118207644	118212448	TTACTTTAGAGAAGTCTGAACTTGCCCTTTTTTTCATCTTTATGCCTGAGGAAATTTTTC	intergenic							5.07018	6.73241
ASHGA5P049395	0.00041932	0.0074576	3.16502	down	noncoding	ENST00000568070	FAM157C	GENCODE	480	chr16	+	90172868	90244014	GGCGCCGTCATCCCTACAGGGACACCTGAGAGGGCCCAGCCTCCTCCTCCTCAGGACCTA	intergenic							6.07678	7.739
ASHGA5P055890	0.00381001	0.0234582	3.16483	down	noncoding	TCONS_00003962	XLOC_001780	LincRNAs identified by Cabili et al	287	chr2	+	186031548	186061503	AAACCTTGTCTCTCCCAAGTACCTTCTGTCTCTGGCAGCTCCATGTAAACTTCAGGAATG	intergenic							5.3203	6.98242
ASHGA5P037860	7.73768e-05	0.00297752	3.16342	down	noncoding	ENST00000438893	AP000356.2	GENCODE	364	chr22	+	24994020	24995365	CCTCAGACATACTTTATCATCCCTTAAAGTCAGTAGCTCAAAGGAAACTTTAAAAGCTAT	intron sense-overlapping	NM_013430	GGT1	gamma-glutamyltranspeptidase 1 precursor	+	24979717	25024972	2.78168	4.44317
ASHGA5P037821	0.0196433	0.0601964	3.15876	down	noncoding	uc002zul.4	AK128837	UCSC_knowngene	3266	chr22	+	21538002	21546445	AGCTAATGAGGTTGCTGTATATGACATCGCTAATGAGGACATTGTATATGACATCGCTAA	intergenic							3.42051	5.07986
ASHGA5P022155	0.00200106	0.0165635	3.15546	down	noncoding	ENST00000550680	RP11-1103G16.1	GENCODE	471	chr14	-	30907211	30943433	TTTTTGCTGCTTCTTTCCCTACCTCCTCATTTCCGAAGAACTAAGGTTAAACCATGACCA	intergenic							5.07594	6.73379
ASHGA5P035851	0.0176752	0.0569502	3.15407	down	noncoding	ENST00000417692	AC079807.2	GENCODE	656	chr2	+	48133968	48134949	CCCCTCACCTCCCAAGTTTAAATAAGAACTTATTTTAGACTACATGATCCTGTTTTCAAT	intergenic							7.18259	8.8398
ASHGA5P017792	0.00141226	0.0138096	3.15293	down	noncoding	NR_037672	SERF2	RefSeq	2477	chr15	+	44084173	44088287	TTTGTGCTTCCTTCCCCTCAGTTTGTTCGTCTGCTTGAAAGTTGGCCAAAAAATCCTGCT	exon sense-overlapping	NM_001018108	SERF2	small EDRK-rich factor 2 isoform c	+	44084039	44088287	7.54578	9.20247
ASHGA5P017792	0.00141226	0.0138096	3.15293	down	noncoding	NR_037672	SERF2	RefSeq	2477	chr15	+	44084173	44088287	TTTGTGCTTCCTTCCCCTCAGTTTGTTCGTCTGCTTGAAAGTTGGCCAAAAAATCCTGCT	exon sense-overlapping	NM_001199875	SERF2	small EDRK-rich factor 2 isoform a	+	44084173	44088287	7.54578	9.20247
ASHGA5P017792	0.00141226	0.0138096	3.15293	down	noncoding	NR_037672	SERF2	RefSeq	2477	chr15	+	44084173	44088287	TTTGTGCTTCCTTCCCCTCAGTTTGTTCGTCTGCTTGAAAGTTGGCCAAAAAATCCTGCT	exon sense-overlapping	NM_001199876	SERF2	small EDRK-rich factor 2 isoform b	+	44084173	44088287	7.54578	9.20247
ASHGA5P017792	0.00141226	0.0138096	3.15293	down	noncoding	NR_037672	SERF2	RefSeq	2477	chr15	+	44084173	44088287	TTTGTGCTTCCTTCCCCTCAGTTTGTTCGTCTGCTTGAAAGTTGGCCAAAAAATCCTGCT	exon sense-overlapping	NM_001199877	SERF2	small EDRK-rich factor 2 isoform c	+	44069293	44088287	7.54578	9.20247
ASHGA5P017792	0.00141226	0.0138096	3.15293	down	noncoding	NR_037672	SERF2	RefSeq	2477	chr15	+	44084173	44088287	TTTGTGCTTCCTTCCCCTCAGTTTGTTCGTCTGCTTGAAAGTTGGCCAAAAAATCCTGCT	exon sense-overlapping	NM_001199878	SERF2	small EDRK-rich factor 2 isoform d	+	44084574	44088287	7.54578	9.20247
ASHGA5P017792	0.00141226	0.0138096	3.15293	down	noncoding	NR_037672	SERF2	RefSeq	2477	chr15	+	44084173	44088287	TTTGTGCTTCCTTCCCCTCAGTTTGTTCGTCTGCTTGAAAGTTGGCCAAAAAATCCTGCT	natural antisense	NM_001258031	SERINC4	serine incorporator 4 isoform 1	-	44086371	44092295	7.54578	9.20247
ASHGA5P017792	0.00141226	0.0138096	3.15293	down	noncoding	NR_037672	SERF2	RefSeq	2477	chr15	+	44084173	44088287	TTTGTGCTTCCTTCCCCTCAGTTTGTTCGTCTGCTTGAAAGTTGGCCAAAAAATCCTGCT	natural antisense	NM_001258032	SERINC4	serine incorporator 4 isoform 3	-	44086371	44092295	7.54578	9.20247
ASHGA5P045669	0.00270699	0.0191861	3.13962	down	noncoding	TCONS_00001838	XLOC_001223	LincRNAs identified by Cabili et al	1129	chr1	-	224151307	224159470	AATTACTGGCTCAATGTAATGGCTCCATCTCAGGAACAGCCAATGAAAGAGATGCACAGG	intergenic							3.16289	4.81348
ASHGA5P036659	0.000808205	0.010616	3.13834	down	noncoding	ENST00000456265	RP5-1069C8.2	GENCODE	3033	chr20	-	12845849	12933167	GTCCAAAGGCTTTCTCTCACCCTTTTATATTTCACAGTTTTTACCTCAATAAATCCCTGA	intergenic							3.89775	5.54775
ASHGA5P039517	0.00417128	0.0246767	3.1382	down	noncoding	ENST00000515150	EMCN-IT1	GENCODE	481	chr4	-	101733411	101735437	ACTCCACCACCTTTGTGATACTCTACAGAAATTATAATATGGTTAGAGAAGGAGAAGATA	intergenic							4.63118	6.28112
ASHGA5P023610	0.00024761	0.00560251	3.13599	down	noncoding	HMlincRNA1052+	HMlincRNA1052	LincRNAs identified by Khalil et al	10575	chr1	+	98805012	98815587	GCACCTCTTTCTTGGTTATGAATTTTTACTTGTCTCATGTCTGTCTTGAAGAAGTGTGAA	intergenic							3.23949	4.88841
ASHGA5P047475	0.0394124	0.0888562	3.13044	down	noncoding	ENST00000432960	RP11-710A11.2	GENCODE	312	chr10	+	72307688	72316552	GGCTGGCTCCCAGATGGGGTGTTTTTTATCTGTAAAAATTGTTTTTAAATAACTCATTAC	intron sense-overlapping	NM_014431	PALD1	paladin	+	72238563	72328206	4.71635	6.36271
ASHGA5P032912	0.0371206	0.0858513	3.12619	down	noncoding	ENST00000584365	RP11-160E2.21	GENCODE	191	chr17	+	19053591	19054599	ATTGTTTTAGTAAACAGACACAACCTTGGCTTCAGGTCTTTTTTGTTTTCTGTCACCCAG	intron sense-overlapping	NM_001129778	GRAPL	GRB2-related adapter protein-like	+	19030781	19062148	4.77513	6.41954
ASHGA5P023925	0.0353223	0.0833009	3.12522	down	noncoding	HMlincRNA970-	HMlincRNA970	LincRNAs identified by Khalil et al	8480	chr3	-	181954931	181963411	TTAAGCCCTTTTCCTTCCATGTTCTTACAATATTCCCGAAAACCATTCCTAGCACTCCCT	intergenic							6.47493	8.11889
ASHGA5P018041	0.00267195	0.0190654	3.12485	down	noncoding	ENST00000448685	RP11-536K7.3	GENCODE	510	chr10	-	5985452	5987701	CACCATGAAGAGTTATAGTAAGGTGTTGGTGAGGCTGGCTGCTCTGGTTGCTAAGAGAGA	intergenic							4.32809	5.97188
ASHGA5P027810	0.00132341	0.0135741	3.11674	down	noncoding	TCONS_00010831	XLOC_004632	LincRNAs identified by Cabili et al	621	chr5	+	171962066	171963089	ATAAACGTACTGACTGAGACTCATGCACACACACATGACAGAGGGACAGAAGCTCTATGA	intergenic							4.2723	5.91234
ASHGA5P034897	0.0107614	0.0424973	3.10287	down	noncoding	ENST00000420452	MYCNOS	GENCODE	1313	chr2	-	16076386	16081704	CAGTTTCTCCTAGGATCTTCACACCTCCCTCAAAATGTGTACATTTTTACTGATTAAATA	intronic antisense	NM_005378	MYCN	N-myc proto-oncogene protein	+	16080682	16087129	5.47551	7.10912
ASHGA5P029506	0.00203175	0.0166531	3.10216	down	noncoding	TCONS_00008217	XLOC_003679	LincRNAs identified by Cabili et al	470	chr4	+	124247729	124249559	TTTGCCATTCCAGCTGCTCCAACTAAGACTTCCGAGGTTCAGTCTAGAGAGAAATCAAGT	intergenic							4.27149	5.90476
ASHGA5P032037	0.0036915	0.0229996	3.10149	down	noncoding	ENST00000561805	FAM157C	GENCODE	519	chr16	+	90213065	90223009	GCTGTGTAACATAGGACATGAGCAATTGGTGGCGGTGGGGGTTATTACTTTGGCCACCAC	intergenic							3.97166	5.60463
ASHGA5P017111	0.0316129	0.0787194	3.09672	down	noncoding	uc002tss.3	LOC389043	UCSC_knowngene	1040	chr2	+	132160473	132165801	ATTCCAGACCATTCCTGTGTGCACCCTGGCAGGGAGCCATCTGAAGATTTCAGGGACCAC	intergenic							8.16404	9.79478
ASHGA5P038880	0.000140375	0.00412229	3.09155	down	noncoding	NR_040005	LOC401074	RefSeq	1282	chr3	+	75721431	75728454	CGGGCCGCCGCTTGGGTTTCTCTCGTGTTCAGGGTAGTATGGACGTGGACAATGGCAGTG	intergenic							4.75875	6.38708
ASHGA5P025947	0.000666599	0.00970138	3.09073	down	noncoding	NR_047525	LOC643837	RefSeq	6490	chr1	+	763177	794826	ACGCGAGTCCTTTCTCTCCTGTCACAATGGCATGATCTCGGCTCACTGCGACCTCTGCTT	intergenic							4.91849	6.54644
ASHGA5P031238	0.00343479	0.0220866	3.07953	down	noncoding	ENST00000562846	CTD-2012K14.7	GENCODE	899	chr16	-	67595313	67596212	TTCTCCATCCATCTGACCGTTCCGTTGTGAGAATGCTGGCCCAATAACATACTCTTTTTT	bidirectional	NM_001191022	CTCF	transcriptional repressor CTCF isoform 2	+	67596309	67673088	6.23245	7.85516
ASHGA5P031238	0.00343479	0.0220866	3.07953	down	noncoding	ENST00000562846	CTD-2012K14.7	GENCODE	899	chr16	-	67595313	67596212	TTCTCCATCCATCTGACCGTTCCGTTGTGAGAATGCTGGCCCAATAACATACTCTTTTTT	bidirectional	NM_006565	CTCF	transcriptional repressor CTCF isoform 1	+	67596309	67673088	6.23245	7.85516
ASHGA5P056697	0.0210328	0.0623612	3.07197	down	noncoding	TCONS_00007914	XLOC_004186	LincRNAs identified by Cabili et al	701	chr4	-	180087669	180091246	CCCCTAGACCATCACGGACGCCAAGCTTCAGGTAACTCTCACAGTGGAAGAAGGCAGGAA	intergenic							5.74938	7.36854
ASHGA5P019949	0.00272574	0.0192545	3.0651	down	noncoding	NR_047649	SLC38A9	RefSeq	2658	chr5	-	54921672	54988881	TTCATTTCCTTCACCACCATTATCCAAAGATTGTATTGAGCAGGCTACCTGGCTCGTGTC	exon sense-overlapping	NM_001258286	SLC38A9	putative sodium-coupled neutral amino acid transporter 9 isoform 2	-	54921672	54988881	3.74574	5.36167
ASHGA5P019949	0.00272574	0.0192545	3.0651	down	noncoding	NR_047649	SLC38A9	RefSeq	2658	chr5	-	54921672	54988881	TTCATTTCCTTCACCACCATTATCCAAAGATTGTATTGAGCAGGCTACCTGGCTCGTGTC	exon sense-overlapping	NM_001258287	SLC38A9	putative sodium-coupled neutral amino acid transporter 9 isoform 3	-	54921672	54988881	3.74574	5.36167
ASHGA5P019949	0.00272574	0.0192545	3.0651	down	noncoding	NR_047649	SLC38A9	RefSeq	2658	chr5	-	54921672	54988881	TTCATTTCCTTCACCACCATTATCCAAAGATTGTATTGAGCAGGCTACCTGGCTCGTGTC	exon sense-overlapping	NM_173514	SLC38A9	putative sodium-coupled neutral amino acid transporter 9 isoform 1	-	54921672	55008163	3.74574	5.36167
ASHGA5P014830	0.0292506	0.0754706	3.06423	down	noncoding	ENST00000413794	RP11-114G22.1	GENCODE	565	chr12	+	22852792	23040977	CTTCTCTATTGTTGCCCTTCATCACTCAGCAGTGAAGAATGAAAATCAACAGAGCTTTCC	intergenic							7.12461	8.74014
ASHGA5P057935	0.00134288	0.0136076	3.06261	down	noncoding	TCONS_00023984	XLOC_011316	LincRNAs identified by Cabili et al	216	chr15	+	77991685	77992117	GCACACAATAAGCACATACTAACCATCATCCCCACACACAGTAAGTGCATACTAACCATC	intronic antisense	ENST00000561686	LINGO1	leucine rich repeat and Ig domain containing 1 [Source:HGNC Symbol;Acc:21205]	-	77907694	78079356	5.11438	6.72914
ASHGA5P057935	0.00134288	0.0136076	3.06261	down	noncoding	TCONS_00023984	XLOC_011316	LincRNAs identified by Cabili et al	216	chr15	+	77991685	77992117	GCACACAATAAGCACATACTAACCATCATCCCCACACACAGTAAGTGCATACTAACCATC	intronic antisense	ENST00000562933	LINGO1	leucine rich repeat and Ig domain containing 1 [Source:HGNC Symbol;Acc:21205]	-	77908195	78112674	5.11438	6.72914
ASHGA5P057935	0.00134288	0.0136076	3.06261	down	noncoding	TCONS_00023984	XLOC_011316	LincRNAs identified by Cabili et al	216	chr15	+	77991685	77992117	GCACACAATAAGCACATACTAACCATCATCCCCACACACAGTAAGTGCATACTAACCATC	intronic antisense	ENST00000563316	LINGO1	leucine rich repeat and Ig domain containing 1 [Source:HGNC Symbol;Acc:21205]	-	77908218	78113213	5.11438	6.72914
ASHGA5P057935	0.00134288	0.0136076	3.06261	down	noncoding	TCONS_00023984	XLOC_011316	LincRNAs identified by Cabili et al	216	chr15	+	77991685	77992117	GCACACAATAAGCACATACTAACCATCATCCCCACACACAGTAAGTGCATACTAACCATC	intronic antisense	ENST00000564472	LINGO1	leucine rich repeat and Ig domain containing 1 [Source:HGNC Symbol;Acc:21205]	-	77908123	78013093	5.11438	6.72914
ASHGA5P057935	0.00134288	0.0136076	3.06261	down	noncoding	TCONS_00023984	XLOC_011316	LincRNAs identified by Cabili et al	216	chr15	+	77991685	77992117	GCACACAATAAGCACATACTAACCATCATCCCCACACACAGTAAGTGCATACTAACCATC	intronic antisense	ENST00000566711	LINGO1	leucine rich repeat and Ig domain containing 1 [Source:HGNC Symbol;Acc:21205]	-	77908014	78111794	5.11438	6.72914
ASHGA5P057935	0.00134288	0.0136076	3.06261	down	noncoding	TCONS_00023984	XLOC_011316	LincRNAs identified by Cabili et al	216	chr15	+	77991685	77992117	GCACACAATAAGCACATACTAACCATCATCCCCACACACAGTAAGTGCATACTAACCATC	intronic antisense	ENST00000567726	LINGO1	leucine rich repeat and Ig domain containing 1 [Source:HGNC Symbol;Acc:21205]	-	77907854	77999849	5.11438	6.72914
ASHGA5P057935	0.00134288	0.0136076	3.06261	down	noncoding	TCONS_00023984	XLOC_011316	LincRNAs identified by Cabili et al	216	chr15	+	77991685	77992117	GCACACAATAAGCACATACTAACCATCATCCCCACACACAGTAAGTGCATACTAACCATC	intronic antisense	ENST00000570216	LINGO1	leucine rich repeat and Ig domain containing 1 [Source:HGNC Symbol;Acc:21205]	-	77908174	78113242	5.11438	6.72914
ASHGA5P016151	0.013311	0.0481146	3.06255	down	noncoding	ENST00000452942	RP11-429G19.2	GENCODE	746	chr10	-	97635156	97667639	CCGTGAGCGTCAGCTGGCTTGGCTTTTTCAGAGGAAACAGAGACTCTCAGACATGAATAC	natural antisense	NM_001098175	ENTPD1	ectonucleoside triphosphate diphosphohydrolase 1 isoform 2	+	97471535	97637023	4.62552	6.24025
ASHGA5P016151	0.013311	0.0481146	3.06255	down	noncoding	ENST00000452942	RP11-429G19.2	GENCODE	746	chr10	-	97635156	97667639	CCGTGAGCGTCAGCTGGCTTGGCTTTTTCAGAGGAAACAGAGACTCTCAGACATGAATAC	natural antisense	NM_001164178	ENTPD1	ectonucleoside triphosphate diphosphohydrolase 1 isoform 3	+	97515408	97637023	4.62552	6.24025
ASHGA5P016151	0.013311	0.0481146	3.06255	down	noncoding	ENST00000452942	RP11-429G19.2	GENCODE	746	chr10	-	97635156	97667639	CCGTGAGCGTCAGCTGGCTTGGCTTTTTCAGAGGAAACAGAGACTCTCAGACATGAATAC	natural antisense	NM_001164179	ENTPD1	ectonucleoside triphosphate diphosphohydrolase 1 isoform 4	+	97515672	97637023	4.62552	6.24025
ASHGA5P016151	0.013311	0.0481146	3.06255	down	noncoding	ENST00000452942	RP11-429G19.2	GENCODE	746	chr10	-	97635156	97667639	CCGTGAGCGTCAGCTGGCTTGGCTTTTTCAGAGGAAACAGAGACTCTCAGACATGAATAC	natural antisense	NM_001164181	ENTPD1	ectonucleoside triphosphate diphosphohydrolase 1 isoform 5	+	97515408	97637023	4.62552	6.24025
ASHGA5P016151	0.013311	0.0481146	3.06255	down	noncoding	ENST00000452942	RP11-429G19.2	GENCODE	746	chr10	-	97635156	97667639	CCGTGAGCGTCAGCTGGCTTGGCTTTTTCAGAGGAAACAGAGACTCTCAGACATGAATAC	natural antisense	NM_001164182	ENTPD1	ectonucleoside triphosphate diphosphohydrolase 1 isoform 6	+	97515672	97637023	4.62552	6.24025
ASHGA5P016151	0.013311	0.0481146	3.06255	down	noncoding	ENST00000452942	RP11-429G19.2	GENCODE	746	chr10	-	97635156	97667639	CCGTGAGCGTCAGCTGGCTTGGCTTTTTCAGAGGAAACAGAGACTCTCAGACATGAATAC	natural antisense	NM_001164183	ENTPD1	ectonucleoside triphosphate diphosphohydrolase 1 isoform 6	+	97515672	97637023	4.62552	6.24025
ASHGA5P016151	0.013311	0.0481146	3.06255	down	noncoding	ENST00000452942	RP11-429G19.2	GENCODE	746	chr10	-	97635156	97667639	CCGTGAGCGTCAGCTGGCTTGGCTTTTTCAGAGGAAACAGAGACTCTCAGACATGAATAC	natural antisense	NM_001776	ENTPD1	ectonucleoside triphosphate diphosphohydrolase 1 isoform 1	+	97515672	97637023	4.62552	6.24025
ASHGA5P056712	0.0293099	0.0755356	3.06184	down	noncoding	TCONS_00007998	XLOC_003461	LincRNAs identified by Cabili et al	491	chr4	+	13492920	13520604	TGCTGCTAAGAATGGGACTGTTTCAAGGGAAGGCTCCTTACAGTGAAGAAAAGGGTCAAA	intergenic							3.05845	4.67285
ASHGA5P045142	0.00209438	0.0168813	3.06009	down	noncoding	NR_038064	PLIN2	RefSeq	2116	chr9	-	19115758	19127604	CTTTCTCTCCTTTTGTGTTTTGAGAGATTAATAAGCATACCCTCCCTACTTTGATTGCAG	exon sense-overlapping	NM_001122	PLIN2	perilipin-2	-	19115758	19127604	7.40565	9.01923
ASHGA5P022289	0.00207723	0.0167994	3.05978	down	noncoding	ENST00000553961	ACTN1-AS1	GENCODE	599	chr14	+	69446398	69454180	AGGGTCTCAGAGAGAATCACCTCCATCCCACCTACCTCACAGGATGGCTGTGCACATTCA	bidirectional	NM_001102	ACTN1	alpha-actinin-1 isoform b	-	69340839	69446083	4.97989	6.59332
ASHGA5P022289	0.00207723	0.0167994	3.05978	down	noncoding	ENST00000553961	ACTN1-AS1	GENCODE	599	chr14	+	69446398	69454180	AGGGTCTCAGAGAGAATCACCTCCATCCCACCTACCTCACAGGATGGCTGTGCACATTCA	bidirectional	NM_001130004	ACTN1	alpha-actinin-1 isoform a	-	69340839	69446083	4.97989	6.59332
ASHGA5P022289	0.00207723	0.0167994	3.05978	down	noncoding	ENST00000553961	ACTN1-AS1	GENCODE	599	chr14	+	69446398	69454180	AGGGTCTCAGAGAGAATCACCTCCATCCCACCTACCTCACAGGATGGCTGTGCACATTCA	bidirectional	NM_001130005	ACTN1	alpha-actinin-1 isoform c	-	69340839	69446083	4.97989	6.59332
ASHGA5P000493	0.0339184	0.0816254	3.05407	down	noncoding	chr7:1314975-1333125-	chr7:1314975-1333125	LincRNAs identified by Khalil et al	18150	chr7	-	1348449	1366599	GGTGGAGGCTGGCTAGGAGTGTGGGGACAGACATCGAATAATAATAATACTTCAATATAA	intergenic							4.16547	5.7762
ASHGA5P000086	0.00799226	0.035399	3.0521	down	noncoding	AY203949R		LincRNAs identified by Khalil et al	1269	chr3	+	129080559	129082577	CCCACCTCCCTCCCGGACGGGGTGGCTGCAGGCGGAGGGGCTCCTCACTTCTCTGACGTG	intergenic							7.66578	9.27558
ASHGA5P048367	0.000151291	0.00434597	3.04901	down	noncoding	TCONS_00013917	XLOC_006554	LincRNAs identified by Cabili et al	626	chr7	-	104653772	104654516	GCCGCCCGCCGTTGCCTCTCCGCGGAGGCTCGAAGATAGCAAACTGGAGGCGGTGAGGGG	intergenic							6.68188	8.29022
ASHGA5P037123	0.00410867	0.0244679	3.04821	down	noncoding	ENST00000442780	RP11-560A15.4	GENCODE	377	chr20	+	55680796	55682184	AGATGGTTCAAGGGTTGTGTGTGTTTCCTCTGCCTGCTGTAATAAATTACTACAAACTAA	intergenic							3.99948	5.60744
ASHGA5P016951	0.00522405	0.0280925	3.04484	down	noncoding	ENST00000449573	AC005062.2	GENCODE	804	chr7	-	19958614	20042545	TGATAATGAGACTCCGCTTTCTGTCTCTCTGAAGATAACGTTAAGCTGCAGCTCCGTATC	intergenic							3.83749	5.44386
ASHGA5P029384	0.021456	0.0628879	3.03587	down	noncoding	ENST00000479229	RP11-731F5.1	GENCODE	497	chr14	-	106067993	106069282	AAGCTGGTTGAGCTGGCTGGACTGAAATAAGAGTTTGCTGCCTGCAAGGGGAGGTCCTGG	intergenic							5.48276	7.08487
ASHGA5P055201	0.0084068	0.0364971	3.03056	down	noncoding	ENST00000534782	RP11-820L6.1	GENCODE	444	chr11	-	122026258	122073770	TTCTCCTCCTGTCCTGTAACTGGTTTTCACTCACTCAACTGAGAGATTTCTTTGTTGCAA	intergenic							5.32448	6.92407
ASHGA5P040273	0.0196924	0.0602384	3.02781	down	noncoding	ENST00000503677	RP11-91J3.3	GENCODE	536	chr4	+	188334717	188336851	GGATTATGAACTAAAGTCAGTGTTGCAGGAAATGTCACCTGTCCTTTGAAAGAAAATAAT	intergenic							2.80267	4.40095
ASHGA5P035053	0.0257676	0.0703384	3.02747	down	noncoding	NR_033980	FLJ16341	RefSeq	1705	chr2	-	61074894	61108449	GGATTTCCCCCGGGAGCTCTTTTTGCGAAGGATGTTTTGTTTTTCCTTTGTGAATAGGGA	bidirectional	NM_002908	REL	proto-oncogene c-Rel	+	61108751	61150178	4.06799	5.66611
ASHGA5P023070	0.0071436	0.0332685	3.02288	down	noncoding	ENST00000568972	RP11-586K12.11	GENCODE	358	chr16	+	32660513	32661722	TGCATGAACTTTTAAGACAAACACAAGGCCCCACAAAAGGGTTCCAGGCAAGTCAGTTCT	intergenic							3.78808	5.38401
ASHGA5P026193	0.0348021	0.0826882	3.02164	down	noncoding	ENST00000532930	RP11-318C2.1	GENCODE	850	chr11	+	8790324	8807318	CCCTCATACACATTCAGAAGGCCAAGGAAACACCCTCAGGATTGAACTATGATAAAGAAG	intronic antisense	NM_005418	ST5	suppression of tumorigenicity 5 protein isoform 1	-	8714898	8932498	4.42089	6.01622
ASHGA5P026193	0.0348021	0.0826882	3.02164	down	noncoding	ENST00000532930	RP11-318C2.1	GENCODE	850	chr11	+	8790324	8807318	CCCTCATACACATTCAGAAGGCCAAGGAAACACCCTCAGGATTGAACTATGATAAAGAAG	intronic antisense	NM_139157	ST5	suppression of tumorigenicity 5 protein isoform 2	-	8714898	8832882	4.42089	6.01622
ASHGA5P026193	0.0348021	0.0826882	3.02164	down	noncoding	ENST00000532930	RP11-318C2.1	GENCODE	850	chr11	+	8790324	8807318	CCCTCATACACATTCAGAAGGCCAAGGAAACACCCTCAGGATTGAACTATGATAAAGAAG	intronic antisense	NM_213618	ST5	suppression of tumorigenicity 5 protein isoform 1	-	8714898	8832224	4.42089	6.01622
ASHGA5P047569	0.0217941	0.06352	3.0149	down	noncoding	TCONS_00014180	XLOC_006188	LincRNAs identified by Cabili et al	313	chr7	+	99597122	99609247	CATGCCCGGCCCTCCCTTTCTTTTGTGTCTTTGGATTTGTCTTTGTGGAGAGGGTACCAG	intergenic							7.64472	9.23683
ASHGA5P038845	0.000660712	0.00965898	3.01436	down	noncoding	ENST00000464125	RP11-475O23.3	GENCODE	821	chr3	+	58592806	58620167	ACTAGAGAGAGAGAAGACAGAGAAATATAGGCAGTGAGTGAGGCTGTTCAGAACTCATGC	natural antisense	NM_138805	FAM3D	protein FAM3D precursor	-	58619669	58652561	2.92041	4.51226
ASHGA5P044378	0.0170356	0.0557236	3.01233	down	noncoding	ENST00000440763	AF121898.3	GENCODE	709	chr8	-	88554213	88767923	TATATGTTATGGATAGTTTGTATGTATGTGTGTGGTGGGGATGGTATGAATGCATGTGCT	intronic antisense	ENST00000521593	CNBD1	cyclic nucleotide binding domain containing 1 [Source:HGNC Symbol;Acc:26663]	+	88363960	88627447	3.97504	5.56592
ASHGA5P020394	0.0279483	0.0736106	3.00997	down	noncoding	ENST00000512735	RP11-152F13.1	pseudogene	1343	chr15	+	83188642	83195200	CGAGGAGCTGGCTTGGGTGGAGAAGCTGTTGGTACAGGAGAGGCGGCAGGAGGAGCAGGA								4.95051	6.54026
ASHGA5P030699	0.00803905	0.0355106	3.00967	down	noncoding	uc010bls.1	LOC390660	UCSC_knowngene	2700	chr15	+	82619907	82623844	TTGGGAGTCATCTCATCTTTGTCTGGCTTGGCCTGTCTCCTTTCCTCTGTATCTTTGACC	intergenic							5.06166	6.65127
ASHGA5P043107	0.00441039	0.0254335	3.00692	down	noncoding	uc003tvq.3	PMS2P4	UCSC_knowngene	722	chr7	-	66752526	66767406	TCCTCTTCTCCTTCCTGGTGTCTGCCATTAGCATTGGAATAAAGTTCCTGCTGAAAATCC	intergenic							8.62484	10.2131
ASHGA5P054425	0.0246281	0.0685468	3.00423	down	noncoding	ENST00000419779	RP11-508N22.9	GENCODE	428	chr10	+	38453575	38466958	CACAATATTCCTGAGAAAATCTCAAATAGATGGTGAGACAACATTGTTTTTTCTGCCAAG	intergenic							2.8062	4.3932
ASHGA5P000374	0.0176579	0.0569313	3.00229	down	noncoding	chr2:90959050-90986900+	chr2:90959050-90986900	LincRNAs identified by Khalil et al	27850	chr2	+	91595323	91623173	TATATGGATCACTTGTTTCTGTTGAGTTACAGATTCAGCTGGCTATTTCTCCCAATGTTA	intergenic							3.91475	5.50081
ASHGA5P039296	0.00157779	0.0145573	3.00101	down	noncoding	TCONS_00024148	XLOC_011515	LincRNAs identified by Cabili et al	1210	chr15	-	68776650	68779860	GGAATGCAAACTAGGAATATAAATAAACTTTCTTTTTTCTCTGTTGCTCTCCTTCCTTCC	intergenic							3.73229	5.31774
ASHGA5P042018	0.00647727	0.0313692	2.99731	down	noncoding	ENST00000430672	RP11-138M12.1	GENCODE	281	chr6	-	125746772	125766329	CTATGGATACAAAAAGTTCAGCATGACAAGATCTACTGTTCTCCCACATAATTTTTCATG	intergenic							3.08642	4.67008
ASHGA5P049432	0.00609361	0.030463	2.99683	down	noncoding	ENST00000577064	RP13-580F15.2	GENCODE	575	chr17	-	4385442	4386879	TTAGGTCCAGGTAGGCTGGCCCCTTCCTCCTCTCCCAGGAACCCCAACCTGCTGGGCCCA	intronic antisense	NM_182538	SPNS3	protein spinster homolog 3	+	4337218	4391499	9.37967	10.9631
ASHGA5P027676	0.0113749	0.043819	2.98391	down	noncoding	ENST00000545853	RP11-407A16.3	GENCODE	456	chr12	-	127094579	127174806	GAGAAGAAAAAGGCCTCCTGCCTCCTCTTCTTTCACCAGACACTGTGGGCCCACAATTCC	intergenic							6.43027	8.00747
ASHGA5P029647	0.00090276	0.0110338	2.9791	down	noncoding	ENST00000555972	RP3-414A15.2	GENCODE	519	chr14	+	73989581	73997314	AATTTCTCACCATGCACTCACACAGCTATACAGCTGTCTCCAGAGATTACTCTGGAAACT	natural antisense	NM_001220484	HEATR4	HEAT repeat-containing protein 4	-	73945188	74025651	2.81308	4.38795
ASHGA5P029647	0.00090276	0.0110338	2.9791	down	noncoding	ENST00000555972	RP3-414A15.2	GENCODE	519	chr14	+	73989581	73997314	AATTTCTCACCATGCACTCACACAGCTATACAGCTGTCTCCAGAGATTACTCTGGAAACT	natural antisense	NM_203309	HEATR4	HEAT repeat-containing protein 4	-	73945188	74025651	2.81308	4.38795
ASHGA5P031699	0.00152257	0.0143604	2.97856	down	noncoding	ENST00000567043	AC002519.6	pseudogene	781	chr16	+	31817186	31817967	AACCAGGCTGCGATCATGGAACTAGATGACGCTTTAAGATATTCCTTCCTTCAGTTTGAC								3.48024	5.05486
ASHGA5P034000	0.023395	0.0661428	2.9707	down	noncoding	ENST00000455464	RP4-669L17.4	GENCODE	573	chr1	+	334139	342806	TAAGCTGAATGTACGTATAAAATATGATTTTCTAACCACTTGCTCGCCAACAAGGAAAAC	intergenic							4.18263	5.75343
ASHGA5P031791	0.00485387	0.026833	2.96967	down	noncoding	ENST00000576365	RP11-212I21.4	GENCODE	3828	chr16	+	55572111	55575939	CACACACACCCTACATATATACTTGTTCTAACAAAGCTAATTTCTTCTGGAACTTGGTAA	intron sense-overlapping	NM_017839	LPCAT2	lysophosphatidylcholine acyltransferase 2	+	55542912	55620582	5.37067	6.94098
ASHGA5P029651	0.00029021	0.00607742	2.96762	down	noncoding	TCONS_00008929	XLOC_003772	LincRNAs identified by Cabili et al	2060	chr4	+	170860020	170862823	TATAATGATATAATCTTCCTCATCCTCCCTCACTCGACTGAGTGGTGATGGACAGTGGAG	intergenic							5.26408	6.83339
ASHGA5P000218	0.00405667	0.0243609	2.9666	down	noncoding	chr11:8260275-8275625+	chr11:8260275-8275625	LincRNAs identified by Khalil et al	15350	chr11	+	8303699	8319049	GCATTATCACCCCCATCCATTCTTCCTAATCTAAAGAAGAGAAGGCCAAAGTGGACAACA	intergenic							6.43629	8.0051
ASHGA5P019389	0.00200362	0.0165699	2.96574	down	noncoding	NR_040087	SETD4	RefSeq	2893	chr21	-	37406839	37432816	AAACATCCCTGCAGGTGGAAGCCTCCTCCATCTCCTCTGCTGGCGCTGTGCACCTTTTTA	exon sense-overlapping	NM_001007259	SETD4	SET domain-containing protein 4 isoform 2	-	37415981	37432611	6.74218	8.31057
ASHGA5P019389	0.00200362	0.0165699	2.96574	down	noncoding	NR_040087	SETD4	RefSeq	2893	chr21	-	37406839	37432816	AAACATCCCTGCAGGTGGAAGCCTCCTCCATCTCCTCTGCTGGCGCTGTGCACCTTTTTA	exon sense-overlapping	NM_017438	SETD4	SET domain-containing protein 4 isoform 1	-	37406838	37432816	6.74218	8.31057
ASHGA5P057150	9.13908e-05	0.00325803	2.95781	down	noncoding	TCONS_00013774	XLOC_006402	LincRNAs identified by Cabili et al	341	chr7	-	31537025	31539781	ATGCATTGATCGGTTCTCATGTGACAGGCGTCCTACTCCATTCCTGGGGAGCAGTGGTGG	intergenic							3.94793	5.51246
ASHGA5P044909	0.0192669	0.0596374	2.95513	down	noncoding	ENST00000518266	CTA-392E5.1	GENCODE	371	chr8	+	86901751	86963312	GTCCAGAACATTGCGCCTAAATGAATCTAACAAGAGGTAAGTTGAACATAATATTGGTAT	intergenic							3.09249	4.65571
ASHGA5P037493	0.00615902	0.030635	2.9535	down	noncoding	TCONS_00024509	XLOC_011826	LincRNAs identified by Cabili et al	298	chr16	+	88219138	88219657	TGAATATAGTATATGCACACACACACTTATGTGCGCAGACCCACAGACACACACATTCAC	intergenic							5.07948	6.6419
ASHGA5P040185	0.0168687	0.0554464	2.94568	down	noncoding	ENST00000458155	BX004987.5	GENCODE	1410	chr1	+	143391567	143399528	GAGTTTGACATACTCAAATTGCCCAAATTTCAGCTGTTTAAACAACCAAGTCATCATTGA	intergenic							2.81166	4.37026
ASHGA5P036800	0.0316926	0.0787277	2.94452	down	noncoding	ENST00000452971	RP11-329N22.1	GENCODE	790	chr1	+	38940867	38942156	CTCTCTTCTTCCAACCAGCCAATATTTTTTGTCTTTCTAGAAAACCTGTCTTGTTCAAAG	intergenic							3.28601	4.84404
ASHGA5P034676	0.0021126	0.0169541	2.94426	down	noncoding	uc002ped.1	DKFZp434J0226	UCSC_knowngene	1316	chr19	+	46706682	46715832	AAAGATACAGGATCTTCCACACACACAGATCTGACCACATACATCCCCTGCTGGGAATAA	intergenic							4.38161	5.93951
ASHGA5P022121	0.012516	0.04651	2.94411	down	noncoding	ENST00000549723	RP11-887P2.1	GENCODE	354	chr12	-	93960514	93965066	GCCCTCCCCGAGTTTGCCATCTCCGTACCACCACCACCACCACACACAGCACCCTCAAGA	intronic antisense	NM_001270467	SOCS2	suppressor of cytokine signaling 2	+	93964174	93970521	10.2455	11.8033
ASHGA5P022121	0.012516	0.04651	2.94411	down	noncoding	ENST00000549723	RP11-887P2.1	GENCODE	354	chr12	-	93960514	93965066	GCCCTCCCCGAGTTTGCCATCTCCGTACCACCACCACCACCACACACAGCACCCTCAAGA	intronic antisense	NM_001270468	SOCS2	suppressor of cytokine signaling 2	+	93964756	93970521	10.2455	11.8033
ASHGA5P022121	0.012516	0.04651	2.94411	down	noncoding	ENST00000549723	RP11-887P2.1	GENCODE	354	chr12	-	93960514	93965066	GCCCTCCCCGAGTTTGCCATCTCCGTACCACCACCACCACCACACACAGCACCCTCAAGA	intronic antisense	NM_003877	SOCS2	suppressor of cytokine signaling 2	+	93963597	93970521	10.2455	11.8033
ASHGA5P023287	0.000122778	0.00380488	2.94259	down	noncoding	uc002kmp.3	LOC339290	UCSC_knowngene	3370	chr18	+	5240988	5246505	GTATTTTCAGATCCTTTGCACATGGCCTGCTATCAACAATCCTCTACAATGATTCTCAGC	intergenic							2.52574	4.08283
ASHGA5P027647	0.00181147	0.0157125	2.93907	down	noncoding	ENST00000536910	RP11-87C12.4	GENCODE	434	chr12	-	122337853	122338900	AAATGAGCCCCAAGAAGAGATCCTCTCCCTCTCTTGGGACATTTATCATCTTCTGTCACT	intronic antisense	NM_001261400	PSMD9	26S proteasome non-ATPase regulatory subunit 9 isoform 2	+	122326636	122355771	5.72211	7.27747
ASHGA5P027647	0.00181147	0.0157125	2.93907	down	noncoding	ENST00000536910	RP11-87C12.4	GENCODE	434	chr12	-	122337853	122338900	AAATGAGCCCCAAGAAGAGATCCTCTCCCTCTCTTGGGACATTTATCATCTTCTGTCACT	intronic antisense	NM_002813	PSMD9	26S proteasome non-ATPase regulatory subunit 9 isoform 1	+	122326636	122355771	5.72211	7.27747
ASHGA5P000171	0.0325437	0.0797709	2.9386	down	noncoding	chr1:47977525-47990050-	chr1:47977525-47990050	LincRNAs identified by Khalil et al	12525	chr1	-	48204938	48217463	ACCCACCCAGCCACTTGATTTTTCCCACCTTTAAGTTCCTATGGTACTTACTTCTGGTGA	intergenic							6.31147	7.8666
ASHGA5P014580	0.0022282	0.0174009	2.93363	down	noncoding	ENST00000411525	LINC00422	GENCODE	664	chr13	-	21899763	21922860	ATTCTTCCTAGATGATGCCGTCTGCCACGGGTCCCTTCCTCTCTCCAGCTGTCTGGAATG	intergenic							6.16225	7.71494
ASHGA5P036751	0.00247045	0.0182946	2.93048	down	noncoding	ENST00000416903	RP3-477O4.14	GENCODE	477	chr20	-	34064198	34069012	GTTCTCCTCCTCTAACTACTGGCCAAAAAGGGAAGGGAGTACAAGCATCAAAGACAAATG	natural antisense	NM_007186	CEP250	centrosome-associated protein CEP250	+	34043222	34099803	4.99159	6.54273
ASHGA5P027637	0.00464326	0.0262189	2.92055	down	noncoding	NR_046105	MIR137HG	RefSeq	2469	chr1	-	98453555	98515249	ATTGCATTAGATGATTTTTTCCCTTCCCCACTCCTTTCTGGAAGCTCGCATCAGCTGAAG	intergenic							6.72805	8.27429
ASHGA5P047828	0.00783379	0.0348971	2.92021	down	noncoding	NR_024567	LOC100130557	RefSeq	3182	chr1	-	41154751	41157933	GCTATAGTCTTTATTATCAATAGCCTCCGCCCTTCCCTTTCTAAAGCCGTTGCTATCTGG	natural antisense	NM_001142587	NFYC	nuclear transcription factor Y subunit gamma isoform 3	+	41157241	41237275	7.39851	8.94458
ASHGA5P047828	0.00783379	0.0348971	2.92021	down	noncoding	NR_024567	LOC100130557	RefSeq	3182	chr1	-	41154751	41157933	GCTATAGTCTTTATTATCAATAGCCTCCGCCCTTCCCTTTCTAAAGCCGTTGCTATCTGG	natural antisense	NM_001142588	NFYC	nuclear transcription factor Y subunit gamma isoform 1	+	41157241	41237275	7.39851	8.94458
ASHGA5P047828	0.00783379	0.0348971	2.92021	down	noncoding	NR_024567	LOC100130557	RefSeq	3182	chr1	-	41154751	41157933	GCTATAGTCTTTATTATCAATAGCCTCCGCCCTTCCCTTTCTAAAGCCGTTGCTATCTGG	natural antisense	NM_001142589	NFYC	nuclear transcription factor Y subunit gamma isoform 4	+	41157241	41237275	7.39851	8.94458
ASHGA5P047828	0.00783379	0.0348971	2.92021	down	noncoding	NR_024567	LOC100130557	RefSeq	3182	chr1	-	41154751	41157933	GCTATAGTCTTTATTATCAATAGCCTCCGCCCTTCCCTTTCTAAAGCCGTTGCTATCTGG	natural antisense	NM_001142590	NFYC	nuclear transcription factor Y subunit gamma isoform 5	+	41157679	41237275	7.39851	8.94458
ASHGA5P047828	0.00783379	0.0348971	2.92021	down	noncoding	NR_024567	LOC100130557	RefSeq	3182	chr1	-	41154751	41157933	GCTATAGTCTTTATTATCAATAGCCTCCGCCCTTCCCTTTCTAAAGCCGTTGCTATCTGG	natural antisense	NM_014223	NFYC	nuclear transcription factor Y subunit gamma isoform 2	+	41157241	41237275	7.39851	8.94458
ASHGA5P040365	0.0188898	0.0590049	2.91911	down	noncoding	ENST00000511029	CTD-2306M5.1	GENCODE	565	chr5	-	25404841	25422964	CACTTGCAGTGGAGATGATTCCATTGTAAAATGTTTCTTCATTCCCAATAGCACAATATA	intergenic							3.39353	4.93906
ASHGA5P055363	2.95188e-05	0.00170121	2.91802	down	noncoding	ENST00000549223	RP11-352M15.1	GENCODE	725	chr12	-	45993924	46004403	AGTGCTTTTAGAGGTAAAAGCTAAATGGAAATCTCTTTTTCTCCTCTTCCTTTCTCTTCT	intergenic							2.96552	4.51051
ASHGA5P058521	0.0135103	0.0485411	2.91651	down	noncoding	uc009vpu.2	LOC339505	UCSC_knowngene	2756	chr1	-	20686293	20732187	AGTTTCTCCTCCTCACAGACTGGATGATGAGAGGCACAGCTGAGTCCGGAGCAGACTGAG	intergenic							3.99767	5.54191
ASHGA5P048181	0.044167	0.0955065	2.91427	down	noncoding	TCONS_00013328	XLOC_005976	LincRNAs identified by Cabili et al	430	chr7	+	5834112	5850617	TTGTTCTGTTTTGTTTTTGTTTTTGTGGTGGTGGTGTTGCTTTTTGGGTTTAGGTTGCTT	intergenic							5.20589	6.74903
ASHGA5P041011	0.0030527	0.0205767	2.91323	down	noncoding	ENST00000511821	CTD-2139B15.2	GENCODE	867	chr5	+	17354018	17355008	CCCCACTGTGAAATGACTAAAATACCATCCACCACTCCTGCTCTGAGAATTAAAAGATAA	intergenic							5.45512	6.99774
ASHGA5P053131	0.006461	0.0313068	2.90904	down	noncoding	uc010lch.3	BC110795	UCSC_knowngene	1970	chr7	+	74698156	74704119	TTCTCACACTGACATCTGCTCTCTAATCACAGAGGATCCTGTCATTAAAAGACTCCTGGC	intergenic							3.93787	5.47841
ASHGA5P036045	0.0248162	0.0688211	2.89443	down	noncoding	ENST00000416057	AC108868.4	GENCODE	618	chr2	+	107103884	107120781	TGCTGGTGGCTGGCGTCCTGGTTCTGCTGGTTTCCCTGGGAGTGGCCATGCACCTGTGCT	intergenic							6.14929	7.68257
ASHGA5P036397	0.000985875	0.0115948	2.89416	down	noncoding	uc001bkd.1	AX747205	UCSC_knowngene	2415	chr1	-	25629228	25631643	CTGAGACTGATGATAACTTGCTATGTGTTCTTTTTTCTGCCCTTCCTCCTTTCATTTCAG	natural antisense	NM_001127691	RHD	blood group Rh(D) polypeptide isoform 2	+	25598980	25656936	5.68021	7.21335
ASHGA5P036397	0.000985875	0.0115948	2.89416	down	noncoding	uc001bkd.1	AX747205	UCSC_knowngene	2415	chr1	-	25629228	25631643	CTGAGACTGATGATAACTTGCTATGTGTTCTTTTTTCTGCCCTTCCTCCTTTCATTTCAG	natural antisense	NM_016124	RHD	blood group Rh(D) polypeptide isoform 1	+	25598980	25656936	5.68021	7.21335
ASHGA5P016964	0.00012838	0.00393288	2.89223	down	noncoding	ENST00000436060	LINC00606	GENCODE	429	chr3	-	10803390	10805866	CTCTTTGCAGTCCCATTTTCCACTGCTTTGGTCAGGGAGTGAGTCCCCTGATGTCATCCG	intergenic							3.83155	5.36374
ASHGA5P016581	0.0155574	0.0529744	2.88878	down	noncoding	uc001fts.4	BC038194	UCSC_knowngene	1060	chr1	-	159315958	159438858	GGTAAAATAAGCTTCAAGATTCCTCTTTTCATCTCTCACTGAAGAAATATACCCCTTTTC	intronic antisense	NM_012351	OR10J1	olfactory receptor 10J1	+	159409511	159410600	3.62308	5.15354
ASHGA5P015773	0.0200946	0.0609714	2.88755	down	noncoding	ENST00000423385	RP11-423O2.5	GENCODE	1742	chr1	-	142803223	142816004	GCCAAACGAGGGTTCCACAGAAGTCTCCAATCTTCAAATCTTCAGTGTATGAAAGCACAG	intergenic							3.25773	4.78757
ASHGA5P028264	0.0257038	0.0702474	2.88551	down	noncoding	ENST00000542331	RP11-443D10.2	GENCODE	560	chr12	+	109541771	109545809	GCTTCCACTCTTTCTCTTAAAGGAACTACTAAATACAGTGTCTTGGGTATTTTTCTAAAG	intron sense-overlapping	NM_003362	UNG	uracil-DNA glycosylase isoform UNG1 precursor	+	109535922	109548798	3.22632	4.75515
ASHGA5P028264	0.0257038	0.0702474	2.88551	down	noncoding	ENST00000542331	RP11-443D10.2	GENCODE	560	chr12	+	109541771	109545809	GCTTCCACTCTTTCTCTTAAAGGAACTACTAAATACAGTGTCTTGGGTATTTTTCTAAAG	intron sense-overlapping	NM_080911	UNG	uracil-DNA glycosylase isoform UNG2	+	109535398	109548798	3.22632	4.75515
ASHGA5P046418	0.0193745	0.0597899	2.87825	down	noncoding	ENST00000420865	RP11-309M23.1	GENCODE	588	chrX	+	950955	955100	CCGTCAACAAAACGCTAATAAGTGCAGAAAGACTGTTTAGCAGGAAACATGTCCAAAAAA	intergenic							3.44106	4.96625
ASHGA5P032181	0.0306726	0.0774034	2.87567	down	noncoding	ENST00000582915	RP11-597M12.1	GENCODE	335	chr17	-	12893465	12893927	AAAGGAACAAACAAAACCTGCACCACCAGCATCACCACACGGACTGGAGATCACAATTTT	natural antisense	NM_014859	ARHGAP44	rho GTPase-activating protein 44	+	12692828	12894960	6.51574	8.03964
ASHGA5P034904	0.0468838	0.0986797	2.87512	down	noncoding	TCONS_00003580	XLOC_001356	LincRNAs identified by Cabili et al	381	chr2	+	13141014	13353671	AGATATTCTCTGAGACCGGGAACGTCACTGCTCTCCCCGGGAAGCTGCTTTAGGCACAGT	intergenic							6.08903	7.61266
ASHGA5P026681	0.00703794	0.0330208	2.86662	down	noncoding	ENST00000530030	RP11-718B12.3	GENCODE	865	chr11	+	82530208	82533921	CTACCCATTGACTCCAGGCAGTTAAAGTAACAAAAACAGAAAATAAAAAGCACCCAATTC	intergenic							3.17572	4.69507
ASHGA5P026499	0.00236525	0.0179063	2.8624	down	noncoding	ENST00000433606	AP001092.4	GENCODE	469	chr11	+	64413870	64427153	TTGAGTCCTGGCTCCTCCCTCTGCCTTCACTAGTTTTGTAATGTTGAACAAGTCAATACA	intronic antisense	NM_015080	NRXN2	neurexin-2-beta isoform alpha-1 precursor	-	64373645	64490660	8.27057	9.7878
ASHGA5P026499	0.00236525	0.0179063	2.8624	down	noncoding	ENST00000433606	AP001092.4	GENCODE	469	chr11	+	64413870	64427153	TTGAGTCCTGGCTCCTCCCTCTGCCTTCACTAGTTTTGTAATGTTGAACAAGTCAATACA	intronic antisense	NM_138732	NRXN2	neurexin-2-beta isoform alpha-2 precursor	-	64373645	64490660	8.27057	9.7878
ASHGA5P046080	0.0176276	0.0569132	2.86234	down	noncoding	uc003jaj.2	LOC100233156	UCSC_knowngene	1315	chrUn_gl000218	-	62408	97454	TGGTGAATTTCAGCCAAAGTGGCCAAAGAAATCCTGTTCCTGTGATAATGACGCCATCAG	intergenic							3.13771	4.65491
ASHGA5P037690	0.000359187	0.0067593	2.86003	down	noncoding	ENST00000504337	RP1-5O6.6	GENCODE	1063	chr22	-	38616981	38618939	GTGGGCACACATTGTTCACTCAGCTGTCTCTTGTCTTCTCTATTTCTTTGGCTTCTCTCC	exon sense-overlapping	NM_001195071	TMEM184B	transmembrane protein 184B isoform a	-	38615297	38668670	3.0151	4.53113
ASHGA5P037690	0.000359187	0.0067593	2.86003	down	noncoding	ENST00000504337	RP1-5O6.6	GENCODE	1063	chr22	-	38616981	38618939	GTGGGCACACATTGTTCACTCAGCTGTCTCTTGTCTTCTCTATTTCTTTGGCTTCTCTCC	exon sense-overlapping	NM_001195072	TMEM184B	transmembrane protein 184B isoform b	-	38615297	38669040	3.0151	4.53113
ASHGA5P037690	0.000359187	0.0067593	2.86003	down	noncoding	ENST00000504337	RP1-5O6.6	GENCODE	1063	chr22	-	38616981	38618939	GTGGGCACACATTGTTCACTCAGCTGTCTCTTGTCTTCTCTATTTCTTTGGCTTCTCTCC	exon sense-overlapping	NM_012264	TMEM184B	transmembrane protein 184B isoform a	-	38615297	38669040	3.0151	4.53113
ASHGA5P033166	0.000681465	0.00978783	2.85823	down	noncoding	ENST00000572193	RP5-867C24.5	GENCODE	673	chr17	+	45247191	45248415	CTTCATTACCAAAGTGCATCTAACTATGGAGACACAAATTTTTTCTCTCTCTCTCTTTCC	natural antisense	NM_001114091	CDC27	cell division cycle protein 27 homolog isoform 1	-	45195310	45266665	3.59859	5.11372
ASHGA5P033166	0.000681465	0.00978783	2.85823	down	noncoding	ENST00000572193	RP5-867C24.5	GENCODE	673	chr17	+	45247191	45248415	CTTCATTACCAAAGTGCATCTAACTATGGAGACACAAATTTTTTCTCTCTCTCTCTTTCC	natural antisense	NM_001256	CDC27	cell division cycle protein 27 homolog isoform 2	-	45195310	45266665	3.59859	5.11372
ASHGA5P028715	0.00214413	0.0171045	2.85477	down	noncoding	ENST00000453309	RP11-101P17.11	GENCODE	677	chr13	+	21861544	21868997	CTCTCACTTGCTGTCACTCTGAATTATTTGCTTACAGAATAAACATAACTTTGTGTCCAA	intergenic							2.92885	4.44223
ASHGA5P051385	0.0218427	0.0635567	2.85004	down	noncoding	ENST00000430316	RP4-655J12.4	GENCODE	461	chr1	-	116995656	117020849	CCCCTCCTAGGTTCTCACATCGCTTTCCTGTTTCCCTCTCCTGCAATATGGATTTGACAT	intergenic							6.82653	8.33751
ASHGA5P049524	5.16088e-05	0.00236758	2.84737	down	noncoding	NR_027159	C17orf76-AS1	RefSeq	1215	chr17	+	16342300	16345340	TCTTTAAGCTGGAAATTGTAAATTCCTCCTGAAATGTTTTTTCATGCAGTTACCATGAAC	natural antisense	NM_001113567	FAM211A	leucine-rich repeat-containing protein FAM211A isoform 1	-	16345318	16395505	7.51633	9.02597
ASHGA5P049524	5.16088e-05	0.00236758	2.84737	down	noncoding	NR_027159	C17orf76-AS1	RefSeq	1215	chr17	+	16342300	16345340	TCTTTAAGCTGGAAATTGTAAATTCCTCCTGAAATGTTTTTTCATGCAGTTACCATGAAC	natural antisense	NM_207387	FAM211A	leucine-rich repeat-containing protein FAM211A isoform 2	-	16345318	16395505	7.51633	9.02597
ASHGA5P041524	0.00852047	0.0367391	2.84334	down	noncoding	ENST00000504527	CTB-174D11.1	GENCODE	557	chr5	+	168440252	168445707	TAATTTTTTTCTCTGTCTTATCTCCGAGTTGGGTGGTGAACTGTGGAAACACTGTATTGA	intronic antisense	NM_003062	SLIT3	slit homolog 3 protein precursor	-	168093070	168728133	3.32074	4.82833
ASHGA5P035341	0.00560625	0.0292029	2.84294	down	noncoding	ENST00000546678	RP11-570L15.2	GENCODE	506	chr2	-	144053154	144329674	TTGTTCTCAGCTTCCTTCTCCCCTGACATTCTCAGTACCTCTCTATTCATGAAATCCTAC	intronic antisense	NM_018460	ARHGAP15	rho GTPase-activating protein 15	+	143886898	144525921	6.37403	7.88142
ASHGA5P026378	0.00445188	0.0255291	2.83916	down	noncoding	BX114362		LincRNAs identified by Khalil et al	693	chr5	+	171281602	171282294	ATTATTTCCGTGGGTTTTAAGGGTGGGCACATGATTCTACCTGAGCCAAGGACACTTAGT	intergenic							3.02012	4.52559
ASHGA5P047083	0.0160738	0.0540291	2.83001	down	noncoding	ENST00000445600	RP11-547D24.3	GENCODE	320	chr1	-	1980641	1981090	CTGTCTACCTCTCCTGCCACCACCCACTCACACGTTTTAAATACAAGCCGTCGGTTCTCA	bidirectional	NM_002744	PRKCZ	protein kinase C zeta type isoform 1	+	1981908	2116834	7.70383	9.20464
ASHGA5P046239	0.00259001	0.0188324	2.8224	down	noncoding	NR_028379	FTX	RefSeq	2356	chrX	-	73247970	73513409	GCTTCCTTCTGTAAAATTTGGACTGTTTGTTCTTCCCATTATATTAATAGTTGCTTCAGG	intergenic							3.7223	5.21922
ASHGA5P036737	0.00316859	0.021111	2.82183	down	noncoding	ENST00000443171	RP4-553F4.6	GENCODE	642	chr20	-	32375180	32398903	TAATACTCTTCCTCATTGGCCTTCCTGTCTCCATCTTTATTCCTTCCAGCTCATTCTCTA	intronic antisense	NM_032819	ZNF341	zinc finger protein 341	+	32319807	32380075	5.9108	7.40743
ASHGA5P055594	0.00500025	0.0273721	2.82033	down	noncoding	ENST00000550185	RP11-626I20.3	GENCODE	3059	chr12	+	103941571	103953593	GACTGGGATTTTTTTAAAGCTCTCTTCCCTTCCCCACCTTGAGTGTACAATGGAGAGTGC	intergenic							7.80169	9.29755
ASHGA5P053072	0.000401428	0.00718751	2.81528	down	noncoding	uc003tmk.4	SNHG15	UCSC_knowngene	3111	chr7	-	45022626	45026236	AGAAATTTCAGACAATGACTTCCTCCCTCCTGGATCTAGTGTCCTGGGCCTTGTATAGAT	intergenic							7.2111	8.70438
ASHGA5P023476	0.0174271	0.0565318	2.81505	down	noncoding	ENST00000581690	RP11-805F19.1	GENCODE	525	chr18	-	15159722	15164466	GAAAGAGTATCTGCCATTGAAGATTGGATATCTTGTTGTGATAAAGGCATGACATTATAC	intergenic							3.2919	4.78506
ASHGA5P048943	1.02288e-06	0.00024821	2.81068	down	noncoding	uc002cdq.3	WASH3P	UCSC_knowngene	1295	chr15	+	102513422	102516808	GCTCCATGGGGGGACGGCTCCACCCAGCCTGCGCCACTGTGTTCTTCTCTTAAGAGGCTT	intergenic							9.51883	11.0097
ASHGA5P049027	0.0122609	0.0458654	2.80884	down	noncoding	NR_033861	LINC00514	RefSeq	3221	chr16	+	3039054	3044510	TCTCTCTCCCACGAGCCCTTCCACTAAGAATGGCTATGGAGCAGGTAGAGATGGGAGTGG	intergenic							6.0535	7.54348
ASHGA5P044170	0.00565218	0.0292712	2.80553	down	noncoding	TCONS_00014735	XLOC_006820	LincRNAs identified by Cabili et al	585	chr8	+	64366194	64369530	CTGCCTGCATGTGGATTCATTTTAGCAGTTTATCAATTTGGACAGGGAATTTTGAATAAA	intergenic							3.59072	5.079
ASHGA5P038036	0.0129427	0.0473403	2.8051	down	noncoding	TCONS_00016476	XLOC_007848	LincRNAs identified by Cabili et al	339	chr9	-	126101092	126102106	CTTCAGACTCTGCCTCTCTCAATCCTTATACAAGGCCAGAGAGCGCTTGAGGCTTCCAGG	intergenic							4.24108	5.72913
ASHGA5P044778	0.00605869	0.0303626	2.80176	down	noncoding	TCONS_00001086	XLOC_000329	LincRNAs identified by Cabili et al	626	chr1	+	106993297	106995113	TCTCCTCCCCAAATTTATTTTCTTACAGCTTTGGAGATGGGAATTTTCTGGGGTCCTTTT	intergenic							5.91118	7.39751
ASHGA5P043156	0.00136947	0.0136076	2.80121	down	noncoding	uc022agj.1	PMS2P3	UCSC_knowngene	1262	chr7	-	75140252	75157453	AGGGGCCGGGAGGGAGTCGGCTGAGGTGGCGGCGGAGGCGAAGTGGCGGCGGAGGCGAAG	intergenic							4.81363	6.29968
ASHGA5P033212	0.00279146	0.0195742	2.79532	down	noncoding	ENST00000511627	RP1-117B12.4	GENCODE	715	chr17	+	48473798	48475249	CCTGTCCTCTACTTAACCCCCGAATAACCATCATGGGGAAAACTCTTCTTCCTGAATTTC	natural antisense	NM_018509	LRRC59	leucine-rich repeat-containing protein 59	-	48458593	48474914	6.58171	8.06472
ASHGA5P036141	0.0105075	0.0418559	2.79471	down	noncoding	ENST00000424716	AC068137.1	pseudogene	533	chr2	+	130893550	130895332	TCTTCAACCATTCCCTGTACCGCATATTCATGCCAACCATGATTGCCATCCACAGCCCAC								3.24219	4.72489
ASHGA5P037662	0.00186053	0.0158659	2.79397	down	noncoding	ENST00000441289	RP11-247I13.7	GENCODE	597	chr22	-	31832962	31835893	GTATCCTCTTCCACTTATCTTACTTCCCCTTCATGTTGAACCAACGTTAATAGGTGCAAG	exon sense-overlapping	NM_001164501	EIF4ENIF1	eukaryotic translation initiation factor 4E transporter isoform a	-	31835344	31885547	4.90755	6.38987
ASHGA5P037662	0.00186053	0.0158659	2.79397	down	noncoding	ENST00000441289	RP11-247I13.7	GENCODE	597	chr22	-	31832962	31835893	GTATCCTCTTCCACTTATCTTACTTCCCCTTCATGTTGAACCAACGTTAATAGGTGCAAG	exon sense-overlapping	NM_001164502	EIF4ENIF1	eukaryotic translation initiation factor 4E transporter isoform b	-	31835344	31885874	4.90755	6.38987
ASHGA5P037662	0.00186053	0.0158659	2.79397	down	noncoding	ENST00000441289	RP11-247I13.7	GENCODE	597	chr22	-	31832962	31835893	GTATCCTCTTCCACTTATCTTACTTCCCCTTCATGTTGAACCAACGTTAATAGGTGCAAG	exon sense-overlapping	NM_019843	EIF4ENIF1	eukaryotic translation initiation factor 4E transporter isoform a	-	31835344	31885874	4.90755	6.38987
ASHGA5P057575	4.28373e-05	0.00212367	2.79338	down	noncoding	TCONS_00019314	XLOC_009146	LincRNAs identified by Cabili et al	1169	chr11	+	61270427	61274382	TTCAACAGATCAGGTCTCAGTTTCCTGCCTTCCTGGGAAGTGGGGAAAGGCTGAGAGGCC	intergenic							3.30094	4.78295
ASHGA5P037291	0.0045728	0.0259872	2.78812	down	noncoding	ENST00000436713	RP1-92O14.6	GENCODE	731	chr1	+	43850783	43854826	CTGTTCATCCACTCCTAGAACAGATAGCTAAACCTGTGTGACTCCCATTTAACGTCACAG	natural antisense	NM_052877	MED8	mediator of RNA polymerase II transcription subunit 8 isoform 3	-	43849587	43855483	4.32858	5.80788
ASHGA5P037291	0.0045728	0.0259872	2.78812	down	noncoding	ENST00000436713	RP1-92O14.6	GENCODE	731	chr1	+	43850783	43854826	CTGTTCATCCACTCCTAGAACAGATAGCTAAACCTGTGTGACTCCCATTTAACGTCACAG	natural antisense	NM_201542	MED8	mediator of RNA polymerase II transcription subunit 8 isoform 1	-	43850396	43855483	4.32858	5.80788
ASHGA5P022775	0.0284128	0.0742615	2.78632	down	noncoding	ENST00000562573	RP11-1007O24.3	GENCODE	723	chr15	-	72700118	72766550	TCAAAATGAGAGATTCCATCTCAGACCTTGGCCCTTCATCTTTAGCAGGTGATACTGTAG	natural antisense	NM_001080462	TMEM202	transmembrane protein 202	+	72690667	72700708	8.44689	9.92525
ASHGA5P056379	0.00135963	0.0136076	2.78129	down	noncoding	TCONS_00003820	XLOC_001628	LincRNAs identified by Cabili et al	318	chr2	+	113436286	113438656	TCCTCCAAATCTCCTCCTGAAAAGCATGCAGCCGGCAGAAGATCTGGATACCACAGAGAC	intergenic							3.93597	5.41173
ASHGA5P041416	0.00154917	0.0144001	2.77705	down	noncoding	NR_026705	VTRNA1-3	RefSeq	88	chr5	+	140105743	140105831	TTTAGCTCAGCGGTTACTTCGCGTGTCATCAAACCACCTCTCTGGGTTGTTCGAGACCCG	intergenic							2.94945	4.42301
ASHGA5P054448	0.00122475	0.0129034	2.77705	down	noncoding	TCONS_00010726	XLOC_004448	LincRNAs identified by Cabili et al	312	chr5	+	82683935	82687184	TAGATGGAGTCTTGCTCTGTCACCAGGCAATCATTAATGATATTGGTTGTAATTTTAGAG	intergenic							3.2325	4.70606
ASHGA5P030196	0.044514	0.0957906	2.77661	down	noncoding	uc021ssx.1	LOC440297	UCSC_knowngene	6806	chr15	-	82970478	82986427	TCACTCCCTATGGTGTCTGTCTGTCCTGAGAGGTGGATGAATTGAAGCTCTAGTTTCTCT	intergenic							4.97291	6.44624
ASHGA5P027315	0.0375065	0.0862248	2.7729	down	noncoding	ENST00000551419	RP11-793H13.9	GENCODE	545	chr12	-	53863569	53864527	GTAAAAAATATGACCCTGGACAGCACAGATCTGATGTTCATGAACCACTACACTATGGTG	intronic antisense	NM_001098620	PCBP2	poly(rC)-binding protein 2 isoform c	+	53845885	53874946	3.38184	4.85323
ASHGA5P027315	0.0375065	0.0862248	2.7729	down	noncoding	ENST00000551419	RP11-793H13.9	GENCODE	545	chr12	-	53863569	53864527	GTAAAAAATATGACCCTGGACAGCACAGATCTGATGTTCATGAACCACTACACTATGGTG	intronic antisense	NM_001128911	PCBP2	poly(rC)-binding protein 2 isoform d	+	53845885	53874946	3.38184	4.85323
ASHGA5P027315	0.0375065	0.0862248	2.7729	down	noncoding	ENST00000551419	RP11-793H13.9	GENCODE	545	chr12	-	53863569	53864527	GTAAAAAATATGACCCTGGACAGCACAGATCTGATGTTCATGAACCACTACACTATGGTG	intronic antisense	NM_001128912	PCBP2	poly(rC)-binding protein 2 isoform e	+	53845885	53874946	3.38184	4.85323
ASHGA5P027315	0.0375065	0.0862248	2.7729	down	noncoding	ENST00000551419	RP11-793H13.9	GENCODE	545	chr12	-	53863569	53864527	GTAAAAAATATGACCCTGGACAGCACAGATCTGATGTTCATGAACCACTACACTATGGTG	intronic antisense	NM_001128913	PCBP2	poly(rC)-binding protein 2 isoform f	+	53845885	53874946	3.38184	4.85323
ASHGA5P027315	0.0375065	0.0862248	2.7729	down	noncoding	ENST00000551419	RP11-793H13.9	GENCODE	545	chr12	-	53863569	53864527	GTAAAAAATATGACCCTGGACAGCACAGATCTGATGTTCATGAACCACTACACTATGGTG	intronic antisense	NM_001128914	PCBP2	poly(rC)-binding protein 2 isoform g	+	53845885	53874946	3.38184	4.85323
ASHGA5P027315	0.0375065	0.0862248	2.7729	down	noncoding	ENST00000551419	RP11-793H13.9	GENCODE	545	chr12	-	53863569	53864527	GTAAAAAATATGACCCTGGACAGCACAGATCTGATGTTCATGAACCACTACACTATGGTG	intronic antisense	NM_005016	PCBP2	poly(rC)-binding protein 2 isoform a	+	53845885	53874946	3.38184	4.85323
ASHGA5P027315	0.0375065	0.0862248	2.7729	down	noncoding	ENST00000551419	RP11-793H13.9	GENCODE	545	chr12	-	53863569	53864527	GTAAAAAATATGACCCTGGACAGCACAGATCTGATGTTCATGAACCACTACACTATGGTG	intronic antisense	NM_031989	PCBP2	poly(rC)-binding protein 2 isoform b	+	53845885	53874946	3.38184	4.85323
ASHGA5P043139	0.0292519	0.0754706	2.77099	down	noncoding	uc011kfp.2	PMS2L2	UCSC_knowngene	600	chr7	-	74702862	74988229	ACAAATGGTTCCTCTCCTCCTTCCTGATGTCTGCCATTAGCATTGGAATAAAGTTCCTGC	intron sense-overlapping	NM_001145064	GATSL2	GATS-like protein 2	-	74807604	74867341	9.23587	10.7063
ASHGA5P042015	0.00650199	0.0314394	2.76442	down	noncoding	ENST00000431104	RP11-510H23.3	GENCODE	484	chr6	-	125329900	125330635	GGAAAATCTCTCCACCAGCTACACACACATAAAAGTATTAAACACAACATTTTTACTACC	natural antisense	NM_152553	RNF217	probable E3 ubiquitin-protein ligase RNF217	+	125304513	125404661	4.6403	6.10728
ASHGA5P040107	0.0181343	0.0578423	2.75872	down	noncoding	ENST00000412092	AL583842.3	GENCODE	594	chr1	+	142618794	142621532	GTGTTGTACAGTGGAAACGGTCATCTTCCGCTAAAGCACAGTGTGTTTTGCAGTGGAAAT	intergenic							3.34962	4.81362
ASHGA5P015966	0.0275723	0.0730169	2.75607	down	noncoding	NR_046326	KDM5B-AS1	RefSeq	650	chr1	+	202780073	202781041	GTTCCTTCCGTCTCCAGTGCACCGGCTTTCCCTCGTCCTCTGCGCAGTCCATCTCAGCTC	intergenic							6.29424	7.75686
ASHGA5P000373	0.0194243	0.0598234	2.74968	down	noncoding	chr2:90959050-90986900-	chr2:90959050-90986900	LincRNAs identified by Khalil et al	27850	chr2	-	91595323	91623173	TAACATTGGGAGAAATAGCCAGCTGAATCTGTAACTCAACAGAAACAAGTGATCCATATA	intergenic							3.5843	5.04356
ASHGA5P057615	0.0175689	0.0567633	2.74867	down	noncoding	TCONS_00019683	XLOC_009483	LincRNAs identified by Cabili et al	3149	chr11	-	68996242	69002390	TCTCAGGCTTTGCTGGCTTGTGTTTGACACCATGCCTGACACATTGGGGGTGCTCAGTAG	intergenic							5.22516	6.6839
ASHGA5P036311	0.00235617	0.017867	2.74731	down	noncoding	ENST00000447478	RP4-534N18.2	GENCODE	517	chr1	+	32398620	32399576	CTCTACCATCACCCTATTCGATAAACATAACTAAGTCCACCATGTTAAAACTATGGATCC	intronic antisense	NM_080391	PTP4A2	protein tyrosine phosphatase type IVA 2 isoform 1	-	32372021	32403988	4.72191	6.17992
ASHGA5P045621	0.0125975	0.0465951	2.74585	down	noncoding	ENST00000428006	RP11-536O18.1	GENCODE	477	chr9	+	13446524	13487510	ATCTCTGTCTCCAACCCACAAACCACATGCATCATAAATAAATTAAAATACCAAAACTTT	intergenic							5.25597	6.71322
ASHGA5P031782	0.0421121	0.0926105	2.74555	down	noncoding	ENST00000567781	RP11-357N13.7	GENCODE	14892	chr16	+	54033348	54048240	CTGTGGTGCTTTGGTTGAAGCTCTCTGTCTGTTTTAGAGAAAAGACTTACAATGACCTCC	intron sense-overlapping	NM_001080432	FTO	alpha-ketoglutarate-dependent dioxygenase FTO	+	53737874	54148379	3.55661	5.01371
ASHGA5P037383	0.0109937	0.0430093	2.74555	down	noncoding	ENST00000481582	ABCC13	GENCODE	4080	chr21	+	15646200	15672006	CCCTACTTACGTTCTGGTTGTCATGTTTCCCTGTATTTGATAAAACACATAATTTTGAGA	intergenic							3.58013	5.03722
ASHGA5P056956	0.00758925	0.0341701	2.74055	down	noncoding	TCONS_00011098	XLOC_005099	LincRNAs identified by Cabili et al	261	chr5	-	177388523	177388871	CCTCTGCCACCTCCCTCCTCAATGTCAGCCATGGCCATCGTTCCCTCTGCCACGCTCCCT	intergenic							11.0105	12.4649
ASHGA5P052815	0.00565108	0.0292712	2.73906	down	noncoding	uc003psf.1	AF520419	UCSC_knowngene	1957	chr6	+	108444839	108479222	CCTTACACCAGCACATGGTCTCTCTTTCCTGTTCATTCACTTTGGAAGACAGTCCTTGAA	intronic antisense	ENST00000440575	OSTM1	osteopetrosis associated transmembrane protein 1 [Source:HGNC Symbol;Acc:21652]	-	108366034	108487044	3.92684	5.38052
ASHGA5P043787	0.04222	0.092693	2.73775	down	noncoding	ENST00000415536	AC003092.1	GENCODE	639	chr7	+	93652144	93694035	GATAAGGACTTTCAGGTCAACAGCTGTAACTGCTAAATGAAGTTAATACTCTGGAAAAAA	intergenic							3.34223	4.79522
ASHGA5P036066	0.00757855	0.0341387	2.72445	down	noncoding	ENST00000562665	RP11-1223D19.1	GENCODE	814	chr2	+	110992311	111023767	CAAAATGAGAAGAAAAAGTCCCTTTCCCTTCATGCCTCTACTTCCTGCTGTATTCTCAAA	intergenic							5.74504	7.19101
ASHGA5P039647	0.000131938	0.00401518	2.72282	down	noncoding	ENST00000507849	RP11-563M4.1	GENCODE	481	chr4	-	149948596	149983674	GCTGACCTGCATGACCTACAACATGCACCTAGCAATCATTTATGTATTTGATATATTTTT	intergenic							2.5866	4.0317
ASHGA5P017497	0.00609523	0.030463	2.72216	down	noncoding	ENST00000442370	RP11-107C16.2	GENCODE	536	chr10	+	124578331	124583027	GTGTGCGCAGGTCTGGCTGACTCTCTTGTACCTAAGGACAATGGTAAAGTCTTCCCTCTA	intergenic							2.92191	4.36666
ASHGA5P045787	0.0387701	0.0882043	2.72181	down	noncoding	ENST00000531661	RP11-522I20.3	GENCODE	1017	chr9	+	86323232	86328293	TCCCTTGCCTCTCTGTCTACTCTGCGTTCCCCGCTGGGAGGAGGGTCTGGTGATAAAATA	bidirectional	NM_013438	UBQLN1	ubiquilin-1 isoform 1	-	86274877	86323168	7.81551	9.26007
ASHGA5P045787	0.0387701	0.0882043	2.72181	down	noncoding	ENST00000531661	RP11-522I20.3	GENCODE	1017	chr9	+	86323232	86328293	TCCCTTGCCTCTCTGTCTACTCTGCGTTCCCCGCTGGGAGGAGGGTCTGGTGATAAAATA	bidirectional	NM_053067	UBQLN1	ubiquilin-1 isoform 2	-	86274877	86323168	7.81551	9.26007
ASHGA5P032904	0.0111626	0.0433757	2.7192	down	noncoding	ENST00000584135	KRT16P1	GENCODE	563	chr17	+	18343221	18344613	ATGCTCTTAGCCTTCCTGAGCACCTTCCCTTTTTTCAGCCAACTGCTCGCTCGCTCACCT	intergenic							5.83892	7.2821
ASHGA5P032956	0.0266799	0.0716731	2.70967	down	noncoding	ENST00000456235	AC087393.1	GENCODE	750	chr17	+	20978868	20993928	GCTCAGCAATTTTCTTGGAGACCTCAGTGCTCATGTTATTCTTTCCTCTATCTTATGTTT	intergenic							3.60908	5.0472
ASHGA5P047115	0.00559245	0.0292005	2.70699	down	noncoding	TCONS_00013653	XLOC_006309	LincRNAs identified by Cabili et al	1044	chr7	+	156696054	156714884	GAAAAACTCCTCTGCTGCTTCTTCCTCTGATTTCACATTCGGTAAACCTGCAAGTGCACA	intergenic							5.3496	6.78628
ASHGA5P036099	0.00166416	0.0150591	2.70677	down	noncoding	uc021vmx.1	DKFZp434K1323	UCSC_knowngene	507	chr2	+	114341204	114341711	GAGCGGCGGCGTTAGGACCCGGAGGCGCGGGCGGAGGTGGCGGGGCTAGGACCCAGCGGC	intergenic							4.01439	5.45096
ASHGA5P058274	0.0190507	0.0592466	2.70598	down	noncoding	TCONS_00029073	XLOC_013995	LincRNAs identified by Cabili et al	4150	chr21	-	10196441	10200844	ATGGTAGGGAGGAATTAGGTGTGTTCTTTGTTAAGCAGGTAGTCTTATTTGTGGGATAGT	intergenic							3.76853	5.20468
ASHGA5P041900	0.0127875	0.0470902	2.69802	down	noncoding	ENST00000413945	LINC00472	GENCODE	662	chr6	-	72054046	72129806	CCACCCCATCCCCTTATTGAACAATTACGATGCCTATAAATATTGTATTGAGAAAGAAAA	intergenic							9.21729	10.6492
ASHGA5P020983	0.00541527	0.0287327	2.69651	down	noncoding	ENST00000523050	CTC-353G13.1	GENCODE	663	chr5	-	167364721	167380474	GAGATCATTTTCAAACTCTTCCCTCCTCACCCAAAATACATGAAAAGCCCTTCTGTAAAG	intronic antisense	NM_001122679	ODZ2	teneurin-2	+	166711842	167691162	6.7015	8.13259
ASHGA5P033232	0.017803	0.0570995	2.69281	down	noncoding	ENST00000505978	RP11-1018N14.3	GENCODE	650	chr17	+	49410039	49411451	GGGTGCTGTGCTAAATGTGCTTCAAACAACATTTCATTGAACTCCCACGACTCAATGAAT	intergenic							4.37638	5.80549
ASHGA5P037794	0.023202	0.0658429	2.69046	down	noncoding	uc002zof.3	DQ786190	UCSC_knowngene	2139	chr22	+	18847155	18849294	CTCAAGAGTTTCATTTTATGGTCTTTCTCTTGTTCTGTAAAATGTGGGCATGGATAGATA	intergenic							3.13817	4.56602
ASHGA5P022992	0.0493488	0.101972	2.68088	down	noncoding	ENST00000567230	RP11-299H22.5	GENCODE	589	chr15	-	62555442	62558483	AGTGGCATTTGAGGCTGGCTTGAAGATTTAAGGTGAAACCAAGTGAGTGTCTCCTATTGG	intergenic							4.365	5.78771
ASHGA5P028616	0.0153945	0.0526531	2.68019	down	noncoding	ENST00000423249	BX004987.4	GENCODE	1789	chr1	-	143354962	143465438	GTGCACACTTGTGTGTATGCTTTAGATCCTGTTTTTTGTTGTTGTTGTTGTTTTGGTTTG	intergenic							3.59789	5.02022
ASHGA5P030824	0.000357231	0.00675005	2.67891	down	noncoding	uc010bpl.1	WASH3P	UCSC_knowngene	1075	chr15	+	102501015	102513250	ACTAAGCAGATCACAAGGGAGCTGCCCACAGAGGTAAAGACAAGGTCAGGTAGGCTGAGA	intergenic							3.05432	4.47597
ASHGA5P038556	0.0039951	0.0241652	2.67685	down	noncoding	TCONS_00023477	XLOC_011325	LincRNAs identified by Cabili et al	324	chr15	+	79512303	79513126	ATGCAGGAGGAGAGAGAGGAGGACAGGTTTTCTTCACATCCTGATTGCAGTTGATTCTTT	intergenic							2.93004	4.35058
ASHGA5P040172	0.00701999	0.0330131	2.67684	down	noncoding	ENST00000415543	BX004987.5	GENCODE	661	chr1	+	143392449	143394444	AGAAGAATATAAGGAAGCCTTTGCAGCAGCATTGAAAGCTAACAGTTCCATGTCAAAAAA	intergenic							3.6699	5.09043
ASHGA5P015422	0.017644	0.0569263	2.67585	down	noncoding	ENST00000420143	ANKRD20A19P	GENCODE	641	chr13	-	24515107	24520363	CGGATTCTAGGAGCCGGTGGTTGGGGGTCTGAGAAGTCACCACCACCAAGAAGTTCTTCG	intergenic							3.3978	4.81779
ASHGA5P053559	0.0149582	0.0518923	2.66806	down	noncoding	uc003ysd.1	DQ515899	UCSC_knowngene	790	chr8	-	128302061	128433619	TTTCCCTCCTCCAGCTTTGTGCTGATGAACATGGTCACCTTGAAAGGTGTGTTGAATATG	intronic antisense	NM_001159542	POU5F1B	putative POU domain, class 5, transcription factor 1B	+	128427856	128429441	5.38729	6.80308
ASHGA5P058611	0.000267006	0.00580675	2.66687	down	noncoding	uc011ahn.1	PI4KAP1	UCSC_knowngene	1632	chr22	-	20386525	20402440	ATATCATCCACATCGTCACAGGCAGCTCTTTGGGGTTTTGCAGACTTTGGCTTCATGTTT	intergenic							2.86388	4.27902
ASHGA5P050609	0.00520527	0.0280361	2.66545	down	noncoding	NR_027467	LIMS3	RefSeq	2558	chr2	+	110656008	110683202	TTCTTCCCCCCCTGCAACTTTTGGGCGTGTATTTGTAGTCATCAGAAATTTGGGCCAAGG	exon sense-overlapping	NM_001205288	LIMS3L	LIM and senescent cell antigen-like-containing domain protein 3-like	+	110656008	110664033	10.22	11.6344
ASHGA5P050609	0.00520527	0.0280361	2.66545	down	noncoding	NR_027467	LIMS3	RefSeq	2558	chr2	+	110656008	110683202	TTCTTCCCCCCCTGCAACTTTTGGGCGTGTATTTGTAGTCATCAGAAATTTGGGCCAAGG	exon sense-overlapping	NM_033514	LIMS3	LIM and senescent cell antigen-like-containing domain protein 3	+	110656008	110664033	10.22	11.6344
ASHGA5P056511	0.000493049	0.00813311	2.66402	down	noncoding	TCONS_00005128	XLOC_002041	LincRNAs identified by Cabili et al	752	chr2	-	30566372	30571394	GCTGTCTCGGCTTCGTGAAAGTTTCTTGTAGTTTTCTTTGATCTGTATGACAGTTCATTG	intergenic							2.80362	4.21723
ASHGA5P033224	0.0193162	0.0597155	2.66347	down	noncoding	NR_038458	LOC400604	RefSeq	1420	chr17	+	48944039	48945732	TTTATTTGTTTGTTTTTGGTTTTCTGTAATGACAAGTCCATCTGTAATAAAAGTGAGTTA	natural antisense	NM_001243877	TOB1	protein Tob1 isoform 1	-	48939586	48945339	4.49408	5.90739
ASHGA5P000401	0.0276776	0.0731065	2.66251	down	noncoding	chr3:45182150-45196400-	chr3:45182150-45196400	LincRNAs identified by Khalil et al	14250	chr3	-	45207146	45221396	CCAAGGCCAGCCAGTTATCTTGGGGAGAGAAACTAGGTCATGTTTTCTTCCAAACATCTT	intergenic							3.49989	4.91268
ASHGA5P031612	0.00235558	0.017867	2.66109	down	noncoding	ENST00000567395	RP11-20G6.2	GENCODE	932	chr16	+	23031657	23034932	ATAGACGTTCCTGTTCCATTTGTCCCGCAAACGTTTAAACATCACACATACTTGGTTAAG	intergenic							3.17025	4.58227
ASHGA5P039691	0.000204348	0.00500889	2.6602	down	noncoding	uc003isx.1	BC137484	UCSC_knowngene	3513	chr4	-	173908347	173916913	TATTTCCTGCATCATCAGTCAGAAAATGGCATGCAGCTGTATTTTCACTGAACCACACTG	intronic antisense	NM_001034845	GALNTL6	polypeptide N-acetylgalactosaminyltransferase-like 6	+	172734574	173961558	3.18382	4.59536
ASHGA5P048035	0.010471	0.0418018	2.65817	down	noncoding	ENST00000511537	HNRNPKP3	GENCODE	1882	chr11	-	43283053	43290919	ACCCCTCCATCATACCTTTTAAAACTAACAACTGTGAATCGTTTATTGTGTTAACCCTAT	intergenic							6.21976	7.6302
ASHGA5P055241	0.0104073	0.0416518	2.655	down	noncoding	ENST00000537295	RP11-598F7.6	GENCODE	1063	chr12	-	276021	291562	GAAAAAAATAAACAGAACCTCTTCTCTCACTCTCCAGTGGAAAGTATAGAATCAAACGTA	intronic antisense	NM_001170738	IQSEC3	IQ motif and SEC7 domain-containing protein 3 isoform 1	+	176048	287625	3.9905	5.39921
ASHGA5P055241	0.0104073	0.0416518	2.655	down	noncoding	ENST00000537295	RP11-598F7.6	GENCODE	1063	chr12	-	276021	291562	GAAAAAAATAAACAGAACCTCTTCTCTCACTCTCCAGTGGAAAGTATAGAATCAAACGTA	intronic antisense	NM_015232	IQSEC3	IQ motif and SEC7 domain-containing protein 3 isoform 2	+	186541	280494	3.9905	5.39921
ASHGA5P030354	0.00565224	0.0292712	2.65157	down	noncoding	ENST00000568541	RP11-580I1.1	GENCODE	556	chr15	+	24451930	24471001	GCGAAAGTTAATATTATCCAGCCAGCCCAGAGTCCTTTCAACCATCCTGTATGACAACTA	intergenic							4.7048	6.11165
ASHGA5P031153	0.0116158	0.0442697	2.65152	down	noncoding	ENST00000563124	RP11-305A4.3	GENCODE	2085	chr16	-	49954640	49958065	ACAAACTCTCAACTCTGTCAGAAAATGGGCTGTGTCTGTGCCTCTCTCTCTTTCCTAGAA	intergenic							7.10435	8.51117
ASHGA5P028550	0.0192995	0.0597155	2.65145	down	noncoding	ENST00000437515	AL358175.1	GENCODE	2504	chr1	-	121102016	121139765	CAGGGTCCCTAACGTACTGGACAGAGCTAGGAAAGCAAACCCATTTGCTTCTTCCTGCAG	intergenic							3.18155	4.58833
ASHGA5P042910	0.0207164	0.0618808	2.65072	down	noncoding	ENST00000434321	AC005019.3	GENCODE	359	chr7	-	13893979	13898650	CCCTTCACCCCTTTTCTTGTTAACATTGCAGTCAAACATTGATTATCATGCACTTTAATA	intergenic							6.43592	7.8423
ASHGA5P041600	0.00298617	0.0203325	2.64861	down	noncoding	TCONS_00014806	XLOC_006882	LincRNAs identified by Cabili et al	221	chr8	+	101464411	101468508	TTTGGGGGATTTCCAGTGACAGTCCTACTCTCACTCCATCACATCGCTTCTAAAATCTGA	intergenic							4.81602	6.22126
ASHGA5P052283	0.0150978	0.0520827	2.64555	down	noncoding	uc021yag.1	GUSBP9	UCSC_knowngene	660	chr5	-	69812078	69851200	AACGCTTGTAGGGTTTCACCAGGTAAGCGGTGTTGAACTTTCTGCTTGTGTATTCTCTCT	intergenic							2.8265	4.23007
ASHGA5P049087	0.0021071	0.0169527	2.64422	down	noncoding	TCONS_00023847	XLOC_011157	LincRNAs identified by Cabili et al	490	chr15	+	20505642	20531084	AAGAAGAAAAAAGAGGTATTTGGAAATTGTGCAAATTAAAGCAGCCCCTGATGCCAAAGT	intergenic							3.86175	5.2646
ASHGA5P043298	0.0166259	0.0551862	2.64411	down	noncoding	ENST00000456270	AC000111.6	GENCODE	376	chr7	-	117244844	117287469	CATACTGGAATGGAATTAAAGACCGAACTACAGAAGCTAAAGAGAGCTGATCAAACTAAA	intronic antisense	NM_000492	CFTR	cystic fibrosis transmembrane conductance regulator	+	117120016	117308718	3.11775	4.52053
ASHGA5P057408	0.00010449	0.00353275	2.64162	down	noncoding	TCONS_00016895	XLOC_007895	LincRNAs identified by Cabili et al	3179	chr9	-	139144132	139148691	GCCTCCCCAGCAGCTCCTGTGGTCCCTGAGGAGGCGGCGCCCCCAATCCTGCACCAGGGC	intergenic							6.78557	8.18699
ASHGA5P043610	0.0231873	0.0658429	2.64135	down	noncoding	ENST00000434504	AC083863.7	GENCODE	538	chr7	+	33055670	33056504	ATGTCAGTTCTAACTCACTTCTTTTTCCAACTATGAATGTTAAGGCTTCAAAGTTGCTGC	intronic antisense	NM_001002009	NT5C3	cytosolic 5'-nucleotidase 3 isoform 2	-	33053724	33102409	3.01327	4.41455
ASHGA5P043610	0.0231873	0.0658429	2.64135	down	noncoding	ENST00000434504	AC083863.7	GENCODE	538	chr7	+	33055670	33056504	ATGTCAGTTCTAACTCACTTCTTTTTCCAACTATGAATGTTAAGGCTTCAAAGTTGCTGC	intronic antisense	NM_001002010	NT5C3	cytosolic 5'-nucleotidase 3 isoform 1	-	33053724	33102409	3.01327	4.41455
ASHGA5P043610	0.0231873	0.0658429	2.64135	down	noncoding	ENST00000434504	AC083863.7	GENCODE	538	chr7	+	33055670	33056504	ATGTCAGTTCTAACTCACTTCTTTTTCCAACTATGAATGTTAAGGCTTCAAAGTTGCTGC	intronic antisense	NM_001166118	NT5C3	cytosolic 5'-nucleotidase 3 isoform 3	-	33053724	33080777	3.01327	4.41455
ASHGA5P043610	0.0231873	0.0658429	2.64135	down	noncoding	ENST00000434504	AC083863.7	GENCODE	538	chr7	+	33055670	33056504	ATGTCAGTTCTAACTCACTTCTTTTTCCAACTATGAATGTTAAGGCTTCAAAGTTGCTGC	intronic antisense	NM_016489	NT5C3	cytosolic 5'-nucleotidase 3 isoform 2	-	33053724	33080777	3.01327	4.41455
ASHGA5P040698	0.0168787	0.0554464	2.64094	down	noncoding	ENST00000555344	CTC-349C3.2	GENCODE	489	chr5	-	134582735	134583505	TAAATCAGCATGAGTCACTCCCTTGCCTTCCTCACAAGCATGAATCACGAATCATCAAAA	intronic antisense	ENST00000432382	CTC-203F4.1	HCG2045138; Uncharacterized protein [Source:UniProtKB/TrEMBL;Acc:G3V3D3]	+	134368969	134680375	6.29405	7.6951
ASHGA5P043143	0.00504612	0.0274839	2.63674	down	noncoding	ENST00000458474	AC004878.7	GENCODE	307	chr7	-	74856620	74857439	TCCACTCTGGCTCTGTCTACTCCCTTCCCAACACATGCCCTATTTTAGGTAACCATGGTA	intron sense-overlapping	NM_001145064	GATSL2	GATS-like protein 2	-	74807604	74867341	7.89578	9.29454
ASHGA5P035407	0.0481307	0.100161	2.63488	down	noncoding	ENST00000420211	RP11-422P22.1	GENCODE	491	chr1	+	18712322	18715008	AAAGCCCTTCCTTAAATCCTTTAAAGCCTAGGCTTAGGGGATTGGGCTCCTGCTTTAAGA	intergenic							4.62481	6.02255
ASHGA5P021975	0.0117659	0.0446686	2.63095	down	noncoding	ENST00000546103	RP11-90J7.3	GENCODE	1267	chr10	+	80008496	80311112	AGCCAGAACATGGATGTTGTTGCCAAGGAAACCACCTCCTTCCTCCTGTGACAAGGCATC	intergenic							5.95995	7.35554
ASHGA5P020509	0.0187754	0.0588327	2.63064	down	noncoding	NR_047513	SLC9B1	RefSeq	1627	chr4	-	103806204	103940896	TATTCTAATAAGAGCTGGGCTTGGACTCGATCCACAGTTTTGTTCTAGGTGCTGTCTCTC	exon sense-overlapping	NM_001100874	SLC9B1	sodium/hydrogen exchanger 9B1 isoform 2	-	103806204	103940896	2.94086	4.33628
ASHGA5P020509	0.0187754	0.0588327	2.63064	down	noncoding	NR_047513	SLC9B1	RefSeq	1627	chr4	-	103806204	103940896	TATTCTAATAAGAGCTGGGCTTGGACTCGATCCACAGTTTTGTTCTAGGTGCTGTCTCTC	exon sense-overlapping	NM_139173	SLC9B1	sodium/hydrogen exchanger 9B1 isoform 1	-	103822084	103940896	2.94086	4.33628
ASHGA5P020509	0.0187754	0.0588327	2.63064	down	noncoding	NR_047513	SLC9B1	RefSeq	1627	chr4	-	103806204	103940896	TATTCTAATAAGAGCTGGGCTTGGACTCGATCCACAGTTTTGTTCTAGGTGCTGTCTCTC	natural antisense	NM_001008388	CISD2	CDGSH iron-sulfur domain-containing protein 2	+	103790134	103813963	2.94086	4.33628
ASHGA5P029622	0.0202153	0.0610659	2.62994	down	noncoding	TCONS_00008291	XLOC_003741	LincRNAs identified by Cabili et al	221	chr4	+	153602154	153602597	TAGTGTTGAGGCATCAGACACATCTCATCTCTAAACCTTTCCCTGCAGATCACCATCTGA	intergenic							3.65642	5.05145
ASHGA5P055950	0.00186911	0.0158995	2.62959	down	noncoding	ENST00000551395	RP11-966I7.1	GENCODE	602	chr14	-	29198288	29234483	GGTGGAGAAGCATAAATGAAAGGCACCTTTTCCTTCCTCTAGAAGGTAAATAATTATAAA	bidirectional	ENST00000382535	FOXG1	forkhead box G1 [Source:HGNC Symbol;Acc:3811]	+	29235049	29238870	2.88976	4.28459
ASHGA5P057201	0.00021481	0.00511826	2.62614	down	noncoding	TCONS_00014459	XLOC_006677	LincRNAs identified by Cabili et al	1854	chr7	-	157230889	157232826	AAGGAGGTGCTCCTGGAGGTGATGGAGGTGCCCCTGGAGGTGATAGTGAAGGAGGTGCTC	intergenic							4.04418	5.43713
ASHGA5P051426	0.00182415	0.0157181	2.62567	down	noncoding	ENST00000448208	SGOL1-AS1	GENCODE	819	chr3	+	20215735	20227919	AACCCTCCGTCTCTTTTTCATCTGTGTATTTCAGTGCTCTTTTAGCTAGAGGCCTGGTGA	natural antisense	NM_001012409	SGOL1	shugoshin-like 1 isoform A1	-	20209935	20227698	5.20842	6.6011
ASHGA5P051426	0.00182415	0.0157181	2.62567	down	noncoding	ENST00000448208	SGOL1-AS1	GENCODE	819	chr3	+	20215735	20227919	AACCCTCCGTCTCTTTTTCATCTGTGTATTTCAGTGCTCTTTTAGCTAGAGGCCTGGTGA	natural antisense	NM_001012410	SGOL1	shugoshin-like 1 isoform A2	-	20202084	20227698	5.20842	6.6011
ASHGA5P051426	0.00182415	0.0157181	2.62567	down	noncoding	ENST00000448208	SGOL1-AS1	GENCODE	819	chr3	+	20215735	20227919	AACCCTCCGTCTCTTTTTCATCTGTGTATTTCAGTGCTCTTTTAGCTAGAGGCCTGGTGA	natural antisense	NM_001012411	SGOL1	shugoshin-like 1 isoform B1	-	20209935	20227698	5.20842	6.6011
ASHGA5P051426	0.00182415	0.0157181	2.62567	down	noncoding	ENST00000448208	SGOL1-AS1	GENCODE	819	chr3	+	20215735	20227919	AACCCTCCGTCTCTTTTTCATCTGTGTATTTCAGTGCTCTTTTAGCTAGAGGCCTGGTGA	natural antisense	NM_001012412	SGOL1	shugoshin-like 1 isoform B2	-	20202084	20227698	5.20842	6.6011
ASHGA5P051426	0.00182415	0.0157181	2.62567	down	noncoding	ENST00000448208	SGOL1-AS1	GENCODE	819	chr3	+	20215735	20227919	AACCCTCCGTCTCTTTTTCATCTGTGTATTTCAGTGCTCTTTTAGCTAGAGGCCTGGTGA	natural antisense	NM_001012413	SGOL1	shugoshin-like 1 isoform C1	-	20209935	20227698	5.20842	6.6011
ASHGA5P051426	0.00182415	0.0157181	2.62567	down	noncoding	ENST00000448208	SGOL1-AS1	GENCODE	819	chr3	+	20215735	20227919	AACCCTCCGTCTCTTTTTCATCTGTGTATTTCAGTGCTCTTTTAGCTAGAGGCCTGGTGA	natural antisense	NM_001199251	SGOL1	shugoshin-like 1 isoform A1	-	20209935	20227724	5.20842	6.6011
ASHGA5P051426	0.00182415	0.0157181	2.62567	down	noncoding	ENST00000448208	SGOL1-AS1	GENCODE	819	chr3	+	20215735	20227919	AACCCTCCGTCTCTTTTTCATCTGTGTATTTCAGTGCTCTTTTAGCTAGAGGCCTGGTGA	natural antisense	NM_001199252	SGOL1	shugoshin-like 1 isoform A2	-	20202084	20227724	5.20842	6.6011
ASHGA5P051426	0.00182415	0.0157181	2.62567	down	noncoding	ENST00000448208	SGOL1-AS1	GENCODE	819	chr3	+	20215735	20227919	AACCCTCCGTCTCTTTTTCATCTGTGTATTTCAGTGCTCTTTTAGCTAGAGGCCTGGTGA	natural antisense	NM_001199253	SGOL1	shugoshin-like 1 isoform B1	-	20209935	20227724	5.20842	6.6011
ASHGA5P051426	0.00182415	0.0157181	2.62567	down	noncoding	ENST00000448208	SGOL1-AS1	GENCODE	819	chr3	+	20215735	20227919	AACCCTCCGTCTCTTTTTCATCTGTGTATTTCAGTGCTCTTTTAGCTAGAGGCCTGGTGA	natural antisense	NM_001199254	SGOL1	shugoshin-like 1 isoform B2	-	20202084	20227724	5.20842	6.6011
ASHGA5P051426	0.00182415	0.0157181	2.62567	down	noncoding	ENST00000448208	SGOL1-AS1	GENCODE	819	chr3	+	20215735	20227919	AACCCTCCGTCTCTTTTTCATCTGTGTATTTCAGTGCTCTTTTAGCTAGAGGCCTGGTGA	natural antisense	NM_001199255	SGOL1	shugoshin-like 1 isoform C1	-	20209935	20227724	5.20842	6.6011
ASHGA5P051426	0.00182415	0.0157181	2.62567	down	noncoding	ENST00000448208	SGOL1-AS1	GENCODE	819	chr3	+	20215735	20227919	AACCCTCCGTCTCTTTTTCATCTGTGTATTTCAGTGCTCTTTTAGCTAGAGGCCTGGTGA	natural antisense	NM_001199256	SGOL1	shugoshin-like 1 isoform C2	-	20202084	20227724	5.20842	6.6011
ASHGA5P051426	0.00182415	0.0157181	2.62567	down	noncoding	ENST00000448208	SGOL1-AS1	GENCODE	819	chr3	+	20215735	20227919	AACCCTCCGTCTCTTTTTCATCTGTGTATTTCAGTGCTCTTTTAGCTAGAGGCCTGGTGA	natural antisense	NM_001199257	SGOL1	shugoshin-like 1 isoform D1	-	20202084	20227724	5.20842	6.6011
ASHGA5P051426	0.00182415	0.0157181	2.62567	down	noncoding	ENST00000448208	SGOL1-AS1	GENCODE	819	chr3	+	20215735	20227919	AACCCTCCGTCTCTTTTTCATCTGTGTATTTCAGTGCTCTTTTAGCTAGAGGCCTGGTGA	natural antisense	NM_138484	SGOL1	shugoshin-like 1 isoform C2	-	20202084	20227698	5.20842	6.6011
ASHGA5P029323	0.0227837	0.0650632	2.61955	down	noncoding	TCONS_00010236	XLOC_004700	LincRNAs identified by Cabili et al	1974	chr5	-	1043115	1045405	ACACTAACCCACCCACTTATTCACACACTCATTCACACAACCCAACTTATTCACACACTA	intergenic							7.40104	8.79036
ASHGA5P050316	0.0119815	0.0451681	2.61858	down	noncoding	TCONS_00015389	XLOC_006972	LincRNAs identified by Cabili et al	267	chr8	-	1236493	1237155	GAAACTAGTTCCCCTCCTAACAGAACCACATACACACACACGCTGAACCAAAACTAGTTC	intergenic							6.62945	8.01824
ASHGA5P041981	0.00251653	0.0185047	2.61816	down	noncoding	DA195606		LincRNAs identified by Khalil et al	564	chr14	+	51741818	51742382	TTAAGTTACTTGGGTTTGGCAGCTCAGTCTGTGTGTGTTAGGGTGTGTTCTTATATCATT	intergenic							3.73033	5.11888
ASHGA5P037631	0.00135597	0.0136076	2.61155	down	noncoding	TCONS_00016451	XLOC_007813	LincRNAs identified by Cabili et al	2285	chr9	-	106846769	106854049	AGCTCTTCTCACAGGGACCCGAGTGAATCCTTTCTCCTTGGAACAAAGGACAAGAAAAAA	intergenic							4.76664	6.15155
ASHGA5P016715	0.0472219	0.0990772	2.60825	down	noncoding	ENST00000433303	AL035610.2	GENCODE	276	chr21	-	29535920	29542462	GAAACAAAAGATTACAGCAAAGCTTTCTGCTTTCCTTTCTTGCTCTGATACCCTCAAAAT	intergenic							7.78245	9.16553
ASHGA5P047981	0.00323355	0.0213483	2.60658	down	noncoding	TCONS_00014153	XLOC_006132	LincRNAs identified by Cabili et al	245	chr7	+	65292533	65293652	TAAAGATGACTCTGAAGAATGGCATGGGATGGATCCTTTTGAATGCACTCAAGCAGGGGT	intergenic							4.19193	5.57409
ASHGA5P040556	0.0388495	0.0882043	2.60626	down	noncoding	uc011cub.2	LINC00461	UCSC_knowngene	3359	chr5	-	87960262	87974262	ACCCACCCTCTTCCCCAACACCCACCTAGCCAGCGAGTCACCGAGCCACCGGCCCTCGGG	intergenic							10.7412	12.1232
ASHGA5P033112	0.000624561	0.009334	2.60577	down	noncoding	TCONS_00028559	XLOC_013547	LincRNAs identified by Cabili et al	815	chr20	+	46683232	46692077	ATATGCATGAGTACTCTATGTTCCCATCATTCCTCCTTCCAGAACATTGCCACATCTGAG	intergenic							3.67632	5.05803
ASHGA5P029465	0.00258495	0.0188128	2.60568	down	noncoding	ENST00000557368	CTD-2201G16.1	GENCODE	207	chr14	+	23884547	23884895	CTCCTCAGCATTCCTGCACTCCTGCACTGCCTCCTCCACTTCAGTCTGGAGCTGGGACAG	natural antisense	NM_000257	MYH7	myosin-7	-	23881946	23904870	7.47968	8.86134
ASHGA5P033369	0.00443937	0.0255049	2.60225	down	noncoding	TCONS_00028465	XLOC_013838	LincRNAs identified by Cabili et al	586	chr20	-	61416929	61423462	GGAGCTGCTTTCTCTCTGCTCCACTTCTACAGAGAAAGAAAATCACAAGCATTTCCCACA	intergenic							3.29093	4.67069
ASHGA5P023403	0.000968548	0.0115359	2.60015	down	noncoding	ENST00000580200	RP11-757O6.1	GENCODE	566	chr18	+	14244623	14252139	CTTGACTGAGGTATCAACCTATGTTATCTCCTCCATCAGAAAGCCCATGATATTGACATA	intergenic							4.05166	5.43026
ASHGA5P055397	0.00833295	0.0362615	2.59656	down	noncoding	TCONS_00028418	XLOC_013771	LincRNAs identified by Cabili et al	4712	chr20	-	46523115	46528274	GAACAAGACTTCTCCTCCCCAGGGTGCCAGCTACCGGACCTTCAACTTACATCAACATTG	intergenic							6.36872	7.74532
ASHGA5P049201	0.0170577	0.0557633	2.59522	down	noncoding	uc021thk.1	IGH	UCSC_knowngene	377	chr16	-	33752510	33752887	GCTATGTGTGGCAGTTTCTGACCAGGATGTCTCTGTGTTTGCAGGTGTGCAGTGTGAGGT	intergenic							3.18241	4.55827
ASHGA5P056695	0.0257386	0.070294	2.58958	down	noncoding	TCONS_00007884	XLOC_004128	LincRNAs identified by Cabili et al	571	chr4	-	153662549	153667773	CCCCTGGACCATCACGGACACCGAGCTTCAGGTAACTCTCACAGTGGAGGAAGGCAGGAA	intergenic							6.01044	7.38315
ASHGA5P043736	0.025012	0.0691665	2.58664	down	noncoding	ENST00000448088	AC004878.8	GENCODE	280	chr7	+	74862850	74863847	AGTATCCCTGGGAGAAGAAAACAGCTCTGGTAGCAGATCACTCAAGCCCGGGAGGTGTAG	intronic antisense	NM_001145064	GATSL2	GATS-like protein 2	-	74807604	74867341	3.20398	4.57506
ASHGA5P035012	0.0316346	0.0787194	2.5847	down	noncoding	ENST00000413669	AC009236.1	GENCODE	343	chr2	-	45401480	45402350	GTTGTCTTCCCTTCCTAGAAGCAATGCTTCTATGTTCTCATTTGATGTTGAATAAAACAT	intergenic							4.03951	5.40951
ASHGA5P037761	0.0107732	0.0425074	2.58448	down	noncoding	ENST00000414483	LL22NC03-121E8.4	GENCODE	498	chr22	-	48535277	48536818	CATCTTCCTCAGACTCCAGCAGGCCCTCCACTCCTAGCACACAGGCCGGATTGAATCTTC	intergenic							7.72399	9.09386
ASHGA5P000296	0.000800694	0.0105625	2.5827	down	noncoding	chr16:82854175-82865325+	chr16:82854175-82865325	LincRNAs identified by Khalil et al	11150	chr16	+	84296674	84307824	TGTTTTGCCATCCATTAACCCTTTAATCCATTAATCAATTTTCCTTCCATCCACCAGTTT	intergenic							3.72615	5.09503
ASHGA5P029070	0.00545083	0.0288366	2.58239	down	noncoding	TCONS_00010352	XLOC_004841	LincRNAs identified by Cabili et al	487	chr5	-	60617341	60627805	ACTTCCCCCTCCAGTTCTCAGCTTCTCTTTGAAGTCCGAGAAGTGAGGATGCGCCTCGTG	intergenic							7.46231	8.83102
ASHGA5P027988	0.019653	0.0602061	2.5817	down	noncoding	ENST00000440688	RP5-1028L10.2	GENCODE	508	chr1	-	110720264	110721341	TGTGTCATCCTGCATGAACTGTTTGTGTAAAGGGGTGTGTGTGTGTACACACATGTGCAA	intronic antisense	NM_001010898	SLC6A17	sodium-dependent neutral amino acid transporter SLC6A17	+	110693131	110744823	3.31973	4.68805
ASHGA5P055398	0.00244926	0.018254	2.58076	down	noncoding	TCONS_00016512	XLOC_007895	LincRNAs identified by Cabili et al	301	chr9	-	139166405	139166839	AATGTGGTGGCCAAGCCAGCCTCTGCAGGTGACGGTGTCTTCAAAACCCCACCCAGGCCT	intergenic							6.15897	7.52677
ASHGA5P051474	0.0171209	0.0559037	2.58029	down	noncoding	ENST00000452738	BX571672.2	GENCODE	661	chr1	-	143193888	143195886	CTTGACTGAGGTTAGTTATATGACCGTTTCTCTTTAGGGTTTCATTTCTCTAGCGTAATT	intergenic							3.62116	4.98869
ASHGA5P033332	0.000444336	0.00761566	2.58027	down	noncoding	uc002jim.3	BX647864	UCSC_knowngene	1045	chr17	+	68047417	68064236	CCCTCCACAGAGATATCAATTTGCATAAGAGGAGAAAATAAATTCATTTAAACCCCATTC	intergenic							2.96457	4.3321
ASHGA5P036864	0.0108451	0.0427022	2.57929	down	noncoding	ENST00000441270	RP1-309F20.3	GENCODE	927	chr20	-	57438582	57463881	TTTTCCTTCCCATTATCAACTCATTAAAGGAAGTTAAAAGTACTTACTCTGTCCCACACA	intronic antisense	NM_001077490	GNAS	protein ALEX alex	+	57428035	57486250	3.17662	4.5436
ASHGA5P036864	0.0108451	0.0427022	2.57929	down	noncoding	ENST00000441270	RP1-309F20.3	GENCODE	927	chr20	-	57438582	57463881	TTTTCCTTCCCATTATCAACTCATTAAAGGAAGTTAAAAGTACTTACTCTGTCCCACACA	intronic antisense	NM_016592	GNAS	protein ALEX NESP55	+	57414794	57486250	3.17662	4.5436
ASHGA5P036864	0.0108451	0.0427022	2.57929	down	noncoding	ENST00000441270	RP1-309F20.3	GENCODE	927	chr20	-	57438582	57463881	TTTTCCTTCCCATTATCAACTCATTAAAGGAAGTTAAAAGTACTTACTCTGTCCCACACA	intronic antisense	NM_080425	GNAS	protein ALEX XLas	+	57428035	57486250	3.17662	4.5436
ASHGA5P000492	0.0123719	0.0461626	2.5749	down	noncoding	chr7:125011450-125108750+	chr7:125011450-125108750	LincRNAs identified by Khalil et al	97300	chr7	+	125224214	125321514	CCTCCAATATACATTTCTACATGTTTGCTCTCCACTTGTCAGTGAAATGTGAAGTGACTA	intergenic							3.43529	4.79981
ASHGA5P042030	0.0425758	0.0932965	2.57476	down	noncoding	ENST00000442449	RP1-69D17.3	GENCODE	391	chr6	-	129800759	129802555	CCTTCATTTCCCTAATTCTATTGGAGTGGTTTAAGATAATTTTGATTAGAAGCAGCAGAC	natural antisense	NM_000426	LAMA2	laminin subunit alpha-2 isoform a precursor	+	129204285	129837710	5.59537	6.95981
ASHGA5P042030	0.0425758	0.0932965	2.57476	down	noncoding	ENST00000442449	RP1-69D17.3	GENCODE	391	chr6	-	129800759	129802555	CCTTCATTTCCCTAATTCTATTGGAGTGGTTTAAGATAATTTTGATTAGAAGCAGCAGAC	natural antisense	NM_001079823	LAMA2	laminin subunit alpha-2 isoform b precursor	+	129204285	129837710	5.59537	6.95981
ASHGA5P055659	0.00205649	0.0167221	2.57407	down	noncoding	ENST00000544339	RP11-728G15.1	GENCODE	496	chr12	-	121067907	121077956	CTAAAGGAGATCTATTCCCTCCCCTTCTAAGAGGACCTCATTAAAGAGTGGAATGATTTC	bidirectional	NM_001033677	CABP1	calcium-binding protein 1 isoform 3	+	121078421	121105127	7.7961	9.16015
ASHGA5P051477	0.0167149	0.0552833	2.57275	down	noncoding	ENST00000427309	BX571672.5	GENCODE	677	chr1	-	143229765	143233121	TGCTACTAAGGTAAAGTGGTCTCTTGTAAAATTAATCTTCTCACTCTGAGTGTAGTTTTG	intergenic							3.39628	4.75959
ASHGA5P042966	0.00153816	0.0143901	2.56794	down	noncoding	TCONS_00019669	XLOC_009474	LincRNAs identified by Cabili et al	3579	chr11	-	65266537	65278491	GAAGCTTCATCTCAACCTCCGTCATGTTTTAGAAACCTTTTATCTTTTCCTTCCTCATGC	intergenic							6.41378	7.77439
ASHGA5P035955	0.00171924	0.0153022	2.56453	down	noncoding	ENST00000451622	AC007099.1	GENCODE	1101	chr2	+	75767864	75769832	AGCAATAAAAACAGAAGACACCAACACCAGCAGTCCAGAGACCTCCAGTATAACATAAAG	intronic antisense	NM_001135032	FAM176A	protein FAM176A	-	75719443	75788092	3.554	4.91269
ASHGA5P035955	0.00171924	0.0153022	2.56453	down	noncoding	ENST00000451622	AC007099.1	GENCODE	1101	chr2	+	75767864	75769832	AGCAATAAAAACAGAAGACACCAACACCAGCAGTCCAGAGACCTCCAGTATAACATAAAG	intronic antisense	NM_032181	FAM176A	protein FAM176A	-	75719443	75796848	3.554	4.91269
ASHGA5P037683	0.010695	0.0423307	2.56278	down	noncoding	TCONS_00024376	XLOC_011699	LincRNAs identified by Cabili et al	486	chr16	+	34477760	34479038	TTATTTGTGTTTTCATCTATAGGAGTTCTGCAATAAAATGCCTGCTTTCTCCACCAGATG	intergenic							3.41124	4.76895
ASHGA5P032958	0.00112414	0.0122817	2.556	down	noncoding	ENST00000439136	AC087294.2	GENCODE	487	chr17	+	21117643	21133348	CATCTCCATTTGATCCCATCATAAACCTCAAGAAAAGTAAAAAGCATCATCATCTTAGGA	natural antisense	NM_003876	TMEM11	transmembrane protein 11, mitochondrial	-	21101262	21117908	3.51897	4.87286
ASHGA5P028586	0.016373	0.0546897	2.5559	down	noncoding	ENST00000447389	BX571672.2	GENCODE	1410	chr1	-	143188794	143196803	CCAAGTCATCATTGATACTTTAGTAAAGGTTAGTAAAGGTCATCGAAGGCTTATTTGCAT	intergenic							2.91908	4.27291
ASHGA5P036527	0.0316819	0.0787277	2.55071	down	noncoding	TCONS_00027223	XLOC_013263	LincRNAs identified by Cabili et al	3291	chr19	-	21744135	21752048	TTTTATTTTATTTTGGGGGGAGACCCAGGCTGGAGTCTGGGCGCCCACTGTCCTGTGATG	intergenic							4.81191	6.1628
ASHGA5P031972	0.00050556	0.00821408	2.54501	down	noncoding	ENST00000567093	CTD-2542L18.1	GENCODE	3455	chr16	+	85625871	85629326	GACTTTGTAATGCCAGATCTTTTCTGTGTTTTAACATTCCTCCATCCATCATCTACCCAT	intergenic							3.32319	4.67086
ASHGA5P044704	3.30509e-05	0.00175151	2.5436	down	noncoding	ENST00000511897	RP11-87E22.2	GENCODE	3879	chr8	+	22735496	22745535	GGTTAGCTTTTCACTGTGACCCTTATCTGTACACCTGCTAACTCAAAATAATTTAATAAC	intronic antisense	NM_144962	PEBP4	phosphatidylethanolamine-binding protein 4 precursor	-	22570764	22785421	3.63991	4.98679
ASHGA5P023909	0.0441883	0.0955134	2.5423	down	noncoding	HMlincRNA918-	HMlincRNA918	LincRNAs identified by Khalil et al	13700	chr20	-	23590410	23604110	GGTTTTCCTCTCTCGTTTTTACTTTTTCTCTGTTCCTGTTTTGAAAGTGAAACTGAAGCA	intergenic							4.54697	5.89311
ASHGA5P031411	0.011357	0.043819	2.54183	down	noncoding	ENST00000565310	RP11-104N10.1	GENCODE	405	chr16	-	89558810	89560201	TCTCTACTCCATCTGCACTGCTGTCTCTGTGCGTTCATCATCTCACAGCCATCCTTTCAT	intergenic							4.6444	5.99026
ASHGA5P028385	0.00030253	0.0061826	2.54082	down	noncoding	uc001uid.3	BC035922	UCSC_knowngene	593	chr12	+	129595537	129597841	TACCAAGATGAAATCCACCCATCATTTCTGAATGGCTCAGTTTTGATTTCATCTCCCAAG	intronic antisense	NM_133448	TMEM132D	transmembrane protein 132D precursor	-	129556270	130388212	3.00674	4.35204
ASHGA5P054912	0.000503018	0.00821408	2.53842	down	noncoding	ENST00000537869	SNHG1	GENCODE	1038	chr11	-	62619462	62622932	GGACTGGCTGTCAATTTGTGTTGCTGTGTTGGTTGTTGATGAAAATAATAAAATGATTGA	bidirectional	NM_001012662	SLC3A2	4F2 cell-surface antigen heavy chain isoform b	+	62623483	62656355	8.64255	9.98649
ASHGA5P054912	0.000503018	0.00821408	2.53842	down	noncoding	ENST00000537869	SNHG1	GENCODE	1038	chr11	-	62619462	62622932	GGACTGGCTGTCAATTTGTGTTGCTGTGTTGGTTGTTGATGAAAATAATAAAATGATTGA	bidirectional	NM_001012664	SLC3A2	4F2 cell-surface antigen heavy chain isoform e	+	62623483	62656355	8.64255	9.98649
ASHGA5P054912	0.000503018	0.00821408	2.53842	down	noncoding	ENST00000537869	SNHG1	GENCODE	1038	chr11	-	62619462	62622932	GGACTGGCTGTCAATTTGTGTTGCTGTGTTGGTTGTTGATGAAAATAATAAAATGATTGA	bidirectional	NM_002394	SLC3A2	4F2 cell-surface antigen heavy chain isoform c	+	62623483	62656355	8.64255	9.98649
ASHGA5P045578	0.00216985	0.0171882	2.53343	down	noncoding	TCONS_00015184	XLOC_007240	LincRNAs identified by Cabili et al	337	chr8	-	142208033	142209262	ACCACCAAAGTGAAGGTGAGTTTACCCTCTCCCTCATCCCAGGATCCTCCCTGAATGGGC	intergenic							7.06034	8.40144
ASHGA5P038544	0.00231388	0.0177474	2.5312	down	noncoding	ENST00000416017	RP4-612J11.1	GENCODE	588	chr1	+	75055418	75087403	GGCTTGGTCTCCACATCTGCTTTTGTTATTTCTTGGTCTTCAATTTCAATTTCTAAGGAT	natural antisense	NM_001002912	C1orf173	uncharacterized protein C1orf173	-	75033794	75139422	4.28676	5.62657
ASHGA5P048510	0.00881673	0.0373961	2.52974	down	noncoding	BG953017R		LincRNAs identified by Khalil et al	286	chr4	-	184736396	184736595	TAGTATTTTGCTAAGATTAAGCCTCTTTTGACTACAATTCCATTTCCCCACTTATGCATC	intergenic							3.42489	4.76388
ASHGA5P030121	0.04563	0.0972843	2.52921	down	noncoding	ENST00000558702	RP11-253M7.4	GENCODE	391	chr15	-	69750860	69754145	GCAAAAGGGAAGTAACAAGTATTGAATGTTCACTTACCTCTTTCATTCCCCAATATGAAA	intergenic							4.9467	6.28539
ASHGA5P031207	0.00737673	0.0336715	2.52853	down	noncoding	ENST00000446102	RP11-576I22.2	GENCODE	1363	chr1	-	170430457	170463681	AGATAGGCATTCATTGTCAGATGTTTATGCTCTCCATTCCTGAAACTCCTCCTGTCTGTG	intergenic							5.00649	6.3448
ASHGA5P020870	0.022015	0.0637565	2.52755	down	noncoding	ENST00000521149	RP11-981G7.4	GENCODE	577	chr8	-	10340433	10375525	AGTCCAGAATGAGTAGAATCCTGTTTCCTTCTGAAGCCCTTCCTAATTGATATACTTAGG	intergenic							7.02136	8.35911
ASHGA5P034490	0.0015031	0.014274	2.52482	down	noncoding	TCONS_00003822	XLOC_001630	LincRNAs identified by Cabili et al	290	chr2	+	113696551	113698598	AATGCTTTCAGACAGACTTGGTATAAAGCCACCACCTCTTTCTATTATGGCAGCCCTATC	intergenic							3.71365	5.04983
ASHGA5P028376	0.000910624	0.0110777	2.52422	down	noncoding	ENST00000544711	RP11-407A16.7	GENCODE	339	chr12	+	127175024	127176464	GATGTCCCACAGCCCATAGCAAATACAGGGCATATTAAGTTCAAATAAATATATGCAAAT	intergenic							3.46696	4.8028
ASHGA5P030342	0.000104861	0.00353275	2.52196	down	noncoding	NR_040094	LOC348120	RefSeq	3417	chr15	+	21145766	21198633	ATAATATCCTCCTATCTCTGAAAGAACAAGTTCCATCTCCATTTTCCAGGAGAGTTTTTT	intergenic							3.65482	4.98937
ASHGA5P030169	0.0117186	0.0445596	2.51592	down	noncoding	ENST00000563867	RP11-114H24.4	pseudogene	380	chr15	-	78233783	78235089	TTCATGCTCTCCGGAACTGCCAAGCACAGTGTCGATGGCGAATCCTTGGCCAGTGAACTG								4.38449	5.71557
ASHGA5P055647	0.0184607	0.0583297	2.50908	down	noncoding	uc001azg.1	CROCCP2	UCSC_knowngene	1912	chr1	-	16951872	16971178	AGCAGCTAGCACAGGTAGGCCAAACTGTGTGTGGGGTGGTCTGGAGAGCATGTGGGGCAG	intergenic							5.43125	6.75841
ASHGA5P031728	0.0041169	0.0244684	2.50798	down	noncoding	NR_033985	FLJ26245	RefSeq	1598	chr16	+	34980922	34990995	GGCTTCCCGCTCCCTTCCCACTTTTCCCTGCTTGTTACAACATTTCCCGATTCTGTGACC	intergenic							10.0505	11.3771
ASHGA5P044314	6.69219e-05	0.00271844	2.50685	down	noncoding	uc003xxw.1	AX747593	UCSC_knowngene	2278	chr8	-	69214471	69216749	ATGCTTCTCCTAGATCTTTCCACATGCTCTGCCATTAATTAGAGTTCAATGTTCAATTTT	exon sense-overlapping	ENST00000512294	RP11-664D7.4	HCG1787533; Uncharacterized protein [Source:UniProtKB/TrEMBL;Acc:G3XAN2]	-	69215702	69243726	3.09083	4.41671
ASHGA5P020981	0.0210443	0.0623682	2.5046	down	noncoding	ENST00000523024	RP11-981G7.4	GENCODE	1123	chr8	-	10340387	10405095	AATGGGTATGAGTAGAATCCTGTTTCCTTCTGAAGCCCTTCCTAATTGATATACTTAGGG	intronic antisense	NM_001197020	PRSS55	serine protease 55 isoform 2 precursor	+	10383055	10411676	6.90249	8.22707
ASHGA5P020981	0.0210443	0.0623682	2.5046	down	noncoding	ENST00000523024	RP11-981G7.4	GENCODE	1123	chr8	-	10340387	10405095	AATGGGTATGAGTAGAATCCTGTTTCCTTCTGAAGCCCTTCCTAATTGATATACTTAGGG	intronic antisense	NM_198464	PRSS55	serine protease 55 isoform 1 precursor	+	10383055	10396333	6.90249	8.22707
ASHGA5P041084	0.00430905	0.0251321	2.50458	down	noncoding	ENST00000508923	CTD-2089N3.3	GENCODE	432	chr5	+	50265493	50266021	GTTCCCCCTCTCCACGCGTACGCACACTCATTTTTAGTTTTAACAAATGATTTAAAAATC	intergenic							8.34888	9.67345
ASHGA5P043244	0.00101042	0.0116318	2.50423	down	noncoding	ENST00000451953	RP5-1059M17.1	GENCODE	579	chr7	-	101206058	101212251	ATGTTTCACTGTTTAGCACTGGATCTGTCCTCACCATATTAAGGACCAACTCACACCCAG	intergenic							3.3297	4.65407
ASHGA5P030094	0.0241453	0.0674883	2.50315	down	noncoding	ENST00000432858	RP11-243J18.2	GENCODE	157	chr1	-	155679888	155680354	TTTTATTTTTTATTCTATTTTAGATGCTAAAGCTGTAAATTGGCAACTTGTTTTTCTTTT	intronic antisense	NM_001199849	DAP3	28S ribosomal protein S29, mitochondrial isoform 1	+	155658881	155708800	3.26043	4.58418
ASHGA5P030094	0.0241453	0.0674883	2.50315	down	noncoding	ENST00000432858	RP11-243J18.2	GENCODE	157	chr1	-	155679888	155680354	TTTTATTTTTTATTCTATTTTAGATGCTAAAGCTGTAAATTGGCAACTTGTTTTTCTTTT	intronic antisense	NM_001199850	DAP3	28S ribosomal protein S29, mitochondrial isoform 2	+	155658881	155708800	3.26043	4.58418
ASHGA5P030094	0.0241453	0.0674883	2.50315	down	noncoding	ENST00000432858	RP11-243J18.2	GENCODE	157	chr1	-	155679888	155680354	TTTTATTTTTTATTCTATTTTAGATGCTAAAGCTGTAAATTGGCAACTTGTTTTTCTTTT	intronic antisense	NM_001199851	DAP3	28S ribosomal protein S29, mitochondrial isoform 3	+	155658881	155708800	3.26043	4.58418
ASHGA5P030094	0.0241453	0.0674883	2.50315	down	noncoding	ENST00000432858	RP11-243J18.2	GENCODE	157	chr1	-	155679888	155680354	TTTTATTTTTTATTCTATTTTAGATGCTAAAGCTGTAAATTGGCAACTTGTTTTTCTTTT	intronic antisense	NM_004632	DAP3	28S ribosomal protein S29, mitochondrial isoform 1	+	155658884	155708800	3.26043	4.58418
ASHGA5P030094	0.0241453	0.0674883	2.50315	down	noncoding	ENST00000432858	RP11-243J18.2	GENCODE	157	chr1	-	155679888	155680354	TTTTATTTTTTATTCTATTTTAGATGCTAAAGCTGTAAATTGGCAACTTGTTTTTCTTTT	intronic antisense	NM_033657	DAP3	28S ribosomal protein S29, mitochondrial isoform 1	+	155658884	155708800	3.26043	4.58418
ASHGA5P037974	0.000899358	0.0110338	2.50293	down	noncoding	ENST00000428838	RP5-1177I5.3	GENCODE	498	chr22	+	37946032	37947742	CTGTGTCTGGCAATCAGGAGATGCTCAGTTAATGCTCCTCCTGCTTCTGCTCTTCTTCTT	intergenic							3.52668	4.8503
ASHGA5P057970	0.0167063	0.0552833	2.50266	down	noncoding	TCONS_00024490	XLOC_011810	LincRNAs identified by Cabili et al	462	chr16	+	86052352	86061287	TAAGAGGAAGCAGCAATGCTCTGTGTAAAGACACTCCACACACACACTCAGGAAATGGAA	intergenic							6.02615	7.34961
ASHGA5P050663	0.00259172	0.0188324	2.50226	down	noncoding	ENST00000415574	AC093838.4	pseudogene	3023	chr2	+	132250385	132278255	CTCCCCCCGCACTCCTGCCTCGCCATTTCCCCTCCCTGGCCGGCCGGCCGGCCTTCTTCG								11.4254	12.7486
ASHGA5P045199	0.0365724	0.0850557	2.50113	down	noncoding	ENST00000440200	RP5-857K21.4	GENCODE	413	chr1	-	536815	655580	GTGCTGTGTGAACCTGTGACTTCAGGGCCTGTTGACGTGGTCGTGCTTGCATACTCTCTG	intron sense-overlapping	NM_001005221	OR4F29	olfactory receptor 4F3/4F16/4F29	-	621095	622034	2.90714	4.22972
ASHGA5P045199	0.0365724	0.0850557	2.50113	down	noncoding	ENST00000440200	RP5-857K21.4	GENCODE	413	chr1	-	536815	655580	GTGCTGTGTGAACCTGTGACTTCAGGGCCTGTTGACGTGGTCGTGCTTGCATACTCTCTG	intron sense-overlapping	NM_001005224	OR4F3	olfactory receptor 4F3/4F16/4F29	-	621095	622034	2.90714	4.22972
ASHGA5P045199	0.0365724	0.0850557	2.50113	down	noncoding	ENST00000440200	RP5-857K21.4	GENCODE	413	chr1	-	536815	655580	GTGCTGTGTGAACCTGTGACTTCAGGGCCTGTTGACGTGGTCGTGCTTGCATACTCTCTG	intron sense-overlapping	NM_001005277	OR4F16	olfactory receptor 4F3/4F16/4F29	-	621095	622034	2.90714	4.22972
ASHGA5P022862	0.00792854	0.0352333	2.49973	down	noncoding	NR_040069	LOXL1-AS1	RefSeq	2194	chr15	-	74209808	74220589	AAGCTGGGAGGAGCTCCTGCCTGCCTGGATGAAGAGGAGGTCAAGACTTTGTCCCCCACT	intronic antisense	NM_005576	LOXL1	lysyl oxidase homolog 1 preproprotein	+	74218788	74244478	4.8571	6.17887
ASHGA5P038432	0.000492807	0.00813311	2.49575	down	noncoding	TCONS_00014876	XLOC_006944	LincRNAs identified by Cabili et al	339	chr8	+	142121973	142123085	TGCTTGCTCTTCCCTCTTGAAGTATGGTGAGGATTAAATAATGGAGAAGGTGTAGACAGC	intergenic							3.1984	4.51788
ASHGA5P036223	0.0030269	0.0204776	2.49467	down	noncoding	ENST00000450108	RP11-242O24.5	GENCODE	320	chr1	+	29479000	29479503	TCAAGCCACTCTCCTCCCGTTACCTCTCTATATTAGCTTCTCTACTCTGGAAAACTTTCT	intronic antisense	NM_005626	SRSF4	serine/arginine-rich splicing factor 4	-	29474249	29508637	7.12689	8.44574
ASHGA5P029522	0.00859822	0.0368935	2.49247	down	noncoding	ENST00000556620	RP11-111A21.1	GENCODE	857	chr14	+	39944059	39961974	GGACTTTCCCCTCACCTCCCAAATGTTTATTATGAAAAATTTCATTTTAAAGAAAGGTGG	intergenic							7.25093	8.56851
ASHGA5P048890	0.0398348	0.0893497	2.48953	down	noncoding	uc021suf.1	AK054710	UCSC_knowngene	2315	chr15	+	89939404	89941719	TTGTGGTTTCTGTACCATCACATGCCTATTTTAAGACACTCTCCAGCACTGTCGGTTAGG	intergenic							4.31761	5.63349
ASHGA5P032297	0.0294258	0.0757286	2.48642	down	noncoding	TCONS_00016037	XLOC_007432	LincRNAs identified by Cabili et al	310	chr9	+	88068943	88069347	TAAAGCCAAACCATTCCAGCCACCCTGCAGATCTACCGAGGAGGAAAACTAATGTTTGTT	intergenic							6.94859	8.26266
ASHGA5P046167	0.0215511	0.0630265	2.48493	down	noncoding	ENST00000422410	RP11-344N17.8	GENCODE	270	chrX	-	48193109	48193874	GTGGCCCTTAGGCTTGGGATCTTAGTTCAAAATCATTGTACAAACTAAATTTATTCTACT	intergenic							2.83867	4.15187
ASHGA5P016050	0.000186277	0.00479794	2.48301	down	noncoding	ENST00000426270	RP11-326F20.5	GENCODE	508	chr9	+	33166972	33179708	GTCTGTTTTGTTTCCTGTTCTTCCCAACCTGCGCTATGGACTTCATCAGATTTCAGCATC	natural antisense	NM_001497	B4GALT1	beta-1,4-galactosyltransferase 1	-	33110638	33167356	4.26738	5.57947
ASHGA5P022105	0.000218807	0.00514705	2.48219	down	noncoding	ENST00000549329	HOXD-AS1	GENCODE	609	chr2	-	177041113	177042770	GTGTCCTCAGCGCTGTGAACAATGGAGCCATCAAAAAGGCCTTCTCCCAGCCTCCTCACC	intergenic							3.41472	4.72633
ASHGA5P019587	0.000111734	0.00364064	2.48189	down	noncoding	NR_045756	COL25A1	RefSeq	4645	chr4	-	109731876	110223523	AAAGAGGTGTCGGTCCTCTGGGAGTCGGAAGAGCTGTCTGGGATTATTTGAGGTGTAGAG	exon sense-overlapping	NM_001256074	COL25A1	collagen alpha-1(XXV) chain isoform 3	-	109745037	110223523	2.89539	4.20683
ASHGA5P019587	0.000111734	0.00364064	2.48189	down	noncoding	NR_045756	COL25A1	RefSeq	4645	chr4	-	109731876	110223523	AAAGAGGTGTCGGTCCTCTGGGAGTCGGAAGAGCTGTCTGGGATTATTTGAGGTGTAGAG	exon sense-overlapping	NM_032518	COL25A1	collagen alpha-1(XXV) chain isoform 2	-	109745038	110223799	2.89539	4.20683
ASHGA5P019587	0.000111734	0.00364064	2.48189	down	noncoding	NR_045756	COL25A1	RefSeq	4645	chr4	-	109731876	110223523	AAAGAGGTGTCGGTCCTCTGGGAGTCGGAAGAGCTGTCTGGGATTATTTGAGGTGTAGAG	exon sense-overlapping	NM_198721	COL25A1	collagen alpha-1(XXV) chain isoform 1	-	109731876	110223799	2.89539	4.20683
ASHGA5P058235	0.00590657	0.0298927	2.48179	down	noncoding	TCONS_00028427	XLOC_013779	LincRNAs identified by Cabili et al	1492	chr20	-	47129932	47133386	TCTTGTTCTGGTCTGAGGGTTGTAGAGCTGGAGACCCAGGGAGAAGCCCGTACTACGGCT	intergenic							5.72068	7.03206
ASHGA5P030554	0.000723332	0.00999976	2.48124	down	noncoding	ENST00000559915	RP11-209E8.1	GENCODE	601	chr15	+	53408561	53421895	GAATTCAAGGGCCAAATGCTTTTTCGGCGTCTCCTTTTCTATCCTTCCCTTTCATGTGAC	intergenic							3.81241	5.12347
ASHGA5P037107	0.00717582	0.0332838	2.48008	down	noncoding	ENST00000424566	RP5-955M13.4	GENCODE	802	chr20	+	49615906	49626556	ACCCCCACCTGTACTTCTTTGGAGACCGGCTGATTAGAGCTGTCTTGCCAGGACACACCA	natural antisense	NM_002237	KCNG1	potassium voltage-gated channel subfamily G member 1	-	49620192	49639675	7.11203	8.42242
ASHGA5P019782	0.0296561	0.0760453	2.47927	down	noncoding	NR_045218	TRIM41	RefSeq	2721	chr5	+	180650262	180662808	GCTGCTCCAGGTGTGAAGAGGTACAGCTGCAGCCCCCAGAGGTCTGGTCCCCTGACCCGT	exon sense-overlapping	NM_033549	TRIM41	E3 ubiquitin-protein ligase TRIM41 isoform 1	+	180650262	180662808	5.00542	6.31533
ASHGA5P019782	0.0296561	0.0760453	2.47927	down	noncoding	NR_045218	TRIM41	RefSeq	2721	chr5	+	180650262	180662808	GCTGCTCCAGGTGTGAAGAGGTACAGCTGCAGCCCCCAGAGGTCTGGTCCCCTGACCCGT	exon sense-overlapping	NM_201627	TRIM41	E3 ubiquitin-protein ligase TRIM41 isoform 2	+	180650262	180662808	5.00542	6.31533
ASHGA5P056380	0.00100315	0.0115948	2.47732	down	noncoding	TCONS_00003829	XLOC_001638	LincRNAs identified by Cabili et al	243	chr2	+	118982819	118983456	TCACCATCCTCCATCCTCCCCTTGATTTTGGGGAGTCAGGAGAGAGGAAATAAATGAAAT	intergenic							6.73615	8.04493
ASHGA5P046755	0.00295105	0.0202618	2.47697	down	noncoding	uc022cjh.1	IGL@	UCSC_knowngene	88	chrY	-	13629636	13629724	CCCTGTCTGCATCTGTAGGAGACAGAGTCACCATCACTTGCCGGGCGAGTCAGGGCATTA	intergenic							3.98126	5.28983
ASHGA5P044096	0.00296614	0.0202986	2.47695	down	noncoding	ENST00000527080	USP17L8	pseudogene	1593	chr8	-	7829182	7830775	TCAAAATACAAGTGTGGGATGAAAAACCACCATCCTGAACAGCAAAGCTCCCTGCTAAAC								3.3668	4.67536
ASHGA5P055774	0.0216331	0.0631584	2.47687	down	noncoding	ENST00000520924	TPT1-AS1	GENCODE	553	chr13	+	45915726	45944465	GCCTCCAATTGTAAGTAGATATTTATCTGTTTACTACGTGTCTCCATCACTAGGCGATAC	bidirectional	NM_003295	TPT1	translationally-controlled tumor protein	-	45911303	45915297	3.7038	5.01232
ASHGA5P028929	0.00515035	0.0278869	2.47665	down	noncoding	TCONS_00010505	XLOC_005024	LincRNAs identified by Cabili et al	745	chr5	-	139531023	139532171	TTAGCAAGTGCTTTTCCCACACTTGAGACTGCCTCTCTCCTCTCTAAGTCCTGGATTTTA	intergenic							5.98029	7.28867
ASHGA5P023135	0.0125279	0.04651	2.47625	down	noncoding	NR_027696	FLJ39653	RefSeq	2547	chr4	+	16228285	16259810	GGTCCTGCAGGTTTTCACTATTTATTTATGACAAATATTCCACATCCGTGATTCTCTCTA	bidirectional	NM_153365	TAPT1	transmembrane anterior posterior transformation protein 1 homolog	-	16162127	16228161	3.7698	5.07795
ASHGA5P019628	0.00593172	0.0299167	2.47579	down	noncoding	NR_028294	PTGER3	RefSeq	2080	chr1	-	71318035	71513491	AAAGAAGACTCAGAGAGCAAGCTCCTCTTCTTCCCACCTCTACTGTGATTGATCCTTCAA	exon sense-overlapping	NM_001126044	PTGER3	prostaglandin E2 receptor EP3 subtype isoform 4	-	71418114	71513491	4.58292	5.89081
ASHGA5P019628	0.00593172	0.0299167	2.47579	down	noncoding	NR_028294	PTGER3	RefSeq	2080	chr1	-	71318035	71513491	AAAGAAGACTCAGAGAGCAAGCTCCTCTTCTTCCCACCTCTACTGTGATTGATCCTTCAA	exon sense-overlapping	NM_198714	PTGER3	prostaglandin E2 receptor EP3 subtype isoform 4	-	71318035	71513491	4.58292	5.89081
ASHGA5P019628	0.00593172	0.0299167	2.47579	down	noncoding	NR_028294	PTGER3	RefSeq	2080	chr1	-	71318035	71513491	AAAGAAGACTCAGAGAGCAAGCTCCTCTTCTTCCCACCTCTACTGTGATTGATCCTTCAA	exon sense-overlapping	NM_198715	PTGER3	prostaglandin E2 receptor EP3 subtype isoform 5	-	71471536	71513491	4.58292	5.89081
ASHGA5P019628	0.00593172	0.0299167	2.47579	down	noncoding	NR_028294	PTGER3	RefSeq	2080	chr1	-	71318035	71513491	AAAGAAGACTCAGAGAGCAAGCTCCTCTTCTTCCCACCTCTACTGTGATTGATCCTTCAA	exon sense-overlapping	NM_198716	PTGER3	prostaglandin E2 receptor EP3 subtype isoform 6	-	71318035	71513491	4.58292	5.89081
ASHGA5P019628	0.00593172	0.0299167	2.47579	down	noncoding	NR_028294	PTGER3	RefSeq	2080	chr1	-	71318035	71513491	AAAGAAGACTCAGAGAGCAAGCTCCTCTTCTTCCCACCTCTACTGTGATTGATCCTTCAA	exon sense-overlapping	NM_198717	PTGER3	prostaglandin E2 receptor EP3 subtype isoform 7	-	71318035	71513491	4.58292	5.89081
ASHGA5P019628	0.00593172	0.0299167	2.47579	down	noncoding	NR_028294	PTGER3	RefSeq	2080	chr1	-	71318035	71513491	AAAGAAGACTCAGAGAGCAAGCTCCTCTTCTTCCCACCTCTACTGTGATTGATCCTTCAA	exon sense-overlapping	NM_198718	PTGER3	prostaglandin E2 receptor EP3 subtype isoform 8	-	71418114	71513491	4.58292	5.89081
ASHGA5P019628	0.00593172	0.0299167	2.47579	down	noncoding	NR_028294	PTGER3	RefSeq	2080	chr1	-	71318035	71513491	AAAGAAGACTCAGAGAGCAAGCTCCTCTTCTTCCCACCTCTACTGTGATTGATCCTTCAA	exon sense-overlapping	NM_198719	PTGER3	prostaglandin E2 receptor EP3 subtype isoform 4	-	71436463	71513491	4.58292	5.89081
ASHGA5P047239	0.0084247	0.0365077	2.47537	down	noncoding	ENST00000417112	RP11-554I8.2	GENCODE	917	chr10	+	6779343	6780988	TGACTTTTGGAAATCTGATTGACTGGCACACTCTCTCTGCCTCTTTCTTTCTCAACATTT	intergenic							5.65897	6.96662
ASHGA5P023711	0.0136024	0.0486619	2.47381	down	noncoding	HMlincRNA158-	HMlincRNA158	LincRNAs identified by Khalil et al	4836	chr6	-	112269457	112274293	CAAGAGCAGAGACAAGCCACTCCCAACATTTCACTTGCCCCATCTGTAAAACAACTTCAA	intergenic							5.78106	7.0878
ASHGA5P050755	0.00666931	0.0319469	2.47234	down	noncoding	ENST00000484406	AC007163.4	GENCODE	669	chr2	+	201560561	201596038	CTGTTCCCAGGTAGGCTGCATCCCTGCCACTTCCTCCTCCTGTCCTGTACAACCTAGGGC	intergenic							7.75819	9.06407
ASHGA5P036755	0.000532271	0.00838986	2.47215	down	noncoding	ENST00000400461	FER1L4	GENCODE	4005	chr20	-	34146506	34187594	TTACTGAGTTAATTAGGCCTAGACCACAGTAACCTCCATTCCCACCCAGAGTCTCTGATT	intergenic							4.834	6.13977
ASHGA5P045906	5.9146e-07	0.000175931	2.46948	down	noncoding	NR_024366	FAM225A	RefSeq	5802	chr9	+	115875175	115882126	GTGAACACACACCTCCTACATGTTTATATTATTGTGTGCATAGATACTACCATTGTAACA	intergenic							4.48591	5.79012
ASHGA5P028831	0.026065	0.0707522	2.46764	down	noncoding	ENST00000413926	LINC00372	GENCODE	606	chr13	+	51657936	51659535	AAAGAGCTCTGCATCCCACTCCATATCTTCTCCTGAGAAGTTGAAAAGGATCTGTCTGGA	intergenic							7.42173	8.72485
ASHGA5P032951	0.00339438	0.0218725	2.46648	down	noncoding	ENST00000582896	RP11-746M1.8	pseudogene	145	chr17	+	20887214	20887359	GCCGCCGCCCGACCGCCGGGAGGATGGAGTTCAGCGGGCAGCGGAGCTGTCTCAGTCTTT								8.25094	9.5534
ASHGA5P028755	0.0228247	0.0651197	2.46437	down	noncoding	ENST00000414407	LINC00398	GENCODE	906	chr13	+	31377342	31384782	GACCCTTCCCACCATTTCAACATCATTAGGAATTTAACAGGCTTTTGCAAGAAGGCCCAG	intergenic							5.68896	6.99018
ASHGA5P050917	0.022068	0.0638296	2.4618	down	noncoding	ENST00000441231	PLCB1-IT1	GENCODE	373	chr20	+	8229350	8230389	ACCAAATACCCAAAAGATCTGCTTCAACCTTCCCCAGTTAATCTTTTGCCAGAAGATTCA	intron sense-overlapping	NM_015192	PLCB1	1-phosphatidylinositol 4,5-bisphosphate phosphodiesterase beta-1 isoform a	+	8113295	8865547	4.84547	6.14518
ASHGA5P050917	0.022068	0.0638296	2.4618	down	noncoding	ENST00000441231	PLCB1-IT1	GENCODE	373	chr20	+	8229350	8230389	ACCAAATACCCAAAAGATCTGCTTCAACCTTCCCCAGTTAATCTTTTGCCAGAAGATTCA	intron sense-overlapping	NM_182734	PLCB1	1-phosphatidylinositol 4,5-bisphosphate phosphodiesterase beta-1 isoform b	+	8113295	8865547	4.84547	6.14518
ASHGA5P047368	0.0168507	0.0554464	2.46124	down	noncoding	NR_024497	LOC399744	RefSeq	5270	chr10	+	38717073	38741081	ATTACTGGCTCAATGTAATGGCTCCATCTCAGGAACAGCCAATGAAAGAGATGCACAGGA	intergenic							3.3222	4.62158
ASHGA5P026800	0.0365172	0.0850557	2.4591	down	noncoding	ENST00000424313	AP000997.1	GENCODE	479	chr11	+	115498782	115500461	GCTTCCCTTGCTCCTGAACTTGAGCCTCTGATTCCCTCTCCTGTTGGAGGCTTTAACACG	intergenic							8.7368	10.0349
ASHGA5P015159	0.0187947	0.0588475	2.45908	down	noncoding	ENST00000417384	RP11-30O15.1	GENCODE	589	chr3	+	187514042	187522925	GAGAACAAAGGCATCCATCCCAAAGATTTCCCAAAGATGTCCTCAGTAACCAAAGTGATT	intergenic							3.74126	5.03938
ASHGA5P020892	0.0465239	0.0983129	2.45884	down	noncoding	ENST00000523682	RP11-267L5.1	GENCODE	836	chr8	+	115294297	115308042	GCCCCCTAGACCATCACGGACGCCGAGCTTCAGGAAACGACGAGGCTGAATCCTGTTGGA	intergenic							6.88558	8.18356
ASHGA5P049019	0.0349809	0.0828151	2.45876	down	noncoding	ENST00000562807	ERVK13-1	GENCODE	594	chr16	-	2713082	2721462	TGTGAGAAGCCCCCTTCCCAGTGAACTTTCCCTTGTGTGCCCGCGTGGACAGCCAACAGG	intergenic							10.4315	11.7294
ASHGA5P018473	0.040075	0.0896704	2.45875	down	noncoding	ENST00000453988	RP5-836N10.1	GENCODE	706	chr1	-	112147001	112151345	CGACCCCGTCTGGGAGGGTGGCTGTCAATAGATTGGCCCAAAAGGAAGAACAAGGAAAAG	intronic antisense	ENST00000356415	RAP1A	RAP1A, member of RAS oncogene family [Source:HGNC Symbol;Acc:9855]	+	112084839	112255735	4.52876	5.82668
ASHGA5P035248	0.000815198	0.0106579	2.4578	down	noncoding	ENST00000416673	RPL23AP7	GENCODE	2078	chr2	-	114368078	114384617	ATTGAGAGACACACATAGTGGTCAAACACGATTTCAGCCATGAATCAGGCATAAATATTC	bidirectional	NM_007082	RABL2A	rab-like protein 2A	+	114384816	114400975	4.59771	5.89508
ASHGA5P035248	0.000815198	0.0106579	2.4578	down	noncoding	ENST00000416673	RPL23AP7	GENCODE	2078	chr2	-	114368078	114384617	ATTGAGAGACACACATAGTGGTCAAACACGATTTCAGCCATGAATCAGGCATAAATATTC	bidirectional	NM_013412	RABL2A	rab-like protein 2A	+	114384816	114400975	4.59771	5.89508
ASHGA5P023612	0.000154035	0.00436006	2.45502	down	noncoding	HMlincRNA1065+	HMlincRNA1065	LincRNAs identified by Khalil et al	11540	chr1	+	87222750	87234290	AACCATATGTGACTTGTGTGCTTCCCCTTTCCAGCTCAGTAATACAAAGAAGAAGCGTTC	intergenic							5.44327	6.73901
ASHGA5P057971	0.00883558	0.0374244	2.45116	down	noncoding	TCONS_00024491	XLOC_011811	LincRNAs identified by Cabili et al	242	chr16	+	86193596	86200988	TATTCTCATGTTCCTGGTTTCTTCCACTCAACATTCAGCCAGATGCAGTGTCGTGAGAAC	intergenic							3.31752	4.61099
ASHGA5P031346	0.0189444	0.0590752	2.44999	down	noncoding	ENST00000562565	RP11-543N12.1	GENCODE	563	chr16	-	83416620	83431775	AAATCTGATTCTCCTCCTTCAATTACTGCTTATCTTCAGAAAAGCCATGCACCTCACGAA	intronic antisense	NM_001220488	CDH13	cadherin-13 isoform 2	+	82660398	83830215	4.50816	5.80094
ASHGA5P031346	0.0189444	0.0590752	2.44999	down	noncoding	ENST00000562565	RP11-543N12.1	GENCODE	563	chr16	-	83416620	83431775	AAATCTGATTCTCCTCCTTCAATTACTGCTTATCTTCAGAAAAGCCATGCACCTCACGAA	intronic antisense	NM_001220489	CDH13	cadherin-13 isoform 3 precursor	+	82660398	83830215	4.50816	5.80094
ASHGA5P031346	0.0189444	0.0590752	2.44999	down	noncoding	ENST00000562565	RP11-543N12.1	GENCODE	563	chr16	-	83416620	83431775	AAATCTGATTCTCCTCCTTCAATTACTGCTTATCTTCAGAAAAGCCATGCACCTCACGAA	intronic antisense	NM_001220490	CDH13	cadherin-13 isoform 4	+	82660398	83830215	4.50816	5.80094
ASHGA5P031346	0.0189444	0.0590752	2.44999	down	noncoding	ENST00000562565	RP11-543N12.1	GENCODE	563	chr16	-	83416620	83431775	AAATCTGATTCTCCTCCTTCAATTACTGCTTATCTTCAGAAAAGCCATGCACCTCACGAA	intronic antisense	NM_001257	CDH13	cadherin-13 isoform 1 preproprotein	+	82660398	83830215	4.50816	5.80094
ASHGA5P033719	0.0052909	0.0282844	2.44862	down	noncoding	TCONS_00028355	XLOC_013708	LincRNAs identified by Cabili et al	1679	chr20	-	25730058	25732440	TTAATAACAAGTCAGTTGAAAGCCCTGCCTTGCCAGTTTCCACAGTCACAATGTGGCCTT	intergenic							4.35678	5.64875
ASHGA5P021378	0.000977295	0.0115831	2.4437	down	noncoding	NR_047589	TMEM218	RefSeq	3720	chr11	-	124964265	124981604	CCATTGCCTGGTTCTCTGTCATTTTTTTATTCTTCGGTGCTGTGATCATCACATCAGTTC	exon sense-overlapping	NM_001080546	TMEM218	transmembrane protein 218 isoform 2	-	124964265	124981604	4.31639	5.60546
ASHGA5P021378	0.000977295	0.0115831	2.4437	down	noncoding	NR_047589	TMEM218	RefSeq	3720	chr11	-	124964265	124981604	CCATTGCCTGGTTCTCTGTCATTTTTTTATTCTTCGGTGCTGTGATCATCACATCAGTTC	exon sense-overlapping	NM_001258238	TMEM218	transmembrane protein 218 isoform 2	-	124964265	124981659	4.31639	5.60546
ASHGA5P021378	0.000977295	0.0115831	2.4437	down	noncoding	NR_047589	TMEM218	RefSeq	3720	chr11	-	124964265	124981604	CCATTGCCTGGTTCTCTGTCATTTTTTTATTCTTCGGTGCTGTGATCATCACATCAGTTC	exon sense-overlapping	NM_001258239	TMEM218	transmembrane protein 218 isoform 1	-	124964265	124981659	4.31639	5.60546
ASHGA5P021378	0.000977295	0.0115831	2.4437	down	noncoding	NR_047589	TMEM218	RefSeq	3720	chr11	-	124964265	124981604	CCATTGCCTGGTTCTCTGTCATTTTTTTATTCTTCGGTGCTGTGATCATCACATCAGTTC	exon sense-overlapping	NM_001258240	TMEM218	transmembrane protein 218 isoform 2	-	124964265	124981659	4.31639	5.60546
ASHGA5P021378	0.000977295	0.0115831	2.4437	down	noncoding	NR_047589	TMEM218	RefSeq	3720	chr11	-	124964265	124981604	CCATTGCCTGGTTCTCTGTCATTTTTTTATTCTTCGGTGCTGTGATCATCACATCAGTTC	exon sense-overlapping	NM_001258241	TMEM218	transmembrane protein 218 isoform 2	-	124964265	124981659	4.31639	5.60546
ASHGA5P021378	0.000977295	0.0115831	2.4437	down	noncoding	NR_047589	TMEM218	RefSeq	3720	chr11	-	124964265	124981604	CCATTGCCTGGTTCTCTGTCATTTTTTTATTCTTCGGTGCTGTGATCATCACATCAGTTC	exon sense-overlapping	NM_001258242	TMEM218	transmembrane protein 218 isoform 1	-	124964265	124981604	4.31639	5.60546
ASHGA5P021378	0.000977295	0.0115831	2.4437	down	noncoding	NR_047589	TMEM218	RefSeq	3720	chr11	-	124964265	124981604	CCATTGCCTGGTTCTCTGTCATTTTTTTATTCTTCGGTGCTGTGATCATCACATCAGTTC	exon sense-overlapping	NM_001258243	TMEM218	transmembrane protein 218 isoform 1	-	124964265	124981604	4.31639	5.60546
ASHGA5P021378	0.000977295	0.0115831	2.4437	down	noncoding	NR_047589	TMEM218	RefSeq	3720	chr11	-	124964265	124981604	CCATTGCCTGGTTCTCTGTCATTTTTTTATTCTTCGGTGCTGTGATCATCACATCAGTTC	exon sense-overlapping	NM_001258244	TMEM218	transmembrane protein 218 isoform 2	-	124964265	124981604	4.31639	5.60546
ASHGA5P021378	0.000977295	0.0115831	2.4437	down	noncoding	NR_047589	TMEM218	RefSeq	3720	chr11	-	124964265	124981604	CCATTGCCTGGTTCTCTGTCATTTTTTTATTCTTCGGTGCTGTGATCATCACATCAGTTC	exon sense-overlapping	NM_001258245	TMEM218	transmembrane protein 218 isoform 2	-	124964265	124981604	4.31639	5.60546
ASHGA5P021378	0.000977295	0.0115831	2.4437	down	noncoding	NR_047589	TMEM218	RefSeq	3720	chr11	-	124964265	124981604	CCATTGCCTGGTTCTCTGTCATTTTTTTATTCTTCGGTGCTGTGATCATCACATCAGTTC	exon sense-overlapping	NM_001258246	TMEM218	transmembrane protein 218 isoform 1	-	124964265	124981604	4.31639	5.60546
ASHGA5P021378	0.000977295	0.0115831	2.4437	down	noncoding	NR_047589	TMEM218	RefSeq	3720	chr11	-	124964265	124981604	CCATTGCCTGGTTCTCTGTCATTTTTTTATTCTTCGGTGCTGTGATCATCACATCAGTTC	exon sense-overlapping	NM_001258247	TMEM218	transmembrane protein 218 isoform 2	-	124964265	124981604	4.31639	5.60546
ASHGA5P028312	0.000284285	0.00599861	2.43968	down	noncoding	ENST00000544667	RP11-465L8.1	GENCODE	548	chr12	+	118327258	118328813	TGCTACATGGTTCATCACTGTCATCCCTCCCTTCAGAAAAATTAAATCATTCAAAGGTCA	intronic antisense	NM_173598	KSR2	kinase suppressor of Ras 2	-	117890816	118406028	7.77536	9.06205
ASHGA5P043722	3.94794e-06	0.000543343	2.43811	down	noncoding	ENST00000567474	RP11-731K22.1	GENCODE	474	chr7	+	73402303	73403096	ATGGGCTTGGGTGGGAGATCAGGCAATAATAAATAATAAAAACAACAAATTTCACACTTG	intergenic							3.52597	4.81173
ASHGA5P048903	0.0248799	0.0689563	2.43504	down	noncoding	TCONS_00024905	XLOC_011826	LincRNAs identified by Cabili et al	2262	chr16	+	88217949	88220293	ACACCCAGACATGGATACACAGGCACACACATATTGGGACACCCACGCATAGACACTCAC	intergenic							4.99382	6.27776
ASHGA5P054325	0.000216075	0.00513511	2.43482	down	noncoding	NR_026778	HNRNPU-AS1	RefSeq	5079	chr1	-	245003939	245010243	GTCCAGAGAAGAGCTAGTTAATTTTAAATTCCCCGAGGTCCTTTTACTGAGATGGAAAAG	natural antisense	NM_198076	COX20	cytochrome c oxidase protein 20 homolog	+	244998638	245008359	2.6853	3.96911
ASHGA5P058201	3.94879e-05	0.00198972	2.43424	down	noncoding	TCONS_00028132	XLOC_013490	LincRNAs identified by Cabili et al	419	chr20	+	23484349	23487749	CCACTCTCAGTGCCATCAACACAGGGTCCCAAGAGTTCTCAGCCACATCAGCTCCAAGAA	intergenic							2.98092	4.26439
ASHGA5P028355	0.0374056	0.0861244	2.43299	down	noncoding	NR_038290	LOC100507091	RefSeq	2191	chr12	+	123565930	123569291	AATTAAAGCAGATTTTCTCTTCCACTCCCCTTCCCCAAAACAAGAATAAATCAGTTCTAC	intronic antisense	NM_020845	PITPNM2	membrane-associated phosphatidylinositol transfer protein 2	-	123468026	123594975	10.184	11.4667
ASHGA5P058234	0.0167649	0.0553224	2.43158	down	noncoding	TCONS_00028410	XLOC_013763	LincRNAs identified by Cabili et al	254	chr20	-	44543294	44544555	AGCACTTCGGGAGGCTGAGGATGAGGAAATTGAAGATCTGAGTGCTTAAGCAAGGGATCA	intergenic							5.54411	6.82601
ASHGA5P034900	0.00487151	0.0268822	2.43021	down	noncoding	ENST00000422415	AC010145.4	GENCODE	517	chr2	-	16137170	16203007	ATGCCTCTCAAGGCTCCTTTTCCTCCTTACAAACAAAATAAAACAAATCCTTCCTATGGA	intergenic							4.56583	5.84691
ASHGA5P052237	0.00202431	0.0166173	2.42811	down	noncoding	ENST00000515466	RP11-159F24.1	GENCODE	557	chr5	-	43575879	43603278	TCCCCGCCCCAGCTTTCTTCCCGCCAGGCCCCCTCCACCCGATCGCCGCGCGCTCTCCGA	natural antisense	NM_012343	NNT	NAD(P) transhydrogenase, mitochondrial	+	43602790	43705668	10.8184	12.0983
ASHGA5P052237	0.00202431	0.0166173	2.42811	down	noncoding	ENST00000515466	RP11-159F24.1	GENCODE	557	chr5	-	43575879	43603278	TCCCCGCCCCAGCTTTCTTCCCGCCAGGCCCCCTCCACCCGATCGCCGCGCGCTCTCCGA	natural antisense	NM_182977	NNT	NAD(P) transhydrogenase, mitochondrial	+	43603228	43705668	10.8184	12.0983
ASHGA5P027363	0.0168081	0.0553921	2.42805	down	noncoding	ENST00000418525	RP11-169K16.4	GENCODE	639	chr1	-	16066545	16076391	TTCAAAGGGTGCTGCTGGAGCTGTCCAAGGGGTGGCCATTCTTCGGGGAATGAGCTGAAA	intronic antisense	NM_001013641	TMEM82	transmembrane protein 82	+	16068916	16074477	4.25192	5.53172
ASHGA5P027363	0.0168081	0.0553921	2.42805	down	noncoding	ENST00000418525	RP11-169K16.4	GENCODE	639	chr1	-	16066545	16076391	TTCAAAGGGTGCTGCTGGAGCTGTCCAAGGGGTGGCCATTCTTCGGGGAATGAGCTGAAA	natural antisense	NM_207348	SLC25A34	solute carrier family 25 member 34	+	16062808	16067884	4.25192	5.53172
ASHGA5P000495	0.0290093	0.0751601	2.42074	down	noncoding	chr7:149967450-150001750-	chr7:149967450-150001750	LincRNAs identified by Khalil et al	34300	chr7	-	150336517	150370817	ATAATTAAGAATTCAGGAGATGTTTAACTTCAAGCTCTCCCTCACTATTTAAACTCCCCA	intergenic							4.76123	6.03668
ASHGA5P030247	0.00666205	0.0319469	2.42052	down	noncoding	ENST00000565547	RP11-326A19.3	GENCODE	450	chr15	-	89630308	89631172	AACCCATTCCCCATTCTGAAGGTGTAGACATCACAGAGTGTGGACAGAAATAGCTTCTCA	intronic antisense	ENST00000569411	ABHD2	abhydrolase domain containing 2 [Source:HGNC Symbol;Acc:18717]	+	89630689	89698621	4.5095	5.78482
ASHGA5P036678	0.00407037	0.0243878	2.41983	down	noncoding	uc002wrh.3	HSPC072	UCSC_knowngene	1951	chr20	-	18768614	18775228	TGTCTTCTTGGATGGGCTCTCCACATCTTCCACCACGAAGTAAAAACAATTCTTGTGGGT	intergenic							3.80833	5.08323
ASHGA5P028752	0.0040831	0.0244324	2.41853	down	noncoding	ENST00000453470	LINC00297	GENCODE	913	chr13	+	30446749	30462542	TGTTTTCTACCTGTATTCCCCTTTAAGCTGTTGTTCACTAGACTCTAAGCCATGTGGTTT	intergenic							3.90736	5.18149
ASHGA5P039518	0.0172196	0.0561113	2.41131	down	noncoding	TCONS_00022431	XLOC_010769	LincRNAs identified by Cabili et al	2083	chr14	+	24164069	24168143	TACATACACACATACCCAGCAACCTTCATATATGTTATCAAAAAGGGAACCCAGACCCGT	intergenic							3.69216	4.96197
ASHGA5P020627	0.0185272	0.0583668	2.41085	down	noncoding	ENST00000517725	RP11-366K18.3	GENCODE	259	chr8	+	67104349	67105532	TGAGTGAGTGAGGGGCTCTTAGATCTTCGGCCACAGACTGAAGGCTGCACTGTCAGCTTC	intergenic							3.99033	5.25988
ASHGA5P031141	0.0074961	0.0339285	2.41073	down	noncoding	ENST00000562945	RP11-488I20.9	GENCODE	2972	chr16	-	34427060	34430032	CCCTCTTCTGATCCTTCATCCTGGTAGCTTATATCCTGTTTTGCTGCATAATAAATAATT	intergenic							4.36774	5.63721
ASHGA5P048209	0.00202557	0.0166173	2.40846	down	noncoding	uc001ody.3	AF113016	UCSC_knowngene	4136	chr11	-	65266957	65271093	ATTGGTTCTGGTCTACGTAAACACCCTCATCTTCTCAAGCTTTACCTTCTAACTTCTGCA	intergenic							6.73365	8.00176
ASHGA5P019037	0.00404453	0.0243437	2.40493	down	noncoding	ENST00000465347	RP11-62G11.2	GENCODE	455	chr3	-	69613256	69620273	TAAAAATCAAATATGCTGATGGAAAGTGAGTGGAACACTTCTCTCTCTCTTTCGATGAAG	intergenic							4.7548	6.02079
ASHGA5P032010	0.0013611	0.0136076	2.40399	down	noncoding	NR_036480	LOC100128881	RefSeq	1753	chr16	+	89778263	89784573	TGGTCACAGTCGGCTCTACCACTGTTACTTACTGCTGAGATAAAATGAGGCAACGGAAAA	natural antisense	NM_004913	C16orf7	uncharacterized protein C16orf7	-	89773540	89787394	3.06344	4.32887
ASHGA5P032674	0.000121608	0.00380488	2.40304	down	noncoding	NR_028337	FLJ45079	RefSeq	4704	chr17	-	75875082	75880169	TCCAGTCAAGTCTCAATCTCAGTCGGTCACTGGTCCATGTATATTTCATGGACATCTACC	exon sense-overlapping	ENST00000374983	AC015804.1		-	75875108	75878659	2.81139	4.07625
ASHGA5P028343	3.09013e-05	0.00170611	2.40113	down	noncoding	ENST00000453128	RP11-159M11.2	GENCODE	705	chr1	-	116556433	116560326	CCCCTTACTAATGTATGCTTTACTTCTGAATTCCATTCTTCACATGCAATTCTTAACAAG	intronic antisense	NM_018420	SLC22A15	solute carrier family 22 member 15	+	116519118	116612675	3.4977	4.76142
ASHGA5P036914	0.00502286	0.027422	2.39308	down	noncoding	TCONS_00025358	XLOC_012177	LincRNAs identified by Cabili et al	1210	chr17	+	33640547	33652439	CAAGAAGCTACCCTCTCCCCACCAGACAGAGCAGGATGAGAGTTCTATAATCCTCAATAG	intergenic							8.36289	9.62176
ASHGA5P017918	0.0123273	0.0460389	2.3919	down	noncoding	ENST00000447119	RP11-790G19.2	GENCODE	613	chr10	-	72976980	72977969	AATACACATTCTCACCCCCCACACACTCCTTAATACATACTCTCACTTGGAGAAGTGAGC	intronic antisense	NM_001244889	UNC5B	netrin receptor UNC5B isoform 2 precursor	+	72972291	73062635	10.562	11.8202
ASHGA5P017918	0.0123273	0.0460389	2.3919	down	noncoding	ENST00000447119	RP11-790G19.2	GENCODE	613	chr10	-	72976980	72977969	AATACACATTCTCACCCCCCACACACTCCTTAATACATACTCTCACTTGGAGAAGTGAGC	intronic antisense	NM_170744	UNC5B	netrin receptor UNC5B isoform 1 precursor	+	72972291	73062635	10.562	11.8202
ASHGA5P029058	0.000164491	0.00452767	2.39115	down	noncoding	ENST00000508469	CTD-2251F13.1	GENCODE	922	chr14	-	30637039	30766249	AAATGGCTTTCTCTTCATTCATTTCTACATCTTCATTCATTCTCCCAGGTCTTGCAATGG	intron sense-overlapping	ENST00000549503	PRKD1	protein kinase D1 [Source:HGNC Symbol;Acc:9407]	-	30133017	30661104	3.11347	4.37118
ASHGA5P052330	0.0282446	0.0740231	2.39049	down	noncoding	NR_015369	FLJ42709	RefSeq	3380	chr5	-	92745064	92906499	CTTCCTTCAGACAGGGACTGAGAAACGGAAATACTACCATCCTCCAGCCAATCTGTTGGG	intergenic							4.20442	5.46172
ASHGA5P043086	0.00202202	0.0166173	2.38952	down	noncoding	ENST00000419937	RP11-73B2.6	GENCODE	423	chr7	-	63385164	63386124	TAATAGGGCCTTGGTATGGTTTTATGTGTATTTTCTTTTTGAAGTGTGCTCACCTTTTGA	intergenic							4.0921	5.34882
ASHGA5P007456	0.0150697	0.0520774	2.38915	down	noncoding	uc002tjq.4	LOC654433	UCSC_knowngene	2328	chr2	+	113993106	114024580	ATGGCGAAGGGCCAGGGCCCCACACCTTCCGCCTGACAGCCAGCCAAGCTCTTCAGTCCC	intronic antisense	NM_013953	PAX8	paired box protein Pax-8 isoform PAX8D	-	113973573	114036498	4.69232	5.94882
ASHGA5P007456	0.0150697	0.0520774	2.38915	down	noncoding	uc002tjq.4	LOC654433	UCSC_knowngene	2328	chr2	+	113993106	114024580	ATGGCGAAGGGCCAGGGCCCCACACCTTCCGCCTGACAGCCAGCCAAGCTCTTCAGTCCC	intronic antisense	NM_013992	PAX8	paired box protein Pax-8 isoform PAX8E	-	113973573	114036498	4.69232	5.94882
ASHGA5P007456	0.0150697	0.0520774	2.38915	down	noncoding	uc002tjq.4	LOC654433	UCSC_knowngene	2328	chr2	+	113993106	114024580	ATGGCGAAGGGCCAGGGCCCCACACCTTCCGCCTGACAGCCAGCCAAGCTCTTCAGTCCC	natural antisense	NM_003466	PAX8	paired box protein Pax-8 isoform PAX8A	-	113973573	114036498	4.69232	5.94882
ASHGA5P007456	0.0150697	0.0520774	2.38915	down	noncoding	uc002tjq.4	LOC654433	UCSC_knowngene	2328	chr2	+	113993106	114024580	ATGGCGAAGGGCCAGGGCCCCACACCTTCCGCCTGACAGCCAGCCAAGCTCTTCAGTCCC	natural antisense	NM_013952	PAX8	paired box protein Pax-8 isoform PAX8C	-	113973573	114036498	4.69232	5.94882
ASHGA5P038066	0.00198034	0.0164511	2.38857	down	noncoding	TCONS_00024360	XLOC_011682	LincRNAs identified by Cabili et al	349	chr16	+	27389362	27389821	TAGGGGCCATAAAAAATGGTTGTTTTGAGCTGGGTACAGTGGCTCACTCCTGTAATTCCA	intergenic							4.09351	5.34966
ASHGA5P048454	0.000884545	0.0109817	2.38732	down	noncoding	ENST00000544925	RP11-64D24.2	GENCODE	393	chr11	-	114081337	114227293	ATTTTGCTCTTGCTCTGGGAAGTTTACCAAGATTCTAAACTAGCCCCGGCAAACAGGGAA	intronic antisense	NM_001018011	ZBTB16	zinc finger and BTB domain-containing protein 16	+	113931287	114121397	3.12993	4.38532
ASHGA5P048454	0.000884545	0.0109817	2.38732	down	noncoding	ENST00000544925	RP11-64D24.2	GENCODE	393	chr11	-	114081337	114227293	ATTTTGCTCTTGCTCTGGGAAGTTTACCAAGATTCTAAACTAGCCCCGGCAAACAGGGAA	intronic antisense	NM_006006	ZBTB16	zinc finger and BTB domain-containing protein 16	+	113930430	114121397	3.12993	4.38532
ASHGA5P048454	0.000884545	0.0109817	2.38732	down	noncoding	ENST00000544925	RP11-64D24.2	GENCODE	393	chr11	-	114081337	114227293	ATTTTGCTCTTGCTCTGGGAAGTTTACCAAGATTCTAAACTAGCCCCGGCAAACAGGGAA	intronic antisense	NM_006169	NNMT	nicotinamide N-methyltransferase	+	114166534	114183238	3.12993	4.38532
ASHGA5P040177	0.0168996	0.0554954	2.38623	down	noncoding	ENST00000421640	BX004987.5	GENCODE	736	chr1	+	143391567	143394444	CCCTGGAGCTCTCATTTTCAAGAGATATCCATTTGCTAACTTTATTCAATAAATGTGACT	intergenic							3.55476	4.8095
ASHGA5P044545	0.0331969	0.0806611	2.38544	down	noncoding	ENST00000429151	AF230666.2	GENCODE	773	chr8	-	133850374	133856543	CCAGGAAAAAGTCACACCTCTTCCCTTCCAGTAGGATAGTAATTTTGTTGATAAATATAT	natural antisense	NM_016018	PHF20L1	PHD finger protein 20-like protein 1 isoform 1	+	133787603	133861052	5.05526	6.30952
ASHGA5P045237	0.0384959	0.0877772	2.38371	down	noncoding	ENST00000441245	RP5-857K21.4	GENCODE	629	chr1	-	637315	655530	CCGATGCCTCATTTTCCTCATCAGTTGAAAGGAATGAATGAAAGATTTGTGTTTTTCATA	intergenic							3.47161	4.72482
ASHGA5P040084	0.00184868	0.015784	2.38357	down	noncoding	ENST00000506451	RP11-33B1.1	GENCODE	425	chr4	+	120415619	120419182	GAAGTGACAAAGTTCTGTCTTGCCTGTTCTCTCACAAAACAGCATATCAATTAAATAATG	natural antisense	NM_001083	PDE5A	cGMP-specific 3',5'-cyclic phosphodiesterase isoform 1	-	120415549	120549981	3.75489	5.00801
ASHGA5P040084	0.00184868	0.015784	2.38357	down	noncoding	ENST00000506451	RP11-33B1.1	GENCODE	425	chr4	+	120415619	120419182	GAAGTGACAAAGTTCTGTCTTGCCTGTTCTCTCACAAAACAGCATATCAATTAAATAATG	natural antisense	NM_033430	PDE5A	cGMP-specific 3',5'-cyclic phosphodiesterase isoform 2	-	120415549	120548442	3.75489	5.00801
ASHGA5P040084	0.00184868	0.015784	2.38357	down	noncoding	ENST00000506451	RP11-33B1.1	GENCODE	425	chr4	+	120415619	120419182	GAAGTGACAAAGTTCTGTCTTGCCTGTTCTCTCACAAAACAGCATATCAATTAAATAATG	natural antisense	NM_033437	PDE5A	cGMP-specific 3',5'-cyclic phosphodiesterase isoform 3	-	120415549	120549239	3.75489	5.00801
ASHGA5P040882	0.00261614	0.0189055	2.38207	down	noncoding	ENST00000521251	CTC-209H22.3	GENCODE	496	chr5	-	172571164	172572042	CGCTTCACAGTGGTCTCTTTCCATCTTCCTTCTGTCAGGCATTCTAATAACTATATATTT	natural antisense	NM_001205	BNIP1	vesicle transport protein SEC20 isoform BNIP1	+	172571444	172591390	4.31539	5.5676
ASHGA5P040882	0.00261614	0.0189055	2.38207	down	noncoding	ENST00000521251	CTC-209H22.3	GENCODE	496	chr5	-	172571164	172572042	CGCTTCACAGTGGTCTCTTTCCATCTTCCTTCTGTCAGGCATTCTAATAACTATATATTT	natural antisense	NM_013978	BNIP1	vesicle transport protein SEC20 isoform BNIP1-a	+	172571444	172591390	4.31539	5.5676
ASHGA5P040882	0.00261614	0.0189055	2.38207	down	noncoding	ENST00000521251	CTC-209H22.3	GENCODE	496	chr5	-	172571164	172572042	CGCTTCACAGTGGTCTCTTTCCATCTTCCTTCTGTCAGGCATTCTAATAACTATATATTT	natural antisense	NM_013979	BNIP1	vesicle transport protein SEC20 isoform BNIP1-b	+	172571444	172591390	4.31539	5.5676
ASHGA5P040882	0.00261614	0.0189055	2.38207	down	noncoding	ENST00000521251	CTC-209H22.3	GENCODE	496	chr5	-	172571164	172572042	CGCTTCACAGTGGTCTCTTTCCATCTTCCTTCTGTCAGGCATTCTAATAACTATATATTT	natural antisense	NM_013980	BNIP1	vesicle transport protein SEC20 isoform BNIP1-c	+	172571444	172591390	4.31539	5.5676
ASHGA5P056795	0.018658	0.0585222	2.38083	down	noncoding	TCONS_00008726	XLOC_004234	LincRNAs identified by Cabili et al	301	chr4	-	191028241	191030033	ACCAACGGTGTCTACAGGTGTATCCAGCAGCTCTGGAGAGACAGTGACCAGTGAGAATGG	intergenic							2.85386	4.10532
ASHGA5P040492	0.0026835	0.0191078	2.38042	down	noncoding	uc011crn.1	LOC100170939	UCSC_knowngene	448	chr5	-	69517757	69812309	AAGACATCACAATCCCATTATTCAGAGCGCGTATGGAGTGGAAACGCTTGTAGGGTTTCA	intergenic							3.89393	5.14514
ASHGA5P055052	0.026495	0.0713523	2.37684	down	noncoding	ENST00000528156	RP11-113K21.5	GENCODE	658	chr11	+	82783384	82784642	ACGCTTCCTTCTCCATTTTTTAGCTAAGAGATTGAGAGAGTCGGTTTACTTTTGGGCTTG	bidirectional	NM_014488	RAB30	ras-related protein Rab-30	-	82692477	82782884	3.41454	4.66359
ASHGA5P048615	0.0145246	0.0508277	2.37614	down	noncoding	TCONS_00003565	XLOC_001338	LincRNAs identified by Cabili et al	344	chr2	+	9714395	9715751	ACCCCCCCCAAAAAAGCACCACCTGTCAAGGAGAATGGCATGGCGACATGGCTGAAACAC	intergenic							11.3954	12.644
ASHGA5P048453	0.0184122	0.0582732	2.37595	down	noncoding	ENST00000543486	RP11-667M19.2	GENCODE	586	chr11	-	113641114	113642413	CTCATAAGCAAGCCAAAATACTGTCTTCATATCTGTTTTTCTTGCAAACATGTATCATCC	intron sense-overlapping	NM_004724	ZW10	centromere/kinetochore protein zw10 homolog	-	113603904	113644485	4.80901	6.05751
ASHGA5P049713	0.00597132	0.0300387	2.37367	down	noncoding	ENST00000573341	RP11-156P1.3	GENCODE	647	chr17	-	45133974	45177614	CCCAGCTCCCACTTGCAGACCTGGGCCGCGGGCTGCCGGCCGAGTGGCCGGGGGGCCTGG	intergenic							6.86007	8.10718
ASHGA5P042349	0.00245644	0.018254	2.36789	down	noncoding	ENST00000442150	MDC1-AS1	GENCODE	738	chr6	+	30670843	30680961	TTGTATCATTGTCCCTCTCCTTCACTAAAGGCTGATCCTTTTCAAGCTGGATTTCAGTTA	natural antisense	NM_014641	MDC1	mediator of DNA damage checkpoint protein 1	-	30667583	30685458	5.08599	6.32959
ASHGA5P027761	0.0246872	0.0685873	2.3641	down	noncoding	ENST00000544842	RP11-319E16.2	GENCODE	3387	chr12	+	5425126	5428513	AAGTTTCTTTTGTGTCCTTTATATCCCCCTAACAACAGGGAAGTTTTATCAGTAAATGCC	intergenic							4.58194	5.82323
ASHGA5P022356	0.0269101	0.0720075	2.36163	down	noncoding	ENST00000555146	RP11-110A12.2	GENCODE	532	chr12	-	55828520	55873256	CGCGACCCCGTCTGGGAGTTGTTCATGTATTCTAGAGGAAAAGAAAGGAATATCATTATA	intron sense-overlapping	NM_001005499	OR6C70	olfactory receptor 6C70	-	55862983	55863922	4.86524	6.10503
ASHGA5P022356	0.0269101	0.0720075	2.36163	down	noncoding	ENST00000555146	RP11-110A12.2	GENCODE	532	chr12	-	55828520	55873256	CGCGACCCCGTCTGGGAGTTGTTCATGTATTCTAGAGGAAAAGAAAGGAATATCATTATA	intronic antisense	NM_054105	OR6C2	olfactory receptor 6C2	+	55845997	55846936	4.86524	6.10503
ASHGA5P058551	0.0258112	0.0704318	2.36117	down	noncoding	uc010gqq.3	TPTEP1	UCSC_knowngene	1055	chr22	+	17082800	17096000	CCCCTGGACCATCACAGAAGCCGAGCTTCGGGTAACTCTCACAGTGGAGGAAGGCAGGAA	intergenic							5.43374	6.67324
ASHGA5P055773	0.000384031	0.00696518	2.35632	down	noncoding	ENST00000522845	TPT1-AS1	GENCODE	517	chr13	+	45940521	45952767	TTGGAATCCCTCTCTGCTTTGCCTGGCTCATTCCATGTCAATTTCAGATCTTCACTTCAG	intergenic							4.74829	5.98482
ASHGA5P050231	0.00416225	0.024659	2.3552	down	noncoding	ENST00000432537	LINC00466	GENCODE	485	chr1	-	63624706	63626081	TTCAAAGTATTCATTTAGCTGTTCCTCTCCTTCATCATTCCATTTAACATTCTCTTTCTC	intergenic							4.15362	5.38946
ASHGA5P033485	0.00622368	0.0307878	2.35408	down	noncoding	ENST00000578800	RP13-270P17.1	GENCODE	1035	chr18	-	3255433	3261820	GGTTTTGTTCTAGATCGTGTTTGTGGCTGTGTTCTTCAGGATATTTTCCCTCACCTTGAG	natural antisense	NM_006471	MYL12A	myosin regulatory light chain 12A	+	3247527	3256234	3.70608	4.94125
ASHGA5P038696	0.00780734	0.0348416	2.35059	down	noncoding	ENST00000448015	RP11-460I13.2	GENCODE	491	chr1	-	28265385	28286704	AAATGATCACAGTGCACTATATTCTGCCACCACCTACCAGCATGGCCTTGGAGATATATA	natural antisense	NM_001009568	SMPDL3B	acid sphingomyelinase-like phosphodiesterase 3b isoform 2 precursor	+	28261503	28282991	4.53713	5.77015
ASHGA5P038696	0.00780734	0.0348416	2.35059	down	noncoding	ENST00000448015	RP11-460I13.2	GENCODE	491	chr1	-	28265385	28286704	AAATGATCACAGTGCACTATATTCTGCCACCACCTACCAGCATGGCCTTGGAGATATATA	natural antisense	NM_014474	SMPDL3B	acid sphingomyelinase-like phosphodiesterase 3b isoform 1 precursor	+	28261503	28285663	4.53713	5.77015
ASHGA5P038696	0.00780734	0.0348416	2.35059	down	noncoding	ENST00000448015	RP11-460I13.2	GENCODE	491	chr1	-	28265385	28286704	AAATGATCACAGTGCACTATATTCTGCCACCACCTACCAGCATGGCCTTGGAGATATATA	natural antisense	NM_018053	XKR8	XK-related protein 8	+	28286503	28294604	4.53713	5.77015
ASHGA5P033991	0.00167257	0.015076	2.34928	down	noncoding	TCONS_00004031	XLOC_001869	LincRNAs identified by Cabili et al	213	chr2	+	220603492	220607703	AATGGGTCAGAGTGTTGTGAGGAGATTGCCGGACTCCTGACGGGGATGCTGCCGTGTTTT	intergenic							3.45209	4.68431
ASHGA5P029640	0.0256528	0.0701536	2.3492	down	noncoding	ENST00000561794	RP6-91H8.2	GENCODE	651	chr14	+	71648172	71648823	CTTCTGCTAACCCCTAAAAGGAATTTACATTCTGCTCATTTCACTTCCCATTATATTGTA	intergenic							7.13828	8.37045
ASHGA5P022350	0.0183228	0.0581107	2.34778	down	noncoding	ENST00000555016	RP11-203M5.6	GENCODE	354	chr14	+	20906827	20908933	ATCAAGGCTGGCTCCTGTATGATTCAACGTGCTTCCGAAAATAGGACTGACATGGGTGTG	intergenic							4.33648	5.56778
ASHGA5P045725	0.000299981	0.00616063	2.34716	down	noncoding	ENST00000440883	RP11-95K23.3	GENCODE	1988	chr9	+	41313944	41323179	GTTTTCTATATGAGTCCTCTCTGTGCATCTTAATAAATCACTTCCCGAGTCACTCCTCAA	natural antisense	NM_001113541	FAM75A5	protein FAM75A5	-	41321106	41327364	3.61653	4.84745
ASHGA5P045725	0.000299981	0.00616063	2.34716	down	noncoding	ENST00000440883	RP11-95K23.3	GENCODE	1988	chr9	+	41313944	41323179	GTTTTCTATATGAGTCCTCTCTGTGCATCTTAATAAATCACTTCCCGAGTCACTCCTCAA	natural antisense	NM_001242613	FAM75A4	protein FAM75A4	-	41321106	41327397	3.61653	4.84745
ASHGA5P045725	0.000299981	0.00616063	2.34716	down	noncoding	ENST00000440883	RP11-95K23.3	GENCODE	1988	chr9	+	41313944	41323179	GTTTTCTATATGAGTCCTCTCTGTGCATCTTAATAAATCACTTCCCGAGTCACTCCTCAA	natural antisense	NM_015667	FAM75A7	protein FAM75A7	-	41321109	41327364	3.61653	4.84745
ASHGA5P019282	0.0200345	0.0608796	2.34631	down	noncoding	ENST00000476426	RP11-163E9.2	pseudogene	537	chr7	+	102004614	102016765	CCCCAGGAGGGTCTATCAGCCACAGTCTCTGCAAGTTTCCAAGAGCAGCAGAAAATGAAC								4.27141	5.50181
ASHGA5P055444	0.00670752	0.0320487	2.34121	down	noncoding	NR_026656	LOC400043	RefSeq	1411	chr12	+	54519854	54526626	AGGGGGGGCTGTGGCGTGGGGGCTGAGGAGGGGCTAAGGCGGGAGGGGCGCCTCATCCCT	intergenic							6.30881	7.53607
ASHGA5P026538	0.00475572	0.026465	2.34086	down	noncoding	ENST00000534065	RP11-867G23.13	GENCODE	544	chr11	+	66080323	66086708	GGGCTGATACCGCTGGAGTATGCAGTTCGCCGCCGCGCCCGAATGAGGCGGGGCCTGCGA	intronic antisense	NM_020404	CD248	endosialin precursor	-	66081957	66084515	4.38459	5.61163
ASHGA5P051233	0.00872264	0.0372223	2.33777	down	noncoding	ENST00000479693	PI4KAP2	GENCODE	1906	chr22	-	21831701	21871809	ATGGCGCTGGGCGGGCGGCTGTGAGCGGCGCTCGGGGCGCGCTAGGCGGGGAGCCGAGCC	intergenic							3.82004	5.04517
ASHGA5P058249	0.00321118	0.0212565	2.33692	down	noncoding	TCONS_00028561	XLOC_013552	LincRNAs identified by Cabili et al	3706	chr20	+	47099590	47104748	AGAGCAGCATTGGCTCCTCCCCAGGTCTCCAGCTCCACCATCATCAAACTTGAATGGCAG	intergenic							7.58831	8.81292
ASHGA5P019654	0.0322705	0.0794781	2.33688	down	noncoding	ENST00000498917	RP11-453E17.1	GENCODE	1445	chr4	+	68566997	68588223	AGTCTTAACGAAATCCTGGCTGACATTGACTTCTCCACTGCAACCATCGAGTTCATTGTC	bidirectional	NM_018227	UBA6	ubiquitin-like modifier-activating enzyme 6	-	68481478	68566889	3.08091	4.30549
ASHGA5P029128	0.00591628	0.029914	2.33462	down	noncoding	ENST00000557625	FRMD6-AS2	GENCODE	581	chr14	-	52013346	52066638	CTCACCCTCCAAAATACTTACAGATGTGTCTCCTCTTTTTTGTAAAATAAATGCTCTTCT	intronic antisense	NM_001042481	FRMD6	FERM domain-containing protein 6 isoform 1	+	51955838	52197444	4.45713	5.68032
ASHGA5P056701	0.000465381	0.00783729	2.33441	down	noncoding	TCONS_00007948	XLOC_003411	LincRNAs identified by Cabili et al	663	chr4	+	582205	611867	AAAGGCATCTGGGCTTTTTCCCGTCGGTCAGCGGCAAAGGCATCTGGGCTTTTTCCTGTC	intergenic							3.8774	5.10046
ASHGA5P051068	0.0119185	0.0450044	2.32919	down	noncoding	ENST00000358393	LINC00176	GENCODE	1466	chr20	+	62669492	62671131	CCCTCCCCAGGAGCACAGTATCCTCCTGTCCATCTCGTCCCTGGGTCGGACCCTGCGCGG	intronic antisense	ENST00000217130	ZNF512B	zinc finger protein 512B [Source:HGNC Symbol;Acc:29212]	-	62588054	62669938	7.47856	8.69839
ASHGA5P051068	0.0119185	0.0450044	2.32919	down	noncoding	ENST00000358393	LINC00176	GENCODE	1466	chr20	+	62669492	62671131	CCCTCCCCAGGAGCACAGTATCCTCCTGTCCATCTCGTCCCTGGGTCGGACCCTGCGCGG	intronic antisense	ENST00000450537	ZNF512B	zinc finger protein 512B [Source:HGNC Symbol;Acc:29212]	-	62588054	62680113	7.47856	8.69839
ASHGA5P018548	0.0029071	0.0201249	2.32238	down	noncoding	ENST00000454861	BX571672.1	GENCODE	1230	chr1	+	143119060	143158077	GGGTGTTTCCAAGAGCAACAAGAAACGAATAAATCTCTGGTGACTTTTTGAAAAAATAGT	intergenic							3.96513	5.18074
ASHGA5P058579	0.011441	0.0439023	2.32059	down	noncoding	uc010mpn.1	PCA3	UCSC_knowngene	3600	chr9	+	79379353	79402465	GATGATACAGAGCCCCTTTAAATATCCACACACACAGGAAGCACAAAAGGAAGCACAGAG	intronic antisense	NM_015225	PRUNE2	protein prune homolog 2	-	79226291	79521003	4.83691	6.05141
ASHGA5P032334	7.5428e-05	0.00293469	2.32054	down	noncoding	BX101441		LincRNAs identified by Khalil et al	712	chr10	+	120374728	120375440	GCAGAGACTCAAAGATTGGCTTCTAATATTCTTCCTATCCTCCCTTAAGAGCCCAGCTGA	intergenic							4.34227	5.55673
ASHGA5P050644	0.000739871	0.0100773	2.31822	down	noncoding	NR_048559	TSN	RefSeq	3325	chr2	+	122513120	122525428	CATCCGAGAGGCGAGCCCCCTCCCTTCCCCATTCCCTTTGCCTTTCCATGCCTAGTTGGG	exon sense-overlapping	NM_001261401	TSN	translin isoform 2	+	122513120	122525428	11.5245	12.7375
ASHGA5P050644	0.000739871	0.0100773	2.31822	down	noncoding	NR_048559	TSN	RefSeq	3325	chr2	+	122513120	122525428	CATCCGAGAGGCGAGCCCCCTCCCTTCCCCATTCCCTTTGCCTTTCCATGCCTAGTTGGG	exon sense-overlapping	NM_004622	TSN	translin isoform 1	+	122513120	122525428	11.5245	12.7375
ASHGA5P045082	0.000860847	0.010894	2.31726	down	noncoding	TCONS_00002048	XLOC_000232	LincRNAs identified by Cabili et al	803	chr1	+	63662011	63664798	GAAACAATTGGAGATCTGAAGCTTCAAAACTCCTACCAACCACCATCTCCTTCGTGAAGC	intergenic							3.7063	4.91872
ASHGA5P000112	0.0316518	0.0787194	2.31475	down	noncoding	BF986711		LincRNAs identified by Khalil et al	245	chr2	+	3184560	3184961	ATTCCAGCACCGACACGGGGACGCTCACTATTCCAGCACCGACACGGGGACGCTCACTAT	intergenic							5.61727	6.82812
ASHGA5P038054	0.00473478	0.0264282	2.3146	down	noncoding	uc003bij.3	BC039485	UCSC_knowngene	1170	chr22	+	48027451	48038545	TCCTGCTGCCTCGCCCGCTTTCTCTCGGAAACGTGAAGTGTGGCCTCAGCTGAAAGTGAG	intergenic							5.88137	7.09213
ASHGA5P019698	0.0198785	0.0605348	2.3145	down	noncoding	ENST00000500695	RP11-637A17.2	GENCODE	1733	chr12	-	69068150	69080639	GTTTTGGGCTCACACCATTGATACATTTGATCCTTAAGGCAAGCCCACCCCGCCTCACTC	natural antisense	ENST00000229179	NUP107	nucleoporin 107kDa [Source:HGNC Symbol;Acc:29914]	+	69080513	69136785	6.76759	7.97829
ASHGA5P032321	0.00435015	0.025244	2.31449	down	noncoding	ENST00000581946	RP11-354P11.3	GENCODE	546	chr17	-	28449446	28453136	CCCCAACCATCTCTCCCACCTTGAACAAAATGATAATTATTTCTAACTTATTCTGACAAT	intronic antisense	NM_001261467	NSRP1	nuclear speckle splicing regulatory protein 1 isoform 2	+	28443824	28513493	5.6957	6.9064
ASHGA5P032321	0.00435015	0.025244	2.31449	down	noncoding	ENST00000581946	RP11-354P11.3	GENCODE	546	chr17	-	28449446	28453136	CCCCAACCATCTCTCCCACCTTGAACAAAATGATAATTATTTCTAACTTATTCTGACAAT	intronic antisense	NM_032141	NSRP1	nuclear speckle splicing regulatory protein 1 isoform 1	+	28443824	28513493	5.6957	6.9064
ASHGA5P040615	0.000318646	0.00639655	2.31128	down	noncoding	ENST00000511981	AC010468.2	GENCODE	438	chr5	-	110601506	110605787	CTTCTGTATCTCCACATGTCAAGGTCTTGGTGATTATTAAAGCCCAAGAAAAAGTAAATC	intronic antisense	NM_001744	CAMK4	calcium/calmodulin-dependent protein kinase type IV	+	110559946	110820748	2.72843	3.93713
ASHGA5P031111	0.0249376	0.0690954	2.31117	down	noncoding	ENST00000562604	RP11-56L13.7	GENCODE	262	chr16	-	32261940	32265743	GCAACTGAGTGACGTGCATAATTCTCTCCAAAGTAAAAGTCCTTTTTGTTTTTTGCAATT	intronic antisense	NM_001243722	LOC729264	TP53-target gene 3 protein-like	+	32264649	32267243	2.89499	4.10361
ASHGA5P017503	0.000326261	0.0064698	2.31031	down	noncoding	ENST00000442432	RP11-326F20.5	GENCODE	843	chr9	+	33166972	33179981	GGTTGGCTAGTTTCCTGTTCTTCCCAACCTGCGCTATGGACTTCATCAGATTTCAGCATC	natural antisense	NM_001497	B4GALT1	beta-1,4-galactosyltransferase 1	-	33110638	33167356	3.55283	4.76091
ASHGA5P031719	0.0404149	0.0901247	2.30965	down	noncoding	ENST00000565523	RP11-244B22.11	GENCODE	703	chr16	+	34378092	34379252	TTGCTCTATCTGCCATAGGAGCCTAGAGGCTTGGTCTGGCTTAAAGTCTTCAACAAAGAA	intergenic							3.56384	4.77152
ASHGA5P000177	0.00592306	0.029914	2.30843	down	noncoding	chr1:56367475-56378825-	chr1:56367475-56378825	LincRNAs identified by Khalil et al	11350	chr1	-	56594887	56606237	CACATTTGCATTTGCTCTCCTTCTCTTACATATACAACTTTATACTTGGTTTAAAGCAGG	intergenic							4.17275	5.37966
ASHGA5P035272	0.0126899	0.0468243	2.30834	down	noncoding	ENST00000441053	AC067960.1	GENCODE	812	chr2	-	121839012	121846302	AATATCCCTTTCCCATTCAGCAACTGTGCAACACCTGACTTCAGAAACAGACGTCTAGAG	intergenic							4.09757	5.30443
ASHGA5P015857	0.0056043	0.0292029	2.30811	down	noncoding	ENST00000456953	RP4-564F22.2	GENCODE	546	chr20	-	37055102	37063976	ACACTGGCGGGCCTTGTGGGCTGTGCTGCACCTCGGACGGCTTCGCACCAGCCAGCGCCC	intergenic							3.75205	4.95876
ASHGA5P031566	0.00296371	0.0202986	2.30712	down	noncoding	ENST00000547549	MIR3179-2	GENCODE	677	chr16	+	16394006	16394683	AGATGCCACCCATCTACATATTCTTTCAGATGCACAATATTTCACTGTGTGAATGAAACA	intergenic							3.99706	5.20316
ASHGA5P027132	0.0239489	0.0671021	2.30623	down	noncoding	uc001rgu.1	LOC100506451	UCSC_knowngene	2084	chr12	-	26097789	26110985	CATTTAGCCACTGTTACTGATAATTTGGATGGAAAAGAAAAATAAATTATATCACCTCTC	bidirectional	NM_001164748	RASSF8	ras association domain-containing protein 8 isoform a	+	26111963	26225807	3.42108	4.62661
ASHGA5P027132	0.0239489	0.0671021	2.30623	down	noncoding	uc001rgu.1	LOC100506451	UCSC_knowngene	2084	chr12	-	26097789	26110985	CATTTAGCCACTGTTACTGATAATTTGGATGGAAAAGAAAAATAAATTATATCACCTCTC	bidirectional	NM_007211	RASSF8	ras association domain-containing protein 8 isoform b	+	26111963	26232825	3.42108	4.62661
ASHGA5P014608	1.01746e-06	0.00024821	2.30515	down	noncoding	ENST00000411775	BX004987.3	GENCODE	356	chr1	+	143361976	143375173	TCAATGGAAAAGGAAAAGGCAATGAAAAGAAGAAGCCAAGAAGAACCCTCAAAACCTTAA	intergenic							3.39851	4.60337
ASHGA5P043396	0.00589113	0.0298763	2.3035	down	noncoding	uc011ktp.2	FAM115C	UCSC_knowngene	2779	chr7	-	143336431	143518083	ATATAGAGAGGAAAATGGCAACTCATCCTCCTCACCACACCACCAGCTCCAGTCTCATGC	intron sense-overlapping	NM_178561	CTAGE6P	putative protein cTAGE-6	-	143452181	143454843	5.97904	7.18286
ASHGA5P043396	0.00589113	0.0298763	2.3035	down	noncoding	uc011ktp.2	FAM115C	UCSC_knowngene	2779	chr7	-	143336431	143518083	ATATAGAGAGGAAAATGGCAACTCATCCTCCTCACCACACCACCAGCTCCAGTCTCATGC	intronic antisense	NM_001130025	FAM115C	protein FAM115C isoform A	+	143318044	143422176	5.97904	7.18286
ASHGA5P043396	0.00589113	0.0298763	2.3035	down	noncoding	uc011ktp.2	FAM115C	UCSC_knowngene	2779	chr7	-	143336431	143518083	ATATAGAGAGGAAAATGGCAACTCATCCTCCTCACCACACCACCAGCTCCAGTCTCATGC	intronic antisense	NM_001130026	FAM115C	protein FAM115C isoform B	+	143412938	143427173	5.97904	7.18286
ASHGA5P043396	0.00589113	0.0298763	2.3035	down	noncoding	uc011ktp.2	FAM115C	UCSC_knowngene	2779	chr7	-	143336431	143518083	ATATAGAGAGGAAAATGGCAACTCATCCTCCTCACCACACCACCAGCTCCAGTCTCATGC	intronic antisense	NM_173678	FAM115C	protein FAM115C isoform A	+	143318541	143422176	5.97904	7.18286
ASHGA5P045489	0.000213956	0.00511826	2.30226	down	noncoding	ENST00000440148	RP11-278H7.3	GENCODE	567	chr1	+	244270666	244272313	GTCACAGACAAACCCCAGAAGTCTTGCTCTCAGAATAAATGTGAATTTCATTCAAAGAAA	intergenic							3.59734	4.80039
ASHGA5P032306	0.0249722	0.0691289	2.30153	down	noncoding	ENST00000584779	AC010761.6	GENCODE	442	chr17	-	27059980	27069783	TTTTCTAACTGGGCTAGGGGAAAGGGTAGGGTCTGTGTGGAGCTACAGCTGCCTTCAGCC	natural antisense	NM_178170	NEK8	serine/threonine-protein kinase Nek8	+	27055831	27069784	3.8498	5.05239
ASHGA5P048761	0.00557413	0.0291543	2.30106	down	noncoding	ENST00000559298	RP11-502I4.1	GENCODE	5753	chr15	-	67695956	67813974	TCCTCTCCAGCTCAACTCTGCTTCTCTTCTTACTAAGGAAAGAGATCAAGGGGATTCTTG	natural antisense	NM_001031715	IQCH	IQ domain-containing protein H isoform 1	+	67547137	67794142	5.77036	6.97266
ASHGA5P048761	0.00557413	0.0291543	2.30106	down	noncoding	ENST00000559298	RP11-502I4.1	GENCODE	5753	chr15	-	67695956	67813974	TCCTCTCCAGCTCAACTCTGCTTCTCTTCTTACTAAGGAAAGAGATCAAGGGGATTCTTG	natural antisense	NM_001143936	C15orf61	uncharacterized protein C15orf61 precursor	+	67813521	67819641	5.77036	6.97266
ASHGA5P000141	0.00625657	0.030826	2.29945	down	noncoding	chr1:190265225-190278725-	chr1:190265225-190278725	LincRNAs identified by Khalil et al	13500	chr1	-	191998602	192012102	CTCTTTCCCTCAGAAGCTTATTATTCCATGCTCTGGTTGATTCTTCCAATGCACCCATTT	intergenic							4.16492	5.36621
ASHGA5P056078	0.00359905	0.0227046	2.29863	down	noncoding	TCONS_00027183	XLOC_013222	LincRNAs identified by Cabili et al	1895	chr19	-	10762540	10764556	TATGCTCACCCCATCTCCCTTGAGAGGCACAGAAGGTTAGAGATGTGTGCGAGGAACGGC	intergenic							7.17998	8.38075
ASHGA5P032253	0.000363419	0.00679734	2.29854	down	noncoding	ENST00000452599	RP11-383G10.5	GENCODE	686	chr1	-	205202948	205205995	CCTTCATTTAAAAAATGAAGAAACTCTCCACTCTCACTGCTTCATTTGACTACCCTTTAA	intronic antisense	NM_001242925	TMCC2	transmembrane and coiled-coil domains protein 2 isoform 2	+	205198058	205242471	5.06566	6.26638
ASHGA5P032253	0.000363419	0.00679734	2.29854	down	noncoding	ENST00000452599	RP11-383G10.5	GENCODE	686	chr1	-	205202948	205205995	CCTTCATTTAAAAAATGAAGAAACTCTCCACTCTCACTGCTTCATTTGACTACCCTTTAA	intronic antisense	NM_014858	TMCC2	transmembrane and coiled-coil domains protein 2 isoform 1	+	205197037	205242471	5.06566	6.26638
ASHGA5P021548	0.0291972	0.0754074	2.29252	down	noncoding	ENST00000534700	RP11-106J23.2	pseudogene	1315	chr16	-	70044653	70099679	ATATCCAGAGATATTCCAGGCCCACTCCAGGGCAGAATCCAAAATATTGGAGAACAAGGT								4.26718	5.46412
ASHGA5P018457	0.0136472	0.0487001	2.29235	down	noncoding	uc002yli.1	AK124194	UCSC_knowngene	2908	chr21	+	25801053	25862621	ATTTTAGCAAGCAAATGGAAGAAGAAAGAGGAGAGTGGTGGTGTGTGCTTTCCCTTTAAT	intergenic							3.78374	4.98057
ASHGA5P047693	0.00666786	0.0319469	2.29221	down	noncoding	DB341353		LincRNAs identified by Khalil et al	536	chr2	+	237515990	237518003	TCAGGCCCTGGCTTCCTGGGCCCTTTTCTAAAGAGGACCCTTCCTTCGTCCCTCTAAGAT	intergenic							5.04484	6.24158
ASHGA5P028466	0.0142198	0.0500843	2.28942	down	noncoding	ENST00000457719	RP11-418J17.3	GENCODE	898	chr1	-	119802887	119869926	CACTTCTTCCCTGACCCTCTTCTTGTAAATTTCTAAAACTAGCAATACAAGATTCAAATC	intergenic							5.62204	6.81702
ASHGA5P048826	4.70124e-05	0.00225782	2.28908	down	noncoding	NR_037653	ST20	RefSeq	681	chr15	-	80191181	80216096	GCGGAGGGACGGAGGGAAGATGGCTGCAGAGACCGGATATTGGCGCTGCCTCCCCGAATC	exon sense-overlapping	NM_001100879	ST20	suppressor of tumorigenicity 20 protein	-	80191181	80207598	3.47864	4.67341
ASHGA5P048826	4.70124e-05	0.00225782	2.28908	down	noncoding	NR_037653	ST20	RefSeq	681	chr15	-	80191181	80216096	GCGGAGGGACGGAGGGAAGATGGCTGCAGAGACCGGATATTGGCGCTGCCTCCCCGAATC	exon sense-overlapping	NM_001100880	ST20	suppressor of tumorigenicity 20 protein	-	80191181	80215664	3.47864	4.67341
ASHGA5P048826	4.70124e-05	0.00225782	2.28908	down	noncoding	NR_037653	ST20	RefSeq	681	chr15	-	80191181	80216096	GCGGAGGGACGGAGGGAAGATGGCTGCAGAGACCGGATATTGGCGCTGCCTCCCCGAATC	exon sense-overlapping	NM_001199757	ST20	suppressor of tumorigenicity 20 protein	-	80191181	80215664	3.47864	4.67341
ASHGA5P048826	4.70124e-05	0.00225782	2.28908	down	noncoding	NR_037653	ST20	RefSeq	681	chr15	-	80191181	80216096	GCGGAGGGACGGAGGGAAGATGGCTGCAGAGACCGGATATTGGCGCTGCCTCCCCGAATC	exon sense-overlapping	NM_001199760	ST20-MTHFS	ST20-MTHFS protein	-	80135888	80215448	3.47864	4.67341
ASHGA5P041605	0.00673508	0.0320952	2.28818	down	noncoding	uc011dhd.2	LOC729678	UCSC_knowngene	2892	chr5	+	180256958	180262726	TGAGATTAAGCCTAAGCCACCACCATCAGGGTCTCAGTCAGTCATCATTCTCATTTACTC	intergenic							5.68649	6.88069
ASHGA5P056875	0.0163559	0.054664	2.28786	down	noncoding	TCONS_00010118	XLOC_004584	LincRNAs identified by Cabili et al	4758	chr5	+	141543139	141548174	TACTCTGCTTTCTTCTTCACAGGATTCCCTTTATTGAAGGTGGGAATGAGGGGGATTCTG	intergenic							5.83563	7.02963
ASHGA5P019243	0.00401209	0.0242085	2.28624	down	noncoding	ENST00000475102	RP11-550I24.2	GENCODE	384	chr3	+	156948067	157033684	ATCGTGAGTGGTTGTTGGATCTTTCCAGATCACCACACCACATCACCCAGCCACTCTGCC	intronic antisense	NM_001167911	VEPH1	ventricular zone-expressed PH domain-containing protein homolog 1 isoform 2	-	156977531	157221136	4.2633	5.45628
ASHGA5P019243	0.00401209	0.0242085	2.28624	down	noncoding	ENST00000475102	RP11-550I24.2	GENCODE	384	chr3	+	156948067	157033684	ATCGTGAGTGGTTGTTGGATCTTTCCAGATCACCACACCACATCACCCAGCCACTCTGCC	intronic antisense	NM_001167912	VEPH1	ventricular zone-expressed PH domain-containing protein homolog 1 isoform 1	-	156977531	157221136	4.2633	5.45628
ASHGA5P019243	0.00401209	0.0242085	2.28624	down	noncoding	ENST00000475102	RP11-550I24.2	GENCODE	384	chr3	+	156948067	157033684	ATCGTGAGTGGTTGTTGGATCTTTCCAGATCACCACACCACATCACCCAGCCACTCTGCC	intronic antisense	NM_024621	VEPH1	ventricular zone-expressed PH domain-containing protein homolog 1 isoform 1	-	156977531	157217445	4.2633	5.45628
ASHGA5P022959	0.00556224	0.0291252	2.28353	down	noncoding	ENST00000566475	HCG22	GENCODE	549	chr6	+	31021983	31027434	CCGAGCGAAGAAAGAGTGTTTCCTGCCTCCATTAAATCCATCCACCAGGGTTATTTATCA	intergenic							4.82518	6.01645
ASHGA5P054659	0.0206864	0.0618808	2.27868	down	noncoding	NR_029409	LOC255512	RefSeq	1024	chr11	+	1330937	1331937	TGCTCTCTCCTCGAGCCCTGCAGCCCGGCGAAATGGCTCCCGGCGGGGCCGTTTGCGCAT	bidirectional	NM_019009	TOLLIP	toll-interacting protein	-	1295597	1330892	5.03929	6.22749
ASHGA5P033181	0.00313404	0.0209261	2.27803	down	noncoding	ENST00000466037	HOXB-AS3	GENCODE	522	chr17	+	46673800	46683756	TGAGCAGTTTGCTCTCCTTTTTCCACTTCATGCGTCGGTTCTGGAACCATATCTTGATCT	natural antisense	NM_018952	HOXB6	homeobox protein Hox-B6	-	46673098	46682334	4.05736	5.24515
ASHGA5P050608	0.0395333	0.0890248	2.27611	down	noncoding	uc002tee.4	FLJ38668	UCSC_knowngene	555	chr2	-	109123996	109150675	AGGCTAGTCTGGGAGGCTGGCGCAAACGCAGCGGGTGGCTGGGGTAGGGGCTCATTGGGA	natural antisense	NM_181453	GCC2	GRIP and coiled-coil domain-containing protein 2	+	109065576	109125854	5.27431	6.46088
ASHGA5P042259	0.0102478	0.0412642	2.27609	down	noncoding	ENST00000443928	RP11-404F10.2	GENCODE	791	chr1	+	160643135	160653612	CTGGCTGGTGGAACTTGAATGTATACAACACTCTTCATTTGCATGTTTTGACATTTTAAA	intronic antisense	NM_001256030	CD48	CD48 antigen isoform 2 precursor	-	160650211	160681641	4.2164	5.40296
ASHGA5P042259	0.0102478	0.0412642	2.27609	down	noncoding	ENST00000443928	RP11-404F10.2	GENCODE	791	chr1	+	160643135	160653612	CTGGCTGGTGGAACTTGAATGTATACAACACTCTTCATTTGCATGTTTTGACATTTTAAA	natural antisense	NM_001778	CD48	CD48 antigen isoform 1 precursor	-	160648535	160681641	4.2164	5.40296
ASHGA5P039760	0.000439601	0.00756261	2.27221	down	noncoding	uc001ebz.3	DKFZp547A023	UCSC_knowngene	1446	chr1	+	112999439	113006065	GAAAATCAGCTTGACCAAAGTCACAGCTCCTTCCCTGGACAGCTCATATATTAATACAAA	exon sense-overlapping	NM_018704	CTTNBP2NL	CTTNBP2 N-terminal-like protein	+	112938799	113003786	4.4497	5.6338
ASHGA5P043415	0.0161716	0.0542956	2.26983	down	noncoding	ENST00000497366	RP4-584D14.6	GENCODE	420	chr7	-	150076942	150080973	ATCTCCACACCTTCCACATGTAGATATCCTCAACGTTCTTCACAGAGGGGATGCCCGCAC	intronic antisense	NM_173680	ZNF775	zinc finger protein 775	+	150076405	150095719	4.98245	6.16504
ASHGA5P028982	0.0164963	0.0548944	2.26867	down	noncoding	ENST00000548107	CTD-2314B22.3	GENCODE	617	chr14	-	19912754	19925311	TAAAGGGGGCTCTCTGGCCTTGAAATAGTGATGTTTTTTATACAGAAAGGAGAATGCAGA	intergenic							3.90196	5.08381
ASHGA5P039359	0.0192245	0.0595749	2.26794	down	noncoding	ENST00000505347	RP11-3J1.1	GENCODE	641	chr4	-	19173957	19458617	TTGTTACATCTTAACTGCCGTCTTCTGTCTCCCTACAAAATCGTAGTCATCTCCTACTTA	intergenic							5.97103	7.15241
ASHGA5P039650	5.15074e-05	0.00236758	2.2672	down	noncoding	ENST00000510975	RP11-526A4.1	GENCODE	499	chr4	-	150658765	150736966	GGCTTGAATTGGAAAATTAATGTGAACCGGGCTCCATTCCTCAGGACCTCATTACCCTAA	intergenic							3.28764	4.46855
ASHGA5P033915	0.000673826	0.00972356	2.26702	down	noncoding	ENST00000577382	RP11-100K18.1	GENCODE	2727	chr18	+	75897222	75900887	ACAATAGCCTTCCTCCCAAGACTGTGGAATAAATAAGAGACACATCGCTCCAAAACATTT	intergenic							5.35913	6.53992
ASHGA5P048833	0.00476017	0.0264738	2.26644	down	noncoding	uc010blu.2	LOC727849	UCSC_knowngene	2449	chr15	-	82764077	82798350	TGGAATCCAGTCCCATTTCCTTCCTGGCCACGCCTGTCCAGCGGCCTCTTCAGCCGCATT	intergenic							4.8836	6.06403
ASHGA5P028194	0.00108313	0.0120189	2.26466	down	noncoding	TCONS_00010108	XLOC_004576	LincRNAs identified by Cabili et al	680	chr5	+	139529832	139531887	TTATGAATCAAGGCTCAGAGATGACACCATCCCTATCCATAGGCAGCTGAAGTGATGAGA	intergenic							2.85009	4.02938
ASHGA5P027627	0.00075364	0.0101838	2.26455	down	noncoding	TCONS_00012176	XLOC_005731	LincRNAs identified by Cabili et al	399	chr6	-	43834217	43836122	TGGGGTTTCAGGATTCCTCTCCATCCTTATTCCGCAACCCTCAGGTTCTGAAAAACTGAC	intergenic							4.50424	5.68346
ASHGA5P037779	0.0397101	0.0891567	2.26356	down	noncoding	uc002zlk.3	P712P	UCSC_knowngene	2566	chr22	+	16274557	16278600	TCTTTTGTGATCAAAAATTCCTTACTTTTAGTTTTTTATCTATGGTAGAACCACCCAGAG	natural antisense	NM_001136213	POTEH	POTE ankyrin domain family member H	-	16256331	16287937	3.53058	4.70917
ASHGA5P016564	0.00737554	0.0336715	2.25713	down	noncoding	ENST00000431722	RP5-1185I7.1	GENCODE	564	chr7	+	77619700	77624259	TTTGAAAACTCCGTTCCTCCCCTTCACCTCCACCTGATTATTCATGTCGTGAAGAAACTG	intergenic							9.90309	11.0776
ASHGA5P049671	0.0124354	0.0463138	2.25654	down	noncoding	TCONS_00019986	XLOC_009261	LincRNAs identified by Cabili et al	281	chr11	+	102511868	102548516	AGCCCTGAAGCAGGCAAAGGAAAAGTGGCACGGCAGGAAGCAAGTCAGATGAGGGGGCCT	intergenic							6.43618	7.61029
ASHGA5P020872	0.0169118	0.055496	2.25587	down	noncoding	ENST00000521213	FAM90A11P	GENCODE	485	chr8	-	7872832	7874534	TCCAATTAAAAGGTTAGGGTACGTTCCATGTCAGGTGACCAGAGGCAGTATAAAAGGCAG	intergenic							3.18871	4.36239
ASHGA5P054716	0.0204309	0.0614166	2.25488	down	noncoding	TCONS_00006771	XLOC_003405	LincRNAs identified by Cabili et al	9659	chr3	-	197363337	197374168	TGTTAAAGATTGAGGGTCATGCAGCTGAAGACTCTGGGAGGAGCTGACGTTCTAATTTGA	intergenic							3.33874	4.51179
ASHGA5P051307	0.00698275	0.0329037	2.25476	down	noncoding	uc003apb.1	AX747758	UCSC_knowngene	1759	chr22	-	36633472	36635231	CAGAAGAAAGGTAGGTGTTGGGGGTGCCCATCTCTTTGGGAAATTTGAAGGAATCAAAGA	intron sense-overlapping	NM_030882	APOL2	apolipoprotein L2	-	36622254	36635689	3.27646	4.44943
ASHGA5P051307	0.00698275	0.0329037	2.25476	down	noncoding	uc003apb.1	AX747758	UCSC_knowngene	1759	chr22	-	36633472	36635231	CAGAAGAAAGGTAGGTGTTGGGGGTGCCCATCTCTTTGGGAAATTTGAAGGAATCAAAGA	intron sense-overlapping	NM_145637	APOL2	apolipoprotein L2	-	36622254	36636000	3.27646	4.44943
ASHGA5P035846	0.045812	0.097582	2.25209	down	noncoding	ENST00000421759	AC073283.7	GENCODE	860	chr2	+	47294960	47298343	AGGAGCGTCTTGGCTCTGTGACCTCTGATGAGATGATTTTATTGTGAGCTTTCTGTTCAC	intron sense-overlapping	NM_020458	TTC7A	tetratricopeptide repeat protein 7A	+	47168312	47303275	6.30145	7.47272
ASHGA5P052447	0.0129713	0.0473885	2.25147	down	noncoding	ENST00000443800	AC005592.2	GENCODE	566	chr5	+	141783765	142051566	TGCTGGTAGACGCACACCATCACATCCTACATAATATTTAGCTCTGAGGCGTTTCCAGAT	intronic antisense	NM_000800	FGF1	fibroblast growth factor 1 isoform 1 precursor	-	141971742	142066060	3.45054	4.62141
ASHGA5P052447	0.0129713	0.0473885	2.25147	down	noncoding	ENST00000443800	AC005592.2	GENCODE	566	chr5	+	141783765	142051566	TGCTGGTAGACGCACACCATCACATCCTACATAATATTTAGCTCTGAGGCGTTTCCAGAT	intronic antisense	NM_001144892	FGF1	fibroblast growth factor 1 isoform 1 precursor	-	141971742	142000920	3.45054	4.62141
ASHGA5P052447	0.0129713	0.0473885	2.25147	down	noncoding	ENST00000443800	AC005592.2	GENCODE	566	chr5	+	141783765	142051566	TGCTGGTAGACGCACACCATCACATCCTACATAATATTTAGCTCTGAGGCGTTTCCAGAT	intronic antisense	NM_001144934	FGF1	fibroblast growth factor 1 isoform 1 precursor	-	141971742	142077635	3.45054	4.62141
ASHGA5P052447	0.0129713	0.0473885	2.25147	down	noncoding	ENST00000443800	AC005592.2	GENCODE	566	chr5	+	141783765	142051566	TGCTGGTAGACGCACACCATCACATCCTACATAATATTTAGCTCTGAGGCGTTTCCAGAT	intronic antisense	NM_001144935	FGF1	fibroblast growth factor 1 isoform 1 precursor	-	141971742	142077635	3.45054	4.62141
ASHGA5P052447	0.0129713	0.0473885	2.25147	down	noncoding	ENST00000443800	AC005592.2	GENCODE	566	chr5	+	141783765	142051566	TGCTGGTAGACGCACACCATCACATCCTACATAATATTTAGCTCTGAGGCGTTTCCAGAT	intronic antisense	NM_001257205	FGF1	fibroblast growth factor 1 isoform 1 precursor	-	141971742	142077635	3.45054	4.62141
ASHGA5P052447	0.0129713	0.0473885	2.25147	down	noncoding	ENST00000443800	AC005592.2	GENCODE	566	chr5	+	141783765	142051566	TGCTGGTAGACGCACACCATCACATCCTACATAATATTTAGCTCTGAGGCGTTTCCAGAT	intronic antisense	NM_001257206	FGF1	fibroblast growth factor 1 isoform 4 precursor	-	141971742	142077635	3.45054	4.62141
ASHGA5P052447	0.0129713	0.0473885	2.25147	down	noncoding	ENST00000443800	AC005592.2	GENCODE	566	chr5	+	141783765	142051566	TGCTGGTAGACGCACACCATCACATCCTACATAATATTTAGCTCTGAGGCGTTTCCAGAT	intronic antisense	NM_001257207	FGF1	fibroblast growth factor 1 isoform 1 precursor	-	141971742	142066060	3.45054	4.62141
ASHGA5P052447	0.0129713	0.0473885	2.25147	down	noncoding	ENST00000443800	AC005592.2	GENCODE	566	chr5	+	141783765	142051566	TGCTGGTAGACGCACACCATCACATCCTACATAATATTTAGCTCTGAGGCGTTTCCAGAT	intronic antisense	NM_001257208	FGF1	fibroblast growth factor 1 isoform 1 precursor	-	141971742	142065268	3.45054	4.62141
ASHGA5P052447	0.0129713	0.0473885	2.25147	down	noncoding	ENST00000443800	AC005592.2	GENCODE	566	chr5	+	141783765	142051566	TGCTGGTAGACGCACACCATCACATCCTACATAATATTTAGCTCTGAGGCGTTTCCAGAT	intronic antisense	NM_001257209	FGF1	fibroblast growth factor 1 isoform 1 precursor	-	141971742	142065268	3.45054	4.62141
ASHGA5P052447	0.0129713	0.0473885	2.25147	down	noncoding	ENST00000443800	AC005592.2	GENCODE	566	chr5	+	141783765	142051566	TGCTGGTAGACGCACACCATCACATCCTACATAATATTTAGCTCTGAGGCGTTTCCAGAT	intronic antisense	NM_001257210	FGF1	fibroblast growth factor 1 isoform 1 precursor	-	141971742	142023866	3.45054	4.62141
ASHGA5P052447	0.0129713	0.0473885	2.25147	down	noncoding	ENST00000443800	AC005592.2	GENCODE	566	chr5	+	141783765	142051566	TGCTGGTAGACGCACACCATCACATCCTACATAATATTTAGCTCTGAGGCGTTTCCAGAT	intronic antisense	NM_001257211	FGF1	fibroblast growth factor 1 isoform 4 precursor	-	141971742	142065268	3.45054	4.62141
ASHGA5P052447	0.0129713	0.0473885	2.25147	down	noncoding	ENST00000443800	AC005592.2	GENCODE	566	chr5	+	141783765	142051566	TGCTGGTAGACGCACACCATCACATCCTACATAATATTTAGCTCTGAGGCGTTTCCAGAT	intronic antisense	NM_001257212	FGF1	fibroblast growth factor 1 isoform 4 precursor	-	141971742	142000920	3.45054	4.62141
ASHGA5P052447	0.0129713	0.0473885	2.25147	down	noncoding	ENST00000443800	AC005592.2	GENCODE	566	chr5	+	141783765	142051566	TGCTGGTAGACGCACACCATCACATCCTACATAATATTTAGCTCTGAGGCGTTTCCAGAT	intronic antisense	NM_033136	FGF1	fibroblast growth factor 1 isoform 2 precursor	-	141971742	142066060	3.45054	4.62141
ASHGA5P052447	0.0129713	0.0473885	2.25147	down	noncoding	ENST00000443800	AC005592.2	GENCODE	566	chr5	+	141783765	142051566	TGCTGGTAGACGCACACCATCACATCCTACATAATATTTAGCTCTGAGGCGTTTCCAGAT	intronic antisense	NM_033137	FGF1	fibroblast growth factor 1 isoform 3 precursor	-	141971742	141993726	3.45054	4.62141
ASHGA5P053112	0.00143084	0.0138735	2.25093	down	noncoding	ENST00000416643	AC005488.13	pseudogene	830	chr7	-	72492627	72497423	TTTGTTCCATGCGCTGCAGGGCTTGGGTTTCCCTGGAGGAGTTGGAAGAGGTGGGTGGGG								3.87608	5.0466
ASHGA5P039009	0.00669993	0.0320436	2.25041	down	noncoding	ENST00000498923	NUDT16P	GENCODE	1706	chr3	+	131080755	131083375	ACCTTCCTTGCGGCGCTACTCTCGGGTGTCCCTGCCAATCCCAGCTTCCTCCTCTCTCAG	intergenic							6.20633	7.37652
ASHGA5P017582	0.00722856	0.0333941	2.24814	down	noncoding	ENST00000443364	RP11-48O20.4	GENCODE	804	chr1	+	159931007	159946902	CACCCACCTCATTTTTCTAATAAGAGCTTTCAATAAACCTCTCTTTCTTGAAGTTACCTG	intergenic							3.98735	5.15609
ASHGA5P040146	0.0202029	0.061059	2.24796	down	noncoding	ENST00000438000	BX571672.1	GENCODE	1786	chr1	+	143119060	143233417	ACACTTGTGTGTATGCTTTAGATCCTGTTTTTTGTTGTTGTTGTTTTGGTTTGGTTTGGT	intergenic							3.94354	5.11216
ASHGA5P027430	0.00156441	0.0144834	2.24762	down	noncoding	ENST00000552098	CTD-2021H9.1	GENCODE	541	chr12	-	71401552	71425863	ATATCAGACACATTTGATCTCCCTCCCTTCCCCAAAAATAAAATTGTCTCATTTCAGGTG	intergenic							11.1604	12.3288
ASHGA5P054779	0.0181581	0.0578761	2.24663	down	noncoding	ENST00000445840	RP4-669L17.4	pseudogene	180	chr1	+	334125	334305	TGCAGGACAAGTTCGAGCATCTTAAAATGATTCAACAGGAGGAGATAAGGAAGCTCGAGG								3.70745	4.87521
ASHGA5P038552	6.67143e-05	0.00271844	2.24653	down	noncoding	uc003fgn.1	AY940074	UCSC_knowngene	1559	chr3	-	169858399	169859958	TTTGGAATATCTCACTTTTATTTACTATGTTAAATGCTCCATTCCTTCTCCCCACCAGGC	intron sense-overlapping	NM_024947	PHC3	polyhomeotic-like protein 3	-	169805367	169899537	5.73478	6.90248
ASHGA5P030684	0.022491	0.0645068	2.24614	down	noncoding	ENST00000564933	RP11-160C18.2	pseudogene	1432	chr15	+	79019518	79027837	CCCCACCCCACGATGTTAGAAGAAACTCAACAGAGGAAACTGGCCACAGCCAAGAAAAAA								7.93591	9.10336
ASHGA5P042980	0.0038608	0.0235764	2.24441	down	noncoding	ENST00000579174	AC005154.6	GENCODE	755	chr7	-	30614319	30634424	GATAAGTAAATTCCTATCAACTTTCCTTGGTGTCCTTCTTGTATATTTACTGTAAGCTGG	natural antisense	NM_002047	GARS	glycine--tRNA ligase precursor	+	30634180	30673648	4.23319	5.39952
ASHGA5P030367	0.0318535	0.0789649	2.24413	down	noncoding	ENST00000441272	RP11-66D17.3	GENCODE	4120	chr1	-	156657488	156661789	GAGCCACTGTCCTCTCCATTCTTTTTATTGTTATTTTGCCTTTTGAAAATATTTTTGCAT	intergenic							6.49006	7.65621
ASHGA5P029582	0.00220952	0.0173534	2.24241	down	noncoding	TCONS_00008273	XLOC_003714	LincRNAs identified by Cabili et al	741	chr4	+	143772644	143778965	TCATTGACTGTGCTTCTATTTAAAGTTAACCCTTTCCTCTCCTCCCACTAACTGAATGAT	intergenic							7.01749	8.18254
ASHGA5P053164	0.0149212	0.0517835	2.23864	down	noncoding	ENST00000452471	AC005009.2	GENCODE	687	chr7	-	86413541	86415908	AGTTATATTAATCAGGACCTGAACCCCTCAGGGAGACAGAGAATGAAAGGACCTAAAAAA	natural antisense	NM_000840	GRM3	metabotropic glutamate receptor 3 precursor	+	86273229	86494192	8.60345	9.76607
ASHGA5P048248	0.00635723	0.0310488	2.23678	down	noncoding	AL713779R		LincRNAs identified by Khalil et al	2775	chr3	-	128268891	128271202	AAAGTCACGTGGAGATGGTGTCTCTCTTCCATTTGCCTTCCACATCACAAAAGTGCACAT	intergenic							3.508	4.66942
ASHGA5P033812	0.00253047	0.0185685	2.23542	down	noncoding	ENST00000580420	RP11-326K13.4	GENCODE	1582	chr18	+	29522537	29524119	TGTGTACTGTCCTGAACCGGCTTTCATTCCTAACTTTTCAAAGATTGCTTTAAAGGGGGG	natural antisense	NM_014939	TRAPPC8	trafficking protein particle complex subunit 8	-	29409135	29523091	5.92766	7.0882
ASHGA5P033032	0.0234801	0.0662922	2.23395	down	noncoding	TCONS_00029153	XLOC_014094	LincRNAs identified by Cabili et al	337	chr21	-	44071700	44072723	AGGAACCCTTTCCTCTCCCAGATCCCCATGGAGCAGTGCGGTCTTCCATTCGTCAACAAT	intergenic							6.49181	7.6514
ASHGA5P033839	0.00803565	0.0355106	2.23306	down	noncoding	uc002las.2	LOC284260	UCSC_knowngene	3322	chr18	+	39766634	40098918	ATCTCTCCCCATCCCATCGTTTCTAGCTTATAGCATATGAATAAATGCAGTTTCCAAGTT	intergenic							7.76647	8.92549
ASHGA5P036880	0.0104657	0.0418018	2.23183	down	noncoding	ENST00000435412	C20orf90	GENCODE	332	chr20	-	61326375	61331832	TTGGAGTTGGAGCAGGAAGCTGAGGGTCTTGTCATGCCCGCCCTTCCTTCCACGTGGCTC	intergenic							7.7478	8.90602
ASHGA5P040927	0.000183518	0.00478865	2.23159	down	noncoding	ENST00000513771	CTC-338M12.2	GENCODE	411	chr5	-	180618045	180618852	CGGCTCTACCTGTCACATTCGCTTTCAGCCTAAAACAAAATTTTAGTTTATTTTAGACAA	intergenic							4.06152	5.2196
ASHGA5P020163	0.00357027	0.0226109	2.22949	down	noncoding	uc001uie.3	BC061923	UCSC_knowngene	631	chr12	+	129595537	129597843	TGGCTCAGTTTTGATTTCATCTCCCAAGGTCTTCTTTCTGAAACCAGCCCAACTTTTCTC	intronic antisense	NM_133448	TMEM132D	transmembrane protein 132D precursor	-	129556270	130388212	4.33999	5.49671
ASHGA5P018291	0.00902468	0.0379572	2.22785	down	noncoding	ENST00000451648	RP11-93B14.5	GENCODE	649	chr20	-	61294370	61297979	GCACCACCAGCCTCTCACCAGAGCAGACTGTCGGCCTCACATCACCCCCACCTGCAGGAG	natural antisense	NM_016354	SLCO4A1	solute carrier organic anion transporter family member 4A1	+	61273796	61303647	8.93123	10.0869
ASHGA5P032666	0.0136168	0.0486619	2.2267	down	noncoding	uc002jrt.3	AX747521	UCSC_knowngene	2016	chr17	-	74492855	74494871	TTCCCTCTCCCAGTGGGTCTCCCCAGGTTGTCAGCTCCATTTAGTCATAAGAAGATCTGG	intron sense-overlapping	NM_024599	RHBDF2	inactive rhomboid protein 2 isoform 1	-	74466974	74497509	7.13242	8.28733
ASHGA5P051961	0.00128212	0.0132986	2.22353	down	noncoding	ENST00000502496	TMPRSS11GP	GENCODE	389	chr4	-	68857529	68863205	TTCACCCCCATCATATTTTCCAATGAGGTGCACAGAGTCTGTCTTCCAGAAGCTACTTTT	intergenic							4.89637	6.04922
ASHGA5P057465	0.00122583	0.0129034	2.22301	down	noncoding	TCONS_00018120	XLOC_008380	LincRNAs identified by Cabili et al	269	chr10	+	8083980	8084832	GACAAAGGGCTACAAGGCTGGTGAATAAATTATCTCCTTCCTCCCCCACTTCCTCCCCAT	intergenic							8.93057	10.0831
ASHGA5P035297	0.010321	0.0414454	2.2217	down	noncoding	ENST00000433431	AC079776.7	pseudogene	123	chr2	-	130725830	130725953	GGGATAGCGTCTCTCACCATCTTGACTGCTTACCAACAGAAGCGCCAAAACCAAACTTGA								3.32648	4.47814
ASHGA5P037703	5.70765e-05	0.00254498	2.2209	down	noncoding	ENST00000414261	RP5-1042K10.10	GENCODE	432	chr22	-	40768667	40784294	GCATAGAAAGATGGCTGTAAAATAAAAGAGATGATTATCTCCTCCCTTCCCTTCTCAATA	intronic antisense	NM_015705	SGSM3	small G protein signaling modulator 3	+	40766594	40806293	6.83572	7.98686
ASHGA5P000256	0.00600497	0.0301578	2.22068	down	noncoding	chr13:57331500-57346525+	chr13:57331500-57346525	LincRNAs identified by Khalil et al	15025	chr13	+	58433499	58448524	GCTCTCATCCTCTGCTGAATAAGGAACAATTCCTTTTAAAGTATTAACTGATAACCACAT	intergenic							3.69217	4.84318
ASHGA5P043219	0.0117517	0.0446487	2.21973	down	noncoding	TCONS_00018397	XLOC_008679	LincRNAs identified by Cabili et al	211	chr10	+	134830881	134831148	GAGGGGTCCAACCATTTCTCATGTATGGCCACACACCACTTCCGTTCACAGAGACCCCAG	intergenic							3.82668	4.97707
ASHGA5P026366	0.0151436	0.0521626	2.21957	down	noncoding	ENST00000416119	RP11-240D10.4	GENCODE	623	chr1	-	55087149	55094111	CTAAAGTTCGAGGCCATTCACAACCTGATCCCAACGTTCTTCCAATCTTTTATCTTTTTT	intron sense-overlapping	NM_176782	FAM151A	protein FAM151A	-	55074849	55089200	3.59155	4.74183
ASHGA5P026366	0.0151436	0.0521626	2.21957	down	noncoding	ENST00000416119	RP11-240D10.4	GENCODE	623	chr1	-	55087149	55094111	CTAAAGTTCGAGGCCATTCACAACCTGATCCCAACGTTCTTCCAATCTTTTATCTTTTTT	intronic antisense	NM_015547	ACOT11	acyl-coenzyme A thioesterase 11 isoform 1	+	55013806	55100417	3.59155	4.74183
ASHGA5P018935	0.000716386	0.00995678	2.2174	down	noncoding	uc010lwv.3	ADAM3A	UCSC_knowngene	1087	chr8	-	39308563	39333040	TTGGCTTACAAAAAAAGTGTACCCTTGCTTCCAAAACGACGTGCTGCTCCTAAAAACAAT	intergenic							3.81414	4.96301
ASHGA5P048563	0.00140424	0.0137681	2.21436	down	noncoding	TCONS_00004669	XLOC_001314	LincRNAs identified by Cabili et al	1251	chr2	+	1562697	1567389	CCGCTTCTGTGGGCCCCGCAGGACACTCGGCACTTCTGAGCAAGGTTTCTCGTCTGCAAA	intergenic							5.85655	7.00344
ASHGA5P033430	0.00453398	0.0258073	2.21382	down	noncoding	ENST00000582106	MAFG-AS1	GENCODE	1895	chr17	+	79885704	79888629	AAGCTGAGCCAAGCAGAGGCGGGCAGCTCCTCCTCCAGGGCCCACCTGGCCTGCTGGGGA	bidirectional	NM_002359	MAFG	transcription factor MafG	-	79876144	79885587	5.20346	6.34999
ASHGA5P047778	0.00397833	0.0241239	2.21261	down	noncoding	ENST00000445868	RP11-462G8.2	GENCODE	760	chr10	+	132897967	132903660	ACTCCACCCTTCACTGTGCTGCTAGTGTTCTCTGGACCACTCCTATTTCATCACTATTAT	intronic antisense	NM_174937	TCERG1L	transcription elongation regulator 1-like protein	-	132890654	133109984	8.18746	9.33321
ASHGA5P044562	0.00837373	0.0364046	2.2126	down	noncoding	ENST00000501440	CTD-3064M3.4	GENCODE	1380	chr8	-	142400038	142402674	GCAGCCCCTTCCCGTTTCACTGTGGCTGCATTTTAATTCTTATTTTTTAAATGTTTAGCT	intronic antisense	ENST00000520105	PTP4A3	protein tyrosine phosphatase type IVA, member 3 [Source:HGNC Symbol;Acc:9636]	+	142402094	142441620	5.48903	6.63477
ASHGA5P044562	0.00837373	0.0364046	2.2126	down	noncoding	ENST00000501440	CTD-3064M3.4	GENCODE	1380	chr8	-	142400038	142402674	GCAGCCCCTTCCCGTTTCACTGTGGCTGCATTTTAATTCTTATTTTTTAAATGTTTAGCT	intronic antisense	ENST00000521578	PTP4A3	protein tyrosine phosphatase type IVA, member 3 [Source:HGNC Symbol;Acc:9636]	+	142402092	142441394	5.48903	6.63477
ASHGA5P044562	0.00837373	0.0364046	2.2126	down	noncoding	ENST00000501440	CTD-3064M3.4	GENCODE	1380	chr8	-	142400038	142402674	GCAGCCCCTTCCCGTTTCACTGTGGCTGCATTTTAATTCTTATTTTTTAAATGTTTAGCT	intronic antisense	ENST00000523147	PTP4A3	protein tyrosine phosphatase type IVA, member 3 [Source:HGNC Symbol;Acc:9636]	+	142402120	142437051	5.48903	6.63477
ASHGA5P047550	0.00157729	0.0145573	2.20962	down	noncoding	uc001kdm.1	AX746544	UCSC_knowngene	2619	chr10	+	87403829	87407823	TTCGAATGCTCCCCTCCCCATGACCTCCTCAACCAATTTGGTCTTTGAAAAAATAAAAAA	natural antisense	NM_017551	GRID1	glutamate receptor delta-1 subunit precursor	-	87359311	88126250	11.7096	12.8534
ASHGA5P042869	0.00253729	0.0185685	2.20763	down	noncoding	ENST00000549241	RP11-449P15.1	GENCODE	1562	chr7	-	1094995	1098897	ATTTGTGGGAAAAAGGAAACTTCAAGAAAAACACCCCTCCTGCTTCTCTTCCAGCAGCTC	intron sense-overlapping	NM_001134395	C7orf50	uncharacterized protein C7orf50	-	1036622	1177893	7.50249	8.64499
ASHGA5P042869	0.00253729	0.0185685	2.20763	down	noncoding	ENST00000549241	RP11-449P15.1	GENCODE	1562	chr7	-	1094995	1098897	ATTTGTGGGAAAAAGGAAACTTCAAGAAAAACACCCCTCCTGCTTCTCTTCCAGCAGCTC	intron sense-overlapping	NM_001134396	C7orf50	uncharacterized protein C7orf50	-	1036622	1177893	7.50249	8.64499
ASHGA5P042869	0.00253729	0.0185685	2.20763	down	noncoding	ENST00000549241	RP11-449P15.1	GENCODE	1562	chr7	-	1094995	1098897	ATTTGTGGGAAAAAGGAAACTTCAAGAAAAACACCCCTCCTGCTTCTCTTCCAGCAGCTC	intron sense-overlapping	NM_032350	C7orf50	uncharacterized protein C7orf50	-	1036622	1177893	7.50249	8.64499
ASHGA5P042869	0.00253729	0.0185685	2.20763	down	noncoding	ENST00000549241	RP11-449P15.1	GENCODE	1562	chr7	-	1094995	1098897	ATTTGTGGGAAAAAGGAAACTTCAAGAAAAACACCCCTCCTGCTTCTCTTCCAGCAGCTC	natural antisense	NM_138445	GPR146	probable G-protein coupled receptor 146	+	1097140	1098897	7.50249	8.64499
ASHGA5P052323	0.0468076	0.0986543	2.2037	down	noncoding	ENST00000513704	CTC-454M9.1	GENCODE	563	chr5	+	88185124	88239160	CTCCCTCTCAAACCGCACCATTGGCACAGACTAATATTTATACAACTTTTTATTTTAAAC	intronic antisense	NM_001131005	MEF2C	myocyte-specific enhancer factor 2C isoform 2	-	88014057	88199922	6.51909	7.65902
ASHGA5P052323	0.0468076	0.0986543	2.2037	down	noncoding	ENST00000513704	CTC-454M9.1	GENCODE	563	chr5	+	88185124	88239160	CTCCCTCTCAAACCGCACCATTGGCACAGACTAATATTTATACAACTTTTTATTTTAAAC	intronic antisense	NM_001193347	MEF2C	myocyte-specific enhancer factor 2C isoform 3	-	88014057	88199922	6.51909	7.65902
ASHGA5P055612	0.00121372	0.0128412	2.20348	down	noncoding	TCONS_00003611	XLOC_001406	LincRNAs identified by Cabili et al	1425	chr2	+	27938768	27977766	CTGGGCTGGTCCTCCCGGATCCACTCCTCTCCCACACTCCCTCACCTCCCCCCTCCCTCC	intergenic							12.3086	13.4483
ASHGA5P054641	0.00364955	0.0229084	2.20201	down	noncoding	ENST00000524824	RP11-326C3.12	GENCODE	587	chr11	+	327309	330122	TCCAGTCCCCTCCCCACCCTATCCTGGAGCTTGTCAAGGCCACCAGAGACCTGCTCCCTG	intergenic							12.1437	13.2825
ASHGA5P020997	0.00243573	0.0182156	2.19955	down	noncoding	NR_046232	C8orf69	RefSeq	522	chr8	-	96219234	96228602	CATCCAGAAGACCCCCTCCCTCTTCCCTGAGCTCTGTTTCTTCCATGAGGTTGAAGAAAA	intergenic							12.3688	13.506
ASHGA5P034891	0.000528802	0.00837438	2.19947	down	noncoding	NR_038434	LOC100506474	RefSeq	1944	chr2	-	13106907	13147138	TCTGTAGTTCATTTCATTTCCCCAGATTTGTTATCATCCACCATCACTCATACAAGCCTA	intergenic							4.11298	5.25014
ASHGA5P045189	0.0289752	0.0751101	2.19512	down	noncoding	ENST00000423963	RP11-443B7.2	GENCODE	423	chr1	+	235092977	235095736	GGTTGGAGTGCTACTTAAAATAATTTTGCCAAATGTTCCATCTCTCTGTGTTGATGAATA	intergenic							3.45009	4.58439
ASHGA5P016046	0.00313645	0.0209271	2.19314	down	noncoding	ENST00000426185	HCG22	GENCODE	1980	chr6	+	31021983	31027653	CTTCATTGTGAAAGAGTGTTTCCTGCCTCCATTAAATCCATCCACCAGGGTTATTTATCA	intergenic							4.72657	5.85958
ASHGA5P047857	0.0285848	0.0745003	2.19256	down	noncoding	ENST00000454892	HBBP1	GENCODE	455	chr11	-	5263183	5264496	CTGCCTGCTGATTCAGTTCCTGCATGATAAAAATAGAATAAAGAAATATGCTCTCTAAGA	intergenic							4.3811	5.51371
ASHGA5P051189	0.00174559	0.015403	2.19185	down	noncoding	uc002zoe.3	AL117485	UCSC_knowngene	3839	chr22	+	18840391	18847477	GGAGAGTGGCTCAGAGCGGGGCTCACAGCTGCTGGTGGGGAGGTCTTTGGGGCCCAAGCT	intergenic							4.14109	5.27323
ASHGA5P023797	0.0227595	0.0650342	2.1918	down	noncoding	HMlincRNA457-	HMlincRNA457	LincRNAs identified by Khalil et al	9550	chr3	-	25863830	25873380	CCTCCTCTGAACCGTTGAGAGACTTGAGAAGAACAATGCACCAAGCACAGTCTGAAAATT	intergenic							4.95533	6.08745
ASHGA5P046764	0.00998035	0.0405413	2.19111	down	noncoding	uc022coe.1	BC062752	UCSC_knowngene	1125	chrY	-	20934593	20981392	CATGTTTTCACTTGAGGGCTTAACAACTTGAGTGGTTTTTCACAATAAGCACATTCTTAA	exon sense-overlapping	NM_001001877	HSFY2	heat shock transcription factor, Y-linked isoform 2	-	20893325	20935601	3.1814	4.31306
ASHGA5P046764	0.00998035	0.0405413	2.19111	down	noncoding	uc022coe.1	BC062752	UCSC_knowngene	1125	chrY	-	20934593	20981392	CATGTTTTCACTTGAGGGCTTAACAACTTGAGTGGTTTTTCACAATAAGCACATTCTTAA	exon sense-overlapping	NM_033108	HSFY1	heat shock transcription factor, Y-linked isoform 1	-	20933699	20935604	3.1814	4.31306
ASHGA5P046764	0.00998035	0.0405413	2.19111	down	noncoding	uc022coe.1	BC062752	UCSC_knowngene	1125	chrY	-	20934593	20981392	CATGTTTTCACTTGAGGGCTTAACAACTTGAGTGGTTTTTCACAATAAGCACATTCTTAA	exon sense-overlapping	NM_152584	HSFY1	heat shock transcription factor, Y-linked isoform 2	-	20893325	20935601	3.1814	4.31306
ASHGA5P046764	0.00998035	0.0405413	2.19111	down	noncoding	uc022coe.1	BC062752	UCSC_knowngene	1125	chrY	-	20934593	20981392	CATGTTTTCACTTGAGGGCTTAACAACTTGAGTGGTTTTTCACAATAAGCACATTCTTAA	exon sense-overlapping	NM_153716	HSFY2	heat shock transcription factor, Y-linked isoform 1	-	20933700	20935621	3.1814	4.31306
ASHGA5P038850	1.64685e-05	0.00124472	2.19026	down	noncoding	ENST00000425185	RP4-665J23.2	GENCODE	580	chr1	+	91317315	91319843	CCCTGTGAACTACGGAGAGACCCCAGAGGAGAGATTTCCTTATTGTGTAAACACAAATCA	intergenic							4.22269	5.35379
ASHGA5P028361	0.0416231	0.0919958	2.18762	down	noncoding	uc021ogr.1	BC036435	UCSC_knowngene	1579	chr1	-	16860349	16862144	CTCGAGAGTGTCTCTCTCATTAAAAGCTCCACCAAATATTTGAAATATCTCAACCAGAAA	bidirectional	ENST00000357301	AL355149.1		+	16862254	16864669	3.24983	4.37919
ASHGA5P055254	0.0137429	0.0489089	2.18747	down	noncoding	ENST00000489396	RP11-320N7.1	pseudogene	507	chr12	-	4218874	4219381	ATTGTTAATGAGTCACAGAAACTGGCCACCTCTGTCTCTCTCCCATATGATGGGGAAGAT								7.3025	8.43177
ASHGA5P045724	0.0202018	0.061059	2.18715	down	noncoding	ENST00000450779	RP11-95K23.5	GENCODE	1126	chr9	+	41285356	41287306	CAGTGCCAAGAGTTATAAGAACAACTGCTTTATTTCACTCCTATCTCTGTGAATACAAAA	intergenic							3.04776	4.17681
ASHGA5P019266	0.000137631	0.00410371	2.18634	down	noncoding	NR_045925	PGAP2	RefSeq	1623	chr11	+	3819048	3847601	ACACTGTGGGCCATCCACGAAAATGCTTTCATTGTGTTCATTGCCTCATCCCTCGGGCAC	exon sense-overlapping	NM_001145438	PGAP2	post-GPI attachment to proteins factor 2 isoform 2	+	3819048	3847601	3.38387	4.51239
ASHGA5P019266	0.000137631	0.00410371	2.18634	down	noncoding	NR_045925	PGAP2	RefSeq	1623	chr11	+	3819048	3847601	ACACTGTGGGCCATCCACGAAAATGCTTTCATTGTGTTCATTGCCTCATCCCTCGGGCAC	exon sense-overlapping	NM_001256235	PGAP2	post-GPI attachment to proteins factor 2 isoform 3	+	3818953	3847601	3.38387	4.51239
ASHGA5P019266	0.000137631	0.00410371	2.18634	down	noncoding	NR_045925	PGAP2	RefSeq	1623	chr11	+	3819048	3847601	ACACTGTGGGCCATCCACGAAAATGCTTTCATTGTGTTCATTGCCTCATCCCTCGGGCAC	exon sense-overlapping	NM_001256236	PGAP2	post-GPI attachment to proteins factor 2 isoform 4	+	3819048	3847601	3.38387	4.51239
ASHGA5P019266	0.000137631	0.00410371	2.18634	down	noncoding	NR_045925	PGAP2	RefSeq	1623	chr11	+	3819048	3847601	ACACTGTGGGCCATCCACGAAAATGCTTTCATTGTGTTCATTGCCTCATCCCTCGGGCAC	exon sense-overlapping	NM_001256237	PGAP2	post-GPI attachment to proteins factor 2 isoform 5	+	3819048	3847601	3.38387	4.51239
ASHGA5P019266	0.000137631	0.00410371	2.18634	down	noncoding	NR_045925	PGAP2	RefSeq	1623	chr11	+	3819048	3847601	ACACTGTGGGCCATCCACGAAAATGCTTTCATTGTGTTCATTGCCTCATCCCTCGGGCAC	exon sense-overlapping	NM_001256238	PGAP2	post-GPI attachment to proteins factor 2 isoform 6	+	3829239	3847601	3.38387	4.51239
ASHGA5P019266	0.000137631	0.00410371	2.18634	down	noncoding	NR_045925	PGAP2	RefSeq	1623	chr11	+	3819048	3847601	ACACTGTGGGCCATCCACGAAAATGCTTTCATTGTGTTCATTGCCTCATCCCTCGGGCAC	exon sense-overlapping	NM_001256239	PGAP2	post-GPI attachment to proteins factor 2 isoform 7	+	3829765	3847601	3.38387	4.51239
ASHGA5P019266	0.000137631	0.00410371	2.18634	down	noncoding	NR_045925	PGAP2	RefSeq	1623	chr11	+	3819048	3847601	ACACTGTGGGCCATCCACGAAAATGCTTTCATTGTGTTCATTGCCTCATCCCTCGGGCAC	exon sense-overlapping	NM_001256240	PGAP2	post-GPI attachment to proteins factor 2 isoform 8	+	3829765	3847601	3.38387	4.51239
ASHGA5P019266	0.000137631	0.00410371	2.18634	down	noncoding	NR_045925	PGAP2	RefSeq	1623	chr11	+	3819048	3847601	ACACTGTGGGCCATCCACGAAAATGCTTTCATTGTGTTCATTGCCTCATCCCTCGGGCAC	exon sense-overlapping	NM_014489	PGAP2	post-GPI attachment to proteins factor 2 isoform 1	+	3829765	3847601	3.38387	4.51239
ASHGA5P043935	0.0023988	0.0181009	2.18088	down	noncoding	ENST00000447529	AC078842.4	GENCODE	1835	chr7	+	137003338	137011700	TCCACCAGAACTCACACTTTCTTCCTTATATTTTTCCATCTTTAAACACAAGTTAGGAGA	intronic antisense	NM_002825	PTN	pleiotrophin precursor	-	136912091	137028546	3.08837	4.21328
ASHGA5P035194	0.0348936	0.0827559	2.18011	down	noncoding	ENST00000428188	AC007271.3	GENCODE	382	chr2	-	102789080	102798568	GAGAGAGAGAGTAAATAAACTTGTGTAAGTTAATTGCATCAACTACAAATAAGACCTGTA	natural antisense	NM_000877	IL1R1	interleukin-1 receptor type 1 precursor	+	102770401	102796334	3.75	4.8744
ASHGA5P054632	0.00201242	0.016598	2.17931	down	noncoding	ENST00000435244	RP11-304M2.2	GENCODE	1441	chr11	-	130182	133779	ATGCCCAACTAATATTTGGAATTTTCGTATACGTGGATTCCAGAGGGGTGACAGCGAAAC	intergenic							4.25465	5.37852
ASHGA5P000029	0.00173775	0.0153928	2.17926	down	noncoding	AK021458		NRED	1459	chr9	+	139011794	139013253	TAAGGACTATTAGAGACAAACTAACCAAAGATAATTCTCCCCTCCCACGTGGCTCGTGCT	intergenic							9.71357	10.8374
ASHGA5P030418	0.00592701	0.029914	2.17584	down	noncoding	ENST00000561999	RP11-1000B6.3	GENCODE	366	chr15	+	32828914	32867844	TGAGGTCGTGACAAGTCACAGCTAACTTGCCCTCCGCGCCATTCCACGCCACCAGGAAGC	intergenic							6.82774	7.94931
ASHGA5P000081	0.0109535	0.0429614	2.17354	down	noncoding	AW449870		LincRNAs identified by Khalil et al	388	chr9	+	73077075	73165409	AGCTTAACAGTTTTTCACCTTCTCCTCTTTTTCCTGCCTGGAACATGAATGTGATGACTG	intronic antisense	ENST00000357533	TRPM3	transient receptor potential cation channel, subfamily M, member 3 [Source:HGNC Symbol;Acc:17992]	-	73150859	74061751	4.80642	5.92646
ASHGA5P000081	0.0109535	0.0429614	2.17354	down	noncoding	AW449870		LincRNAs identified by Khalil et al	388	chr9	+	73077075	73165409	AGCTTAACAGTTTTTCACCTTCTCCTCTTTTTCCTGCCTGGAACATGAATGTGATGACTG	intronic antisense	ENST00000358082	TRPM3	transient receptor potential cation channel, subfamily M, member 3 [Source:HGNC Symbol;Acc:17992]	-	73150868	73477826	4.80642	5.92646
ASHGA5P000081	0.0109535	0.0429614	2.17354	down	noncoding	AW449870		LincRNAs identified by Khalil et al	388	chr9	+	73077075	73165409	AGCTTAACAGTTTTTCACCTTCTCCTCTTTTTCCTGCCTGGAACATGAATGTGATGACTG	intronic antisense	ENST00000360823	TRPM3	transient receptor potential cation channel, subfamily M, member 3 [Source:HGNC Symbol;Acc:17992]	-	73149967	73483974	4.80642	5.92646
ASHGA5P000081	0.0109535	0.0429614	2.17354	down	noncoding	AW449870		LincRNAs identified by Khalil et al	388	chr9	+	73077075	73165409	AGCTTAACAGTTTTTCACCTTCTCCTCTTTTTCCTGCCTGGAACATGAATGTGATGACTG	intronic antisense	ENST00000377105	TRPM3	transient receptor potential cation channel, subfamily M, member 3 [Source:HGNC Symbol;Acc:17992]	-	73149967	73483974	4.80642	5.92646
ASHGA5P000081	0.0109535	0.0429614	2.17354	down	noncoding	AW449870		LincRNAs identified by Khalil et al	388	chr9	+	73077075	73165409	AGCTTAACAGTTTTTCACCTTCTCCTCTTTTTCCTGCCTGGAACATGAATGTGATGACTG	intronic antisense	ENST00000377106	TRPM3	transient receptor potential cation channel, subfamily M, member 3 [Source:HGNC Symbol;Acc:17992]	-	73149967	73483974	4.80642	5.92646
ASHGA5P000081	0.0109535	0.0429614	2.17354	down	noncoding	AW449870		LincRNAs identified by Khalil et al	388	chr9	+	73077075	73165409	AGCTTAACAGTTTTTCACCTTCTCCTCTTTTTCCTGCCTGGAACATGAATGTGATGACTG	intronic antisense	ENST00000377110	TRPM3	transient receptor potential cation channel, subfamily M, member 3 [Source:HGNC Symbol;Acc:17992]	-	73149967	73736514	4.80642	5.92646
ASHGA5P000081	0.0109535	0.0429614	2.17354	down	noncoding	AW449870		LincRNAs identified by Khalil et al	388	chr9	+	73077075	73165409	AGCTTAACAGTTTTTCACCTTCTCCTCTTTTTCCTGCCTGGAACATGAATGTGATGACTG	intronic antisense	ENST00000377111	TRPM3	transient receptor potential cation channel, subfamily M, member 3 [Source:HGNC Symbol;Acc:17992]	-	73149948	73736514	4.80642	5.92646
ASHGA5P000081	0.0109535	0.0429614	2.17354	down	noncoding	AW449870		LincRNAs identified by Khalil et al	388	chr9	+	73077075	73165409	AGCTTAACAGTTTTTCACCTTCTCCTCTTTTTCCTGCCTGGAACATGAATGTGATGACTG	intronic antisense	ENST00000396280	TRPM3	transient receptor potential cation channel, subfamily M, member 3 [Source:HGNC Symbol;Acc:17992]	-	73150868	73461508	4.80642	5.92646
ASHGA5P000081	0.0109535	0.0429614	2.17354	down	noncoding	AW449870		LincRNAs identified by Khalil et al	388	chr9	+	73077075	73165409	AGCTTAACAGTTTTTCACCTTCTCCTCTTTTTCCTGCCTGGAACATGAATGTGATGACTG	intronic antisense	ENST00000396285	TRPM3	transient receptor potential cation channel, subfamily M, member 3 [Source:HGNC Symbol;Acc:17992]	-	73150868	73477826	4.80642	5.92646
ASHGA5P000081	0.0109535	0.0429614	2.17354	down	noncoding	AW449870		LincRNAs identified by Khalil et al	388	chr9	+	73077075	73165409	AGCTTAACAGTTTTTCACCTTCTCCTCTTTTTCCTGCCTGGAACATGAATGTGATGACTG	intronic antisense	ENST00000396292	TRPM3	transient receptor potential cation channel, subfamily M, member 3 [Source:HGNC Symbol;Acc:17992]	-	73150868	73477826	4.80642	5.92646
ASHGA5P000081	0.0109535	0.0429614	2.17354	down	noncoding	AW449870		LincRNAs identified by Khalil et al	388	chr9	+	73077075	73165409	AGCTTAACAGTTTTTCACCTTCTCCTCTTTTTCCTGCCTGGAACATGAATGTGATGACTG	intronic antisense	ENST00000408909	TRPM3	transient receptor potential cation channel, subfamily M, member 3 [Source:HGNC Symbol;Acc:17992]	-	73150868	73477826	4.80642	5.92646
ASHGA5P000081	0.0109535	0.0429614	2.17354	down	noncoding	AW449870		LincRNAs identified by Khalil et al	388	chr9	+	73077075	73165409	AGCTTAACAGTTTTTCACCTTCTCCTCTTTTTCCTGCCTGGAACATGAATGTGATGACTG	intronic antisense	ENST00000423814	TRPM3	transient receptor potential cation channel, subfamily M, member 3 [Source:HGNC Symbol;Acc:17992]	-	73150868	74061751	4.80642	5.92646
ASHGA5P000081	0.0109535	0.0429614	2.17354	down	noncoding	AW449870		LincRNAs identified by Khalil et al	388	chr9	+	73077075	73165409	AGCTTAACAGTTTTTCACCTTCTCCTCTTTTTCCTGCCTGGAACATGAATGTGATGACTG	intronic antisense	NM_001007471	TRPM3	transient receptor potential cation channel subfamily M member 3 isoform k	-	73149965	73736514	4.80642	5.92646
ASHGA5P000081	0.0109535	0.0429614	2.17354	down	noncoding	AW449870		LincRNAs identified by Khalil et al	388	chr9	+	73077075	73165409	AGCTTAACAGTTTTTCACCTTCTCCTCTTTTTCCTGCCTGGAACATGAATGTGATGACTG	intronic antisense	NM_020952	TRPM3	transient receptor potential cation channel subfamily M member 3 isoform a	-	73149965	73483974	4.80642	5.92646
ASHGA5P000081	0.0109535	0.0429614	2.17354	down	noncoding	AW449870		LincRNAs identified by Khalil et al	388	chr9	+	73077075	73165409	AGCTTAACAGTTTTTCACCTTCTCCTCTTTTTCCTGCCTGGAACATGAATGTGATGACTG	intronic antisense	NM_024971	TRPM3	transient receptor potential cation channel subfamily M member 3 isoform b	-	73149965	73483974	4.80642	5.92646
ASHGA5P000081	0.0109535	0.0429614	2.17354	down	noncoding	AW449870		LincRNAs identified by Khalil et al	388	chr9	+	73077075	73165409	AGCTTAACAGTTTTTCACCTTCTCCTCTTTTTCCTGCCTGGAACATGAATGTGATGACTG	intronic antisense	NM_206944	TRPM3	transient receptor potential cation channel subfamily M member 3 isoform d	-	73149965	73483974	4.80642	5.92646
ASHGA5P000081	0.0109535	0.0429614	2.17354	down	noncoding	AW449870		LincRNAs identified by Khalil et al	388	chr9	+	73077075	73165409	AGCTTAACAGTTTTTCACCTTCTCCTCTTTTTCCTGCCTGGAACATGAATGTGATGACTG	intronic antisense	NM_206945	TRPM3	transient receptor potential cation channel subfamily M member 3 isoform e	-	73149965	73483974	4.80642	5.92646
ASHGA5P000081	0.0109535	0.0429614	2.17354	down	noncoding	AW449870		LincRNAs identified by Khalil et al	388	chr9	+	73077075	73165409	AGCTTAACAGTTTTTCACCTTCTCCTCTTTTTCCTGCCTGGAACATGAATGTGATGACTG	intronic antisense	NM_206946	TRPM3	transient receptor potential cation channel subfamily M member 3 isoform f	-	73149965	73483974	4.80642	5.92646
ASHGA5P000081	0.0109535	0.0429614	2.17354	down	noncoding	AW449870		LincRNAs identified by Khalil et al	388	chr9	+	73077075	73165409	AGCTTAACAGTTTTTCACCTTCTCCTCTTTTTCCTGCCTGGAACATGAATGTGATGACTG	intronic antisense	NM_206947	TRPM3	transient receptor potential cation channel subfamily M member 3 isoform g	-	73149965	73483974	4.80642	5.92646
ASHGA5P032884	0.00501742	0.027422	2.17334	down	noncoding	NR_027177	C17orf76-AS1	RefSeq	828	chr17	+	16342300	16373962	TTCATCTAAAGTAGGTCATGAGACCCCTGAGCTTAAAACGGAGTGATCGGCTTTGGAGAA	intronic antisense	NM_001113567	FAM211A	leucine-rich repeat-containing protein FAM211A isoform 1	-	16345318	16395505	3.37708	4.49699
ASHGA5P032884	0.00501742	0.027422	2.17334	down	noncoding	NR_027177	C17orf76-AS1	RefSeq	828	chr17	+	16342300	16373962	TTCATCTAAAGTAGGTCATGAGACCCCTGAGCTTAAAACGGAGTGATCGGCTTTGGAGAA	intronic antisense	NM_207387	FAM211A	leucine-rich repeat-containing protein FAM211A isoform 2	-	16345318	16395505	3.37708	4.49699
ASHGA5P045996	0.0292111	0.0754074	2.17174	down	noncoding	ENST00000436710	RP11-65J3.1	GENCODE	901	chr9	+	132096184	132109678	TCTTGGTTGCTCTCATCACTGTAATGATCTAAAACACACGTCTGCTCATGAGACCCGCAT	intergenic							4.56329	5.68214
ASHGA5P033574	0.0146803	0.0511841	2.17106	down	noncoding	ENST00000434639	RP11-261C10.3	GENCODE	126	chr1	-	243220313	243220723	TCCCAGCCTTCTCTCCAGGCCCTGAACTTTCTCAAGTCGACCTCACCAGGCCCAGCTCAT	intergenic							5.96118	7.07958
ASHGA5P016257	0.0115342	0.0441315	2.16972	down	noncoding	ENST00000428649	FAM75C2	pseudogene	3761	chr9	-	90744219	90749900	TGTGACAACCCACCCTCACCATCGCCTAAGAAGAGAAAGCGTCATCTTGTCTCCCAGCGT								6.87036	7.98787
ASHGA5P031556	0.0160781	0.0540291	2.16635	down	noncoding	ENST00000566734	RP11-1021N1.2	GENCODE	549	chr16	+	15506576	15507125	GATTTTGATGTTGCATTTGGCTACATTTAATCCACTTTCACCCATAAGGTTTAGCATCTA	intron sense-overlapping	ENST00000568766	RP11-1021N1.1	Uncharacterized protein [Source:UniProtKB/TrEMBL;Acc:H3BMD7]	+	15489610	15609205	3.64006	4.75533
ASHGA5P049407	0.00739451	0.0336715	2.16374	down	noncoding	NR_028514	PITPNA-AS1	RefSeq	570	chr17	+	1420212	1421390	TTGTCTCTTCGCCGCCGCCGCAGCCTCTGCCCCACTCGTGAGGGATCCGAGGGCTCCGTC	natural antisense	NM_006224	PITPNA	phosphatidylinositol transfer protein alpha isoform	-	1421282	1466110	10.2732	11.3868
ASHGA5P028958	0.0016572	0.0150404	2.16341	down	noncoding	ENST00000458001	GAS6-AS1	GENCODE	773	chr13	+	114518602	114542321	AGGTCTACACTGAAGGACGGTCAGAGGTGAAATCTCCCCCCGGCCTTTCAATCAGTGGGT	natural antisense	NM_000820	GAS6	growth arrest-specific protein 6 isoform 1 precursor	-	114523521	114567046	10.0681	11.1814
ASHGA5P028958	0.0016572	0.0150404	2.16341	down	noncoding	ENST00000458001	GAS6-AS1	GENCODE	773	chr13	+	114518602	114542321	AGGTCTACACTGAAGGACGGTCAGAGGTGAAATCTCCCCCCGGCCTTTCAATCAGTGGGT	natural antisense	NM_001143945	GAS6	growth arrest-specific protein 6 isoform 2	-	114523521	114539017	10.0681	11.1814
ASHGA5P028958	0.0016572	0.0150404	2.16341	down	noncoding	ENST00000458001	GAS6-AS1	GENCODE	773	chr13	+	114518602	114542321	AGGTCTACACTGAAGGACGGTCAGAGGTGAAATCTCCCCCCGGCCTTTCAATCAGTGGGT	natural antisense	NM_001143946	GAS6	growth arrest-specific protein 6 isoform 3	-	114523521	114536714	10.0681	11.1814
ASHGA5P049529	0.00689752	0.0326569	2.16216	down	noncoding	ENST00000584481	AC022596.6	GENCODE	715	chr17	-	16721305	16722677	ATGTATCTAATGACCCTGCCCTTTTCTGTCTTCACAGCCTCTCCTCCTCCCAGTTCTCCT	intergenic							7.97791	9.09038
ASHGA5P028961	0.00182241	0.0157181	2.16091	down	noncoding	ENST00000449453	RP11-199F6.4	GENCODE	344	chr13	+	114580580	114582349	GCTGGCAGAAACTGAACCTGGATTATGAGTGCTGGCAAAAATGTAAACAAAATTATTAAA	intergenic							3.38875	4.50039
ASHGA5P055926	0.000200002	0.00498438	2.15997	down	noncoding	NR_023921	DHRS4-AS1	RefSeq	3038	chr14	-	24407939	24423392	TGTGCATGGATCAGACCAGCAAGTATGGGTTCCACTCTTCCCAGGGGCGGTGACAGAGTA	natural antisense	NM_021004	DHRS4	dehydrogenase/reductase SDR family member 4	+	24422964	24438488	3.72553	4.83654
ASHGA5P049782	7.10041e-05	0.00282605	2.1589	down	noncoding	ENST00000578022	RP11-112H10.4	GENCODE	725	chr17	+	56602900	56634338	GAGTGAGTTTAATTTCCCAAGGCAAGTCTGCCTGATTGTCCTCTCCTTTCCTTACCTTCA	natural antisense	NM_001038704	C17orf47	uncharacterized protein C17orf47	-	56618947	56621733	3.6423	4.7526
ASHGA5P049782	7.10041e-05	0.00282605	2.1589	down	noncoding	ENST00000578022	RP11-112H10.4	GENCODE	725	chr17	+	56602900	56634338	GAGTGAGTTTAATTTCCCAAGGCAAGTCTGCCTGATTGTCCTCTCCTTTCCTTACCTTCA	natural antisense	NM_001198713	SEPT4	septin-4 isoform 4	-	56597610	56618179	3.6423	4.7526
ASHGA5P049782	7.10041e-05	0.00282605	2.1589	down	noncoding	ENST00000578022	RP11-112H10.4	GENCODE	725	chr17	+	56602900	56634338	GAGTGAGTTTAATTTCCCAAGGCAAGTCTGCCTGATTGTCCTCTCCTTTCCTTACCTTCA	natural antisense	NM_001201457	TEX14	inactive serine/threonine-protein kinase TEX14 isoform c	-	56634037	56769416	3.6423	4.7526
ASHGA5P049782	7.10041e-05	0.00282605	2.1589	down	noncoding	ENST00000578022	RP11-112H10.4	GENCODE	725	chr17	+	56602900	56634338	GAGTGAGTTTAATTTCCCAAGGCAAGTCTGCCTGATTGTCCTCTCCTTTCCTTACCTTCA	natural antisense	NM_001256782	SEPT4	septin-4 isoform 5	-	56597610	56618179	3.6423	4.7526
ASHGA5P049782	7.10041e-05	0.00282605	2.1589	down	noncoding	ENST00000578022	RP11-112H10.4	GENCODE	725	chr17	+	56602900	56634338	GAGTGAGTTTAATTTCCCAAGGCAAGTCTGCCTGATTGTCCTCTCCTTTCCTTACCTTCA	natural antisense	NM_001256822	SEPT4	septin-4 isoform 6	-	56597610	56605408	3.6423	4.7526
ASHGA5P049782	7.10041e-05	0.00282605	2.1589	down	noncoding	ENST00000578022	RP11-112H10.4	GENCODE	725	chr17	+	56602900	56634338	GAGTGAGTTTAATTTCCCAAGGCAAGTCTGCCTGATTGTCCTCTCCTTTCCTTACCTTCA	natural antisense	NM_004574	SEPT4	septin-4 isoform 1	-	56597610	56606778	3.6423	4.7526
ASHGA5P049782	7.10041e-05	0.00282605	2.1589	down	noncoding	ENST00000578022	RP11-112H10.4	GENCODE	725	chr17	+	56602900	56634338	GAGTGAGTTTAATTTCCCAAGGCAAGTCTGCCTGATTGTCCTCTCCTTTCCTTACCTTCA	natural antisense	NM_031272	TEX14	inactive serine/threonine-protein kinase TEX14 isoform b	-	56634037	56769416	3.6423	4.7526
ASHGA5P049782	7.10041e-05	0.00282605	2.1589	down	noncoding	ENST00000578022	RP11-112H10.4	GENCODE	725	chr17	+	56602900	56634338	GAGTGAGTTTAATTTCCCAAGGCAAGTCTGCCTGATTGTCCTCTCCTTTCCTTACCTTCA	natural antisense	NM_080415	SEPT4	septin-4 isoform 2	-	56597610	56609443	3.6423	4.7526
ASHGA5P049782	7.10041e-05	0.00282605	2.1589	down	noncoding	ENST00000578022	RP11-112H10.4	GENCODE	725	chr17	+	56602900	56634338	GAGTGAGTTTAATTTCCCAAGGCAAGTCTGCCTGATTGTCCTCTCCTTTCCTTACCTTCA	natural antisense	NM_080416	SEPT4	septin-4 isoform 3	-	56597610	56609443	3.6423	4.7526
ASHGA5P049782	7.10041e-05	0.00282605	2.1589	down	noncoding	ENST00000578022	RP11-112H10.4	GENCODE	725	chr17	+	56602900	56634338	GAGTGAGTTTAATTTCCCAAGGCAAGTCTGCCTGATTGTCCTCTCCTTTCCTTACCTTCA	natural antisense	NM_198393	TEX14	inactive serine/threonine-protein kinase TEX14 isoform a	-	56634037	56769416	3.6423	4.7526
ASHGA5P058195	0.00198397	0.0164664	2.15732	down	noncoding	TCONS_00028117	XLOC_013473	LincRNAs identified by Cabili et al	1290	chr20	+	18774734	18776448	GGCTTGAAAGTTTAGTTCCAGGATCCACACTCCTCCACCATAGTCAGGAGATTCAGGGAA	intergenic							4.02582	5.13506
ASHGA5P037447	0.00707749	0.0330831	2.15711	down	noncoding	TCONS_00024486	XLOC_011805	LincRNAs identified by Cabili et al	503	chr16	+	84818676	84829057	TTCTTCCTCTGCTTTAAAAGACTGAAAGCCTCCCTGTAAGGTGCTGATTGCCTTCCAGAT	intergenic							3.83117	4.94027
ASHGA5P042877	0.0256954	0.0702453	2.15567	down	noncoding	ENST00000420313	GRIFIN	GENCODE	579	chr7	-	2514359	2516017	GGTCTGTGGTCCTGTGTGCTCCTCGCAGCTCCACCTTCAATAAACTCTGAGAAGGCTGCA	intergenic							6.27322	7.38136
ASHGA5P039623	0.000858876	0.010894	2.15503	down	noncoding	ENST00000561977	RP11-308D13.3	GENCODE	1098	chr4	-	140539289	140544386	TGAGGAATACGGTCGTGTCTGTTAAACTAATTGTAGCTGTTCACTCCACTATATAATTTT	intergenic							3.02843	4.13613
ASHGA5P017374	0.00021881	0.00514705	2.15217	down	noncoding	ENST00000440800	RP11-616M22.6	GENCODE	1090	chr16	-	1310952	1312960	TGATCTGAGCAATGTCAGGACGGTCAAGCTCTCCCCGGTCTCGCTGGAGCTCACCCCGAA	intergenic							6.28112	7.38691
ASHGA5P040270	0.0018281	0.0157248	2.15161	down	noncoding	ENST00000507776	RP11-696F12.1	GENCODE	421	chr4	+	187981252	187982084	GTGATTGTCACGCTTGCCTGATTACTCCTTCCTTTGGGCTCCCATAGCAATTTGTACATT	intergenic							4.85493	5.96034
ASHGA5P016101	0.00873628	0.037225	2.15107	down	noncoding	NR_038345	MAGI2-AS3	RefSeq	918	chr7	+	79082272	79100524	CCTCCCCCAGTAATGTCTTACAATAACAGAATGCAGGAGAGCACATATCAATGAAGAAAA	natural antisense	NM_012301	MAGI2	membrane-associated guanylate kinase, WW and PDZ domain-containing protein 2	-	77646373	79082890	7.65625	8.7613
ASHGA5P041073	0.0337339	0.0813868	2.15102	down	noncoding	ENST00000512498	RP11-159F24.6	GENCODE	572	chr5	+	43511159	43521913	CTCCTGCAACTGTCTGGAATTTCTTCTCTCTCCAATCCATCTCTAGTATTGATGACATAG	intronic antisense	NM_198566	C5orf34	uncharacterized protein C5orf34	-	43486802	43515273	4.87	5.97502
ASHGA5P047179	0.00564375	0.0292712	2.15038	down	noncoding	TCONS_00014912	XLOC_006978	LincRNAs identified by Cabili et al	388	chr8	-	2387146	2415857	ATGTCACTGGTTTTCTGCTGCCCCTTTTGGCTCCATTCCACGTGCGTCCATACAAACCGG	intergenic							7.23702	8.34161
ASHGA5P055632	0.0108519	0.0427022	2.14987	down	noncoding	ENST00000548457	RP11-1028N23.2	GENCODE	540	chr12	+	116014480	116015420	CAAAAGCAAGGTCAGCCTGTACTGAGTATGAGCACACACACATCCCATGTTCTATTTCTT	intergenic							4.61798	5.72224
ASHGA5P058860	0.00562392	0.0292488	2.14925	down	noncoding	uc.260-	uc.260	UCR	231	chr9	-	81472423	81472654	TTCATTTTTCTCTATCTTCCAGCCATCCAGCTGGCATCTATAATGGATATCCTGGGGGCT	intergenic							6.5801	7.68393
ASHGA5P027418	0.000883168	0.0109817	2.14891	down	noncoding	ENST00000548900	RP11-1143G9.4	GENCODE	599	chr12	-	69747272	69748005	CATCAGATGCCTTCATCAGCTGGTATTTTGCCTAAGATCTATTTAAGATAACCTTTTCTT	natural antisense	NM_000239	LYZ	lysozyme C precursor	+	69742133	69748013	5.94998	7.05358
ASHGA5P058596	0.0021374	0.0170936	2.14708	down	noncoding	uc010oba.1	NPPA-AS1	UCSC_knowngene	934	chr1	+	11900375	11907674	CCTACGGGTGATGAACACTCTTCCTGATCCTCTCCTCTAGAATTCATCTCCTCCTGCTAG	exon sense-overlapping	NM_001256959	CLCN6	chloride transport protein 6 isoform 2	+	11866152	11903201	5.27015	6.37252
ASHGA5P058596	0.0021374	0.0170936	2.14708	down	noncoding	uc010oba.1	NPPA-AS1	UCSC_knowngene	934	chr1	+	11900375	11907674	CCTACGGGTGATGAACACTCTTCCTGATCCTCTCCTCTAGAATTCATCTCCTCCTGCTAG	exon sense-overlapping	NM_001286	CLCN6	chloride transport protein 6 isoform 1	+	11866152	11903201	5.27015	6.37252
ASHGA5P058596	0.0021374	0.0170936	2.14708	down	noncoding	uc010oba.1	NPPA-AS1	UCSC_knowngene	934	chr1	+	11900375	11907674	CCTACGGGTGATGAACACTCTTCCTGATCCTCTCCTCTAGAATTCATCTCCTCCTGCTAG	natural antisense	NM_006172	NPPA	natriuretic peptides A preproprotein	-	11905766	11907840	5.27015	6.37252
ASHGA5P057750	0.0264468	0.0713001	2.14494	down	noncoding	TCONS_00021761	XLOC_010355	LincRNAs identified by Cabili et al	338	chr13	+	40637746	40638543	CACACCCAGAGACCCTCCTCTTCCATATAAAATTAAATATAGACATCAAGATCTAAATGT	intergenic							6.87341	7.97435
ASHGA5P015727	0.00215152	0.0171045	2.14367	down	noncoding	ENST00000422996	AC064875.2	GENCODE	582	chr2	-	13142761	13147138	GCCTTTCTACTTTCTGATTGCAGCAATATACCCTTCATTTGACCCAGTTTATTCATTCAA	intergenic							3.11663	4.21671
ASHGA5P054922	0.0342847	0.0820928	2.13733	down	noncoding	uc001nvt.3	SNHG1	UCSC_knowngene	2769	chr11	-	62619459	62623357	GTGGAAGTTGCTACGGGGATGATTTTACGAACTGAACTCTCTCTTTCTGATGGATTAGTG	bidirectional	NM_001012662	SLC3A2	4F2 cell-surface antigen heavy chain isoform b	+	62623483	62656355	7.38606	8.48188
ASHGA5P054922	0.0342847	0.0820928	2.13733	down	noncoding	uc001nvt.3	SNHG1	UCSC_knowngene	2769	chr11	-	62619459	62623357	GTGGAAGTTGCTACGGGGATGATTTTACGAACTGAACTCTCTCTTTCTGATGGATTAGTG	bidirectional	NM_001012664	SLC3A2	4F2 cell-surface antigen heavy chain isoform e	+	62623483	62656355	7.38606	8.48188
ASHGA5P054922	0.0342847	0.0820928	2.13733	down	noncoding	uc001nvt.3	SNHG1	UCSC_knowngene	2769	chr11	-	62619459	62623357	GTGGAAGTTGCTACGGGGATGATTTTACGAACTGAACTCTCTCTTTCTGATGGATTAGTG	bidirectional	NM_002394	SLC3A2	4F2 cell-surface antigen heavy chain isoform c	+	62623483	62656355	7.38606	8.48188
ASHGA5P047220	0.0021926	0.0172951	2.13677	down	noncoding	ENST00000455525	RP11-433J20.2	GENCODE	633	chr10	+	4067131	4070586	GGAACATCATCCCTCATCACTGGAAGAAATTACAAGGATTGTGTAAACAATTACAAGTAT	intergenic							3.15713	4.25257
ASHGA5P033580	0.0137711	0.0489337	2.13597	down	noncoding	ENST00000424800	RP11-261C10.3	GENCODE	524	chr1	-	243220532	243221149	ACTTGACCACTGTGAAGACTGGTGTGGGAAGGGTCGTTTCGGATGCACTTGAGCAGGGGT	intergenic							4.05165	5.14654
ASHGA5P049976	0.0169999	0.0557236	2.13482	down	noncoding	ENST00000581653	RP11-454P7.3	pseudogene	237	chr18	-	15197537	15197774	GAGAAGAAGGAGGGCGGTGGTGGGGGTGATGCGGGAGCTGCGGAGGGTGGCTCAGGGGTC								6.20845	7.30257
ASHGA5P035540	0.0109172	0.0428554	2.13478	down	noncoding	ENST00000421964	AC083900.1	GENCODE	469	chr2	-	208733305	208734639	CCTTCCCCTTGATGTAAATCTCAAGTGTTTAAAAGGAGGAATGAGTCTAAATCATAGAAA	intron sense-overlapping	NM_001080475	PLEKHM3	pleckstrin homology domain-containing family M member 3	-	208686011	208890284	4.90529	5.99937
ASHGA5P040257	0.00101172	0.0116322	2.1339	down	noncoding	TCONS_00023109	XLOC_011034	LincRNAs identified by Cabili et al	516	chr14	-	55695907	55696519	TGGGTACTCTGCTGGAAAGTTGATTTCTATTCTGAAGGCCCCCTTATCATATGGAGGGTT	intergenic							7.98243	9.07592
ASHGA5P020966	0.0184828	0.0583465	2.13374	down	noncoding	ENST00000522768	RP11-156K13.1	GENCODE	510	chr8	+	17658853	17718578	CCGGGCCGCGTCAGTCAACGAACATTCGAGATCCTGTCATGTGTCAGACACTGTGCGGAG	bidirectional	NM_001001924	MTUS1	microtubule-associated tumor suppressor 1 isoform 1	-	17501302	17658426	2.98055	4.07394
ASHGA5P020966	0.0184828	0.0583465	2.13374	down	noncoding	ENST00000522768	RP11-156K13.1	GENCODE	510	chr8	+	17658853	17718578	CCGGGCCGCGTCAGTCAACGAACATTCGAGATCCTGTCATGTGTCAGACACTGTGCGGAG	bidirectional	NM_001001925	MTUS1	microtubule-associated tumor suppressor 1 isoform 2	-	17501302	17658426	2.98055	4.07394
ASHGA5P025972	3.15135e-05	0.00170993	2.13324	down	noncoding	NR_047618	UTY	RefSeq	6627	chrY	-	15360258	15592550	AAGTTGCTCAGCAAAATACACACACTCTACCTCATAATCATACAGACCTGAACAGCAGCA	exon sense-overlapping	NM_001258249	UTY	histone demethylase UTY isoform 4	-	15360258	15592550	3.25632	4.34937
ASHGA5P025972	3.15135e-05	0.00170993	2.13324	down	noncoding	NR_047618	UTY	RefSeq	6627	chrY	-	15360258	15592550	AAGTTGCTCAGCAAAATACACACACTCTACCTCATAATCATACAGACCTGAACAGCAGCA	exon sense-overlapping	NM_001258250	UTY	histone demethylase UTY isoform 5	-	15360258	15592550	3.25632	4.34937
ASHGA5P025972	3.15135e-05	0.00170993	2.13324	down	noncoding	NR_047618	UTY	RefSeq	6627	chrY	-	15360258	15592550	AAGTTGCTCAGCAAAATACACACACTCTACCTCATAATCATACAGACCTGAACAGCAGCA	exon sense-overlapping	NM_001258251	UTY	histone demethylase UTY isoform 6	-	15360258	15592550	3.25632	4.34937
ASHGA5P025972	3.15135e-05	0.00170993	2.13324	down	noncoding	NR_047618	UTY	RefSeq	6627	chrY	-	15360258	15592550	AAGTTGCTCAGCAAAATACACACACTCTACCTCATAATCATACAGACCTGAACAGCAGCA	exon sense-overlapping	NM_001258252	UTY	histone demethylase UTY isoform 7	-	15360258	15592550	3.25632	4.34937
ASHGA5P025972	3.15135e-05	0.00170993	2.13324	down	noncoding	NR_047618	UTY	RefSeq	6627	chrY	-	15360258	15592550	AAGTTGCTCAGCAAAATACACACACTCTACCTCATAATCATACAGACCTGAACAGCAGCA	exon sense-overlapping	NM_001258253	UTY	histone demethylase UTY isoform 8	-	15360258	15592550	3.25632	4.34937
ASHGA5P025972	3.15135e-05	0.00170993	2.13324	down	noncoding	NR_047618	UTY	RefSeq	6627	chrY	-	15360258	15592550	AAGTTGCTCAGCAAAATACACACACTCTACCTCATAATCATACAGACCTGAACAGCAGCA	exon sense-overlapping	NM_001258254	UTY	histone demethylase UTY isoform 9	-	15360258	15592550	3.25632	4.34937
ASHGA5P025972	3.15135e-05	0.00170993	2.13324	down	noncoding	NR_047618	UTY	RefSeq	6627	chrY	-	15360258	15592550	AAGTTGCTCAGCAAAATACACACACTCTACCTCATAATCATACAGACCTGAACAGCAGCA	exon sense-overlapping	NM_001258255	UTY	histone demethylase UTY isoform 10	-	15360258	15592550	3.25632	4.34937
ASHGA5P025972	3.15135e-05	0.00170993	2.13324	down	noncoding	NR_047618	UTY	RefSeq	6627	chrY	-	15360258	15592550	AAGTTGCTCAGCAAAATACACACACTCTACCTCATAATCATACAGACCTGAACAGCAGCA	exon sense-overlapping	NM_001258256	UTY	histone demethylase UTY isoform 11	-	15360258	15592550	3.25632	4.34937
ASHGA5P025972	3.15135e-05	0.00170993	2.13324	down	noncoding	NR_047618	UTY	RefSeq	6627	chrY	-	15360258	15592550	AAGTTGCTCAGCAAAATACACACACTCTACCTCATAATCATACAGACCTGAACAGCAGCA	exon sense-overlapping	NM_001258257	UTY	histone demethylase UTY isoform 12	-	15360258	15592550	3.25632	4.34937
ASHGA5P025972	3.15135e-05	0.00170993	2.13324	down	noncoding	NR_047618	UTY	RefSeq	6627	chrY	-	15360258	15592550	AAGTTGCTCAGCAAAATACACACACTCTACCTCATAATCATACAGACCTGAACAGCAGCA	exon sense-overlapping	NM_001258258	UTY	histone demethylase UTY isoform 13	-	15360258	15592550	3.25632	4.34937
ASHGA5P025972	3.15135e-05	0.00170993	2.13324	down	noncoding	NR_047618	UTY	RefSeq	6627	chrY	-	15360258	15592550	AAGTTGCTCAGCAAAATACACACACTCTACCTCATAATCATACAGACCTGAACAGCAGCA	exon sense-overlapping	NM_001258259	UTY	histone demethylase UTY isoform 14	-	15360258	15592550	3.25632	4.34937
ASHGA5P025972	3.15135e-05	0.00170993	2.13324	down	noncoding	NR_047618	UTY	RefSeq	6627	chrY	-	15360258	15592550	AAGTTGCTCAGCAAAATACACACACTCTACCTCATAATCATACAGACCTGAACAGCAGCA	exon sense-overlapping	NM_001258260	UTY	histone demethylase UTY isoform 15	-	15360258	15592550	3.25632	4.34937
ASHGA5P025972	3.15135e-05	0.00170993	2.13324	down	noncoding	NR_047618	UTY	RefSeq	6627	chrY	-	15360258	15592550	AAGTTGCTCAGCAAAATACACACACTCTACCTCATAATCATACAGACCTGAACAGCAGCA	exon sense-overlapping	NM_001258261	UTY	histone demethylase UTY isoform 16	-	15360258	15592550	3.25632	4.34937
ASHGA5P025972	3.15135e-05	0.00170993	2.13324	down	noncoding	NR_047618	UTY	RefSeq	6627	chrY	-	15360258	15592550	AAGTTGCTCAGCAAAATACACACACTCTACCTCATAATCATACAGACCTGAACAGCAGCA	exon sense-overlapping	NM_001258262	UTY	histone demethylase UTY isoform 17	-	15360258	15592550	3.25632	4.34937
ASHGA5P025972	3.15135e-05	0.00170993	2.13324	down	noncoding	NR_047618	UTY	RefSeq	6627	chrY	-	15360258	15592550	AAGTTGCTCAGCAAAATACACACACTCTACCTCATAATCATACAGACCTGAACAGCAGCA	exon sense-overlapping	NM_001258263	UTY	histone demethylase UTY isoform 18	-	15360258	15592550	3.25632	4.34937
ASHGA5P025972	3.15135e-05	0.00170993	2.13324	down	noncoding	NR_047618	UTY	RefSeq	6627	chrY	-	15360258	15592550	AAGTTGCTCAGCAAAATACACACACTCTACCTCATAATCATACAGACCTGAACAGCAGCA	exon sense-overlapping	NM_001258264	UTY	histone demethylase UTY isoform 19	-	15360258	15592550	3.25632	4.34937
ASHGA5P025972	3.15135e-05	0.00170993	2.13324	down	noncoding	NR_047618	UTY	RefSeq	6627	chrY	-	15360258	15592550	AAGTTGCTCAGCAAAATACACACACTCTACCTCATAATCATACAGACCTGAACAGCAGCA	exon sense-overlapping	NM_001258265	UTY	histone demethylase UTY isoform 20	-	15360258	15592550	3.25632	4.34937
ASHGA5P025972	3.15135e-05	0.00170993	2.13324	down	noncoding	NR_047618	UTY	RefSeq	6627	chrY	-	15360258	15592550	AAGTTGCTCAGCAAAATACACACACTCTACCTCATAATCATACAGACCTGAACAGCAGCA	exon sense-overlapping	NM_001258266	UTY	histone demethylase UTY isoform 21	-	15360258	15592550	3.25632	4.34937
ASHGA5P025972	3.15135e-05	0.00170993	2.13324	down	noncoding	NR_047618	UTY	RefSeq	6627	chrY	-	15360258	15592550	AAGTTGCTCAGCAAAATACACACACTCTACCTCATAATCATACAGACCTGAACAGCAGCA	exon sense-overlapping	NM_001258267	UTY	histone demethylase UTY isoform 22	-	15360258	15592550	3.25632	4.34937
ASHGA5P025972	3.15135e-05	0.00170993	2.13324	down	noncoding	NR_047618	UTY	RefSeq	6627	chrY	-	15360258	15592550	AAGTTGCTCAGCAAAATACACACACTCTACCTCATAATCATACAGACCTGAACAGCAGCA	exon sense-overlapping	NM_001258268	UTY	histone demethylase UTY isoform 23	-	15360258	15592550	3.25632	4.34937
ASHGA5P025972	3.15135e-05	0.00170993	2.13324	down	noncoding	NR_047618	UTY	RefSeq	6627	chrY	-	15360258	15592550	AAGTTGCTCAGCAAAATACACACACTCTACCTCATAATCATACAGACCTGAACAGCAGCA	exon sense-overlapping	NM_001258269	UTY	histone demethylase UTY isoform 24	-	15360258	15592550	3.25632	4.34937
ASHGA5P025972	3.15135e-05	0.00170993	2.13324	down	noncoding	NR_047618	UTY	RefSeq	6627	chrY	-	15360258	15592550	AAGTTGCTCAGCAAAATACACACACTCTACCTCATAATCATACAGACCTGAACAGCAGCA	exon sense-overlapping	NM_001258270	UTY	histone demethylase UTY isoform 25	-	15360258	15592550	3.25632	4.34937
ASHGA5P025972	3.15135e-05	0.00170993	2.13324	down	noncoding	NR_047618	UTY	RefSeq	6627	chrY	-	15360258	15592550	AAGTTGCTCAGCAAAATACACACACTCTACCTCATAATCATACAGACCTGAACAGCAGCA	exon sense-overlapping	NM_007125	UTY	histone demethylase UTY isoform 3	-	15360258	15592550	3.25632	4.34937
ASHGA5P025972	3.15135e-05	0.00170993	2.13324	down	noncoding	NR_047618	UTY	RefSeq	6627	chrY	-	15360258	15592550	AAGTTGCTCAGCAAAATACACACACTCTACCTCATAATCATACAGACCTGAACAGCAGCA	exon sense-overlapping	NM_182659	UTY	histone demethylase UTY isoform 2	-	15409388	15592550	3.25632	4.34937
ASHGA5P025972	3.15135e-05	0.00170993	2.13324	down	noncoding	NR_047618	UTY	RefSeq	6627	chrY	-	15360258	15592550	AAGTTGCTCAGCAAAATACACACACTCTACCTCATAATCATACAGACCTGAACAGCAGCA	exon sense-overlapping	NM_182660	UTY	histone demethylase UTY isoform 1	-	15434913	15592550	3.25632	4.34937
ASHGA5P020732	0.00310316	0.0207801	2.13237	down	noncoding	ENST00000519048	RP11-26E5.1	GENCODE	281	chr8	+	130428194	130458098	GGTTATTACATGTTTCCTTCCAAATTTCATCTTCTCCCATCTCCCTACAAACTTCAAAAG	intergenic							5.93997	7.03243
ASHGA5P022628	0.00623972	0.0308011	2.13133	down	noncoding	ENST00000559979	RP11-17L5.4	GENCODE	558	chr15	-	79529047	79576183	AGTCATTCAGGTTTTCCAGGAGAGAATCCACTTTTTGTTTTATCTGGGTCAACTCCTTCA	intronic antisense	NM_001146341	ANKRD34C	ankyrin repeat domain-containing protein 34C	+	79575145	79590581	3.80506	4.89681
ASHGA5P055522	0.00048722	0.00812415	2.13022	down	noncoding	TCONS_00029313	XLOC_014111	LincRNAs identified by Cabili et al	881	chr21	-	45587385	45588335	GAAGTCATGGCTGTGAATCCCACCCCATCACGTTTTGAATGTTGGGCAAATTAATTAATC	intergenic							7.54155	8.63255
ASHGA5P040485	0.0160445	0.0539753	2.12688	down	noncoding	ENST00000513408	GUSBP3	GENCODE	1296	chr5	-	68935285	68975086	CATTTTTCATCTATATTATGAGGCAGTAAGAGTCTTCTGTTTTTCCAAAGTTGAGACTGC	intergenic							4.1677	5.25644
ASHGA5P057522	0.0125431	0.0465312	2.12053	down	noncoding	TCONS_00018486	XLOC_008784	LincRNAs identified by Cabili et al	1866	chr10	-	38736774	38739473	CCGGTGTGAGGCAAGGGGCTCAGGCTGACCTCTGTCAGCGTGGGAGGGGCCGGTGTAAGG	intergenic							4.74623	5.83066
ASHGA5P019210	0.00446671	0.0255823	2.11753	down	noncoding	NR_046293	MSTO1	RefSeq	2531	chr1	+	155579960	155584758	ATAGGGGCAGGGAGTGCTGAGTAGTGATGGTGTCTGGAGGGTCAAATCCATTCCCAATGG	exon sense-overlapping	NM_001256532	MSTO1	protein misato homolog 1 isoform b	+	155579960	155584758	3.00469	4.08707
ASHGA5P019210	0.00446671	0.0255823	2.11753	down	noncoding	NR_046293	MSTO1	RefSeq	2531	chr1	+	155579960	155584758	ATAGGGGCAGGGAGTGCTGAGTAGTGATGGTGTCTGGAGGGTCAAATCCATTCCCAATGG	exon sense-overlapping	NM_001256533	MSTO1	protein misato homolog 1 isoform c	+	155579960	155584758	3.00469	4.08707
ASHGA5P019210	0.00446671	0.0255823	2.11753	down	noncoding	NR_046293	MSTO1	RefSeq	2531	chr1	+	155579960	155584758	ATAGGGGCAGGGAGTGCTGAGTAGTGATGGTGTCTGGAGGGTCAAATCCATTCCCAATGG	exon sense-overlapping	NM_018116	MSTO1	protein misato homolog 1 isofzorm a	+	155579960	155584758	3.00469	4.08707
ASHGA5P030546	0.0328399	0.0801526	2.11747	down	noncoding	ENST00000561207	RP11-430B1.1	GENCODE	381	chr15	+	52325903	52327822	GGGTTAATAGGCTTTGTTTTTTATTTTATTTTTTCCTTATTTTCTTTTTGGGTTGATAGT	intron sense-overlapping	NM_002748	MAPK6	mitogen-activated protein kinase 6	+	52311410	52358462	4.30248	5.38482
ASHGA5P014936	0.000541556	0.00847825	2.11684	down	noncoding	ENST00000414927	RP11-307B6.3	GENCODE	494	chr1	+	201862969	201869106	AGACAGGGAGGGGCTGCTGATGCTGGTAGAGACAGAGCTGAGGCCACAGTCCTACCCTCT	natural antisense	NM_012134	LMOD1	leiomodin-1	-	201865583	201915716	2.92317	4.00508
ASHGA5P037145	0.000511641	0.00821408	2.11544	down	noncoding	TCONS_00025742	XLOC_012559	LincRNAs identified by Cabili et al	815	chr17	-	66805272	66820947	TTGGTTAGGGAAGACCTCCCTCATAGTGAAATTCCTTCATTAAAATTATCTCAAGTCAAG	intergenic							3.34009	4.42105
ASHGA5P014928	0.00809819	0.0356266	2.1142	down	noncoding	ENST00000414875	RP1-153P14.5	GENCODE	998	chr6	+	37512920	37518636	CTGCGGGGTTTGGGAAGATAGAGGCTGGCAGAGGACTGGGGTAGAAAAGGAAGGAAGAAT	intergenic							4.2556	5.33572
ASHGA5P033175	0.013977	0.049486	2.11381	down	noncoding	ENST00000421610	AC090627.1	GENCODE	670	chr17	+	46371706	46385191	GTGTGGGGGTCTTAATAATTTCTCAGTTCTCAATCTACTCTATGTCATATTAAAGAGGAT	intronic antisense	NM_001075099	SKAP1	src kinase-associated phosphoprotein 1 isoform 2	-	46210801	46507594	4.86699	5.94684
ASHGA5P033175	0.013977	0.049486	2.11381	down	noncoding	ENST00000421610	AC090627.1	GENCODE	670	chr17	+	46371706	46385191	GTGTGGGGGTCTTAATAATTTCTCAGTTCTCAATCTACTCTATGTCATATTAAAGAGGAT	intronic antisense	NM_003726	SKAP1	src kinase-associated phosphoprotein 1 isoform 1	-	46210801	46507594	4.86699	5.94684
ASHGA5P045454	0.00991259	0.0404264	2.11323	down	noncoding	ENST00000545631	MIR600HG	GENCODE	1665	chr9	-	125871779	125873444	ATGGACTGCCCTTCCCCTCTGAGGCAATTATTACATGTAGGACTCTGAACTTTAAACCTT	intergenic							12.1339	13.2134
ASHGA5P023523	0.00703766	0.0330208	2.1127	down	noncoding	ENST00000582919	AC124789.1	GENCODE	419	chr17	-	36606869	36608190	TTCAGCTCCAAGTCTGGCCTCTCCTCCCAGCAAGCAGCCATTACAGAAACTGAGGCTTGG	intronic antisense	NM_001199417	ARHGAP23	rho GTPase-activating protein 23	+	36584719	36668628	6.58942	7.66851
ASHGA5P032119	0.00961278	0.0395527	2.11216	down	noncoding	ENST00000572792	RP11-420A6.2	GENCODE	512	chr17	-	5267609	5274921	GTATCCCACCACCTTCTGGATATGAAAGAAGGGAAAAAAGAATATGTATATATTTGCTTG	intronic antisense	NM_001083585	RABEP1	rab GTPase-binding effector protein 1 isoform 2	+	5185557	5289132	4.40767	5.48639
ASHGA5P032119	0.00961278	0.0395527	2.11216	down	noncoding	ENST00000572792	RP11-420A6.2	GENCODE	512	chr17	-	5267609	5274921	GTATCCCACCACCTTCTGGATATGAAAGAAGGGAAAAAAGAATATGTATATATTTGCTTG	intronic antisense	NM_004703	RABEP1	rab GTPase-binding effector protein 1 isoform 1	+	5185557	5289132	4.40767	5.48639
ASHGA5P049100	0.00475552	0.026465	2.11049	down	noncoding	ENST00000562852	RP11-143N13.2	GENCODE	799	chr16	+	20592209	20598006	TGTAGTGAAAAAGGAAGAAGAAAAACTACCATGCATTATTTTCTCTCCCTCCCTCCTCAA	intergenic							9.07021	10.1478
ASHGA5P022678	0.0214409	0.0628645	2.10999	down	noncoding	ENST00000560727	RP11-707P17.2	GENCODE	630	chr15	+	51750100	51752764	AGAAAAAAGGGTGACTGCCTTCCTTTCATCACGAAGGGCCATTCAAATTTTCTGCCCATG	natural antisense	NM_001174116	DMXL2	dmX-like protein 2 isoform 1	-	51739920	51914967	3.42295	4.50019
ASHGA5P022678	0.0214409	0.0628645	2.10999	down	noncoding	ENST00000560727	RP11-707P17.2	GENCODE	630	chr15	+	51750100	51752764	AGAAAAAAGGGTGACTGCCTTCCTTTCATCACGAAGGGCCATTCAAATTTTCTGCCCATG	natural antisense	NM_001174117	DMXL2	dmX-like protein 2 isoform 3	-	51739920	51914967	3.42295	4.50019
ASHGA5P022678	0.0214409	0.0628645	2.10999	down	noncoding	ENST00000560727	RP11-707P17.2	GENCODE	630	chr15	+	51750100	51752764	AGAAAAAAGGGTGACTGCCTTCCTTTCATCACGAAGGGCCATTCAAATTTTCTGCCCATG	natural antisense	NM_015263	DMXL2	dmX-like protein 2 isoform 2	-	51739920	51914967	3.42295	4.50019
ASHGA5P037935	0.000494068	0.00813536	2.10939	down	noncoding	uc003ajj.3	TUG1	UCSC_knowngene	5564	chr22	+	31368248	31375380	TTAGAGTCCTGTGTTTGTAATTCCATGCATTTGTTATTTTACCTGTTTTGTCCCTGCCCC	intergenic							2.9453	4.02212
ASHGA5P051824	0.0289193	0.0750324	2.10815	down	noncoding	ENST00000420064	RP11-175P19.2	pseudogene	602	chr3	-	193296600	193297202	TGCCCTTCTGCCTTACACACAGGGTGTGAAAAAACTAATTGTTGGAGTTGACAAAATGGA								3.99697	5.07295
ASHGA5P041827	0.0165303	0.0549877	2.10655	down	noncoding	TCONS_00020413	XLOC_009740	LincRNAs identified by Cabili et al	811	chr12	+	49455910	49457826	AATTCTTACATCATTAGGAATGAGGGGCTTCCTTTCTTCTCCTGAAACCCCATCATCTTT	intergenic							6.87023	7.94511
ASHGA5P028530	0.0125256	0.04651	2.10564	down	noncoding	TCONS_00009837	XLOC_004253	LincRNAs identified by Cabili et al	324	chr5	+	2268284	2278578	GGAATTTGTTGAGGGAATTTGTATTTTCTGCTGCTTTCTCCTTGAACCTATTTGCATTTT	intergenic							3.95312	5.02738
ASHGA5P000167	0.00842913	0.0365077	2.10436	down	noncoding	chr1:4325150-4335375-	chr1:4325150-4335375	LincRNAs identified by Khalil et al	10225	chr1	-	4425290	4435515	TGGGGGCTCCATTTCCATCAACTTCCACTGATTTAGTCCATTTTCTTGTCAAGCCTAATG	intergenic							4.45639	5.52977
ASHGA5P031105	0.0104592	0.0418018	2.10404	down	noncoding	TCONS_00006092	XLOC_002701	LincRNAs identified by Cabili et al	466	chr3	+	71835019	71835668	TTTATGCCCACATCTGTTCCCGACCCTCTCCTCTGATTTTCCTCACATGTATTTCCTCCC	intergenic							6.764	7.83716
ASHGA5P051665	0.00113971	0.0123784	2.10292	down	noncoding	ENST00000504808	RP11-77P16.4	GENCODE	545	chr3	+	129831494	129838359	TTATCGGGGACACTCATTAAAAATGTGAGTCTGCTCCAGATGGACTCTCTCTCTTTCTGC	intergenic							3.54751	4.6199
ASHGA5P058206	0.0259286	0.0705689	2.09929	down	noncoding	TCONS_00028191	XLOC_013543	LincRNAs identified by Cabili et al	1920	chr20	+	46523122	46525630	GGAGCTGCCAACCCAGGGAGGAGCAATTTTGTTGTAGTTCAAGGGTCCGGTAGCTGGCAA	intergenic							3.36364	4.43354
ASHGA5P037519	0.00796464	0.0353426	2.09922	down	noncoding	TCONS_00026020	XLOC_012360	LincRNAs identified by Cabili et al	861	chr17	-	4062959	4063932	TAGATATAGGGGTACAGCGCTGAGTAATGTGGATTATAGGGGTACGGCACTGAGTAAAGT	intronic antisense	ENST00000573984	CYB5D2	cytochrome b5 domain containing 2 [Source:HGNC Symbol;Acc:28471]	+	4046995	4090605	3.75298	4.82284
ASHGA5P038142	0.00137937	0.0136472	2.09918	down	noncoding	uc021onu.1	HP08874	UCSC_knowngene	677	chr1	+	55352654	55353883	AGAAGCTAAACATGACATACCAGGTTCTTCTCTGTCTGGCCTTGCATACCTATCCAGTTC	natural antisense	NM_014762	DHCR24	delta(24)-sterol reductase precursor	-	55315299	55352921	3.75918	4.829
ASHGA5P053841	0.00493683	0.0271082	2.0985	down	noncoding	NR_033374	LOC100289019	RefSeq	3842	chr9	-	130873449	130881013	ATCCCTGCATGCCTCCGTTCTCTGCATCCCTCCACCCCAGTATCCCTGCACCTCTTCATC	intergenic							10.6991	11.7685
ASHGA5P030825	0.0073669	0.0336715	2.09818	down	noncoding	uc010utu.2	WASH3P	UCSC_knowngene	1923	chr15	+	102501015	102514305	ACCCGGAGGCGCGGGCGGACTGTGGGCGGCGGGGCTAGGACCCAGCGGCTCCGGCAGAGC	intergenic							3.4266	4.49574
ASHGA5P030516	0.0161922	0.0543137	2.0955	down	noncoding	ENST00000560705	RP11-718O11.1	GENCODE	861	chr15	+	45997275	46141083	TTCCTTTGAGCTCCTCCACCCTCCAAAGTCAAGTCTTAACAAAACAACATATTCCCCATG	intergenic							6.74234	7.80963
ASHGA5P043784	0.00685183	0.0325248	2.09227	down	noncoding	ENST00000435021	RP11-23I7.1	GENCODE	445	chr1	+	204632999	204633741	TCAGGAAACTCACTCCTTTGCTTACCCTCTCTCCACTTTTAAAAATAACGATATAAATGC	intronic antisense	NM_006338	LRRN2	leucine-rich repeat neuronal protein 2 precursor	-	204586302	204654481	5.57269	6.63776
ASHGA5P043784	0.00685183	0.0325248	2.09227	down	noncoding	ENST00000435021	RP11-23I7.1	GENCODE	445	chr1	+	204632999	204633741	TCAGGAAACTCACTCCTTTGCTTACCCTCTCTCCACTTTTAAAAATAACGATATAAATGC	intronic antisense	NM_201630	LRRN2	leucine-rich repeat neuronal protein 2 precursor	-	204586302	204654597	5.57269	6.63776
ASHGA5P048862	0.00725658	0.0334702	2.09174	down	noncoding	ENST00000558345	RP11-182J1.9	GENCODE	560	chr15	+	85114201	85116429	GCTTCCGGCTGCCCCCTCCTGGCTTTGACCCAGCACTGCTGGACCCATCTAGTCCGTTCC	intergenic							9.47259	10.5373
ASHGA5P034165	0.0321656	0.0793594	2.09105	down	noncoding	BG399904		LincRNAs identified by Khalil et al	473	chr12	-	28173729	28174202	GAGAACCCCAATATGCAAATAAGCAGTCATAGTTATTCCCAAAATACCTATTATATTCCC	intergenic							4.73409	5.79832
ASHGA5P057730	0.0018842	0.0159689	2.09008	down	noncoding	TCONS_00021260	XLOC_009959	LincRNAs identified by Cabili et al	470	chr12	+	132148445	132149209	AGTCACCATGGACCCCTCCCCTCCCATGGCTTTGAGCCCATGAGATGGCCTTGGACAAAG	intergenic							12.6135	13.677
ASHGA5P040648	0.000202017	0.00499936	2.08895	down	noncoding	ENST00000502275	RP11-395P13.3	GENCODE	760	chr5	-	124705857	124706617	ATGTTTCACTCTTTGCTGGAGTTTACTTTAAAAGCCTCCCTTTCCCTTCAACATTATCAA	intergenic							5.62866	6.69144
ASHGA5P050265	0.0159685	0.0537786	2.08889	down	noncoding	TCONS_00000801	XLOC_000017	LincRNAs identified by Cabili et al	481	chr1	+	1317608	1318166	AATCCAGTAACAATCCAGAGGTCACCACCCTTCCCAACAATCCAGTAACAATCCAGAGGC	intergenic							5.89312	6.95586
ASHGA5P050815	0.0145659	0.0509145	2.08777	down	noncoding	ENST00000490341	TUBA4B	GENCODE	1380	chr2	+	220117964	220136910	AAGATAGGGGGGATGAATACTAGGGGAATACTGTGTGTCTGTCCTACATAAAGTGCTGTG	intronic antisense	NM_006000	TUBA4A	tubulin alpha-4A chain	-	220115000	220118638	4.69918	5.76114
ASHGA5P031342	0.00641558	0.0312088	2.08708	down	noncoding	ENST00000568136	RP11-481E4.2	GENCODE	543	chr16	-	82529597	82544501	GATATCACATGGAACTCTTCTCTCCCACTCTGTCACTTGACTGCCTTCTTGCCTGATGAG	intergenic							6.38128	7.44277
ASHGA5P039914	0.00994952	0.0405053	2.08687	down	noncoding	ENST00000507639	RP11-328N19.1	GENCODE	708	chr4	+	44018877	44022273	CTGCCACACAGAAAAAGGAGGGGTTGCAACTGCCACGCAGAAAAAGGAGGGGTTGCAACT	intergenic							3.74748	4.80882
ASHGA5P033089	0.0160552	0.0539916	2.08539	down	noncoding	TCONS_00028190	XLOC_013543	LincRNAs identified by Cabili et al	2018	chr20	+	46523122	46525630	TGCTGTTCATGTCTGAGGGTTGTAGAGCTGGAGACCCAGGGAGAAGCCCGTACTACAGCT	intergenic							5.52324	6.58356
ASHGA5P045838	0.0357793	0.0839758	2.085	down	noncoding	uc004aua.1	DNAPTP1	UCSC_knowngene	1867	chr9	+	96325163	96327030	GGCCAAAATTGGCATCCTCTCTCTTCTGTTTATCAGAAACCACCTTCTCATTTGTTGTCC	exon sense-overlapping	NM_014612	FAM120A	constitutive coactivator of PPAR-gamma-like protein 1	+	96214172	96328397	4.22777	5.28782
ASHGA5P057278	0.0132259	0.047869	2.08482	down	noncoding	TCONS_00015203	XLOC_006681	LincRNAs identified by Cabili et al	351	chr8	+	928225	928734	TTTGGTGTTGTGGGGAGGGGCGTCGGGGATGCAGTGAGGTGCTGGGTTCTGGTCTTTGGT	intergenic							5.17648	6.23641
ASHGA5P057632	0.0325372	0.0797709	2.08456	down	noncoding	TCONS_00019972	XLOC_009249	LincRNAs identified by Cabili et al	663	chr11	+	91577563	91589682	AGAGAGAGAGAAAAGATCTGAAGAGAGTGGTTGCAGTTTGAGCTCTGTCAATGGGACAGT	intergenic							3.68796	4.7477
ASHGA5P042240	0.0203659	0.0612923	2.08197	down	noncoding	ENST00000439891	RP11-203H2.1	GENCODE	527	chr6	+	8328383	8342688	GAGAGAGAGGAGGAGATTTACATCACACAGCAAACAACCTAATAAATCTGTTAAACGCCA	intergenic							3.16531	4.22326
ASHGA5P032427	0.00582167	0.0296834	2.08137	down	noncoding	TCONS_00029901	XLOC_014361	LincRNAs identified by Cabili et al	203	chr22	-	36517579	36525898	TGACAAGGGAATCTTCCTTCATTTTCTCCTCTGATGAGCCTCTCTACCAGATAAGCAGCA	intergenic							3.68348	4.74101
ASHGA5P022515	0.00175229	0.0154347	2.08078	down	noncoding	ENST00000558251	UBE2Q2P1	GENCODE	595	chr15	-	85085375	85113943	CAACATCACGTCAGGTTTTCCTTGTTCCCGCATGTTCAGCCAATCGTGTTTAAGGAGAAA	intergenic							4.43596	5.49309
ASHGA5P048184	0.011201	0.0434882	2.08042	down	noncoding	ENST00000537965	SNHG1	GENCODE	578	chr11	-	62621839	62622960	GTTTTCTGGTTCCTCTTGTTCTCTGTAGTGATGTTTCTAGATAGATGCCCACTGATATAT	bidirectional	NM_001012662	SLC3A2	4F2 cell-surface antigen heavy chain isoform b	+	62623483	62656355	4.9218	5.97867
ASHGA5P048184	0.011201	0.0434882	2.08042	down	noncoding	ENST00000537965	SNHG1	GENCODE	578	chr11	-	62621839	62622960	GTTTTCTGGTTCCTCTTGTTCTCTGTAGTGATGTTTCTAGATAGATGCCCACTGATATAT	bidirectional	NM_001012664	SLC3A2	4F2 cell-surface antigen heavy chain isoform e	+	62623483	62656355	4.9218	5.97867
ASHGA5P048184	0.011201	0.0434882	2.08042	down	noncoding	ENST00000537965	SNHG1	GENCODE	578	chr11	-	62621839	62622960	GTTTTCTGGTTCCTCTTGTTCTCTGTAGTGATGTTTCTAGATAGATGCCCACTGATATAT	bidirectional	NM_002394	SLC3A2	4F2 cell-surface antigen heavy chain isoform c	+	62623483	62656355	4.9218	5.97867
ASHGA5P016258	0.000375639	0.0069264	2.08001	down	noncoding	ENST00000428651	AC093375.1	GENCODE	1603	chr2	-	156877046	156881088	CCAAGCAAAGATTCCTGAGCCTGAGTCTACTGACAAATATACCACATCCCCAGAGTAAGT	intergenic							2.91235	3.96895
ASHGA5P030212	0.0216749	0.0632482	2.07951	down	noncoding	uc002bke.2	DQ586822	UCSC_knowngene	2994	chr15	-	84944255	84947249	AACAACTGTACAAGGTGTTGTCACAATCAGTTAGTGACTGAGAGGGATTGATATCATGGA	intergenic							4.53484	5.59108
ASHGA5P016057	0.0070814	0.0330831	2.0794	down	noncoding	ENST00000426316	RP4-669L17.11	GENCODE	468	chr1	+	317810	328455	AGTAATTTGCTTGTATGGAATTTTGCCTGAGAGACCTCATTCCTCACGTCGGCCATTCCA	intergenic							4.61222	5.66838
ASHGA5P015465	0.00713224	0.0332489	2.07837	down	noncoding	ENST00000420508	KB-1592A4.15	GENCODE	4833	chr22	-	21468895	21478740	GTGGCCACAGCCCCACCCCACCGGCTCAGGGGTTCTTCCCAGCGGCGCTGATCATGAAGT	exon sense-overlapping	ENST00000419447	POM121L7	POM121 transmembrane nucleoporin-like 7 [Source:HGNC Symbol;Acc:35444]	-	21477049	21482046	7.46075	8.5162
ASHGA5P049562	0.0189031	0.0590065	2.07802	down	noncoding	ENST00000580574	CCDC144C	GENCODE	896	chr17	+	20243204	20246138	ATGGAGAGCATGACAGGTAAGCCTATAGCAGCGTTTAACAGGAGACAATTGGTCAAGTGT	intergenic							3.69784	4.75305
ASHGA5P023019	0.00066855	0.00970819	2.07631	down	noncoding	uc003icc.1	AK024248	UCSC_knowngene	4392	chr4	+	119512927	119554881	CTGAAGAAGGGATGATGATTATTCCCCACCTTCTAAGAGACAAAGACCAACGAGCCACCA	intergenic							3.39051	4.44454
ASHGA5P034244	0.000560879	0.00867763	2.07316	down	noncoding	TCONS_00004944	XLOC_001747	LincRNAs identified by Cabili et al	383	chr2	+	171626759	171627337	TTAGAATTCTGTAACAGAAAAGCTCCCCACCCCCTACTGTGACCCAAGCAGTTACTTAAA	intergenic							10.1762	11.228
ASHGA5P027733	0.000990713	0.0115948	2.07289	down	noncoding	CD106372		LincRNAs identified by Khalil et al	850	chrX	+	40913909	40914757	GTCTTTAACTTCTGCTTGCTACCCTATTCCCAATAGAAATGTAGGTTGCTTAAAGTTTTT	intergenic							3.03439	4.08603
ASHGA5P027458	0.0323595	0.0796122	2.07279	down	noncoding	TCONS_00012342	XLOC_005894	LincRNAs identified by Cabili et al	262	chr6	-	158211220	158226738	ACTTTTTATTTGTGTCCTGTGTTCTGTCCTCATTTGTGGTGGACCATGATGGACCTGGCA	intergenic							3.46189	4.51347
ASHGA5P041248	0.00960807	0.0395518	2.0719	down	noncoding	ENST00000411804	RP1-91G5.3	GENCODE	707	chr1	+	152346429	152417932	CGGCACTTTATTTCCTTCCCGTTCTGCCCCTTTATATAAATAAAGAAAAGTATGAAAGAT	intronic antisense	NM_016190	CRNN	cornulin	-	152381718	152386750	5.67099	6.72194
ASHGA5P056032	0.000106352	0.00356608	2.07171	down	noncoding	TCONS_00026279	XLOC_012626	LincRNAs identified by Cabili et al	1743	chr18	+	11489031	11490912	ATGATGTCACAAAGAGAAGTGAGAAATAATGCAAGCAGCTCCATTCCCCACGGCAACTGT	intergenic							3.79498	4.84581
ASHGA5P035058	0.0262501	0.0709207	2.07141	down	noncoding	TCONS_00005289	XLOC_002424	LincRNAs identified by Cabili et al	381	chr2	-	186029618	186031910	CTCCTCTTCAAATACGGCTCTTGGCTATGCTTGTGAATTTTGTGAATATACAATTATTTC	intergenic							3.75794	4.80856
ASHGA5P058602	0.00135678	0.0136076	2.06966	down	noncoding	uc010sdj.1	DDX11L11	UCSC_knowngene	1167	chr12	-	91352	93018	TTGGATCACAGTCTTGTGAGTGTCCCCAGTGTTGCAGAGGCAGGGCCATCAGGCACCAAA	intergenic							3.23843	4.28782
ASHGA5P049918	0.000861264	0.010894	2.06902	down	noncoding	TCONS_00002241	XLOC_000587	LincRNAs identified by Cabili et al	750	chr1	+	225898089	225904316	GCTAATAACAAACTTCTTCCGTGCTAATATCTCTCAGTGTCTCCTTCCCTGGGAACTCAA	intergenic							4.47326	5.52221
ASHGA5P029445	9.18651e-05	0.00325803	2.06619	down	noncoding	TCONS_00010279	XLOC_004746	LincRNAs identified by Cabili et al	1050	chr5	-	17378025	17379311	TTATGAATTTTCACAGGTTTTCCCCAGTGGATGTCTTTGGCGTCTGCTATCTCTACTGCG	intergenic							3.13492	4.18189
ASHGA5P057279	0.00105801	0.0118894	2.06559	down	noncoding	TCONS_00015205	XLOC_006686	LincRNAs identified by Cabili et al	477	chr8	+	1321474	1322111	AATCCGGGATCAGGGGTTCCAGTCTCGATCATCAGTGAAGTCCTTCCACATCCATGGGGC	intergenic							4.09246	5.13902
ASHGA5P029853	0.00156648	0.014488	2.06488	down	noncoding	ENST00000568414	RP11-854K16.3	GENCODE	510	chr15	-	21333026	21335424	ATATTCCTGTTTTGGCTTGTATTGACAAGTTGTTTTCACACAGCCCCCACATCACCCAAC	intergenic							5.71183	6.75789
ASHGA5P040132	0.0265706	0.0714934	2.0646	down	noncoding	uc009whu.1	DQ592442	UCSC_knowngene	2772	chr1	+	142853227	142855999	CACCGCATTACTGAAGCTATACTAACAACAGTCACTTTTAGTGGGTACTTCATGCATCAG	intergenic							4.41467	5.46053
ASHGA5P033860	0.0084248	0.0365077	2.06387	down	noncoding	ENST00000579506	RP11-202D1.3	GENCODE	384	chr18	+	51094840	51104092	GCACAGTGATTGACAATCTCCTTTCTCCTCAACTAGAATGTCATTTCCTTTTTTAAAACT	intergenic							3.03004	4.0754
ASHGA5P030023	0.0150118	0.0519803	2.06249	down	noncoding	uc001zyw.1	AK091906	UCSC_knowngene	1973	chr15	-	51132072	51144737	CAAAAATGATTTGAAGATCATCAGGCCACCACTCCCACCATAGGAACAGAGGACCTAACT	intergenic							5.32313	6.36752
ASHGA5P028542	0.0186062	0.0584364	2.062	down	noncoding	NR_046414	LINC00441	RefSeq	1191	chr13	-	48870648	48877797	AGTTTCCTCTTTTTTGTTTTCTTAATGGCTTGATGAGCCACACATGTTTCTCTAAATGCA	bidirectional	NM_000321	RB1	retinoblastoma-associated protein	+	48877882	49056026	4.13786	5.18191
ASHGA5P051241	0.00891375	0.0376517	2.061	down	noncoding	ENST00000424029	CES5AP1	GENCODE	292	chr22	-	23715834	23719258	ATGGGACATTCCTGTCTCCTCCTCAGGTTTTGTTGTGGTTCCCAGGCGGTGCCTTCGAGA	intergenic							4.6789	5.72224
ASHGA5P058718	0.00183753	0.0157442	2.0589	down	noncoding	uc.340-	uc.340	UCR	259	chr12	-	54090831	54091090	TATATTTGAAGAATAAATCACCCTCCCCGCTCGGAATGAATTCGCTGTCAAACTCGGCTC	intergenic							9.47235	10.5142
ASHGA5P028516	0.0480465	0.100076	2.05883	down	noncoding	TCONS_00010597	XLOC_004244	LincRNAs identified by Cabili et al	1623	chr5	+	1043854	1046915	TTAGTGTGTGAATGGATGAGTTAGTGTGTGAATGAGTGGGTTAGTGTGTGAATGAGTCGG	intergenic							3.59909	4.64091
ASHGA5P035567	0.0215463	0.0630265	2.05813	down	noncoding	ENST00000421907	AC007557.2	GENCODE	430	chr2	-	217731054	217732536	CCTCCCCACCAAAATAATAATAATAATAAGGCTACACAGTATCTGGAATTTCTTGCTCAT	intergenic							6.41777	7.4591
ASHGA5P046390	0.000859958	0.010894	2.05664	down	noncoding	AW847630R		LincRNAs identified by Khalil et al	188	chr18	+	39409625	39409813	AAGCCCTGGATATTGCCCTCTAGGCCACACAATCCTTCTTCTCCCTCACAAAGATAAATT	intergenic							5.82041	6.86069
[truncated: 54 more rows]
