# Supplementary material for: Age and poverty status alter the coding and noncoding transcriptome
Source: Aging (Albany NY). 2019 Feb 17;11(4):1189–203. doi: 10.18632/aging.101823 (PMC6402526; doi:10.18632/aging.101823)
Supplement: Supplementary Table 3 [file aging-11-101823-s004.xlsx]

## Sheet: Sheet1
Supplementary Table 3. lncRNAs significantly higher in abundance in white males living above poverty.
ProbeName	P-value	FDR	Fold Change	Regulation	type	seqname	GeneSymbol	source	RNAlength	chrom	strand	txStart	txEnd	Sequence	relationship	Associated_gene_acc	Associated_gene_name	Associated_protein_name	Associated_gene_strand	Associated_gene_start	Associated_gene_end	group-AP(normalized)	group-BP(normalized)
ASHGA5P032359	0.00640723	0.0410595	15.9279	up	noncoding	uc002hlt.1	D63785	UCSC_knowngene	185	chr17	-	34610748	34611354	AAGAGAGGCCGGCAGGTCTGTGCTGACCCCAGTGAGGAGTGGGTCCAGAAATACGTCAGT	intron sense-overlapping	ENST00000308078	TBC1D3C	TBC1 domain family, member 3C [Source:HGNC Symbol;Acc:24889]	-	34580901	34757050	7.68301	3.68953
ASHGA5P032359	0.00640723	0.0410595	15.9279	up	noncoding	uc002hlt.1	D63785	UCSC_knowngene	185	chr17	-	34610748	34611354	AAGAGAGGCCGGCAGGTCTGTGCTGACCCCAGTGAGGAGTGGGTCCAGAAATACGTCAGT	intron sense-overlapping	ENST00000400684	TBC1D3H	TBC1 domain family, member 3H [Source:HGNC Symbol;Acc:30708]	-	34581132	34808061	7.68301	3.68953
ASHGA5P032359	0.00640723	0.0410595	15.9279	up	noncoding	uc002hlt.1	D63785	UCSC_knowngene	185	chr17	-	34610748	34611354	AAGAGAGGCCGGCAGGTCTGTGCTGACCCCAGTGAGGAGTGGGTCCAGAAATACGTCAGT	intron sense-overlapping	ENST00000451448	TBC1D3C	TBC1 domain family, member 3C [Source:HGNC Symbol;Acc:24889]	-	34581090	34756219	7.68301	3.68953
ASHGA5P032359	0.00640723	0.0410595	15.9279	up	noncoding	uc002hlt.1	D63785	UCSC_knowngene	185	chr17	-	34610748	34611354	AAGAGAGGCCGGCAGGTCTGTGCTGACCCCAGTGAGGAGTGGGTCCAGAAATACGTCAGT	intron sense-overlapping	ENST00000535446	TBC1D3H	TBC1 domain family, member 3H [Source:HGNC Symbol;Acc:30708]	-	34581085	34806015	7.68301	3.68953
ASHGA5P044158	0.0280651	0.0814569	12.7447	up	noncoding	ENST00000566457	CTD-3247F14.2	GENCODE	4997	chr8	-	22536525	22541522	ACTGCATTTGCATCTCGGATTGTGTTTTTAAACCCATTTTCTCCCATATTTGCCTGAAAA	intergenic							6.62194	2.95012
ASHGA5P031573	0.00590229	0.0404119	9.12848	up	noncoding	TCONS_00006666	XLOC_003262	LincRNAs identified by Cabili et al	943	chr3	-	134294593	134299804	GGAGAGAATTTAAGGGGGCTTACATGTAAAAGTCATTGCATTTCTCTGCAATATGTAATT	intergenic							7.05797	3.8676
ASHGA5P045585	0.0222527	0.0711023	9.01842	up	noncoding	ENST00000442069	RP11-143M1.2	GENCODE	575	chr9	+	72715	75298	AGTGAACGCGTTGGGAACAATATGGAAAACTGGGAGCCGCCTTGGAATCTACAGGGCCGG	intergenic							6.02977	2.85689
ASHGA5P023294	0.00571608	0.0402776	8.86371	up	noncoding	ENST00000577672	RP1-283E3.4	GENCODE	409	chr1	+	1655950	1667412	TGGTTACCTCGTGAGGCGCCTCAGATTCTTCTGGAGCTGGAGATGAACTCGGACCTCAAG	intronic antisense	NM_001199787	SLC35E2	solute carrier family 35 member E2 isoform 2	-	1656276	1677438	10.0134	6.8655
ASHGA5P023294	0.00571608	0.0402776	8.86371	up	noncoding	ENST00000577672	RP1-283E3.4	GENCODE	409	chr1	+	1655950	1667412	TGGTTACCTCGTGAGGCGCCTCAGATTCTTCTGGAGCTGGAGATGAACTCGGACCTCAAG	intronic antisense	NM_182838	SLC35E2	solute carrier family 35 member E2 isoform 1	-	1658823	1677438	10.0134	6.8655
ASHGA5P036176	0.00374507	0.0370528	8.22959	up	noncoding	ENST00000453636	AC092620.3	GENCODE	680	chr2	+	139362079	139370737	GTGGAACTGTATTCTCTAATCAATATTAGCACATACATATTGCCCCAGACTGTACCTCCT	intergenic							6.69567	3.65485
ASHGA5P049342	0.00639066	0.0410595	8.1486	up	noncoding	ENST00000564138	RP11-510J16.3	GENCODE	2775	chr16	+	81993523	81996298	CTCAACCCTTTTGACTTTAAAAGGAAAATAGCTTAACCTTCAACCTGTGTGACATTTAAC	intergenic							6.1075	3.08095
ASHGA5P015795	0.00343192	0.0361534	8.05228	up	noncoding	ENST00000423617	RP11-622K12.1	GENCODE	541	chrX	+	56755788	56844059	CCTAAACCAGTCTTATGATGTAATCAGCGCGATTTCACTTCCTGAATTTCGATGAATTCT	intergenic							6.59452	3.58512
ASHGA5P022111	0.00264292	0.03424	7.91443	up	noncoding	NR_073022	RPL18	RefSeq	885	chr19	-	49118583	49122675	GTTGGTCAAGGTTTCTGGCCAGAAGAACCAACTCCACATTCAACCAGGTTGTGTTGAAGA	exon sense-overlapping	NM_000979	RPL18	60S ribosomal protein L18 isoform 1	-	49118583	49122675	7.35153	4.36704
ASHGA5P022111	0.00264292	0.03424	7.91443	up	noncoding	NR_073022	RPL18	RefSeq	885	chr19	-	49118583	49122675	GTTGGTCAAGGTTTCTGGCCAGAAGAACCAACTCCACATTCAACCAGGTTGTGTTGAAGA	exon sense-overlapping	NM_001270490	RPL18	60S ribosomal protein L18 isoform 2	-	49118583	49122675	7.35153	4.36704
ASHGA5P022111	0.00264292	0.03424	7.91443	up	noncoding	NR_073022	RPL18	RefSeq	885	chr19	-	49118583	49122675	GTTGGTCAAGGTTTCTGGCCAGAAGAACCAACTCCACATTCAACCAGGTTGTGTTGAAGA	natural antisense	NM_001204158	SPHK2	sphingosine kinase 2 isoform b	+	49122547	49133663	7.35153	4.36704
ASHGA5P022111	0.00264292	0.03424	7.91443	up	noncoding	NR_073022	RPL18	RefSeq	885	chr19	-	49118583	49122675	GTTGGTCAAGGTTTCTGGCCAGAAGAACCAACTCCACATTCAACCAGGTTGTGTTGAAGA	natural antisense	NM_001243876	SPHK2	sphingosine kinase 2 isoform d	+	49122547	49133663	7.35153	4.36704
ASHGA5P022111	0.00264292	0.03424	7.91443	up	noncoding	NR_073022	RPL18	RefSeq	885	chr19	-	49118583	49122675	GTTGGTCAAGGTTTCTGGCCAGAAGAACCAACTCCACATTCAACCAGGTTGTGTTGAAGA	natural antisense	NM_020126	SPHK2	sphingosine kinase 2 isoform a	+	49122547	49133663	7.35153	4.36704
ASHGA5P023061	0.00290155	0.0349843	7.55193	up	noncoding	ENST00000568835	CTD-2576F9.2	GENCODE	675	chr15	+	95399058	95400214	CGCCGTGGAGGCCGAGGCTGACAAGCCCCGAAGGCTGGGGCGGCTCAAGTACCAGGCACC	intergenic							6.53989	3.62304
ASHGA5P019912	0.00609653	0.0406789	7.04098	up	noncoding	ENST00000506340	CTC-338M12.4	GENCODE	687	chr5	+	180673524	180684245	TCCATACAAGCTTGCAGAGTCAAGACGAACTCTAACTCATGGGATGGACAAACTGGAAGA	natural antisense	NM_032765	TRIM52	tripartite motif-containing protein 52	-	180683385	180688119	5.71916	2.90338
ASHGA5P011991	0.00451342	0.0386604	6.53902	up	noncoding	NR_015367	LOC550643	RefSeq	722	chrX	+	56755717	56844004	CCTAAACCAGTCTTTGAGTGATTGCAGTATGACTCCATTTCCCTGGTGCATTCATATAAT	intergenic							7.00095	4.29188
ASHGA5P042724	0.0241379	0.0741425	6.38801	up	noncoding	ENST00000446476	RP5-826L7.1	GENCODE	600	chr6	+	164007614	164009197	CTGTAGTTTTCCAGCAAAATCTAGCTAAACTCCTACCACAAATGTAACAGGCATATAAAA	intergenic							5.42378	2.74841
ASHGA5P022112	0.000660607	0.0218485	6.34958	up	noncoding	NR_037715	RNASEK	RefSeq	1047	chr17	+	6915735	6917852	TCCGAATCCAATAATGCTCGGAATATTTTTCAATGTCCATTCCGCTGTGTTGATTGAGGA	exon sense-overlapping	NM_001004333	RNASEK	ribonuclease kappa	+	6915735	6917852	5.90371	3.23705
ASHGA5P039403	0.00256172	0.0338419	6.2557	up	noncoding	ENST00000511164	RAC1P2	pseudogene	579	chr4	-	46725846	46726425	ACTTGATCTTAGGGATGATAAAGACCCGATCGAGAAACTGAAGGAGAAGAAGCTGACTCC								6.87282	4.22764
ASHGA5P043717	0.0130978	0.0528323	6.01354	up	noncoding	NR_037776	WBSCR22	RefSeq	1452	chr7	+	73097897	73112551	TCTCTGGTAAATCAACTTTAAGTTGCCGACCTCTCTGGGCCTCGGTACCTCAGCGTTGAG	exon sense-overlapping	NM_001202560	WBSCR22	uncharacterized methyltransferase WBSCR22 isoform 1	+	73097897	73112551	8.20586	5.61765
ASHGA5P043717	0.0130978	0.0528323	6.01354	up	noncoding	NR_037776	WBSCR22	RefSeq	1452	chr7	+	73097897	73112551	TCTCTGGTAAATCAACTTTAAGTTGCCGACCTCTCTGGGCCTCGGTACCTCAGCGTTGAG	exon sense-overlapping	NM_017528	WBSCR22	uncharacterized methyltransferase WBSCR22 isoform 2	+	73097897	73112551	8.20586	5.61765
ASHGA5P022447	0.027643	0.0807911	6.00159	up	noncoding	NR_037600	LOC100507217	RefSeq	1593	chr15	+	93426072	93441977	CTCGGACCCGGTGACTTAAGAGATTAAAATTAATTTGGTTGCTGTTGGTTCTGAACAAAT	exon sense-overlapping	ENST00000556722	CHD2	chromodomain helicase DNA binding protein 2 [Source:HGNC Symbol;Acc:1917]	+	93426525	93480855	6.38256	3.79721
ASHGA5P022048	0.00211231	0.0314014	5.81228	up	noncoding	NR_037717	RNASEK-C17ORF49	RefSeq	1909	chr17	+	6915735	6920843	GAGTGATCATATAATGCTCGGAATATTTTTCAATGTCCATTCCGCTGTGTTGATTGAGGA	exon sense-overlapping	NM_001004333	RNASEK	ribonuclease kappa	+	6915735	6917852	5.8817	3.34259
ASHGA5P022048	0.00211231	0.0314014	5.81228	up	noncoding	NR_037717	RNASEK-C17ORF49	RefSeq	1909	chr17	+	6915735	6920843	GAGTGATCATATAATGCTCGGAATATTTTTCAATGTCCATTCCGCTGTGTTGATTGAGGA	exon sense-overlapping	NM_001142798	C17orf49	chromatin complexes subunit BAP18 isoform 1	+	6918055	6920843	5.8817	3.34259
ASHGA5P022048	0.00211231	0.0314014	5.81228	up	noncoding	NR_037717	RNASEK-C17ORF49	RefSeq	1909	chr17	+	6915735	6920843	GAGTGATCATATAATGCTCGGAATATTTTTCAATGTCCATTCCGCTGTGTTGATTGAGGA	exon sense-overlapping	NM_001142799	C17orf49	chromatin complexes subunit BAP18 isoform 3	+	6918055	6920843	5.8817	3.34259
ASHGA5P022048	0.00211231	0.0314014	5.81228	up	noncoding	NR_037717	RNASEK-C17ORF49	RefSeq	1909	chr17	+	6915735	6920843	GAGTGATCATATAATGCTCGGAATATTTTTCAATGTCCATTCCGCTGTGTTGATTGAGGA	exon sense-overlapping	NM_174893	C17orf49	chromatin complexes subunit BAP18 isoform 2	+	6918055	6920843	5.8817	3.34259
ASHGA5P023527	0.00682321	0.0419474	5.66351	up	noncoding	ENST00000583065	RPL6P27	GENCODE	748	chr18	-	6462150	6463014	TGGTGGCAAGAAAGGCCATGTAGAAGAGGAAGTACTCAGCCGCTAAATCCAAGGTTGAAA	intergenic							6.81979	4.3181
ASHGA5P020816	0.00185127	0.0301717	5.65337	up	noncoding	NR_045493	LSM1	RefSeq	883	chr8	-	38020838	38034248	TCCCCCAACGAAAAGCACTTGGTTCTGCTTCGAGATGGAAGGACACTTATAGGCTTTTTA	exon sense-overlapping	NM_014462	LSM1	U6 snRNA-associated Sm-like protein LSm1	-	38020838	38034248	5.47695	2.97784
ASHGA5P020816	0.00185127	0.0301717	5.65337	up	noncoding	NR_045493	LSM1	RefSeq	883	chr8	-	38020838	38034248	TCCCCCAACGAAAAGCACTTGGTTCTGCTTCGAGATGGAAGGACACTTATAGGCTTTTTA	natural antisense	NM_001204878	BAG4	BAG family molecular chaperone regulator 4 isoform 2	+	38034105	38070819	5.47695	2.97784
ASHGA5P020816	0.00185127	0.0301717	5.65337	up	noncoding	NR_045493	LSM1	RefSeq	883	chr8	-	38020838	38034248	TCCCCCAACGAAAAGCACTTGGTTCTGCTTCGAGATGGAAGGACACTTATAGGCTTTTTA	natural antisense	NM_004874	BAG4	BAG family molecular chaperone regulator 4 isoform 1	+	38034105	38070819	5.47695	2.97784
ASHGA5P023488	0.0059374	0.0404867	5.63082	up	noncoding	NR_034041	SRSF1	RefSeq	4747	chr17	-	56078279	56084707	GGAGGCAATGGTTTGGATTGGAGAGGGCTCACTGGATCCCAATCCTTGGAGCTGGATCAT	exon sense-overlapping	NM_001078166	SRSF1	serine/arginine-rich splicing factor 1 isoform 2	-	56078279	56084707	5.23175	2.7384
ASHGA5P023488	0.0059374	0.0404867	5.63082	up	noncoding	NR_034041	SRSF1	RefSeq	4747	chr17	-	56078279	56084707	GGAGGCAATGGTTTGGATTGGAGAGGGCTCACTGGATCCCAATCCTTGGAGCTGGATCAT	exon sense-overlapping	NM_006924	SRSF1	serine/arginine-rich splicing factor 1 isoform 1	-	56078279	56084707	5.23175	2.7384
ASHGA5P018285	0.0133119	0.0532681	5.35964	up	noncoding	ENST00000451583	RP11-622K12.1	GENCODE	305	chrX	+	56755805	56843809	CCCAACGGAGTCTTTGAGTGATTGCAGTATGACTCCATTTCCCTGGTGCATTCATATAAT	intergenic							6.63374	4.21161
ASHGA5P042852	0.0121869	0.0509799	5.33844	up	noncoding	uc011jsq.2	HLA-DQB	UCSC_knowngene	732	chr6_ssto_hap7	-	4056463	4058803	TTTTAACTGGGATTGGTTATCACTTTTCTGTAACGCCTGCTTGTCCCTGCCCAGAATTCC	intergenic							8.20444	5.78802
ASHGA5P046002	0.00339772	0.0361534	5.33333	up	noncoding	uc004bxw.3	LOC100506190	UCSC_knowngene	1757	chr9	+	132250938	132266538	AATGTAGTGTCTTTAGACCGTGCAATGTTGTGCTCCTGTTAGTCTGATATCAGGGGCTTG	intergenic							7.66743	5.25239
ASHGA5P045340	0.0114859	0.0494912	5.32874	up	noncoding	NR_023390	LINC00476	RefSeq	8030	chr9	-	98568369	98638259	GCGTTTGTAATTCAGCATCTTAAAATGTCTCTTTTGGCAGTATTTCTTTACAAATGTGGC	natural antisense	NM_001010895	ERCC6L2	RAD26L hypothetical protein	+	98637899	98731122	5.82945	3.41566
ASHGA5P019074	0.00342879	0.0361534	5.28643	up	noncoding	NR_033758	MINOS1	RefSeq	3805	chr1	+	19923470	19956315	GCCACAGGAAGGGTACTGGTTTTGGATTAGGAATTGTTTTCTCACTTACCTTCTTTAAAA	exon sense-overlapping	NM_001032363	MINOS1	mitochondrial inner membrane organizing system protein 1 isoform a	+	19923470	19956315	6.86968	4.46739
ASHGA5P019074	0.00342879	0.0361534	5.28643	up	noncoding	NR_033758	MINOS1	RefSeq	3805	chr1	+	19923470	19956315	GCCACAGGAAGGGTACTGGTTTTGGATTAGGAATTGTTTTCTCACTTACCTTCTTTAAAA	exon sense-overlapping	NM_001204082	MINOS1	mitochondrial inner membrane organizing system protein 1 isoform b	+	19923470	19956315	6.86968	4.46739
ASHGA5P019074	0.00342879	0.0361534	5.28643	up	noncoding	NR_033758	MINOS1	RefSeq	3805	chr1	+	19923470	19956315	GCCACAGGAAGGGTACTGGTTTTGGATTAGGAATTGTTTTCTCACTTACCTTCTTTAAAA	exon sense-overlapping	NM_001204083	MINOS1	mitochondrial inner membrane organizing system protein 1 isoform c	+	19923470	19956315	6.86968	4.46739
ASHGA5P019074	0.00342879	0.0361534	5.28643	up	noncoding	NR_033758	MINOS1	RefSeq	3805	chr1	+	19923470	19956315	GCCACAGGAAGGGTACTGGTTTTGGATTAGGAATTGTTTTCTCACTTACCTTCTTTAAAA	exon sense-overlapping	NM_001204088	C1orf151-NBL1	C1orf151-NBL1 read-through protein isoform a	+	19923470	19984949	6.86968	4.46739
ASHGA5P019074	0.00342879	0.0361534	5.28643	up	noncoding	NR_033758	MINOS1	RefSeq	3805	chr1	+	19923470	19956315	GCCACAGGAAGGGTACTGGTTTTGGATTAGGAATTGTTTTCTCACTTACCTTCTTTAAAA	exon sense-overlapping	NM_001204089	C1orf151-NBL1	C1orf151-NBL1 read-through protein isoform b precursor	+	19923470	19984949	6.86968	4.46739
ASHGA5P037632	0.00450685	0.0386604	5.21766	up	noncoding	ENST00000564772	CTA-445C9.15	GENCODE	3054	chr22	-	26917948	26921002	GCAGCATGCATCATTCATTCTGATTCCTTAATTTGCCATATGTGAAAACATGGTAATCTA	intergenic							5.71683	3.33343
ASHGA5P030559	0.00891859	0.0449635	5.19064	up	noncoding	uc010ugt.1	LOC283663	UCSC_knowngene	2536	chr15	+	57592562	57599965	TCATTTAACCCCAAAATCAGTGATTCTACATCTCAAGCTCATATTTTGAAGTGTTTACGG	intergenic							5.33957	2.96366
ASHGA5P053405	0.00420369	0.0381894	5.13956	up	noncoding	ENST00000416952	GAS5	GENCODE	799	chr1	-	173834305	173837126	ATTGGTAAAGGAGATTAAATTTCTACAGGTATGGAGAGTCGGCTTGACTACACTGTGTGG	bidirectional	NM_001122770	ZBTB37	zinc finger and BTB domain-containing protein 37 isoform a	+	173837492	173855774	6.87695	4.51531
ASHGA5P053405	0.00420369	0.0381894	5.13956	up	noncoding	ENST00000416952	GAS5	GENCODE	799	chr1	-	173834305	173837126	ATTGGTAAAGGAGATTAAATTTCTACAGGTATGGAGAGTCGGCTTGACTACACTGTGTGG	bidirectional	NM_032522	ZBTB37	zinc finger and BTB domain-containing protein 37 isoform b	+	173837492	173842778	6.87695	4.51531
ASHGA5P025832	0.0040976	0.0377672	5.1343	up	noncoding	NR_038392	ANAPC16	RefSeq	3083	chr10	+	73975757	73995618	TAAAGCCGCTGAGATGGCTCTGAGAGATTCCTCTGCGAATCTGTTTTTAGCTATCAAGTG	exon sense-overlapping	NM_001242546	ANAPC16	anaphase-promoting complex subunit 16 isoform 1	+	73975757	73995618	5.85415	3.49398
ASHGA5P025832	0.0040976	0.0377672	5.1343	up	noncoding	NR_038392	ANAPC16	RefSeq	3083	chr10	+	73975757	73995618	TAAAGCCGCTGAGATGGCTCTGAGAGATTCCTCTGCGAATCTGTTTTTAGCTATCAAGTG	exon sense-overlapping	NM_001242547	ANAPC16	anaphase-promoting complex subunit 16 isoform 1	+	73975757	73995618	5.85415	3.49398
ASHGA5P025832	0.0040976	0.0377672	5.1343	up	noncoding	NR_038392	ANAPC16	RefSeq	3083	chr10	+	73975757	73995618	TAAAGCCGCTGAGATGGCTCTGAGAGATTCCTCTGCGAATCTGTTTTTAGCTATCAAGTG	exon sense-overlapping	NM_001242548	ANAPC16	anaphase-promoting complex subunit 16 isoform 2	+	73975757	73995618	5.85415	3.49398
ASHGA5P025832	0.0040976	0.0377672	5.1343	up	noncoding	NR_038392	ANAPC16	RefSeq	3083	chr10	+	73975757	73995618	TAAAGCCGCTGAGATGGCTCTGAGAGATTCCTCTGCGAATCTGTTTTTAGCTATCAAGTG	exon sense-overlapping	NM_173473	ANAPC16	anaphase-promoting complex subunit 16 isoform 1	+	73975757	73995618	5.85415	3.49398
ASHGA5P025832	0.0040976	0.0377672	5.1343	up	noncoding	NR_038392	ANAPC16	RefSeq	3083	chr10	+	73975757	73995618	TAAAGCCGCTGAGATGGCTCTGAGAGATTCCTCTGCGAATCTGTTTTTAGCTATCAAGTG	intronic antisense	NM_001198799	ASCC1	activating signal cointegrator 1 complex subunit 1 isoform a	-	73855789	73976199	5.85415	3.49398
ASHGA5P025832	0.0040976	0.0377672	5.1343	up	noncoding	NR_038392	ANAPC16	RefSeq	3083	chr10	+	73975757	73995618	TAAAGCCGCTGAGATGGCTCTGAGAGATTCCTCTGCGAATCTGTTTTTAGCTATCAAGTG	intronic antisense	NM_001198800	ASCC1	activating signal cointegrator 1 complex subunit 1 isoform b	-	73855789	73976199	5.85415	3.49398
ASHGA5P025832	0.0040976	0.0377672	5.1343	up	noncoding	NR_038392	ANAPC16	RefSeq	3083	chr10	+	73975757	73995618	TAAAGCCGCTGAGATGGCTCTGAGAGATTCCTCTGCGAATCTGTTTTTAGCTATCAAGTG	natural antisense	NM_001198798	ASCC1	activating signal cointegrator 1 complex subunit 1 isoform b	-	73855789	73975867	5.85415	3.49398
ASHGA5P044006	0.00666991	0.041722	5.08676	up	noncoding	uc003wgl.2	BC045757	UCSC_knowngene	1870	chr7	+	149535478	149537348	TTTCCAAGCTATTCTGTTCAGTCAGAGGCTTTCTTAGCCTTTAACGGGAGAAGAGAAATA	exon sense-overlapping	NM_001099220	ZNF862	zinc finger protein 862	+	149535508	149564568	6.39522	4.04847
ASHGA5P016768	0.00675977	0.0419286	5.07823	up	noncoding	NR_038367	HOTAIRM1	RefSeq	783	chr7	+	27135712	27139877	CTGGCGAGAGGTCTGTTTTGCCTGAACCCATCAACAGCTGGGAGATTAATCAACCACACT	natural antisense	ENST00000222718	HOXA2	homeobox A2 [Source:HGNC Symbol;Acc:5103]	-	27139720	27142430	9.97358	7.62925
ASHGA5P026745	0.00116611	0.0266156	5.05	up	noncoding	ENST00000526107	RP11-788M5.3	pseudogene	546	chr11	+	101079635	101080181	GAAGATGAAGATGATCTGGCCAAAAGAGAAGATGAGTTCATGGACCTAGGGGATATGTGA								6.73641	4.40013
ASHGA5P047197	0.0118768	0.0503889	5.03556	up	noncoding	uc001igd.3	BC046483	UCSC_knowngene	1206	chr10	+	1094996	1096202	ATTTCCTCTACCTTTTGTGTGGAATTTAAAATACTGAACTTGTGAGATGAACCTGGTGGG	natural antisense	NM_004508	IDI1	isopentenyl-diphosphate Delta-isomerase 1	-	1085963	1095061	5.52688	3.19473
ASHGA5P030514	0.00225159	0.0319402	5.01752	up	noncoding	uc001zvn.1	HMGN2P46	UCSC_knowngene	1682	chr15	+	45803333	45848928	TATGAAACAGCATGCTAAATGTGAAATGTCAACCCTCACTAAACTTTGCCGGTTCAGAGC	natural antisense	NM_013309	SLC30A4	zinc transporter 4	-	45774679	45815002	7.13791	4.81093
ASHGA5P054037	0.00409356	0.0377672	5.01236	up	noncoding	ENST00000415215	JPX	GENCODE	475	chrX	+	73164201	73167265	TTGACGACTGGTATGTTAATTTTGTATATATTTTTATGAGAACAATGTTGGACATCATTT	intergenic							5.04323	2.71774
ASHGA5P019388	0.00557859	0.0401563	5.0118	up	noncoding	NR_033757	MINOS1	RefSeq	3911	chr1	+	19923470	19956315	CACAGCAACTTCTGTACTGGTTTTGGATTAGGAATTGTTTTCTCACTTACCTTCTTTAAA	exon sense-overlapping	NM_001032363	MINOS1	mitochondrial inner membrane organizing system protein 1 isoform a	+	19923470	19956315	6.56137	4.23604
ASHGA5P019388	0.00557859	0.0401563	5.0118	up	noncoding	NR_033757	MINOS1	RefSeq	3911	chr1	+	19923470	19956315	CACAGCAACTTCTGTACTGGTTTTGGATTAGGAATTGTTTTCTCACTTACCTTCTTTAAA	exon sense-overlapping	NM_001204082	MINOS1	mitochondrial inner membrane organizing system protein 1 isoform b	+	19923470	19956315	6.56137	4.23604
ASHGA5P019388	0.00557859	0.0401563	5.0118	up	noncoding	NR_033757	MINOS1	RefSeq	3911	chr1	+	19923470	19956315	CACAGCAACTTCTGTACTGGTTTTGGATTAGGAATTGTTTTCTCACTTACCTTCTTTAAA	exon sense-overlapping	NM_001204083	MINOS1	mitochondrial inner membrane organizing system protein 1 isoform c	+	19923470	19956315	6.56137	4.23604
ASHGA5P019388	0.00557859	0.0401563	5.0118	up	noncoding	NR_033757	MINOS1	RefSeq	3911	chr1	+	19923470	19956315	CACAGCAACTTCTGTACTGGTTTTGGATTAGGAATTGTTTTCTCACTTACCTTCTTTAAA	exon sense-overlapping	NM_001204088	C1orf151-NBL1	C1orf151-NBL1 read-through protein isoform a	+	19923470	19984949	6.56137	4.23604
ASHGA5P019388	0.00557859	0.0401563	5.0118	up	noncoding	NR_033757	MINOS1	RefSeq	3911	chr1	+	19923470	19956315	CACAGCAACTTCTGTACTGGTTTTGGATTAGGAATTGTTTTCTCACTTACCTTCTTTAAA	exon sense-overlapping	NM_001204089	C1orf151-NBL1	C1orf151-NBL1 read-through protein isoform b precursor	+	19923470	19984949	6.56137	4.23604
ASHGA5P014965	0.000702437	0.0225597	5.01144	up	noncoding	uc002dsg.4	RRN3P2	UCSC_knowngene	2265	chr16	+	29086162	29128038	TTCCTCTTATGATTCGGGAACAAAGGCATTCTGCGATGTTGCTCTCCATGGACCATTTTA	intergenic							6.64784	4.32262
ASHGA5P031809	0.00573274	0.0402776	4.99653	up	noncoding	ENST00000570210	RP11-325K4.2	GENCODE	699	chr16	+	56974939	56975638	GAGTGATGGGTCTTCGTGGTTGAAACTAAAAGAAGAAATTTTCCTGTATAGTAAAAATGG	intron sense-overlapping	NM_001010989	HERPUD1	homocysteine-responsive endoplasmic reticulum-resident ubiquitin-like domain member 1 protein isoform 2	+	56965747	56977793	5.53278	3.21186
ASHGA5P031809	0.00573274	0.0402776	4.99653	up	noncoding	ENST00000570210	RP11-325K4.2	GENCODE	699	chr16	+	56974939	56975638	GAGTGATGGGTCTTCGTGGTTGAAACTAAAAGAAGAAATTTTCCTGTATAGTAAAAATGG	intron sense-overlapping	NM_001010990	HERPUD1	homocysteine-responsive endoplasmic reticulum-resident ubiquitin-like domain member 1 protein isoform 3	+	56965747	56977793	5.53278	3.21186
ASHGA5P031809	0.00573274	0.0402776	4.99653	up	noncoding	ENST00000570210	RP11-325K4.2	GENCODE	699	chr16	+	56974939	56975638	GAGTGATGGGTCTTCGTGGTTGAAACTAAAAGAAGAAATTTTCCTGTATAGTAAAAATGG	intron sense-overlapping	NM_014685	HERPUD1	homocysteine-responsive endoplasmic reticulum-resident ubiquitin-like domain member 1 protein isoform 1	+	56965747	56977793	5.53278	3.21186
ASHGA5P037480	0.0394327	0.101315	4.99187	up	noncoding	uc002ywy.3	AK027145	UCSC_knowngene	2046	chr21	+	39645397	39647443	CAGTGTAGTTCCCAATATGGCCTCATACTAACTTCAGATACCCCAGTGTATCTGAAGAAA	intron sense-overlapping	NM_002243	KCNJ15	ATP-sensitive inward rectifier potassium channel 15	+	39628663	39673746	5.50519	3.18561
ASHGA5P037480	0.0394327	0.101315	4.99187	up	noncoding	uc002ywy.3	AK027145	UCSC_knowngene	2046	chr21	+	39645397	39647443	CAGTGTAGTTCCCAATATGGCCTCATACTAACTTCAGATACCCCAGTGTATCTGAAGAAA	intron sense-overlapping	NM_170736	KCNJ15	ATP-sensitive inward rectifier potassium channel 15	+	39628869	39673746	5.50519	3.18561
ASHGA5P037480	0.0394327	0.101315	4.99187	up	noncoding	uc002ywy.3	AK027145	UCSC_knowngene	2046	chr21	+	39645397	39647443	CAGTGTAGTTCCCAATATGGCCTCATACTAACTTCAGATACCCCAGTGTATCTGAAGAAA	intron sense-overlapping	NM_170737	KCNJ15	ATP-sensitive inward rectifier potassium channel 15	+	39644428	39673746	5.50519	3.18561
ASHGA5P048234	0.0215036	0.0697449	4.95546	up	noncoding	ENST00000533502	CTD-3074O7.5	GENCODE	581	chr11	-	66241829	66247663	CTGTACCACAAGGAGCTGCCACTAACACCTGTGTCAGAACTACTGTAAGGACCCTTTCCT	intronic antisense	NM_001098510	PELI3	E3 ubiquitin-protein ligase pellino homolog 3 isoform 2	+	66234335	66244808	6.10334	3.79432
ASHGA5P048234	0.0215036	0.0697449	4.95546	up	noncoding	ENST00000533502	CTD-3074O7.5	GENCODE	581	chr11	-	66241829	66247663	CTGTACCACAAGGAGCTGCCACTAACACCTGTGTCAGAACTACTGTAAGGACCCTTTCCT	intronic antisense	NM_001243135	PELI3	E3 ubiquitin-protein ligase pellino homolog 3 isoform 3	+	66233797	66244808	6.10334	3.79432
ASHGA5P048234	0.0215036	0.0697449	4.95546	up	noncoding	ENST00000533502	CTD-3074O7.5	GENCODE	581	chr11	-	66241829	66247663	CTGTACCACAAGGAGCTGCCACTAACACCTGTGTCAGAACTACTGTAAGGACCCTTTCCT	intronic antisense	NM_001243136	PELI3	E3 ubiquitin-protein ligase pellino homolog 3 isoform 4	+	66234335	66244808	6.10334	3.79432
ASHGA5P048234	0.0215036	0.0697449	4.95546	up	noncoding	ENST00000533502	CTD-3074O7.5	GENCODE	581	chr11	-	66241829	66247663	CTGTACCACAAGGAGCTGCCACTAACACCTGTGTCAGAACTACTGTAAGGACCCTTTCCT	intronic antisense	NM_145065	PELI3	E3 ubiquitin-protein ligase pellino homolog 3 isoform 1	+	66234335	66244808	6.10334	3.79432
ASHGA5P048234	0.0215036	0.0697449	4.95546	up	noncoding	ENST00000533502	CTD-3074O7.5	GENCODE	581	chr11	-	66241829	66247663	CTGTACCACAAGGAGCTGCCACTAACACCTGTGTCAGAACTACTGTAAGGACCCTTTCCT	natural antisense	NM_001256670	DPP3	dipeptidyl peptidase 3 isoform 2	+	66247483	66277130	6.10334	3.79432
ASHGA5P048234	0.0215036	0.0697449	4.95546	up	noncoding	ENST00000533502	CTD-3074O7.5	GENCODE	581	chr11	-	66241829	66247663	CTGTACCACAAGGAGCTGCCACTAACACCTGTGTCAGAACTACTGTAAGGACCCTTTCCT	natural antisense	NM_005700	DPP3	dipeptidyl peptidase 3 isoform 1	+	66247483	66277130	6.10334	3.79432
ASHGA5P048234	0.0215036	0.0697449	4.95546	up	noncoding	ENST00000533502	CTD-3074O7.5	GENCODE	581	chr11	-	66241829	66247663	CTGTACCACAAGGAGCTGCCACTAACACCTGTGTCAGAACTACTGTAAGGACCCTTTCCT	natural antisense	NM_130443	DPP3	dipeptidyl peptidase 3 isoform 1	+	66247483	66277130	6.10334	3.79432
ASHGA5P038645	0.0301345	0.0851839	4.92223	up	noncoding	ENST00000440850	SDHAP1	pseudogene	2000	chr3	-	195690205	195717129	AAGAAGCCCTTTGAGGAGCACTGGAGGAAGCACACCCTGTCCTATGTGGACGTCAGCACT								6.98288	4.68357
ASHGA5P019385	0.00413021	0.03782	4.90362	up	noncoding	ENST00000481220	SNHG12	GENCODE	751	chr1	-	28905052	28908365	GGGCTGACAGATGAAGACTCTTAAGATGACAGAAGGTGATTTTTCTGGTGATCGAGGACT	natural antisense	NM_017846	TRNAU1AP	tRNA selenocysteine 1-associated protein 1	+	28879528	28905057	5.9452	3.65135
ASHGA5P025663	0.00271272	0.0342583	4.87777	up	noncoding	NR_024433	LOC283663	RefSeq	2534	chr15	+	57592562	57599967	CAAGGAGAAGAAATGCCTGGGGCCCACGAACATCCCAGTGTGGCCCTGGACGGGACATCA	intergenic							7.85581	5.56959
ASHGA5P043394	0.00399875	0.0377672	4.86043	up	noncoding	ENST00000517565	RP11-61L23.2	GENCODE	2498	chr7	-	143509063	143533301	AGGGCATATTTTGGGGAGTGATGGGATTATGCACACCCTTCAGGTGTCAAGATAAAGAGA	intergenic							5.28086	2.99977
ASHGA5P020811	0.00362046	0.036686	4.81064	up	noncoding	NR_024084	SAP30L	RefSeq	6287	chr5	+	153825516	153840613	TTAGAGGCAGGTTGATCTGTTCCAGCTGCAGGTGAACACCCTACGACGTTATAAACGACA	exon sense-overlapping	NM_001131062	SAP30L	histone deacetylase complex subunit SAP30L isoform 2	+	153825516	153840613	6.12917	3.86295
ASHGA5P020811	0.00362046	0.036686	4.81064	up	noncoding	NR_024084	SAP30L	RefSeq	6287	chr5	+	153825516	153840613	TTAGAGGCAGGTTGATCTGTTCCAGCTGCAGGTGAACACCCTACGACGTTATAAACGACA	exon sense-overlapping	NM_001131063	SAP30L	histone deacetylase complex subunit SAP30L isoform 3	+	153825516	153840613	6.12917	3.86295
ASHGA5P020811	0.00362046	0.036686	4.81064	up	noncoding	NR_024084	SAP30L	RefSeq	6287	chr5	+	153825516	153840613	TTAGAGGCAGGTTGATCTGTTCCAGCTGCAGGTGAACACCCTACGACGTTATAAACGACA	exon sense-overlapping	NM_024632	SAP30L	histone deacetylase complex subunit SAP30L isoform 1	+	153825516	153840613	6.12917	3.86295
ASHGA5P017086	0.0050887	0.0394114	4.7824	up	noncoding	ENST00000437561	LINC00152	GENCODE	455	chr2	+	87769468	87820932	TTTTATTTGGAATAACTGGGAGATGAAACAGGAAGCTCTATGACACACTTGATCGAATAT	intergenic							6.02428	3.76655
ASHGA5P030138	0.0310781	0.0866822	4.74047	up	noncoding	ENST00000565181	RP11-1007O24.3	GENCODE	2325	chr15	-	72765184	72767509	CCCCTGATTTGTTGATAAATCTTACTGTTCAACCTATAGGTTCCCTTTGGAAATTGATTT	natural antisense	NM_005744	ARIH1	E3 ubiquitin-protein ligase ARIH1	+	72766666	72878896	5.50824	3.26322
ASHGA5P030202	0.00399359	0.0377672	4.73861	up	noncoding	ENST00000560958	RP11-752G15.9	GENCODE	1662	chr15	-	83394624	83407368	TGTATACATCTCATGCTAGCCTTAGGAAACTGGAATAAGCCTTTGAAAAGAAATTTGTCA	intergenic							5.83176	3.5873
ASHGA5P028211	0.00315052	0.0358653	4.71681	up	noncoding	ENST00000501008	RP11-796E2.4	GENCODE	1898	chr12	+	92539348	92561336	GAGGAGTAGGGGGATATCTTTTAAAAGTTTAATTGCAAAATAAGTAGGTTAGTAAGGCCA	natural antisense	NM_001731	BTG1	protein BTG1	-	92534053	92539673	6.20174	3.96393
ASHGA5P058649	0.00446938	0.0386604	4.68676	up	noncoding	uc021zty.1	BC013828	UCSC_knowngene	196	chr6_qbl_hap6	-	2643205	2643563	GCTTGTAAAGCCTGAGGCAGCTGTCTTGTGAGGGACTGAGATGCAGGATTTCTTCACGCC	intergenic							8.70876	6.48017
ASHGA5P019179	0.0103817	0.0475795	4.68405	up	noncoding	NR_003272	PSPC1	RefSeq	1769	chr13	-	20248891	20357159	AAGTACTGGAATCATACTTCCTTTCAGTCTTGCCACTTGCCTAGTGAGGCTTTTCCGAAC	exon sense-overlapping	NM_001042414	PSPC1	paraspeckle component 1	-	20277008	20357159	6.51847	4.29071
ASHGA5P014776	0.0037606	0.0371269	4.67711	up	noncoding	uc010cqz.3	AK310665	UCSC_knowngene	1234	chr17	+	20328041	20334521	TGCAATTTCATGCCATTCAGGAATTCTGAGTGGGGGCCGTTACGTCACTTATGCGAAAAA	intergenic							6.50509	4.27947
ASHGA5P039519	0.00789335	0.0434582	4.66718	up	noncoding	ENST00000563833	AF213884.2	GENCODE	479	chr4	-	103421997	103422476	GAGGGTCGGCATGGATCCAAGCATGCCAGATATAAAAATAAAGCTCATCTGTATATTCCA	bidirectional	NM_001165412	NFKB1	nuclear factor NF-kappa-B p105 subunit isoform 2	+	103422485	103538459	5.73473	3.51218
ASHGA5P039519	0.00789335	0.0434582	4.66718	up	noncoding	ENST00000563833	AF213884.2	GENCODE	479	chr4	-	103421997	103422476	GAGGGTCGGCATGGATCCAAGCATGCCAGATATAAAAATAAAGCTCATCTGTATATTCCA	bidirectional	NM_003998	NFKB1	nuclear factor NF-kappa-B p105 subunit isoform 1	+	103422485	103538459	5.73473	3.51218
ASHGA5P055108	0.00539583	0.0400885	4.64363	up	noncoding	ENST00000531772	RP11-788M5.3	GENCODE	429	chr11	+	101018880	101080322	TCATGGACCTAGGGGATATGTGACCTGTTTATTGAGTGATTGTGAAAGAGGAATGTGGGA	intergenic							5.47026	3.25501
ASHGA5P026854	0.00676605	0.0419286	4.59005	up	noncoding	DQ218281		LincRNAs identified by Khalil et al	2960	chr7	-	26694390	26697338	CTAGTAGTCGCCACTTCTGAAAAGAGTTATCAATTCAAAAGGAATCTTTGTGTTTGCATA	intergenic							5.41625	3.21774
ASHGA5P040780	0.0074503	0.0428256	4.58195	up	noncoding	ENST00000417986	RP11-277L2.2	GENCODE	324	chr1	+	149575481	149615903	AATGTGCCAGTTGATTCTGACAATTTCTCATGAACAGAAACACCTAGGAAGGGAGAACTG	intergenic							7.18034	4.98438
ASHGA5P022872	0.003097	0.0358067	4.57243	up	noncoding	ENST00000564371	CTD-2576F9.2	GENCODE	509	chr15	+	95399235	95400213	CGCCGTGGAGGCACGGCGGAAGGCCGAGGCTGACAAGCCCCGAAGGCTGGGGCGGCTCAA	intergenic							5.36363	3.17067
ASHGA5P022191	0.00431816	0.0383944	4.54998	up	noncoding	ENST00000551898	RP11-493L12.2	GENCODE	359	chr12	-	47599683	47609983	CAGGGAAATGCAGGCTGAGGAATTACCAAGGAGGCAGGAGGTGGAGCAAAACACACCAAG	intronic antisense	ENST00000546455	PCED1B	PC-esterase domain containing 1B [Source:HGNC Symbol;Acc:28255]	+	47473385	47630443	6.61305	4.42719
ASHGA5P019149	0.040326	0.102777	4.53799	up	noncoding	ENST00000488805	RP11-773D16.1	GENCODE	428	chr10	-	81564240	81586160	TTTACTGGTGTTCCAGCCCTAAGAAACCTTTGTTCAAGAAAACGGCAGATGCTCTGTTGA	intergenic							7.67301	5.49096
ASHGA5P023262	0.0286115	0.0823944	4.53701	up	noncoding	NR_037688	ACTG1	RefSeq	1855	chr17	-	79476996	79479892	AAGTTAACTGTTCCCCTTGGGTATTAACGTGTCAGGGCTGAGTGTTCTGGGATTTCTCTA	exon sense-overlapping	NM_001199954	ACTG1	actin, cytoplasmic 2	-	79476996	79479892	9.46848	7.28674
ASHGA5P023262	0.0286115	0.0823944	4.53701	up	noncoding	NR_037688	ACTG1	RefSeq	1855	chr17	-	79476996	79479892	AAGTTAACTGTTCCCCTTGGGTATTAACGTGTCAGGGCTGAGTGTTCTGGGATTTCTCTA	exon sense-overlapping	NM_001614	ACTG1	actin, cytoplasmic 2	-	79476996	79479892	9.46848	7.28674
ASHGA5P052431	0.0168427	0.0605382	4.52269	up	noncoding	NR_033697	NDUFA2	RefSeq	846	chr5	-	140024947	140027370	GGCCCCGCAGGGACTTCATTGAGAAACGCTACGTGGAGCTGAAGAAGGCGAATCCCGACC	exon sense-overlapping	NM_001185012	NDUFA2	NADH dehydrogenase [ubiquinone] 1 alpha subcomplex subunit 2 isoform 2	-	140024947	140027370	7.43205	5.25487
ASHGA5P052431	0.0168427	0.0605382	4.52269	up	noncoding	NR_033697	NDUFA2	RefSeq	846	chr5	-	140024947	140027370	GGCCCCGCAGGGACTTCATTGAGAAACGCTACGTGGAGCTGAAGAAGGCGAATCCCGACC	exon sense-overlapping	NM_002488	NDUFA2	NADH dehydrogenase [ubiquinone] 1 alpha subcomplex subunit 2 isoform 1	-	140024947	140027370	7.43205	5.25487
ASHGA5P052431	0.0168427	0.0605382	4.52269	up	noncoding	NR_033697	NDUFA2	RefSeq	846	chr5	-	140024947	140027370	GGCCCCGCAGGGACTTCATTGAGAAACGCTACGTGGAGCTGAAGAAGGCGAATCCCGACC	natural antisense	NM_018502	TMCO6	transmembrane and coiled-coil domain-containing protein 6	+	140019011	140024989	7.43205	5.25487
ASHGA5P041070	0.00850487	0.0443156	4.51997	up	noncoding	ENST00000514136	RP11-159F24.2	pseudogene	344	chr5	+	43348430	43348774	AATGCCACCATTAAAGTAGCTGGTGGAAATGTTGAACCTTTCTGGCCTGGCTTGTTTGCA								7.20233	5.02601
ASHGA5P018940	0.00381831	0.0374162	4.50314	up	noncoding	ENST00000475441	SNHG12	GENCODE	444	chr1	-	28905049	28907741	ACTTAAGCAGATGAAGACTCTTAAGATGACAGAAGGTGATTTTTCTGGTGATCGAGGACT	natural antisense	NM_017846	TRNAU1AP	tRNA selenocysteine 1-associated protein 1	+	28879528	28905057	6.00943	3.8385
ASHGA5P017603	0.00545755	0.0401017	4.49848	up	noncoding	ENST00000443623	AC058791.2	GENCODE	453	chr7	-	130628926	130668868	CGCAGATGAGACTGAGTGTACTTGGTCTGGTATTTGTGGCATAACTTACGGAACACATAA	intergenic							6.6894	4.51996
ASHGA5P020686	0.00416169	0.0379574	4.4712	up	noncoding	ENST00000518481	CTD-2336O2.1	GENCODE	579	chr8	-	1710790	1711463	GTTTGCTAAGAATCGACATCTAGAGGAGTACTCACCACTTAATTGATGATCAATACACGT	bidirectional	NM_018941	CLN8	protein CLN8	+	1711869	1734736	5.53485	3.37419
ASHGA5P018758	0.00738767	0.0427228	4.44925	up	noncoding	ENST00000457352	NSUN5P2	pseudogene	1482	chr7	-	72419135	72425256	AGATGCCGACTGAGTGGGGGCATGCTTGGGAGGCGCAGGATGGTACTGGCACATCTAACA								5.57727	3.42371
ASHGA5P033478	0.00546776	0.04011	4.44671	up	noncoding	ENST00000579647	CBX3P2	GENCODE	1429	chr18	-	2652168	2655394	GGAAAAGCTTTCTGTAGCTGCTTCATTTACCAGAAAAGAATATTTGGTTCCATGGTATAT	bidirectional	NM_015295	SMCHD1	structural maintenance of chromosomes flexible hinge domain-containing protein 1	+	2655885	2805015	5.33298	3.18024
ASHGA5P020709	0.00370864	0.0369302	4.4397	up	noncoding	ENST00000518822	CTD-2336O2.1	GENCODE	978	chr8	-	1710155	1712505	CAGCGTCGCGAATCGACATCTAGAGGAGTACTCACCACTTAATTGATGATCAATACACGT	intronic antisense	NM_018941	CLN8	protein CLN8	+	1711869	1734736	5.21265	3.06219
ASHGA5P032900	0.00411626	0.0377672	4.43944	up	noncoding	TCONS_00016076	XLOC_007467	LincRNAs identified by Cabili et al	216	chr9	+	97075821	97076871	TATGAATGCTCACACAGAAGCTCTCATTCCTGAGGAATGCAGGGAAAAGCAGAAGATGGA	intergenic							5.32133	3.17095
ASHGA5P016840	0.00311005	0.0358067	4.42138	up	noncoding	uc003spd.2	ZNF815	UCSC_knowngene	1135	chr7	+	5862790	5894066	AGCTTCCCAGAAAGCTGACTTCATGAGACCGAGGATCTCGTTCGTTGATCGATGCTACAT	intergenic							5.44069	3.2962
ASHGA5P051663	0.00479179	0.0390427	4.41319	up	noncoding	ENST00000506593	RPL32P3	GENCODE	498	chr3	-	129115038	129118498	CAATGTCAAGGAGCTGAGAGTGCTGCTGATATGCAACAAGTGAGTTGGGTCCATCTCTGG	intergenic							8.95927	6.81745
ASHGA5P017713	0.00601885	0.0405793	4.40941	up	noncoding	NR_036693	CLEC2D	RefSeq	5255	chr12	+	9822303	9852151	TATCTAAGAGGTTTCCTATCCTGGGAGCAGGAGAGTGTGCCTATTTGAATGACAAAGGTG	exon sense-overlapping	NM_001004419	CLEC2D	C-type lectin domain family 2 member D isoform 2	+	9822303	9852151	6.63895	4.49837
ASHGA5P017713	0.00601885	0.0405793	4.40941	up	noncoding	NR_036693	CLEC2D	RefSeq	5255	chr12	+	9822303	9852151	TATCTAAGAGGTTTCCTATCCTGGGAGCAGGAGAGTGTGCCTATTTGAATGACAAAGGTG	exon sense-overlapping	NM_001197317	CLEC2D	C-type lectin domain family 2 member D isoform 3	+	9822303	9852151	6.63895	4.49837
ASHGA5P017713	0.00601885	0.0405793	4.40941	up	noncoding	NR_036693	CLEC2D	RefSeq	5255	chr12	+	9822303	9852151	TATCTAAGAGGTTTCCTATCCTGGGAGCAGGAGAGTGTGCCTATTTGAATGACAAAGGTG	exon sense-overlapping	NM_001197318	CLEC2D	C-type lectin domain family 2 member D isoform 4	+	9822303	9852151	6.63895	4.49837
ASHGA5P017713	0.00601885	0.0405793	4.40941	up	noncoding	NR_036693	CLEC2D	RefSeq	5255	chr12	+	9822303	9852151	TATCTAAGAGGTTTCCTATCCTGGGAGCAGGAGAGTGTGCCTATTTGAATGACAAAGGTG	exon sense-overlapping	NM_001197319	CLEC2D	C-type lectin domain family 2 member D isoform 5	+	9822303	9852151	6.63895	4.49837
ASHGA5P017713	0.00601885	0.0405793	4.40941	up	noncoding	NR_036693	CLEC2D	RefSeq	5255	chr12	+	9822303	9852151	TATCTAAGAGGTTTCCTATCCTGGGAGCAGGAGAGTGTGCCTATTTGAATGACAAAGGTG	exon sense-overlapping	NM_013269	CLEC2D	C-type lectin domain family 2 member D isoform 1	+	9822303	9852151	6.63895	4.49837
ASHGA5P023079	0.0122969	0.0512842	4.40777	up	noncoding	uc002fqw.3	BC071667	UCSC_knowngene	1618	chr16	+	90244124	90289081	TTACAAAGCTGCCTCGAGCAGAAGAATCCCAGACTTCTTAGAGAACCCAGTGACTTTTTG	intergenic							5.45249	3.31245
ASHGA5P040327	0.0042617	0.0383369	4.40033	up	noncoding	uc001emi.4	BC065231	UCSC_knowngene	507	chr1	+	145004780	145005287	GAGTGAAGGCAATTTTGAAGGCATGACTACGACCTGCTCTGGCCACAAGAGCTAAGAGTT	intronic antisense	NM_001198832	PDE4DIP	myomegalin isoform 8	-	144851423	145039992	5.53878	3.40116
ASHGA5P040327	0.0042617	0.0383369	4.40033	up	noncoding	uc001emi.4	BC065231	UCSC_knowngene	507	chr1	+	145004780	145005287	GAGTGAAGGCAATTTTGAAGGCATGACTACGACCTGCTCTGGCCACAAGAGCTAAGAGTT	intronic antisense	NM_022359	PDE4DIP	myomegalin isoform 3	-	144951760	145076186	5.53878	3.40116
ASHGA5P014824	0.0045206	0.0386604	4.37352	up	noncoding	ENST00000413722	RP11-322M19.1	GENCODE	732	chr10	-	89047713	89102044	ATTAACAGACAAGACACTTTTCAGAAAGACAGGCAACGTGTTGGACCTTCCGGAGCTTCT	intergenic							6.06884	3.94005
ASHGA5P019321	0.0127626	0.0523344	4.37178	up	noncoding	NR_038391	ANAPC16	RefSeq	3017	chr10	+	73975757	73995618	CCTCGTCGTGATGGCTCTGAGAGATTCCTCTGCGAATCTGTTTTTAGCTATCAAGTGGCA	exon sense-overlapping	NM_001242546	ANAPC16	anaphase-promoting complex subunit 16 isoform 1	+	73975757	73995618	6.21641	4.0882
ASHGA5P019321	0.0127626	0.0523344	4.37178	up	noncoding	NR_038391	ANAPC16	RefSeq	3017	chr10	+	73975757	73995618	CCTCGTCGTGATGGCTCTGAGAGATTCCTCTGCGAATCTGTTTTTAGCTATCAAGTGGCA	exon sense-overlapping	NM_001242547	ANAPC16	anaphase-promoting complex subunit 16 isoform 1	+	73975757	73995618	6.21641	4.0882
ASHGA5P019321	0.0127626	0.0523344	4.37178	up	noncoding	NR_038391	ANAPC16	RefSeq	3017	chr10	+	73975757	73995618	CCTCGTCGTGATGGCTCTGAGAGATTCCTCTGCGAATCTGTTTTTAGCTATCAAGTGGCA	exon sense-overlapping	NM_001242548	ANAPC16	anaphase-promoting complex subunit 16 isoform 2	+	73975757	73995618	6.21641	4.0882
ASHGA5P019321	0.0127626	0.0523344	4.37178	up	noncoding	NR_038391	ANAPC16	RefSeq	3017	chr10	+	73975757	73995618	CCTCGTCGTGATGGCTCTGAGAGATTCCTCTGCGAATCTGTTTTTAGCTATCAAGTGGCA	exon sense-overlapping	NM_173473	ANAPC16	anaphase-promoting complex subunit 16 isoform 1	+	73975757	73995618	6.21641	4.0882
ASHGA5P019321	0.0127626	0.0523344	4.37178	up	noncoding	NR_038391	ANAPC16	RefSeq	3017	chr10	+	73975757	73995618	CCTCGTCGTGATGGCTCTGAGAGATTCCTCTGCGAATCTGTTTTTAGCTATCAAGTGGCA	intronic antisense	NM_001198799	ASCC1	activating signal cointegrator 1 complex subunit 1 isoform a	-	73855789	73976199	6.21641	4.0882
ASHGA5P019321	0.0127626	0.0523344	4.37178	up	noncoding	NR_038391	ANAPC16	RefSeq	3017	chr10	+	73975757	73995618	CCTCGTCGTGATGGCTCTGAGAGATTCCTCTGCGAATCTGTTTTTAGCTATCAAGTGGCA	intronic antisense	NM_001198800	ASCC1	activating signal cointegrator 1 complex subunit 1 isoform b	-	73855789	73976199	6.21641	4.0882
ASHGA5P019321	0.0127626	0.0523344	4.37178	up	noncoding	NR_038391	ANAPC16	RefSeq	3017	chr10	+	73975757	73995618	CCTCGTCGTGATGGCTCTGAGAGATTCCTCTGCGAATCTGTTTTTAGCTATCAAGTGGCA	natural antisense	NM_001198798	ASCC1	activating signal cointegrator 1 complex subunit 1 isoform b	-	73855789	73975867	6.21641	4.0882
ASHGA5P053396	0.00576611	0.0403529	4.36715	up	noncoding	ENST00000454813	GAS5	GENCODE	621	chr1	-	173833039	173834009	GATTCTGAGGTTACTCTACTAACAAGCATCACACATTTGTATTTTGCCCTGATTAATATG	intergenic							5.82034	3.69365
ASHGA5P019607	0.00503897	0.039342	4.33635	up	noncoding	ENST00000495430	RP11-773D16.1	GENCODE	829	chr10	-	81564240	81586350	CTAAGGACAACAACCATCTTTCCTGTGAAAAATTCCCTCTCGTACTTTAGTTCTGTGGAT	intergenic							5.94985	3.83337
ASHGA5P016842	0.00453377	0.0386604	4.26887	up	noncoding	ENST00000434914	RP11-160C18.4	GENCODE	392	chr15	+	79044448	79045715	TTTCCTGGGGCTGGAAGCTGATCAGTATCTCCTTTGGGGACCTGAACCCTTTCCCCGTAC	intergenic							8.73639	6.64254
ASHGA5P041804	0.00700285	0.0421497	4.25389	up	noncoding	ENST00000526611	RP1-179N16.6	GENCODE	587	chr6	-	36114474	36164980	TAACACTTAACTACTATAGTGTACCACACAAGGAGAGAGCAGCATTAGAGAGGGGTGCCA	intronic antisense	NM_015695	BRPF3	bromodomain and PHD finger-containing protein 3	+	36164549	36200567	7.43749	5.3487
ASHGA5P039271	0.00153868	0.0285017	4.25119	up	noncoding	ENST00000432047	AC127904.2	GENCODE	557	chr3	+	196640756	196641313	GTTATATAGGAGAAAACATCTAAAGTAGGTAGGGGTAAAATATTGTGATTGATGTCTCCC	intron sense-overlapping	NM_152699	SENP5	sentrin-specific protease 5	+	196594726	196661584	7.30166	5.21379
ASHGA5P030005	0.0051401	0.0396122	4.24351	up	noncoding	uc001zwf.1	AK021664	UCSC_knowngene	2145	chr15	-	48426827	48428972	GGGCCAACATGATAGTGTTGAGACCTGTAATATGGTAAGTTATTATTTCCATTACATTGT	natural antisense	NM_205850	SLC24A5	sodium/potassium/calcium exchanger 5 precursor	+	48413168	48434589	5.12399	3.03873
ASHGA5P034820	0.0204005	0.0677396	4.21249	up	noncoding	ENST00000493504	AC016629.2	GENCODE	3282	chr19	+	59086826	59095764	GTCTAGAATCAGAGTTGGATGAGAAATCAACTTTGAACACCACCTTTGGGGTGGCTGCAT	intergenic							6.92073	4.84606
ASHGA5P018733	0.00496836	0.0392301	4.21227	up	noncoding	ENST00000457025	RP4-717I23.3	GENCODE	413	chr1	-	93730196	93804088	GGACTAAATTGAGGGCTCTGAGAGATTTCATTTCTGTCCTGCTGATGAAGTCTACGTTCA	natural antisense	NM_206886	CCDC18	coiled-coil domain-containing protein 18	+	93646280	93744287	5.75823	3.68363
ASHGA5P035174	0.00669716	0.041722	4.20304	up	noncoding	ENST00000411738	AC159540.1	GENCODE	724	chr2	-	98081773	98089122	AGTATTCCTGGTCTCGAATCATCCTGATATTCTTCATTTTGTTATTCACATTGGACTAGG	intergenic							7.0716	5.00016
ASHGA5P034742	0.0476846	0.114148	4.19409	up	noncoding	ENST00000573896	LINC00085	GENCODE	554	chr19	+	52207573	52215640	TGAGTGAGTGAACTCTGTGCGAGATAAATTGGAGACAAATATGGACAACTCTCCCAAGGA	intergenic							6.52996	4.4616
ASHGA5P043694	0.00621754	0.0409695	4.16239	up	noncoding	uc003ttf.3	BC053669	UCSC_knowngene	2761	chr7	+	64141510	64147264	ACGGGTTTCTGTTCCAACTGGTTGATCAACTTCTTGAGTCAACAAGTCCCAAAACCATGT	intron sense-overlapping	NM_001013746	ZNF107	zinc finger protein 107	+	64126510	64171401	5.6568	3.59939
ASHGA5P043694	0.00621754	0.0409695	4.16239	up	noncoding	uc003ttf.3	BC053669	UCSC_knowngene	2761	chr7	+	64141510	64147264	ACGGGTTTCTGTTCCAACTGGTTGATCAACTTCTTGAGTCAACAAGTCCCAAAACCATGT	intron sense-overlapping	NM_016220	ZNF107	zinc finger protein 107	+	64126510	64171401	5.6568	3.59939
ASHGA5P028495	0.00344583	0.0361534	4.1616	up	noncoding	TCONS_00010587	XLOC_005110	LincRNAs identified by Cabili et al	982	chr5	-	180257007	180258290	AGATGGAGAGACCAGTTGATCGGTCACACAAGCTGTTCCACGATAATTCTTGTGTCAGAA	intergenic							6.28281	4.22567
ASHGA5P014767	0.00477781	0.0390427	4.15863	up	noncoding	ENST00000413202	LINC00152	GENCODE	422	chr2	+	87808732	87821033	TTTCGACGAGAATAACTGGGAGATGAAACAGGAAGCTCTATGACACACTTGATCGAATAT	intergenic							6.00898	3.95287
ASHGA5P048911	0.00523189	0.0398493	4.15774	up	noncoding	NR_037602	LOC100507217	RefSeq	1497	chr15	+	93426525	93441977	AAGTTTAATTAAATGTTTAGTTTTATTTTAGTAATACTTTGGCCTTTGTAGTTGCCGAGT	exon sense-overlapping	ENST00000556722	CHD2	chromodomain helicase DNA binding protein 2 [Source:HGNC Symbol;Acc:1917]	+	93426525	93480855	5.38379	3.32799
ASHGA5P028719	0.00492534	0.0391245	4.15711	up	noncoding	uc001ela.4	LOC728875	UCSC_knowngene	1257	chr1	-	144480744	144521009	AGACGTACAGGCGGGATCTTCTGGAAGTGAGAATTGTTTTTGTTTGTTTATCTATTGTAG	natural antisense	ENST00000538264	AL592284.2	Uncharacterized protein [Source:UniProtKB/TrEMBL;Acc:F5H305]	+	144339737	144521058	7.03118	4.9756
ASHGA5P027814	0.0101343	0.0471188	4.15321	up	noncoding	NR_036466	LOC100499405	RefSeq	2469	chr12	+	9392598	9395645	GGTCATACGCTCAGGGAATGTTTATTATTGGAACAATTTAACCTACCAGCTTGTTATTTT	intergenic							5.5376	3.48337
ASHGA5P055367	0.00243399	0.0329571	4.14647	up	noncoding	ENST00000552269	RP11-493L12.2	GENCODE	673	chr12	-	47599680	47610191	TGGCTCTTATTGTTCTTGCTGGTGTGGTATGTTCACGGCTGAAAAGATGGTCAGAAGGGG	natural antisense	NM_138371	PCED1B	protein FAM113B	+	47610051	47630443	5.54358	3.4917
ASHGA5P042162	0.00530691	0.0400885	4.12311	up	noncoding	NR_024277	AGPAT4-IT1	RefSeq	1869	chr6	-	161581163	161583014	TTTTCCTCTCAGCATCAGAGAAGGCAGAAAGCAAGAGAAAGGAATGCAATGTGAGCAAGG	intron sense-overlapping	NM_020133	AGPAT4	1-acyl-sn-glycerol-3-phosphate acyltransferase delta	-	161551056	161695107	5.86464	3.8209
ASHGA5P033295	0.0064348	0.0410595	4.10922	up	noncoding	ENST00000451795	RP5-827C21.4	GENCODE	575	chr1	-	234508552	234509339	CAGCAAGGTATTTTTAAAAGGGATGAAGAGAGTTGCTTCAAATGTTTTGAGACGTTGTTA	natural antisense	NM_001206641	C1orf31	uncharacterized protein C1orf31 isoform 2	+	234509213	234519795	5.57356	3.5347
ASHGA5P030071	0.0229798	0.0722269	4.10278	up	noncoding	TCONS_00008016	XLOC_003481	LincRNAs identified by Cabili et al	229	chr4	+	26784348	26784724	CCTTGTGACAACAAAAGACAACTCAAATCAGCTTCAAGCATGGATCATAACTAACCGCGG	intergenic							5.61116	3.57456
ASHGA5P016489	0.00886822	0.044916	4.08432	up	noncoding	ENST00000430893	AC159540.1	GENCODE	522	chr2	-	98088651	98089794	AGAAGCCAAGTTTCTCCACAGACACTACCCAAAGCAGTGCTTCACTACAGTGGCAGACAG	intergenic							6.58269	4.55259
ASHGA5P040391	0.00477353	0.0390427	4.07804	up	noncoding	ENST00000514048	RP11-1023L17.1	GENCODE	5001	chr5	-	34164802	34189619	ATGAAGTGAGTACCTGGAGGAACTCCTACATTTTAGGCTTTCAAAGGTTACAGGCTTTTC	intergenic							5.80246	3.77459
ASHGA5P019364	0.00349955	0.036217	4.06629	up	noncoding	ENST00000479920	RP11-506M13.3	GENCODE	448	chr10	+	81420644	81430911	TTATTTCAAGGCTCATATGACATTAACAGACAAGACACTTTTCAGAAAGACAGGTAAGTC	intergenic							5.45554	3.43183
ASHGA5P049901	0.00570101	0.0402776	4.05268	up	noncoding	ENST00000519013	RP11-62H7.2	pseudogene	301	chr8	+	8819266	8819567	GGCCGCCAGAATATCCACTTCTCAGAGAAGTGGGACTTTACCAAGTTCAGTGTGGATGAA								8.50268	6.4838
ASHGA5P018604	0.00491286	0.0391245	4.03844	up	noncoding	ENST00000455474	RP4-717I23.3	GENCODE	299	chr1	-	93730206	93803026	GGTATTGAAAGAGGGCTCTGAGAGATTTCATTTCTGTCCTGCTGATGAAGTCTACGTTCA	natural antisense	NM_206886	CCDC18	coiled-coil domain-containing protein 18	+	93646280	93744287	5.73749	3.72369
ASHGA5P018571	0.00481991	0.0391245	4.02823	up	noncoding	ENST00000455131	LINC00152	GENCODE	733	chr2	+	87755023	87820932	GGTGCTTCAGAATAACTGGGAGATGAAACAGGAAGCTCTATGACACACTTGATCGAATAT	intergenic							6.03741	4.02726
ASHGA5P015373	0.00409318	0.0377672	4.02541	up	noncoding	ENST00000419697	RP11-773D16.1	GENCODE	513	chr10	-	81563812	81574410	CAGCCCTAAGGCTCATATGACATTAACAGACAAGACACTTTTCAGAAAGACAGGTAAGTC	intergenic							5.75078	3.74165
ASHGA5P032616	0.0108157	0.0485311	4.0235	up	noncoding	ENST00000577698	RP11-147L13.2	GENCODE	1310	chr17	-	66242769	66244079	TGTTCACTCTCCTGGATCATGAATTCTCCAAATTTGTCCTTTGAACCCAGTGCCCATATC	natural antisense	ENST00000359904	AMZ2	archaelysin family metallopeptidase 2 [Source:HGNC Symbol;Acc:28041]	+	66243714	66253297	7.21162	5.20317
ASHGA5P032616	0.0108157	0.0485311	4.0235	up	noncoding	ENST00000577698	RP11-147L13.2	GENCODE	1310	chr17	-	66242769	66244079	TGTTCACTCTCCTGGATCATGAATTCTCCAAATTTGTCCTTTGAACCCAGTGCCCATATC	natural antisense	ENST00000580548	AMZ2	archaelysin family metallopeptidase 2 [Source:HGNC Symbol;Acc:28041]	+	66244070	66247319	7.21162	5.20317
ASHGA5P041309	0.00400234	0.0377672	3.99059	up	noncoding	ENST00000507558	CTB-118N6.3	GENCODE	436	chr5	+	115806885	115808334	GAGCATTATTCCTTTGTCTTGGATATACTTATGTTCAAAAGCAATTTCTTCTCCCTCAAG	intronic antisense	NM_020796	SEMA6A	semaphorin-6A precursor	-	115779250	115910551	5.62155	3.62495
ASHGA5P032131	0.00497978	0.0392352	3.95424	up	noncoding	ENST00000573222	RP11-589P10.5	GENCODE	343	chr17	-	6897960	6898508	AGATCTTGATTCAAGTGATTATATGCATTTGGATCTCCGTGGATGCATCTGGTGGCCTGG	intron sense-overlapping	ENST00000399541	MIR497HG	mir-497-195 cluster host gene (non-protein coding) [Source:HGNC Symbol;Acc:39523]	-	6888427	6915653	5.84789	3.86449
ASHGA5P032131	0.00497978	0.0392352	3.95424	up	noncoding	ENST00000573222	RP11-589P10.5	GENCODE	343	chr17	-	6897960	6898508	AGATCTTGATTCAAGTGATTATATGCATTTGGATCTCCGTGGATGCATCTGGTGGCCTGG	intron sense-overlapping	ENST00000575889	MIR497HG	mir-497-195 cluster host gene (non-protein coding) [Source:HGNC Symbol;Acc:39523]	-	6780106	6915636	5.84789	3.86449
ASHGA5P047024	0.004006	0.0377672	3.94348	up	noncoding	DB308427		LincRNAs identified by Khalil et al	530	chr19	+	30528701	30529228	TTCCTGCAACATCAGCAGTTCAGAATGTTCTGATTAATCCATCATTAATTGGGTCCAAAA	intergenic							7.03171	5.05224
ASHGA5P029642	0.00859162	0.0443672	3.94303	up	noncoding	NR_027046	LOC145474	RefSeq	1859	chr14	+	71954577	71956420	ATATATTCTTCAGTGTGATTTAGGTGAGTCAGGAATTTTTCCTCTGGAGACTGCCTAAAT	intron sense-overlapping	ENST00000557151	SIPA1L1	signal-induced proliferation-associated 1 like 1 [Source:HGNC Symbol;Acc:20284]	+	71788107	72054686	6.43255	4.45324
ASHGA5P013202	0.0052428	0.0398548	3.92357	up	noncoding	NR_047512	APBB1	RefSeq	2267	chr11	-	6416354	6440332	TGCGTGCATGGTGGAACAGGAGGAACTGGTCCAGGCCAGGCCTCATCCTCCTGGACCCAG	exon sense-overlapping	NM_001164	APBB1	amyloid beta A4 precursor protein-binding family B member 1 isoform a	-	6416354	6440332	5.53076	3.55859
ASHGA5P013202	0.0052428	0.0398548	3.92357	up	noncoding	NR_047512	APBB1	RefSeq	2267	chr11	-	6416354	6440332	TGCGTGCATGGTGGAACAGGAGGAACTGGTCCAGGCCAGGCCTCATCCTCCTGGACCCAG	exon sense-overlapping	NM_001257319	APBB1	amyloid beta A4 precursor protein-binding family B member 1 isoform g	-	6416354	6426163	5.53076	3.55859
ASHGA5P013202	0.0052428	0.0398548	3.92357	up	noncoding	NR_047512	APBB1	RefSeq	2267	chr11	-	6416354	6440332	TGCGTGCATGGTGGAACAGGAGGAACTGGTCCAGGCCAGGCCTCATCCTCCTGGACCCAG	exon sense-overlapping	NM_001257320	APBB1	amyloid beta A4 precursor protein-binding family B member 1 isoform d	-	6416354	6426891	5.53076	3.55859
ASHGA5P013202	0.0052428	0.0398548	3.92357	up	noncoding	NR_047512	APBB1	RefSeq	2267	chr11	-	6416354	6440332	TGCGTGCATGGTGGAACAGGAGGAACTGGTCCAGGCCAGGCCTCATCCTCCTGGACCCAG	exon sense-overlapping	NM_001257321	APBB1	amyloid beta A4 precursor protein-binding family B member 1 isoform d	-	6416354	6426891	5.53076	3.55859
ASHGA5P013202	0.0052428	0.0398548	3.92357	up	noncoding	NR_047512	APBB1	RefSeq	2267	chr11	-	6416354	6440332	TGCGTGCATGGTGGAACAGGAGGAACTGGTCCAGGCCAGGCCTCATCCTCCTGGACCCAG	exon sense-overlapping	NM_001257322	APBB1	amyloid beta A4 precursor protein-binding family B member 1 isoform h	-	6422281	6426163	5.53076	3.55859
ASHGA5P013202	0.0052428	0.0398548	3.92357	up	noncoding	NR_047512	APBB1	RefSeq	2267	chr11	-	6416354	6440332	TGCGTGCATGGTGGAACAGGAGGAACTGGTCCAGGCCAGGCCTCATCCTCCTGGACCCAG	exon sense-overlapping	NM_001257323	APBB1	amyloid beta A4 precursor protein-binding family B member 1 isoform f	-	6416354	6426163	5.53076	3.55859
ASHGA5P013202	0.0052428	0.0398548	3.92357	up	noncoding	NR_047512	APBB1	RefSeq	2267	chr11	-	6416354	6440332	TGCGTGCATGGTGGAACAGGAGGAACTGGTCCAGGCCAGGCCTCATCCTCCTGGACCCAG	exon sense-overlapping	NM_001257324	APBB1	amyloid beta A4 precursor protein-binding family B member 1 isoform c	-	6422281	6440332	5.53076	3.55859
ASHGA5P013202	0.0052428	0.0398548	3.92357	up	noncoding	NR_047512	APBB1	RefSeq	2267	chr11	-	6416354	6440332	TGCGTGCATGGTGGAACAGGAGGAACTGGTCCAGGCCAGGCCTCATCCTCCTGGACCCAG	exon sense-overlapping	NM_001257325	APBB1	amyloid beta A4 precursor protein-binding family B member 1 isoform e	-	6416354	6425894	5.53076	3.55859
ASHGA5P013202	0.0052428	0.0398548	3.92357	up	noncoding	NR_047512	APBB1	RefSeq	2267	chr11	-	6416354	6440332	TGCGTGCATGGTGGAACAGGAGGAACTGGTCCAGGCCAGGCCTCATCCTCCTGGACCCAG	exon sense-overlapping	NM_001257326	APBB1	amyloid beta A4 precursor protein-binding family B member 1 isoform d	-	6416354	6426891	5.53076	3.55859
ASHGA5P013202	0.0052428	0.0398548	3.92357	up	noncoding	NR_047512	APBB1	RefSeq	2267	chr11	-	6416354	6440332	TGCGTGCATGGTGGAACAGGAGGAACTGGTCCAGGCCAGGCCTCATCCTCCTGGACCCAG	exon sense-overlapping	NM_145689	APBB1	amyloid beta A4 precursor protein-binding family B member 1 isoform b	-	6416354	6440644	5.53076	3.55859
ASHGA5P045168	0.0208237	0.0684923	3.92297	up	noncoding	ENST00000436039	RP4-781K5.2	GENCODE	693	chr1	+	234742753	234745229	TTTTTCACTTTCACATCTCCAGCAAGGATGGTTGCAATTTCCCCTTGCATAAAGGCCCAG	natural antisense	NM_001077397	IRF2BP2	interferon regulatory factor 2-binding protein 2 isoform B	-	234740014	234745271	7.12101	5.14906
ASHGA5P045168	0.0208237	0.0684923	3.92297	up	noncoding	ENST00000436039	RP4-781K5.2	GENCODE	693	chr1	+	234742753	234745229	TTTTTCACTTTCACATCTCCAGCAAGGATGGTTGCAATTTCCCCTTGCATAAAGGCCCAG	natural antisense	NM_182972	IRF2BP2	interferon regulatory factor 2-binding protein 2 isoform A	-	234740014	234745271	7.12101	5.14906
ASHGA5P022034	0.00643032	0.0410595	3.915	up	noncoding	ENST00000547626	RP11-493L12.2	GENCODE	420	chr12	-	47599680	47603157	TTGGGATTACAGCAGGCTGAGGAATTACCAAGGAGGCAGGAGGTGGAGCAAAACACACCA	intronic antisense	ENST00000546455	PCED1B	PC-esterase domain containing 1B [Source:HGNC Symbol;Acc:28255]	+	47473385	47630443	6.50153	4.53251
ASHGA5P016376	0.00589283	0.0404119	3.90778	up	noncoding	ENST00000446528	RP4-717I23.3	GENCODE	489	chr1	-	93730201	93792474	CAACATACAAGAGGGCTCTGAGAGATTTCATTTCTGTCCTGCTGATGAAGTCTACGTTCA	natural antisense	NM_206886	CCDC18	coiled-coil domain-containing protein 18	+	93646280	93744287	5.85691	3.89056
ASHGA5P020079	0.00490263	0.0391245	3.88173	up	noncoding	uc003jcp.4	LOC728613	UCSC_knowngene	3701	chr5	-	1597671	1634120	GCTGACATTTCTTGCGCACGTGGACTCCCTTTAATCCAGTGACTGTCAGGTCGATCATAT	intergenic							5.60354	3.64684
ASHGA5P013973	0.00500386	0.0392352	3.8614	up	noncoding	uc002ije.3	LRRC37A4	UCSC_knowngene	2746	chr17	-	43578683	43592891	GGAGAGTCAGACGGCCGCTCTGGCTTAAAGATATGTACAAACCTCTCAGTGCCACAAGAG	intronic antisense	ENST00000253803	AC091132.2	Uncharacterized protein [Source:UniProtKB/TrEMBL;Acc:H7BXE8]	+	43580625	43611631	6.41878	4.46965
ASHGA5P017215	0.0056967	0.0402776	3.81909	up	noncoding	ENST00000438935	AC007390.6	GENCODE	367	chr2	+	37440609	37443336	CTAACTGTGGTTTCAACTGTCTAAGGTTTATACTTACCAGGAAGATGACGAATATCCTTA	natural antisense	NM_005760	CEBPZ	CCAAT/enhancer-binding protein zeta	-	37428774	37458740	5.50359	3.57036
ASHGA5P036965	0.00632794	0.0410595	3.81859	up	noncoding	NR_026885	LOC100270804	RefSeq	2034	chr20	+	18774692	18776709	GCTGACATCATTGGAAAAGTGCATCACTTAGAAAATGTATCTGTGTGTCAATTTTGTTTG	intergenic							6.69787	4.76482
ASHGA5P055366	0.00425032	0.0383369	3.80018	up	noncoding	ENST00000548222	RP11-493L12.2	GENCODE	625	chr12	-	47599684	47610032	ACGGCTGAAAAGATGGTCAGAAGGGGAAAGGAGGAAGTGAGAAGAAAGAAACAGGGAAAT	natural antisense	ENST00000546455	PCED1B	PC-esterase domain containing 1B [Source:HGNC Symbol;Acc:28255]	+	47473385	47630443	5.30135	3.37528
ASHGA5P028645	0.011714	0.0499143	3.79564	up	noncoding	ENST00000432229	FARP1-AS1	GENCODE	323	chr13	-	99087658	99088094	CCCTGCACAGTATTCAAAGGTGTCTTTTGAGCAAAAACAGTGCTATTTCTCTATAATAAA	natural antisense	NM_005766	FARP1	FERM, RhoGEF and pleckstrin domain-containing protein 1 isoform 1	+	98795433	99102023	6.07737	4.15302
ASHGA5P019198	0.0022619	0.0319402	3.79192	up	noncoding	NR_045213	FCGR1B	RefSeq	2202	chr1	-	120926127	120935944	CAAGTGCTTGGCCTCCAGTTACCAACTCCTGTCTGGTTTCATGTCCTTTTCTATCTGGCA	exon sense-overlapping	NM_001004340	FCGR1B	high affinity immunoglobulin gamma Fc receptor IB isoform 2 precursor	-	120926127	120935944	7.67641	5.75348
ASHGA5P019198	0.0022619	0.0319402	3.79192	up	noncoding	NR_045213	FCGR1B	RefSeq	2202	chr1	-	120926127	120935944	CAAGTGCTTGGCCTCCAGTTACCAACTCCTGTCTGGTTTCATGTCCTTTTCTATCTGGCA	exon sense-overlapping	NM_001017986	FCGR1B	high affinity immunoglobulin gamma Fc receptor IB isoform 1 precursor	-	120926127	120935944	7.67641	5.75348
ASHGA5P019198	0.0022619	0.0319402	3.79192	up	noncoding	NR_045213	FCGR1B	RefSeq	2202	chr1	-	120926127	120935944	CAAGTGCTTGGCCTCCAGTTACCAACTCCTGTCTGGTTTCATGTCCTTTTCTATCTGGCA	exon sense-overlapping	NM_001244910	FCGR1B	high affinity immunoglobulin gamma Fc receptor IB isoform 3 precursor	-	120927646	120935944	7.67641	5.75348
ASHGA5P018089	0.0250411	0.0761031	3.77592	up	noncoding	ENST00000449289	GAS5	GENCODE	542	chr1	-	173833037	173837127	AACGTTTTTATCCATGGATGACTTGCTTGGGACTCAGAATTCATGATTGAAGAAATGCAG	bidirectional	NM_001122770	ZBTB37	zinc finger and BTB domain-containing protein 37 isoform a	+	173837492	173855774	9.8056	7.88877
ASHGA5P018089	0.0250411	0.0761031	3.77592	up	noncoding	ENST00000449289	GAS5	GENCODE	542	chr1	-	173833037	173837127	AACGTTTTTATCCATGGATGACTTGCTTGGGACTCAGAATTCATGATTGAAGAAATGCAG	bidirectional	NM_032522	ZBTB37	zinc finger and BTB domain-containing protein 37 isoform b	+	173837492	173842778	9.8056	7.88877
ASHGA5P042206	0.00422248	0.0382095	3.77088	up	noncoding	ENST00000534160	RP1-80B9.2	GENCODE	720	chr6	+	2306526	2352936	AGTCCCAAGTCTGCAAGAAGGGGGATCTTTTCTTGAAAACCTACAGTGCTAATAATTGTC	intergenic							6.66206	4.74716
ASHGA5P018968	0.0152591	0.0572434	3.76338	up	noncoding	ENST00000462717	RP11-245J9.4	GENCODE	441	chr3	+	63997639	64001922	AAACCTTGGGATACCAGCCTTCCATTTTGTGCATATAATAAACGAGTAAAAGGCCGGGCG	intronic antisense	NM_014814	PSMD6	26S proteasome non-ATPase regulatory subunit 6	-	63996230	64009120	7.55887	5.64684
ASHGA5P030921	0.00562434	0.0402473	3.75563	up	noncoding	ENST00000576810	RP11-462G12.1	GENCODE	1394	chr16	-	3997609	4000445	CCGTGTATATTCCTTGGTAATCGTTGAATTTTAAGCCATATGAATGCATTGTCTACTCAA	intergenic							5.94226	4.03321
ASHGA5P032027	0.00807476	0.0437937	3.74344	up	noncoding	ENST00000423684	AFG3L1P	GENCODE	595	chr16	+	90044101	90051109	TTATTTCGTGTAAAAATGTAGTTTTCTATTTTTTTCAGTAAAATACTCCCTTAGTATCCA	intergenic							5.92985	4.02549
ASHGA5P035134	0.00668556	0.041722	3.74003	up	noncoding	NR_038942	LOC100630918	RefSeq	1432	chr2	-	85764589	85766009	GCAGCAAGAAAAGGTTCGACCACAAAAGAGACAATAGGTGATGATATTTTTATTCGTTGC	bidirectional	NM_005911	MAT2A	S-adenosylmethionine synthase isoform type-2	+	85766100	85772403	5.833	3.92995
ASHGA5P045701	0.000240722	0.014798	3.72679	up	noncoding	ENST00000431981	RP11-112J3.16	GENCODE	472	chr9	+	35772307	35790429	GACTGTATTTTCACAAAGCTGATATTTCTGGCCCTTAGAATATGATACCTGTTTGTCTAA	intergenic							5.60653	3.7086
ASHGA5P037759	0.0194806	0.0658952	3.71406	up	noncoding	ENST00000564152	CTA-29F11.1	GENCODE	670	chr22	-	47157790	47158460	GCTTGAAGGGAAGAATGGTTTGAGCACCGAGGACAAGAATTAATTCCCCAGGCCTGGGTT	bidirectional	NM_014346	TBC1D22A	TBC1 domain family member 22A	+	47158517	47571342	6.32654	4.43354
ASHGA5P048794	0.00970173	0.0463839	3.71181	up	noncoding	NR_045207	LOC729739	RefSeq	490	chr15	+	74653892	74654382	TGGATCCAATACAAACGGTTCCCAGTTTTTCATCTGCACTGACAAGACTGAGTGGTGGAT	intronic antisense	ENST00000268053	CYP11A1	cytochrome P450, family 11, subfamily A, polypeptide 1 [Source:HGNC Symbol;Acc:2590]	-	74630099	74660081	8.34941	6.45729
ASHGA5P048794	0.00970173	0.0463839	3.71181	up	noncoding	NR_045207	LOC729739	RefSeq	490	chr15	+	74653892	74654382	TGGATCCAATACAAACGGTTCCCAGTTTTTCATCTGCACTGACAAGACTGAGTGGTGGAT	intronic antisense	ENST00000358632	CYP11A1	cytochrome P450, family 11, subfamily A, polypeptide 1 [Source:HGNC Symbol;Acc:2590]	-	74630099	74658547	8.34941	6.45729
ASHGA5P048794	0.00970173	0.0463839	3.71181	up	noncoding	NR_045207	LOC729739	RefSeq	490	chr15	+	74653892	74654382	TGGATCCAATACAAACGGTTCCCAGTTTTTCATCTGCACTGACAAGACTGAGTGGTGGAT	intronic antisense	ENST00000416978	CYP11A1	cytochrome P450, family 11, subfamily A, polypeptide 1 [Source:HGNC Symbol;Acc:2590]	-	74637551	74659987	8.34941	6.45729
ASHGA5P048794	0.00970173	0.0463839	3.71181	up	noncoding	NR_045207	LOC729739	RefSeq	490	chr15	+	74653892	74654382	TGGATCCAATACAAACGGTTCCCAGTTTTTCATCTGCACTGACAAGACTGAGTGGTGGAT	intronic antisense	ENST00000419019	CYP11A1	cytochrome P450, family 11, subfamily A, polypeptide 1 [Source:HGNC Symbol;Acc:2590]	-	74630102	74658499	8.34941	6.45729
ASHGA5P048794	0.00970173	0.0463839	3.71181	up	noncoding	NR_045207	LOC729739	RefSeq	490	chr15	+	74653892	74654382	TGGATCCAATACAAACGGTTCCCAGTTTTTCATCTGCACTGACAAGACTGAGTGGTGGAT	intronic antisense	ENST00000433240	CYP11A1	cytochrome P450, family 11, subfamily A, polypeptide 1 [Source:HGNC Symbol;Acc:2590]	-	74637420	74659987	8.34941	6.45729
ASHGA5P048794	0.00970173	0.0463839	3.71181	up	noncoding	NR_045207	LOC729739	RefSeq	490	chr15	+	74653892	74654382	TGGATCCAATACAAACGGTTCCCAGTTTTTCATCTGCACTGACAAGACTGAGTGGTGGAT	intronic antisense	ENST00000450547	CYP11A1	cytochrome P450, family 11, subfamily A, polypeptide 1 [Source:HGNC Symbol;Acc:2590]	-	74636196	74658519	8.34941	6.45729
ASHGA5P048794	0.00970173	0.0463839	3.71181	up	noncoding	NR_045207	LOC729739	RefSeq	490	chr15	+	74653892	74654382	TGGATCCAATACAAACGGTTCCCAGTTTTTCATCTGCACTGACAAGACTGAGTGGTGGAT	intronic antisense	ENST00000541301	CYP11A1	cytochrome P450, family 11, subfamily A, polypeptide 1 [Source:HGNC Symbol;Acc:2590]	-	74632075	74659987	8.34941	6.45729
ASHGA5P048794	0.00970173	0.0463839	3.71181	up	noncoding	NR_045207	LOC729739	RefSeq	490	chr15	+	74653892	74654382	TGGATCCAATACAAACGGTTCCCAGTTTTTCATCTGCACTGACAAGACTGAGTGGTGGAT	intronic antisense	ENST00000569662	CYP11A1	cytochrome P450, family 11, subfamily A, polypeptide 1 [Source:HGNC Symbol;Acc:2590]	-	74637455	74658499	8.34941	6.45729
ASHGA5P048794	0.00970173	0.0463839	3.71181	up	noncoding	NR_045207	LOC729739	RefSeq	490	chr15	+	74653892	74654382	TGGATCCAATACAAACGGTTCCCAGTTTTTCATCTGCACTGACAAGACTGAGTGGTGGAT	intronic antisense	NM_000781	CYP11A1	cholesterol side-chain cleavage enzyme, mitochondrial isoform a precursor	-	74630102	74660081	8.34941	6.45729
ASHGA5P048794	0.00970173	0.0463839	3.71181	up	noncoding	NR_045207	LOC729739	RefSeq	490	chr15	+	74653892	74654382	TGGATCCAATACAAACGGTTCCCAGTTTTTCATCTGCACTGACAAGACTGAGTGGTGGAT	intronic antisense	NM_001099773	CYP11A1	cholesterol side-chain cleavage enzyme, mitochondrial isoform b	-	74630102	74658553	8.34941	6.45729
ASHGA5P039312	0.00583647	0.0403622	3.71049	up	noncoding	ENST00000510506	FAM86EP	pseudogene	987	chr4	-	3945000	3957146	ACCAGAAACTGTTTCCCTACAAAGAGCACTTGGAGATGGCAATGCTGAACCTAATACTGT								5.66005	3.76845
ASHGA5P015411	0.00759059	0.0431256	3.69701	up	noncoding	NR_024420	LOC389634	RefSeq	682	chr12	-	8509559	8543348	CGGCAGAGGAATAACTTCACTCTTCTCTGCAACGAATCCCAAAAGTATATAATTGAGCTG	intergenic							6.82767	4.94131
ASHGA5P018333	0.00624603	0.0409695	3.69177	up	noncoding	ENST00000452197	GAS5	GENCODE	483	chr1	-	173833038	173837121	ATTGGCACACAGGTATGGAGAGTCGGCTTGACTACACTGTGTGGAGCAAGTTTTAAAGAA	bidirectional	NM_001122770	ZBTB37	zinc finger and BTB domain-containing protein 37 isoform a	+	173837492	173855774	7.90946	6.02515
ASHGA5P018333	0.00624603	0.0409695	3.69177	up	noncoding	ENST00000452197	GAS5	GENCODE	483	chr1	-	173833038	173837121	ATTGGCACACAGGTATGGAGAGTCGGCTTGACTACACTGTGTGGAGCAAGTTTTAAAGAA	bidirectional	NM_032522	ZBTB37	zinc finger and BTB domain-containing protein 37 isoform b	+	173837492	173842778	7.90946	6.02515
ASHGA5P053403	0.00578494	0.0403622	3.6894	up	noncoding	ENST00000455838	GAS5	GENCODE	632	chr1	-	173834092	173837127	ACTACACTGTGTGGAGCAAGTTTTAAAGAAGCAAAGGTATAGCAGTTCCAAGTATTTTTT	bidirectional	NM_001122770	ZBTB37	zinc finger and BTB domain-containing protein 37 isoform a	+	173837492	173855774	7.25499	5.3716
ASHGA5P053403	0.00578494	0.0403622	3.6894	up	noncoding	ENST00000455838	GAS5	GENCODE	632	chr1	-	173834092	173837127	ACTACACTGTGTGGAGCAAGTTTTAAAGAAGCAAAGGTATAGCAGTTCCAAGTATTTTTT	bidirectional	NM_032522	ZBTB37	zinc finger and BTB domain-containing protein 37 isoform b	+	173837492	173842778	7.25499	5.3716
ASHGA5P055150	0.0020196	0.0311786	3.6792	up	noncoding	ENST00000438498	ATF4P4	pseudogene	1049	chr11	+	113661039	113662088	ATAAGAAGTTGAAAAAAATGGAGTAAAACAAGACAGCAGCCACTGGGTACCGCCAGAAGA								7.14626	5.26687
ASHGA5P033548	0.00612511	0.0408325	3.67554	up	noncoding	ENST00000579713	RP11-403A21.2	GENCODE	817	chr18	-	21574176	21595303	GCTCTCACACAAAGGTTTTGGAAATACAGACTGATTTCCTTTGGTTACTAAAACTGATTT	intronic antisense	NM_001135993	TTC39C	tetratricopeptide repeat protein 39C isoform 1	+	21594383	21715574	5.67386	3.7959
ASHGA5P033548	0.00612511	0.0408325	3.67554	up	noncoding	ENST00000579713	RP11-403A21.2	GENCODE	817	chr18	-	21574176	21595303	GCTCTCACACAAAGGTTTTGGAAATACAGACTGATTTCCTTTGGTTACTAAAACTGATTT	intronic antisense	NM_001243425	TTC39C	tetratricopeptide repeat protein 39C isoform 3	+	21594383	21600262	5.67386	3.7959
ASHGA5P033548	0.00612511	0.0408325	3.67554	up	noncoding	ENST00000579713	RP11-403A21.2	GENCODE	817	chr18	-	21574176	21595303	GCTCTCACACAAAGGTTTTGGAAATACAGACTGATTTCCTTTGGTTACTAAAACTGATTT	intronic antisense	NM_153211	TTC39C	tetratricopeptide repeat protein 39C isoform 2	+	21572736	21715574	5.67386	3.7959
ASHGA5P042234	0.00250637	0.0336293	3.65274	up	noncoding	ENST00000432823	RP1-80N2.2	GENCODE	898	chr6	+	6692976	6714208	TTCTTCACCTATTAAACTTGTCTTTGATTAGCTCTCCATTGGTCAGAGATTCTGTGAGAT	intergenic							5.31958	3.4506
ASHGA5P020722	0.0223272	0.0712185	3.65233	up	noncoding	ENST00000518964	RP11-622O11.2	GENCODE	585	chr8	-	126934614	126963493	CTTTCCACAGGTATCCCACTTCTAAGATGCCTGATCTGAAGGACAGTAAAACAACTGACC	intergenic							6.10411	4.23529
ASHGA5P040877	0.0138244	0.0543372	3.64802	up	noncoding	ENST00000518172	MIR4454	GENCODE	574	chr5	-	170194207	170215654	TGTTGAGAAGCTGCTCACACCAAGGGGCTGAAGTAGGAATCACCTGGGAAACAGGGGGCA	natural antisense	NM_014211	GABRP	gamma-aminobutyric acid receptor subunit pi precursor	+	170210722	170241050	7.8639	5.99678
ASHGA5P044513	0.00972312	0.0464078	3.6367	up	noncoding	ENST00000530778	RP11-383J24.5	GENCODE	1767	chr8	-	125485050	125486817	GATCTTCAGAAATATAAATTAGCTACTCAACATATCTGTTATTCTGCCCTGATTGCACTG	bidirectional	NM_007218	RNF139	E3 ubiquitin-protein ligase RNF139	+	125487007	125500859	5.16339	3.30076
ASHGA5P013966	0.00164371	0.0292275	3.63389	up	noncoding	NR_034172	KANSL1-AS1	RefSeq	538	chr17	+	44270938	44274089	TGCGGCCGAGGAATGGCCATGAGATGTGAGTAGAAGCCCCCTGGACAGCCTCCAAAAGAG	intronic antisense	NM_001193465	KANSL1	KAT8 regulatory NSL complex subunit 1 isoform 2	-	44107281	44302740	9.27726	7.41575
ASHGA5P032466	0.0058232	0.0403622	3.62659	up	noncoding	ENST00000579913	LRRC37A4P	GENCODE	3243	chr17	-	43584106	43592522	TTTACAGTCATATCATCTAGCCCAGCAAGTCATGGAAGCATAGTTGTTAAAATCATCTGA	intronic antisense	ENST00000253803	AC091132.2	Uncharacterized protein [Source:UniProtKB/TrEMBL;Acc:H7BXE8]	+	43580625	43611631	5.43299	3.57437
ASHGA5P051021	0.0426288	0.106439	3.6257	up	noncoding	ENST00000428008	ZNFX1-AS1	GENCODE	566	chr20	+	47895178	47905797	CTAGTTGCAGTCAGGCTTCATACGCTATTGTCCTGCCCGTAAGTTCCCGTTTTGTGTGTG	bidirectional	NM_021035	ZNFX1	NFX1-type zinc finger-containing protein 1	-	47862438	47894756	7.91357	6.0553
ASHGA5P018786	0.00444291	0.0386604	3.62284	up	noncoding	ENST00000457645	BX248398.1	GENCODE	554	chr1	-	144300516	144301385	TTTAGTCCTTTGAAGAGAGCAGAATGGGGAAATGGAGAGAGAACCTGAAAGAGCCCCAAA	intergenic							6.79601	4.93889
ASHGA5P023189	0.000827993	0.0240747	3.61614	up	noncoding	ENST00000572973	KANSL1-AS1	GENCODE	424	chr17	+	44270997	44273903	AGTAAAGAGGGAATGGCCATGAGATGTGAGTAGAAGCCCCCTGGACAGCCTCCAAAAGAG	intronic antisense	NM_001193465	KANSL1	KAT8 regulatory NSL complex subunit 1 isoform 2	-	44107281	44302740	9.39868	7.54422
ASHGA5P033456	0.0385806	0.0999005	3.6121	up	noncoding	uc010wyg.2	FJ009034	UCSC_knowngene	462	chr17_ctg5_hap1	-	1320859	1323954	ACGTGCGGCGACGGCACGCAGCACTGCGGCAGGGGGAAGCCAGCCCTCGCTGCGGCCGAG	intergenic							4.86935	3.01651
ASHGA5P032510	0.00279174	0.0344152	3.61007	up	noncoding	ENST00000504438	RP11-463M16.4	pseudogene	285	chr17	-	46952275	46952560	TTTAAGATTAAGAGGCATACACCACTCAGTAAACTAATGAAAGCCTATTGTGAACAACAG								5.28415	3.43212
ASHGA5P019035	0.0256454	0.076781	3.60631	up	noncoding	ENST00000471091	RP11-2A4.3	GENCODE	433	chr3	+	137493385	137496438	TGTGCCTTAGATTTAGAATTCCACCCTCAGTTGGAATACAGATGATCCCTAACAAGTCAC	intergenic							9.05045	7.19993
ASHGA5P033327	0.00586463	0.0404119	3.58816	up	noncoding	uc001hwk.4	BC016972	UCSC_knowngene	888	chr1	-	235093089	235099746	CCTGGGGGAATGAATCTTTCAGAGCCAAACTAATGCTATGCATGCAGCTTATGATTTTTT	intergenic							5.00057	3.15733
ASHGA5P015739	0.0306119	0.0859538	3.58768	up	noncoding	ENST00000423083	NCF1B	GENCODE	1516	chr7	+	72634673	72649979	AGCTGTTGAGGAAAGACGACGTCACAGGCTACTTCCCGTCCATGTACCTGCAAAAGTCAG	intergenic							5.22485	3.3818
ASHGA5P017642	0.00382258	0.0374177	3.58538	up	noncoding	ENST00000444062	RP11-322M19.1	GENCODE	311	chr10	-	88998500	89066627	CAGGAAATTGGCAACGTGTTGGACCTTCCGGAGCTTCTCAGAAGACAGAGGGTTTTCTTT	intergenic							6.10529	4.26316
ASHGA5P035987	0.00707739	0.0423118	3.58287	up	noncoding	uc002std.1	BC046476	UCSC_knowngene	1324	chr2	+	88927346	88931337	CTGCTGCTAAGCAAAATGAGGATTCTGCTAGTGAGGATGAAAGGAAGAATGTGTAATCAG	bidirectional	NM_004836	EIF2AK3	eukaryotic translation initiation factor 2-alpha kinase 3 precursor	-	88856258	88927094	5.36602	3.5249
ASHGA5P032608	0.00534303	0.0400885	3.57824	up	noncoding	ENST00000565833	AMZ2P1	pseudogene	850	chr17	-	62964339	62969635	ATCTGTTTGCACAAGTTGCAGTGTGCTGTTATTGGCTTCAGCATTGTAGAAAGATATAAA								6.51106	4.6718
ASHGA5P033742	0.00342808	0.0361534	3.57794	up	noncoding	ENST00000582435	RP11-692N5.1	GENCODE	379	chr18	+	9615261	9619361	CCTGCTGGAATCACTACTGTAAACTGAGTATAAAGGAAAATAAACCCTCTTTTTCTTATC	bidirectional	NM_001042388	PPP4R1	serine/threonine-protein phosphatase 4 regulatory subunit 1 isoform a	-	9546788	9614605	6.1852	4.34607
ASHGA5P033742	0.00342808	0.0361534	3.57794	up	noncoding	ENST00000582435	RP11-692N5.1	GENCODE	379	chr18	+	9615261	9619361	CCTGCTGGAATCACTACTGTAAACTGAGTATAAAGGAAAATAAACCCTCTTTTTCTTATC	bidirectional	NM_005134	PPP4R1	serine/threonine-protein phosphatase 4 regulatory subunit 1 isoform b	-	9546788	9614605	6.1852	4.34607
ASHGA5P043447	0.00643689	0.0410595	3.57038	up	noncoding	ENST00000430825	AC005534.9	GENCODE	514	chr7	-	156461645	156469257	CAGTTCGCATAGACTTTTCATGCAGTTGAGTCTAATTTATATTTTACTATCCACTTACCC	natural antisense	NM_001184996	RNF32	RING finger protein 32	+	156433440	156469820	5.44195	3.60587
ASHGA5P043447	0.00643689	0.0410595	3.57038	up	noncoding	ENST00000430825	AC005534.9	GENCODE	514	chr7	-	156461645	156469257	CAGTTCGCATAGACTTTTCATGCAGTTGAGTCTAATTTATATTTTACTATCCACTTACCC	natural antisense	NM_001184997	RNF32	RING finger protein 32	+	156435670	156469820	5.44195	3.60587
ASHGA5P043447	0.00643689	0.0410595	3.57038	up	noncoding	ENST00000430825	AC005534.9	GENCODE	514	chr7	-	156461645	156469257	CAGTTCGCATAGACTTTTCATGCAGTTGAGTCTAATTTATATTTTACTATCCACTTACCC	natural antisense	NM_030936	RNF32	RING finger protein 32	+	156433352	156469820	5.44195	3.60587
ASHGA5P050500	0.0105055	0.0478849	3.56028	up	noncoding	ENST00000457602	AC097495.2	GENCODE	574	chr2	+	69062135	69064856	CTACTCTATTGGTATCAGGTTGCATTCTGTATCATCATTAAAATTTTCAGAAAAACTCTC	intergenic							6.22368	4.39169
ASHGA5P030242	0.0236951	0.0734924	3.54598	up	noncoding	uc002bmo.1	AX746605	UCSC_knowngene	3416	chr15	-	89045148	89048564	TGGGGGTTACAAAGTTTGAAATCTGTCTTAAGGAGGGATGTATTACTCAAAATAAATTGC	intergenic							5.73981	3.91363
ASHGA5P014854	0.0071725	0.0425084	3.54046	up	noncoding	ENST00000448718	GAS5	GENCODE	565	chr1	-	173833038	173836181	TAACGTTTTTATCCATGGATGACTTGCTTGGGTATGGAGAGTCGGCTTGACTACACTGTG	intergenic							7.96237	6.13844
ASHGA5P021644	0.00723799	0.0425919	3.5366	up	noncoding	ENST00000537068	SNHG1	GENCODE	629	chr11	-	62619459	62623353	TTACAGGTGAGCACTGTATAGATGACCACTTTCGTAAACTACTGACCTAGCTTGTTGCCA	bidirectional	NM_001012662	SLC3A2	4F2 cell-surface antigen heavy chain isoform b	+	62623483	62656355	7.66004	5.83767
ASHGA5P021644	0.00723799	0.0425919	3.5366	up	noncoding	ENST00000537068	SNHG1	GENCODE	629	chr11	-	62619459	62623353	TTACAGGTGAGCACTGTATAGATGACCACTTTCGTAAACTACTGACCTAGCTTGTTGCCA	bidirectional	NM_001012664	SLC3A2	4F2 cell-surface antigen heavy chain isoform e	+	62623483	62656355	7.66004	5.83767
ASHGA5P021644	0.00723799	0.0425919	3.5366	up	noncoding	ENST00000537068	SNHG1	GENCODE	629	chr11	-	62619459	62623353	TTACAGGTGAGCACTGTATAGATGACCACTTTCGTAAACTACTGACCTAGCTTGTTGCCA	bidirectional	NM_002394	SLC3A2	4F2 cell-surface antigen heavy chain isoform c	+	62623483	62656355	7.66004	5.83767
ASHGA5P046081	0.00340999	0.0361534	3.52265	up	noncoding	uc011mfp.1	AK127309	UCSC_knowngene	3067	chrUn_gl000219	-	51811	54878	CCACATAAAAGGAAGGGACCAAAAATATCTTAAAGAAATACTTCACGATGGAAGTGATGT	intergenic							5.71458	3.89792
ASHGA5P041485	0.00837809	0.0441234	3.52076	up	noncoding	uc003lup.1	AX747080	UCSC_knowngene	1530	chr5	+	151168141	151169671	GTGGCATGTAGGGGATACAGAGATGATTGCATACAAAGATGAAAAAGAAAACGTTTCTGC	intron sense-overlapping	NM_005754	G3BP1	ras GTPase-activating protein-binding protein 1	+	151151475	151184915	5.58345	3.76756
ASHGA5P041485	0.00837809	0.0441234	3.52076	up	noncoding	uc003lup.1	AX747080	UCSC_knowngene	1530	chr5	+	151168141	151169671	GTGGCATGTAGGGGATACAGAGATGATTGCATACAAAGATGAAAAAGAAAACGTTTCTGC	intron sense-overlapping	NM_198395	G3BP1	ras GTPase-activating protein-binding protein 1	+	151151475	151184915	5.58345	3.76756
ASHGA5P027181	0.00570596	0.0402776	3.52067	up	noncoding	ENST00000535163	RP11-428G5.5	GENCODE	852	chr12	-	32030012	32040137	AACAAAATTAGTTACCAGTAGACTTAGGCAAATGCTACACTGCACACAGGCGCATAACCC	intergenic							5.76319	3.94734
ASHGA5P040811	0.00537837	0.0400885	3.5101	up	noncoding	ENST00000518134	RP11-54C4.1	GENCODE	520	chr5	-	151145419	151145939	ACATTGGGGTGAGGCCATCACTTCATCCAGTGACTAGCACCACCTCTGGCAATGTCAGCC	intron sense-overlapping	ENST00000524142	ATOX1	ATX1 antioxidant protein 1 homolog (yeast) [Source:HGNC Symbol;Acc:798]	-	151122382	151152093	6.08114	4.26962
ASHGA5P054777	0.00458742	0.0388495	3.50378	up	noncoding	ENST00000425496	RP4-669L17.10	GENCODE	2661	chr1	+	324755	328453	TATAAATCCCAAAATATTGAATTTTGGAATATTTCCACCATTATGTAAATATTTTGATAG	intergenic							7.41316	5.60425
ASHGA5P026950	0.00694579	0.0420215	3.48539	up	noncoding	ENST00000540226	RP11-598F7.3	GENCODE	586	chr12	-	215689	221016	CTGGAAGTATTATCTTTAGTTAGGGGTATTTCCTTAACTAATAAAGCCTAGCATTGCTGT	intronic antisense	NM_001170738	IQSEC3	IQ motif and SEC7 domain-containing protein 3 isoform 1	+	176048	287625	5.5905	3.78918
ASHGA5P026950	0.00694579	0.0420215	3.48539	up	noncoding	ENST00000540226	RP11-598F7.3	GENCODE	586	chr12	-	215689	221016	CTGGAAGTATTATCTTTAGTTAGGGGTATTTCCTTAACTAATAAAGCCTAGCATTGCTGT	intronic antisense	NM_015232	IQSEC3	IQ motif and SEC7 domain-containing protein 3 isoform 2	+	186541	280494	5.5905	3.78918
ASHGA5P019679	0.00904287	0.0451458	3.46901	up	noncoding	NR_038354	WDR20	RefSeq	2239	chr14	+	102606188	102676867	TTTAACTGAGGCTGCTGACTTGAGTAAACCAATAGATAAAAGGATATACAAAGGAACACA	exon sense-overlapping	NM_001242414	WDR20	WD repeat-containing protein 20 isoform 4	+	102606188	102676867	5.09757	3.30304
ASHGA5P019679	0.00904287	0.0451458	3.46901	up	noncoding	NR_038354	WDR20	RefSeq	2239	chr14	+	102606188	102676867	TTTAACTGAGGCTGCTGACTTGAGTAAACCAATAGATAAAAGGATATACAAAGGAACACA	exon sense-overlapping	NM_001242415	WDR20	WD repeat-containing protein 20 isoform 5	+	102606188	102681341	5.09757	3.30304
ASHGA5P019679	0.00904287	0.0451458	3.46901	up	noncoding	NR_038354	WDR20	RefSeq	2239	chr14	+	102606188	102676867	TTTAACTGAGGCTGCTGACTTGAGTAAACCAATAGATAAAAGGATATACAAAGGAACACA	exon sense-overlapping	NM_001242416	WDR20	WD repeat-containing protein 20 isoform 6	+	102606188	102690010	5.09757	3.30304
ASHGA5P019679	0.00904287	0.0451458	3.46901	up	noncoding	NR_038354	WDR20	RefSeq	2239	chr14	+	102606188	102676867	TTTAACTGAGGCTGCTGACTTGAGTAAACCAATAGATAAAAGGATATACAAAGGAACACA	exon sense-overlapping	NM_001242417	WDR20	WD repeat-containing protein 20 isoform 7	+	102606188	102676867	5.09757	3.30304
ASHGA5P019679	0.00904287	0.0451458	3.46901	up	noncoding	NR_038354	WDR20	RefSeq	2239	chr14	+	102606188	102676867	TTTAACTGAGGCTGCTGACTTGAGTAAACCAATAGATAAAAGGATATACAAAGGAACACA	exon sense-overlapping	NM_001242418	WDR20	WD repeat-containing protein 20 isoform 8	+	102606188	102676867	5.09757	3.30304
ASHGA5P019679	0.00904287	0.0451458	3.46901	up	noncoding	NR_038354	WDR20	RefSeq	2239	chr14	+	102606188	102676867	TTTAACTGAGGCTGCTGACTTGAGTAAACCAATAGATAAAAGGATATACAAAGGAACACA	exon sense-overlapping	NM_144574	WDR20	WD repeat-containing protein 20 isoform 2	+	102606188	102676867	5.09757	3.30304
ASHGA5P019679	0.00904287	0.0451458	3.46901	up	noncoding	NR_038354	WDR20	RefSeq	2239	chr14	+	102606188	102676867	TTTAACTGAGGCTGCTGACTTGAGTAAACCAATAGATAAAAGGATATACAAAGGAACACA	exon sense-overlapping	NM_181291	WDR20	WD repeat-containing protein 20 isoform 1	+	102606188	102690010	5.09757	3.30304
ASHGA5P019679	0.00904287	0.0451458	3.46901	up	noncoding	NR_038354	WDR20	RefSeq	2239	chr14	+	102606188	102676867	TTTAACTGAGGCTGCTGACTTGAGTAAACCAATAGATAAAAGGATATACAAAGGAACACA	exon sense-overlapping	NM_181308	WDR20	WD repeat-containing protein 20 isoform 3	+	102606188	102676867	5.09757	3.30304
ASHGA5P030254	0.00401882	0.0377672	3.45247	up	noncoding	uc002bow.3	AK055981	UCSC_knowngene	2023	chr15	-	90617746	90619769	AATTTCTCCCAGATCTTAACGTCAGGGCTGTCTGGCCCTTTCATGAGTATGTGGGTTATA	intronic antisense	NM_198526	ZNF710	zinc finger protein 710	+	90544751	90625432	4.98655	3.19892
ASHGA5P021331	0.00453975	0.0386604	3.45144	up	noncoding	NR_024597	C11orf73	RefSeq	1054	chr11	+	86013252	86056985	TTCTGAAATGATATTTCTTTTCACTTTGAGTATCCTAGAGATGGGAGGATGCCTAGGAAG	exon sense-overlapping	NM_016401	C11orf73	protein Hikeshi	+	86013252	86056985	4.7122	2.925
ASHGA5P013205	0.0255562	0.0766774	3.43631	up	noncoding	NR_024091	ZFP91-CNTF	RefSeq	3544	chr11	+	58346586	58393205	AAGGGATGTCAAAGTCATACTGCAGTGGGACGGAACGGAGCATTCACCGCTGACCCCTCA	exon sense-overlapping	NM_000614	CNTF	ciliary neurotrophic factor	+	58390145	58393205	5.69405	3.91319
ASHGA5P013205	0.0255562	0.0766774	3.43631	up	noncoding	NR_024091	ZFP91-CNTF	RefSeq	3544	chr11	+	58346586	58393205	AAGGGATGTCAAAGTCATACTGCAGTGGGACGGAACGGAGCATTCACCGCTGACCCCTCA	exon sense-overlapping	NM_001197051	ZFP91	E3 ubiquitin-protein ligase ZFP91 isoform 2	+	58346586	58389023	5.69405	3.91319
ASHGA5P013205	0.0255562	0.0766774	3.43631	up	noncoding	NR_024091	ZFP91-CNTF	RefSeq	3544	chr11	+	58346586	58393205	AAGGGATGTCAAAGTCATACTGCAGTGGGACGGAACGGAGCATTCACCGCTGACCCCTCA	exon sense-overlapping	NM_053023	ZFP91	E3 ubiquitin-protein ligase ZFP91 isoform 1	+	58346586	58389023	5.69405	3.91319
ASHGA5P023401	0.00523776	0.0398493	3.42043	up	noncoding	ENST00000580995	ANKRD20A5P	GENCODE	401	chr18	+	14211309	14219970	TAATCATGCACTAACAAGCCTTACCAGTGGCTTCAGAGGAAGAACAGCAAAGGCGTGAAA	intergenic							5.29401	3.51984
ASHGA5P015708	0.00340314	0.0361534	3.41744	up	noncoding	ENST00000422825	ZNF815P	GENCODE	805	chr7	+	5886952	5893996	CTAGGCAGAGAAAGCTGACTTCATGAGACCGAGGATCTCGTTCGTTGATCGATGCTACAT	intergenic							5.10572	3.3328
ASHGA5P015526	0.00581812	0.0403622	3.41094	up	noncoding	ENST00000421064	GUSBP11	GENCODE	3041	chr22	-	23995355	24059534	ACTAACCAGTAGTGGGTGCAGTGGACCCCATCATGGAGAAGTTCAACACATCCAGCCTAC	natural antisense	NM_153615	RGL4	ral-GDS-related protein precursor	+	24033047	24041363	6.0364	4.26623
ASHGA5P022647	0.0124665	0.0516413	3.41081	up	noncoding	ENST00000560359	CTD-3110H11.2	GENCODE	709	chr15	+	50647524	50648567	CGCTGTGAAGGGGCGTCTGGGCATGGCTTTCCCAACCTAGTAACTGCAACTTTTAGCATC	natural antisense	NM_002041	GABPB1	GA-binding protein subunit beta-1 isoform gamma 1	-	50578076	50647605	5.6945	3.92439
ASHGA5P022647	0.0124665	0.0516413	3.41081	up	noncoding	ENST00000560359	CTD-3110H11.2	GENCODE	709	chr15	+	50647524	50648567	CGCTGTGAAGGGGCGTCTGGGCATGGCTTTCCCAACCTAGTAACTGCAACTTTTAGCATC	natural antisense	NM_005254	GABPB1	GA-binding protein subunit beta-1 isoform beta 1	-	50569388	50647605	5.6945	3.92439
ASHGA5P022647	0.0124665	0.0516413	3.41081	up	noncoding	ENST00000560359	CTD-3110H11.2	GENCODE	709	chr15	+	50647524	50648567	CGCTGTGAAGGGGCGTCTGGGCATGGCTTTCCCAACCTAGTAACTGCAACTTTTAGCATC	natural antisense	NM_016654	GABPB1	GA-binding protein subunit beta-1 isoform beta 2	-	50569388	50647605	5.6945	3.92439
ASHGA5P022647	0.0124665	0.0516413	3.41081	up	noncoding	ENST00000560359	CTD-3110H11.2	GENCODE	709	chr15	+	50647524	50648567	CGCTGTGAAGGGGCGTCTGGGCATGGCTTTCCCAACCTAGTAACTGCAACTTTTAGCATC	natural antisense	NM_016655	GABPB1	GA-binding protein subunit beta-1 isoform gamma 2	-	50578076	50647605	5.6945	3.92439
ASHGA5P022647	0.0124665	0.0516413	3.41081	up	noncoding	ENST00000560359	CTD-3110H11.2	GENCODE	709	chr15	+	50647524	50648567	CGCTGTGAAGGGGCGTCTGGGCATGGCTTTCCCAACCTAGTAACTGCAACTTTTAGCATC	natural antisense	NM_181427	GABPB1	GA-binding protein subunit beta-1 isoform gamma 2	-	50578076	50647605	5.6945	3.92439
ASHGA5P044240	0.00848115	0.0442585	3.40974	up	noncoding	ENST00000522190	RP11-503E24.2	GENCODE	708	chr8	-	42392671	42393447	GAATTCTAGAACAGTGATTCACCAGGACATAGGACAATGATTGCTTGTTACTAATTTAGT	intron sense-overlapping	NM_001257181	SLC20A2	sodium-dependent phosphate transporter 2	-	42273979	42396655	4.92921	3.15954
ASHGA5P044240	0.00848115	0.0442585	3.40974	up	noncoding	ENST00000522190	RP11-503E24.2	GENCODE	708	chr8	-	42392671	42393447	GAATTCTAGAACAGTGATTCACCAGGACATAGGACAATGATTGCTTGTTACTAATTTAGT	intron sense-overlapping	NM_006749	SLC20A2	sodium-dependent phosphate transporter 2	-	42273979	42397356	4.92921	3.15954
ASHGA5P037008	0.00765489	0.0433307	3.40522	up	noncoding	ENST00000412972	RP11-243J16.7	GENCODE	374	chr20	+	30274018	30304628	CTACCAACTGTTAACTTCTTTTCATTTATCCAAGTTTTGCCAGGTACCACACCAATAAAA	intronic antisense	NM_001191	BCL2L1	bcl-2-like protein 1 isoform 2	-	30252260	30310656	5.11391	3.34616
ASHGA5P037008	0.00765489	0.0433307	3.40522	up	noncoding	ENST00000412972	RP11-243J16.7	GENCODE	374	chr20	+	30274018	30304628	CTACCAACTGTTAACTTCTTTTCATTTATCCAAGTTTTGCCAGGTACCACACCAATAAAA	intronic antisense	NM_138578	BCL2L1	bcl-2-like protein 1 isoform 1	-	30252260	30310656	5.11391	3.34616
ASHGA5P037416	0.00885288	0.0449023	3.40459	up	noncoding	NR_001458	MIR155HG	RefSeq	1500	chr21	+	26934456	26947480	CAACTCTTCTCAACATTTTGTCCAGGTTATTCACTGTAACCAAATAAATCTCATGAGTCT	intergenic							6.75038	4.98291
ASHGA5P020649	0.0417528	0.104848	3.40013	up	noncoding	ENST00000517959	CTD-2336O2.1	GENCODE	917	chr8	-	1710246	1712668	GGGCACACAGAATCGACATCTAGAGGAGTACTCACCACTTAATTGATGATCAATACACGT	intronic antisense	NM_018941	CLN8	protein CLN8	+	1711869	1734736	5.44167	3.67608
ASHGA5P018219	0.00600939	0.0405793	3.39896	up	noncoding	ENST00000450783	RP11-295G20.2	GENCODE	430	chr1	-	231658206	231664042	AGTGGATGGTGAACAAAGGAACAGTAAATGGAGTAACTTGGCTAGAATATGGCAGTAACT	bidirectional	NM_005999	TSNAX	translin-associated protein X	+	231664398	231702269	5.39533	3.63024
ASHGA5P037904	0.00348005	0.0361898	3.3907	up	noncoding	ENST00000585003	CTA-292E10.6	GENCODE	516	chr22	+	29196696	29197212	AATAGTGAGGGCTTAATAAACGATAGGTGTTATCTCTGGGTTGGAGGGGAATACCTTCAA	bidirectional	NM_001079539	XBP1	X-box-binding protein 1 isoform XBP1(S)	-	29190547	29196560	7.30277	5.54119
ASHGA5P037904	0.00348005	0.0361898	3.3907	up	noncoding	ENST00000585003	CTA-292E10.6	GENCODE	516	chr22	+	29196696	29197212	AATAGTGAGGGCTTAATAAACGATAGGTGTTATCTCTGGGTTGGAGGGGAATACCTTCAA	bidirectional	NM_005080	XBP1	X-box-binding protein 1 isoform XBP1(U)	-	29190547	29196560	7.30277	5.54119
ASHGA5P056294	0.00583876	0.0403622	3.38319	up	noncoding	TCONS_00001898	XLOC_001286	LincRNAs identified by Cabili et al	1334	chr1	-	244210525	244212010	ACAAAGACGTGGAAATGTCTGCCGTCAAGAAATTGGAAATCGTATCGAGAACCCAGACTG	intergenic							5.32959	3.5712
ASHGA5P031757	0.00838135	0.0441234	3.38125	up	noncoding	ENST00000563424	RP11-401P9.4	GENCODE	3441	chr16	+	50679719	50683160	TTTAAAGATGGTGGCAGTGAAACTGGTACATGGGACCTGACTGGGCTTTGTTTGCAACTT	intergenic							5.14799	3.39043
ASHGA5P032609	0.0128561	0.0525235	3.3789	up	noncoding	ENST00000430983	AMZ2P1	GENCODE	3425	chr17	-	62962667	62971686	TCAAAAAGTCTCGTGGTGGAACATCTGACCCTTTTCAAGAGGAAGGATGAAAACTCTACA	intergenic							7.49715	5.7406
ASHGA5P050888	0.0061492	0.0408325	3.37855	up	noncoding	ENST00000444990	AC093642.5	GENCODE	557	chr2	+	243030829	243058523	CACAAAAGAAGTAAGTATTCTATTATAAATAAGAGAGTATCTTGGATTGTTTCTGTTGAA	intergenic							4.94032	3.18391
ASHGA5P039923	0.00499004	0.0392352	3.36657	up	noncoding	TCONS_00023171	XLOC_011119	LincRNAs identified by Cabili et al	945	chr14	-	99750983	99753677	GCCGATGTCATCTAGAACTCTGGGGGATTGGGGGAAAACGAACAGAACCAGATTAAAAAA	intergenic							7.80832	6.05703
ASHGA5P035515	0.00716277	0.0425084	3.35308	up	noncoding	TCONS_00005168	XLOC_002128	LincRNAs identified by Cabili et al	1334	chr2	-	64747475	64751427	ATGGGAGTATCAATTGCTTTGTGGTTATGCTGGATTTTGTGTTATTGCTCAGTCACTAAA	intergenic							5.40539	3.6599
ASHGA5P048793	0.00530204	0.0400885	3.35089	up	noncoding	ENST00000562009	CTD-2311M21.2	GENCODE	3337	chr15	+	74646796	74656961	TACTATCAGCCATGGTCAACCCCACCGTGTTCTTTGACATCGCAGTCACGGCGAGCCCTT	intronic antisense	NM_000781	CYP11A1	cholesterol side-chain cleavage enzyme, mitochondrial isoform a precursor	-	74630102	74660081	8.69231	6.94777
ASHGA5P048793	0.00530204	0.0400885	3.35089	up	noncoding	ENST00000562009	CTD-2311M21.2	GENCODE	3337	chr15	+	74646796	74656961	TACTATCAGCCATGGTCAACCCCACCGTGTTCTTTGACATCGCAGTCACGGCGAGCCCTT	intronic antisense	NM_001099773	CYP11A1	cholesterol side-chain cleavage enzyme, mitochondrial isoform b	-	74630102	74658553	8.69231	6.94777
ASHGA5P039618	0.00303804	0.0355889	3.34522	up	noncoding	ENST00000514727	PPP1R14BP3	pseudogene	442	chr4	-	140036086	140036528	ATTTCTGGTCTGCTGGACAAGATCCGGGGCATGCAGAAGCTGAGCACACCCCAGAAGAAG								5.74886	4.00676
ASHGA5P058631	0.0142742	0.0551645	3.34445	up	noncoding	uc011hzv.2	HLA-DQB	UCSC_knowngene	645	chr6_mcf_hap5	-	3961838	3964231	GTGGAGTGGCGGCTCCTGCACTGACTCCTGAGACTATTTTAACTGGGATTGGTTATCACT	intergenic							6.69283	4.95106
ASHGA5P055287	0.0109257	0.0487164	3.32934	up	noncoding	ENST00000536539	RP11-90D4.2	GENCODE	456	chr12	-	8536712	8543016	GACTGCGAGGACGGGCAGGACGCGCCGCGGTCGGCCAGGAAGGAGACCGGCACCCAGACA	intergenic							6.46649	4.73125
ASHGA5P053063	0.00153624	0.0285017	3.32823	up	noncoding	ENST00000326391	POLR2J4	GENCODE	1422	chr7	-	44053160	44058769	ACAGTGTGACCTAAAGGACCCGCAAGTGCTATTTGCTGGCTACAAAGTCCCCCACCCCTT	intergenic							8.50517	6.77042
ASHGA5P036589	0.00344144	0.0361534	3.32174	up	noncoding	ENST00000416204	AC131097.3	GENCODE	590	chr2	+	242913150	242914050	CTCCTGGGAAGTTGGGAGGGGGCATTTCAACCTGTTAATTTCTCAAATTATGTAGTCATT	intergenic							5.1634	3.43146
ASHGA5P030765	0.00546282	0.0401056	3.31069	up	noncoding	NR_037601	LOC100507217	RefSeq	1787	chr15	+	93426072	93441977	GAACTCATCTTCATGATCGAATTTAAAAGAACAATGGAACCCTGACTACGTTTCAACAAA	exon sense-overlapping	ENST00000556722	CHD2	chromodomain helicase DNA binding protein 2 [Source:HGNC Symbol;Acc:1917]	+	93426525	93480855	8.20886	6.48173
ASHGA5P018953	0.025323	0.0764653	3.30956	up	noncoding	ENST00000480246	AC002055.4	GENCODE	2987	chr22	+	51222289	51239737	CATTTAGGAGATGGCACCAAAAGCGAAGGAAGCTCCTGCTCATCCTAAAGCCGAAGCCAA	bidirectional	NM_001003789	RABL2B	rab-like protein 2B isoform 1	-	51205919	51222087	5.05629	3.32965
ASHGA5P018953	0.025323	0.0764653	3.30956	up	noncoding	ENST00000480246	AC002055.4	GENCODE	2987	chr22	+	51222289	51239737	CATTTAGGAGATGGCACCAAAAGCGAAGGAAGCTCCTGCTCATCCTAAAGCCGAAGCCAA	bidirectional	NM_001130919	RABL2B	rab-like protein 2B isoform 1	-	51205919	51222087	5.05629	3.32965
ASHGA5P018953	0.025323	0.0764653	3.30956	up	noncoding	ENST00000480246	AC002055.4	GENCODE	2987	chr22	+	51222289	51239737	CATTTAGGAGATGGCACCAAAAGCGAAGGAAGCTCCTGCTCATCCTAAAGCCGAAGCCAA	bidirectional	NM_001130920	RABL2B	rab-like protein 2B isoform 1	-	51205919	51222087	5.05629	3.32965
ASHGA5P018953	0.025323	0.0764653	3.30956	up	noncoding	ENST00000480246	AC002055.4	GENCODE	2987	chr22	+	51222289	51239737	CATTTAGGAGATGGCACCAAAAGCGAAGGAAGCTCCTGCTCATCCTAAAGCCGAAGCCAA	bidirectional	NM_001130921	RABL2B	rab-like protein 2B isoform 1	-	51205919	51222087	5.05629	3.32965
ASHGA5P018953	0.025323	0.0764653	3.30956	up	noncoding	ENST00000480246	AC002055.4	GENCODE	2987	chr22	+	51222289	51239737	CATTTAGGAGATGGCACCAAAAGCGAAGGAAGCTCCTGCTCATCCTAAAGCCGAAGCCAA	bidirectional	NM_001130922	RABL2B	rab-like protein 2B isoform 2	-	51205919	51222087	5.05629	3.32965
ASHGA5P018953	0.025323	0.0764653	3.30956	up	noncoding	ENST00000480246	AC002055.4	GENCODE	2987	chr22	+	51222289	51239737	CATTTAGGAGATGGCACCAAAAGCGAAGGAAGCTCCTGCTCATCCTAAAGCCGAAGCCAA	bidirectional	NM_001130923	RABL2B	rab-like protein 2B isoform 3	-	51205919	51222087	5.05629	3.32965
ASHGA5P018953	0.025323	0.0764653	3.30956	up	noncoding	ENST00000480246	AC002055.4	GENCODE	2987	chr22	+	51222289	51239737	CATTTAGGAGATGGCACCAAAAGCGAAGGAAGCTCCTGCTCATCCTAAAGCCGAAGCCAA	bidirectional	NM_007081	RABL2B	rab-like protein 2B isoform 2	-	51205919	51222087	5.05629	3.32965
ASHGA5P044811	0.0114786	0.049483	3.29531	up	noncoding	ENST00000520357	RP11-110G21.1	GENCODE	575	chr8	+	52812274	52825698	GGCGAGCCGGGAAAATATTGCTACTAAGGATCCTAAGCAGTGAACATGCTGTTAATACTT	bidirectional	NM_052937	PCMTD1	protein-L-isoaspartate O-methyltransferase domain-containing protein 1	-	52730139	52811735	5.90466	4.18425
ASHGA5P036593	0.00856693	0.0443672	3.2874	up	noncoding	ENST00000416103	AC093642.5	pseudogene	380	chr2	+	243037044	243061208	TTAAATAGCGAAGATGGAGAAATACTCAATAATGAAGAGCATGAATATGCATCCAAAAAA								4.93621	3.21926
ASHGA5P051173	0.0052201	0.0398465	3.28687	up	noncoding	uc002zlf.2	P704P	UCSC_knowngene	4260	chr22	-	16251235	16255495	CAAATGCTTCTAGGTGGACGCTGACTTAGTTGCATTACACCCTTTCTTGACAAAACCAAA	intergenic							7.42772	5.711
ASHGA5P038698	0.00573028	0.0402776	3.28518	up	noncoding	ENST00000443565	RP5-887A10.1	GENCODE	473	chr1	+	81106968	81112473	ATTTTTGGCTTTCGGCTCTGGAAAATATGAGAAATATGGGCAATTACTCTCTGAAGAAAG	intergenic							5.01483	3.29886
ASHGA5P026306	0.0142611	0.0551453	3.28067	up	noncoding	ENST00000510619	RP1-68D18.2	GENCODE	704	chr11	+	35234096	35235554	GGTGCCTTCATAATGGATAACTGTAGCCATTTTATGTAAGCATTGTCCTGTGATTAAAAA	intron sense-overlapping	NM_000610	CD44	CD44 antigen isoform 1 precursor	+	35160416	35253949	6.40668	4.69269
ASHGA5P026306	0.0142611	0.0551453	3.28067	up	noncoding	ENST00000510619	RP1-68D18.2	GENCODE	704	chr11	+	35234096	35235554	GGTGCCTTCATAATGGATAACTGTAGCCATTTTATGTAAGCATTGTCCTGTGATTAAAAA	intron sense-overlapping	NM_001001389	CD44	CD44 antigen isoform 2 precursor	+	35160416	35253949	6.40668	4.69269
ASHGA5P026306	0.0142611	0.0551453	3.28067	up	noncoding	ENST00000510619	RP1-68D18.2	GENCODE	704	chr11	+	35234096	35235554	GGTGCCTTCATAATGGATAACTGTAGCCATTTTATGTAAGCATTGTCCTGTGATTAAAAA	intron sense-overlapping	NM_001001390	CD44	CD44 antigen isoform 3 precursor	+	35160416	35253949	6.40668	4.69269
ASHGA5P026306	0.0142611	0.0551453	3.28067	up	noncoding	ENST00000510619	RP1-68D18.2	GENCODE	704	chr11	+	35234096	35235554	GGTGCCTTCATAATGGATAACTGTAGCCATTTTATGTAAGCATTGTCCTGTGATTAAAAA	intron sense-overlapping	NM_001001391	CD44	CD44 antigen isoform 4 precursor	+	35160416	35253949	6.40668	4.69269
ASHGA5P026306	0.0142611	0.0551453	3.28067	up	noncoding	ENST00000510619	RP1-68D18.2	GENCODE	704	chr11	+	35234096	35235554	GGTGCCTTCATAATGGATAACTGTAGCCATTTTATGTAAGCATTGTCCTGTGATTAAAAA	intron sense-overlapping	NM_001001392	CD44	CD44 antigen isoform 5 precursor	+	35160416	35253949	6.40668	4.69269
ASHGA5P026306	0.0142611	0.0551453	3.28067	up	noncoding	ENST00000510619	RP1-68D18.2	GENCODE	704	chr11	+	35234096	35235554	GGTGCCTTCATAATGGATAACTGTAGCCATTTTATGTAAGCATTGTCCTGTGATTAAAAA	intron sense-overlapping	NM_001202555	CD44	CD44 antigen isoform 6 precursor	+	35160416	35253949	6.40668	4.69269
ASHGA5P026306	0.0142611	0.0551453	3.28067	up	noncoding	ENST00000510619	RP1-68D18.2	GENCODE	704	chr11	+	35234096	35235554	GGTGCCTTCATAATGGATAACTGTAGCCATTTTATGTAAGCATTGTCCTGTGATTAAAAA	intron sense-overlapping	NM_001202556	CD44	CD44 antigen isoform 7 precursor	+	35160416	35253949	6.40668	4.69269
ASHGA5P026306	0.0142611	0.0551453	3.28067	up	noncoding	ENST00000510619	RP1-68D18.2	GENCODE	704	chr11	+	35234096	35235554	GGTGCCTTCATAATGGATAACTGTAGCCATTTTATGTAAGCATTGTCCTGTGATTAAAAA	intron sense-overlapping	NM_001202557	CD44	CD44 antigen isoform 8 precursor	+	35160416	35244867	6.40668	4.69269
ASHGA5P041784	0.00240786	0.0328446	3.26813	up	noncoding	ENST00000429032	PPP1R2P1	pseudogene	618	chr6	-	32846992	32847610	GAAGAATCAAATCAAGGATCTACTGCAAGTGACCAACAGCAAAATAAATCACGAAGTTCA								5.40018	3.69172
ASHGA5P033978	0.0483286	0.115033	3.26211	up	noncoding	NR_027064	PLAC2	RefSeq	3693	chr19	-	5558177	5568005	CAGCTTGGAACTAGATACAGAAATGCTGTTTTGAGAGTGTACTGAATAAAAGATTACATG	intergenic							5.43261	3.7268
ASHGA5P031623	0.0174897	0.0616892	3.26125	up	noncoding	uc021tfl.1	AF063596	UCSC_knowngene	1005	chr16	+	24551499	24552504	CTAACTTATTTTCCATCAGGAGGGCAGGAGAGCCTGTGCAAAGCTTGTTTGTTCAATCAG	exon sense-overlapping	NM_006910	RBBP6	E3 ubiquitin-protein ligase RBBP6 isoform 1	+	24550907	24584183	7.58306	5.87764
ASHGA5P031623	0.0174897	0.0616892	3.26125	up	noncoding	uc021tfl.1	AF063596	UCSC_knowngene	1005	chr16	+	24551499	24552504	CTAACTTATTTTCCATCAGGAGGGCAGGAGAGCCTGTGCAAAGCTTGTTTGTTCAATCAG	exon sense-overlapping	NM_018703	RBBP6	E3 ubiquitin-protein ligase RBBP6 isoform 2	+	24550907	24584183	7.58306	5.87764
ASHGA5P031623	0.0174897	0.0616892	3.26125	up	noncoding	uc021tfl.1	AF063596	UCSC_knowngene	1005	chr16	+	24551499	24552504	CTAACTTATTTTCCATCAGGAGGGCAGGAGAGCCTGTGCAAAGCTTGTTTGTTCAATCAG	exon sense-overlapping	NM_032626	RBBP6	E3 ubiquitin-protein ligase RBBP6 isoform 3	+	24550907	24560722	7.58306	5.87764
ASHGA5P039321	0.00199869	0.0310297	3.2487	up	noncoding	ENST00000513179	RP11-539L10.3	GENCODE	406	chr4	-	6672454	6675550	GCTAGTTTAAGGAAATATCTGACGCTGATAACCATGTCCCAAGCACTGCTCTAAGTTCCC	intergenic							5.21427	3.51441
ASHGA5P057869	0.000594505	0.0207649	3.24691	up	noncoding	TCONS_00022868	XLOC_011119	LincRNAs identified by Cabili et al	572	chr14	-	99751027	99753686	AGGAGAGAAGTCAGGACTCCTGGTCTGAAGAATATTTGACCTCATAACTATTGGGGGACA	intergenic							8.67922	6.98015
ASHGA5P019667	0.0185783	0.0640863	3.24403	up	noncoding	ENST00000499326	CTD-3110H11.2	GENCODE	717	chr15	+	50647749	50648633	CACCTCAGAGGGGCGTCTGGGCATGGCTTTCCCAACCTAGTAACTGCAACTTTTAGCATC	bidirectional	NM_002041	GABPB1	GA-binding protein subunit beta-1 isoform gamma 1	-	50578076	50647605	5.58513	3.88735
ASHGA5P019667	0.0185783	0.0640863	3.24403	up	noncoding	ENST00000499326	CTD-3110H11.2	GENCODE	717	chr15	+	50647749	50648633	CACCTCAGAGGGGCGTCTGGGCATGGCTTTCCCAACCTAGTAACTGCAACTTTTAGCATC	bidirectional	NM_005254	GABPB1	GA-binding protein subunit beta-1 isoform beta 1	-	50569388	50647605	5.58513	3.88735
ASHGA5P019667	0.0185783	0.0640863	3.24403	up	noncoding	ENST00000499326	CTD-3110H11.2	GENCODE	717	chr15	+	50647749	50648633	CACCTCAGAGGGGCGTCTGGGCATGGCTTTCCCAACCTAGTAACTGCAACTTTTAGCATC	bidirectional	NM_016654	GABPB1	GA-binding protein subunit beta-1 isoform beta 2	-	50569388	50647605	5.58513	3.88735
ASHGA5P019667	0.0185783	0.0640863	3.24403	up	noncoding	ENST00000499326	CTD-3110H11.2	GENCODE	717	chr15	+	50647749	50648633	CACCTCAGAGGGGCGTCTGGGCATGGCTTTCCCAACCTAGTAACTGCAACTTTTAGCATC	bidirectional	NM_016655	GABPB1	GA-binding protein subunit beta-1 isoform gamma 2	-	50578076	50647605	5.58513	3.88735
ASHGA5P019667	0.0185783	0.0640863	3.24403	up	noncoding	ENST00000499326	CTD-3110H11.2	GENCODE	717	chr15	+	50647749	50648633	CACCTCAGAGGGGCGTCTGGGCATGGCTTTCCCAACCTAGTAACTGCAACTTTTAGCATC	bidirectional	NM_181427	GABPB1	GA-binding protein subunit beta-1 isoform gamma 2	-	50578076	50647605	5.58513	3.88735
ASHGA5P037987	0.0121738	0.0509553	3.24293	up	noncoding	ENST00000416406	RP3-508I15.14	GENCODE	500	chr22	+	39135007	39145046	CTGGGCAGGTCTTAGAGTGATGGGACAATTTTGACTGAATTTTACTGATGTTATTAAAAA	natural antisense	NM_001199579	SUN2	SUN domain-containing protein 2 isoform a	-	39130718	39152024	5.66073	3.96344
ASHGA5P037987	0.0121738	0.0509553	3.24293	up	noncoding	ENST00000416406	RP3-508I15.14	GENCODE	500	chr22	+	39135007	39145046	CTGGGCAGGTCTTAGAGTGATGGGACAATTTTGACTGAATTTTACTGATGTTATTAAAAA	natural antisense	NM_001199580	SUN2	SUN domain-containing protein 2 isoform b	-	39130718	39151467	5.66073	3.96344
ASHGA5P037987	0.0121738	0.0509553	3.24293	up	noncoding	ENST00000416406	RP3-508I15.14	GENCODE	500	chr22	+	39135007	39145046	CTGGGCAGGTCTTAGAGTGATGGGACAATTTTGACTGAATTTTACTGATGTTATTAAAAA	natural antisense	NM_015374	SUN2	SUN domain-containing protein 2 isoform b	-	39130718	39152024	5.66073	3.96344
ASHGA5P025917	0.00464265	0.0388827	3.24215	up	noncoding	NR_046314	BLOC1S2	RefSeq	2787	chr10	-	102033034	102046469	TTAGAAGTAGCCACCAGTGAAGACTATAAGCTCCTGGAAAATATGAATAAACTCACCAGC	exon sense-overlapping	NM_173809	BLOC1S2	biogenesis of lysosome-related organelles complex 1 subunit 2	-	102033034	102046469	4.78451	3.08755
ASHGA5P042977	0.0235173	0.0731623	3.23626	up	noncoding	ENST00000580902	AC005154.6	GENCODE	926	chr7	-	30563590	30603614	AGAACCAAATGACAGCAATAGCCAAGTGTAATCATCAGTAACCCTGTGTTCTATCCACAG	intergenic							6.69143	4.99711
ASHGA5P047394	0.00444905	0.0386604	3.23254	up	noncoding	AI202367		LincRNAs identified by Khalil et al	445	chr2	+	18795945	18796390	TACTAAGCACAATAAAATAGGTAGATTCTTTACTGGGAACCAACCAGCAACAACAGGAAA	intergenic							4.9063	3.21364
ASHGA5P046400	0.00143933	0.0281188	3.23192	up	noncoding	ENST00000567614	WI2-89031B12.1	GENCODE	792	chrX	-	153746163	153746955	AGGAAGGGAGAGTTGTCTCGGAATGCTCAGGGGGACTCATTAAAGCAACACTTTCATAAA	intergenic							7.72106	6.02867
ASHGA5P044415	0.0083412	0.0440999	3.22823	up	noncoding	TCONS_00018869	XLOC_008691	LincRNAs identified by Cabili et al	1001	chr10	-	3107633	3108996	CATCAAGTCGTCTGTAATACAGAAAACGATAAATACAACCTAACAGTTCAAACATGACGA	intergenic							4.87357	3.18282
ASHGA5P019693	0.00772576	0.0433457	3.22126	up	noncoding	uc003idi.4	AF085995	UCSC_knowngene	456	chr4	+	120433527	120473183	CCAAATGCCTTACTTGACAGGATCACAGAATGTGAATTTTGAACAGATCTGAAAAGTTAT	intronic antisense	NM_001083	PDE5A	cGMP-specific 3',5'-cyclic phosphodiesterase isoform 1	-	120415549	120549981	5.3212	3.63358
ASHGA5P019693	0.00772576	0.0433457	3.22126	up	noncoding	uc003idi.4	AF085995	UCSC_knowngene	456	chr4	+	120433527	120473183	CCAAATGCCTTACTTGACAGGATCACAGAATGTGAATTTTGAACAGATCTGAAAAGTTAT	intronic antisense	NM_033430	PDE5A	cGMP-specific 3',5'-cyclic phosphodiesterase isoform 2	-	120415549	120548442	5.3212	3.63358
ASHGA5P019693	0.00772576	0.0433457	3.22126	up	noncoding	uc003idi.4	AF085995	UCSC_knowngene	456	chr4	+	120433527	120473183	CCAAATGCCTTACTTGACAGGATCACAGAATGTGAATTTTGAACAGATCTGAAAAGTTAT	intronic antisense	NM_033437	PDE5A	cGMP-specific 3',5'-cyclic phosphodiesterase isoform 3	-	120415549	120549239	5.3212	3.63358
ASHGA5P036270	0.00967852	0.0463839	3.21933	up	noncoding	ENST00000428541	AC079305.10	GENCODE	499	chr2	+	178129086	178130243	ATTGCCCACCCAGAGCTGGGAGAAAAACGGGAACCCCAAGAGAACCTCTTCCCACCAAAG	natural antisense	NM_006164	NFE2L2	nuclear factor erythroid 2-related factor 2 isoform 1	-	178095030	178129859	8.49766	6.81089
ASHGA5P055136	0.0283442	0.0819574	3.20119	up	noncoding	TCONS_00005969	XLOC_002602	LincRNAs identified by Cabili et al	997	chr3	+	27753780	27755870	TGGTGTCTGACACTCCATCTTAGGAATGCCTTATCATAAGGTGTTAATTGGGGCCACTCA	intergenic							6.01415	4.33554
ASHGA5P035268	0.00129821	0.0272064	3.1997	up	noncoding	TCONS_00004392	XLOC_002275	LincRNAs identified by Cabili et al	570	chr2	-	113402608	113403284	TTAATTTCTCCGTGGCTGACCTGTGTTTGTAACGCCGCAGCTGTTGCGAGGGGGAAGGAC	intergenic							8.91712	7.23918
ASHGA5P017840	0.00323891	0.0360585	3.19936	up	noncoding	ENST00000446309	AC005076.5	GENCODE	338	chr7	-	86780755	86781736	GCGAAAAAAGGAACCAAAGAGAAGTGAAGGAATGTGTCCAAGGGCTCCCAAGTTGGCGGT	natural antisense	NM_001142326	DMTF1	cyclin-D-binding Myb-like transcription factor 1 isoform b	+	86781676	86825648	5.05825	3.38047
ASHGA5P017840	0.00323891	0.0360585	3.19936	up	noncoding	ENST00000446309	AC005076.5	GENCODE	338	chr7	-	86780755	86781736	GCGAAAAAAGGAACCAAAGAGAAGTGAAGGAATGTGTCCAAGGGCTCCCAAGTTGGCGGT	natural antisense	NM_001142327	DMTF1	cyclin-D-binding Myb-like transcription factor 1 isoform a	+	86781676	86825648	5.05825	3.38047
ASHGA5P025740	0.000723101	0.0228346	3.19607	up	noncoding	NR_033187	PIN4	RefSeq	1257	chrX	+	71401525	71418194	GCGGGGAAAGGTCAGACACATTCTATGTGAAAAACATGGCAAAATCATGGAAGCCATGGA	exon sense-overlapping	NM_001170747	PIN4	peptidyl-prolyl cis-trans isomerase NIMA-interacting 4 isoform 2	+	71401525	71483814	7.01441	5.33811
ASHGA5P025740	0.000723101	0.0228346	3.19607	up	noncoding	NR_033187	PIN4	RefSeq	1257	chrX	+	71401525	71418194	GCGGGGAAAGGTCAGACACATTCTATGTGAAAAACATGGCAAAATCATGGAAGCCATGGA	exon sense-overlapping	NM_006223	PIN4	peptidyl-prolyl cis-trans isomerase NIMA-interacting 4 isoform 1	+	71401525	71418194	7.01441	5.33811
ASHGA5P050147	0.0402457	0.102686	3.19496	up	noncoding	ENST00000497576	CTC-260E6.2	pseudogene	441	chr19	+	20235852	20236293	CTCATCAAGGTGAACGGGCAGCCCCTGGAGATGACTGAGCCGCGCATGCTACAATACGAG								8.57418	6.89838
ASHGA5P031570	0.00167724	0.0293469	3.18921	up	noncoding	ENST00000565118	ABCC6P1	GENCODE	796	chr16	+	18582483	18584844	GGCCACATTAGGATGAACCTTTTAAAAAGTTATGCATTTATTTTTATGTTCCCCCACTGG	intergenic							6.34178	4.66858
ASHGA5P021173	0.0111793	0.0491399	3.18113	up	noncoding	ENST00000526897	RP11-802E16.3	GENCODE	791	chr11	+	67819559	67821161	CAGGAAGACGGACATTTCATATATATGGATTTCACAGCTACACTCGATCCACGCCCCACA	natural antisense	NM_001277	CHKA	choline kinase alpha isoform a	-	67820325	67888858	5.13267	3.46312
ASHGA5P021173	0.0111793	0.0491399	3.18113	up	noncoding	ENST00000526897	RP11-802E16.3	GENCODE	791	chr11	+	67819559	67821161	CAGGAAGACGGACATTTCATATATATGGATTTCACAGCTACACTCGATCCACGCCCCACA	natural antisense	NM_212469	CHKA	choline kinase alpha isoform b	-	67820325	67888858	5.13267	3.46312
ASHGA5P021387	0.00369417	0.0369302	3.17582	up	noncoding	NR_024598	C11orf73	RefSeq	949	chr11	+	86013252	86056985	GGGGAGGCTGGAGAAGGAAGCCAACATCCTTTTGGAGCCATGAATATTGTCCGAACTCCA	exon sense-overlapping	NM_016401	C11orf73	protein Hikeshi	+	86013252	86056985	6.21783	4.5507
ASHGA5P019332	0.0133519	0.0533213	3.16598	up	noncoding	NR_045147	ITGB3BP	RefSeq	1069	chr1	-	63906440	63988944	GCTCTCCTAGCATCACGTCATCTTGACAGCTATGAATTCCTTAAAGCCATTTTAAACTGA	exon sense-overlapping	NM_001206739	ITGB3BP	centromere protein R isoform 1	-	63906440	63988944	7.8359	6.17325
ASHGA5P019332	0.0133519	0.0533213	3.16598	up	noncoding	NR_045147	ITGB3BP	RefSeq	1069	chr1	-	63906440	63988944	GCTCTCCTAGCATCACGTCATCTTGACAGCTATGAATTCCTTAAAGCCATTTTAAACTGA	exon sense-overlapping	NM_014288	ITGB3BP	centromere protein R isoform 2	-	63906440	63988944	7.8359	6.17325
ASHGA5P025804	0.0118991	0.0504234	3.16069	up	noncoding	NR_038193	METTL23	RefSeq	809	chr17	+	74722911	74729962	CGTCCCGCAGATTTTGAAGACATTTTGGCTACAATATATTTTTTGATGCACAAGAATCCC	exon sense-overlapping	NM_001080510	METTL23	methyltransferase-like protein 23 isoform 1	+	74722911	74729962	5.04508	3.38484
ASHGA5P025804	0.0118991	0.0504234	3.16069	up	noncoding	NR_038193	METTL23	RefSeq	809	chr17	+	74722911	74729962	CGTCCCGCAGATTTTGAAGACATTTTGGCTACAATATATTTTTTGATGCACAAGAATCCC	exon sense-overlapping	NM_001206983	METTL23	methyltransferase-like protein 23 isoform 1	+	74722911	74729962	5.04508	3.38484
ASHGA5P025804	0.0118991	0.0504234	3.16069	up	noncoding	NR_038193	METTL23	RefSeq	809	chr17	+	74722911	74729962	CGTCCCGCAGATTTTGAAGACATTTTGGCTACAATATATTTTTTGATGCACAAGAATCCC	exon sense-overlapping	NM_001206984	METTL23	methyltransferase-like protein 23 isoform 1	+	74722911	74729962	5.04508	3.38484
ASHGA5P025804	0.0118991	0.0504234	3.16069	up	noncoding	NR_038193	METTL23	RefSeq	809	chr17	+	74722911	74729962	CGTCCCGCAGATTTTGAAGACATTTTGGCTACAATATATTTTTTGATGCACAAGAATCCC	exon sense-overlapping	NM_001206985	METTL23	methyltransferase-like protein 23 isoform 2	+	74722911	74729962	5.04508	3.38484
ASHGA5P025804	0.0118991	0.0504234	3.16069	up	noncoding	NR_038193	METTL23	RefSeq	809	chr17	+	74722911	74729962	CGTCCCGCAGATTTTGAAGACATTTTGGCTACAATATATTTTTTGATGCACAAGAATCCC	exon sense-overlapping	NM_001206986	METTL23	methyltransferase-like protein 23 isoform 2	+	74722911	74729962	5.04508	3.38484
ASHGA5P025804	0.0118991	0.0504234	3.16069	up	noncoding	NR_038193	METTL23	RefSeq	809	chr17	+	74722911	74729962	CGTCCCGCAGATTTTGAAGACATTTTGGCTACAATATATTTTTTGATGCACAAGAATCCC	exon sense-overlapping	NM_001206987	METTL23	methyltransferase-like protein 23 isoform 2	+	74722911	74729962	5.04508	3.38484
ASHGA5P044430	0.00932537	0.0457225	3.1488	up	noncoding	ENST00000521696	RP11-410L14.2	GENCODE	380	chr8	-	100008990	100025272	CGCTGGTTCGATGCAGAGGAAGAAACCACACCTAGCACGTAAAGCCCTGAAAAAATAGAG	bidirectional	NM_015243	VPS13B	vacuolar protein sorting-associated protein 13B isoform 3	+	100025493	100222015	6.25284	4.59803
ASHGA5P044430	0.00932537	0.0457225	3.1488	up	noncoding	ENST00000521696	RP11-410L14.2	GENCODE	380	chr8	-	100008990	100025272	CGCTGGTTCGATGCAGAGGAAGAAACCACACCTAGCACGTAAAGCCCTGAAAAAATAGAG	bidirectional	NM_017890	VPS13B	vacuolar protein sorting-associated protein 13B isoform 5	+	100025493	100889814	6.25284	4.59803
ASHGA5P044430	0.00932537	0.0457225	3.1488	up	noncoding	ENST00000521696	RP11-410L14.2	GENCODE	380	chr8	-	100008990	100025272	CGCTGGTTCGATGCAGAGGAAGAAACCACACCTAGCACGTAAAGCCCTGAAAAAATAGAG	bidirectional	NM_152564	VPS13B	vacuolar protein sorting-associated protein 13B isoform 1	+	100025493	100889814	6.25284	4.59803
ASHGA5P044430	0.00932537	0.0457225	3.1488	up	noncoding	ENST00000521696	RP11-410L14.2	GENCODE	380	chr8	-	100008990	100025272	CGCTGGTTCGATGCAGAGGAAGAAACCACACCTAGCACGTAAAGCCCTGAAAAAATAGAG	bidirectional	NM_181661	VPS13B	vacuolar protein sorting-associated protein 13B isoform 4	+	100025493	100133987	6.25284	4.59803
ASHGA5P020194	0.00463841	0.0388825	3.1422	up	noncoding	NR_028383	TIMM8B	RefSeq	1155	chr11	-	111955538	111957522	CTCACAAATAGTGCATCACTTCATGGAGTTATGTTGGGATAAATGTGTGGAGAAGCCAGG	exon sense-overlapping	NM_012459	TIMM8B	mitochondrial import inner membrane translocase subunit Tim8 B	-	111955538	111957522	6.32413	4.67235
ASHGA5P020194	0.00463841	0.0388825	3.1422	up	noncoding	NR_028383	TIMM8B	RefSeq	1155	chr11	-	111955538	111957522	CTCACAAATAGTGCATCACTTCATGGAGTTATGTTGGGATAAATGTGTGGAGAAGCCAGG	natural antisense	NM_001082969	C11orf57	uncharacterized protein C11orf57 isoform a	+	111944967	111955874	6.32413	4.67235
ASHGA5P020194	0.00463841	0.0388825	3.1422	up	noncoding	NR_028383	TIMM8B	RefSeq	1155	chr11	-	111955538	111957522	CTCACAAATAGTGCATCACTTCATGGAGTTATGTTGGGATAAATGTGTGGAGAAGCCAGG	natural antisense	NM_001082970	C11orf57	uncharacterized protein C11orf57 isoform b	+	111944967	111955874	6.32413	4.67235
ASHGA5P020194	0.00463841	0.0388825	3.1422	up	noncoding	NR_028383	TIMM8B	RefSeq	1155	chr11	-	111955538	111957522	CTCACAAATAGTGCATCACTTCATGGAGTTATGTTGGGATAAATGTGTGGAGAAGCCAGG	natural antisense	NM_018195	C11orf57	uncharacterized protein C11orf57 isoform a	+	111944967	111955874	6.32413	4.67235
ASHGA5P039563	0.0150015	0.0566922	3.14175	up	noncoding	ENST00000441170	AC092661.2	GENCODE	1663	chr4	-	118495666	118497329	TTTCAGACATGGTGAATGCATCGACTGGAAGCTCCTTTTTCTCCACCTCTCTCAATACAT	intergenic							7.19694	5.54537
ASHGA5P037411	0.00560253	0.0402344	3.13924	up	noncoding	ENST00000453784	AP000476.1	GENCODE	2909	chr21	+	25801053	25862621	CTGGGATAAAGATTGCTGCATCCTTATATTCTTGTGTATAAACAGACCCTGTATATGTAA	intergenic							4.86627	3.21585
ASHGA5P032716	0.00517794	0.0397219	3.1374	up	noncoding	ENST00000582866	RP11-498C9.15	GENCODE	2682	chr17	-	79836300	79838982	GCCTAAGGTAGGCCAGAGTTAATTTTTGTGTTATCTATACACGTTATTGAAGCGAATTAT	intergenic							5.22728	3.57771
ASHGA5P045028	0.00686181	0.0420015	3.13316	up	noncoding	ENST00000520913	PVT1	GENCODE	584	chr8	+	128902891	128944941	AGACATGGTACCTGATGGACACCAAGCTACGTACAGCTTCAAGGCCCCTTCTTTCTTTGC	intergenic							7.07052	5.4229
ASHGA5P056574	0.0333777	0.0906359	3.12716	up	noncoding	TCONS_00006196	XLOC_002793	LincRNAs identified by Cabili et al	355	chr3	+	125485333	125505694	ACCGGCACCCAGACAGGTGGCGACGGCAGAGGAGAAGGAAAATACATGTACAGCCAACTT	intergenic							8.87657	7.23171
ASHGA5P038939	0.0404506	0.102924	3.12186	up	noncoding	uc021xcj.1	AX747104	UCSC_knowngene	3171	chr3	+	111442569	111445740	GGCTTTTTACCCCTAGGAAATAATTGTCCAAGTATATATCTCGTCTTCTTTCTTGTAACT	intron sense-overlapping	NM_001185106	PLCXD2	PI-PLC X domain-containing protein 2 isoform a	+	111393522	111565294	6.26296	4.62056
ASHGA5P038939	0.0404506	0.102924	3.12186	up	noncoding	uc021xcj.1	AX747104	UCSC_knowngene	3171	chr3	+	111442569	111445740	GGCTTTTTACCCCTAGGAAATAATTGTCCAAGTATATATCTCGTCTTCTTTCTTGTAACT	intron sense-overlapping	NM_153268	PLCXD2	PI-PLC X domain-containing protein 2 isoform b	+	111393522	111565294	6.26296	4.62056
ASHGA5P054227	0.00790489	0.043491	3.11827	up	noncoding	ENST00000539453	BCORP1	GENCODE	942	chrY	-	21628825	21665034	TGGCAAGATACCTCTTGGCACTTGTTTTCTCCTTGGGCTTATATAGAGGCTATTTCCCCT	intergenic							9.56597	7.92522
ASHGA5P027668	0.00468144	0.0390348	3.10363	up	noncoding	TCONS_00017369	XLOC_008233	LincRNAs identified by Cabili et al	285	chrX	-	128809963	128812358	TTGTGTTTGTCTTGGGGACTGTTCCGTCAGAATGAGCAGCTTAAAAAATGTCGCCTGTGA	intergenic							5.42446	3.7905
ASHGA5P000054	0.00821652	0.0439278	3.10199	up	noncoding	AK091357		RNAdb	2311	chr8	-	17082475	17084786	GTGAGCAGGTGTCTTGTATCACTGCGAAACCCATGCATAATAAAAACTTGTTCTTGAGCT	intergenic							6.06153	4.42833
ASHGA5P032602	0.00329054	0.0361534	3.1019	up	noncoding	ENST00000582986	PLEKHM1P	GENCODE	5014	chr17	-	62778836	62833272	TTCCAGTCCAAACCCCAAGAGCTCATCACATAATAAAAGTGTCATAATAGCTGATATAGG	intergenic							5.39741	3.76426
ASHGA5P055907	0.00807263	0.0437937	3.08575	up	noncoding	ENST00000537850	AE000661.37	GENCODE	655	chr14	-	22887344	22901731	ATGGATGGCTGTAAGATTGATGTAATTAACATTTTATTTTCAGGGCCACAGTGCTGGTTG	intergenic							5.1258	3.50017
ASHGA5P038732	0.0102719	0.0473891	3.0849	up	noncoding	ENST00000561507	RP11-1024P17.1	GENCODE	1916	chr3	+	30739152	30741068	CTGACACAATGTAGGAGCAATCCATGGTACTCAAAGAATATTATGGAATTTAACAACAAG	intergenic							4.80668	3.18146
ASHGA5P043265	0.00535305	0.0400885	3.07583	up	noncoding	uc003vcq.1	AF520792	UCSC_knowngene	413	chr7	-	104754024	104754437	GTATTGCATTTTTATACCTAAGATGCATTCACAGAACTGCTGCTGACAGGAAAGAAAAAA	natural antisense	NM_018682	MLL5	histone-lysine N-methyltransferase MLL5	+	104654636	104754532	6.41254	4.79156
ASHGA5P043265	0.00535305	0.0400885	3.07583	up	noncoding	uc003vcq.1	AF520792	UCSC_knowngene	413	chr7	-	104754024	104754437	GTATTGCATTTTTATACCTAAGATGCATTCACAGAACTGCTGCTGACAGGAAAGAAAAAA	natural antisense	NM_182931	MLL5	histone-lysine N-methyltransferase MLL5	+	104654636	104754532	6.41254	4.79156
ASHGA5P036731	0.00838764	0.0441234	3.06928	up	noncoding	ENST00000565928	TSPY26P	GENCODE	3884	chr20	-	30774279	30778163	TTTGTCCAGTCACAAGGGGATCTGTGACACTTTTGTTTTCTATACGCATGATAAAAAATA	intergenic							5.54056	3.92266
ASHGA5P008103	0.00358221	0.0364387	3.06593	up	noncoding	NR_036471	ENY2	RefSeq	2946	chr8	+	110346551	110358189	CACTGTAAAGGTAATTAAAGAAAAAGGACTAGAACACGTTACTGTTGATGACTTGGTGGC	exon sense-overlapping	NM_001193557	ENY2	enhancer of yellow 2 transcription factor homolog isoform 2	+	110346551	110358189	6.71028	5.09396
ASHGA5P008103	0.00358221	0.0364387	3.06593	up	noncoding	NR_036471	ENY2	RefSeq	2946	chr8	+	110346551	110358189	CACTGTAAAGGTAATTAAAGAAAAAGGACTAGAACACGTTACTGTTGATGACTTGGTGGC	exon sense-overlapping	NM_020189	ENY2	enhancer of yellow 2 transcription factor homolog isoform 1	+	110346551	110358189	6.71028	5.09396
ASHGA5P020640	0.0461735	0.111887	3.06449	up	noncoding	NR_038447	LOC100130231	RefSeq	653	chr8	-	126934766	126963441	TAAACTGTCCTTGACACAACTTTAGAGCTTCAACTGAGAATCTAGAAGAGAGTAGATGGA	intergenic							5.34465	3.729
ASHGA5P025729	0.00673081	0.0418791	3.06342	up	noncoding	NR_028436	UBE2L3	RefSeq	3137	chr22	+	21921835	21978323	GACTTTAGCCACCCACAAGTACAGAAAATAATCCAGTCCCTCATAGCACTGGTGAATGAC	exon sense-overlapping	NM_001256355	UBE2L3	ubiquitin-conjugating enzyme E2 L3 isoform 4	+	21903735	21978323	6.93027	5.31512
ASHGA5P025729	0.00673081	0.0418791	3.06342	up	noncoding	NR_028436	UBE2L3	RefSeq	3137	chr22	+	21921835	21978323	GACTTTAGCCACCCACAAGTACAGAAAATAATCCAGTCCCTCATAGCACTGGTGAATGAC	exon sense-overlapping	NM_001256356	UBE2L3	ubiquitin-conjugating enzyme E2 L3 isoform 3	+	21921835	21978323	6.93027	5.31512
ASHGA5P025729	0.00673081	0.0418791	3.06342	up	noncoding	NR_028436	UBE2L3	RefSeq	3137	chr22	+	21921835	21978323	GACTTTAGCCACCCACAAGTACAGAAAATAATCCAGTCCCTCATAGCACTGGTGAATGAC	exon sense-overlapping	NM_003347	UBE2L3	ubiquitin-conjugating enzyme E2 L3 isoform 1	+	21921835	21978323	6.93027	5.31512
ASHGA5P038695	0.00452166	0.0386604	3.0612	up	noncoding	uc003bwe.1	AX748267	UCSC_knowngene	2429	chr3	+	11577722	11580151	ATGGTATGGTAGAGAGGAAAGAGACTCATATTTGAATATGACACAGAATAGGCCCTTAGT	intron sense-overlapping	NM_001136031	ATG7	ubiquitin-like modifier-activating enzyme ATG7 isoform b	+	11314009	11599139	5.556	3.94191
ASHGA5P038695	0.00452166	0.0386604	3.0612	up	noncoding	uc003bwe.1	AX748267	UCSC_knowngene	2429	chr3	+	11577722	11580151	ATGGTATGGTAGAGAGGAAAGAGACTCATATTTGAATATGACACAGAATAGGCCCTTAGT	intron sense-overlapping	NM_001144912	ATG7	ubiquitin-like modifier-activating enzyme ATG7 isoform c	+	11314009	11599139	5.556	3.94191
ASHGA5P038695	0.00452166	0.0386604	3.0612	up	noncoding	uc003bwe.1	AX748267	UCSC_knowngene	2429	chr3	+	11577722	11580151	ATGGTATGGTAGAGAGGAAAGAGACTCATATTTGAATATGACACAGAATAGGCCCTTAGT	intron sense-overlapping	NM_006395	ATG7	ubiquitin-like modifier-activating enzyme ATG7 isoform a	+	11314009	11599139	5.556	3.94191
ASHGA5P019378	0.0040191	0.0377672	3.05682	up	noncoding	NR_073059	C7orf55	RefSeq	989	chr7	+	139025195	139031065	GTGGGATAGGGTCACCAGTGAAAAGTTGTGCAGAGCCCAACATGAGCTTCATTTCCAAGC	exon sense-overlapping	NM_001244584	C7orf55-LUC7L2	C7orf55-LUC7L2 protein	+	139025877	139108203	5.27102	3.65899
ASHGA5P019378	0.0040191	0.0377672	3.05682	up	noncoding	NR_073059	C7orf55	RefSeq	989	chr7	+	139025195	139031065	GTGGGATAGGGTCACCAGTGAAAAGTTGTGCAGAGCCCAACATGAGCTTCATTTCCAAGC	exon sense-overlapping	NM_001244585	LUC7L2	putative RNA-binding protein Luc7-like 2 isoform 3	+	139025104	139108203	5.27102	3.65899
ASHGA5P019378	0.0040191	0.0377672	3.05682	up	noncoding	NR_073059	C7orf55	RefSeq	989	chr7	+	139025195	139031065	GTGGGATAGGGTCACCAGTGAAAAGTTGTGCAGAGCCCAACATGAGCTTCATTTCCAAGC	exon sense-overlapping	NM_197964	C7orf55	UPF0562 protein C7orf55	+	139025877	139031065	5.27102	3.65899
ASHGA5P046513	0.0112561	0.0491399	3.05533	up	noncoding	uc004dgs.4	LOC401588	UCSC_knowngene	1905	chrX	+	46404927	46407670	AGTGTGAATTTTCTAATGCTGAGTAAGTTGTGATCCAGAAGTAAATGTATCTGCAAGCTG	bidirectional	NM_001039891	ZNF674	zinc finger protein 674 isoform 1	-	46357159	46404892	6.5637	4.95237
ASHGA5P046513	0.0112561	0.0491399	3.05533	up	noncoding	uc004dgs.4	LOC401588	UCSC_knowngene	1905	chrX	+	46404927	46407670	AGTGTGAATTTTCTAATGCTGAGTAAGTTGTGATCCAGAAGTAAATGTATCTGCAAGCTG	bidirectional	NM_001146291	ZNF674	zinc finger protein 674 isoform 2	-	46357159	46404892	6.5637	4.95237
ASHGA5P046513	0.0112561	0.0491399	3.05533	up	noncoding	uc004dgs.4	LOC401588	UCSC_knowngene	1905	chrX	+	46404927	46407670	AGTGTGAATTTTCTAATGCTGAGTAAGTTGTGATCCAGAAGTAAATGTATCTGCAAGCTG	bidirectional	NM_001190417	ZNF674	zinc finger protein 674 isoform 3	-	46357159	46404892	6.5637	4.95237
ASHGA5P043700	0.012141	0.0508668	3.02756	up	noncoding	ENST00000412772	RP11-134P9.3	GENCODE	775	chr1	+	203256279	203257929	GTGGAAAGAGTGAACATATGTGCAGAATGCTTAATAAACGTGATCTCCTTTTATCTTCAA	intergenic							5.71171	4.11356
ASHGA5P047609	0.0448261	0.109902	3.02543	up	noncoding	BX098395		LincRNAs identified by Khalil et al	341	chr1	+	33430528	33430868	CACTTCCAGTAAATGATGGTTCAGTTACATTATTTATAAAAAGCAGGCAGGGGTTGATCA	intergenic							6.53922	4.94208
ASHGA5P040872	0.0111859	0.0491399	3.02431	up	noncoding	ENST00000511921	CTB-114C7.4	GENCODE	2182	chr5	-	169735704	169739720	TTCCTCATTTTACAGTAAGGGAAACACCCCTGGTACAAAGTAAATACTCAATGCTCATTA	intergenic							5.69526	4.09865
ASHGA5P043628	0.011354	0.049251	3.01902	up	noncoding	NR_040085	LOC100506776	RefSeq	3516	chr7	+	38381177	38418238	TGAATTACCTTTCATGTCCTCTAAACATACCAACAAGGAGGCTGGAGTTAGGACTTATGT	intergenic							5.49286	3.89878
ASHGA5P014634	0.00729306	0.042698	3.01676	up	noncoding	ENST00000450589	GAS5	GENCODE	632	chr1	-	173833038	173837125	CCTTTTAAAGGTATGGAGAGTCGGCTTGACTACACTGTGTGGAGCAAGTTTTAAAGAAGC	bidirectional	NM_001122770	ZBTB37	zinc finger and BTB domain-containing protein 37 isoform a	+	173837492	173855774	7.93152	6.33852
ASHGA5P014634	0.00729306	0.042698	3.01676	up	noncoding	ENST00000450589	GAS5	GENCODE	632	chr1	-	173833038	173837125	CCTTTTAAAGGTATGGAGAGTCGGCTTGACTACACTGTGTGGAGCAAGTTTTAAAGAAGC	bidirectional	NM_032522	ZBTB37	zinc finger and BTB domain-containing protein 37 isoform b	+	173837492	173842778	7.93152	6.33852
ASHGA5P028426	0.018641	0.0640863	3.00355	up	noncoding	ENST00000434601	LINC00422	GENCODE	1179	chr13	-	21877650	21922860	GCCTACAGCCTAAATTTTCAAAAACAAGTTAATGCCAGAATATAAACTCCGTGAAGTAAC	intergenic							5.37876	3.79209
ASHGA5P027589	0.0276832	0.0808095	3.00215	up	noncoding	uc001tsx.2	C12orf47	UCSC_knowngene	1810	chr12	-	112277573	112280706	GGTAATAAACAGGAAAAAGCCCGAGTCTGATGCTAAGAAGAACATAAACAGGATGCTGAG	natural antisense	NM_003668	MAPKAPK5	MAP kinase-activated protein kinase 5 isoform 1	+	112280278	112331228	5.85698	4.27098
ASHGA5P027589	0.0276832	0.0808095	3.00215	up	noncoding	uc001tsx.2	C12orf47	UCSC_knowngene	1810	chr12	-	112277573	112280706	GGTAATAAACAGGAAAAAGCCCGAGTCTGATGCTAAGAAGAACATAAACAGGATGCTGAG	natural antisense	NM_139078	MAPKAPK5	MAP kinase-activated protein kinase 5 isoform 2	+	112280278	112331228	5.85698	4.27098
ASHGA5P036723	0.00475599	0.0390427	2.99888	up	noncoding	ENST00000454331	RP4-610C12.3	GENCODE	553	chr20	-	29521636	29522987	TATTTATAACTCCCTCTATAACTCTCTGTTTGGAGACACTGTGGCTCTATTGACAGACTG	intergenic							5.72268	4.13826
ASHGA5P034766	0.00798859	0.0435617	2.99344	up	noncoding	ENST00000452378	RP4-635E18.7	GENCODE	2682	chr1	+	11128527	11133154	TGTGCTCTCATTCTTACTCATAATGCTGGTAAAAACAAGCCAGATAAGTAAGATAGAGTG	natural antisense	NM_001001998	EXOSC10	exosome component 10 isoform 1	-	11126675	11159938	4.89804	3.31623
ASHGA5P034766	0.00798859	0.0435617	2.99344	up	noncoding	ENST00000452378	RP4-635E18.7	GENCODE	2682	chr1	+	11128527	11133154	TGTGCTCTCATTCTTACTCATAATGCTGGTAAAAACAAGCCAGATAAGTAAGATAGAGTG	natural antisense	NM_002685	EXOSC10	exosome component 10 isoform 2	-	11126675	11159938	4.89804	3.31623
ASHGA5P026217	0.0252856	0.0764506	2.98972	up	noncoding	uc001mke.3	AK026905	UCSC_knowngene	3237	chr11	+	12237840	12241077	GATACACTAAACTTGCCAGCTCTCTTCAATCCTCACATCCTGTGTTTCATTGCTAGTGTC	exon sense-overlapping	NM_014632	MICAL2	protein-methionine sulfoxide oxidase MICAL2	+	12132137	12285331	6.3808	4.80079
ASHGA5P044157	0.0212962	0.0694944	2.98043	up	noncoding	NR_027715	FLJ14107	RefSeq	1839	chr8	-	22497883	22499722	GGGTTTGGTTTGGGCCAAGTAGTGCTTAGTTTTAATTTTCTCTTTCTGGAAATAAATACT	intron sense-overlapping	NM_018688	BIN3	bridging integrator 3	-	22477946	22526661	5.49873	3.9232
ASHGA5P057753	7.29225e-05	0.0112092	2.9755	up	noncoding	TCONS_00021766	XLOC_010361	LincRNAs identified by Cabili et al	365	chr13	+	42079326	42080461	TCTGCTCTTGGTCAAAACTGTAGAATGTTCAGCTCTGATGAGATAAACTGAGGCTGCTTG	intergenic							5.77551	4.20238
ASHGA5P030552	0.0063524	0.0410595	2.97304	up	noncoding	ENST00000560518	RP11-430B1.2	GENCODE	1972	chr15	+	52472413	52498071	CCCAAGTTTTTTCCTTCAGGATAAATCATCCTTATATAAAGAAAACTACCAACAGCGTAC	intronic antisense	NM_016194	GNB5	guanine nucleotide-binding protein subunit beta-5 isoform b	-	52413122	52483565	5.08398	3.51204
ASHGA5P030552	0.0063524	0.0410595	2.97304	up	noncoding	ENST00000560518	RP11-430B1.2	GENCODE	1972	chr15	+	52472413	52498071	CCCAAGTTTTTTCCTTCAGGATAAATCATCCTTATATAAAGAAAACTACCAACAGCGTAC	natural antisense	NM_018728	MYO5C	unconventional myosin-Vc	-	52484514	52587995	5.08398	3.51204
ASHGA5P040484	0.0215664	0.0698504	2.97084	up	noncoding	NR_027439	LOC100272216	RefSeq	2049	chr5	-	68926979	68929028	ATGGCACCAGTGACAGAGCGACCATAATGGATGAATAAGCGCAGCCAGGTACCCGCGCAA	intergenic							7.04699	5.47612
ASHGA5P037217	0.0120793	0.0507671	2.97072	up	noncoding	ENST00000436373	AP001171.1	GENCODE	864	chr21	-	21629064	21631133	GACATGGTATATGCAAGAATAAATGTGTGCGTGAATCAAACCAGAGGTTGTGTTTATTTT	intergenic							4.48971	2.9189
ASHGA5P007375	0.00355734	0.0364387	2.96357	up	noncoding	NR_024206	LINC00152	RefSeq	518	chr2	+	87754973	87821030	CCTCTCCTTGAATAACTGGGAGATGAAACAGGAAGCTCTATGACACACTTGATCGAATAT	intergenic							6.13188	4.56454
ASHGA5P043034	0.0314571	0.0874581	2.96098	up	noncoding	ENST00000427076	POLR2J4	GENCODE	6466	chr7	-	43980493	44058748	ATGGTGCTGAAAAGAACACCTTTACCTGTAATAAGCCTGCCTGAGTTAATAAAAATATCA	intronic antisense	NM_175064	SPDYE1	putative WBSCR19-like protein 6	+	44040488	44049723	6.19044	4.62436
ASHGA5P043034	0.0314571	0.0874581	2.96098	up	noncoding	ENST00000427076	POLR2J4	GENCODE	6466	chr7	-	43980493	44058748	ATGGTGCTGAAAAGAACACCTTTACCTGTAATAAGCCTGCCTGAGTTAATAAAAATATCA	natural antisense	NM_015983	UBE2D4	ubiquitin-conjugating enzyme E2 D4	+	43966034	43995735	6.19044	4.62436
ASHGA5P027164	0.0166869	0.0603279	2.95952	up	noncoding	ENST00000427824	RP3-467K16.4	GENCODE	5178	chr1	-	15729474	15735929	TTATGCGGCAGGCAACAGCTGTGCAGATCCTAATAATCTACTCTGGGTGACAGTTTAACA	bidirectional	NM_024329	EFHD2	EF-hand domain-containing protein D2	+	15736390	15756839	5.43314	3.86777
ASHGA5P016889	0.00534574	0.0400885	2.95853	up	noncoding	uc002uns.1	AK125001	UCSC_knowngene	1765	chr2	+	181988563	182264280	CAACTCAGAGTTTCATCCTAAACTGAGAGACCAACATCAAAAGAATCTTCTCAAGTTTCT	intergenic							5.20478	3.6399
ASHGA5P033228	0.0430776	0.106952	2.95653	up	noncoding	ENST00000416221	RP11-295G20.2	GENCODE	465	chr1	-	231658133	231664302	GGAATAGCTTGTTATGCAACAATACATAATTAATACACTGGTCTCCCACTTTCAAGTTTG	natural antisense	ENST00000366639	TSNAX	translin-associated factor X [Source:HGNC Symbol;Acc:12380]	+	231664286	231702270	4.78873	3.22483
ASHGA5P027608	0.0221094	0.0708129	2.95366	up	noncoding	ENST00000549373	RP11-115H15.2	GENCODE	493	chr12	-	116612306	116619100	AGGATGTGTACAGGTTAGATTTCGAGGGGACTGTTTTCTGTTTAAGAAGTAACTCATTTT	intron sense-overlapping	NM_015335	MED13L	mediator of RNA polymerase II transcription subunit 13-like	-	116396380	116714991	4.9596	3.3971
ASHGA5P036276	0.00803858	0.0436793	2.95291	up	noncoding	ENST00000415236	AC009948.5	GENCODE	662	chr2	+	179278749	179297009	ACATTGATATTGTCCATTGGCGCTCAGTTCATCTGTAATGACACATTCAAGGATGACGAT	natural antisense	NM_001139517	PRKRA	interferon-inducible double stranded RNA-dependent protein kinase activator A isoform 2	-	179296140	179315484	4.99938	3.43724
ASHGA5P036276	0.00803858	0.0436793	2.95291	up	noncoding	ENST00000415236	AC009948.5	GENCODE	662	chr2	+	179278749	179297009	ACATTGATATTGTCCATTGGCGCTCAGTTCATCTGTAATGACACATTCAAGGATGACGAT	natural antisense	NM_001139518	PRKRA	interferon-inducible double stranded RNA-dependent protein kinase activator A isoform 3	-	179296140	179315355	4.99938	3.43724
ASHGA5P036276	0.00803858	0.0436793	2.95291	up	noncoding	ENST00000415236	AC009948.5	GENCODE	662	chr2	+	179278749	179297009	ACATTGATATTGTCCATTGGCGCTCAGTTCATCTGTAATGACACATTCAAGGATGACGAT	natural antisense	NM_003690	PRKRA	interferon-inducible double stranded RNA-dependent protein kinase activator A isoform 1	-	179296140	179315958	4.99938	3.43724
ASHGA5P027250	0.00748282	0.0429099	2.945	up	noncoding	TCONS_00011743	XLOC_005208	LincRNAs identified by Cabili et al	4186	chr6	+	25992967	26002137	CTGCTGTTCAACTGATGATGTGTGAGCTGTCAGTAGTTCAAACTAGTCATTATCTTTATG	intergenic							5.63239	4.07413
ASHGA5P041888	0.0370835	0.0974484	2.93934	up	noncoding	ENST00000511849	RP1-240B8.3	GENCODE	675	chr6	-	62340137	62390954	GGTCAACTTTGATTCAAAGATAGTCTTCAGTTACCAAACCTTATCACATGACTGTAAAAC	exon sense-overlapping	NM_152688	KHDRBS2	KH domain-containing, RNA-binding, signal transduction-associated protein 2	-	62389864	62996100	5.21443	3.65894
ASHGA5P033837	0.0369558	0.0973579	2.93535	up	noncoding	TCONS_00003974	XLOC_001788	LincRNAs identified by Cabili et al	2784	chr2	+	192559981	192563100	CCTAAACACACAGAGGAGAATTACTTCAAGTATTTTTAAAACACAGTCACTTGTCTATGC	intergenic							6.29705	4.74352
ASHGA5P055818	0.00855522	0.0443672	2.93443	up	noncoding	NR_038991	RBM26-AS1	RefSeq	2484	chr13	+	79980443	79998468	AATTCGGAAATGATTTTGAAAATTGTGTTGGTTTTTAATGTAAGTTTATATGTCAGCTTT	bidirectional	NM_022118	RBM26	RNA-binding protein 26	-	79894099	79979923	5.0038	3.45072
ASHGA5P031047	0.00717891	0.0425084	2.93217	up	noncoding	ENST00000567108	CTD-3203P2.1	GENCODE	1684	chr16	-	27224630	27226314	AGACAACGTTTGTTATTATTACTGCTACTATTACTATTTGCTCCTCATGAGATCAAGGTG	natural antisense	NM_001145348	KDM8	lysine-specific demethylase 8 isoform 1	+	27215295	27233089	4.96495	3.41298
ASHGA5P031047	0.00717891	0.0425084	2.93217	up	noncoding	ENST00000567108	CTD-3203P2.1	GENCODE	1684	chr16	-	27224630	27226314	AGACAACGTTTGTTATTATTACTGCTACTATTACTATTTGCTCCTCATGAGATCAAGGTG	natural antisense	NM_024773	KDM8	lysine-specific demethylase 8 isoform 2	+	27214806	27233089	4.96495	3.41298
ASHGA5P045579	0.00538301	0.0400885	2.92902	up	noncoding	TCONS_00001799	XLOC_001188	LincRNAs identified by Cabili et al	367	chr1	-	210463786	210466574	CCCGCCGGCTGGCCAGGACAGACCTGGATGCCCTCCACCCTCCAGCCAAACTTATTTTTT	intergenic							11.963	10.4126
ASHGA5P044023	0.0215986	0.0698699	2.9283	up	noncoding	NR_038926	PRKAG2-AS1	RefSeq	808	chr7	+	151574126	151576308	CGTTCGTGCATAAATGTAATCCTCGGCCGCAGAATAAACCAGCTCGGAGCCTGCAGCTGG	natural antisense	NM_016203	PRKAG2	5'-AMP-activated protein kinase subunit gamma-2 isoform a	-	151253200	151574316	5.02359	3.47353
ASHGA5P014823	0.00401246	0.0377672	2.92816	up	noncoding	uc001kem.3	LOC728190	UCSC_knowngene	2340	chr10	-	89003888	89102315	AGGAGAAAAGCAAAACCATATTCCTGCTGCTGTCAGTTTTGATGCACTGAGAAAACTTCA	intergenic							5.64823	4.09823
ASHGA5P044389	0.0110876	0.0490287	2.91942	up	noncoding	uc003yet.3	BC067244	UCSC_knowngene	2167	chr8	-	92080142	92082417	GACAGTACAGATGACCTATAAACTGGTTAAATAGCCCTATTACAATTGAAATTGGGTCAA	bidirectional	NM_016023	OTUD6B	OTU domain-containing protein 6B	+	92082423	92099323	6.20479	4.65911
ASHGA5P053880	0.000598582	0.0208284	2.91817	up	noncoding	NR_024542	SNHG7	RefSeq	984	chr9	-	139619045	139622636	TGGAATAAAGGTACAGATAGAGGCCTCACCCCCTCTGGGACCACTGGCACTCAGGGTGTT	natural antisense	NM_152421	FAM69B	protein FAM69B	+	139607023	139619170	8.82934	7.28428
ASHGA5P053376	0.0273338	0.0801669	2.91725	up	noncoding	uc010pmp.1	BC136808	UCSC_knowngene	1659	chr1	-	173387087	173430501	TTTGGATAATTTCCGTCCTTGGCGGTGTGTTCTATAGCATAGGTATGAAGTGGGTGCTCT	intergenic							10.788	9.24335
ASHGA5P057422	0.00742413	0.0427823	2.90458	up	noncoding	TCONS_00017180	XLOC_007992	LincRNAs identified by Cabili et al	307	chrX	+	56098008	56231479	GAATGTTTAGAAGCTGGGCAGAGAAATCGAGCTGCAAAATGACCTACAGATATTACAGTT	intron sense-overlapping	ENST00000433279	AL353698.1	Uncharacterized protein [Source:UniProtKB/TrEMBL;Acc:E7EML2]	+	56100756	56102014	5.39611	3.85778
ASHGA5P030887	0.00794255	0.0435209	2.90231	up	noncoding	ENST00000562232	RP11-20I23.6	GENCODE	459	chr16	-	2619043	2621937	TAAGTGGCTACAGGGCAACAAGACTATCCCTGTGCCAAATACCAGATTCCAAAGAAACTC	intronic antisense	NM_001261816	PDPK1	3-phosphoinositide-dependent protein kinase 1 isoform 3	+	2587964	2653191	4.83885	3.30165
ASHGA5P030887	0.00794255	0.0435209	2.90231	up	noncoding	ENST00000562232	RP11-20I23.6	GENCODE	459	chr16	-	2619043	2621937	TAAGTGGCTACAGGGCAACAAGACTATCCCTGTGCCAAATACCAGATTCCAAAGAAACTC	intronic antisense	NM_002613	PDPK1	3-phosphoinositide-dependent protein kinase 1 isoform 1	+	2587964	2653191	4.83885	3.30165
ASHGA5P030887	0.00794255	0.0435209	2.90231	up	noncoding	ENST00000562232	RP11-20I23.6	GENCODE	459	chr16	-	2619043	2621937	TAAGTGGCTACAGGGCAACAAGACTATCCCTGTGCCAAATACCAGATTCCAAAGAAACTC	intronic antisense	NM_031268	PDPK1	3-phosphoinositide-dependent protein kinase 1 isoform 2	+	2587964	2653191	4.83885	3.30165
ASHGA5P019689	0.016315	0.0596277	2.89508	up	noncoding	ENST00000552990	RP11-493L12.2	GENCODE	654	chr12	-	47599683	47610227	ACATGAAATGACCCTTGGCTCTTATTGTTCTTGCTGGTGTGGTATGTTCACGGCTGAAAA	natural antisense	NM_138371	PCED1B	protein FAM113B	+	47610051	47630443	9.69256	8.15896
ASHGA5P040939	0.0102939	0.0473891	2.89403	up	noncoding	uc011cly.2	BC013821	UCSC_knowngene	2682	chr5	+	478317	480999	CCAGGGCAAATTGTATGTGCTCCTTACTGGGTTTATTATAAGTGTCACATGTTTTTTATA	natural antisense	NM_004174	SLC9A3	sodium/hydrogen exchanger 3	-	473333	524549	6.64262	5.10954
ASHGA5P037806	0.00314189	0.0358556	2.89054	up	noncoding	TCONS_00024870	XLOC_011763	LincRNAs identified by Cabili et al	227	chr16	+	67525953	67538083	CGGATTTATAGAACAGTATGCATAATATGACCCCAACTGCATTCCAAAAAATAGATGTAG	intergenic							6.66731	5.13597
ASHGA5P043114	0.00442729	0.0386604	2.88609	up	noncoding	TCONS_00014675	XLOC_006774	LincRNAs identified by Cabili et al	264	chr8	+	37439299	37440484	TTAAAGCACTGATGAAACGCAGAGAATTGTGGCTGGTTGTTAGAATATACTGCGGAGACG	intergenic							4.69229	3.16318
ASHGA5P044373	0.00881601	0.044869	2.87901	up	noncoding	ENST00000524052	RP11-317J10.2	GENCODE	430	chr8	-	86368851	86375283	TTTTTACCATTTCACACAAACTTTTAAAGATTATTCCACGCCGTTAGCTCTGTGCTTCTA	bidirectional	NM_000067	CA2	carbonic anhydrase 2	+	86376130	86393721	4.81767	3.2921
ASHGA5P036782	0.0137244	0.0541983	2.87595	up	noncoding	ENST00000570096	RP4-616B8.4	GENCODE	187	chr20	-	37590567	37590754	GCACTGGGCGTTGAAGCAGTGCTTTCTGGATTAAATACGAAATACTGATGTCACAAGCTA	bidirectional	NM_001190809	DHX35	probable ATP-dependent RNA helicase DHX35 isoform 2	+	37590980	37668366	4.79521	3.27117
ASHGA5P036782	0.0137244	0.0541983	2.87595	up	noncoding	ENST00000570096	RP4-616B8.4	GENCODE	187	chr20	-	37590567	37590754	GCACTGGGCGTTGAAGCAGTGCTTTCTGGATTAAATACGAAATACTGATGTCACAAGCTA	bidirectional	NM_021931	DHX35	probable ATP-dependent RNA helicase DHX35 isoform 1	+	37590980	37668366	4.79521	3.27117
ASHGA5P047782	0.0116748	0.0498651	2.87058	up	noncoding	TCONS_00013642	XLOC_006301	LincRNAs identified by Cabili et al	1783	chr7	+	154795156	154797398	CTTGCCTGAAGGAAAAACCAAGAATTTGTCATCCATCCTTAAATTTTTATGACACCCTTT	intergenic							6.51713	4.99578
ASHGA5P019165	0.00393332	0.0377018	2.86681	up	noncoding	ENST00000470997	HLA-DPB2	pseudogene	776	chr6	+	33080292	33096861	TGTGGAGTGGACATCTTCACGCACAGAAGGAGGAAGAAAGTTCAACAAGGATCTGCATAA								7.07996	5.56051
ASHGA5P039205	0.00785677	0.0434017	2.86675	up	noncoding	ENST00000561748	RP4-575N6.5	GENCODE	592	chr1	+	101708713	101709305	TAAATACCTTGAGGGAGGAATCACAAATAACTAAAAGAAACTTTTGTAGAGACTATCAGA	intergenic							5.36456	3.84514
ASHGA5P028558	0.00270326	0.03424	2.85878	up	noncoding	ENST00000416253	DLEU2	GENCODE	1116	chr13	-	50613527	50656114	TAAAATGTAAACATGACACTAATAAGCTCAATAAATGTTTGGCCTGTCTAGTATAATAAA	bidirectional	ENST00000378180	DLEU1	deleted in lymphocytic leukemia 1 (non-protein coding) [Source:HGNC Symbol;Acc:13747]	+	50656306	50679433	5.82946	4.31406
ASHGA5P046719	0.00731064	0.0427195	2.85603	up	noncoding	ENST00000569906	RP11-66N11.8	GENCODE	755	chrX	+	152864826	152869808	ACAAAATTCCAAGAGGGCCTTTTCGAATAGACGCATGAACGGTGTTTGTGTCTGGATCGT	bidirectional	NM_001130997	FAM58A	cyclin-related protein FAM58A isoform 2	-	152853382	152864632	5.88819	4.37418
ASHGA5P046719	0.00731064	0.0427195	2.85603	up	noncoding	ENST00000569906	RP11-66N11.8	GENCODE	755	chrX	+	152864826	152869808	ACAAAATTCCAAGAGGGCCTTTTCGAATAGACGCATGAACGGTGTTTGTGTCTGGATCGT	bidirectional	NM_152274	FAM58A	cyclin-related protein FAM58A isoform 1	-	152853382	152864632	5.88819	4.37418
ASHGA5P050886	0.0385009	0.0997834	2.85577	up	noncoding	ENST00000426962	AC093642.3	GENCODE	430	chr2	+	242913428	242914075	GGGAGGGGGCATTTCAACCTGTTAATTTCTCAAATTATGTAGTCATTCAAAAAGAAATAG	intergenic							5.51175	3.99788
ASHGA5P049021	0.00854866	0.0443672	2.85574	up	noncoding	ENST00000577055	CTD-2270P14.3	GENCODE	1778	chr16	-	2787076	2800811	TCTGAACTGCTTAAAACTCTTCCAGACACCCTCAGGTTGACATCACAACTCCTTTGTTGG	intergenic							6.05347	4.5396
ASHGA5P003753	0.0166099	0.0602753	2.84996	up	noncoding	ENST00000529061	PMS2P3	pseudogene	1254	chr7	-	75132253	75157139	AACAGGAAATGAACACATTGCAGGGGCCAGTGTCATTCAAAGATGTGGCTGTGGATTTCA								4.69284	3.1819
ASHGA5P014635	0.00446308	0.0386604	2.8497	up	noncoding	ENST00000414075	GAS5	GENCODE	413	chr1	-	173833038	173835344	CTGTGTGGAGCAAGTTTTAAAGAAGCAAAGGACTCAGAATTCATGATTGAAGAAATGCAG	intergenic							8.33048	6.81967
ASHGA5P029187	0.00647434	0.0411157	2.84958	up	noncoding	ENST00000564237	RP11-196G18.22	GENCODE	4527	chr1	-	149816064	149820591	CGCCGCAGTATGCTTAACATGTATTTTCTAAGTTTGTATTATGCCTTTATCTTGGTACTT	intergenic							6.82687	5.31611
ASHGA5P047551	0.00635975	0.0410595	2.8469	up	noncoding	ENST00000428940	RP11-77P6.2	GENCODE	643	chr10	+	88281701	88282443	GTAAAATACGCCTATGAAAACTGGGGGAGAGGAATAAAACAAGCTGGCAGAACGTTTTTC	bidirectional	NM_015045	WAPAL	wings apart-like protein homolog	-	88195012	88281541	5.24223	3.73284
ASHGA5P040421	0.00483795	0.0391245	2.84484	up	noncoding	uc003jnb.1	AK056817	UCSC_knowngene	2757	chr5	-	42985502	42993435	ATGGAACTGCCATTGCTCAGTAGGAAAATGTCCTTTCTACAAGCATTCATATTTCAATAA	intergenic							5.39157	3.88322
ASHGA5P016927	0.00215888	0.0314014	2.84109	up	noncoding	ENST00000440803	RP11-175I17.4	GENCODE	797	chr10	-	46349533	46387931	TGTCTAATTATCACAGTGTCAGAGATGGCTTTGGATTCCCCATTCTGTGTGCTGCTGTCT	intergenic							5.26318	3.75674
ASHGA5P000053	0.00337761	0.0361534	2.83836	up	noncoding	AK091312		RNAdb	2542	chr6	+	16764576	16767113	GTCTGTGATTTCATAGTACCCACCTCTGAAATAAGACTCTGTCTACAATTAAAAACAAAG	intergenic							5.89987	4.39481
ASHGA5P020304	0.00647996	0.041123	2.83671	up	noncoding	ENST00000511256	CTC-276P9.1	GENCODE	477	chr5	-	134374530	134375386	CGCTGCCCAGGAGAAGTGGGCAGGAGAGAGGGCCGCCCGCTGCTCCCCGCTGCGTCCAGG	intronic antisense	ENST00000432382	CTC-203F4.1	HCG2045138; Uncharacterized protein [Source:UniProtKB/TrEMBL;Acc:G3V3D3]	+	134368969	134680375	6.00401	4.49979
ASHGA5P021728	0.0116902	0.0498997	2.8367	up	noncoding	ENST00000539348	RP11-90D4.2	GENCODE	447	chr12	-	8509558	8542933	ACCCAGACAGGAAGGAAAATACCCGTACAGCCAACTTCCTTGAGGGTTCGTTCTTTTGCA	intergenic							4.98136	3.47715
ASHGA5P019274	0.00405036	0.0377672	2.83452	up	noncoding	NR_038934	CAMTA1	RefSeq	1011	chr1	+	6845383	6948261	AAGCCGGAAGATGATCATGGGAACAGCAATAGTAGTCATGTAAAAATCTTTTTACCGAAA	exon sense-overlapping	NM_001195563	CAMTA1	calmodulin-binding transcription activator 1 isoform 2	+	6845383	6932107	6.52112	5.01802
ASHGA5P019274	0.00405036	0.0377672	2.83452	up	noncoding	NR_038934	CAMTA1	RefSeq	1011	chr1	+	6845383	6948261	AAGCCGGAAGATGATCATGGGAACAGCAATAGTAGTCATGTAAAAATCTTTTTACCGAAA	exon sense-overlapping	NM_001242701	CAMTA1	calmodulin-binding transcription activator 1 isoform 3	+	6845383	6948261	6.52112	5.01802
ASHGA5P019274	0.00405036	0.0377672	2.83452	up	noncoding	NR_038934	CAMTA1	RefSeq	1011	chr1	+	6845383	6948261	AAGCCGGAAGATGATCATGGGAACAGCAATAGTAGTCATGTAAAAATCTTTTTACCGAAA	exon sense-overlapping	NM_015215	CAMTA1	calmodulin-binding transcription activator 1 isoform 1	+	6845383	7829766	6.52112	5.01802
ASHGA5P031872	0.0106024	0.0479985	2.83266	up	noncoding	ENST00000571975	RP11-96D1.10	GENCODE	3022	chr16	+	68258615	68261637	TTGGGCATCATATGGCTAATCACTCAGAGGTCACTAATCACTCTCCCTTTTCTTGTTTTT	exon sense-overlapping	NM_004555	NFATC3	nuclear factor of activated T-cells, cytoplasmic 3 isoform 2	+	68119268	68263162	4.93601	3.43385
ASHGA5P031872	0.0106024	0.0479985	2.83266	up	noncoding	ENST00000571975	RP11-96D1.10	GENCODE	3022	chr16	+	68258615	68261637	TTGGGCATCATATGGCTAATCACTCAGAGGTCACTAATCACTCTCCCTTTTCTTGTTTTT	exon sense-overlapping	NM_173163	NFATC3	nuclear factor of activated T-cells, cytoplasmic 3 isoform 3	+	68119268	68263162	4.93601	3.43385
ASHGA5P031872	0.0106024	0.0479985	2.83266	up	noncoding	ENST00000571975	RP11-96D1.10	GENCODE	3022	chr16	+	68258615	68261637	TTGGGCATCATATGGCTAATCACTCAGAGGTCACTAATCACTCTCCCTTTTCTTGTTTTT	exon sense-overlapping	NM_173165	NFATC3	nuclear factor of activated T-cells, cytoplasmic 3 isoform 1	+	68119268	68263162	4.93601	3.43385
ASHGA5P017424	0.0133438	0.0533213	2.83248	up	noncoding	uc001eks.3	LOC728875	UCSC_knowngene	775	chr1	-	144300511	144341755	AGGGATGGTGCAGAATGGGGAAATGGAGAGAGAACCTGAAAGAGCCCCAAACTCGAGGAC	intronic antisense	ENST00000538264	AL592284.2	Uncharacterized protein [Source:UniProtKB/TrEMBL;Acc:F5H305]	+	144339737	144521058	8.54815	7.04609
ASHGA5P018891	0.0045709	0.0387748	2.82407	up	noncoding	NR_029466	COX7A2	RefSeq	761	chr6	-	75947390	75953644	TTACCAAAAGGAGGATGATGAAATTCCACTGTATCTAAAGGGTGGGGTAGCTGATGCCCT	exon sense-overlapping	NM_001865	COX7A2	cytochrome c oxidase subunit 7A2, mitochondrial precursor	-	75947390	75953644	8.32806	6.83029
ASHGA5P043049	0.0287428	0.0825918	2.82122	up	noncoding	ENST00000568457	RP4-647J21.1	GENCODE	1911	chr7	-	44998597	45000508	CCCCTCAAAAAATGCTTAGACTTAATTATTTTAATTATCCTCACATATACTCCTCCGGCT	intergenic							5.94373	4.44742
ASHGA5P027224	0.00469507	0.0390427	2.80676	up	noncoding	ENST00000550426	RP11-493L12.2	GENCODE	683	chr12	-	47599680	47609983	AGGAGGCAGGAGGTGGAGCAAAACACACCAAGCCTGGTGCCAATCATTGACAATATTATG	intronic antisense	ENST00000546455	PCED1B	PC-esterase domain containing 1B [Source:HGNC Symbol;Acc:28255]	+	47473385	47630443	7.23616	5.74725
ASHGA5P034338	0.0140516	0.0547401	2.80486	up	noncoding	ENST00000416022	LENG8-AS1	GENCODE	582	chr19	-	54956213	54959780	GTACATAGGCATTTCTCTGAACTGCGCGCCACCTTTTGAGTGCCATCTGTTTCCGTCCAG	bidirectional	NM_052925	LENG8	leukocyte receptor cluster member 8	+	54960064	54973196	5.71572	4.22779
ASHGA5P019564	0.00429268	0.0383369	2.80174	up	noncoding	ENST00000492393	AC016629.2	GENCODE	412	chr19	+	59097651	59100861	CAGAGACAAGGAACAGTAAGAGGACCTTGTGCATGAATAATTTGTTTCCACACTACAGAG	intergenic							5.3203	3.83398
ASHGA5P037817	0.0335197	0.0909341	2.80047	up	noncoding	uc002zti.1	BC127858	UCSC_knowngene	283	chr22	+	21311690	21318877	ATGAAACACCCAAGTGTTAGGAACCAGAATAATCAGCCCTAATAGAGGGGAGGCTGATCA	intergenic							5.81627	4.3306
ASHGA5P026688	0.0085304	0.0443648	2.79955	up	noncoding	ENST00000533528	RP11-113K21.5	GENCODE	340	chr11	+	82783145	82803380	GAAACTCCAGTTGTTTACTATTATTATTAAAGTGGGAAACGGAGTTCGTTGATCAAATGG	bidirectional	NM_014488	RAB30	ras-related protein Rab-30	-	82692477	82782884	5.75392	4.26872
ASHGA5P033061	0.0256739	0.0768133	2.79564	up	noncoding	ENST00000441575	AC069363.1	GENCODE	393	chr17	+	34408991	34417208	GACTAGGGGGCTAAGACCCCTTCTAGAGATAAAAATAAAAGTCTTAAAGAGAAAGACCAA	intronic antisense	NM_002983	CCL3	C-C motif chemokine 3 precursor	-	34415602	34417506	4.21844	2.73526
ASHGA5P043271	0.0128956	0.0525337	2.79487	up	noncoding	AF143879		LincRNAs identified by Khalil et al	581	chr16	+	25271823	25272384	TTTTCCTTAAAATCCCTGGATCTAGAGGCACAACTGAGAAAGGTGGTCTTTGAATGCTAG	intergenic							5.23778	3.755
ASHGA5P042576	0.00533706	0.0400885	2.79485	up	noncoding	NR_034110	TRAF3IP2-AS1	RefSeq	2195	chr6	+	111804674	111899383	AGTGATAAAATAGATCAAGAAGATCAGAACAGGCTTAAATTGATGCTATAAAACCAATTA	intronic antisense	NM_001164281	TRAF3IP2	adapter protein CIKS isoform 3	-	111876580	111927477	5.61444	4.13167
ASHGA5P042576	0.00533706	0.0400885	2.79485	up	noncoding	NR_034110	TRAF3IP2-AS1	RefSeq	2195	chr6	+	111804674	111899383	AGTGATAAAATAGATCAAGAAGATCAGAACAGGCTTAAATTGATGCTATAAAACCAATTA	intronic antisense	NM_001164283	TRAF3IP2	adapter protein CIKS isoform 5	-	111876580	111888563	5.61444	4.13167
ASHGA5P042576	0.00533706	0.0400885	2.79485	up	noncoding	NR_034110	TRAF3IP2-AS1	RefSeq	2195	chr6	+	111804674	111899383	AGTGATAAAATAGATCAAGAAGATCAGAACAGGCTTAAATTGATGCTATAAAACCAATTA	intronic antisense	NM_147686	TRAF3IP2	adapter protein CIKS isoform 2	-	111876580	111927477	5.61444	4.13167
ASHGA5P018873	0.00493291	0.0391245	2.79398	up	noncoding	NR_003605	ZNFX1-AS1	RefSeq	695	chr20	+	47894714	47905795	GAGCGGTTTGGTTAGAGCAGCCAGCGGGTACAGAATGGATTTTGGAAGAGGGAGTCACCA	natural antisense	NM_021035	ZNFX1	NFX1-type zinc finger-containing protein 1	-	47862438	47894756	6.85008	5.36776
ASHGA5P016908	0.0234679	0.0730928	2.78675	up	noncoding	ENST00000435585	BX571672.5	GENCODE	336	chr1	-	143216055	143226395	GCAATCACAGCTAATTTTAAAACATGCACTCTGACAGAAAAGACATCTGAGAAACAAAAC	intergenic							6.16965	4.69107
ASHGA5P032046	0.0181337	0.0631462	2.78417	up	noncoding	ENST00000569162	AC137934.1	GENCODE	654	chr16	+	90282233	90289074	TCATGCTTTCTTCTGCCGTATCCATCGTTCAAACAAACATGAGGCAAAGCTAGACACATT	intergenic							6.25427	4.77703
ASHGA5P019670	0.00888849	0.0449346	2.78315	up	noncoding	uc001vmo.4	BC035106	UCSC_knowngene	2905	chr13	-	96325091	96329179	GTAATGTGAAGAATAAAGGAGTCAGATCCAGGAAACCCCATAACTATTATGAAACATTTC	bidirectional	NM_006260	DNAJC3	dnaJ homolog subfamily C member 3 precursor	+	96329392	96447243	5.97029	4.49357
ASHGA5P021210	0.0257228	0.0768832	2.7803	up	noncoding	ENST00000528437	RP11-693N9.2	GENCODE	586	chr11	-	104772275	104788872	GACAGCCAGGATAACGTGTCCAGGAGAGACAGCACAAGGGGCTCCATCTTCATCACACAA	intergenic							7.02103	5.54579
ASHGA5P023307	0.0114603	0.0494274	2.77902	up	noncoding	ENST00000577889	AC005154.6	GENCODE	426	chr7	-	30590183	30601135	TTATGACCGGTGTCTGCTCCATGGCAGCCTCTTCCTGGGACCAGATCTGAACAGTCTGGA	intergenic							4.68831	3.21373
ASHGA5P050627	0.0127879	0.0523404	2.77893	up	noncoding	uc002tjp.2	DKFZp686E10196	UCSC_knowngene	1901	chr2	+	113993106	113998402	GATTTCTCAACTCATTCATTTGTTCATTCATTCACTATACCATTACTGTCTATTATAAGG	intronic antisense	NM_013952	PAX8	paired box protein Pax-8 isoform PAX8C	-	113973573	114036498	7.52951	6.05497
ASHGA5P050627	0.0127879	0.0523404	2.77893	up	noncoding	uc002tjp.2	DKFZp686E10196	UCSC_knowngene	1901	chr2	+	113993106	113998402	GATTTCTCAACTCATTCATTTGTTCATTCATTCACTATACCATTACTGTCTATTATAAGG	intronic antisense	NM_013953	PAX8	paired box protein Pax-8 isoform PAX8D	-	113973573	114036498	7.52951	6.05497
ASHGA5P050627	0.0127879	0.0523404	2.77893	up	noncoding	uc002tjp.2	DKFZp686E10196	UCSC_knowngene	1901	chr2	+	113993106	113998402	GATTTCTCAACTCATTCATTTGTTCATTCATTCACTATACCATTACTGTCTATTATAAGG	intronic antisense	NM_013992	PAX8	paired box protein Pax-8 isoform PAX8E	-	113973573	114036498	7.52951	6.05497
ASHGA5P050627	0.0127879	0.0523404	2.77893	up	noncoding	uc002tjp.2	DKFZp686E10196	UCSC_knowngene	1901	chr2	+	113993106	113998402	GATTTCTCAACTCATTCATTTGTTCATTCATTCACTATACCATTACTGTCTATTATAAGG	natural antisense	NM_003466	PAX8	paired box protein Pax-8 isoform PAX8A	-	113973573	114036498	7.52951	6.05497
ASHGA5P030137	0.0103712	0.0475551	2.77325	up	noncoding	ENST00000568345	RP11-1007O24.2	GENCODE	1135	chr15	-	72757468	72758603	ACCTCAAAATATGTTGAATCTTGCCAACATTAAATCAACACTGGTGTTCTTGCCTGTTAA	intergenic							5.16401	3.69243
ASHGA5P029468	0.0119101	0.0504239	2.76863	up	noncoding	ENST00000558478	RP11-468E2.5	GENCODE	747	chr14	+	24608653	24609653	AGGAAACTGCCTTATTTTTGAAGTTGCTGGTTGGGATTTCTCTGTTCTTTCAGCCCCTGG	natural antisense	NM_016049	EMC9	ER membrane protein complex subunit 9	-	24608173	24610797	4.74509	3.27592
ASHGA5P041270	0.0112914	0.0491399	2.76044	up	noncoding	NR_036530	LOC100289230	RefSeq	1876	chr5	+	98264837	98266713	CTGTCGTATTGTGCCATCAAACATGCTATTCGAAAAAAGATCTTGCCCAATTTGTAATAA	intergenic							5.00932	3.54443
ASHGA5P047238	0.00539542	0.0400885	2.75525	up	noncoding	ENST00000561822	RP11-5N23.3	GENCODE	697	chr10	+	6628185	6628882	AAACAAAACCACACCTGGATTGCCTGGTACTTAAATAAAATGCACTATGATGATTGAAGA	intergenic							6.32613	4.86395
ASHGA5P049778	0.0230981	0.0724695	2.75229	up	noncoding	ENST00000579003	hsa-mir-142	GENCODE	1625	chr17	-	56408244	56409869	CGGACAGACAGACAGTGCAGTCACCCATAAAGTAGAAAGCACTACTAACAGCACTGGAGG	intergenic							7.86455	6.40392
ASHGA5P044525	0.00159073	0.0287561	2.74669	up	noncoding	uc003ysb.3	BC106081	UCSC_knowngene	574	chr8	-	128240803	128241377	GTTAATACTATGTAACCCCAGTGTTTTCAACTGTTTGTGATTCAATGTTACCCAGTTTTC	intergenic							5.68417	4.22648
ASHGA5P045019	0.00825087	0.0439647	2.74668	up	noncoding	ENST00000517915	RP11-89K10.1	GENCODE	317	chr8	+	127601458	127647029	GAAAAGTCTTGGGGATCCTGAATTCATTAAACAGCTTCTTCTTTTGCCCTGGTTCCTCAT	intergenic							4.94548	3.48779
ASHGA5P047893	0.0296507	0.0842397	2.74332	up	noncoding	TCONS_00017441	XLOC_008033	LincRNAs identified by Cabili et al	2873	chrX	+	102213937	102219282	TTGTGTTAAGGGGTAGGGGAAGAGCAAGTGAAGGATGCAGATTAATTTCTATTTAGGAAT	intergenic							5.05137	3.59544
ASHGA5P022711	0.00987375	0.0465913	2.73943	up	noncoding	ENST00000561289	CTD-3110H11.2	GENCODE	554	chr15	+	50647741	50648611	GAAGGAACGAGGGCGTCTGGGCATGGCTTTCCCAACCTAGTAACTGCAACTTTTAGCATC	bidirectional	NM_002041	GABPB1	GA-binding protein subunit beta-1 isoform gamma 1	-	50578076	50647605	5.4096	3.95573
ASHGA5P022711	0.00987375	0.0465913	2.73943	up	noncoding	ENST00000561289	CTD-3110H11.2	GENCODE	554	chr15	+	50647741	50648611	GAAGGAACGAGGGCGTCTGGGCATGGCTTTCCCAACCTAGTAACTGCAACTTTTAGCATC	bidirectional	NM_005254	GABPB1	GA-binding protein subunit beta-1 isoform beta 1	-	50569388	50647605	5.4096	3.95573
ASHGA5P022711	0.00987375	0.0465913	2.73943	up	noncoding	ENST00000561289	CTD-3110H11.2	GENCODE	554	chr15	+	50647741	50648611	GAAGGAACGAGGGCGTCTGGGCATGGCTTTCCCAACCTAGTAACTGCAACTTTTAGCATC	bidirectional	NM_016654	GABPB1	GA-binding protein subunit beta-1 isoform beta 2	-	50569388	50647605	5.4096	3.95573
ASHGA5P022711	0.00987375	0.0465913	2.73943	up	noncoding	ENST00000561289	CTD-3110H11.2	GENCODE	554	chr15	+	50647741	50648611	GAAGGAACGAGGGCGTCTGGGCATGGCTTTCCCAACCTAGTAACTGCAACTTTTAGCATC	bidirectional	NM_016655	GABPB1	GA-binding protein subunit beta-1 isoform gamma 2	-	50578076	50647605	5.4096	3.95573
ASHGA5P022711	0.00987375	0.0465913	2.73943	up	noncoding	ENST00000561289	CTD-3110H11.2	GENCODE	554	chr15	+	50647741	50648611	GAAGGAACGAGGGCGTCTGGGCATGGCTTTCCCAACCTAGTAACTGCAACTTTTAGCATC	bidirectional	NM_181427	GABPB1	GA-binding protein subunit beta-1 isoform gamma 2	-	50578076	50647605	5.4096	3.95573
ASHGA5P021856	0.00771573	0.0433457	2.73628	up	noncoding	ENST00000542598	RP11-809N8.4	GENCODE	334	chr11	+	73116341	73121717	GCCTGGTCAGGTAAAAAGGTAAGGATGAAGAAGACAGTGGTCCAAGGTGACTCCCAATGC	natural antisense	NM_015159	FAM168A	protein FAM168A	-	73117027	73309228	5.28512	3.8329
ASHGA5P042519	0.00919307	0.0455504	2.73533	up	noncoding	ENST00000443221	RP11-250B2.3	GENCODE	758	chr6	+	81153172	81172924	TTCGAATTATCTGTTATGAATTGTGGTTTTGTTATTAAATAGACATTTTGTTTAATTCTT	intergenic							4.61183	3.16012
ASHGA5P030884	0.0108937	0.0486678	2.73325	up	noncoding	ENST00000563449	RP11-20I23.8	GENCODE	1859	chr16	-	2604060	2606539	TTTAAAAGCACTTTTAAGCATCAATTGTGAAATAAAAAGCCCGAGCAAAAGCCCTCTTTG	intronic antisense	NM_001261816	PDPK1	3-phosphoinositide-dependent protein kinase 1 isoform 3	+	2587964	2653191	6.2696	4.81898
ASHGA5P030884	0.0108937	0.0486678	2.73325	up	noncoding	ENST00000563449	RP11-20I23.8	GENCODE	1859	chr16	-	2604060	2606539	TTTAAAAGCACTTTTAAGCATCAATTGTGAAATAAAAAGCCCGAGCAAAAGCCCTCTTTG	intronic antisense	NM_002613	PDPK1	3-phosphoinositide-dependent protein kinase 1 isoform 1	+	2587964	2653191	6.2696	4.81898
ASHGA5P030884	0.0108937	0.0486678	2.73325	up	noncoding	ENST00000563449	RP11-20I23.8	GENCODE	1859	chr16	-	2604060	2606539	TTTAAAAGCACTTTTAAGCATCAATTGTGAAATAAAAAGCCCGAGCAAAAGCCCTCTTTG	intronic antisense	NM_031268	PDPK1	3-phosphoinositide-dependent protein kinase 1 isoform 2	+	2587964	2653191	6.2696	4.81898
ASHGA5P040375	0.0352709	0.0941612	2.72996	up	noncoding	ENST00000504053	RP11-5N11.1	pseudogene	364	chr5	-	31725645	31726009	GCCTGCATCTCATACCAAAACTAGAGGCATCTCTAAAAACAGATTCCAAAGCACATTACA								5.59878	4.1499
ASHGA5P047886	0.000591487	0.0207526	2.72945	up	noncoding	ENST00000526769	GVINP1	GENCODE	544	chr11	-	6742640	6767650	CTACTCTCCATGCACGTCTCTCTGGAGCAACCTGAAGACAGGATCTTGGCCTCAGGACAG	intergenic							6.29219	4.84358
ASHGA5P020449	0.0167722	0.0604362	2.72646	up	noncoding	NR_038402	LOC100507387	RefSeq	1005	chr5	+	175546551	175552168	TTGCCACTAACATTGATGAACCAGATGCATGTCACCAGCCCATCACGGGCACCATGGGCC	intergenic							5.98987	4.54284
ASHGA5P028713	0.00652938	0.0412662	2.72525	up	noncoding	ENST00000431928	AL592284.1	GENCODE	1063	chr1	-	144479977	144481765	TGTTTGTGAAAATGGCATAAAGCCGGTTTCTTGTGCTGGTTATGCAATTTTCAGAATGTG	intronic antisense	ENST00000538264	AL592284.2	Uncharacterized protein [Source:UniProtKB/TrEMBL;Acc:F5H305]	+	144339737	144521058	4.70181	3.25542
ASHGA5P054299	0.00861833	0.0443672	2.71958	up	noncoding	ENST00000454631	RP11-295G20.2	GENCODE	458	chr1	-	231658262	231664302	TCTACAAGCCTCACAGCATGCACTGTTACTAAAAAGACGATGCGTCCTCCTGGACCTGAG	natural antisense	ENST00000366639	TSNAX	translin-associated factor X [Source:HGNC Symbol;Acc:12380]	+	231664286	231702270	5.64583	4.20244
ASHGA5P040924	0.00844336	0.0441638	2.71945	up	noncoding	ENST00000562870	CTC-205M6.5	GENCODE	3088	chr5	-	180211781	180214869	GTCATCTAGGAGACTGGTTCTATTATTTACGTAGATGTTCTTGAATTAAAGGATGGGAAT	intergenic							5.47071	4.0274
ASHGA5P015065	0.00719223	0.0425202	2.71816	up	noncoding	uc001vdx.3	DLEU2	UCSC_knowngene	1406	chr13	-	50618047	50656139	ATCCAGGAAGTAGCAAGAAATGTGGATAATTACTGTACCTTCCTCATGGAAAAAGTTTTA	bidirectional	ENST00000378180	DLEU1	deleted in lymphocytic leukemia 1 (non-protein coding) [Source:HGNC Symbol;Acc:13747]	+	50656306	50679433	4.80944	3.36681
ASHGA5P017839	0.0218556	0.0703236	2.71779	up	noncoding	ENST00000446290	RP11-274B18.2	GENCODE	338	chr9	-	71158456	71161505	GATGTGCAAGTGTTGCCACCTTTAAATGGCCCCTTACTCTCATAATCAGTGCTGAGTAGT	intergenic							5.39949	3.95706
ASHGA5P033530	0.0059804	0.0405778	2.71616	up	noncoding	ENST00000564351	RP11-666N19.1	GENCODE	1562	chr18	-	18526866	18528428	GACACTTGTATGTTAATCCTATAAATTGGTTTCTTGTACCATGTAGGATGGTTTGGCTAT	intergenic							4.94523	3.50367
ASHGA5P036180	0.0404124	0.102855	2.70503	up	noncoding	NR_040248	ZEB2-AS1	RefSeq	430	chr2	+	145277180	145278465	TCAATAAAACTTTTCCTGGGCTGGATAGCAAAGGACACCTTTGGTTACCTGAATGAACAG	natural antisense	NM_001171653	ZEB2	zinc finger E-box-binding homeobox 2 isoform 2	-	145141941	145277958	5.05808	3.62244
ASHGA5P036180	0.0404124	0.102855	2.70503	up	noncoding	NR_040248	ZEB2-AS1	RefSeq	430	chr2	+	145277180	145278465	TCAATAAAACTTTTCCTGGGCTGGATAGCAAAGGACACCTTTGGTTACCTGAATGAACAG	natural antisense	NM_014795	ZEB2	zinc finger E-box-binding homeobox 2 isoform 1	-	145141941	145277958	5.05808	3.62244
ASHGA5P044388	0.0210084	0.068939	2.70118	up	noncoding	ENST00000522817	GS1-251I9.4	GENCODE	4275	chr8	-	92072136	92082351	ACAGTTCGGTGCTGAAAAAAGCATTTCTATTAAACTTCAAGACAGAATGAATGACCATAG	bidirectional	NM_016023	OTUD6B	OTU domain-containing protein 6B	+	92082423	92099323	4.24794	2.81434
ASHGA5P023242	0.0377257	0.0985465	2.69825	up	noncoding	ENST00000575606	RP11-874J12.2	GENCODE	344	chr18	+	3594091	3597370	CTGGCAACAGATGGATATCTGAGAGCCAGCGAACTTTCTTTACCTCCTAGTATCATTTCA	intronic antisense	NM_001003809	DLGAP1	disks large-associated protein 1 isoform 2	-	3496029	3845358	5.41953	3.98751
ASHGA5P023242	0.0377257	0.0985465	2.69825	up	noncoding	ENST00000575606	RP11-874J12.2	GENCODE	344	chr18	+	3594091	3597370	CTGGCAACAGATGGATATCTGAGAGCCAGCGAACTTTCTTTACCTCCTAGTATCATTTCA	intronic antisense	NM_001242761	DLGAP1	disks large-associated protein 1 isoform 3	-	3502142	4455266	5.41953	3.98751
ASHGA5P023242	0.0377257	0.0985465	2.69825	up	noncoding	ENST00000575606	RP11-874J12.2	GENCODE	344	chr18	+	3594091	3597370	CTGGCAACAGATGGATATCTGAGAGCCAGCGAACTTTCTTTACCTCCTAGTATCATTTCA	intronic antisense	NM_001242762	DLGAP1	disks large-associated protein 1 isoform 4	-	3496029	3874767	5.41953	3.98751
ASHGA5P023242	0.0377257	0.0985465	2.69825	up	noncoding	ENST00000575606	RP11-874J12.2	GENCODE	344	chr18	+	3594091	3597370	CTGGCAACAGATGGATATCTGAGAGCCAGCGAACTTTCTTTACCTCCTAGTATCATTTCA	intronic antisense	NM_001242763	DLGAP1	disks large-associated protein 1 isoform 5	-	3496029	3874767	5.41953	3.98751
ASHGA5P023242	0.0377257	0.0985465	2.69825	up	noncoding	ENST00000575606	RP11-874J12.2	GENCODE	344	chr18	+	3594091	3597370	CTGGCAACAGATGGATATCTGAGAGCCAGCGAACTTTCTTTACCTCCTAGTATCATTTCA	intronic antisense	NM_001242764	DLGAP1	disks large-associated protein 1 isoform 6	-	3496029	3874253	5.41953	3.98751
ASHGA5P023242	0.0377257	0.0985465	2.69825	up	noncoding	ENST00000575606	RP11-874J12.2	GENCODE	344	chr18	+	3594091	3597370	CTGGCAACAGATGGATATCTGAGAGCCAGCGAACTTTCTTTACCTCCTAGTATCATTTCA	intronic antisense	NM_001242765	DLGAP1	disks large-associated protein 1 isoform 7	-	3502142	3845358	5.41953	3.98751
ASHGA5P023242	0.0377257	0.0985465	2.69825	up	noncoding	ENST00000575606	RP11-874J12.2	GENCODE	344	chr18	+	3594091	3597370	CTGGCAACAGATGGATATCTGAGAGCCAGCGAACTTTCTTTACCTCCTAGTATCATTTCA	intronic antisense	NM_001242766	DLGAP1	disks large-associated protein 1 isoform 8	-	3496029	3845358	5.41953	3.98751
ASHGA5P023242	0.0377257	0.0985465	2.69825	up	noncoding	ENST00000575606	RP11-874J12.2	GENCODE	344	chr18	+	3594091	3597370	CTGGCAACAGATGGATATCTGAGAGCCAGCGAACTTTCTTTACCTCCTAGTATCATTTCA	intronic antisense	NM_004746	DLGAP1	disks large-associated protein 1 isoform 1	-	3496029	4455266	5.41953	3.98751
ASHGA5P035180	0.0073441	0.0427228	2.69704	up	noncoding	ENST00000448595	AC109826.2	GENCODE	548	chr2	-	99385423	99388543	GAAGGCTGAAAAACAGCTGTTAAAATGGCTTGTTTGTTTGAAGATGAATGAGAGTACACA	intergenic							5.31933	3.88796
ASHGA5P025721	0.00789174	0.0434582	2.69683	up	noncoding	NR_028356	MRPL30	RefSeq	3157	chr2	+	99797541	99816020	TTTTATTTAAAGATGATACCTGGAGGGGTGGGGAGAAGTAAGAATTGTAAGGGAGGTTCA	exon sense-overlapping	NM_145212	MRPL30	39S ribosomal protein L30, mitochondrial precursor	+	99797541	99816020	4.93692	3.50566
ASHGA5P018362	0.00629459	0.0410595	2.69544	up	noncoding	ENST00000452565	GS1-124K5.4	GENCODE	454	chr7	+	65958772	65960459	CTGAGCCTGTGATGCCGAAGGACCTGTTCAAAGTATTTTCTGTAACTCCAACTGTAACTT	intergenic							6.34106	4.91054
ASHGA5P018429	0.0059458	0.0404867	2.69493	up	noncoding	NR_037176	LOC100507463	RefSeq	1272	chr6	+	32811862	32814277	TACAGTAAGAGGAAGTCTGCATTATCACGAGGAGCTTGGAAAGGAGGTAACACACTCAAG	intronic antisense	NM_004159	PSMB8	proteasome subunit beta type-8 isoform E1 proprotein	-	32808493	32812712	4.7729	3.34265
ASHGA5P018429	0.0059458	0.0404867	2.69493	up	noncoding	NR_037176	LOC100507463	RefSeq	1272	chr6	+	32811862	32814277	TACAGTAAGAGGAAGTCTGCATTATCACGAGGAGCTTGGAAAGGAGGTAACACACTCAAG	natural antisense	NM_000593	TAP1	antigen peptide transporter 1	-	32812985	32821748	4.7729	3.34265
ASHGA5P022623	0.00470548	0.0390427	2.6923	up	noncoding	ENST00000559884	WASH3P	GENCODE	427	chr15	+	102501805	102506958	TCTTCAGCAGCCAACAAATATTTACCCAGCAGTGCTCGTGTGCAAGGCAGTGTGGGAATC	intergenic							5.73891	4.31008
ASHGA5P029119	0.00385808	0.0374666	2.69068	up	noncoding	ENST00000555403	RP11-247L20.4	GENCODE	446	chr14	-	50793243	50794627	ATTCTGAGTAAGTCTGTATGCTATCAAGAACACAAGAATGCAGGATCATGGGAAATGCAC	intronic antisense	ENST00000358473	ATP5S	ATP synthase, H+ transporting, mitochondrial Fo complex, subunit s (factor B) [Source:HGNC Symbol;Acc:18799]	+	50785951	50802276	5.37144	3.94347
ASHGA5P029119	0.00385808	0.0374666	2.69068	up	noncoding	ENST00000555403	RP11-247L20.4	GENCODE	446	chr14	-	50793243	50794627	ATTCTGAGTAAGTCTGTATGCTATCAAGAACACAAGAATGCAGGATCATGGGAAATGCAC	intronic antisense	ENST00000553905	RP11-247L20.2	ATP synthase coupling factor B-like 1; ATP synthase subunit s, mitochondrial; Uncharacterized protein [Source:UniProtKB/TrEMBL;Acc:Q8WXQ4]	+	50785951	50802276	5.37144	3.94347
ASHGA5P037679	0.00969154	0.0463839	2.68459	up	noncoding	NR_033531	IFT27	RefSeq	782	chr22	-	37168446	37172177	GCTACTTGTTCTGGTTCTGGAGAAGAAAGAAAACAACATTTGACATTGATCTGTATTTTG	exon sense-overlapping	NM_001177701	IFT27	intraflagellar transport protein 27 homolog isoform 1	-	37154245	37172177	4.76528	3.34058
ASHGA5P037679	0.00969154	0.0463839	2.68459	up	noncoding	NR_033531	IFT27	RefSeq	782	chr22	-	37168446	37172177	GCTACTTGTTCTGGTTCTGGAGAAGAAAGAAAACAACATTTGACATTGATCTGTATTTTG	exon sense-overlapping	NM_006860	IFT27	intraflagellar transport protein 27 homolog isoform 2	-	37154245	37172177	4.76528	3.34058
ASHGA5P038749	0.00860104	0.0443672	2.68333	up	noncoding	ENST00000468437	SPATA1	GENCODE	383	chr1	+	84972064	84972684	GGGATCTTCTCGAGGTTTGACTTTACTGGCTTCTTAGCTCTTGAATCGGTTTTTCTGAAG	intronic antisense	NM_005274	GNG5	guanine nucleotide-binding protein G(I)/G(S)/G(O) subunit gamma-5 precursor	-	84964005	84972262	4.61975	3.19573
ASHGA5P035939	0.00253912	0.0337247	2.67983	up	noncoding	ENST00000496886	RP11-711M9.1	GENCODE	710	chr2	+	74213652	74220867	GCTTGTTCTTCTGGCATTTGTTTCCTTGTAGTTTAGTGAGTTATCAGTAAAACCTATCAA	intergenic							5.50063	4.07849
ASHGA5P027204	0.0442587	0.108945	2.67982	up	noncoding	ENST00000553202	RP11-350F4.2	GENCODE	5008	chr12	-	44112795	44117803	CATGAACACCTCTTTAATCACAAGTCCTCAACTCCAAGGTTAGCTTTATTTCAACTTTTA	intergenic							5.784	4.36186
ASHGA5P047453	0.00508507	0.0394114	2.67439	up	noncoding	ENST00000562082	RP11-119F7.5	GENCODE	2295	chr10	+	70458256	70460551	TTTGGTGCACAGCAGGTTGTACATGATTTCATGTTTATGTAGCAAAATGCATTGAAATGT	intergenic							4.66299	3.24378
ASHGA5P014890	0.00428999	0.0383369	2.67295	up	noncoding	ENST00000423223	RP11-534G20.3	GENCODE	507	chr10	+	29698514	29772114	TGATACCTTTGATCCAGAACTTGCAGCAACAATAGATCCATCTTCGGTTGTGAATCCGGC	intronic antisense	NM_003174	SVIL	supervillin isoform 1	-	29746276	30024730	5.19981	3.78137
ASHGA5P014890	0.00428999	0.0383369	2.67295	up	noncoding	ENST00000423223	RP11-534G20.3	GENCODE	507	chr10	+	29698514	29772114	TGATACCTTTGATCCAGAACTTGCAGCAACAATAGATCCATCTTCGGTTGTGAATCCGGC	intronic antisense	NM_021738	SVIL	supervillin isoform 2	-	29746276	29923901	5.19981	3.78137
ASHGA5P038046	0.00488127	0.0391245	2.67093	up	noncoding	NR_038953	LOC100507564	RefSeq	1181	chr1	+	53704281	53708455	TGATGAAGTTTGCAAATCAGCACTTTACCCCCAAATTAACAACAGCTTGTATGGAAAAAA	natural antisense	NM_001018054	LRP8	low-density lipoprotein receptor-related protein 8 isoform 4 precursor	-	53708040	53793821	6.80952	5.39218
ASHGA5P038046	0.00488127	0.0391245	2.67093	up	noncoding	NR_038953	LOC100507564	RefSeq	1181	chr1	+	53704281	53708455	TGATGAAGTTTGCAAATCAGCACTTTACCCCCAAATTAACAACAGCTTGTATGGAAAAAA	natural antisense	NM_002370	MAGOH	protein mago nashi homolog	-	53692563	53704282	6.80952	5.39218
ASHGA5P038046	0.00488127	0.0391245	2.67093	up	noncoding	NR_038953	LOC100507564	RefSeq	1181	chr1	+	53704281	53708455	TGATGAAGTTTGCAAATCAGCACTTTACCCCCAAATTAACAACAGCTTGTATGGAAAAAA	natural antisense	NM_004631	LRP8	low-density lipoprotein receptor-related protein 8 isoform 1 precursor	-	53708040	53793821	6.80952	5.39218
ASHGA5P038046	0.00488127	0.0391245	2.67093	up	noncoding	NR_038953	LOC100507564	RefSeq	1181	chr1	+	53704281	53708455	TGATGAAGTTTGCAAATCAGCACTTTACCCCCAAATTAACAACAGCTTGTATGGAAAAAA	natural antisense	NM_017522	LRP8	low-density lipoprotein receptor-related protein 8 isoform 3 precursor	-	53708040	53793821	6.80952	5.39218
ASHGA5P038046	0.00488127	0.0391245	2.67093	up	noncoding	NR_038953	LOC100507564	RefSeq	1181	chr1	+	53704281	53708455	TGATGAAGTTTGCAAATCAGCACTTTACCCCCAAATTAACAACAGCTTGTATGGAAAAAA	natural antisense	NM_033300	LRP8	low-density lipoprotein receptor-related protein 8 isoform 2 precursor	-	53708040	53793821	6.80952	5.39218
ASHGA5P023321	0.0178437	0.0624428	2.66852	up	noncoding	NR_038889	LOC401320	RefSeq	3871	chr7	-	30587972	30617395	CCTCTTCCTGAAGAAATGCTGAGGCAGTGTCACGCTGGTGTCTGTCCTCCTTACAGAATG	intergenic							5.64305	4.22701
ASHGA5P039268	0.00678048	0.04194	2.66778	up	noncoding	ENST00000420226	TM4SF19-AS1	GENCODE	322	chr3	+	196045200	196050544	ATCCATGGATCACCTGGAAGTTTACAATGTGATTTAAAATGCATTCTATCATTCCACCGA	natural antisense	NM_001204897	TM4SF19	transmembrane 4 L6 family member 19 isoform 2	-	196050416	196065291	4.68081	3.26517
ASHGA5P039268	0.00678048	0.04194	2.66778	up	noncoding	ENST00000420226	TM4SF19-AS1	GENCODE	322	chr3	+	196045200	196050544	ATCCATGGATCACCTGGAAGTTTACAATGTGATTTAAAATGCATTCTATCATTCCACCGA	natural antisense	NM_001204898	TM4SF19	transmembrane 4 L6 family member 19 isoform 3	-	196050416	196065291	4.68081	3.26517
ASHGA5P039268	0.00678048	0.04194	2.66778	up	noncoding	ENST00000420226	TM4SF19-AS1	GENCODE	322	chr3	+	196045200	196050544	ATCCATGGATCACCTGGAAGTTTACAATGTGATTTAAAATGCATTCTATCATTCCACCGA	natural antisense	NM_138461	TM4SF19	transmembrane 4 L6 family member 19 isoform 1	-	196050416	196065291	4.68081	3.26517
ASHGA5P056799	0.000485161	0.0192003	2.66138	up	noncoding	TCONS_00008739	XLOC_003422	LincRNAs identified by Cabili et al	734	chr4	+	1549138	1550198	TGGCCCAGGTGCCAGCAAAGACAATCGCCGGATGTCTGAGTACCCCCTCTCCTTCCAAAA	intergenic							12.0625	10.6503
ASHGA5P017980	0.00375827	0.0371269	2.65877	up	noncoding	ENST00000447883	RP11-277L2.3	GENCODE	561	chr1	-	149576590	149577296	CTCAAAGCTGCCACACACGTCGCGGTCAGAGAACTGGGAAGGGGGCGCTGGGTCCGAGGT	intergenic							9.12038	7.70962
ASHGA5P049946	0.020328	0.0675343	2.65563	up	noncoding	ENST00000581471	RP11-835E18.2	GENCODE	1564	chr18	+	5237824	5239388	CCCTGGCCACTACCAGGAAAAAGTATTTACTTTTAAAACTTGAATGTATATCTTTACCGT	intergenic							5.17283	3.76378
ASHGA5P055023	0.022728	0.0718183	2.6478	up	noncoding	ENST00000536855	RP11-809N8.4	GENCODE	285	chr11	+	73116341	73121727	AATTCAGAAATCTTCAAATGTTTCTACTAAATGAGATTAAAAAAAATAAAACAAGAGGCT	intronic antisense	NM_015159	FAM168A	protein FAM168A	-	73117027	73309228	4.98315	3.57835
ASHGA5P026048	0.00943181	0.0460163	2.64647	up	noncoding	NR_033839	FLJ39051	RefSeq	753	chr11	-	126211611	126225482	TGTGGCCAAGAAATGTATTCTCTCACTTTGGACTTAGGAGTCCAAAGAGAAGCCCAGAAA	intronic antisense	NM_014026	DCPS	m7GpppX diphosphatase	+	126173646	126215644	4.76072	3.35665
ASHGA5P058468	0.00687802	0.0420015	2.64461	up	noncoding	uc003uui.2	PMS2P1	UCSC_knowngene	1429	chr7	-	99918262	99933930	TGCACCATAAAGAATTTCAAAGGAATATTAAGAAGGACTCCTAGAAGTACCCCACCCCAC	natural antisense	NM_001004351	SPDYE3	speedy protein E3	+	99905324	99919819	7.82964	6.42658
ASHGA5P029998	0.0116732	0.0498651	2.6432	up	noncoding	ENST00000559003	CTD-2651B20.3	GENCODE	630	chr15	-	45543883	45548200	TGTAAGAACTTCTAACAGGTACATTCCTGTAAGCATTACCCACCACTGGACTAGGCACTG	intronic antisense	NM_004212	SLC28A2	sodium/nucleoside cotransporter 2	+	45544427	45568132	5.19892	3.79663
ASHGA5P053769	0.0314174	0.0873905	2.62916	up	noncoding	NR_024532	ALG2	RefSeq	2993	chr9	-	101978706	101984246	TGAATATATCATGCCCCTATTAAAACTTGTACATGGCTCCCCATTGGTTTTTGGAGAAAA	exon sense-overlapping	NM_033087	ALG2	alpha-1,3/1,6-mannosyltransferase ALG2	-	101978706	101984246	6.61894	5.22433
ASHGA5P044292	0.0131877	0.0529912	2.62882	up	noncoding	NR_034003	LOC100130298	RefSeq	528	chr8	-	61878679	61880307	TTCACATCTCCAAAGGTCCTCTACCTTAGAAGAAGAAAGAAAGAGGGAAAGAGAAATAAA	intergenic							5.86514	4.47073
ASHGA5P050221	0.00972808	0.0464078	2.62664	up	noncoding	NR_038332	LOC100505622	RefSeq	701	chr19	+	42636780	42641251	TAAAAATACCTTGGTAATTTATCACTTAATAAATATCCAATAAATGCTATTATGTGCCAA	intronic antisense	ENST00000524801	POU2F2	POU class 2 homeobox 2 [Source:HGNC Symbol;Acc:9213]	-	42620942	42680177	5.35526	3.96204
ASHGA5P050221	0.00972808	0.0464078	2.62664	up	noncoding	NR_038332	LOC100505622	RefSeq	701	chr19	+	42636780	42641251	TAAAAATACCTTGGTAATTTATCACTTAATAAATATCCAATAAATGCTATTATGTGCCAA	intronic antisense	ENST00000532176	POU2F2	POU class 2 homeobox 2 [Source:HGNC Symbol;Acc:9213]	-	42621142	42700737	5.35526	3.96204
ASHGA5P054629	0.00396907	0.0377672	2.62126	up	noncoding	NR_028326	LOC100133161	RefSeq	4614	chr11	-	126986	131920	GTTTTGGTAGGTAATTTATTTGGAGTGAGTTTCTGCGCCAAGCCCGAATTTTTTATTTTA	intergenic							7.46427	6.07401
ASHGA5P041887	0.00599578	0.0405793	2.62057	up	noncoding	uc003ped.4	GUSBP4	UCSC_knowngene	1530	chr6	-	58272359	58287724	CGCATCGGGACCGGACCCGCAGCTTGTGGTCACCATGGGCTTCACGGGGTTCGGGGTTCG	intergenic							6.46878	5.0789
ASHGA5P037998	0.00624697	0.0409695	2.62026	up	noncoding	TCONS_00024244	XLOC_011623	LincRNAs identified by Cabili et al	1840	chr16	+	2693654	2696114	GTTGCAATATTGCCTTTAAAAGCACTTTTAAGCATCAATTGTGAAATAAAAAGCCCGAGC	intergenic							6.73435	5.34464
ASHGA5P031508	0.00408911	0.0377672	2.61757	up	noncoding	ENST00000415647	RP11-46A10.4	GENCODE	1440	chr1	-	180918834	180924023	CTCAATTGGGATGGGGAAGCATCTGAGCAAAAAACCCCAGGAAAAATAAAAATTCTAGCC	natural antisense	ENST00000367588	KIAA1614	KIAA1614 [Source:HGNC Symbol;Acc:29327]	+	180882324	180920750	5.2963	3.90807
ASHGA5P025907	0.00452936	0.0386604	2.61679	up	noncoding	NR_046172	RAB18	RefSeq	4941	chr10	+	27793102	27831166	GCAACAATAGGATACTGCTGGTCAAGAGAGGTTTAGAACATTAACTCCCAGCTATTATAG	exon sense-overlapping	NM_001256410	RAB18	ras-related protein Rab-18 isoform 2	+	27793102	27831166	4.59976	3.21196
ASHGA5P025907	0.00452936	0.0386604	2.61679	up	noncoding	NR_046172	RAB18	RefSeq	4941	chr10	+	27793102	27831166	GCAACAATAGGATACTGCTGGTCAAGAGAGGTTTAGAACATTAACTCCCAGCTATTATAG	exon sense-overlapping	NM_001256411	RAB18	ras-related protein Rab-18 isoform 3	+	27793102	27831166	4.59976	3.21196
ASHGA5P025907	0.00452936	0.0386604	2.61679	up	noncoding	NR_046172	RAB18	RefSeq	4941	chr10	+	27793102	27831166	GCAACAATAGGATACTGCTGGTCAAGAGAGGTTTAGAACATTAACTCCCAGCTATTATAG	exon sense-overlapping	NM_001256412	RAB18	ras-related protein Rab-18 isoform 5	+	27793102	27831166	4.59976	3.21196
ASHGA5P025907	0.00452936	0.0386604	2.61679	up	noncoding	NR_046172	RAB18	RefSeq	4941	chr10	+	27793102	27831166	GCAACAATAGGATACTGCTGGTCAAGAGAGGTTTAGAACATTAACTCCCAGCTATTATAG	exon sense-overlapping	NM_001256415	RAB18	ras-related protein Rab-18 isoform 4	+	27793102	27831166	4.59976	3.21196
ASHGA5P025907	0.00452936	0.0386604	2.61679	up	noncoding	NR_046172	RAB18	RefSeq	4941	chr10	+	27793102	27831166	GCAACAATAGGATACTGCTGGTCAAGAGAGGTTTAGAACATTAACTCCCAGCTATTATAG	exon sense-overlapping	NM_021252	RAB18	ras-related protein Rab-18 isoform 1	+	27793102	27831166	4.59976	3.21196
ASHGA5P031693	0.0359966	0.0955179	2.61666	up	noncoding	ENST00000569782	RP11-452L6.7	GENCODE	647	chr16	+	31519791	31520569	GCATCTTCACTCCGAAGCAGAAATTTGCCAAAAAAGCATCCTCTTTTTATCAGAAAATAA	natural antisense	ENST00000564807	C16orf58	chromosome 16 open reading frame 58 [Source:HGNC Symbol;Acc:25848]	-	31508199	31520630	5.66087	4.27315
ASHGA5P058630	0.0109695	0.0488084	2.61474	up	noncoding	uc011hzu.2	HLA-DQB	UCSC_knowngene	779	chr6_mcf_hap5	-	3961838	3964231	TTCCTCGGGCTGGGCCTTATTATCCATCACAGGAGTCAGAAAGACCTCAAGGGCCTCCAC	intergenic							6.51555	5.12889
ASHGA5P021779	0.000769174	0.0232064	2.61441	up	noncoding	NR_037793	LRR1	RefSeq	1853	chr14	+	50065414	50081390	AGTTATGAAGCTAAGGGAGAACATTGAGCAATTCTTCACCAAATTTGTAGATGAGGGGAA	exon sense-overlapping	NM_152329	LRR1	leucine-rich repeat protein 1 isoform 1	+	50065414	50081390	5.21067	3.82419
ASHGA5P021779	0.000769174	0.0232064	2.61441	up	noncoding	NR_037793	LRR1	RefSeq	1853	chr14	+	50065414	50081390	AGTTATGAAGCTAAGGGAGAACATTGAGCAATTCTTCACCAAATTTGTAGATGAGGGGAA	exon sense-overlapping	NM_203467	LRR1	leucine-rich repeat protein 1 isoform 3	+	50065414	50081390	5.21067	3.82419
ASHGA5P025994	0.016674	0.0603279	2.61435	up	noncoding	NR_049759	IFITM3	RefSeq	673	chr11	-	319672	320914	ATGAACCCCTGCTGCCTGGGCTTCATAGCATTCGCCTACTCCGTGAAGGGACAGGAAGAT	exon sense-overlapping	NM_021034	IFITM3	interferon-induced transmembrane protein 3	-	319672	320914	10.1493	8.76283
ASHGA5P044443	0.00735119	0.0427228	2.61117	up	noncoding	ENST00000564694	RP11-521I2.3	GENCODE	1142	chr8	-	101925474	101926616	GGGCCTTTAAAGCAAAACACTAACCATGAAGAGTTTTACTTTTCCCAGGAAATGAAATAT	intergenic							5.04781	3.66311
ASHGA5P019680	0.0214016	0.0695428	2.611	up	noncoding	uc003jnc.3	LOC648987	UCSC_knowngene	2276	chr5	-	43014830	43018913	TAACATCAAGGAGGAAATCAGTGGTGCTTCAGGATATTGTGAATTTGGTCTTCTGAAAGC	intergenic							4.54086	3.15625
ASHGA5P054521	0.0198257	0.06655	2.60967	up	noncoding	NR_024397	LOC728190	RefSeq	825	chr10	-	88998423	89102315	GGGTTTTAATACAGACAAATCAACTCAATCAAAGAAACCAACTCAAAGAAAGATGGGTCT	intergenic							5.72065	4.33678
ASHGA5P045613	0.0263496	0.0781252	2.60628	up	noncoding	ENST00000457102	RP11-390F4.7	GENCODE	487	chr9	+	6780332	6785929	CTGGCTCATATTGCTTCTCAAGTATCCTAATTCTCATACTGTTATTAAAAACAAACCCAC	intron sense-overlapping	NM_001146694	KDM4C	lysine-specific demethylase 4C isoform 2	+	6757640	7170920	5.28693	3.90493
ASHGA5P045613	0.0263496	0.0781252	2.60628	up	noncoding	ENST00000457102	RP11-390F4.7	GENCODE	487	chr9	+	6780332	6785929	CTGGCTCATATTGCTTCTCAAGTATCCTAATTCTCATACTGTTATTAAAAACAAACCCAC	intron sense-overlapping	NM_001146695	KDM4C	lysine-specific demethylase 4C isoform 3	+	6757640	7077264	5.28693	3.90493
ASHGA5P045613	0.0263496	0.0781252	2.60628	up	noncoding	ENST00000457102	RP11-390F4.7	GENCODE	487	chr9	+	6780332	6785929	CTGGCTCATATTGCTTCTCAAGTATCCTAATTCTCATACTGTTATTAAAAACAAACCCAC	intron sense-overlapping	NM_001146696	KDM4C	lysine-specific demethylase 4C isoform 4	+	6720862	7077264	5.28693	3.90493
ASHGA5P045613	0.0263496	0.0781252	2.60628	up	noncoding	ENST00000457102	RP11-390F4.7	GENCODE	487	chr9	+	6780332	6785929	CTGGCTCATATTGCTTCTCAAGTATCCTAATTCTCATACTGTTATTAAAAACAAACCCAC	intron sense-overlapping	NM_015061	KDM4C	lysine-specific demethylase 4C isoform 1	+	6757640	7175648	5.28693	3.90493
ASHGA5P019208	0.0146267	0.0559869	2.60463	up	noncoding	ENST00000473164	AC016629.2	GENCODE	944	chr19	+	59086822	59110942	CAGAGACAAGACGGCACCGAAAGCGAAGGAAGCTCCTGCTCCTCCTAAAGCCGAAGCCAA	intergenic							7.3082	5.92713
ASHGA5P037191	0.00579781	0.0403622	2.60462	up	noncoding	TCONS_00026160	XLOC_012574	LincRNAs identified by Cabili et al	245	chr17	-	72530813	72534060	TGTTCATCATCATCTTGTTTTAAGGGATTTGCCACATACATGCATATGGATTTCCAAAGG	intergenic							6.11504	4.73397
ASHGA5P035428	0.00277551	0.0343967	2.60433	up	noncoding	ENST00000450443	AC093818.1	GENCODE	1397	chr2	-	173368166	173421324	AGCCAGGAGGTCATTTATGTTGCCTGGATTTGCTATTGTGCTTCTAATTAAGCTATTTCA	natural antisense	NM_000210	ITGA6	integrin alpha-6 isoform b precursor	+	173292313	173371181	4.67205	3.29113
ASHGA5P035428	0.00277551	0.0343967	2.60433	up	noncoding	ENST00000450443	AC093818.1	GENCODE	1397	chr2	-	173368166	173421324	AGCCAGGAGGTCATTTATGTTGCCTGGATTTGCTATTGTGCTTCTAATTAAGCTATTTCA	natural antisense	NM_001079818	ITGA6	integrin alpha-6 isoform a precursor	+	173292313	173371181	4.67205	3.29113
ASHGA5P035428	0.00277551	0.0343967	2.60433	up	noncoding	ENST00000450443	AC093818.1	GENCODE	1397	chr2	-	173368166	173421324	AGCCAGGAGGTCATTTATGTTGCCTGGATTTGCTATTGTGCTTCTAATTAAGCTATTTCA	natural antisense	NM_002610	PDK1	pyruvate dehydrogenase kinase, isozyme 1	+	173420778	173463862	4.67205	3.29113
ASHGA5P037027	0.00483159	0.0391245	2.60344	up	noncoding	TCONS_00025471	XLOC_012288	LincRNAs identified by Cabili et al	2793	chr17	+	66179204	66185240	ATGTGTCACTGTGTAAGTTACCACTGCAATATCTTCTGTATGTTGAAAAACTGGTACTTA	intergenic							4.6556	3.27518
ASHGA5P015640	0.00325699	0.0360585	2.59732	up	noncoding	ENST00000422153	RP11-126K1.8	GENCODE	358	chr1	+	151313123	151314442	GCTACCCTATGTAGAGGACAAAGTAGGTCTTCAATAAATATTAGTTGGTTTTCTGTGATT	natural antisense	NM_000449	RFX5	DNA-binding protein RFX5	-	151313115	151319769	5.20711	3.83009
ASHGA5P015640	0.00325699	0.0360585	2.59732	up	noncoding	ENST00000422153	RP11-126K1.8	GENCODE	358	chr1	+	151313123	151314442	GCTACCCTATGTAGAGGACAAAGTAGGTCTTCAATAAATATTAGTTGGTTTTCTGTGATT	natural antisense	NM_001025603	RFX5	DNA-binding protein RFX5	-	151313115	151319769	5.20711	3.83009
ASHGA5P058016	0.0285596	0.0823803	2.59594	up	noncoding	TCONS_00025362	XLOC_012177	LincRNAs identified by Cabili et al	950	chr17	+	33648816	33652433	TTCCATCCCTTGTGGAAGAGAGCATGTAAGCAAGACAGGACCTTCAGGCCTCTGAAAAAA	intergenic							10.7812	9.40494
ASHGA5P045044	0.0101289	0.0471188	2.59199	up	noncoding	ENST00000561761	RP11-629O1.2	GENCODE	1546	chr8	+	134584413	134586104	TTAGCTTTGGCTGGGAATATCGTCTGGGCCAATAAAGAGTTTTTGGATGAAATAACAAAA	bidirectional	NM_003033	ST3GAL1	CMP-N-acetylneuraminate-beta-galactosamide- alpha-2,3-sialyltransferase 1	-	134467090	134584183	6.91176	5.5377
ASHGA5P045044	0.0101289	0.0471188	2.59199	up	noncoding	ENST00000561761	RP11-629O1.2	GENCODE	1546	chr8	+	134584413	134586104	TTAGCTTTGGCTGGGAATATCGTCTGGGCCAATAAAGAGTTTTTGGATGAAATAACAAAA	bidirectional	NM_173344	ST3GAL1	CMP-N-acetylneuraminate-beta-galactosamide- alpha-2,3-sialyltransferase 1	-	134467090	134584183	6.91176	5.5377
ASHGA5P043148	0.00615844	0.0408325	2.59145	up	noncoding	uc003uco.1	PMS2L2	UCSC_knowngene	1127	chr7	-	74942616	74981240	TCTAAGATTCGAGAGTTTGCCGACCTAACTCGGGTTGAAACTTTTGGCTTTCAGGGGAAA	intergenic							7.25165	5.87789
ASHGA5P046966	0.0195369	0.0659407	2.5881	up	noncoding	ENST00000484794	RP11-773D16.1	GENCODE	233	chr10	-	81564240	81574400	CCCTCTCGTACTTTAGTTCTGTGGATCCAAAATTTATAGCATTCTTCTACCACCACAGGG	intergenic							6.33934	4.96745
ASHGA5P025839	0.00415324	0.0379199	2.58776	up	noncoding	NR_038456	NAPA	RefSeq	1521	chr19	-	47990890	48018515	TCAGAGAGAGCCAAGCTCTAAAGCACATGTAGCCGCTGAGACCTGCTGTTTCTGCTGGGG	exon sense-overlapping	NM_003827	NAPA	alpha-soluble NSF attachment protein	-	47990890	48018515	4.85163	3.47992
ASHGA5P054125	0.032654	0.0894004	2.58717	up	noncoding	ENST00000440570	AC004383.4	GENCODE	760	chrX	-	133677366	133680662	CATTGAATGACTGTATGCTGCTTTTGATTTCCGTTAATATGGGCAACTGTCCAATTAAAA	intergenic							5.29545	3.92407
ASHGA5P038654	0.00445729	0.0386604	2.58028	up	noncoding	ENST00000456555	AC011322.1	pseudogene	883	chr3	-	196713546	196714429	TTGAAAAAGAGCAGGCTGCTGCTGAAAACACTGTGACCAAGGAGGAATTTCAGGGTGAAT								6.89919	5.53167
ASHGA5P048291	0.00980708	0.0464941	2.57839	up	noncoding	ENST00000527566	RP11-167J8.2	GENCODE	422	chr11	-	71383720	71421627	GGAAGCCCAATTCTGGCCTCTCTTTGGGGTGGGCTGAGAGTGGGAACTAGACTCTCTTTC	intergenic							5.99123	4.62476
ASHGA5P047091	0.00554805	0.0401563	2.5778	up	noncoding	ENST00000424422	RP11-324O2.4	GENCODE	551	chr10	-	114172052	114179765	GATCCTCTGTAGGGAACTTCCTTTTCTCTAATCCTAGATCTTTTCAAAAATTCTAACCAA	intronic antisense	NM_016234	ACSL5	long-chain-fatty-acid--CoA ligase 5 isoform a	+	114135955	114188138	5.35379	3.98765
ASHGA5P047091	0.00554805	0.0401563	2.5778	up	noncoding	ENST00000424422	RP11-324O2.4	GENCODE	551	chr10	-	114172052	114179765	GATCCTCTGTAGGGAACTTCCTTTTCTCTAATCCTAGATCTTTTCAAAAATTCTAACCAA	intronic antisense	NM_203379	ACSL5	long-chain-fatty-acid--CoA ligase 5 isoform b	+	114133915	114188138	5.35379	3.98765
ASHGA5P047091	0.00554805	0.0401563	2.5778	up	noncoding	ENST00000424422	RP11-324O2.4	GENCODE	551	chr10	-	114172052	114179765	GATCCTCTGTAGGGAACTTCCTTTTCTCTAATCCTAGATCTTTTCAAAAATTCTAACCAA	intronic antisense	NM_203380	ACSL5	long-chain-fatty-acid--CoA ligase 5 isoform b	+	114135022	114188138	5.35379	3.98765
ASHGA5P045231	0.0112036	0.0491399	2.56744	up	noncoding	uc004aby.3	BC019880	UCSC_knowngene	549	chr9	-	41948513	41954688	AGGACACTGTGGGCCATAAATGTGTTCTTTGGCCTGAAGAAATAAAACTTGGTGGTCCAA	intergenic							5.60987	4.24954
ASHGA5P026294	0.00426918	0.0383369	2.56709	up	noncoding	NR_015451	LINC00294	RefSeq	3322	chr11	+	33097695	33101000	TTCATCATCTCTTCTATACTAGAGCTGCAGTCTTACATTTGCTTACTTCCTGACATCCAC	intron sense-overlapping	ENST00000324357	TCP11L1	t-complex 11 (mouse)-like 1 [Source:HGNC Symbol;Acc:25655]	+	33080517	33127488	6.28261	4.92247
ASHGA5P026294	0.00426918	0.0383369	2.56709	up	noncoding	NR_015451	LINC00294	RefSeq	3322	chr11	+	33097695	33101000	TTCATCATCTCTTCTATACTAGAGCTGCAGTCTTACATTTGCTTACTTCCTGACATCCAC	intron sense-overlapping	ENST00000528962	TCP11L1	t-complex 11 (mouse)-like 1 [Source:HGNC Symbol;Acc:25655]	+	33090232	33127489	6.28261	4.92247
ASHGA5P025634	0.00485625	0.0391245	2.56476	up	noncoding	NR_023312	CIRBP	RefSeq	3312	chr19	+	1269266	1274809	CGACTCAGTGGAAGCGGGGAGAGGTGGTGAGAGATGACCCCTGTTGAGGATTTCATTGGT	exon sense-overlapping	NM_001280	CIRBP	cold-inducible RNA-binding protein	+	1269266	1273171	5.4184	4.05957
ASHGA5P017782	0.00682367	0.0419474	2.56301	up	noncoding	ENST00000445681	GS1-124K5.4	GENCODE	540	chr7	+	65958692	65960461	TCACCTGAGCCTGTGTAGGATGCCGAAGGACCTGTTCAAAGTATTTTCTGTAACTCCAAC	intergenic							5.77645	4.41861
ASHGA5P054161	0.0100695	0.0470676	2.56288	up	noncoding	ENST00000444489	RP13-507I23.1	GENCODE	2951	chrX	+	149108373	149185018	AATTCCAGAGGTAGAGCACTGCTGATTGGAGACATATTAAGTAAAATGTACTGTGGAAAT	intergenic							5.69713	4.33937
ASHGA5P032914	0.0175352	0.0617511	2.55824	up	noncoding	ENST00000584923	SNORD3A	GENCODE	699	chr17	+	19091328	19092027	AGGCGGGGGATGCTGTGTGGCACCTCCTATTGTCTCTTTTTGCGTTTTCTCCCATTCTCG	intergenic							8.23302	6.87787
ASHGA5P047920	0.00794322	0.0435209	2.55814	up	noncoding	NR_036539	LOC644656	RefSeq	1161	chr11	-	9481102	9482245	CCTAGACGCCAATGGAAAGAAAATGGGACTTTAAGCTTTGTTTGAACATATATTCTGTTA	natural antisense	ENST00000396604	ZNF143	zinc finger protein 143 [Source:HGNC Symbol;Acc:12928]	+	9482068	9549601	5.84807	4.49298
ASHGA5P047920	0.00794322	0.0435209	2.55814	up	noncoding	NR_036539	LOC644656	RefSeq	1161	chr11	-	9481102	9482245	CCTAGACGCCAATGGAAAGAAAATGGGACTTTAAGCTTTGTTTGAACATATATTCTGTTA	natural antisense	ENST00000531943	ZNF143	zinc finger protein 143 [Source:HGNC Symbol;Acc:12928]	+	9481865	9499971	5.84807	4.49298
ASHGA5P032726	0.0147616	0.0562233	2.55698	up	noncoding	ENST00000579188	RP13-20L14.4	GENCODE	680	chr17	-	80358578	80359258	GTGGGGAGCTATTTTGCTATGACTTCTGGCCAGTGTACTTTATTTTAAATTTAGTTTTGA	intron sense-overlapping	NM_024648	C17orf101	PKHD domain-containing transmembrane protein C17orf101 isoform 1	-	80347085	80376513	5.20552	3.85107
ASHGA5P032726	0.0147616	0.0562233	2.55698	up	noncoding	ENST00000579188	RP13-20L14.4	GENCODE	680	chr17	-	80358578	80359258	GTGGGGAGCTATTTTGCTATGACTTCTGGCCAGTGTACTTTATTTTAAATTTAGTTTTGA	intron sense-overlapping	NM_175902	C17orf101	PKHD domain-containing transmembrane protein C17orf101 isoform 2	-	80347085	80376513	5.20552	3.85107
ASHGA5P025785	0.0178675	0.0624785	2.55423	up	noncoding	NR_037637	GJA9-MYCBP	RefSeq	2540	chr1	-	39328161	39347298	ACTAAGAAAGCATCACTTAGGAGCTGCTACTCCAGAAAATCCAGAAATAGAGCTGCTTCG	exon sense-overlapping	NM_012333	MYCBP	C-Myc-binding protein	-	39328161	39339050	5.68942	4.33653
ASHGA5P025785	0.0178675	0.0624785	2.55423	up	noncoding	NR_037637	GJA9-MYCBP	RefSeq	2540	chr1	-	39328161	39347298	ACTAAGAAAGCATCACTTAGGAGCTGCTACTCCAGAAAATCCAGAAATAGAGCTGCTTCG	exon sense-overlapping	NM_030772	GJA9	gap junction alpha-9 protein precursor	-	39339738	39347298	5.68942	4.33653
ASHGA5P016501	0.00184998	0.0301717	2.55164	up	noncoding	uc010lgv.1	PMS2P1	UCSC_knowngene	1245	chr7	-	99918262	99933930	TTGGCTTTCGGGGGGAAGCTCTGAGCTCACTTTGTGCACTGAGGACTCCTAGAAGTACCC	natural antisense	NM_001004351	SPDYE3	speedy protein E3	+	99905324	99919819	7.44291	6.09149
ASHGA5P042386	0.0177725	0.0622833	2.54963	up	noncoding	NR_037178	LOC100294145	RefSeq	3591	chr6	+	32861952	32871535	TGTATATAGTATGGTTCTGGATGCTCTTGTATACCTCACTCTTCATTTCTCACCTAACCC	intergenic							5.59469	4.24441
ASHGA5P014966	0.00839979	0.0441336	2.54925	up	noncoding	uc010vdn.2	RRN3P2	UCSC_knowngene	2314	chr16	+	29086162	29128038	CACAGAGCCTTGCAAATAATAGCAAGATATGTACCATTGAATGTTACGTTCATAACTTAC	intergenic							6.04843	4.69835
ASHGA5P020121	0.0284397	0.0821306	2.54374	up	noncoding	ENST00000508517	AC010226.4	GENCODE	539	chr5	+	114937940	114955975	CACAGTACAGTTACACCAGCCTCCTGAGTATGACAGCAACATTCCTTCAGGGATTAAAGA	intronic antisense	NM_001164468	TMED7-TICAM2	TRAM adaptor with GOLD domain isoform 1 precursor	-	114914338	114961876	5.14952	3.80257
ASHGA5P020121	0.0284397	0.0821306	2.54374	up	noncoding	ENST00000508517	AC010226.4	GENCODE	539	chr5	+	114937940	114955975	CACAGTACAGTTACACCAGCCTCCTGAGTATGACAGCAACATTCCTTCAGGGATTAAAGA	intronic antisense	NM_001164469	TMED7-TICAM2	TRAM adaptor with GOLD domain isoform 2 precursor	-	114914338	114961876	5.14952	3.80257
ASHGA5P020121	0.0284397	0.0821306	2.54374	up	noncoding	ENST00000508517	AC010226.4	GENCODE	539	chr5	+	114937940	114955975	CACAGTACAGTTACACCAGCCTCCTGAGTATGACAGCAACATTCCTTCAGGGATTAAAGA	intronic antisense	NM_181836	TMED7	transmembrane emp24 domain-containing protein 7 precursor	-	114948904	114961876	5.14952	3.80257
ASHGA5P020121	0.0284397	0.0821306	2.54374	up	noncoding	ENST00000508517	AC010226.4	GENCODE	539	chr5	+	114937940	114955975	CACAGTACAGTTACACCAGCCTCCTGAGTATGACAGCAACATTCCTTCAGGGATTAAAGA	natural antisense	NM_021649	TICAM2	TIR domain-containing adapter molecule 2	-	114914338	114938176	5.14952	3.80257
ASHGA5P032249	0.0296557	0.0842397	2.54361	up	noncoding	ENST00000573133	RP11-28B23.1	pseudogene	187	chr17	-	18889460	18889647	AACTACTCAACTATCAATAAACCTAGGAATGGCCATCCCACTATGGGCAGGGGAAGTAGT								6.38621	5.03933
ASHGA5P026307	0.0112442	0.0491399	2.54198	up	noncoding	AA992250		LincRNAs identified by Khalil et al	552	chr5	+	65372703	65415636	GCGGAGAAGTCTGAAAGCAGGAATTGTGTATAATTCAAAACCAAATATGATTTCTGAAGT	intron sense-overlapping	ENST00000284037	ERBB2IP	erbb2 interacting protein [Source:HGNC Symbol;Acc:15842]	+	65222302	65378377	4.30595	2.95999
ASHGA5P026307	0.0112442	0.0491399	2.54198	up	noncoding	AA992250		LincRNAs identified by Khalil et al	552	chr5	+	65372703	65415636	GCGGAGAAGTCTGAAAGCAGGAATTGTGTATAATTCAAAACCAAATATGATTTCTGAAGT	intron sense-overlapping	ENST00000380935	ERBB2IP	erbb2 interacting protein [Source:HGNC Symbol;Acc:15842]	+	65222401	65376850	4.30595	2.95999
ASHGA5P026307	0.0112442	0.0491399	2.54198	up	noncoding	AA992250		LincRNAs identified by Khalil et al	552	chr5	+	65372703	65415636	GCGGAGAAGTCTGAAAGCAGGAATTGTGTATAATTCAAAACCAAATATGATTTCTGAAGT	intron sense-overlapping	ENST00000380936	ERBB2IP	erbb2 interacting protein [Source:HGNC Symbol;Acc:15842]	+	65222401	65376850	4.30595	2.95999
ASHGA5P026307	0.0112442	0.0491399	2.54198	up	noncoding	AA992250		LincRNAs identified by Khalil et al	552	chr5	+	65372703	65415636	GCGGAGAAGTCTGAAAGCAGGAATTGTGTATAATTCAAAACCAAATATGATTTCTGAAGT	intron sense-overlapping	ENST00000380938	ERBB2IP	erbb2 interacting protein [Source:HGNC Symbol;Acc:15842]	+	65222437	65374764	4.30595	2.95999
ASHGA5P026307	0.0112442	0.0491399	2.54198	up	noncoding	AA992250		LincRNAs identified by Khalil et al	552	chr5	+	65372703	65415636	GCGGAGAAGTCTGAAAGCAGGAATTGTGTATAATTCAAAACCAAATATGATTTCTGAAGT	intron sense-overlapping	ENST00000380939	ERBB2IP	erbb2 interacting protein [Source:HGNC Symbol;Acc:15842]	+	65222401	65376850	4.30595	2.95999
ASHGA5P026307	0.0112442	0.0491399	2.54198	up	noncoding	AA992250		LincRNAs identified by Khalil et al	552	chr5	+	65372703	65415636	GCGGAGAAGTCTGAAAGCAGGAATTGTGTATAATTCAAAACCAAATATGATTTCTGAAGT	intron sense-overlapping	ENST00000380943	ERBB2IP	erbb2 interacting protein [Source:HGNC Symbol;Acc:15842]	+	65222383	65376344	4.30595	2.95999
ASHGA5P026307	0.0112442	0.0491399	2.54198	up	noncoding	AA992250		LincRNAs identified by Khalil et al	552	chr5	+	65372703	65415636	GCGGAGAAGTCTGAAAGCAGGAATTGTGTATAATTCAAAACCAAATATGATTTCTGAAGT	intron sense-overlapping	ENST00000416865	ERBB2IP	erbb2 interacting protein [Source:HGNC Symbol;Acc:15842]	+	65222394	65374579	4.30595	2.95999
ASHGA5P026307	0.0112442	0.0491399	2.54198	up	noncoding	AA992250		LincRNAs identified by Khalil et al	552	chr5	+	65372703	65415636	GCGGAGAAGTCTGAAAGCAGGAATTGTGTATAATTCAAAACCAAATATGATTTCTGAAGT	intron sense-overlapping	ENST00000506030	ERBB2IP	erbb2 interacting protein [Source:HGNC Symbol;Acc:15842]	+	65222600	65374393	4.30595	2.95999
ASHGA5P026307	0.0112442	0.0491399	2.54198	up	noncoding	AA992250		LincRNAs identified by Khalil et al	552	chr5	+	65372703	65415636	GCGGAGAAGTCTGAAAGCAGGAATTGTGTATAATTCAAAACCAAATATGATTTCTGAAGT	intron sense-overlapping	ENST00000508515	ERBB2IP	erbb2 interacting protein [Source:HGNC Symbol;Acc:15842]	+	65284460	65374764	4.30595	2.95999
ASHGA5P026307	0.0112442	0.0491399	2.54198	up	noncoding	AA992250		LincRNAs identified by Khalil et al	552	chr5	+	65372703	65415636	GCGGAGAAGTCTGAAAGCAGGAATTGTGTATAATTCAAAACCAAATATGATTTCTGAAGT	intron sense-overlapping	ENST00000511297	ERBB2IP	erbb2 interacting protein [Source:HGNC Symbol;Acc:15842]	+	65222554	65374374	4.30595	2.95999
ASHGA5P026307	0.0112442	0.0491399	2.54198	up	noncoding	AA992250		LincRNAs identified by Khalil et al	552	chr5	+	65372703	65415636	GCGGAGAAGTCTGAAAGCAGGAATTGTGTATAATTCAAAACCAAATATGATTTCTGAAGT	intron sense-overlapping	NM_001006600	ERBB2IP	protein LAP2 isoform 7	+	65222381	65376851	4.30595	2.95999
ASHGA5P026307	0.0112442	0.0491399	2.54198	up	noncoding	AA992250		LincRNAs identified by Khalil et al	552	chr5	+	65372703	65415636	GCGGAGAAGTCTGAAAGCAGGAATTGTGTATAATTCAAAACCAAATATGATTTCTGAAGT	intron sense-overlapping	NM_001253697	ERBB2IP	protein LAP2 isoform 1	+	65222381	65376851	4.30595	2.95999
ASHGA5P026307	0.0112442	0.0491399	2.54198	up	noncoding	AA992250		LincRNAs identified by Khalil et al	552	chr5	+	65372703	65415636	GCGGAGAAGTCTGAAAGCAGGAATTGTGTATAATTCAAAACCAAATATGATTTCTGAAGT	intron sense-overlapping	NM_001253698	ERBB2IP	protein LAP2 isoform 4	+	65222381	65376851	4.30595	2.95999
ASHGA5P026307	0.0112442	0.0491399	2.54198	up	noncoding	AA992250		LincRNAs identified by Khalil et al	552	chr5	+	65372703	65415636	GCGGAGAAGTCTGAAAGCAGGAATTGTGTATAATTCAAAACCAAATATGATTTCTGAAGT	intron sense-overlapping	NM_001253699	ERBB2IP	protein LAP2 isoform 8	+	65222381	65376851	4.30595	2.95999
ASHGA5P026307	0.0112442	0.0491399	2.54198	up	noncoding	AA992250		LincRNAs identified by Khalil et al	552	chr5	+	65372703	65415636	GCGGAGAAGTCTGAAAGCAGGAATTGTGTATAATTCAAAACCAAATATGATTTCTGAAGT	intron sense-overlapping	NM_001253701	ERBB2IP	protein LAP2 isoform 9	+	65222381	65376851	4.30595	2.95999
ASHGA5P026307	0.0112442	0.0491399	2.54198	up	noncoding	AA992250		LincRNAs identified by Khalil et al	552	chr5	+	65372703	65415636	GCGGAGAAGTCTGAAAGCAGGAATTGTGTATAATTCAAAACCAAATATGATTTCTGAAGT	intron sense-overlapping	NM_018695	ERBB2IP	protein LAP2 isoform 2	+	65222381	65376851	4.30595	2.95999
ASHGA5P051526	0.0156796	0.0582052	2.53996	up	noncoding	uc001elb.4	AK094156	UCSC_knowngene	4848	chr1	-	144514872	144519720	ATATTACTGTGAGGTTTTAAAAGTACACAAATAACAATTGTTTTTTGTAAAAAGAAAAAA	intronic antisense	ENST00000538264	AL592284.2	Uncharacterized protein [Source:UniProtKB/TrEMBL;Acc:F5H305]	+	144339737	144521058	6.7722	5.42739
ASHGA5P035501	0.0166718	0.0603279	2.53788	up	noncoding	NR_038404	LOC100506801	RefSeq	2574	chr1	+	21619782	21626362	GAAAAAATGAGCTTTGCTGTCCATTTTTCATCTGTAAAATGGGGAAGTAGTTGCTGGATC	intronic antisense	NM_001113348	ECE1	endothelin-converting enzyme 1 isoform 4	-	21543739	21672034	4.61663	3.27301
ASHGA5P036181	0.00352714	0.0363085	2.53721	up	noncoding	ENST00000421083	ZEB2-AS1	GENCODE	453	chr2	+	145277420	145278445	TTAGAAAAGGAGGATGGAGGACGAGCACACCAAAAAGGGATAAAAAGAGAGAAAAGGGGA	natural antisense	NM_001171653	ZEB2	zinc finger E-box-binding homeobox 2 isoform 2	-	145141941	145277958	5.80745	4.4642
ASHGA5P036181	0.00352714	0.0363085	2.53721	up	noncoding	ENST00000421083	ZEB2-AS1	GENCODE	453	chr2	+	145277420	145278445	TTAGAAAAGGAGGATGGAGGACGAGCACACCAAAAAGGGATAAAAAGAGAGAAAAGGGGA	natural antisense	NM_014795	ZEB2	zinc finger E-box-binding homeobox 2 isoform 1	-	145141941	145277958	5.80745	4.4642
ASHGA5P030772	0.00209512	0.0314014	2.53453	up	noncoding	ENST00000556030	RP11-76E17.3	GENCODE	458	chr15	+	94408735	94410944	CATAACCTCAACTTCTTTATCTGTACATTGGGAACAATAATTCTTACTCCACTTGTTGTG	intergenic							5.92019	4.57848
ASHGA5P043995	0.00873656	0.0447058	2.5327	up	noncoding	ENST00000461471	OR2A9P	GENCODE	2913	chr7	+	143995111	143998024	GCTGAAGTCAGCTACACTTTTTCTATTTGAAAAACAATTTCTTGCATTTGGGATTTCAGG	intergenic							5.41265	4.07197
ASHGA5P015549	0.0337746	0.0913506	2.53259	up	noncoding	uc003uiq.4	TP53TG1	UCSC_knowngene	470	chr7	-	86954663	86974831	GCCCACGAAGGTTTAACCACCAAGGACTCTGAGAGCTGGCAGGTCTGAGTAACCCTGGTA	bidirectional	NM_001143935	CROT	peroxisomal carnitine O-octanoyltransferase isoform 1	+	86974950	87029112	7.04676	5.70614
ASHGA5P015549	0.0337746	0.0913506	2.53259	up	noncoding	uc003uiq.4	TP53TG1	UCSC_knowngene	470	chr7	-	86954663	86974831	GCCCACGAAGGTTTAACCACCAAGGACTCTGAGAGCTGGCAGGTCTGAGTAACCCTGGTA	bidirectional	NM_001243745	CROT	peroxisomal carnitine O-octanoyltransferase isoform 3	+	86974950	86989425	7.04676	5.70614
ASHGA5P015549	0.0337746	0.0913506	2.53259	up	noncoding	uc003uiq.4	TP53TG1	UCSC_knowngene	470	chr7	-	86954663	86974831	GCCCACGAAGGTTTAACCACCAAGGACTCTGAGAGCTGGCAGGTCTGAGTAACCCTGGTA	bidirectional	NM_021151	CROT	peroxisomal carnitine O-octanoyltransferase isoform 2	+	86974950	87029112	7.04676	5.70614
ASHGA5P022657	0.00848991	0.0442791	2.52914	up	noncoding	ENST00000560415	RP11-64K12.2	GENCODE	594	chr15	+	40617416	40618916	GCAAGCTTTTAATCCTTTGAACTTGTAGAACATCTGGGAGTCCACTTCCCTGTCCTCTTC	intergenic							8.10641	6.76776
ASHGA5P040060	0.00176141	0.0294773	2.52578	up	noncoding	NR_029373	LEF1-AS1	RefSeq	1695	chr4	+	109093275	109097586	AAACAAACTCAACCCCCCACCCTCCGGGGTATCAGGGAACTCGTGGGACCGTGAAAAAGT	intergenic							13.4817	12.145
ASHGA5P049942	0.0490039	0.11634	2.52469	up	noncoding	uc002kmd.2	AX721193	UCSC_knowngene	402	chr18	+	3473959	3478974	CATACCTGAGGATTATGTGGTTTGTAAACTTGGCACTTAGAAGAACCAATAAAATCATGT	intergenic							6.6939	5.35779
ASHGA5P030479	0.00739315	0.0427228	2.52305	up	noncoding	ENST00000561226	OIP5-AS1	GENCODE	775	chr15	+	41576218	41579672	CCGTTAGCTTCAGCAGAAGACGAACATGAAAAATGACTGTAAGCTATTGAAATTTAAGTT	intergenic							4.87968	3.54452
ASHGA5P040207	0.0453986	0.110652	2.52028	up	noncoding	ENST00000503611	RP11-597D13.9	GENCODE	2917	chr4	+	159091903	159124029	CTCAGACCAAAATTGAAAGTCATCTATTGTAACTATGTGTTCTTGGCATCTAAACTCTGT	natural antisense	NM_001031700	FAM198B	protein FAM198B isoform 1	-	159045731	159094202	6.42738	5.09379
ASHGA5P040207	0.0453986	0.110652	2.52028	up	noncoding	ENST00000503611	RP11-597D13.9	GENCODE	2917	chr4	+	159091903	159124029	CTCAGACCAAAATTGAAAGTCATCTATTGTAACTATGTGTTCTTGGCATCTAAACTCTGT	natural antisense	NM_001128424	FAM198B	protein FAM198B isoform 2	-	159045731	159094202	6.42738	5.09379
ASHGA5P040207	0.0453986	0.110652	2.52028	up	noncoding	ENST00000503611	RP11-597D13.9	GENCODE	2917	chr4	+	159091903	159124029	CTCAGACCAAAATTGAAAGTCATCTATTGTAACTATGTGTTCTTGGCATCTAAACTCTGT	natural antisense	NM_016613	FAM198B	protein FAM198B isoform 2	-	159045731	159093718	6.42738	5.09379
ASHGA5P015820	0.0337205	0.0913176	2.51337	up	noncoding	uc003bnq.1	RPL23AP82	UCSC_knowngene	673	chr22	+	51222224	51227600	ACACTACAGAAAGAATCCCAGACTTCTTAGAGAACCCAGTGACTTTTTGCACCTTAAATC	bidirectional	NM_001003789	RABL2B	rab-like protein 2B isoform 1	-	51205919	51222087	6.31757	4.98795
ASHGA5P015820	0.0337205	0.0913176	2.51337	up	noncoding	uc003bnq.1	RPL23AP82	UCSC_knowngene	673	chr22	+	51222224	51227600	ACACTACAGAAAGAATCCCAGACTTCTTAGAGAACCCAGTGACTTTTTGCACCTTAAATC	bidirectional	NM_001130919	RABL2B	rab-like protein 2B isoform 1	-	51205919	51222087	6.31757	4.98795
ASHGA5P015820	0.0337205	0.0913176	2.51337	up	noncoding	uc003bnq.1	RPL23AP82	UCSC_knowngene	673	chr22	+	51222224	51227600	ACACTACAGAAAGAATCCCAGACTTCTTAGAGAACCCAGTGACTTTTTGCACCTTAAATC	bidirectional	NM_001130920	RABL2B	rab-like protein 2B isoform 1	-	51205919	51222087	6.31757	4.98795
ASHGA5P015820	0.0337205	0.0913176	2.51337	up	noncoding	uc003bnq.1	RPL23AP82	UCSC_knowngene	673	chr22	+	51222224	51227600	ACACTACAGAAAGAATCCCAGACTTCTTAGAGAACCCAGTGACTTTTTGCACCTTAAATC	bidirectional	NM_001130921	RABL2B	rab-like protein 2B isoform 1	-	51205919	51222087	6.31757	4.98795
ASHGA5P015820	0.0337205	0.0913176	2.51337	up	noncoding	uc003bnq.1	RPL23AP82	UCSC_knowngene	673	chr22	+	51222224	51227600	ACACTACAGAAAGAATCCCAGACTTCTTAGAGAACCCAGTGACTTTTTGCACCTTAAATC	bidirectional	NM_001130922	RABL2B	rab-like protein 2B isoform 2	-	51205919	51222087	6.31757	4.98795
ASHGA5P015820	0.0337205	0.0913176	2.51337	up	noncoding	uc003bnq.1	RPL23AP82	UCSC_knowngene	673	chr22	+	51222224	51227600	ACACTACAGAAAGAATCCCAGACTTCTTAGAGAACCCAGTGACTTTTTGCACCTTAAATC	bidirectional	NM_001130923	RABL2B	rab-like protein 2B isoform 3	-	51205919	51222087	6.31757	4.98795
ASHGA5P015820	0.0337205	0.0913176	2.51337	up	noncoding	uc003bnq.1	RPL23AP82	UCSC_knowngene	673	chr22	+	51222224	51227600	ACACTACAGAAAGAATCCCAGACTTCTTAGAGAACCCAGTGACTTTTTGCACCTTAAATC	bidirectional	NM_007081	RABL2B	rab-like protein 2B isoform 2	-	51205919	51222087	6.31757	4.98795
ASHGA5P029183	0.043865	0.108323	2.50482	up	noncoding	ENST00000555796	CTD-2555O16.2	GENCODE	435	chr14	-	64907297	64908481	TTTAACATCAGGTCACTCTATTAAGCCATCAAAGTGTAGCTGAACTACCTAGCAACAAAG	intronic antisense	NM_005956	MTHFD1	C-1-tetrahydrofolate synthase, cytoplasmic	+	64854758	64926725	5.90585	4.58115
ASHGA5P040398	0.0383423	0.0995	2.50108	up	noncoding	ENST00000501714	CTD-2653M23.2	GENCODE	2589	chr5	-	36864526	36876759	CACCGTTCTCTATTAAGTTTGTGTAAATTAAAAAGGGGCTATTTTCGGTAAAAAGTGCAG	bidirectional	NM_015384	NIPBL	nipped-B-like protein isoform B	+	36876860	37065921	6.23531	4.91276
ASHGA5P040398	0.0383423	0.0995	2.50108	up	noncoding	ENST00000501714	CTD-2653M23.2	GENCODE	2589	chr5	-	36864526	36876759	CACCGTTCTCTATTAAGTTTGTGTAAATTAAAAAGGGGCTATTTTCGGTAAAAAGTGCAG	bidirectional	NM_133433	NIPBL	nipped-B-like protein isoform A	+	36876860	37065921	6.23531	4.91276
ASHGA5P035995	0.00493458	0.0391245	2.49916	up	noncoding	ENST00000567067	RP11-575H3.1	GENCODE	528	chr2	+	91768392	91768920	CTGTTTGAGTCTTTGGAGAAAGTGGTTTCATTGTAGGTACATGATGCACTCTTAATATTT	intergenic							6.23248	4.91104
ASHGA5P049220	1.97856e-05	0.00861233	2.4912	up	noncoding	ENST00000571523	RP11-44F14.11	GENCODE	2929	chr16	-	53524951	53527880	GGAACACCCAAAAATATTTTTAAATATATCACCTTAATAGACATTTCTTTTAGATAACTC	exon sense-overlapping	NM_001012398	AKTIP	AKT-interacting protein	-	53525191	53537170	4.325	3.00816
ASHGA5P049220	1.97856e-05	0.00861233	2.4912	up	noncoding	ENST00000571523	RP11-44F14.11	GENCODE	2929	chr16	-	53524951	53527880	GGAACACCCAAAAATATTTTTAAATATATCACCTTAATAGACATTTCTTTTAGATAACTC	exon sense-overlapping	NM_022476	AKTIP	AKT-interacting protein	-	53525191	53537170	4.325	3.00816
ASHGA5P049220	1.97856e-05	0.00861233	2.4912	up	noncoding	ENST00000571523	RP11-44F14.11	GENCODE	2929	chr16	-	53524951	53527880	GGAACACCCAAAAATATTTTTAAATATATCACCTTAATAGACATTTCTTTTAGATAACTC	natural antisense	NM_005611	RBL2	retinoblastoma-like protein 2	+	53468350	53525560	4.325	3.00816
ASHGA5P033022	0.0137816	0.0542381	2.49003	up	noncoding	ENST00000578883	RP11-848P1.9	GENCODE	477	chr17	+	29351358	29361180	CTCTGCTTAGATTGGCTTAGTTTTCTCTTTAGTCAAATCTTCAGGAACCAATTTATTACC	intergenic							6.05912	4.74296
ASHGA5P040534	0.0058147	0.0403622	2.48186	up	noncoding	ENST00000505694	CTC-459I6.1	GENCODE	535	chr5	-	80243515	80256726	GTTTGTTGTATTTTCAAAATTGTGGTATAACTGACTTACAATAAACTTCATATATTTAAA	natural antisense	NM_006909	RASGRF2	ras-specific guanine nucleotide-releasing factor 2	+	80256507	80525981	5.44091	4.12948
ASHGA5P020789	0.0068571	0.0420015	2.47297	up	noncoding	ENST00000519861	RP11-383J24.5	GENCODE	359	chr8	-	125485048	125486595	CATCTTTGAGCAAAAGGAGAGAGGCCATTATGGGGAAAAAGATCCAAAAGGACTCATCTA	bidirectional	NM_007218	RNF139	E3 ubiquitin-protein ligase RNF139	+	125487007	125500859	4.77943	3.47319
ASHGA5P032460	0.0291805	0.0834078	2.46853	up	noncoding	uc002iik.1	HEXIM2	UCSC_knowngene	2048	chr17	-	43246171	43248852	TCAACCTTTTGGAACCATTTGTTTACAAAGAGACCTGTCTACTGTCTGTCCCCCAACCTT	natural antisense	NM_144608	HEXIM2	protein HEXIM2	+	43238263	43247406	7.90288	6.59922
ASHGA5P032970	0.0147235	0.0561943	2.46642	up	noncoding	ENST00000578929	RP11-173M1.8	GENCODE	1284	chr17	+	25641668	25642952	AATTCTTTTCCATCAGAAGTAAGAGCTGTTGGCAGCAACTAATAAAATGCAACCTAGTGA	intergenic							5.96931	4.66689
ASHGA5P019715	0.00122048	0.0269538	2.46462	up	noncoding	ENST00000501652	CTC-228N24.3	GENCODE	1601	chr5	-	127301579	127418666	TGAAAATGCTGTGCAAGCGGTCTTCTCTGTCTTCTTTATGGCCAGTAAAATTCTCCAGAA	bidirectional	NM_001046	SLC12A2	solute carrier family 12 member 2 isoform 1	+	127419482	127525380	4.32383	3.02246
ASHGA5P019715	0.00122048	0.0269538	2.46462	up	noncoding	ENST00000501652	CTC-228N24.3	GENCODE	1601	chr5	-	127301579	127418666	TGAAAATGCTGTGCAAGCGGTCTTCTCTGTCTTCTTTATGGCCAGTAAAATTCTCCAGAA	bidirectional	NM_001256461	SLC12A2	solute carrier family 12 member 2 isoform 2	+	127419482	127525380	4.32383	3.02246
ASHGA5P029216	0.032433	0.0889808	2.46144	up	noncoding	ENST00000556578	RP4-647C14.3	GENCODE	777	chr14	-	73738889	73740789	AGCCCACTGAATAGCTCTTCCTAGACTCCCAAATATTTATTGACTGGATAATTAAACATC	natural antisense	NM_173462	PAPLN	papilin precursor	+	73704204	73741347	8.02517	6.72567
ASHGA5P021222	0.00174267	0.0294307	2.46057	up	noncoding	uc001iuc.3	LOC220906	UCSC_knowngene	4846	chr10	-	28808845	28821460	CCCTTTAGACAGTCGTCCTTGTCTACTCCACTACCAAATGTTGAAGTTCTTCAAGAATCA	natural antisense	ENST00000375664	WAC	WW domain containing adaptor with coiled-coil [Source:HGNC Symbol;Acc:17327]	+	28821421	28909928	5.60152	4.30253
ASHGA5P052793	0.00635487	0.0410595	2.45791	up	noncoding	ENST00000425170	SNHG5	GENCODE	489	chr6	-	86387186	86387977	TTTTTGTTAGATACACGAAAAAACTTCCAGAACATCTGGGAGAATATTTAATGGAAAATC	intergenic							7.23058	5.93314
ASHGA5P030255	0.0233153	0.0728533	2.45754	up	noncoding	ENST00000558334	RP11-617F23.1	GENCODE	1168	chr15	-	90617746	90625439	AAATAAGTTAGAATGGAATTTGTCCAGGAGTTTCCAAGTCACCCGAGAGGCTGTGCACCT	natural antisense	NM_198526	ZNF710	zinc finger protein 710	+	90544751	90625432	7.32637	6.02916
ASHGA5P032833	0.0257253	0.0768832	2.45681	up	noncoding	ENST00000578788	CTB-41I6.2	GENCODE	557	chr17	+	8870839	8880312	CCCTAATGCAAATTCTCTGTGGTTAGGAATAAAAGGAGACTTTGTCAACATGATAAATGA	intergenic							5.36854	4.07175
ASHGA5P034986	0.0051746	0.0397219	2.45357	up	noncoding	NR_028386	LOC375196	RefSeq	1068	chr2	-	39186428	39187485	TGGAAAACTCAACTTCTGTTCGACTTGTGGATCTTCACACTCAGAAACAAATTACGTTCC	natural antisense	NM_001145451	ARHGEF33	rho guanine nucleotide exchange factor 33	+	39146503	39202590	4.1807	2.88581
ASHGA5P028021	0.00491463	0.0391245	2.45295	up	noncoding	ENST00000566942	RP11-284N8.3	GENCODE	3481	chr1	-	111196181	111199662	AGTCAACAGTCTGTGATACATGCTGTACTTTTACTGATTAGCAATGCAATGTTACTGTGA	intergenic							5.41824	4.12372
ASHGA5P019569	0.00976105	0.0464515	2.4501	up	noncoding	ENST00000492937	TIPARP-AS1	GENCODE	441	chr3	-	156389650	156392167	ACCCGTTTCGAGTAATAACAGGATGGAGATGGAGTTTCATGACAAAAATGAAGGTGAATA	intronic antisense	ENST00000486483	TIPARP	TCDD-inducible poly(ADP-ribose) polymerase [Source:HGNC Symbol;Acc:23696]	+	156391023	156422928	5.10901	3.81617
ASHGA5P019569	0.00976105	0.0464515	2.4501	up	noncoding	ENST00000492937	TIPARP-AS1	GENCODE	441	chr3	-	156389650	156392167	ACCCGTTTCGAGTAATAACAGGATGGAGATGGAGTTTCATGACAAAAATGAAGGTGAATA	natural antisense	ENST00000295924	TIPARP	TCDD-inducible poly(ADP-ribose) polymerase [Source:HGNC Symbol;Acc:23696]	+	156392130	156424559	5.10901	3.81617
ASHGA5P034863	0.0088608	0.044916	2.44467	up	noncoding	NR_033997	RNF144A-AS1	RefSeq	2348	chr2	-	7052406	7058813	GCATGGAAGGTGACTACTCATGACTGCAACTTAGAGAACAAGGGTTATAATAAAAATAAA	intronic antisense	NM_014746	RNF144A	probable E3 ubiquitin-protein ligase RNF144A	+	7057522	7184309	4.37084	3.0812
ASHGA5P034716	0.0252783	0.0764506	2.44402	up	noncoding	ENST00000451217	RP1-150O5.3	GENCODE	456	chr1	-	23875629	23877406	CTTAACATACCATGTGAAGGTTGTGTTCTCTTACATTCTATAGCCCTCTGTGTTTTAATA	intergenic							5.21704	3.92778
ASHGA5P056533	0.00029533	0.0157153	2.44258	up	noncoding	TCONS_00005961	XLOC_002592	LincRNAs identified by Cabili et al	205	chr3	+	18626906	18628395	ACTGGCAAAGAAACTCCTGAGGTGACGGTTCTACCCCAATATTACTTCTTCGAAGAGCAA	intergenic							5.59499	4.30658
ASHGA5P032033	0.0362015	0.0959234	2.44239	up	noncoding	ENST00000565757	FAM157C	GENCODE	491	chr16	+	90168688	90172783	GTCCTGAAGACACCCGGTTCTCATGCTCTTCTCTGCAGCATCTGAATTGGGCATTCCTGG	intergenic							6.32771	5.03942
ASHGA5P047774	0.0117312	0.0499646	2.44236	up	noncoding	ENST00000430326	RP11-109A6.4	GENCODE	2705	chr10	+	131581116	131584811	TGTGGTTCTGACAAACCAGCTGGAGAAAAGCATTTCTGAAAAGAACTGTTTTAAGTTATT	intergenic							5.90586	4.61758
ASHGA5P054617	0.0100068	0.0469628	2.44146	up	noncoding	ENST00000528844	RP11-383C5.4	GENCODE	718	chr10	-	127395805	127408115	CCATAAAACTGATTGGACATAATTGGTGTGGGTTTATGATTTGTTTTGGAAAAACCTGAG	natural antisense	NM_001202438	C10orf137	erythroid differentiation-related factor 1 isoform 1	+	127408083	127452712	5.07338	3.78564
ASHGA5P054617	0.0100068	0.0469628	2.44146	up	noncoding	ENST00000528844	RP11-383C5.4	GENCODE	718	chr10	-	127395805	127408115	CCATAAAACTGATTGGACATAATTGGTGTGGGTTTATGATTTGTTTTGGAAAAACCTGAG	natural antisense	NM_015608	C10orf137	erythroid differentiation-related factor 1 isoform 2	+	127408083	127452712	5.07338	3.78564
ASHGA5P035213	0.00448857	0.0386604	2.43501	up	noncoding	ENST00000431411	AC108868.5	GENCODE	554	chr2	-	107138358	107154535	AAATTTAGATCTTAAGTGTGCTCTTGTTGCAGTGTCTGACATGCCCCCAAACGACTGTCC	intergenic							6.89742	5.6135
ASHGA5P049477	0.0249238	0.075849	2.43459	up	noncoding	ENST00000498671	RPL29P2	GENCODE	657	chr17	+	7657637	7658294	TTCAGAGTAGATATCTCTGTCTGCCAACGTGAGGACAGAAGGACAGGTGCCACCCACCCC	intron sense-overlapping	NM_020877	DNAH2	dynein heavy chain 2, axonemal	+	7623038	7737058	6.67477	5.39109
ASHGA5P023687	0.00450465	0.0386604	2.43423	up	noncoding	HMlincRNA1473-	HMlincRNA1473	LincRNAs identified by Khalil et al	953	chr19	-	13957369	13958322	CTTCTGAACCATTATGTAGGTAGACAAAGTCTTTCCTGGTGCTCCAGACACCAGGCAATT	intergenic							4.41138	3.12791
ASHGA5P029559	0.00762001	0.0431863	2.43374	up	noncoding	ENST00000494676	RPL13AP3	GENCODE	1473	chr14	+	56232962	56234435	GTTGTACACAGGGTATTTATAGCAGCATAGACTGGGAAGATGGGCAACAAAGGGGATACA	intergenic							8.27611	6.99294
ASHGA5P038365	0.00535639	0.0400885	2.43249	up	noncoding	ENST00000492981	RP11-271C24.2	GENCODE	303	chr3	-	113465718	113466255	CGGGGGGCCTGAATTTTTACGGATCCCTTGAATATTAATTTTCTTGGATTAAAGAAATAA	natural antisense	NM_001690	ATP6V1A	V-type proton ATPase catalytic subunit A	+	113465865	113530905	5.3711	4.08867
ASHGA5P036818	0.0445498	0.109458	2.43115	up	noncoding	TCONS_00026747	XLOC_012905	LincRNAs identified by Cabili et al	658	chr18	-	77437293	77439308	TGGATGATGAAGAATTCCCATGAACTCCTGGTTCCAACTGTAAGGACACACTACTCAGCT	intron sense-overlapping	ENST00000317008	AC068473.1	Uncharacterized protein [Source:UniProtKB/TrEMBL;Acc:E7ER84]	-	77398937	77439745	4.75193	3.47029
ASHGA5P027000	1.56246e-05	0.00758285	2.42484	up	noncoding	ENST00000447687	CD27-AS1	GENCODE	467	chr12	-	6556995	6557951	AGGAGTGATGACAAGGGTCTCCGCCAAAAGGGAAATGGAGGGGTTAAAGAAGCTGCTGGG	intronic antisense	NM_001242	CD27	CD27 antigen precursor	+	6554050	6560884	4.8346	3.55671
ASHGA5P053108	0.00938275	0.0458497	2.42365	up	noncoding	ENST00000415772	SBDSP1	pseudogene	733	chr7	+	72300068	72304585	CTGATCAAGGTCATAGAAAGTAAAGATTATGGCCAACAGTTAGAAATCGTAAGAGTCAAA								5.53287	4.25568
ASHGA5P048739	0.005798	0.0403622	2.41927	up	noncoding	uc001bqm.3	SNHG12	UCSC_knowngene	1781	chr1	-	28905049	28908366	CTAAGCTTTTTGTTCTGCAGGTTGCCCCCAAGTTTCCTGGCAGTGTGTGATACTGAGGAG	natural antisense	NM_017846	TRNAU1AP	tRNA selenocysteine 1-associated protein 1	+	28879528	28905057	7.38303	6.10846
ASHGA5P037296	0.0190783	0.0650115	2.41597	up	noncoding	NR_038894	CBR3-AS1	RefSeq	743	chr21	-	37513693	37528606	TAGTAGTTGCTTGTCCTATTGACTCAGAACCTTGAACAAATAAGCAAGTCAAATACAGAT	natural antisense	NM_001236	CBR3	carbonyl reductase [NADPH] 3	+	37507262	37518860	4.30177	3.02916
ASHGA5P029473	0.00444122	0.0386604	2.41457	up	noncoding	uc021rro.1	HP08474	UCSC_knowngene	323	chr14	+	24740431	24768057	GGGCAGAGACCCCCAGAGTGTAAAGAGGTCCTGGGACAGGCTTTGCACGTTCCACAAGAG	intronic antisense	NM_001136050	DHRS1	dehydrogenase/reductase SDR family member 1	-	24759803	24769039	6.58929	5.31752
ASHGA5P029473	0.00444122	0.0386604	2.41457	up	noncoding	uc021rro.1	HP08474	UCSC_knowngene	323	chr14	+	24740431	24768057	GGGCAGAGACCCCCAGAGTGTAAAGAGGTCCTGGGACAGGCTTTGCACGTTCCACAAGAG	intronic antisense	NM_138452	DHRS1	dehydrogenase/reductase SDR family member 1	-	24759803	24768666	6.58929	5.31752
ASHGA5P029473	0.00444122	0.0386604	2.41457	up	noncoding	uc021rro.1	HP08474	UCSC_knowngene	323	chr14	+	24740431	24768057	GGGCAGAGACCCCCAGAGTGTAAAGAGGTCCTGGGACAGGCTTTGCACGTTCCACAAGAG	intronic antisense	NM_182836	RABGGTA	geranylgeranyl transferase type-2 subunit alpha	-	24734743	24740833	6.58929	5.31752
ASHGA5P029473	0.00444122	0.0386604	2.41457	up	noncoding	uc021rro.1	HP08474	UCSC_knowngene	323	chr14	+	24740431	24768057	GGGCAGAGACCCCCAGAGTGTAAAGAGGTCCTGGGACAGGCTTTGCACGTTCCACAAGAG	natural antisense	NM_004581	RABGGTA	geranylgeranyl transferase type-2 subunit alpha	-	24734743	24740833	6.58929	5.31752
ASHGA5P050029	0.0126935	0.0521492	2.4121	up	noncoding	ENST00000580580	RP11-862L9.3	GENCODE	737	chr18	+	74693271	74696118	TAATGAGAGCCGCTGTCTAAGAGTTAAGGGTTTTCTGGGTGACGTTTAACAATAATAAAG	intronic antisense	NM_001025081	MBP	myelin basic protein isoform 1	-	74690788	74729055	4.81212	3.54182
ASHGA5P050029	0.0126935	0.0521492	2.4121	up	noncoding	ENST00000580580	RP11-862L9.3	GENCODE	737	chr18	+	74693271	74696118	TAATGAGAGCCGCTGTCTAAGAGTTAAGGGTTTTCTGGGTGACGTTTAACAATAATAAAG	intronic antisense	NM_001025090	MBP	myelin basic protein isoform 3	-	74690788	74729055	4.81212	3.54182
ASHGA5P050029	0.0126935	0.0521492	2.4121	up	noncoding	ENST00000580580	RP11-862L9.3	GENCODE	737	chr18	+	74693271	74696118	TAATGAGAGCCGCTGTCTAAGAGTTAAGGGTTTTCTGGGTGACGTTTAACAATAATAAAG	intronic antisense	NM_001025092	MBP	myelin basic protein isoform 4	-	74690788	74729055	4.81212	3.54182
ASHGA5P050029	0.0126935	0.0521492	2.4121	up	noncoding	ENST00000580580	RP11-862L9.3	GENCODE	737	chr18	+	74693271	74696118	TAATGAGAGCCGCTGTCTAAGAGTTAAGGGTTTTCTGGGTGACGTTTAACAATAATAAAG	intronic antisense	NM_001025101	MBP	Golli-MBP isoform 1	-	74690788	74844774	4.81212	3.54182
ASHGA5P050029	0.0126935	0.0521492	2.4121	up	noncoding	ENST00000580580	RP11-862L9.3	GENCODE	737	chr18	+	74693271	74696118	TAATGAGAGCCGCTGTCTAAGAGTTAAGGGTTTTCTGGGTGACGTTTAACAATAATAAAG	intronic antisense	NM_002385	MBP	myelin basic protein isoform 2	-	74690788	74729055	4.81212	3.54182
ASHGA5P051064	0.00879417	0.0448017	2.41022	up	noncoding	ENST00000447343	RP4-583P15.10	GENCODE	464	chr20	+	62376039	62377302	CTTTTCACTCAGGAAAAGAAAGAACATGTGAGTGCTTCTGAAAACACAGCAAGAGGACTT	natural antisense	NM_025224	ZBTB46	zinc finger and BTB domain-containing protein 46	-	62375020	62436856	5.89442	4.62526
ASHGA5P033444	0.0139629	0.0546244	2.40651	up	noncoding	ENST00000433131	RP11-385F5.4	GENCODE	494	chr1	-	236703393	236713580	CACCCATGTGGCAGACACTCAAAATCTGTTGTATTTGCTAAATAAATTAATATGGACAAG	exon sense-overlapping	NM_018072	HEATR1	HEAT repeat-containing protein 1	-	236712304	236767841	6.35516	5.08822
ASHGA5P033444	0.0139629	0.0546244	2.40651	up	noncoding	ENST00000433131	RP11-385F5.4	GENCODE	494	chr1	-	236703393	236713580	CACCCATGTGGCAGACACTCAAAATCTGTTGTATTTGCTAAATAAATTAATATGGACAAG	natural antisense	NM_006499	LGALS8	galectin-8 isoform a	+	236686738	236716279	6.35516	5.08822
ASHGA5P033444	0.0139629	0.0546244	2.40651	up	noncoding	ENST00000433131	RP11-385F5.4	GENCODE	494	chr1	-	236703393	236713580	CACCCATGTGGCAGACACTCAAAATCTGTTGTATTTGCTAAATAAATTAATATGGACAAG	natural antisense	NM_201543	LGALS8	galectin-8 isoform b	+	236686738	236716279	6.35516	5.08822
ASHGA5P033444	0.0139629	0.0546244	2.40651	up	noncoding	ENST00000433131	RP11-385F5.4	GENCODE	494	chr1	-	236703393	236713580	CACCCATGTGGCAGACACTCAAAATCTGTTGTATTTGCTAAATAAATTAATATGGACAAG	natural antisense	NM_201544	LGALS8	galectin-8 isoform b	+	236687026	236716279	6.35516	5.08822
ASHGA5P033444	0.0139629	0.0546244	2.40651	up	noncoding	ENST00000433131	RP11-385F5.4	GENCODE	494	chr1	-	236703393	236713580	CACCCATGTGGCAGACACTCAAAATCTGTTGTATTTGCTAAATAAATTAATATGGACAAG	natural antisense	NM_201545	LGALS8	galectin-8 isoform a	+	236681513	236716279	6.35516	5.08822
ASHGA5P039257	0.00436126	0.0384788	2.40631	up	noncoding	ENST00000453324	SDHAP2	GENCODE	1439	chr3	+	195384943	195398662	TAACACTTGCTAAATATCTGCTGGTATCTGGTGTGGCCTTTAGAGGTTTTACATTTTTAT	intron sense-overlapping	ENST00000381954	MUC20	mucin 20, cell surface associated [Source:HGNC Symbol;Acc:23282]	+	195343315	195460421	4.74883	3.48201
ASHGA5P022383	0.00798138	0.0435617	2.40599	up	noncoding	ENST00000555866	SNHG10	GENCODE	221	chr14	-	95999250	96000923	CCCAGCTTAGATTCATTGATTCCAGGTAAATCAGAGGAACAAGCAACATGAACAGAAATA	bidirectional	NM_016417	GLRX5	glutaredoxin-related protein 5, mitochondrial precursor	+	96001322	96011055	6.45572	5.18909
ASHGA5P030888	0.000339589	0.016478	2.40251	up	noncoding	ENST00000562166	CTD-3126B10.1	GENCODE	1838	chr16	-	2647881	2649719	GACCCTGAATTCCTTTGTGTTTGTTACTGGTTTTGTTCTTTGTGTGGTTGGGTGTTTTTT	natural antisense	NM_001261816	PDPK1	3-phosphoinositide-dependent protein kinase 1 isoform 3	+	2587964	2653191	5.93564	4.67109
ASHGA5P030888	0.000339589	0.016478	2.40251	up	noncoding	ENST00000562166	CTD-3126B10.1	GENCODE	1838	chr16	-	2647881	2649719	GACCCTGAATTCCTTTGTGTTTGTTACTGGTTTTGTTCTTTGTGTGGTTGGGTGTTTTTT	natural antisense	NM_002613	PDPK1	3-phosphoinositide-dependent protein kinase 1 isoform 1	+	2587964	2653191	5.93564	4.67109
ASHGA5P030888	0.000339589	0.016478	2.40251	up	noncoding	ENST00000562166	CTD-3126B10.1	GENCODE	1838	chr16	-	2647881	2649719	GACCCTGAATTCCTTTGTGTTTGTTACTGGTTTTGTTCTTTGTGTGGTTGGGTGTTTTTT	natural antisense	NM_031268	PDPK1	3-phosphoinositide-dependent protein kinase 1 isoform 2	+	2587964	2653191	5.93564	4.67109
ASHGA5P042114	0.0251399	0.0763083	2.39876	up	noncoding	ENST00000433308	RP11-497D6.4	GENCODE	619	chr6	-	147171294	147172141	GTGGATATAGATCAATTCATGCTTTTCAATTCAGTCCTCTCTCTAATAAACTGCTGTCAT	intergenic							5.13375	3.87146
ASHGA5P031527	0.00835944	0.0440999	2.39744	up	noncoding	ENST00000574285	RP11-473I1.9	GENCODE	1914	chr16	+	9198704	9200618	GACCTAGTCATCTGTATGTTAGATTCACAGAGGAATTAAAGAGATAAACATGCATGTGCT	intron sense-overlapping	NM_014117	C16orf72	UPF0472 protein C16orf72	+	9185536	9213555	7.22944	5.96795
ASHGA5P044594	0.000588115	0.0207526	2.39609	up	noncoding	ENST00000524499	CTD-3065J16.9	GENCODE	1264	chr8	-	145132904	145134168	GTATGTCTGTTTATCTCTTGCCACTTAACCTCAGCGGCTTCAAATAATAAAAATCATTCT	natural antisense	NM_019037	EXOSC4	exosome complex component RRP41	+	145133521	145135551	6.02281	4.76213
ASHGA5P014872	0.00557714	0.0401563	2.39546	up	noncoding	ENST00000414198	AC144521.1	GENCODE	737	chr3	+	18486515	18568000	ATCCTTGTAGGACTCTGGAGAAGATCAAATGGGAGCTTAGATGTGGAAGCTCTTTGGAAA	intronic antisense	ENST00000415069	SATB1	SATB homeobox 1 [Source:HGNC Symbol;Acc:10541]	-	18457514	18487080	4.77994	3.51964
ASHGA5P023522	0.00395832	0.0377672	2.39416	up	noncoding	NR_045021	C17orf76-AS1	RefSeq	928	chr17	+	16342300	16345340	CAGTGGGGGTGTTGCAAATTCGTGAAGAATCAGCATCATGTTTGGCAGCTGAGTATTGGA	natural antisense	NM_001113567	FAM211A	leucine-rich repeat-containing protein FAM211A isoform 1	-	16345318	16395505	5.64821	4.38869
ASHGA5P023522	0.00395832	0.0377672	2.39416	up	noncoding	NR_045021	C17orf76-AS1	RefSeq	928	chr17	+	16342300	16345340	CAGTGGGGGTGTTGCAAATTCGTGAAGAATCAGCATCATGTTTGGCAGCTGAGTATTGGA	natural antisense	NM_207387	FAM211A	leucine-rich repeat-containing protein FAM211A isoform 2	-	16345318	16395505	5.64821	4.38869
ASHGA5P028138	0.0235378	0.0731768	2.39349	up	noncoding	TCONS_00010083	XLOC_004540	LincRNAs identified by Cabili et al	344	chr5	+	126565032	126567810	CCGGGAAGAGAAAGCAGTTTTTGGACAACAGTTCCTTCACCTCAGCATTTTTCATGGATT	intergenic							5.65323	4.39411
ASHGA5P032372	0.0118266	0.0503242	2.3878	up	noncoding	ENST00000583409	CTB-58E17.3	GENCODE	486	chr17	-	36859732	36862514	GAAACTGCACTTAAGGGTTTCTAACGAATTACCTTTACTAGCAAGAATAAAACTGCAAGA	intronic antisense	NM_005937	MLLT6	protein AF-17	+	36861872	36886056	5.37159	4.1159
ASHGA5P031678	0.00819665	0.0439171	2.38607	up	noncoding	ENST00000570266	RP11-196G11.2	GENCODE	461	chr16	+	31054470	31061201	TAAGGAAGAGGGCAGACGGGGGAAGATTTTATAATTGTTCAAAAACATTCACTGGGATGT	intergenic							5.73744	4.4828
ASHGA5P042166	0.0426794	0.106488	2.38542	up	noncoding	NR_037593	CAHM	RefSeq	903	chr6	-	163834096	163834982	GTCGGCAGTCCCTAAATCTACGTCTGCATTTTGTTGCAAATCCTTTATAACATTCCATTA	bidirectional	NM_006775	QKI	protein quaking isoform HQK-5	+	163835674	163999628	7.62384	6.3696
ASHGA5P042166	0.0426794	0.106488	2.38542	up	noncoding	NR_037593	CAHM	RefSeq	903	chr6	-	163834096	163834982	GTCGGCAGTCCCTAAATCTACGTCTGCATTTTGTTGCAAATCCTTTATAACATTCCATTA	bidirectional	NM_206853	QKI	protein quaking isoform HQK-6	+	163835674	163999628	7.62384	6.3696
ASHGA5P042166	0.0426794	0.106488	2.38542	up	noncoding	NR_037593	CAHM	RefSeq	903	chr6	-	163834096	163834982	GTCGGCAGTCCCTAAATCTACGTCTGCATTTTGTTGCAAATCCTTTATAACATTCCATTA	bidirectional	NM_206854	QKI	protein quaking isoform HQK-7	+	163835674	163999628	7.62384	6.3696
ASHGA5P042166	0.0426794	0.106488	2.38542	up	noncoding	NR_037593	CAHM	RefSeq	903	chr6	-	163834096	163834982	GTCGGCAGTCCCTAAATCTACGTCTGCATTTTGTTGCAAATCCTTTATAACATTCCATTA	bidirectional	NM_206855	QKI	protein quaking isoform HQK-7B	+	163835674	163999628	7.62384	6.3696
ASHGA5P053707	0.00632516	0.0410595	2.38362	up	noncoding	uc010mnq.2	AK311167	UCSC_knowngene	945	chr9	+	69065545	69106241	TGTGAAGTCTACCAAGCTTGTGCTCAAGGGAACCGAGGTGAAGAGCTGGGTCCTGCAGCT	intergenic							5.64193	4.38878
ASHGA5P017955	0.00207708	0.0314014	2.38242	up	noncoding	ENST00000447577	RP4-717I23.3	GENCODE	431	chr1	-	93730207	93806029	ACATTGGCTGTTTTCCTCACATTCCTCAAGCAGGAGGGCTCTGAGAGATTTCATTTCTGT	natural antisense	NM_206886	CCDC18	coiled-coil domain-containing protein 18	+	93646280	93744287	4.84791	3.59548
ASHGA5P006991	0.00474281	0.0390427	2.38185	up	noncoding	NR_036659	ZNFX1-AS1	RefSeq	516	chr20	+	47895178	47905795	TTTGTGTGTGGTTAGAGCAGCCAGCGGGTACAGAATGGATTTTGGAAGAGGGAGTCACCA	bidirectional	NM_021035	ZNFX1	NFX1-type zinc finger-containing protein 1	-	47862438	47894756	6.76493	5.51285
ASHGA5P045134	0.0096153	0.0463232	2.38139	up	noncoding	uc003zlo.1	AK021570	UCSC_knowngene	2410	chr9	-	15163621	15166031	CCGTAGTATCACAGAATATGCTGCATTTAGATACAGGTTTAATTTGCCAGATTTTCTCAA	intergenic							6.83303	5.58123
ASHGA5P014855	0.00530877	0.0400885	2.37901	up	noncoding	ENST00000456812	GAS5	GENCODE	723	chr1	-	173833038	173836181	GAAGAAATGCAGGGTTTTTAATGACCACAACAAGCAAGCATGCAGCTTACTGCTTGAAAG	intergenic							7.64229	6.39193
ASHGA5P036314	0.00481703	0.0391245	2.37844	up	noncoding	ENST00000429796	AC067945.4	GENCODE	490	chr2	+	191895476	191897040	GACACCTTTTGTGTTATGCTCATGAATTTGTTCCAATAAATGTGTTTTCTCCCTACCCAG	natural antisense	NM_001243835	STAT4	signal transducer and activator of transcription 4	-	191894301	192016322	4.96021	3.7102
ASHGA5P036314	0.00481703	0.0391245	2.37844	up	noncoding	ENST00000429796	AC067945.4	GENCODE	490	chr2	+	191895476	191897040	GACACCTTTTGTGTTATGCTCATGAATTTGTTCCAATAAATGTGTTTTCTCCCTACCCAG	natural antisense	NM_003151	STAT4	signal transducer and activator of transcription 4	-	191894301	192015986	4.96021	3.7102
ASHGA5P027473	0.0439142	0.108329	2.37837	up	noncoding	ENST00000424517	RP4-717I23.3	GENCODE	262	chr1	-	93730232	93790207	CTGTCCTGCTGATGAAGTCTACGTTCATTCAGGGCCTGCTGTGGAAGACCAGCCCCAAAG	natural antisense	NM_206886	CCDC18	coiled-coil domain-containing protein 18	+	93646280	93744287	6.08592	4.83595
ASHGA5P000596	9.80708e-05	0.0123878	2.37769	up	noncoding	DB503534		UCR	717	chr19	+	30719460	30934950	TCTGCACACTCAAAAGCAAGTGCCAAGGAACGGGGACGCCCCCTCTTGCAATCTGTCAGT	exon sense-overlapping	ENST00000355537	ZNF536	zinc finger protein 536 [Source:HGNC Symbol;Acc:29025]	+	30863327	31048965	7.04464	5.79508
ASHGA5P000596	9.80708e-05	0.0123878	2.37769	up	noncoding	DB503534		UCR	717	chr19	+	30719460	30934950	TCTGCACACTCAAAAGCAAGTGCCAAGGAACGGGGACGCCCCCTCTTGCAATCTGTCAGT	exon sense-overlapping	NM_014717	ZNF536	zinc finger protein 536	+	30863327	31048965	7.04464	5.79508
ASHGA5P029075	0.0079528	0.0435209	2.3771	up	noncoding	NR_027263	ARHGAP5-AS1	RefSeq	1281	chr14	-	32544624	32545905	AACCAGAAGTACATTTACGGTCTGTCAGTAAAGAAAACAAAAACTGCCTGTTGGTAAAAA	natural antisense	ENST00000555814	ARHGAP5	Rho GTPase activating protein 5 [Source:HGNC Symbol;Acc:675]	+	32545319	32559986	4.94234	3.69314
ASHGA5P033322	0.00598945	0.0405793	2.37662	up	noncoding	ENST00000435469	AC005332.1	GENCODE	707	chr17	+	66097707	66111659	CACTGTAGCTCTCTACTGAAATGTTTTAAGGATCATTGTAATTCTGCTTTCCCTAATCTT	intergenic							6.41088	5.16197
ASHGA5P044635	0.0129119	0.0525422	2.37589	up	noncoding	ENST00000533615	FAM66E	GENCODE	2087	chr8	+	7812595	7848219	AGGAAAGAAGATCCAGTGAGATAGTCCACAAATGGAATGTAAATCCATAAACACTCTTAA	intronic antisense	NM_001256871	USP17L3	ubiquitin carboxyl-terminal hydrolase 17-like protein 3	-	7833914	7835507	4.47615	3.22768
ASHGA5P044635	0.0129119	0.0525422	2.37589	up	noncoding	ENST00000533615	FAM66E	GENCODE	2087	chr8	+	7812595	7848219	AGGAAAGAAGATCCAGTGAGATAGTCCACAAATGGAATGTAAATCCATAAACACTCTTAA	intronic antisense	NM_001256872	USP17L8	inactive ubiquitin carboxyl-terminal hydrolase 17-like protein 8	-	7829182	7830775	4.47615	3.22768
ASHGA5P013408	0.00609677	0.0406789	2.37165	up	noncoding	ENST00000393515	ANKRD36BP2	GENCODE	1737	chr2	+	89065418	89106116	CTAGATGAAGTGCTTGTCCTAGTACCTTAGCACATGGTTGCTGAATACATGAATGAAGAG	intergenic							5.60125	4.35536
ASHGA5P047325	0.0146833	0.0561104	2.36997	up	noncoding	uc001iup.3	LOC387647	UCSC_knowngene	3018	chr10	+	29698500	29774636	CGTGTCTTCCACTTTCTCAACACTTAGCATGCTTAATGATACTGGAAATGTATGTAATTA	natural antisense	NM_003174	SVIL	supervillin isoform 1	-	29746276	30024730	4.70287	3.458
ASHGA5P047325	0.0146833	0.0561104	2.36997	up	noncoding	uc001iup.3	LOC387647	UCSC_knowngene	3018	chr10	+	29698500	29774636	CGTGTCTTCCACTTTCTCAACACTTAGCATGCTTAATGATACTGGAAATGTATGTAATTA	natural antisense	NM_021738	SVIL	supervillin isoform 2	-	29746276	29923901	4.70287	3.458
ASHGA5P041906	0.0213911	0.0695428	2.36944	up	noncoding	ENST00000423099	RP11-505P4.6	GENCODE	370	chr6	-	74201747	74202465	GAGAGCTCTGCAAATATATGAAAGTTTCATTAACATAAGGATCCATGTCATATAAGGCAG	natural antisense	NM_001123226	MTO1	protein MTO1 homolog, mitochondrial isoform c	+	74171453	74211179	4.52358	3.27903
ASHGA5P041906	0.0213911	0.0695428	2.36944	up	noncoding	ENST00000423099	RP11-505P4.6	GENCODE	370	chr6	-	74201747	74202465	GAGAGCTCTGCAAATATATGAAAGTTTCATTAACATAAGGATCCATGTCATATAAGGCAG	natural antisense	NM_012123	MTO1	protein MTO1 homolog, mitochondrial isoform a	+	74171453	74211179	4.52358	3.27903
ASHGA5P041906	0.0213911	0.0695428	2.36944	up	noncoding	ENST00000423099	RP11-505P4.6	GENCODE	370	chr6	-	74201747	74202465	GAGAGCTCTGCAAATATATGAAAGTTTCATTAACATAAGGATCCATGTCATATAAGGCAG	natural antisense	NM_133645	MTO1	protein MTO1 homolog, mitochondrial isoform b	+	74171453	74211179	4.52358	3.27903
ASHGA5P040753	0.00823595	0.0439509	2.36919	up	noncoding	ENST00000425624	RP11-403I13.4	GENCODE	490	chr1	+	149250539	149251326	CTCAAGAGGTTAAAGGTCCCAGATCTAGAAAAAGCAGAAACTGCTGATTGTTCCTTTTTT	intergenic							4.46597	3.22157
ASHGA5P019576	0.009894	0.0466186	2.36855	up	noncoding	ENST00000493248	RP4-545C24.1	GENCODE	531	chr7	+	143892611	143947598	CCCTGGAGGGTGGAGATATTTGCTGGTCAAAGATATTAAAGTAATTGTGAAATAAAAGAA	intronic antisense	NM_001001802	OR2A42	olfactory receptor 2A1/2A42	-	143929003	143929936	6.003	4.75899
ASHGA5P019576	0.009894	0.0466186	2.36855	up	noncoding	ENST00000493248	RP4-545C24.1	GENCODE	531	chr7	+	143892611	143947598	CCCTGGAGGGTGGAGATATTTGCTGGTCAAAGATATTAAAGTAATTGTGAAATAAAAGAA	intronic antisense	NM_001005287	OR2A1	olfactory receptor 2A1/2A42	-	143929003	143929936	6.003	4.75899
ASHGA5P019576	0.009894	0.0466186	2.36855	up	noncoding	ENST00000493248	RP4-545C24.1	GENCODE	531	chr7	+	143892611	143947598	CCCTGGAGGGTGGAGATATTTGCTGGTCAAAGATATTAAAGTAATTGTGAAATAAAAGAA	natural antisense	NM_001003702	ARHGEF35	rho guanine nucleotide exchange factor 35	-	143883175	143892791	6.003	4.75899
ASHGA5P031696	0.0128617	0.0525235	2.36813	up	noncoding	ENST00000562354	KIAA0664L3	GENCODE	1907	chr16	+	31718283	31721097	AGAACTTCCTTGTGAATCCTTCCAGAAATACTCCATGTGATCTTTATCCCCCTCTTTTTT	intergenic							8.52117	7.27743
ASHGA5P026437	0.0184499	0.0638441	2.36733	up	noncoding	ENST00000529451	RP11-780O24.1	GENCODE	510	chr11	+	58645774	58660445	GTTTTGGAATAAAGAGAGGATGAATTCCTTTCTTGTGATGAATAAAGGTTGTCAATGGTC	intergenic							4.78145	3.53819
ASHGA5P040749	0.00781237	0.0433457	2.36718	up	noncoding	uc010pbe.1	BC062745	UCSC_knowngene	1072	chr1	+	149230715	149232553	TTGTAAGAATGGCATAAAGCCGGTTTCTTGCGGTGGTTATATAATTTTCAGAATGTGTAC	intergenic							4.40844	3.16527
ASHGA5P018694	0.00256836	0.033881	2.36582	up	noncoding	ENST00000456563	RP11-706O15.3	GENCODE	793	chrX	-	3772389	3785176	AGAGTCAGCACGCGGTGGCCTGGGTGAACTGTCACCCCTACAACTCAGCTTGCAACCAGC	intergenic							6.60971	5.36738
ASHGA5P028224	0.0466383	0.112432	2.36509	up	noncoding	TCONS_00017121	XLOC_007914	LincRNAs identified by Cabili et al	419	chrX	+	1780738	1781265	AAGCATTGGCAGGAAGGAAGCTTACAAATTCATCTGGGGCCACCAGCTTCCGGGGATCCG	intergenic							5.46918	4.22729
ASHGA5P022874	0.00434363	0.0384276	2.36392	up	noncoding	NR_033249	GCSH	RefSeq	1474	chr16	-	81115551	81129980	TTTTGCACAGATGAGTTTGGTGCTTTGGAAAGTGTGAAAGCTGCTAGTGAACTCTATTCT	exon sense-overlapping	NM_004483	GCSH	glycine cleavage system H protein, mitochondrial precursor	-	81115551	81129980	4.79647	3.55529
ASHGA5P045714	0.00652691	0.0412662	2.36157	up	noncoding	ENST00000509911	RP11-297B17.3	GENCODE	739	chr9	+	37002693	37008037	GTCCGGTTTCTTTGGAAAAGTTATATTCCAGTCTCAAACTATTACCTTTTGAAAGGACAT	natural antisense	NM_016734	PAX5	paired box protein Pax-5	-	36838530	37034476	5.05185	3.8121
ASHGA5P013553	0.006873	0.0420015	2.35236	up	noncoding	ENST00000394662	GBP1P1	pseudogene	1740	chr1	+	89875877	89891802	GAGAGATTTCTACAGATATAAATGAAATAGATATGGTTCCTGTCCTAATGTTGCTTGGGG								4.45454	3.22043
ASHGA5P028938	0.00789421	0.0434582	2.35204	up	noncoding	uc001vrz.1	AX748212	UCSC_knowngene	2141	chr13	+	111936127	111938268	TGACACCTCTCATCACAGGACTAACAGGACCCAAATGACACGAGGGGTTTTATTAGAATT	intron sense-overlapping	NM_001113511	ARHGEF7	rho guanine nucleotide exchange factor 7 isoform c	+	111767623	111947542	5.00582	3.7719
ASHGA5P028938	0.00789421	0.0434582	2.35204	up	noncoding	uc001vrz.1	AX748212	UCSC_knowngene	2141	chr13	+	111936127	111938268	TGACACCTCTCATCACAGGACTAACAGGACCCAAATGACACGAGGGGTTTTATTAGAATT	intron sense-overlapping	NM_001113512	ARHGEF7	rho guanine nucleotide exchange factor 7 isoform d	+	111767623	111947542	5.00582	3.7719
ASHGA5P028938	0.00789421	0.0434582	2.35204	up	noncoding	uc001vrz.1	AX748212	UCSC_knowngene	2141	chr13	+	111936127	111938268	TGACACCTCTCATCACAGGACTAACAGGACCCAAATGACACGAGGGGTTTTATTAGAATT	intron sense-overlapping	NM_001113513	ARHGEF7	rho guanine nucleotide exchange factor 7 isoform a	+	111839172	111958081	5.00582	3.7719
ASHGA5P028938	0.00789421	0.0434582	2.35204	up	noncoding	uc001vrz.1	AX748212	UCSC_knowngene	2141	chr13	+	111936127	111938268	TGACACCTCTCATCACAGGACTAACAGGACCCAAATGACACGAGGGGTTTTATTAGAATT	intron sense-overlapping	NM_003899	ARHGEF7	rho guanine nucleotide exchange factor 7 isoform a	+	111806060	111958081	5.00582	3.7719
ASHGA5P028938	0.00789421	0.0434582	2.35204	up	noncoding	uc001vrz.1	AX748212	UCSC_knowngene	2141	chr13	+	111936127	111938268	TGACACCTCTCATCACAGGACTAACAGGACCCAAATGACACGAGGGGTTTTATTAGAATT	intron sense-overlapping	NM_145735	ARHGEF7	rho guanine nucleotide exchange factor 7 isoform b	+	111767623	111947542	5.00582	3.7719
ASHGA5P035249	0.00209894	0.0314014	2.35134	up	noncoding	ENST00000457898	RP4-798A10.2	GENCODE	3245	chr1	+	16787442	16794976	GAAACTGAGCTCTTTGGCTTTTACCCACTACCATGACTCTAGTACATTTTCTCTCTCTCG	intergenic							6.31023	5.07674
ASHGA5P038748	0.0101391	0.0471188	2.35093	up	noncoding	TCONS_00016263	XLOC_007635	LincRNAs identified by Cabili et al	283	chr9	-	5308117	5311063	ATAACCTGAAAGGAAAGCATAAACATCTGGAGCAGTTCCAAAGGCATCTGGGGAGAGTCA	intergenic							6.09467	4.86143
ASHGA5P031988	0.0226387	0.0717358	2.348	up	noncoding	ENST00000569362	LA16c-444G7.2	GENCODE	465	chr16	+	88227919	88228823	CTGTGTTGTAATCGCACGCTGATCTCACAATAAATAACGTGTGCATGGAACGTGCCTTCA	intergenic							4.53029	3.29885
ASHGA5P042006	0.020421	0.0677833	2.34747	up	noncoding	uc003pyw.1	BC022047	UCSC_knowngene	2435	chr6	-	122757933	122760368	GGGGGAAATTTTTAATTACTGAAACTATTTAGGAGCTGTGGGATTACATGTCTATCTTCA	intergenic							7.89811	6.667
ASHGA5P043242	0.0172527	0.0611718	2.34609	up	noncoding	uc010lhv.1	AK091729	UCSC_knowngene	1986	chr7	-	100893615	100895601	TCCACAGGCATAGAATCCATGTGACTGTGACTTTAAGGCTGTATATTATTCCATTATATT	exon sense-overlapping	ENST00000435848	FIS1	fission 1 (mitochondrial outer membrane) homolog (S. cerevisiae) [Source:HGNC Symbol;Acc:21689]	-	100882941	100895414	5.56825	4.33799
ASHGA5P043242	0.0172527	0.0611718	2.34609	up	noncoding	uc010lhv.1	AK091729	UCSC_knowngene	1986	chr7	-	100893615	100895601	TCCACAGGCATAGAATCCATGTGACTGTGACTTTAAGGCTGTATATTATTCCATTATATT	exon sense-overlapping	ENST00000474120	FIS1	fission 1 (mitochondrial outer membrane) homolog (S. cerevisiae) [Source:HGNC Symbol;Acc:21689]	-	100882874	100895597	5.56825	4.33799
ASHGA5P039011	0.0258098	0.0770101	2.34427	up	noncoding	ENST00000499077	NUDT16P	GENCODE	2208	chr3	+	131080741	131083966	CTACTAAATGCCAGGTACTATAAAAGGTATAGAGAGCCATCCTTGCTCTCCAAGACTCCA	intergenic							5.32502	4.09588
ASHGA5P036909	0.0418197	0.104873	2.34349	up	noncoding	ENST00000418246	RP4-545L17.7	GENCODE	326	chr20	+	1146923	1160596	ATACTATGGAGGAGAAGGTGATCAAGGCCTGCATCATGCCCACAGAAATACAATAAAGCC	exon sense-overlapping	NM_006814	PSMF1	proteasome inhibitor PI31 subunit	+	1099239	1148426	5.48238	4.25373
ASHGA5P036909	0.0418197	0.104873	2.34349	up	noncoding	ENST00000418246	RP4-545L17.7	GENCODE	326	chr20	+	1146923	1160596	ATACTATGGAGGAGAAGGTGATCAAGGCCTGCATCATGCCCACAGAAATACAATAAAGCC	exon sense-overlapping	NM_178578	PSMF1	proteasome inhibitor PI31 subunit	+	1093905	1148426	5.48238	4.25373
ASHGA5P039571	0.00402738	0.0377672	2.34246	up	noncoding	NR_037596	FLJ14186	RefSeq	4818	chr4	-	120326677	120331815	GTGTTAAACAGGTTTAATGACGGTCATGGCAACTTTCTGGCACAATAAAAAATATCCCCG	natural antisense	ENST00000307499	AC110373.1	Uncharacterized protein [Source:UniProtKB/TrEMBL;Acc:F8WE51]	+	120299286	120326749	7.46759	6.23956
ASHGA5P035071	0.0143187	0.0552669	2.34242	up	noncoding	ENST00000449259	AC007386.2	GENCODE	2928	chr2	-	65128973	65132271	GGGAGACCTCTGTAATTGTGTACCATGTGCATATATTACCTATTCAGAGAATAATAAAAC	intergenic							4.68841	3.46041
ASHGA5P057996	0.00658358	0.0414667	2.34092	up	noncoding	TCONS_00024756	XLOC_012040	LincRNAs identified by Cabili et al	458	chr16	-	86081433	86082946	AATGGGGTAATAACCCCCACCCCTACCACACCAGGAAATTCTCATTCCAGTCAATATCTC	intergenic							13.8109	12.5839
ASHGA5P023057	0.0399582	0.102296	2.33787	up	noncoding	ENST00000568739	AC137934.1	GENCODE	666	chr16	+	90282279	90289086	AAGCTGCCTCGAGGAACAGTAAGAGGACCTTGTGCATGAATAATTTGTTTCCACACTGCA	intergenic							5.061	3.83581
ASHGA5P035070	0.00455647	0.0386894	2.33476	up	noncoding	ENST00000561559	RP11-568N6.1	GENCODE	1907	chr2	-	64749320	64751227	CCCATCGTTTAATGTAAAACCTTAATTTTAATTGGCTGCTTAGTAGTCAATGGAATGACC	bidirectional	NM_001002243	AFTPH	aftiphilin isoform c	+	64751438	64820138	4.94245	3.71917
ASHGA5P035070	0.00455647	0.0386894	2.33476	up	noncoding	ENST00000561559	RP11-568N6.1	GENCODE	1907	chr2	-	64749320	64751227	CCCATCGTTTAATGTAAAACCTTAATTTTAATTGGCTGCTTAGTAGTCAATGGAATGACC	bidirectional	NM_017657	AFTPH	aftiphilin isoform b	+	64751438	64820138	4.94245	3.71917
ASHGA5P035070	0.00455647	0.0386894	2.33476	up	noncoding	ENST00000561559	RP11-568N6.1	GENCODE	1907	chr2	-	64749320	64751227	CCCATCGTTTAATGTAAAACCTTAATTTTAATTGGCTGCTTAGTAGTCAATGGAATGACC	bidirectional	NM_203437	AFTPH	aftiphilin isoform a	+	64751438	64820138	4.94245	3.71917
ASHGA5P051839	0.00623562	0.0409695	2.33431	up	noncoding	ENST00000457233	SDHAP2	GENCODE	1279	chr3	+	195384932	195393553	GAGCAAAGAATACTATTGTTGCCACAGGGTAGGAATCTAATTTCTACTTTATTTCCTTTG	intron sense-overlapping	ENST00000381954	MUC20	mucin 20, cell surface associated [Source:HGNC Symbol;Acc:23282]	+	195343315	195460421	4.77598	3.55299
ASHGA5P050875	0.0206059	0.0681272	2.3329	up	noncoding	NR_028050	MTERFD2	RefSeq	2766	chr2	-	242026508	242041747	GATTTGTAATAAATTTATTGTGGTACAGTAATATGCATAAAATAAACCCATTTTAATGTG	exon sense-overlapping	NM_182501	MTERFD2	mTERF domain-containing protein 2	-	242034980	242041747	5.84865	4.62652
ASHGA5P050875	0.0206059	0.0681272	2.3329	up	noncoding	NR_028050	MTERFD2	RefSeq	2766	chr2	-	242026508	242041747	GATTTGTAATAAATTTATTGTGGTACAGTAATATGCATAAAATAAACCCATTTTAATGTG	natural antisense	NM_001080437	SNED1	sushi, nidogen and EGF-like domain-containing protein 1 precursor	+	241938254	242033643	5.84865	4.62652
ASHGA5P043741	0.0405439	0.102983	2.33063	up	noncoding	ENST00000404291	STAG3L1	GENCODE	496	chr7	+	74995622	75024657	AGCCCAGGTGCCCAGAGGACTTTCTTCCAGCTTCTGCTGTCCTTCTTTGTGGAGAGCAAG	exon sense-overlapping	ENST00000450434	TRIM73	tripartite motif containing 73 [Source:HGNC Symbol;Acc:18162]	+	75024336	75034896	6.84063	5.61991
ASHGA5P030495	0.0166684	0.0603279	2.32947	up	noncoding	ENST00000457799	RP11-367J7.2	GENCODE	414	chr1	-	157644110	157646522	ATCACATAATTTATTACAGGTGTGTTCTGGAATAGTTTCTATAAATTGATCCATTCTTGT	exon sense-overlapping	ENST00000292392	FCRL3	Fc receptor-like 3 [Source:HGNC Symbol;Acc:18506]	-	157646272	157670775	6.39491	5.17491
ASHGA5P030495	0.0166684	0.0603279	2.32947	up	noncoding	ENST00000457799	RP11-367J7.2	GENCODE	414	chr1	-	157644110	157646522	ATCACATAATTTATTACAGGTGTGTTCTGGAATAGTTTCTATAAATTGATCCATTCTTGT	exon sense-overlapping	ENST00000368184	FCRL3	Fc receptor-like 3 [Source:HGNC Symbol;Acc:18506]	-	157646271	157670647	6.39491	5.17491
ASHGA5P030495	0.0166684	0.0603279	2.32947	up	noncoding	ENST00000457799	RP11-367J7.2	GENCODE	414	chr1	-	157644110	157646522	ATCACATAATTTATTACAGGTGTGTTCTGGAATAGTTTCTATAAATTGATCCATTCTTGT	exon sense-overlapping	ENST00000368186	FCRL3	Fc receptor-like 3 [Source:HGNC Symbol;Acc:18506]	-	157646270	157670528	6.39491	5.17491
ASHGA5P049260	0.0207522	0.0683794	2.32846	up	noncoding	NR_046109	FAM96B	RefSeq	782	chr16	-	66965957	66968326	CACTTCCCACATCTGATTCGCTCCATCAATGACCCGGAGCATCCACTGACGCTAGAGGAG	exon sense-overlapping	NM_016062	FAM96B	mitotic spindle-associated MMXD complex subunit MIP18	-	66965957	66968326	5.2045	3.98512
ASHGA5P058012	0.00277457	0.0343967	2.3263	up	noncoding	TCONS_00025349	XLOC_012169	LincRNAs identified by Cabili et al	8789	chr17	+	30728987	30738705	ATTGTAAGATAATTGGTGCTGCTGTCAAGCTTGAATGAAAGGTATCTCATGGGTGGGCGC	intergenic							5.36415	4.14611
ASHGA5P020046	0.00866111	0.0443936	2.32453	up	noncoding	uc003jcs.3	LOC728613	UCSC_knowngene	1056	chr5	-	1599035	1634120	GCCTCACCGAGCCAGGCACGTGGACTCCCTTTAATCCAGTGACTGTCAGGTCGATCATAT	intergenic							5.36009	4.14315
ASHGA5P041140	0.00729173	0.042698	2.32443	up	noncoding	uc003jzw.3	SMA4	UCSC_knowngene	2015	chr5	+	70015685	70150220	ACGCAGAAAATACGTGGTTGGAGAGCTCATCTGGAATTTTGCCGATTTCATGACTAACCA	intergenic							6.58301	5.36613
ASHGA5P042433	0.00271585	0.0342583	2.3233	up	noncoding	NR_047648	FCGR2C	RefSeq	2488	chr1	+	161551128	161571010	CCACTGTTATGAAAAGATGTAGCAACATGAGAAATGCTTATGTTACAGGTTACATGAGAA	exon sense-overlapping	NM_201563	FCGR2C	low affinity immunoglobulin gamma Fc region receptor II-c precursor	+	161551128	161570032	7.90983	6.69365
ASHGA5P017817	0.013106	0.0528393	2.32207	up	noncoding	NR_027055	FAM41C	RefSeq	1779	chr1	-	803450	812182	CCCAATGAAGGAACAGCAAGAGGACCTTGTGCATGAATAATTTGTTTCCATACTACAGAG	intergenic							4.67745	3.46204
ASHGA5P015681	0.00577049	0.0403529	2.31799	up	noncoding	uc002zxl.4	GUSBP11	UCSC_knowngene	1304	chr22	-	23980674	24051428	TTGGAGAGCTCATCTGGAATTTTGCCGATTTCATGACTAACCAGTGTCAGCCCAAGACTA	intronic antisense	NM_153615	RGL4	ral-GDS-related protein precursor	+	24033047	24041363	6.24555	5.03267
ASHGA5P044953	0.00601826	0.0405793	2.31666	up	noncoding	ENST00000499653	KB-431C1.4	GENCODE	2048	chr8	+	103255836	103265561	CTTCCAGTTCTTTAAGTCAAAATTTTTATGCACATAACCATGTCAGTGTATTGCCCTTAG	natural antisense	NM_015902	UBR5	E3 ubiquitin-protein ligase UBR5	-	103264501	103424917	7.20122	5.98917
ASHGA5P033243	0.0115784	0.0497735	2.31585	up	noncoding	ENST00000576602	RP11-670E13.2	GENCODE	618	chr17	+	54946307	54946925	GCATTAGAGGAAGAATATTCTGTAGTCCTGCTTTATTCTGCCATCTTTACCTGGAAATCC	intergenic							6.15203	4.94048
ASHGA5P039529	0.000102353	0.0126994	2.31189	up	noncoding	ENST00000504082	AC004069.2	GENCODE	549	chr4	-	106058436	106061776	ATTAGCAGCTGAAGAATGACTCAGATCATCAGTAGTGAATAAGAATGATTAGGGGGAAAT	intergenic							7.89856	6.68949
ASHGA5P019765	0.00400957	0.0377672	2.30947	up	noncoding	NR_037630	LOC645513	RefSeq	1048	chr4	+	120375937	120420747	ATCTCCTAAGGTTTCACCTGCTTTGCATCAGGGCAGGGTTCCACTCCCATTGCCCAGGCT	natural antisense	NM_001083	PDE5A	cGMP-specific 3',5'-cyclic phosphodiesterase isoform 1	-	120415549	120549981	5.86581	4.65824
ASHGA5P019765	0.00400957	0.0377672	2.30947	up	noncoding	NR_037630	LOC645513	RefSeq	1048	chr4	+	120375937	120420747	ATCTCCTAAGGTTTCACCTGCTTTGCATCAGGGCAGGGTTCCACTCCCATTGCCCAGGCT	natural antisense	NM_033430	PDE5A	cGMP-specific 3',5'-cyclic phosphodiesterase isoform 2	-	120415549	120548442	5.86581	4.65824
ASHGA5P019765	0.00400957	0.0377672	2.30947	up	noncoding	NR_037630	LOC645513	RefSeq	1048	chr4	+	120375937	120420747	ATCTCCTAAGGTTTCACCTGCTTTGCATCAGGGCAGGGTTCCACTCCCATTGCCCAGGCT	natural antisense	NM_033437	PDE5A	cGMP-specific 3',5'-cyclic phosphodiesterase isoform 3	-	120415549	120549239	5.86581	4.65824
ASHGA5P031599	0.00727134	0.0426792	2.30903	up	noncoding	ENST00000564271	CTB-31N19.3	GENCODE	661	chr16	+	21638062	21638723	TTAGGTAATTGTTTTGGTAAATGGCTTGAAGTTGAACCACAGCAGTTTTGCTATTTGGAA	intron sense-overlapping	NM_001077180	METTL9	methyltransferase-like protein 9 isoform 2 precursor	+	21610855	21668792	6.21747	5.01018
ASHGA5P031599	0.00727134	0.0426792	2.30903	up	noncoding	ENST00000564271	CTB-31N19.3	GENCODE	661	chr16	+	21638062	21638723	TTAGGTAATTGTTTTGGTAAATGGCTTGAAGTTGAACCACAGCAGTTTTGCTATTTGGAA	intron sense-overlapping	NM_016025	METTL9	methyltransferase-like protein 9 isoform 1 precursor	+	21610855	21668792	6.21747	5.01018
ASHGA5P036937	0.0317365	0.0878016	2.30614	up	noncoding	TCONS_00025394	XLOC_012209	LincRNAs identified by Cabili et al	456	chr17	+	41393290	41393906	TGGAGAAAACGGTGGGGTTGGGAGGTTGTAGTACTTCAAACAAAGGTGAACGGTTTTTTA	intergenic							5.59899	4.39351
ASHGA5P028074	0.00605122	0.0406397	2.30472	up	noncoding	ENST00000564771	RP11-552M11.8	GENCODE	2023	chr1	-	111973667	111975690	AAAGGAAAAAGGCCATTGCATGGATGTGCAATAACACCTTTAGCCATTTCCTAATGATGT	intergenic							4.6516	3.44701
ASHGA5P041671	0.034885	0.0935103	2.30367	up	noncoding	ENST00000566170	RP1-223E5.4	GENCODE	1045	chr6	-	13614342	13615387	CAAATGTCTGTGTAGTTTCTGCACTTCATAACAGCTTATATGACAGTTGCTCCAGCCATT	natural antisense	NM_001193267	SIRT5	NAD-dependent protein deacylase sirtuin-5, mitochondrial isoform 3	+	13574760	13615390	4.47576	3.27182
ASHGA5P041671	0.034885	0.0935103	2.30367	up	noncoding	ENST00000566170	RP1-223E5.4	GENCODE	1045	chr6	-	13614342	13615387	CAAATGTCTGTGTAGTTTCTGCACTTCATAACAGCTTATATGACAGTTGCTCCAGCCATT	natural antisense	NM_001242827	SIRT5	NAD-dependent protein deacylase sirtuin-5, mitochondrial isoform 4	+	13574760	13615390	4.47576	3.27182
ASHGA5P041671	0.034885	0.0935103	2.30367	up	noncoding	ENST00000566170	RP1-223E5.4	GENCODE	1045	chr6	-	13614342	13615387	CAAATGTCTGTGTAGTTTCTGCACTTCATAACAGCTTATATGACAGTTGCTCCAGCCATT	natural antisense	NM_012241	SIRT5	NAD-dependent protein deacylase sirtuin-5, mitochondrial isoform 1	+	13574858	13615390	4.47576	3.27182
ASHGA5P034882	0.00963044	0.0463356	2.30252	up	noncoding	ENST00000567540	RP11-254F7.2	GENCODE	1572	chr2	-	10179218	10180790	TCCTGGGCTCACTTACTGACTTTTCAGTCTAAGGGCTTATTGCAATTGGTACATAACGAT	intergenic							5.1615	3.95829
ASHGA5P048954	0.0391134	0.100829	2.30234	up	noncoding	ENST00000544386	Z97634.5	GENCODE	661	chr16	+	436662	437323	TTTTCACAAGATGGCGCTGAAAGCAAAGAAGGAAGCTCCTGCCTCTCCTGAAGCCGAAGC	natural antisense	ENST00000427313	TMEM8A	transmembrane protein 8A [Source:HGNC Symbol;Acc:17205]	-	426805	436999	5.64946	4.44636
ASHGA5P043975	0.00245984	0.0332096	2.30118	up	noncoding	ENST00000421648	AC092214.10	GENCODE	484	chr7	+	143104925	143112923	CCCATTCCGCACATATCTCATACCAAAGTACAAATAAAACCATTCCCAATTGTTCTAATA	intronic antisense	NM_005232	EPHA1	ephrin type-A receptor 1 precursor	-	143088204	143105985	7.70793	6.50556
ASHGA5P051569	0.0190654	0.0649916	2.29846	up	noncoding	uc011bfh.2	ID2B	UCSC_knowngene	1173	chr3	-	62109158	62110392	GGAGTTAATGTCAAATGACAGGAAAGCACTGTGTGGCTGAATAATCATGACTTCTTTTTT	intronic antisense	NM_002841	PTPRG	receptor-type tyrosine-protein phosphatase gamma	+	61547242	62280573	5.65241	4.45174
ASHGA5P034030	0.00793555	0.0435209	2.29767	up	noncoding	ENST00000412115	RP11-206L10.9	GENCODE	581	chr1	+	740311	745440	GATCACTAAATATGTAGGCAATGCTGGATACTGGGCTGTTATTTACATATTTGTATCACC	intergenic							5.17251	3.97234
ASHGA5P040350	0.0339724	0.0918112	2.29734	up	noncoding	ENST00000430907	FTH1P10	pseudogene	550	chr5	-	17353983	17354533	AATCTAGCTTGGCGGAATATCTCTTTGACCAGCACACCCTGGGAGACAGTGATAATGAAA								10.2357	9.03569
ASHGA5P046308	0.0264672	0.0783731	2.29642	up	noncoding	TCONS_00001546	XLOC_000889	LincRNAs identified by Cabili et al	1296	chr1	-	84542061	84543595	GTGGATGTAATATTTTGCCCCACATACATAGAAAGTTCAATGAATAGCACTGAACCACAT	intergenic							5.10302	3.90364
ASHGA5P023133	0.00894172	0.0449818	2.29535	up	noncoding	ENST00000570712	AC012146.7	GENCODE	426	chr17	+	5017067	5017671	TTATCTTGTGGGTTATGATTCTGTATGGTTTCTTTGGTGCTGCATTAGACCTGAGCTCTG	intronic antisense	NM_014519	ZNF232	zinc finger protein 232	-	5009030	5026397	6.06638	4.86767
ASHGA5P019299	0.00555921	0.0401563	2.29373	up	noncoding	ENST00000477404	RPS27P25	GENCODE	484	chr12	+	120807242	120809491	ACAGATGAGGGGATCTCCTTCATCCTTCTCCAGAAGAGAAGAGGAAACAGAAGAAGAAAC	bidirectional	NM_002442	MSI1	RNA-binding protein Musashi homolog 1	-	120779132	120806983	7.20202	6.00432
ASHGA5P049520	0.0303198	0.0855174	2.29241	up	noncoding	NR_045024	C17orf76-AS1	RefSeq	642	chr17	+	16342300	16344525	CCAAGAGAAGGTAAGCCTTGAGCTGGCCAATGATCCCTTCAACCCCATAGTGGAATGAAT	intergenic							6.27326	5.07639
ASHGA5P056679	0.018797	0.0643586	2.28856	up	noncoding	TCONS_00007196	XLOC_003181	LincRNAs identified by Cabili et al	828	chr3	-	96335998	96337060	TAAAGTATAGGTAGAGGCGACAAACCTATCGAGCCTGGTGATAGCTGGTTGTCCAAGATA	intergenic							11.9088	10.7144
ASHGA5P018954	0.00032103	0.0160881	2.28563	up	noncoding	NR_033670	ARMCX6	RefSeq	1042	chrX	-	100870107	100872991	AGACCTCTTCAATCAGAAATGGAAACAGAGAGATTCTCCTGGAAACCCCTGCCCCATAAA	exon sense-overlapping	NM_001009584	ARMCX6	protein ARMCX6	-	100870107	100872991	7.98971	6.79712
ASHGA5P018954	0.00032103	0.0160881	2.28563	up	noncoding	NR_033670	ARMCX6	RefSeq	1042	chrX	-	100870107	100872991	AGACCTCTTCAATCAGAAATGGAAACAGAGAGATTCTCCTGGAAACCCCTGCCCCATAAA	exon sense-overlapping	NM_001184768	ARMCX6	protein ARMCX6	-	100870107	100872991	7.98971	6.79712
ASHGA5P018954	0.00032103	0.0160881	2.28563	up	noncoding	NR_033670	ARMCX6	RefSeq	1042	chrX	-	100870107	100872991	AGACCTCTTCAATCAGAAATGGAAACAGAGAGATTCTCCTGGAAACCCCTGCCCCATAAA	exon sense-overlapping	NM_019007	ARMCX6	protein ARMCX6	-	100870107	100872991	7.98971	6.79712
ASHGA5P034933	0.0171418	0.0610051	2.28121	up	noncoding	ENST00000431557	AC012074.2	GENCODE	419	chr2	-	25592041	25598714	AAACGCAATCGCACAAAGCAATTGTTCAGCACCAAATATGGGGGACAGAAGAGTGCTAAG	intergenic							7.32483	6.13503
ASHGA5P037352	0.0186162	0.0640863	2.2798	up	noncoding	ENST00000423967	AP001058.3	GENCODE	463	chr21	-	45626407	45627282	ACAGCCAGGAGACTGATTTTGTATCCAGAAGTTTCTGTTTCACAATCACTAAACTACTCA	intergenic							4.75664	3.56774
ASHGA5P048375	0.00260859	0.0341734	2.2795	up	noncoding	BU594464		LincRNAs identified by Khalil et al	812	chr4	-	122588952	122590802	AGACTGAATTTCCTTCATAGTACATGATTTTTCCTAAATATAGGAAAGATCGAAGGGGTC	exon sense-overlapping	ENST00000296511	ANXA5	annexin A5 [Source:HGNC Symbol;Acc:543]	-	122589109	122618268	5.77683	4.58811
ASHGA5P048375	0.00260859	0.0341734	2.2795	up	noncoding	BU594464		LincRNAs identified by Khalil et al	812	chr4	-	122588952	122590802	AGACTGAATTTCCTTCATAGTACATGATTTTTCCTAAATATAGGAAAGATCGAAGGGGTC	exon sense-overlapping	ENST00000501272	ANXA5	annexin A5 [Source:HGNC Symbol;Acc:543]	-	122589181	122618121	5.77683	4.58811
ASHGA5P048375	0.00260859	0.0341734	2.2795	up	noncoding	BU594464		LincRNAs identified by Khalil et al	812	chr4	-	122588952	122590802	AGACTGAATTTCCTTCATAGTACATGATTTTTCCTAAATATAGGAAAGATCGAAGGGGTC	exon sense-overlapping	ENST00000512232	ANXA5	annexin A5 [Source:HGNC Symbol;Acc:543]	-	122589170	122618121	5.77683	4.58811
ASHGA5P048375	0.00260859	0.0341734	2.2795	up	noncoding	BU594464		LincRNAs identified by Khalil et al	812	chr4	-	122588952	122590802	AGACTGAATTTCCTTCATAGTACATGATTTTTCCTAAATATAGGAAAGATCGAAGGGGTC	exon sense-overlapping	ENST00000515017	ANXA5	annexin A5 [Source:HGNC Symbol;Acc:543]	-	122589230	122618117	5.77683	4.58811
ASHGA5P048375	0.00260859	0.0341734	2.2795	up	noncoding	BU594464		LincRNAs identified by Khalil et al	812	chr4	-	122588952	122590802	AGACTGAATTTCCTTCATAGTACATGATTTTTCCTAAATATAGGAAAGATCGAAGGGGTC	exon sense-overlapping	NM_001154	ANXA5	annexin A5	-	122589151	122618147	5.77683	4.58811
ASHGA5P035593	0.000233761	0.0145673	2.27486	up	noncoding	TCONS_00015979	XLOC_007354	LincRNAs identified by Cabili et al	810	chr9	+	38949736	38968330	TCTTCACAGATCCCGGAACAAAGGACAAAGGATAGAACTAAAAGCGCCCCCCACCCGCCG	intergenic							11.4794	10.2936
ASHGA5P057519	0.0116223	0.0498651	2.27103	up	noncoding	TCONS_00018467	XLOC_008769	LincRNAs identified by Cabili et al	263	chr10	-	31109146	31110214	ACACTAGCAAGATGGAGGAATGGGGGCTCACAGCCTTATCTAATCTCCAAATGAAGAATG	intergenic							5.9955	4.81215
ASHGA5P030754	0.0266983	0.0788471	2.27023	up	noncoding	ENST00000558221	CTD-3094K11.1	GENCODE	402	chr15	+	91382953	91384608	CTATCGTCCTTCTAAAAGACACTTCAAAAAGAGGCAAAATCATGCCTTCCATACATATAT	intergenic							5.79032	4.60748
ASHGA5P016758	0.00903775	0.0451458	2.26932	up	noncoding	ENST00000433905	RP4-583P15.10	GENCODE	266	chr20	+	62376896	62377309	AATGTCCTCAAGGAAAAGAAAGAACATGTGAGTGCTTCTGAAAACACAGCAAGAGGACTT	natural antisense	NM_025224	ZBTB46	zinc finger and BTB domain-containing protein 46	-	62375020	62436856	5.58472	4.40246
ASHGA5P050584	0.0241155	0.0740982	2.26785	up	noncoding	NR_038386	LOC728537	RefSeq	1382	chr2	+	98286205	98319529	GTGAACCCGACAGACTATGGATTTATCATTTAATAAAGCATTGATTCATTTTTTCAGTCA	intergenic							6.88281	5.70148
ASHGA5P052635	0.0105379	0.0479376	2.26443	up	noncoding	ENST00000454269	HCG18	GENCODE	2430	chr6	-	30258782	30294163	CAAGGATTAGGTAAGTTCTCCCCGCGGTAGACTTCAAATACTCTTTGTCCTGCCCCTGCT	bidirectional	NM_021253	TRIM39	tripartite motif-containing protein 39 isoform 1	+	30294620	30311506	4.92817	3.74903
ASHGA5P052635	0.0105379	0.0479376	2.26443	up	noncoding	ENST00000454269	HCG18	GENCODE	2430	chr6	-	30258782	30294163	CAAGGATTAGGTAAGTTCTCCCCGCGGTAGACTTCAAATACTCTTTGTCCTGCCCCTGCT	bidirectional	NM_172016	TRIM39	tripartite motif-containing protein 39 isoform 2	+	30295007	30311506	4.92817	3.74903
ASHGA5P041983	0.00503853	0.039342	2.26431	up	noncoding	ENST00000457239	RP11-71G12.1	GENCODE	471	chr1	+	157155177	157157195	GAGTTAACATGTCCAAGATATTTGTTACTGGAAAAAACTGAACAGCAATGCATGGTATGA	intergenic							4.90746	3.72839
ASHGA5P049112	0.010275	0.0473891	2.26339	up	noncoding	uc002djl.3	RRN3P1	UCSC_knowngene	1149	chr16	-	21821749	21831731	CATATCACAGAGCCTTGCAAATAATAGCAAGATATGTACCATCATGAGTATACTTTTCCT	intergenic							6.45369	5.27521
ASHGA5P027159	0.0195185	0.0659025	2.2612	up	noncoding	ENST00000553105	RP11-996F15.2	GENCODE	2380	chr12	-	29433350	29470781	CTGGTGAAACCTAGGACTTTAAGATGATAGATGAATTTCTGATTATACTTTCCTTTCCCG	natural antisense	NM_018099	FAR2	fatty acyl-CoA reductase 2	+	29376597	29487006	5.19768	4.0206
ASHGA5P030362	0.00991966	0.0466918	2.2601	up	noncoding	uc010ayj.2	HBT8	UCSC_knowngene	4102	chr15	+	25277533	25281635	AATCCAACAACTTTAGCAGTTTGTTTACCAGTTATTGAGTACCAACTGTGTTCAACATTG	intergenic							7.04144	5.86505
ASHGA5P041852	0.0356074	0.0948399	2.25557	up	noncoding	ENST00000444038	RP1-8B1.4	GENCODE	453	chr6	-	46064829	46097328	GACATCAGTACTCTTCACCTCCAAACATTTCAGCAACATATCATTAACGATAGTCAAAAA	bidirectional	NM_014936	ENPP4	ectonucleotide pyrophosphatase/phosphodiesterase family member 4 precursor	+	46097700	46114436	7.08315	5.90966
ASHGA5P019155	0.0405052	0.102983	2.25542	up	noncoding	NR_047553	UBE2V1	RefSeq	2593	chr20	-	48697660	48732496	GCCTCCAAGATTTCAGTTTATATATTTGAACCCCCTCTGATGCTGTTTAACCCCTCTAAA	exon sense-overlapping	NM_001032288	UBE2V1	ubiquitin-conjugating enzyme E2 variant 1 isoform d	-	48697660	48729735	12.6354	11.462
ASHGA5P019155	0.0405052	0.102983	2.25542	up	noncoding	NR_047553	UBE2V1	RefSeq	2593	chr20	-	48697660	48732496	GCCTCCAAGATTTCAGTTTATATATTTGAACCCCCTCTGATGCTGTTTAACCCCTCTAAA	exon sense-overlapping	NM_001257393	UBE2V1	ubiquitin-conjugating enzyme E2 variant 1 isoform a	-	48697660	48732496	12.6354	11.462
ASHGA5P019155	0.0405052	0.102983	2.25542	up	noncoding	NR_047553	UBE2V1	RefSeq	2593	chr20	-	48697660	48732496	GCCTCCAAGATTTCAGTTTATATATTTGAACCCCCTCTGATGCTGTTTAACCCCTCTAAA	exon sense-overlapping	NM_001257394	UBE2V1	ubiquitin-conjugating enzyme E2 variant 1 isoform c	-	48697660	48732496	12.6354	11.462
ASHGA5P019155	0.0405052	0.102983	2.25542	up	noncoding	NR_047553	UBE2V1	RefSeq	2593	chr20	-	48697660	48732496	GCCTCCAAGATTTCAGTTTATATATTTGAACCCCCTCTGATGCTGTTTAACCCCTCTAAA	exon sense-overlapping	NM_001257395	UBE2V1	ubiquitin-conjugating enzyme E2 variant 1 isoform e	-	48697660	48729735	12.6354	11.462
ASHGA5P019155	0.0405052	0.102983	2.25542	up	noncoding	NR_047553	UBE2V1	RefSeq	2593	chr20	-	48697660	48732496	GCCTCCAAGATTTCAGTTTATATATTTGAACCCCCTCTGATGCTGTTTAACCCCTCTAAA	exon sense-overlapping	NM_001257396	UBE2V1	ubiquitin-conjugating enzyme E2 variant 1 isoform f	-	48697660	48729735	12.6354	11.462
ASHGA5P019155	0.0405052	0.102983	2.25542	up	noncoding	NR_047553	UBE2V1	RefSeq	2593	chr20	-	48697660	48732496	GCCTCCAAGATTTCAGTTTATATATTTGAACCCCCTCTGATGCTGTTTAACCCCTCTAAA	exon sense-overlapping	NM_001257397	UBE2V1	ubiquitin-conjugating enzyme E2 variant 1 isoform g	-	48697660	48729735	12.6354	11.462
ASHGA5P019155	0.0405052	0.102983	2.25542	up	noncoding	NR_047553	UBE2V1	RefSeq	2593	chr20	-	48697660	48732496	GCCTCCAAGATTTCAGTTTATATATTTGAACCCCCTCTGATGCTGTTTAACCCCTCTAAA	exon sense-overlapping	NM_001257398	UBE2V1	ubiquitin-conjugating enzyme E2 variant 1 isoform g	-	48697660	48729735	12.6354	11.462
ASHGA5P019155	0.0405052	0.102983	2.25542	up	noncoding	NR_047553	UBE2V1	RefSeq	2593	chr20	-	48697660	48732496	GCCTCCAAGATTTCAGTTTATATATTTGAACCCCCTCTGATGCTGTTTAACCCCTCTAAA	exon sense-overlapping	NM_001257399	UBE2V1	ubiquitin-conjugating enzyme E2 variant 1 isoform g	-	48697660	48729735	12.6354	11.462
ASHGA5P019155	0.0405052	0.102983	2.25542	up	noncoding	NR_047553	UBE2V1	RefSeq	2593	chr20	-	48697660	48732496	GCCTCCAAGATTTCAGTTTATATATTTGAACCCCCTCTGATGCTGTTTAACCCCTCTAAA	exon sense-overlapping	NM_021988	UBE2V1	ubiquitin-conjugating enzyme E2 variant 1 isoform a	-	48697660	48732496	12.6354	11.462
ASHGA5P019155	0.0405052	0.102983	2.25542	up	noncoding	NR_047553	UBE2V1	RefSeq	2593	chr20	-	48697660	48732496	GCCTCCAAGATTTCAGTTTATATATTTGAACCCCCTCTGATGCTGTTTAACCCCTCTAAA	exon sense-overlapping	NM_022442	UBE2V1	ubiquitin-conjugating enzyme E2 variant 1 isoform c	-	48697660	48732496	12.6354	11.462
ASHGA5P019155	0.0405052	0.102983	2.25542	up	noncoding	NR_047553	UBE2V1	RefSeq	2593	chr20	-	48697660	48732496	GCCTCCAAGATTTCAGTTTATATATTTGAACCCCCTCTGATGCTGTTTAACCCCTCTAAA	exon sense-overlapping	NM_199144	UBE2V1	ubiquitin-conjugating enzyme E2 variant 1 isoform a	-	48697660	48732496	12.6354	11.462
ASHGA5P019155	0.0405052	0.102983	2.25542	up	noncoding	NR_047553	UBE2V1	RefSeq	2593	chr20	-	48697660	48732496	GCCTCCAAGATTTCAGTTTATATATTTGAACCCCCTCTGATGCTGTTTAACCCCTCTAAA	exon sense-overlapping	NM_199203	TMEM189-UBE2V1	TMEM189-UBE2V1 fusion protein	-	48697660	48770335	12.6354	11.462
ASHGA5P047254	0.0391807	0.100918	2.24526	up	noncoding	uc001ikr.1	AF007147	UCSC_knowngene	2874	chr10	+	11295753	11298627	TAGATTGAAATGAAACGATGGAAAAGAAGCAGGACTTCTCCCCGTGGGTGTCTGTGATGT	intron sense-overlapping	NM_001025076	CELF2	CUGBP Elav-like family member 2 isoform 1	+	11206992	11378672	8.13082	6.96394
ASHGA5P047254	0.0391807	0.100918	2.24526	up	noncoding	uc001ikr.1	AF007147	UCSC_knowngene	2874	chr10	+	11295753	11298627	TAGATTGAAATGAAACGATGGAAAAGAAGCAGGACTTCTCCCCGTGGGTGTCTGTGATGT	intron sense-overlapping	NM_001025077	CELF2	CUGBP Elav-like family member 2 isoform 3	+	11047258	11378672	8.13082	6.96394
ASHGA5P047254	0.0391807	0.100918	2.24526	up	noncoding	uc001ikr.1	AF007147	UCSC_knowngene	2874	chr10	+	11295753	11298627	TAGATTGAAATGAAACGATGGAAAAGAAGCAGGACTTCTCCCCGTGGGTGTCTGTGATGT	intron sense-overlapping	NM_001083591	CELF2	CUGBP Elav-like family member 2 isoform 4	+	11206992	11378672	8.13082	6.96394
ASHGA5P047254	0.0391807	0.100918	2.24526	up	noncoding	uc001ikr.1	AF007147	UCSC_knowngene	2874	chr10	+	11295753	11298627	TAGATTGAAATGAAACGATGGAAAAGAAGCAGGACTTCTCCCCGTGGGTGTCTGTGATGT	intron sense-overlapping	NM_006561	CELF2	CUGBP Elav-like family member 2 isoform 2	+	11059892	11378672	8.13082	6.96394
ASHGA5P023256	0.0100129	0.0469628	2.24427	up	noncoding	ENST00000576093	LINC00085	GENCODE	1894	chr19	+	52196592	52208443	TTTCTTAACGTCCTCGGGGCCCTCGCATCAGCGAGTGCGACAGTGTTGGCGTGGTGAGTT	intergenic							5.31992	4.15367
ASHGA5P046821	0.00904238	0.0451458	2.24151	up	noncoding	NR_001545	TTTY15	RefSeq	5262	chrY	+	14774297	14804153	GTAGTTGTCTAGACTCTAGTGAAAATAATTACAGATAATCTCAGTTCATCAACGAATCGG	intergenic							6.61487	5.4504
ASHGA5P027793	0.0137555	0.0542048	2.24119	up	noncoding	ENST00000535078	ABC12-49244600F4.3	GENCODE	325	chr12	+	7273153	7275097	TTAGCTTGGGTCTTAAAACCACCATGGTAAGAAGTGTCAACCTTTGGGGGAAAAATAAAA	intergenic							7.31935	6.15509
ASHGA5P043856	0.0132166	0.053033	2.24	up	noncoding	uc003vhq.1	BD495725	UCSC_knowngene	1949	chr7	+	115893169	115895118	GAGAAGGTTATCTAGTTCAGGGCATTGATCTGCTTAGATCTTTTCATCTTAAAGAGAGAA	intron sense-overlapping	NM_015641	TES	testin isoform 1	+	115850546	115898837	5.13887	3.97536
ASHGA5P043856	0.0132166	0.053033	2.24	up	noncoding	uc003vhq.1	BD495725	UCSC_knowngene	1949	chr7	+	115893169	115895118	GAGAAGGTTATCTAGTTCAGGGCATTGATCTGCTTAGATCTTTTCATCTTAAAGAGAGAA	intron sense-overlapping	NM_152829	TES	testin isoform 2	+	115863004	115898837	5.13887	3.97536
ASHGA5P030151	0.0127635	0.0523344	2.23745	up	noncoding	ENST00000565737	CTD-3154N5.1	GENCODE	498	chr15	-	74905534	74907937	TTTTGTGACTTTCACACCTTTCAGAAACTTGGAGAAAGATCTGCCCCCAGGTGAGGTTTG	intronic antisense	NM_003992	CLK3	dual specificity protein kinase CLK3 isoform b	+	74900712	74922542	5.82336	4.6615
ASHGA5P030151	0.0127635	0.0523344	2.23745	up	noncoding	ENST00000565737	CTD-3154N5.1	GENCODE	498	chr15	-	74905534	74907937	TTTTGTGACTTTCACACCTTTCAGAAACTTGGAGAAAGATCTGCCCCCAGGTGAGGTTTG	natural antisense	NM_001130028	CLK3	dual specificity protein kinase CLK3 isoform a	+	74907334	74922542	5.82336	4.6615
ASHGA5P043481	0.0130272	0.0528015	2.23714	up	noncoding	ENST00000441932	RPS10P7	GENCODE	2329	chr1	+	201487830	201499602	GTCTCTCATGGAAAGAAAAGTATTAAACCCATGATGATTACATCTTAGTCTAAGGGGAAT	intergenic							6.85465	5.693
ASHGA5P029821	0.0150661	0.0568198	2.23692	up	noncoding	TCONS_00016208	XLOC_007598	LincRNAs identified by Cabili et al	1043	chr9	+	137371780	137375298	TCTTTGTGAGGTAGGGTGGAACTTGCATCCTGAACATTAAAGTTTACATGCCAAGGAGGG	intergenic							4.31083	3.14931
ASHGA5P050525	0.00844385	0.0441638	2.23361	up	noncoding	ENST00000439192	DGUOK-AS1	GENCODE	563	chr2	-	74185096	74208560	AACAGATCTAAATTCAACATGACTTTTCAAAGAAACTGCATGTAAACTGCATTTAAAAAA	natural antisense	NM_080916	DGUOK	deoxyguanosine kinase, mitochondrial isoform a	+	74153952	74186088	5.15689	3.99751
ASHGA5P050525	0.00844385	0.0441638	2.23361	up	noncoding	ENST00000439192	DGUOK-AS1	GENCODE	563	chr2	-	74185096	74208560	AACAGATCTAAATTCAACATGACTTTTCAAAGAAACTGCATGTAAACTGCATTTAAAAAA	natural antisense	NM_080918	DGUOK	deoxyguanosine kinase, mitochondrial isoform b	+	74153952	74186088	5.15689	3.99751
ASHGA5P015836	0.00325271	0.0360585	2.23171	up	noncoding	NR_027286	FLVCR1-AS1	RefSeq	688	chr1	-	213029945	213031480	CCCACTAAAGAGGAATAACGCCAGAAAGTGTTCCAGTACAACCAGAGAAAGAGAGTCCAT	bidirectional	NM_014053	FLVCR1	feline leukemia virus subgroup C receptor-related protein 1	+	213031596	213072705	4.52277	3.36462
ASHGA5P047784	0.00933463	0.0457225	2.22767	up	noncoding	ENST00000428814	RP11-432J24.2	GENCODE	297	chr10	+	134232586	134234457	GGTTTTCTGTTTCTTTGATTATAAAATAACCCCTGTTGGTGGGGGGAAAAAATTAGCAAA	intergenic							7.27761	6.12208
ASHGA5P046982	0.0134372	0.0534958	2.22721	up	noncoding	ENST00000447424	RP11-322M19.1	GENCODE	571	chr10	-	88998423	89096631	TAATCGACTAAGTAAAAAACAGATTTCTTGAAGAATTAATAAAGAACTTTTGTTTTGGAA	intergenic							4.85488	3.69964
ASHGA5P053309	0.000313605	0.015929	2.22703	up	noncoding	ENST00000467614	RP11-286H14.4	pseudogene	1200	chr7	+	128766571	128767771	GCGGTCCGAGGTGAAAGAAGCGGATTTTGCCTGCTAGTTGTGTAAAACCCTGGGGCTGAA								5.78339	4.62827
ASHGA5P048079	0.00541244	0.0400885	2.22543	up	noncoding	AA420706		LincRNAs identified by Khalil et al	340	chr3	-	152716537	152716869	AGGAGATTATTGCTAAACCTCTGTTATTTGTGTTGCTATCACATTCTGCCCCCAGCTGGG	intergenic							5.85878	4.7047
ASHGA5P033947	0.00858876	0.0443672	2.22282	up	noncoding	ENST00000565797	CTB-31O20.2	GENCODE	1288	chr19	-	1874880	1876168	CATCTATGTTACGTTGATCATTGTTACCACTGACAGTCGTTTCGAGATTGGAAAATATGT	intergenic							7.03743	5.88504
ASHGA5P043693	0.00663911	0.0416457	2.22222	up	noncoding	uc003tsz.3	AK123141	UCSC_knowngene	3644	chr7	+	63813368	63817012	AGAATTAATATTACCCAACTTGTCCAATAAAATGTTTTTAAGTTGCCTATTTTTAAAAAA	intergenic							5.4268	4.27479
ASHGA5P019025	0.00452735	0.0386604	2.22186	up	noncoding	ENST00000489077	RP4-545C24.1	GENCODE	423	chr7	+	143904784	143940928	AGTTAGCTGGTTCCAAGTGACCCTCCAAGGGGAAGAGTGCTGGATTCAGAGCCCACCTCA	intronic antisense	NM_001001802	OR2A42	olfactory receptor 2A1/2A42	-	143929003	143929936	5.5767	4.42493
ASHGA5P019025	0.00452735	0.0386604	2.22186	up	noncoding	ENST00000489077	RP4-545C24.1	GENCODE	423	chr7	+	143904784	143940928	AGTTAGCTGGTTCCAAGTGACCCTCCAAGGGGAAGAGTGCTGGATTCAGAGCCCACCTCA	intronic antisense	NM_001005287	OR2A1	olfactory receptor 2A1/2A42	-	143929003	143929936	5.5767	4.42493
ASHGA5P036772	0.0466975	0.112516	2.22053	up	noncoding	ENST00000419993	RP11-109P14.10	GENCODE	481	chr1	+	38326368	38327252	TTGCTGGCCCAGAAAATCCCACTTGTTTCACCGAACACTCATTTTTTCAGTGATTTTACA	natural antisense	NM_005540	INPP5B	type II inositol 1,4,5-trisphosphate 5-phosphatase precursor	-	38326368	38412729	5.91767	4.76677
ASHGA5P033070	0.0233907	0.0730395	2.21912	up	noncoding	NR_038847	LOC100505576	RefSeq	3708	chr17	+	37081420	37085637	ATTGGGTACAATGTAAGGAGAGAGGATTACCCATCTCTTCAGTTACTTGTAAAATATGAT	intergenic							6.9445	5.79452
ASHGA5P056681	0.0237031	0.0734924	2.21806	up	noncoding	TCONS_00007198	XLOC_003181	LincRNAs identified by Cabili et al	273	chr3	-	96336528	96337035	TAAGAACAGCTAAAAGAGCACACCCCAGCCACCAATTAAGAAAGCGTTCAAGCTCAACAC	intergenic							11.0875	9.9382
ASHGA5P028066	0.00650737	0.0412662	2.21697	up	noncoding	ENST00000552576	RP11-644F5.11	GENCODE	1274	chr12	+	56122887	56124467	GATGTGGTGAGATGGGCTGAAGGTGGTCTGAAGATCAAGATTGAGAGACTAGATACATAA	natural antisense	NM_001257389	CD63	CD63 antigen isoform A	-	56119226	56123457	5.21925	4.07066
ASHGA5P028066	0.00650737	0.0412662	2.21697	up	noncoding	ENST00000552576	RP11-644F5.11	GENCODE	1274	chr12	+	56122887	56124467	GATGTGGTGAGATGGGCTGAAGGTGGTCTGAAGATCAAGATTGAGAGACTAGATACATAA	natural antisense	NM_001780	CD63	CD63 antigen isoform A	-	56119226	56122922	5.21925	4.07066
ASHGA5P030991	0.0156363	0.0580703	2.21519	up	noncoding	ENST00000552753	MIR3179-3	GENCODE	543	chr16	-	18505165	18505708	TGCAGGGGTTAGCAAACTATGGCCCACTGTTCTTGTTTTATAAATAAAGTGTTATGAGCA	intergenic							5.92757	4.78014
ASHGA5P036283	0.00841604	0.0441435	2.21441	up	noncoding	ENST00000582038	RP11-88L24.4	GENCODE	1955	chr2	+	179641652	179644689	GACCTTCTAATAGCTGTCTAACCCCGAGCTCATCACTTGAAAATGAAAATATCAAATAAA	natural antisense	NM_001256850	TTN	titin isoform 1	-	179390716	179672150	6.22661	5.07969
ASHGA5P036283	0.00841604	0.0441435	2.21441	up	noncoding	ENST00000582038	RP11-88L24.4	GENCODE	1955	chr2	+	179641652	179644689	GACCTTCTAATAGCTGTCTAACCCCGAGCTCATCACTTGAAAATGAAAATATCAAATAAA	natural antisense	NM_001267550	TTN	titin isoform IC	-	179390716	179672150	6.22661	5.07969
ASHGA5P036283	0.00841604	0.0441435	2.21441	up	noncoding	ENST00000582038	RP11-88L24.4	GENCODE	1955	chr2	+	179641652	179644689	GACCTTCTAATAGCTGTCTAACCCCGAGCTCATCACTTGAAAATGAAAATATCAAATAAA	natural antisense	NM_003319	TTN	titin isoform N2-B	-	179390717	179672150	6.22661	5.07969
ASHGA5P036283	0.00841604	0.0441435	2.21441	up	noncoding	ENST00000582038	RP11-88L24.4	GENCODE	1955	chr2	+	179641652	179644689	GACCTTCTAATAGCTGTCTAACCCCGAGCTCATCACTTGAAAATGAAAATATCAAATAAA	natural antisense	NM_133378	TTN	titin isoform N2-A	-	179390717	179672150	6.22661	5.07969
ASHGA5P036283	0.00841604	0.0441435	2.21441	up	noncoding	ENST00000582038	RP11-88L24.4	GENCODE	1955	chr2	+	179641652	179644689	GACCTTCTAATAGCTGTCTAACCCCGAGCTCATCACTTGAAAATGAAAATATCAAATAAA	natural antisense	NM_133379	TTN	titin isoform novex-3	-	179610046	179672150	6.22661	5.07969
ASHGA5P036283	0.00841604	0.0441435	2.21441	up	noncoding	ENST00000582038	RP11-88L24.4	GENCODE	1955	chr2	+	179641652	179644689	GACCTTCTAATAGCTGTCTAACCCCGAGCTCATCACTTGAAAATGAAAATATCAAATAAA	natural antisense	NM_133432	TTN	titin isoform novex-1	-	179390717	179672150	6.22661	5.07969
ASHGA5P036283	0.00841604	0.0441435	2.21441	up	noncoding	ENST00000582038	RP11-88L24.4	GENCODE	1955	chr2	+	179641652	179644689	GACCTTCTAATAGCTGTCTAACCCCGAGCTCATCACTTGAAAATGAAAATATCAAATAAA	natural antisense	NM_133437	TTN	titin isoform novex-2	-	179390717	179672150	6.22661	5.07969
ASHGA5P000067	0.00811048	0.0437937	2.21312	up	noncoding	AL080072		NRED	1322	chr1	+	92654807	92656269	TTGCATTCTAACAGGTTATGATGAATGGAAAGCTGATGGTTCCTGGTTGGAAAAAAGATA	intergenic							4.44381	3.29773
ASHGA5P030910	0.0105482	0.0479376	2.21237	up	noncoding	ENST00000570843	RP11-473M20.16	GENCODE	748	chr16	-	3206736	3207484	AAGAAAACGTGGAAGTGACTCCGTATACCTTGCAAATCGGGAATTGTTGGTCAGGCAAAC	intergenic							5.42556	4.27996
ASHGA5P003749	0.0167854	0.0604403	2.21124	up	noncoding	ENST00000414507	PMS2P4	GENCODE	455	chr7	-	66760604	66767406	AAGAAGAAAACTTTGAAGGCTTAACGATGTCACCATTTCTACCTGCCACGCATCGGCGAA	intergenic							4.51139	3.36654
ASHGA5P000059	0.0379294	0.0989104	2.21075	up	noncoding	AK123196		RNAdb	1909	chr2	+	46896008	46897917	GGTGCAGTCTAACCCAATGCATATGGAACTGTTTGGACAGAATAAAATAGTTTAAATGGC	intergenic							4.92293	3.7784
ASHGA5P036456	0.00778708	0.0433457	2.20934	up	noncoding	uc002vja.1	AX748340	UCSC_knowngene	2359	chr2	+	219684883	219687242	CCACAAGTTCAGGTCAAATGACTGCAGCATTTTGAGTGAAACCAATAAAATCTAAGTTCA	natural antisense	NM_017431	PRKAG3	5'-AMP-activated protein kinase subunit gamma-3	-	219687105	219696512	5.6916	4.54798
ASHGA5P022508	0.00428577	0.0383369	2.20864	up	noncoding	ENST00000558174	RP11-752G15.6	GENCODE	725	chr15	+	83419334	83425958	TCTAAAAGAGACTTATCAGCAGGTTGCAGGTGAACATGGCCTTGAGGTAAATCTGTCCCT	natural antisense	ENST00000334574	FSD2	fibronectin type III and SPRY domain containing 2 [Source:HGNC Symbol;Acc:18024]	-	83424113	83474821	6.09526	4.9521
ASHGA5P033163	0.00953398	0.0461336	2.2078	up	noncoding	TCONS_00028218	XLOC_013564	LincRNAs identified by Cabili et al	232	chr20	+	49752747	49759296	TTTGTGAAAGCTGCATGATGTGAAATTAAACTCGGGCAGAGGTGCTGTGGGTGATGATGT	intergenic							4.76113	3.61852
ASHGA5P048143	0.0143967	0.0553443	2.20618	up	noncoding	TCONS_00014447	XLOC_006664	LincRNAs identified by Cabili et al	267	chr7	-	155061985	155065006	GTCATAAAAACAACACATTCCAAATGCACTGTCATGGGCTTGGAAGGAAAATAATAAAGA	intergenic							4.60572	3.46417
ASHGA5P014500	0.0111417	0.0490627	2.20278	up	noncoding	NR_024373	LOC541471	RefSeq	557	chr2	-	112186885	112252692	CCTCTCCCTGAATAACTGGGAGATGAAACAGGAAGCTCTATGACACACTTGATCGAATAT	intergenic							6.06359	4.92426
ASHGA5P017470	0.0150896	0.0568621	2.20192	up	noncoding	ENST00000442049	RP11-403I13.4	GENCODE	454	chr1	+	149239893	149250552	AGAGATCCTTGTCAGAAAACTTGCCACAGAATCAACCCCAATGCTCACTAACAAACTGAG	intergenic							5.78324	4.64448
ASHGA5P055144	0.00918256	0.0455473	2.2013	up	noncoding	ENST00000527511	RP11-356J5.12	GENCODE	597	chr11	+	112163295	112164839	CAGCCAAGATACAAACATTGGACGTATTTGTACAGCAGCTAAAGGTACTATAATAATACA	intergenic							5.43529	4.29693
ASHGA5P020633	0.000106699	0.0126994	2.19949	up	noncoding	NR_033449	TCF7	RefSeq	3074	chr5	+	133451349	133483920	TCCTTGACCAGCACAAGGCCAATCAGCCCCCCCACGGTGTCCCCCAACTCTCTCTCTACG	exon sense-overlapping	NM_001134851	TCF7	transcription factor 7 isoform 3	+	133451297	133483920	12.6968	11.5596
ASHGA5P020633	0.000106699	0.0126994	2.19949	up	noncoding	NR_033449	TCF7	RefSeq	3074	chr5	+	133451349	133483920	TCCTTGACCAGCACAAGGCCAATCAGCCCCCCCACGGTGTCCCCCAACTCTCTCTCTACG	exon sense-overlapping	NM_003202	TCF7	transcription factor 7 isoform 1	+	133450401	133483920	12.6968	11.5596
ASHGA5P020633	0.000106699	0.0126994	2.19949	up	noncoding	NR_033449	TCF7	RefSeq	3074	chr5	+	133451349	133483920	TCCTTGACCAGCACAAGGCCAATCAGCCCCCCCACGGTGTCCCCCAACTCTCTCTCTACG	exon sense-overlapping	NM_201632	TCF7	transcription factor 7 isoform 2	+	133451297	133483920	12.6968	11.5596
ASHGA5P020633	0.000106699	0.0126994	2.19949	up	noncoding	NR_033449	TCF7	RefSeq	3074	chr5	+	133451349	133483920	TCCTTGACCAGCACAAGGCCAATCAGCCCCCCCACGGTGTCCCCCAACTCTCTCTCTACG	exon sense-overlapping	NM_201634	TCF7	transcription factor 7 isoform 4	+	133451297	133483920	12.6968	11.5596
ASHGA5P020633	0.000106699	0.0126994	2.19949	up	noncoding	NR_033449	TCF7	RefSeq	3074	chr5	+	133451349	133483920	TCCTTGACCAGCACAAGGCCAATCAGCCCCCCCACGGTGTCCCCCAACTCTCTCTCTACG	exon sense-overlapping	NM_213648	TCF7	transcription factor 7 isoform 2	+	133451297	133483920	12.6968	11.5596
ASHGA5P028306	0.0139557	0.0546244	2.19865	up	noncoding	ENST00000477702	LINC00173	GENCODE	314	chr12	+	116973868	116974323	TGGAGACTCCTATTCACCCTTCAGATCAATATCCCCCAAATAAACTCCCAGTCACTCTGG	intergenic							8.3733	7.23669
ASHGA5P045076	0.00439432	0.0385905	2.19752	up	noncoding	NR_015445	BREA2	RefSeq	1002	chr8	+	144779284	144780583	CTGCAATATTCTTCTTTGGGAAGTACAATGCCAAGTAAATAAAGATATTTGGGGTCATTC	intergenic							7.97438	6.8385
ASHGA5P055965	0.00771901	0.0433457	2.19499	up	noncoding	ENST00000556705	RP11-85K15.2	GENCODE	580	chr14	-	35432913	35451738	GCTCACTGACAGAATAAAGGTACCTTTTAACTTAGTCAAATCTCTTTTGCATTGTTTTCC	intronic antisense	ENST00000556994	SRP54	signal recognition particle 54kDa [Source:HGNC Symbol;Acc:11301]	+	35451162	35498773	5.09285	3.95864
ASHGA5P045553	0.00644945	0.0410595	2.18901	up	noncoding	NR_024543	SNHG7	RefSeq	869	chr9	-	139619045	139622636	TCTTTAAGGATAATATTTCTGTGTTGGCAAAATTTGAGAGTAAATTGGTCTTGAATGGAA	natural antisense	NM_152421	FAM69B	protein FAM69B	+	139607023	139619170	7.07584	5.94557
ASHGA5P030902	0.00557299	0.0401563	2.18834	up	noncoding	ENST00000573130	RP11-473M20.7	GENCODE	2163	chr16	-	3103367	3106233	AAGGTCACTTTGTCCCTGGATGACCAAACACAGGCCAATGTAACTTACTGGGCTTGTTTT	intronic antisense	NM_022468	MMP25	matrix metalloproteinase-25 preproprotein	+	3096681	3110724	4.60226	3.47243
ASHGA5P032055	0.00726547	0.0426792	2.18805	up	noncoding	ENST00000570809	RP11-676J12.4	GENCODE	1755	chr17	-	666804	668559	CTCAGCGTGTCCATAACTTATCTTACCTCAAATCCATTCTTCTTCCAGTAATATTACATA	intron sense-overlapping	NM_016080	GLOD4	glyoxalase domain-containing protein 4	-	662548	685571	5.33979	4.21014
ASHGA5P019167	0.00698495	0.0420969	2.18756	up	noncoding	NR_045632	NFU1	RefSeq	793	chr2	-	69623244	69664760	GTGGCAATGATTAAGGAATTGTTAGATACTAGAATACGGTTATGGATGATGAATCAGATG	exon sense-overlapping	NM_001002755	NFU1	NFU1 iron-sulfur cluster scaffold homolog, mitochondrial isoform 2	-	69623244	69664760	5.48492	4.3556
ASHGA5P019167	0.00698495	0.0420969	2.18756	up	noncoding	NR_045632	NFU1	RefSeq	793	chr2	-	69623244	69664760	GTGGCAATGATTAAGGAATTGTTAGATACTAGAATACGGTTATGGATGATGAATCAGATG	exon sense-overlapping	NM_001002756	NFU1	NFU1 iron-sulfur cluster scaffold homolog, mitochondrial isoform 3	-	69623244	69664760	5.48492	4.3556
ASHGA5P019167	0.00698495	0.0420969	2.18756	up	noncoding	NR_045632	NFU1	RefSeq	793	chr2	-	69623244	69664760	GTGGCAATGATTAAGGAATTGTTAGATACTAGAATACGGTTATGGATGATGAATCAGATG	exon sense-overlapping	NM_015700	NFU1	NFU1 iron-sulfur cluster scaffold homolog, mitochondrial isoform 1	-	69623244	69664760	5.48492	4.3556
ASHGA5P042361	0.00589607	0.0404119	2.18175	up	noncoding	uc021yup.1	PMSP	UCSC_knowngene	1858	chr6	+	31431623	31433481	TGCTTGGTTGTTCAGGGCCATTTCAGGTTTGGGTGTTTTCTGGGGATGTTAACATGGGAT	intergenic							4.97122	3.84574
ASHGA5P028907	0.00909689	0.0453126	2.18044	up	noncoding	ENST00000434547	STK24-AS1	GENCODE	1278	chr13	+	99229497	99231084	AACGGAACAGCCAAAAAGTCTCACAGAGGTTAAGTAAATAATAGCATTTTCATACGAGTA	bidirectional	NM_001032296	STK24	serine/threonine-protein kinase 24 isoform b	-	99102454	99229396	4.69791	3.57329
ASHGA5P049556	0.0156268	0.0580703	2.1792	up	noncoding	ENST00000458332	RPS2P46	pseudogene	883	chr17	-	19349282	19350165	ATCTATCTCTTCTCCCTGCCCAATTAAGGAATCAGAGATCATTGATTTCTTCCTGGGGGC								10.0611	8.93732
ASHGA5P035408	0.0026829	0.03424	2.17831	up	noncoding	NR_045786	LOC100861402	RefSeq	2992	chr2	-	169628460	169642939	GAATTGTCTTAAGAAAACAAGTAAGGTTTTGTCACCTATCCTATTTCTCACTGCAAGTTG	natural antisense	NM_001256126	CERS6	ceramide synthase 6 isoform 1	+	169312758	169631644	5.247	4.1238
ASHGA5P035408	0.0026829	0.03424	2.17831	up	noncoding	NR_045786	LOC100861402	RefSeq	2992	chr2	-	169628460	169642939	GAATTGTCTTAAGAAAACAAGTAAGGTTTTGTCACCTATCCTATTTCTCACTGCAAGTTG	natural antisense	NM_203463	CERS6	ceramide synthase 6 isoform 2	+	169312758	169631644	5.247	4.1238
ASHGA5P043646	0.0455743	0.110794	2.17142	up	noncoding	uc010kyk.2	BC008049	UCSC_knowngene	1942	chr7	+	44808453	44810735	TTTCTTGTGAATGTGCCAAGTATTACATAAAAACCAAAAGGCTGACCAGACTTAACAGTG	exon sense-overlapping	NM_031449	ZMIZ2	zinc finger MIZ domain-containing protein 2 isoform 1	+	44788529	44809479	5.95365	4.83501
ASHGA5P043646	0.0455743	0.110794	2.17142	up	noncoding	uc010kyk.2	BC008049	UCSC_knowngene	1942	chr7	+	44808453	44810735	TTTCTTGTGAATGTGCCAAGTATTACATAAAAACCAAAAGGCTGACCAGACTTAACAGTG	exon sense-overlapping	NM_174929	ZMIZ2	zinc finger MIZ domain-containing protein 2 isoform 2	+	44795786	44809479	5.95365	4.83501
ASHGA5P000102	0.0110143	0.0488846	2.17084	up	noncoding	BC046172		RNAdb	525	chr6	+	17707072	17707569	CGGTTGGTTAAGTAGGCAGGAAGTAAGCAGACAGTAAAATCAAAGACAAGAGCTAATGAT	intergenic							5.85742	4.73916
ASHGA5P054137	0.0139686	0.0546244	2.16712	up	noncoding	NR_038461	LOC100128420	RefSeq	701	chrX	+	135721701	135724588	GAAGGCTTTGATCCCAAGCCTGCAGCCGTAAGAGAAGAACGAGCCCATGAGTTCCAGCCT	intergenic							4.95715	3.84137
ASHGA5P046984	0.00290619	0.0349843	2.16589	up	noncoding	ENST00000366446	RP11-322M19.1	GENCODE	819	chr10	-	89093796	89096586	GTGTCAGAGAAAGAGTTAGTTTGGGGAAATATCCTCTCCACCACAATCTTAGTCATTGAA	intergenic							5.69222	4.57726
ASHGA5P041667	0.00874906	0.0447449	2.16409	up	noncoding	ENST00000472178	LINC00518	GENCODE	853	chr6	-	10429941	10434728	GGTTTTATGTAGTGAATTTGGCTAAAATGGTAGAGCTCCCTGATTCTAACCTCCCTGCAG	intergenic							5.78671	4.67295
ASHGA5P025990	0.0344377	0.0927129	2.16165	up	noncoding	NR_048557	TSN	RefSeq	3217	chr2	+	122513120	122525428	CATCCGAGAGATTTCATGAGCACTGGAGGTTTGTGTTGCAGCGCTTGGTCTTCTTGGCAG	exon sense-overlapping	NM_001261401	TSN	translin isoform 2	+	122513120	122525428	4.58109	3.46895
ASHGA5P025990	0.0344377	0.0927129	2.16165	up	noncoding	NR_048557	TSN	RefSeq	3217	chr2	+	122513120	122525428	CATCCGAGAGATTTCATGAGCACTGGAGGTTTGTGTTGCAGCGCTTGGTCTTCTTGGCAG	exon sense-overlapping	NM_004622	TSN	translin isoform 1	+	122513120	122525428	4.58109	3.46895
ASHGA5P054706	0.0206958	0.0682776	2.16063	up	noncoding	TCONS_00006375	XLOC_002995	LincRNAs identified by Cabili et al	543	chr3	+	195362628	195363268	CTCGGGCCAGGTGACCTTTATGGCGGCGCCTTCTGTCCCTGGTCGCTTTTCCACTGAATG	intron sense-overlapping	ENST00000381954	MUC20	mucin 20, cell surface associated [Source:HGNC Symbol;Acc:23282]	+	195343315	195460421	6.59939	5.48794
ASHGA5P032069	0.00547763	0.0401185	2.16017	up	noncoding	NR_028504	MIR22HG	RefSeq	1439	chr17	-	1614797	1619566	TGAACTCCCTGGGAACAAGTCAGTTGGGCTGATCACTGAACTCACATTTCTGGACCTGAG	bidirectional	NM_001163673	WDR81	WD repeat-containing protein 81 isoform 3	+	1619816	1641893	6.0063	4.89516
ASHGA5P032069	0.00547763	0.0401185	2.16017	up	noncoding	NR_028504	MIR22HG	RefSeq	1439	chr17	-	1614797	1619566	TGAACTCCCTGGGAACAAGTCAGTTGGGCTGATCACTGAACTCACATTTCTGGACCTGAG	bidirectional	NM_152348	WDR81	WD repeat-containing protein 81 isoform 2	+	1619816	1641893	6.0063	4.89516
ASHGA5P040991	0.0041072	0.0377672	2.15862	up	noncoding	ENST00000416930	RP11-1C1.7	GENCODE	483	chr5	+	10479482	10482421	TGCTACACTTTCTTATCATAGTTTACCGCAATTAAAAATCAAAACAAAACAAAACGAAAA	intergenic							4.86277	3.75266
ASHGA5P018606	0.0131706	0.052964	2.15683	up	noncoding	ENST00000455503	RP11-126K1.6	GENCODE	618	chr1	+	151319442	151320503	AACAATAAAGTTTAGTCTACGGTCCTCAGAGCTGCCGGAAGAGAAGAATCAATGGATGAT	intronic antisense	NM_000449	RFX5	DNA-binding protein RFX5	-	151313115	151319769	4.42453	3.31561
ASHGA5P018606	0.0131706	0.052964	2.15683	up	noncoding	ENST00000455503	RP11-126K1.6	GENCODE	618	chr1	+	151319442	151320503	AACAATAAAGTTTAGTCTACGGTCCTCAGAGCTGCCGGAAGAGAAGAATCAATGGATGAT	intronic antisense	NM_001025603	RFX5	DNA-binding protein RFX5	-	151313115	151319769	4.42453	3.31561
ASHGA5P038775	0.0275551	0.0805853	2.15626	up	noncoding	uc003cmy.1	DQ592230	UCSC_knowngene	4060	chr3	+	44159797	44163857	TATGGGTTGCTCTGAAATTAGCCTTTACACTTGGCATTGTGAAAAATCTTTCCAAATCAT	intergenic							5.01599	3.90746
ASHGA5P042482	0.00345861	0.0361534	2.1554	up	noncoding	uc003pdp.3	KIAA1702	UCSC_knowngene	4385	chr6	+	56965018	56969403	TTGTGGATTTGACTTCTCTGATTCCTTTTGCTGACCTTGAGTGGATTGTATCTTTCACTG	exon sense-overlapping	NM_001257273	ZNF451	zinc finger protein 451 isoform 3	+	56954807	56974512	5.35239	4.24443
ASHGA5P042482	0.00345861	0.0361534	2.1554	up	noncoding	uc003pdp.3	KIAA1702	UCSC_knowngene	4385	chr6	+	56965018	56969403	TTGTGGATTTGACTTCTCTGATTCCTTTTGCTGACCTTGAGTGGATTGTATCTTTCACTG	intron sense-overlapping	NM_001031623	ZNF451	zinc finger protein 451 isoform 1	+	56954827	57035098	5.35239	4.24443
ASHGA5P042482	0.00345861	0.0361534	2.1554	up	noncoding	uc003pdp.3	KIAA1702	UCSC_knowngene	4385	chr6	+	56965018	56969403	TTGTGGATTTGACTTCTCTGATTCCTTTTGCTGACCTTGAGTGGATTGTATCTTTCACTG	intron sense-overlapping	NM_015555	ZNF451	zinc finger protein 451 isoform 2	+	56954827	57035098	5.35239	4.24443
ASHGA5P021235	0.00614555	0.0408325	2.15169	up	noncoding	NR_033805	LOC220906	RefSeq	5376	chr10	-	28808845	28821283	AAGTTCTCAGAGTCGTCCTTGTCTACTCCACTACCAAATGTTGAAGTTCTTCAAGAATCA	bidirectional	ENST00000347934	WAC	WW domain containing adaptor with coiled-coil [Source:HGNC Symbol;Acc:17327]	+	28822241	28909472	5.80098	4.69552
ASHGA5P021235	0.00614555	0.0408325	2.15169	up	noncoding	NR_033805	LOC220906	RefSeq	5376	chr10	-	28808845	28821283	AAGTTCTCAGAGTCGTCCTTGTCTACTCCACTACCAAATGTTGAAGTTCTTCAAGAATCA	bidirectional	ENST00000375646	WAC	WW domain containing adaptor with coiled-coil [Source:HGNC Symbol;Acc:17327]	+	28821712	28908905	5.80098	4.69552
ASHGA5P021235	0.00614555	0.0408325	2.15169	up	noncoding	NR_033805	LOC220906	RefSeq	5376	chr10	-	28808845	28821283	AAGTTCTCAGAGTCGTCCTTGTCTACTCCACTACCAAATGTTGAAGTTCTTCAAGAATCA	bidirectional	ENST00000375664	WAC	WW domain containing adaptor with coiled-coil [Source:HGNC Symbol;Acc:17327]	+	28821421	28909928	5.80098	4.69552
ASHGA5P021235	0.00614555	0.0408325	2.15169	up	noncoding	NR_033805	LOC220906	RefSeq	5376	chr10	-	28808845	28821283	AAGTTCTCAGAGTCGTCCTTGTCTACTCCACTACCAAATGTTGAAGTTCTTCAAGAATCA	bidirectional	ENST00000526722	WAC	WW domain containing adaptor with coiled-coil [Source:HGNC Symbol;Acc:17327]	+	28821701	28824655	5.80098	4.69552
ASHGA5P032116	0.0197152	0.0662345	2.15125	up	noncoding	ENST00000438266	AC109333.10	GENCODE	583	chr17	-	4922508	4923388	GTGATATTCTATAAGATGGGATAATGAAGTCTGAATGAAGAGTGGTTAGAAGGCCCAAAA	natural antisense	NM_006612	KIF1C	kinesin-like protein KIF1C	+	4901242	4931694	6.20504	5.09987
ASHGA5P033492	0.017096	0.0609835	2.15124	up	noncoding	NR_026849	LINC00526	RefSeq	1322	chr18	-	5236722	5238028	AAGGATACTTTGACAGTTTTCATTTGTCGTCTACATGTATATGGTACGTTTCATTCTGCC	intergenic							6.15306	5.04789
ASHGA5P047957	0.00910998	0.0453126	2.15011	up	noncoding	uc009ygt.2	AL833346	UCSC_knowngene	3389	chr11	-	16798843	16802232	CTCCATATGCTGCCAGTATCGACTTCATGACATTTGCCAAAATAAAATTTTATTTTTGCC	exon sense-overlapping	ENST00000531066	PLEKHA7	pleckstrin homology domain containing, family A member 7 [Source:HGNC Symbol;Acc:27049]	-	16799841	17035990	4.59815	3.49374
ASHGA5P016640	0.000194187	0.0140992	2.14822	up	noncoding	ENST00000432473	Z83851.1	GENCODE	780	chr22	-	42760405	42765174	TCAGCAACCCGGGGGCAGCGTTTTCCCCCTACCGGAAATCTGATGGGCTTATGACATCAT	intergenic							5.00209	3.89895
ASHGA5P042362	0.0085501	0.0443672	2.14817	up	noncoding	NR_002812	HCG26	RefSeq	1180	chr6	+	31439005	31440185	GCAGGTTGTTTAACCTTATATGTACAGTTTCACATATGTATAAAAACAGTAGTTTGGGCC	intergenic							6.93542	5.83231
ASHGA5P053588	0.0077082	0.0433457	2.14269	up	noncoding	ENST00000523031	RP13-582O9.5	GENCODE	689	chr8	-	144362330	144363019	ATCACAAGTCTGTTAAGGTTGGAGAATCAAGTGAACATGCTGAAAAGTTATGGGGAATGT	intergenic							6.21244	5.11301
ASHGA5P011493	0.00455326	0.0386894	2.14249	up	noncoding	NR_003604	ZNFX1-AS1	RefSeq	1020	chr20	+	47894714	47905795	TGATCTTGGCTTGATTCAGTCTGCCTTGTAACAGAAACTGGCGATGGAATATGAGAGGAG	natural antisense	NM_021035	ZNFX1	NFX1-type zinc finger-containing protein 1	-	47862438	47894756	8.09419	6.9949
ASHGA5P056527	0.0168034	0.0604777	2.13869	up	noncoding	TCONS_00005314	XLOC_002461	LincRNAs identified by Cabili et al	791	chr2	-	201979496	201980387	AAACTCTTGGATCAGAATCTCCCAGTCAGAGACCAGCATATCAGCATTTCTCATCTTGCC	intergenic							5.65752	4.5608
ASHGA5P021316	0.0107361	0.0483188	2.13678	up	noncoding	ENST00000529934	RP11-802E16.3	GENCODE	326	chr11	+	67818206	67820852	TTTAGCTGAGGACATTTCATATATATGGATTTCACAGCTACACTCGATCCACGCCCCACA	exon sense-overlapping	NM_006019	TCIRG1	V-type proton ATPase 116 kDa subunit a isoform 3 isoform a	+	67806461	67818366	4.5216	3.42617
ASHGA5P021316	0.0107361	0.0483188	2.13678	up	noncoding	ENST00000529934	RP11-802E16.3	GENCODE	326	chr11	+	67818206	67820852	TTTAGCTGAGGACATTTCATATATATGGATTTCACAGCTACACTCGATCCACGCCCCACA	exon sense-overlapping	NM_006053	TCIRG1	V-type proton ATPase 116 kDa subunit a isoform 3 isoform b	+	67810446	67818366	4.5216	3.42617
ASHGA5P021316	0.0107361	0.0483188	2.13678	up	noncoding	ENST00000529934	RP11-802E16.3	GENCODE	326	chr11	+	67818206	67820852	TTTAGCTGAGGACATTTCATATATATGGATTTCACAGCTACACTCGATCCACGCCCCACA	natural antisense	NM_001277	CHKA	choline kinase alpha isoform a	-	67820325	67888858	4.5216	3.42617
ASHGA5P021316	0.0107361	0.0483188	2.13678	up	noncoding	ENST00000529934	RP11-802E16.3	GENCODE	326	chr11	+	67818206	67820852	TTTAGCTGAGGACATTTCATATATATGGATTTCACAGCTACACTCGATCCACGCCCCACA	natural antisense	NM_212469	CHKA	choline kinase alpha isoform b	-	67820325	67888858	4.5216	3.42617
ASHGA5P055204	0.0138652	0.0544048	2.13468	up	noncoding	TCONS_00006556	XLOC_003181	LincRNAs identified by Cabili et al	202	chr3	-	96336587	96337008	AGATTTATAGGTAGAGGCGACAAACCTATCGAGCCTGGTGATAGCTGGTTGTCCAAGATA	intergenic							12.0105	10.9165
ASHGA5P000227	0.0205608	0.0680486	2.1344	up	noncoding	chr12:53675775-53689275-	chr12:53675775-53689275	LincRNAs identified by Khalil et al	13500	chr12	-	55389508	55403008	TCACTCAACTTAATTCCTGCTATCCCCTCAAGGAAAGCCTTTGAAGTCACCGAAGTCAGT	intergenic							5.87891	4.78508
ASHGA5P054959	0.015163	0.0569856	2.1316	up	noncoding	uc010rog.2	NEAT1	UCSC_knowngene	21760	chr11	+	65190268	65212028	CTCATTAGAATTGTTGTATTGCTATGTTACATTTCTCGACCCCTATCACATTGCCTTCAT	intergenic							7.1828	6.09087
ASHGA5P018335	0.00594941	0.0404867	2.13069	up	noncoding	ENST00000452249	AC003075.4	GENCODE	441	chr7	-	17325902	17338070	CATTTAACAGTGTTGTGAACCACTTGTCATGGGATAACCAAAATTAAACCTGGAATCGCA	bidirectional	NM_001621	AHR	aryl hydrocarbon receptor precursor	+	17338275	17385775	5.49783	4.4065
ASHGA5P030529	0.0112807	0.0491399	2.13061	up	noncoding	ENST00000569135	RP11-353B9.1	GENCODE	4094	chr15	+	49944335	49948429	GCTCAAGAAATACTTTATGTTTGTCCTATATGAAAGTGTTGATTGCACCTGGTTCTTTGC	intergenic							5.04953	3.95826
ASHGA5P037900	0.000957743	0.0254289	2.12804	up	noncoding	ENST00000425112	TTC28-AS1	GENCODE	807	chr22	+	28315505	28382217	TACTTAGACACATTAAGAGACATTACAGGGACACCTGCAAGTATGTCTCCCTGGGGAGAA	intronic antisense	NM_001145418	TTC28	tetratricopeptide repeat protein 28	-	28374001	29075853	5.61491	4.52538
ASHGA5P035124	0.00455663	0.0386894	2.12604	up	noncoding	uc002snv.4	BC024248	UCSC_knowngene	1181	chr2	-	78639670	78769187	GGCAATCCTGATTTAAAACTAAGACTGGCTTGTGGTTAAATGAATGTGTTCAGTTTTTGA	intergenic							5.2664	4.17823
ASHGA5P033017	0.00852577	0.0443648	2.12224	up	noncoding	ENST00000580085	CTD-2349P21.9	GENCODE	462	chr17	+	29119389	29119851	CCATTAACAGGGTATCATGATCAGTCCCACAAATTACAAAAGATTTTAGTATATTCCTGC	natural antisense	NM_015986	CRLF3	cytokine receptor-like factor 3	-	29109701	29151778	5.9236	4.83801
ASHGA5P043141	0.00963796	0.0463356	2.1207	up	noncoding	uc010lcl.3	DQ571357	UCSC_knowngene	4269	chr7	-	74800784	74805053	CTTATTTTCTTGTTGAAGAAACACAAAACCCTCGAGATTCATGTACTGTATGTTGGAGAA	intergenic							6.28949	5.20495
ASHGA5P043406	0.0409606	0.103592	2.11566	up	noncoding	ENST00000467944	RP4-798C17.6	GENCODE	422	chr7	-	144004237	144040392	GATGGTTTCCCTAGAAGCTACTACCTCTCCCTGGAGGGTGGAGATATTTGCTGGTCAAAG	intronic antisense	NM_001001802	OR2A42	olfactory receptor 2A1/2A42	+	144015217	144016150	7.41415	6.33304
ASHGA5P043406	0.0409606	0.103592	2.11566	up	noncoding	ENST00000467944	RP4-798C17.6	GENCODE	422	chr7	-	144004237	144040392	GATGGTTTCCCTAGAAGCTACTACCTCTCCCTGGAGGGTGGAGATATTTGCTGGTCAAAG	intronic antisense	NM_001005287	OR2A1	olfactory receptor 2A1/2A42	+	144015217	144016150	7.41415	6.33304
ASHGA5P058565	0.00774062	0.0433457	2.11021	up	noncoding	uc010lad.3	LOC493754	UCSC_knowngene	1237	chr7	-	65996302	66057371	GGAGAGGATGGCTACTATTTCACCAATCTGAGACGGGGGCAGTCTCACTACATGGCCCAG	intergenic							5.38128	4.30389
ASHGA5P031506	0.0129041	0.0525337	2.10986	up	noncoding	uc009wxo.1	AK056657	UCSC_knowngene	2427	chr1	-	180913174	180945618	ATCTGAGGAGTCAAGGGAGTTTTTGTTTTGCTTTTTAGCTGAAATAACAACTTTAGTGCT	exon sense-overlapping	NM_005819	STX6	syntaxin-6	-	180942175	180992046	5.60614	4.52899
ASHGA5P031506	0.0129041	0.0525337	2.10986	up	noncoding	uc009wxo.1	AK056657	UCSC_knowngene	2427	chr1	-	180913174	180945618	ATCTGAGGAGTCAAGGGAGTTTTTGTTTTGCTTTTTAGCTGAAATAACAACTTTAGTGCT	natural antisense	NM_020950	KIAA1614	uncharacterized protein KIAA1614	+	180882312	180915239	5.60614	4.52899
ASHGA5P029917	0.00968493	0.0463839	2.10381	up	noncoding	ENST00000452962	RP11-307C12.11	GENCODE	822	chr1	-	155017666	155018594	CCAAAGCCCTACATAATGCTTCAGTTTGCTAAGGAAAAAATGTTAATTACTGCAAATGTG	natural antisense	NM_001143687	DCST1	DC-STAMP domain-containing protein 1 isoform 2	+	155006281	155023406	5.23681	4.16381
ASHGA5P029917	0.00968493	0.0463839	2.10381	up	noncoding	ENST00000452962	RP11-307C12.11	GENCODE	822	chr1	-	155017666	155018594	CCAAAGCCCTACATAATGCTTCAGTTTGCTAAGGAAAAAATGTTAATTACTGCAAATGTG	natural antisense	NM_152494	DCST1	DC-STAMP domain-containing protein 1 isoform 1	+	155006281	155023406	5.23681	4.16381
ASHGA5P054391	0.0060245	0.0405793	2.10301	up	noncoding	NR_046284	LOC100128511	RefSeq	529	chr10	+	21463230	21463852	CGACTGTGCGGCCTGGGGAGTGAGCCTCGCGCCACCGCCGCTGCAGGCCGGGGAGCCCAG	bidirectional	NM_001173484	NEBL	nebulette isoform 3	-	21068902	21463116	5.88074	4.80828
ASHGA5P054391	0.0060245	0.0405793	2.10301	up	noncoding	NR_046284	LOC100128511	RefSeq	529	chr10	+	21463230	21463852	CGACTGTGCGGCCTGGGGAGTGAGCCTCGCGCCACCGCCGCTGCAGGCCGGGGAGCCCAG	bidirectional	NM_213569	NEBL	nebulette isoform 2	-	21068902	21463116	5.88074	4.80828
ASHGA5P042081	0.0164409	0.0599215	2.098	up	noncoding	ENST00000431144	RP11-356I2.4	GENCODE	777	chr6	-	138178836	138182628	GTGTGTTCCTGAGAAAGACTAAACCAGTTATTTTCTCCTTTCATGTTTGAATGAATAACC	intergenic							6.91559	5.84658
ASHGA5P019256	0.00703537	0.0422351	2.09325	up	noncoding	ENST00000483436	SNHG12	GENCODE	682	chr1	-	28905057	28908330	TACTGAGGAGATTCATGTTACATGTAAAGCTGTCCTCATTTGTGACTATGGACCTATGGA	intergenic							6.91749	5.85175
ASHGA5P036390	0.00827347	0.044007	2.09301	up	noncoding	ENST00000429730	AC079767.4	GENCODE	492	chr2	+	208527098	208531748	TGATTTGGAGGCGTGTTCTCATTCAAAACCTTGCAAAATATAATTTCTTCTTGTCTGGGA	intergenic							7.21919	6.15361
ASHGA5P043035	0.0120246	0.0505621	2.09264	up	noncoding	ENST00000454572	POLR2J4	GENCODE	2076	chr7	-	43991508	44058750	GTGCACTTACTCTCATCATTGTAATGACACTTGATGCTATGAGACTATAAATTAGAGAGA	intronic antisense	NM_175064	SPDYE1	putative WBSCR19-like protein 6	+	44040488	44049723	4.76047	3.69514
ASHGA5P043035	0.0120246	0.0505621	2.09264	up	noncoding	ENST00000454572	POLR2J4	GENCODE	2076	chr7	-	43991508	44058750	GTGCACTTACTCTCATCATTGTAATGACACTTGATGCTATGAGACTATAAATTAGAGAGA	natural antisense	NM_015983	UBE2D4	ubiquitin-conjugating enzyme E2 D4	+	43966034	43995735	4.76047	3.69514
ASHGA5P035948	0.00960747	0.0463097	2.09199	up	noncoding	uc021ojb.1	RCAN3AS	UCSC_knowngene	277	chr1	-	24822822	24828850	AGGTGTCTGTTGCAGCCAAACACAATCCCAACTGATATTCACTGTAAATGATTCCATGGC	natural antisense	NM_001251979	RCAN3	calcipressin-3 isoform 1	+	24828840	24863510	6.97219	5.90732
ASHGA5P035948	0.00960747	0.0463097	2.09199	up	noncoding	uc021ojb.1	RCAN3AS	UCSC_knowngene	277	chr1	-	24822822	24828850	AGGTGTCTGTTGCAGCCAAACACAATCCCAACTGATATTCACTGTAAATGATTCCATGGC	natural antisense	NM_001251984	RCAN3	calcipressin-3 isoform 5	+	24828840	24863510	6.97219	5.90732
ASHGA5P039370	0.00118479	0.0266463	2.09135	up	noncoding	ENST00000472346	RP11-293A21.1	GENCODE	327	chr4	-	26861430	26861866	ACTCCAAAATTATCGTTACCCCCTTTTACGAATGAAGAGACTAAGACCTAGAAATGTGAA	bidirectional	NM_001169117	STIM2	stromal interaction molecule 2 isoform 3 precursor	+	26862312	27027003	6.02669	4.96225
ASHGA5P039370	0.00118479	0.0266463	2.09135	up	noncoding	ENST00000472346	RP11-293A21.1	GENCODE	327	chr4	-	26861430	26861866	ACTCCAAAATTATCGTTACCCCCTTTTACGAATGAAGAGACTAAGACCTAGAAATGTGAA	bidirectional	NM_001169118	STIM2	stromal interaction molecule 2 isoform 1 precursor	+	26862312	27027003	6.02669	4.96225
ASHGA5P039370	0.00118479	0.0266463	2.09135	up	noncoding	ENST00000472346	RP11-293A21.1	GENCODE	327	chr4	-	26861430	26861866	ACTCCAAAATTATCGTTACCCCCTTTTACGAATGAAGAGACTAAGACCTAGAAATGTGAA	bidirectional	NM_020860	STIM2	stromal interaction molecule 2 isoform 2 precursor	+	26862312	27027003	6.02669	4.96225
ASHGA5P045441	0.00832867	0.0440999	2.09036	up	noncoding	ENST00000567068	RP11-244O19.1	GENCODE	3779	chr9	-	124577952	124581731	CTTCATAAAACGCAATAATAAAACGAAGCTGAGTGTTGCTAAACACAGGCTCATTGTATA	intergenic							5.26802	4.20427
ASHGA5P023570	0.00657275	0.0414551	2.08807	up	noncoding	ENST00000584391	RP11-580I16.2	GENCODE	442	chr17	-	45699207	45726786	ACAGGTCTTTAATTTAATTCTGGAGTGTGAGCAGGAACCAGTTAACTACATTCATTGTCC	natural antisense	NM_006310	NPEPPS	puromycin-sensitive aminopeptidase	+	45608443	45700642	5.0542	3.99203
ASHGA5P020105	0.00847275	0.0442397	2.08797	up	noncoding	ENST00000508286	LEF1-AS1	GENCODE	444	chr4	+	109094574	109097586	GGTGGATATGTGCTCCAGGAAAGTACCTGATTGACAAGATCTACATCCAATGCCCAGAAA	intergenic							5.88572	4.82361
ASHGA5P017202	0.0336794	0.0912403	2.08445	up	noncoding	ENST00000438858	GUSBP11	GENCODE	543	chr22	-	24002062	24032678	CCAGGAACAGGATCCACCTCTGATGTTCAGTGAAGACTACCAGAAAAGTCTGCTAGAGCA	intronic antisense	ENST00000401461	RGL4	ral guanine nucleotide dissociation stimulator-like 4 [Source:HGNC Symbol;Acc:31911]	+	24030328	24041363	4.95044	3.89077
ASHGA5P055624	0.00105137	0.0258525	2.08356	up	noncoding	NR_015404	MAPKAPK5-AS1	RefSeq	2285	chr12	-	112277572	112280706	ATTCCTCAAAGTAAAATTTAAGTGTGGCTCTGTGCCTATGCTCTCCCCAGCGGAAAGTGA	natural antisense	NM_003668	MAPKAPK5	MAP kinase-activated protein kinase 5 isoform 1	+	112280278	112331228	7.06011	6.00106
ASHGA5P055624	0.00105137	0.0258525	2.08356	up	noncoding	NR_015404	MAPKAPK5-AS1	RefSeq	2285	chr12	-	112277572	112280706	ATTCCTCAAAGTAAAATTTAAGTGTGGCTCTGTGCCTATGCTCTCCCCAGCGGAAAGTGA	natural antisense	NM_139078	MAPKAPK5	MAP kinase-activated protein kinase 5 isoform 2	+	112280278	112331228	7.06011	6.00106
ASHGA5P042320	0.0314945	0.0874701	2.08328	up	noncoding	ENST00000440790	ZNF192P1	GENCODE	1628	chr6	+	28129558	28137372	CTAAGCAGTGAGTGGTATTCTGAAGACTTTGAAGGAGGAGCTATTTCTGAAAATAAATTT	intergenic							5.52278	4.46392
ASHGA5P018311	0.0370463	0.0974062	2.08167	up	noncoding	ENST00000451837	GUSBP11	GENCODE	3234	chr22	-	23980673	24059508	ATTTTGCCGATTTCATGACTAACCAGTGTTCCTGCTCCAGCGTGGCTCCTGGACTGGCGC	natural antisense	NM_153615	RGL4	ral-GDS-related protein precursor	+	24033047	24041363	5.49177	4.43402
ASHGA5P034873	0.0309116	0.086453	2.07868	up	noncoding	ENST00000412712	AC011747.7	GENCODE	953	chr2	-	8806765	8818464	GGGGGACAGAGATGTGCATGCTGTTATACACTCTATATTGAAATGATTGTATAACAATAT	bidirectional	ENST00000234091	ID2	inhibitor of DNA binding 2, dominant negative helix-loop-helix protein [Source:HGNC Symbol;Acc:5361]	+	8818974	8824583	6.75124	5.69557
ASHGA5P027949	0.0116423	0.0498651	2.07772	up	noncoding	ENST00000552502	RP1-197B17.3	GENCODE	460	chr12	+	48111373	48114229	CTGGCAGTACACAAGTTGTGAGAGTTTGCTACCATTTTTACATTTTTGTGATTTAAAGTG	natural antisense	NM_001172439	ENDOU	poly(U)-specific endoribonuclease isoform 1 precursor	-	48103517	48119355	4.81617	3.76117
ASHGA5P027949	0.0116423	0.0498651	2.07772	up	noncoding	ENST00000552502	RP1-197B17.3	GENCODE	460	chr12	+	48111373	48114229	CTGGCAGTACACAAGTTGTGAGAGTTTGCTACCATTTTTACATTTTTGTGATTTAAAGTG	natural antisense	NM_001172440	ENDOU	poly(U)-specific endoribonuclease isoform 3 precursor	-	48103517	48119355	4.81617	3.76117
ASHGA5P027949	0.0116423	0.0498651	2.07772	up	noncoding	ENST00000552502	RP1-197B17.3	GENCODE	460	chr12	+	48111373	48114229	CTGGCAGTACACAAGTTGTGAGAGTTTGCTACCATTTTTACATTTTTGTGATTTAAAGTG	natural antisense	NM_006025	ENDOU	poly(U)-specific endoribonuclease isoform 2 precursor	-	48103517	48119355	4.81617	3.76117
ASHGA5P035746	0.0132114	0.053033	2.0761	up	noncoding	ENST00000565841	AC012065.7	GENCODE	1437	chr2	+	20877568	20879005	CCTCCCAGGGCTGGTAGAAACCTATGTGTATATATATTCTCAAATTTAAATAGATTGTAC	intergenic							5.13387	4.08
ASHGA5P000021	0.0034676	0.0361534	2.07546	up	noncoding	AI767017		LincRNAs identified by Khalil et al	415	chr4	-	56782130	56814048	CAAAAGATAGAATCTATCAAGCTACAAATGGCTATGTTGCCTGAAGCCCCAGACATCATC	intergenic							6.31864	5.26521
ASHGA5P044153	0.02225	0.0711023	2.0726	up	noncoding	ENST00000514980	RP11-582J16.4	GENCODE	4076	chr8	-	22398357	22402918	GACTGAATTATAAATGCACCTCCACGTTGAAGTTGTTTTGAGTTGCTTTTCATTTTCCAA	natural antisense	NM_001243974	PPP3CC	serine/threonine-protein phosphatase 2B catalytic subunit gamma isoform isoform 1	+	22298482	22398657	6.16924	5.1178
ASHGA5P044153	0.02225	0.0711023	2.0726	up	noncoding	ENST00000514980	RP11-582J16.4	GENCODE	4076	chr8	-	22398357	22402918	GACTGAATTATAAATGCACCTCCACGTTGAAGTTGTTTTGAGTTGCTTTTCATTTTCCAA	natural antisense	NM_001243975	PPP3CC	serine/threonine-protein phosphatase 2B catalytic subunit gamma isoform isoform 3	+	22298482	22398657	6.16924	5.1178
ASHGA5P044153	0.02225	0.0711023	2.0726	up	noncoding	ENST00000514980	RP11-582J16.4	GENCODE	4076	chr8	-	22398357	22402918	GACTGAATTATAAATGCACCTCCACGTTGAAGTTGTTTTGAGTTGCTTTTCATTTTCCAA	natural antisense	NM_005605	PPP3CC	serine/threonine-protein phosphatase 2B catalytic subunit gamma isoform isoform 2	+	22298482	22398657	6.16924	5.1178
ASHGA5P051278	0.014011	0.0547038	2.07136	up	noncoding	ENST00000436996	TTC28-AS1	GENCODE	662	chr22	+	28315424	28318558	GTGGGTTGTAAGTTTTACCAGTAATTGTCTATAGATACAAAAAGGAGCCAACCTCTTTTT	intronic antisense	ENST00000415296	PITPNB	phosphatidylinositol transfer protein, beta [Source:HGNC Symbol;Acc:9002]	-	28256183	28316122	4.6828	3.63222
ASHGA5P055525	0.0064073	0.0410595	2.07106	up	noncoding	ENST00000549651	RP11-611E13.2	GENCODE	883	chr12	-	70636085	70637140	TTTGCAATAATTCGCCTTTATTTCCTTGTATATCTGTAAACTCTTCACTTTTTTGTAATT	natural antisense	NM_001199302	CNOT2	CCR4-NOT transcription complex subunit 2	+	70636809	70748773	7.00291	5.95254
ASHGA5P055525	0.0064073	0.0410595	2.07106	up	noncoding	ENST00000549651	RP11-611E13.2	GENCODE	883	chr12	-	70636085	70637140	TTTGCAATAATTCGCCTTTATTTCCTTGTATATCTGTAAACTCTTCACTTTTTTGTAATT	natural antisense	NM_014515	CNOT2	CCR4-NOT transcription complex subunit 2	+	70636773	70748773	7.00291	5.95254
ASHGA5P044549	0.0221584	0.0709206	2.06975	up	noncoding	ENST00000568248	AC083843.1	GENCODE	6253	chr8	-	135804262	135810515	AATTATTTCCCAGTTACCATGTTTTAAAACAGCCTCTCAGAATTCCCCACTTCTAATTTC	intergenic							8.64538	7.59593
ASHGA5P029504	0.0102558	0.0473874	2.06304	up	noncoding	ENST00000557373	RP11-73E17.2	GENCODE	2117	chr14	+	35343548	35345665	TATCTTTCAGGCTGGCTTTAACTGTTCATACACCTAGCAAAATAAACATTTGTGAAAGGC	natural antisense	NM_013448	BAZ1A	bromodomain adjacent to zinc finger domain protein 1A isoform a	-	35221936	35344853	7.17221	6.12743
ASHGA5P029504	0.0102558	0.0473874	2.06304	up	noncoding	ENST00000557373	RP11-73E17.2	GENCODE	2117	chr14	+	35343548	35345665	TATCTTTCAGGCTGGCTTTAACTGTTCATACACCTAGCAAAATAAACATTTGTGAAAGGC	natural antisense	NM_182648	BAZ1A	bromodomain adjacent to zinc finger domain protein 1A isoform b	-	35221936	35344853	7.17221	6.12743
ASHGA5P015056	0.039092	0.100802	2.06256	up	noncoding	ENST00000416099	RP11-552M11.4	GENCODE	723	chr1	-	111981261	111983850	AAGAAGCAGGACTTGCTGTTCTCTGGTCCACCAAGGGCTATGAGGCTCACCCCTTGGATG	exon sense-overlapping	NM_024102	WDR77	methylosome protein 50	-	111982511	111991830	6.46206	5.41763
ASHGA5P032298	0.0130888	0.0528323	2.06209	up	noncoding	ENST00000582858	RP11-192H23.8	GENCODE	458	chr17	-	26928844	26929302	GTCAACACCAATCCTATACTCCTCTAGAAAAGTATCTTTGTAGCTCTACTCATTATTTCT	intron sense-overlapping	ENST00000531839	RP11-192H23.4	Uncharacterized protein [Source:UniProtKB/TrEMBL;Acc:E9PMD0]	-	26907029	26941203	6.86005	5.81594
ASHGA5P034850	0.0452839	0.110525	2.06042	up	noncoding	TCONS_00003566	XLOC_001341	LincRNAs identified by Cabili et al	380	chr2	+	10170630	10178720	CATGAAGAGCTAGCCCCTAGCATGACACTTGGCCTACTTTTGGTATTTAATAAACGTCTT	intergenic							5.47636	4.43342
ASHGA5P036958	0.0101665	0.0471794	2.05574	up	noncoding	TCONS_00025420	XLOC_012229	LincRNAs identified by Cabili et al	287	chr17	+	47315594	47316616	TCCTATCTGACTCCAGTCCCACTTGCTGGAGGAGTTCCCCTCATTTTGTTTCTGAGACAG	intergenic							5.70114	4.66149
ASHGA5P053557	0.0186609	0.0640863	2.0541	up	noncoding	NR_038446	LOC100130231	RefSeq	5338	chr8	-	126953375	126963441	ACAACTTTAGGTTGGTTTGCCTAAACTACTAGGTTCTCAATCTATATGAACCTCCTCCAG	intergenic							5.11991	4.08141
ASHGA5P022259	0.00815748	0.0438857	2.05198	up	noncoding	ENST00000553559	SNHG10	GENCODE	428	chr14	-	95999250	96001209	TGGCAATGCGATTCATTGATTCCAGGTAAATCAGAGGAACAAGCAACATGAACAGAAATA	natural antisense	ENST00000331334	GLRX5	glutaredoxin 5 [Source:HGNC Symbol;Acc:20134]	+	96000929	96011055	6.46535	5.42833
ASHGA5P019439	0.00702769	0.0422351	2.05002	up	noncoding	NR_033798	CAST	RefSeq	1809	chr5	+	96079243	96109116	CTTTATATTTGTGTGAGGACTTCTGCATCTTACAGTCAGCACAGAACACACTGAGACTTG	exon sense-overlapping	NM_001042440	CAST	calpastatin isoform f	+	95997906	96110385	6.07851	5.04287
ASHGA5P019439	0.00702769	0.0422351	2.05002	up	noncoding	NR_033798	CAST	RefSeq	1809	chr5	+	96079243	96109116	CTTTATATTTGTGTGAGGACTTCTGCATCTTACAGTCAGCACAGAACACACTGAGACTTG	exon sense-overlapping	NM_001190442	CAST	calpastatin isoform m	+	95997740	96110385	6.07851	5.04287
ASHGA5P019439	0.00702769	0.0422351	2.05002	up	noncoding	NR_033798	CAST	RefSeq	1809	chr5	+	96079243	96109116	CTTTATATTTGTGTGAGGACTTCTGCATCTTACAGTCAGCACAGAACACACTGAGACTTG	exon sense-overlapping	NM_173060	CAST	calpastatin isoform b	+	96038492	96110385	6.07851	5.04287
ASHGA5P019439	0.00702769	0.0422351	2.05002	up	noncoding	NR_033798	CAST	RefSeq	1809	chr5	+	96079243	96109116	CTTTATATTTGTGTGAGGACTTCTGCATCTTACAGTCAGCACAGAACACACTGAGACTTG	natural antisense	NM_016442	ERAP1	endoplasmic reticulum aminopeptidase 1 isoform a precursor	-	96096513	96143892	6.07851	5.04287
ASHGA5P035093	0.0066563	0.0416685	2.04817	up	noncoding	uc002sgb.1	PCBP1-AS1	UCSC_knowngene	2455	chr2	-	70257129	70313403	TGCCAATAGTTTTTCAAGTCAGCAATTACTGTGTGGATTATGTAATGGCTCGGTATTAAA	intergenic							7.00077	5.96643
ASHGA5P058063	0.0149935	0.0566851	2.04714	up	noncoding	TCONS_00026129	XLOC_012538	LincRNAs identified by Cabili et al	202	chr17	-	58160929	58165550	CAGGCAGAAGAGTTATCTTAAGGATCATCTTTCCCTAAGATCGTCATCCCTTCCTGGAGT	intergenic							5.06463	4.03102
ASHGA5P023179	0.0482668	0.114916	2.04678	up	noncoding	NR_027941	COX11	RefSeq	1138	chr17	-	53029258	53046064	TAGAAGAAAGATTAGAAAAATTTCAACTGTAGGTGCCTTTGCAACCTATCCTGGGAGACC	exon sense-overlapping	NM_001162861	COX11	cytochrome c oxidase assembly protein COX11, mitochondrial isoform 2	-	53038566	53046064	4.9778	3.94444
ASHGA5P023179	0.0482668	0.114916	2.04678	up	noncoding	NR_027941	COX11	RefSeq	1138	chr17	-	53029258	53046064	TAGAAGAAAGATTAGAAAAATTTCAACTGTAGGTGCCTTTGCAACCTATCCTGGGAGACC	exon sense-overlapping	NM_001162862	COX11	cytochrome c oxidase assembly protein COX11, mitochondrial isoform 3	-	53038566	53046064	4.9778	3.94444
ASHGA5P023179	0.0482668	0.114916	2.04678	up	noncoding	NR_027941	COX11	RefSeq	1138	chr17	-	53029258	53046064	TAGAAGAAAGATTAGAAAAATTTCAACTGTAGGTGCCTTTGCAACCTATCCTGGGAGACC	exon sense-overlapping	NM_004375	COX11	cytochrome c oxidase assembly protein COX11, mitochondrial isoform 1	-	53038566	53046064	4.9778	3.94444
ASHGA5P023179	0.0482668	0.114916	2.04678	up	noncoding	NR_027941	COX11	RefSeq	1138	chr17	-	53029258	53046064	TAGAAGAAAGATTAGAAAAATTTCAACTGTAGGTGCCTTTGCAACCTATCCTGGGAGACC	natural antisense	NM_005486	TOM1L1	TOM1-like protein 1	+	52978051	53039328	4.9778	3.94444
ASHGA5P027588	0.0433557	0.107444	2.04594	up	noncoding	uc001tsv.2	C12orf47	UCSC_knowngene	932	chr12	-	112277572	112279710	ACCTACACTGCATTCCTCAAAGTAAAATTTAAGTGTGGCTCTGTGCCTATGCTCTCCCCA	bidirectional	NM_003668	MAPKAPK5	MAP kinase-activated protein kinase 5 isoform 1	+	112280278	112331228	5.60316	4.5704
ASHGA5P027588	0.0433557	0.107444	2.04594	up	noncoding	uc001tsv.2	C12orf47	UCSC_knowngene	932	chr12	-	112277572	112279710	ACCTACACTGCATTCCTCAAAGTAAAATTTAAGTGTGGCTCTGTGCCTATGCTCTCCCCA	bidirectional	NM_139078	MAPKAPK5	MAP kinase-activated protein kinase 5 isoform 2	+	112280278	112331228	5.60316	4.5704
ASHGA5P050448	0.00826783	0.044007	2.04389	up	noncoding	ENST00000418854	AC007254.3	GENCODE	545	chr2	+	40146832	40332461	AAGCTGTTTGGTGAGTACAATGTTAATATAGAGACAATCAGAATGGTGTGTGCTTTTGTA	intergenic							4.10618	3.07485
ASHGA5P019973	3.39227e-05	0.00861233	2.04098	up	noncoding	ENST00000506086	RP11-229C3.2	GENCODE	479	chr5	-	74343857	74348668	ACGGTGCTAGAACAACAAACCAGAAGATTAACAGAGTTGGGGCTAATATAATGCGTTTAA	intergenic							4.14175	3.11248
ASHGA5P014676	0.0315217	0.0874701	2.0387	up	noncoding	ENST00000412393	LINC00342	GENCODE	654	chr2	-	96472865	96480524	TCTTTGGGGATTCCAGGAACAAAGATCACCACAACTGGCTCCCCTTCAACTATGTTAGAT	intergenic							6.34452	5.31687
ASHGA5P019357	0.00733702	0.0427228	2.03633	up	noncoding	NR_026598	NENF	RefSeq	934	chr1	+	212606228	212619721	CGGGGAGGAGAGTTTTATGGACGAGGAGCCCCCTACAATGCCTTGACGGGGAAGGACTCC	exon sense-overlapping	NM_013349	NENF	neudesin precursor	+	212606228	212619721	6.70892	5.68295
ASHGA5P015819	0.0308813	0.0864207	2.03371	up	noncoding	ENST00000463325	AC002055.4	GENCODE	528	chr22	+	51222202	51227382	ACATTTAGGAGGAACAGTAAGAGGACCTTGTGCATGAATAATTTGTTTCCACACTACAGA	bidirectional	NM_001003789	RABL2B	rab-like protein 2B isoform 1	-	51205919	51222087	5.24085	4.21674
ASHGA5P015819	0.0308813	0.0864207	2.03371	up	noncoding	ENST00000463325	AC002055.4	GENCODE	528	chr22	+	51222202	51227382	ACATTTAGGAGGAACAGTAAGAGGACCTTGTGCATGAATAATTTGTTTCCACACTACAGA	bidirectional	NM_001130919	RABL2B	rab-like protein 2B isoform 1	-	51205919	51222087	5.24085	4.21674
ASHGA5P015819	0.0308813	0.0864207	2.03371	up	noncoding	ENST00000463325	AC002055.4	GENCODE	528	chr22	+	51222202	51227382	ACATTTAGGAGGAACAGTAAGAGGACCTTGTGCATGAATAATTTGTTTCCACACTACAGA	bidirectional	NM_001130920	RABL2B	rab-like protein 2B isoform 1	-	51205919	51222087	5.24085	4.21674
ASHGA5P015819	0.0308813	0.0864207	2.03371	up	noncoding	ENST00000463325	AC002055.4	GENCODE	528	chr22	+	51222202	51227382	ACATTTAGGAGGAACAGTAAGAGGACCTTGTGCATGAATAATTTGTTTCCACACTACAGA	bidirectional	NM_001130921	RABL2B	rab-like protein 2B isoform 1	-	51205919	51222087	5.24085	4.21674
ASHGA5P015819	0.0308813	0.0864207	2.03371	up	noncoding	ENST00000463325	AC002055.4	GENCODE	528	chr22	+	51222202	51227382	ACATTTAGGAGGAACAGTAAGAGGACCTTGTGCATGAATAATTTGTTTCCACACTACAGA	bidirectional	NM_001130922	RABL2B	rab-like protein 2B isoform 2	-	51205919	51222087	5.24085	4.21674
ASHGA5P015819	0.0308813	0.0864207	2.03371	up	noncoding	ENST00000463325	AC002055.4	GENCODE	528	chr22	+	51222202	51227382	ACATTTAGGAGGAACAGTAAGAGGACCTTGTGCATGAATAATTTGTTTCCACACTACAGA	bidirectional	NM_001130923	RABL2B	rab-like protein 2B isoform 3	-	51205919	51222087	5.24085	4.21674
ASHGA5P015819	0.0308813	0.0864207	2.03371	up	noncoding	ENST00000463325	AC002055.4	GENCODE	528	chr22	+	51222202	51227382	ACATTTAGGAGGAACAGTAAGAGGACCTTGTGCATGAATAATTTGTTTCCACACTACAGA	bidirectional	NM_007081	RABL2B	rab-like protein 2B isoform 2	-	51205919	51222087	5.24085	4.21674
ASHGA5P023406	0.0309495	0.0865328	2.03243	up	noncoding	ENST00000580270	RP11-1096G20.5	GENCODE	463	chr17	-	11857205	11880911	CTTTATCTCAGTGCCTACTCAGCTGTGAATCCTCTGAAGTTCATTTTTTCATATCAATAT	exon sense-overlapping	NM_144680	ZNF18	zinc finger protein 18	-	11880761	11900689	6.51562	5.49241
ASHGA5P023406	0.0309495	0.0865328	2.03243	up	noncoding	ENST00000580270	RP11-1096G20.5	GENCODE	463	chr17	-	11857205	11880911	CTTTATCTCAGTGCCTACTCAGCTGTGAATCCTCTGAAGTTCATTTTTTCATATCAATAT	intronic antisense	NM_001372	DNAH9	dynein heavy chain 9, axonemal isoform 2	+	11501747	11873065	6.51562	5.49241
ASHGA5P023406	0.0309495	0.0865328	2.03243	up	noncoding	ENST00000580270	RP11-1096G20.5	GENCODE	463	chr17	-	11857205	11880911	CTTTATCTCAGTGCCTACTCAGCTGTGAATCCTCTGAAGTTCATTTTTTCATATCAATAT	intronic antisense	NM_004662	DNAH9	dynein heavy chain 9, axonemal isoform 1	+	11786218	11873065	6.51562	5.49241
ASHGA5P051300	0.031303	0.0871776	2.03113	up	noncoding	ENST00000423311	CTA-714B7.5	GENCODE	648	chr22	-	35515816	35627049	CACCTTCACGATGTTTCTCTTGGTCAAAAACACACTCAAGTCGTCTCCAAGTTCGAAGCA	intergenic							7.35589	6.3336
ASHGA5P037456	0.0315664	0.087541	2.02695	up	noncoding	NR_038883	LINC00649	RefSeq	2567	chr21	+	35303515	35343487	TCTGTCACCTCTTTCTAAAAGCTGGGAAATGGTTATTGTCAACGCCAGCCCCATTTTGGA	intergenic							5.87631	4.857
ASHGA5P038475	0.0188257	0.0643886	2.02218	up	noncoding	NR_034032	LOC100289361	RefSeq	640	chr3	-	142719686	142720309	GGAGACAGTCAATAAGAGAAAATCGTAAATACAGATGGTATTCTAAATCTAGCATGCATG	natural antisense	ENST00000473835	U2SURP	U2 snRNP-associated SURP domain containing [Source:HGNC Symbol;Acc:30855]	+	142720180	142779388	5.17071	4.1548
ASHGA5P017547	0.0121159	0.0508206	2.02121	up	noncoding	ENST00000442967	AC017096.1	GENCODE	560	chr2	+	200322422	200324615	TTATTAGTTGCGTTGAGTCATCAGGCAAAGACCCCGAGGGCTCTCCCACATCTCCCGCAG	intronic antisense	NM_001172517	SATB2	DNA-binding protein SATB2	-	200134222	200329831	5.05751	4.04229
ASHGA5P017547	0.0121159	0.0508206	2.02121	up	noncoding	ENST00000442967	AC017096.1	GENCODE	560	chr2	+	200322422	200324615	TTATTAGTTGCGTTGAGTCATCAGGCAAAGACCCCGAGGGCTCTCCCACATCTCCCGCAG	intronic antisense	NM_015265	SATB2	DNA-binding protein SATB2	-	200134222	200335989	5.05751	4.04229
ASHGA5P017547	0.0121159	0.0508206	2.02121	up	noncoding	ENST00000442967	AC017096.1	GENCODE	560	chr2	+	200322422	200324615	TTATTAGTTGCGTTGAGTCATCAGGCAAAGACCCCGAGGGCTCTCCCACATCTCCCGCAG	natural antisense	NM_001172509	SATB2	DNA-binding protein SATB2	-	200134222	200322819	5.05751	4.04229
ASHGA5P027953	0.0022854	0.0320756	2.02072	up	noncoding	ENST00000550684	RP5-1057I20.2	GENCODE	343	chr12	+	48220636	48228304	CCCTGAGAAGGTCTTGGCCTGAAGACACTCACCTCTCTTTCCCCAGGAGTGTCTTTTAGG	intronic antisense	ENST00000434070	HDAC7	histone deacetylase 7 [Source:HGNC Symbol;Acc:14067]	-	48191166	48226915	6.33192	5.31704
ASHGA5P032388	0.0109728	0.0488084	2.02059	up	noncoding	ENST00000581080	CTD-2267D19.2	GENCODE	1790	chr17	-	38497118	38499388	GGCTATGTGGGTTGTCCAAGATCACATTACTAATAATAAAGAGTAGAGCAGGTATTTGAA	intronic antisense	NM_000964	RARA	retinoic acid receptor alpha isoform 1	+	38465422	38513895	5.03576	4.02098
ASHGA5P032388	0.0109728	0.0488084	2.02059	up	noncoding	ENST00000581080	CTD-2267D19.2	GENCODE	1790	chr17	-	38497118	38499388	GGCTATGTGGGTTGTCCAAGATCACATTACTAATAATAAAGAGTAGAGCAGGTATTTGAA	intronic antisense	NM_001145301	RARA	retinoic acid receptor alpha isoform 1	+	38474472	38513895	5.03576	4.02098
ASHGA5P032388	0.0109728	0.0488084	2.02059	up	noncoding	ENST00000581080	CTD-2267D19.2	GENCODE	1790	chr17	-	38497118	38499388	GGCTATGTGGGTTGTCCAAGATCACATTACTAATAATAAAGAGTAGAGCAGGTATTTGAA	intronic antisense	NM_001145302	RARA	retinoic acid receptor alpha isoform 4	+	38474472	38513895	5.03576	4.02098
ASHGA5P032388	0.0109728	0.0488084	2.02059	up	noncoding	ENST00000581080	CTD-2267D19.2	GENCODE	1790	chr17	-	38497118	38499388	GGCTATGTGGGTTGTCCAAGATCACATTACTAATAATAAAGAGTAGAGCAGGTATTTGAA	natural antisense	NM_001024809	RARA	retinoic acid receptor alpha isoform 2	+	38498270	38513895	5.03576	4.02098
ASHGA5P058420	0.00751927	0.0429609	2.01959	up	noncoding	uc003iie.3	LOC100129858	UCSC_knowngene	199	chr4	-	141281970	141290504	TCTGAATTTGTATCTTAAGGGAAATACTACAAAATGTCGCAGAAGGTGCTGGATGGATAT	intronic antisense	NM_001153446	SCOC	short coiled-coil protein isoform 4	+	141264596	141303710	5.5159	4.50183
ASHGA5P058420	0.00751927	0.0429609	2.01959	up	noncoding	uc003iie.3	LOC100129858	UCSC_knowngene	199	chr4	-	141281970	141290504	TCTGAATTTGTATCTTAAGGGAAATACTACAAAATGTCGCAGAAGGTGCTGGATGGATAT	intronic antisense	NM_001153585	SCOC	short coiled-coil protein isoform 4	+	141264614	141303710	5.5159	4.50183
ASHGA5P058420	0.00751927	0.0429609	2.01959	up	noncoding	uc003iie.3	LOC100129858	UCSC_knowngene	199	chr4	-	141281970	141290504	TCTGAATTTGTATCTTAAGGGAAATACTACAAAATGTCGCAGAAGGTGCTGGATGGATAT	intronic antisense	NM_001153635	SCOC	short coiled-coil protein isoform 5	+	141264596	141303710	5.5159	4.50183
ASHGA5P058420	0.00751927	0.0429609	2.01959	up	noncoding	uc003iie.3	LOC100129858	UCSC_knowngene	199	chr4	-	141281970	141290504	TCTGAATTTGTATCTTAAGGGAAATACTACAAAATGTCGCAGAAGGTGCTGGATGGATAT	intronic antisense	NM_001153690	SCOC	short coiled-coil protein isoform 6	+	141264614	141303710	5.5159	4.50183
ASHGA5P058420	0.00751927	0.0429609	2.01959	up	noncoding	uc003iie.3	LOC100129858	UCSC_knowngene	199	chr4	-	141281970	141290504	TCTGAATTTGTATCTTAAGGGAAATACTACAAAATGTCGCAGAAGGTGCTGGATGGATAT	intronic antisense	NM_032547	SCOC	short coiled-coil protein isoform 4	+	141178439	141303710	5.5159	4.50183
ASHGA5P055595	0.00748929	0.0429203	2.01817	up	noncoding	ENST00000535249	RP11-169K16.9	GENCODE	1796	chr1	-	16160559	16162355	ATTGACCCAGTAGAATCTATTGTGTGCGTTCCAGCGTCATTTCAAAGAGCTATTGTTTTT	intergenic							5.84743	4.83437
ASHGA5P038691	0.0274821	0.0804656	2.01618	up	noncoding	ENST00000430621	AC034193.5	GENCODE	683	chr3	+	10045951	10048674	GAGCCTGCAGCACTTTCCTGCAAAGCTCTATTTTATCTTTTTAAATAAAAATGGTTACTG	natural antisense	NM_001008737	LOC401052	uncharacterized protein LOC401052	-	10048101	10052779	5.33782	4.3262
ASHGA5P026733	0.0253421	0.0764653	2.01594	up	noncoding	ENST00000501356	RP11-712B9.2	GENCODE	1926	chr11	+	94883702	94892312	GCTGCTGCTTTAAAACAGCACTTTCCATTTGCCTTGTTAAATGGGATTGTATATGAATTA	intergenic							6.32468	5.31322
ASHGA5P044359	0.0114464	0.0494106	2.01489	up	noncoding	TCONS_00002272	XLOC_000647	LincRNAs identified by Cabili et al	1073	chr1	+	247496211	247556671	ACTGTTCACCTTTTGAGGCACAAAACGGGCTGTTTATGCTGCTGCTGCATTTAGCTCAAA	intergenic							6.95943	5.94872
ASHGA5P044032	0.0373493	0.0979159	2.00758	up	noncoding	NR_028090	LOC202781	RefSeq	2275	chr7	+	154795142	154797413	CTATGTTGGGCATATATCAGTGTAATAAATACATTAGATCCAAATACAGATCATGCTGCC	bidirectional	NM_007349	PAXIP1	PAX-interacting protein 1	-	154735399	154794682	7.03447	6.02902
ASHGA5P018142	0.00807952	0.0437937	2.00729	up	noncoding	NR_037904	UBE2F-SCLY	RefSeq	2972	chr2	+	238875586	239008054	ATTGTTTTCAGCTAACAGTAACCCCAGTTTATTGAGAGAACATTCAATTGATGGCACTGG	exon sense-overlapping	NM_016510	SCLY	selenocysteine lyase	+	238969564	239008054	4.12499	3.11974
ASHGA5P018142	0.00807952	0.0437937	2.00729	up	noncoding	NR_037904	UBE2F-SCLY	RefSeq	2972	chr2	+	238875586	239008054	ATTGTTTTCAGCTAACAGTAACCCCAGTTTATTGAGAGAACATTCAATTGATGGCACTGG	exon sense-overlapping	NM_080678	UBE2F	NEDD8-conjugating enzyme UBE2F isoform 1	+	238875586	238951423	4.12499	3.11974
ASHGA5P056040	0.0106125	0.0480165	2.00527	up	noncoding	ENST00000555377	RP11-72M17.1	GENCODE	286	chr14	-	66961361	66963052	ATAAAATAGATCTCAGGCTTATGTATTTTTCTAGAACATTAAAATCTTGTTTTTTGTGTA	intergenic							5.11429	4.1105
ASHGA5P021288	0.0161292	0.0591883	2.00196	up	noncoding	ENST00000529537	HERC2P9	GENCODE	754	chr15	+	28857287	28878420	TCTGTTACAGATGATAGTGTCGAACCAAGTGGGACAAAGAAAGATCTGAATGACAAAGAG	intergenic							5.76008	4.75866
ASHGA5P013216	0.00506062	0.0393878	2.00081	up	noncoding	ENST00000390681	PRSS30P	GENCODE	2881	chr16	-	2889568	2892745	CCATCCTGCTTCTGCTGCTGTGGCTGCTGCCAGGGGCCCATTGGGATGTGCTGCCTTCAG	intergenic							8.76351	7.76293
