# Supplementary material for: Age and poverty status alter the coding and noncoding transcriptome
Source: Aging (Albany NY). 2019 Feb 17;11(4):1189–203. doi: 10.18632/aging.101823 (PMC6402526; doi:10.18632/aging.101823)
Supplement: Supplementary Table 4 [file aging-11-101823-s005.xlsx]

## Sheet: down AP vs. BP
Supplementary Table 4. lncRNAs significantly lower in abundance in white males living above poverty.
ProbeName	P-value	FDR	Fold Change	Regulation	type	seqname	GeneSymbol	source	RNAlength	chrom	strand	txStart	txEnd	Sequence	relationship	Associated_gene_acc	Associated_gene_name	Associated_protein_name	Associated_gene_strand	Associated_gene_start	Associated_gene_end	group-AP(normalized)	group-BP(normalized)
ASHGA5P028976	0.00276686	0.0343967	9.82409	down	noncoding	uc001vvr.1	AK022914	UCSC_knowngene	4651	chr14	-	19880208	19925333	AAGAAAAACTACTTGCTGCCCTTACTTGAAGCTCAATTATTTAAAACAAAGAAAAAATAG	intergenic							4.3045	7.60083
ASHGA5P030285	0.0390673	0.100766	9.40535	down	noncoding	NR_034095	LOC400456	RefSeq	1445	chr15	-	95822518	95870329	CCAGTCCTCCATTCCATTCCCTAATTTGTATGCAATGGCATTTAACATTTTGACTTTGCT	intergenic							9.49424	12.7277
ASHGA5P000205	0.0359644	0.09546	8.8808	down	noncoding	chr10:7584675-7594825-	chr10:7584675-7594825	LincRNAs identified by Khalil et al	10150	chr10	-	7544669	7554819	TATTTCTTTCTTCCTTTCTGTGACAACGGACAAGTTGCCCTTATCCCTCTGAGGAAGCTG	intergenic							4.16544	7.31612
ASHGA5P048985	0.00618014	0.0409096	8.80869	down	noncoding	ENST00000566287	LA16c-390E6.5	GENCODE	1124	chr16	+	1495343	1496520	CACACACACACAGCTGATCCCTGGAGGTAAAGAAACCTAGACGAGGAGAGTGGAGGCTGG	natural antisense	NM_001114331	CLCN7	H(+)/Cl(-) exchange transporter 7 isoform b	-	1494933	1525085	6.12015	9.25908
ASHGA5P048985	0.00618014	0.0409096	8.80869	down	noncoding	ENST00000566287	LA16c-390E6.5	GENCODE	1124	chr16	+	1495343	1496520	CACACACACACAGCTGATCCCTGGAGGTAAAGAAACCTAGACGAGGAGAGTGGAGGCTGG	natural antisense	NM_001287	CLCN7	H(+)/Cl(-) exchange transporter 7 isoform a	-	1494933	1525085	6.12015	9.25908
ASHGA5P036605	0.00289115	0.0349556	8.41909	down	noncoding	ENST00000373226	RP11-435D7.3	GENCODE	539	chr1	+	36204989	36209177	TTCCTCCTCCTCGTCTTCCTCTTCCCTAAAATGTAAATCAATGAATCAATAAATAAGTTG	natural antisense	NM_001190481	CLSPN	claspin isoform 2	-	36197712	36235551	8.8171	11.8908
ASHGA5P036605	0.00289115	0.0349556	8.41909	down	noncoding	ENST00000373226	RP11-435D7.3	GENCODE	539	chr1	+	36204989	36209177	TTCCTCCTCCTCGTCTTCCTCTTCCCTAAAATGTAAATCAATGAATCAATAAATAAGTTG	natural antisense	NM_022111	CLSPN	claspin isoform 1	-	36197712	36235551	8.8171	11.8908
ASHGA5P052148	0.048128	0.114763	8.38878	down	noncoding	ENST00000507869	AC108142.1	GENCODE	2129	chr4	-	182896308	183006289	CTTCCTCTTCCTCTTTCTTTATGGATGGCAAACAGCGTTCAGATGACAGATTTTGGAAAA	intergenic							7.03993	10.1084
ASHGA5P037139	0.0381764	0.0992178	8.22225	down	noncoding	uc002xzq.1	BC007940	UCSC_knowngene	1617	chr20	+	57329405	57331891	CCTTCCTCTTCCTGTCTGTTTTAAGCAGTTGTGGCTTTGCCAAAAATAAAAATAATTTCT	intergenic							6.61433	9.65386
ASHGA5P055745	0.000984636	0.0257564	8.1652	down	noncoding	ENST00000447147	LINC00426	GENCODE	1589	chr13	-	30914406	30948036	TCCTTGTCATATCGAGATGGCTTTTCCTCCTCCTCTTCAAACATCTTTTAGCAGCAACAG	intergenic							5.65566	8.68515
ASHGA5P032282	0.0165838	0.0602043	8.13956	down	noncoding	ENST00000583179	RP11-19P22.5	GENCODE	2110	chr17	-	25988574	25990684	CTGTTCCACTTCCTCTCCTTCCTCATTGAACTCTTTCACTAAAAGGAGAGTGCAAGAGAG	intergenic							7.67155	10.6965
ASHGA5P036169	0.0159542	0.058822	8.01391	down	noncoding	ENST00000446492	AC093391.2	GENCODE	488	chr2	+	136743043	136756701	GAGGGTGTGTGTGGTATTCTACATTCAGTAGGGATTTATAAATGAGGATGATATCACTCA	natural antisense	NM_001349	DARS	aspartate--tRNA ligase, cytoplasmic	-	136664253	136743222	4.40818	7.41069
ASHGA5P057400	0.0316557	0.0877094	8.01261	down	noncoding	TCONS_00016773	XLOC_007703	LincRNAs identified by Cabili et al	262	chr9	-	65734492	65782030	TCTCTCTTCTTCAATAGCTGCTTACGAAATAAAAACATCAGTAGGAGGGGAAGGAGGAAG	intergenic							3.89633	6.8986
ASHGA5P042150	0.00489304	0.0391245	7.70234	down	noncoding	ENST00000522287	OSTCP1	GENCODE	1195	chr6	-	159262148	159278664	AACACCTTTTGGAGATGGCGTTTCTGTTTTCAGAAATTAACGTAAAATCAAGAAGCAAGA	intergenic							3.15781	6.10311
ASHGA5P032222	0.0246878	0.0753795	7.55821	down	noncoding	ENST00000456090	SMCR2	GENCODE	564	chr17	-	17577339	17581002	AGAGACCCTTGGGCTTCCTTCCTTCAAGGCCTCTGGTCTCTAGCAGAGAGAAGAGAGGGA	intergenic							6.11719	9.03524
ASHGA5P044923	0.00827548	0.044007	7.38404	down	noncoding	ENST00000520562	RP11-10N23.2	GENCODE	939	chr8	+	94731801	94733395	CCCATCTCATCTCTAATATAGAAGTGAAAAAAGCCATGTAATCCCACATATAACAAGAGT	intron sense-overlapping	NM_145269	FAM92A1	protein FAM92A1	+	94712772	94740671	3.24249	6.1269
ASHGA5P049823	0.0240505	0.0740218	7.27272	down	noncoding	ENST00000420427	AC004562.1	GENCODE	665	chr17	+	67957902	67979679	TTTTCTTCCTTCCATGATATAGATATATTGATCATGAGGAGAGGGCTCACCCCTCACCCG	intergenic							5.14652	8.00901
ASHGA5P041505	0.0268296	0.0790728	7.25808	down	noncoding	ENST00000523301	RP11-175K6.1	GENCODE	568	chr5	+	158527629	158534225	ATTATTTCCCTTTCTCTCTCTTCAATGTTCCCTTATCCTGAGTATTGAGGTCCCCAAACG	bidirectional	NM_024007	EBF1	transcription factor COE1	-	158122922	158526788	5.61793	8.47752
ASHGA5P038729	0.0194538	0.0658538	7.21429	down	noncoding	ENST00000414382	AC098973.2	GENCODE	543	chr3	+	27862978	27932792	GTTCTCTTCTCTCTGACATTCAGTTTTTTATTTGTTAAAAGAGGGAAACAATTCTAGGGC	intergenic							3.4234	6.27425
ASHGA5P047574	0.0393715	0.101268	7.17428	down	noncoding	uc001kfc.1	AK130076	UCSC_knowngene	1770	chr10	+	89706924	89708694	CAGGGGTGTGTGTGTGTAGTTAAAGATCAATTTAACTTAAAAGGTCTTGGTTAGAGAATA	intron sense-overlapping	NM_000314	PTEN	phosphatidylinositol 3,4,5-trisphosphate 3-phosphatase and dual-specificity protein phosphatase PTEN	+	89623194	89728532	7.16706	10.0099
ASHGA5P044574	0.0113409	0.049251	6.9612	down	noncoding	ENST00000433391	RP11-378J18.5	GENCODE	1302	chr1	+	222817656	222856105	GAGAGGTCAGTCCTTATGTTGCCTTGGTGCTTTGAAAATTAAATGTCATGAACAAAGAGT	intron sense-overlapping	NM_198551	MIA3	melanoma inhibitory activity protein 3 precursor	+	222791443	222841351	3.53329	6.33263
ASHGA5P044574	0.0113409	0.049251	6.9612	down	noncoding	ENST00000433391	RP11-378J18.5	GENCODE	1302	chr1	+	222817656	222856105	GAGAGGTCAGTCCTTATGTTGCCTTGGTGCTTTGAAAATTAAATGTCATGAACAAAGAGT	intronic antisense	NM_022831	AIDA	axin interactor, dorsalization-associated protein	-	222841354	222885864	3.53329	6.33263
ASHGA5P031365	0.0396972	0.101821	6.90793	down	noncoding	ENST00000568458	RP11-558A11.3	GENCODE	469	chr16	-	84376069	84377013	AGTCCCAAAAGCCTTGCTTCCTTCCTTTCTCCTGGATAACCCACCTCTGCCTGCCACAGA	intergenic							7.39045	10.1787
ASHGA5P027927	0.0356796	0.0949499	6.89783	down	noncoding	TCONS_00012060	XLOC_005590	LincRNAs identified by Cabili et al	232	chr6	-	4399912	4401474	ATTTTTGCCAATTCCCTTCCTTTCCTTCTTCTTTCCTATGAAGGGGGAAGAGGCTGGCAT	intergenic							8.3966	11.1827
ASHGA5P026034	0.0113337	0.049251	6.85992	down	noncoding	ENST00000525429	RP11-687M24.4	GENCODE	593	chr11	-	125002742	125009483	CCACAATTCTCTCTCTCCTTAATTTAAAGAAATATAGAGGAGCATGTTTGAAGGAGCATA	intergenic							4.86282	7.64101
ASHGA5P048131	0.0195131	0.0659025	6.82415	down	noncoding	TCONS_00014014	XLOC_006661	LincRNAs identified by Cabili et al	334	chr7	-	155000027	155000985	GAAATCCACCCTTCTTCCTTTGTTCTTTCTTCCTCCTTTGAAAGTGTCCCCATGGAGAAG	intergenic							7.26906	10.0397
ASHGA5P033988	0.000420376	0.0180833	6.82231	down	noncoding	ENST00000419160	RP4-669L17.10	GENCODE	547	chr1	+	322731	324955	ACTGTGAGTCATGGTGAATGGACATTCTCCTTACCCTTGATGTAAATTGACAGGGTTTTG	intergenic							2.86941	5.63967
ASHGA5P057372	0.0241012	0.0740834	6.76852	down	noncoding	TCONS_00016406	XLOC_007777	LincRNAs identified by Cabili et al	698	chr9	-	94246564	94249578	TTTCTCTCTCTCTGATCCAAAATGACTGCTGCATCAGTAAACACTTGGGAGTGAAGCAGG	intergenic							6.63836	9.39719
ASHGA5P036386	0.0479891	0.114669	6.76242	down	noncoding	ENST00000435643	AC007879.1	GENCODE	554	chr2	+	208038357	208087514	CTTCCTTCTAACTCAGGTGATCTATTGCTTAACAAAAATTCACCTACCATCATGATAAAG	intergenic							3.26144	6.01898
ASHGA5P047138	0.00449473	0.0386604	6.70602	down	noncoding	AI161328		LincRNAs identified by Khalil et al	412	chr2	-	174830570	174830982	TTTTTTGCTTTAAATGCCTGCCTTCAGGGTACGTGAAAGTGGGAGACCGGTTGGAAAACT	intergenic							3.42509	6.17055
ASHGA5P028035	0.0277776	0.0809791	6.62176	down	noncoding	ENST00000562848	AC012531.25	GENCODE	2680	chr12	+	54413693	54416373	TCTCTCTCTTTTTGCCAGCACAGATTAAATGGTTCTTTCAGATCTGCAAACAATAAAGGA	intron sense-overlapping	NM_014620	HOXC4	homeobox protein Hox-C4	+	54410641	54449814	4.64276	7.36997
ASHGA5P028035	0.0277776	0.0809791	6.62176	down	noncoding	ENST00000562848	AC012531.25	GENCODE	2680	chr12	+	54413693	54416373	TCTCTCTCTTTTTGCCAGCACAGATTAAATGGTTCTTTCAGATCTGCAAACAATAAAGGA	intron sense-overlapping	NM_153693	HOXC6	homeobox protein Hox-C6 isoform 2	+	54410641	54424607	4.64276	7.36997
ASHGA5P046506	0.00265549	0.03424	6.47406	down	noncoding	ENST00000435394	RP11-245M24.1	GENCODE	2214	chrX	+	45364632	45382889	GCCAGTCCCTCACATGTTGGGGTTCACTAATATCTTCTTCTCTTCTTTCTTATGAGTCTT	intergenic							4.91058	7.60525
ASHGA5P030123	0.00808617	0.0437937	6.4691	down	noncoding	ENST00000561316	RP11-19J5.2	GENCODE	547	chr15	-	70113094	70115195	AAGGAAGCTGCTGAGGGAAGAGACATTTTCCCAAGTCAGATCCATCCATCCATCCATTCA	intergenic							6.2895	8.98306
ASHGA5P029148	0.00389158	0.0375752	6.41316	down	noncoding	ENST00000554196	LINC00520	GENCODE	514	chr14	-	56254644	56260078	GCAGGTTCTGCTTAGAGGATTGGTGTGAAAATAAGGTTATTATTTGACATATTGAGTTGA	intergenic							3.20745	5.88849
ASHGA5P055489	0.0304065	0.0856379	6.38698	down	noncoding	TCONS_00029007	XLOC_013931	LincRNAs identified by Cabili et al	1493	chr21	+	37477279	37481023	TGTGTGTGTGCATGAATGATCACAAATAACCCTACCTGCGGTGTTGTTCATGTGGATGGT	intergenic							4.93605	7.61119
ASHGA5P036477	0.0331899	0.0904386	6.35374	down	noncoding	uc002vms.1	AX747413	UCSC_knowngene	1949	chr2	+	222437225	222439174	GGGGATATATGTATGTGTGTGTGCGTGCATAAATTATTTAAAATAACTGCACTAAATCCC	natural antisense	ENST00000409938	EPHA4	EPH receptor A4 [Source:HGNC Symbol;Acc:3388]	-	222290620	222438922	5.54718	8.21478
ASHGA5P036477	0.0331899	0.0904386	6.35374	down	noncoding	uc002vms.1	AX747413	UCSC_knowngene	1949	chr2	+	222437225	222439174	GGGGATATATGTATGTGTGTGTGCGTGCATAAATTATTTAAAATAACTGCACTAAATCCC	natural antisense	ENST00000434266	EPHA4	EPH receptor A4 [Source:HGNC Symbol;Acc:3388]	-	222428998	222438878	5.54718	8.21478
ASHGA5P043539	0.0389193	0.100469	6.29578	down	noncoding	ENST00000452700	AC003986.5	GENCODE	1526	chr7	+	19183915	19185876	TTCCTTTCCCTACCTTTACCTCCTACTCATATAAAATAGAGGATTTTATTCCAAGAGGAA	natural antisense	NM_152898	FERD3L	fer3-like protein	-	19184404	19185044	5.45116	8.10555
ASHGA5P027688	0.0279651	0.0812433	6.29375	down	noncoding	ENST00000541797	RP11-749H20.1	GENCODE	462	chr12	-	128278071	128305728	CTACCTCTTCTCTCTCTACTTGAAATTCAAGCAAGACCTTGGAGAATACAGGTGGAGCTG	intergenic							5.43082	8.08474
ASHGA5P053345	0.0270115	0.0795252	6.29243	down	noncoding	ENST00000496192	OR6W1P	GENCODE	1100	chr7	-	142759426	142760526	AAAGGTCTCTGGTTTTCCTAGGCAGAGGAGCTCCTTGGATTTTCTTATCTCCATGAGTTC	intergenic							5.78228	8.4359
ASHGA5P036552	0.00646215	0.0410665	6.29068	down	noncoding	ENST00000413353	AC019068.2	GENCODE	489	chr2	+	237299716	237301031	CCAAGACTCATCTTTTTTCATCCAGATTTCTACACTCCAGAAGGGTAAAGAAAAAGAAAA	natural antisense	NM_001270584	IQCA1	IQ and AAA domain-containing protein 1 isoform 2	-	237232789	237416178	3.57224	6.22546
ASHGA5P036552	0.00646215	0.0410665	6.29068	down	noncoding	ENST00000413353	AC019068.2	GENCODE	489	chr2	+	237299716	237301031	CCAAGACTCATCTTTTTTCATCCAGATTTCTACACTCCAGAAGGGTAAAGAAAAAGAAAA	natural antisense	NM_001270585	IQCA1	IQ and AAA domain-containing protein 1 isoform 3	-	237232789	237412340	3.57224	6.22546
ASHGA5P036552	0.00646215	0.0410665	6.29068	down	noncoding	ENST00000413353	AC019068.2	GENCODE	489	chr2	+	237299716	237301031	CCAAGACTCATCTTTTTTCATCCAGATTTCTACACTCCAGAAGGGTAAAGAAAAAGAAAA	natural antisense	NM_024726	IQCA1	IQ and AAA domain-containing protein 1 isoform 1	-	237232789	237416178	3.57224	6.22546
ASHGA5P021259	0.00475231	0.0390427	6.23744	down	noncoding	ENST00000528872	RP1-296L11.1	GENCODE	576	chr11	+	31327231	31336095	AAAGCAAGAGAGTTTCTGATTGCCCGGGTTGAAGTGTATCTCATATTTCCCACAGTGTAA	natural antisense	NM_181807	DCDC1	doublecortin domain-containing protein 1	-	31284170	31391357	3.15555	5.7965
ASHGA5P051396	0.0444333	0.109288	6.07829	down	noncoding	NR_037807	IL17RC	RefSeq	2618	chr3	+	9958757	9975305	CAACCTCCTTCCTTTATTTGTTCCACAGACTGGACCGCAGATCATTACCTTGAACCACAC	exon sense-overlapping	NM_001203263	IL17RC	interleukin-17 receptor C isoform 4 precursor	+	9958757	9975305	5.34368	7.94735
ASHGA5P051396	0.0444333	0.109288	6.07829	down	noncoding	NR_037807	IL17RC	RefSeq	2618	chr3	+	9958757	9975305	CAACCTCCTTCCTTTATTTGTTCCACAGACTGGACCGCAGATCATTACCTTGAACCACAC	exon sense-overlapping	NM_001203264	IL17RC	interleukin-17 receptor C isoform 5 precursor	+	9958757	9975305	5.34368	7.94735
ASHGA5P051396	0.0444333	0.109288	6.07829	down	noncoding	NR_037807	IL17RC	RefSeq	2618	chr3	+	9958757	9975305	CAACCTCCTTCCTTTATTTGTTCCACAGACTGGACCGCAGATCATTACCTTGAACCACAC	exon sense-overlapping	NM_001203265	IL17RC	interleukin-17 receptor C isoform 6 precursor	+	9958757	9975305	5.34368	7.94735
ASHGA5P051396	0.0444333	0.109288	6.07829	down	noncoding	NR_037807	IL17RC	RefSeq	2618	chr3	+	9958757	9975305	CAACCTCCTTCCTTTATTTGTTCCACAGACTGGACCGCAGATCATTACCTTGAACCACAC	exon sense-overlapping	NM_032732	IL17RC	interleukin-17 receptor C isoform 3 precursor	+	9958757	9975305	5.34368	7.94735
ASHGA5P051396	0.0444333	0.109288	6.07829	down	noncoding	NR_037807	IL17RC	RefSeq	2618	chr3	+	9958757	9975305	CAACCTCCTTCCTTTATTTGTTCCACAGACTGGACCGCAGATCATTACCTTGAACCACAC	exon sense-overlapping	NM_153460	IL17RC	interleukin-17 receptor C isoform 1 precursor	+	9958757	9975305	5.34368	7.94735
ASHGA5P051396	0.0444333	0.109288	6.07829	down	noncoding	NR_037807	IL17RC	RefSeq	2618	chr3	+	9958757	9975305	CAACCTCCTTCCTTTATTTGTTCCACAGACTGGACCGCAGATCATTACCTTGAACCACAC	exon sense-overlapping	NM_153461	IL17RC	interleukin-17 receptor C isoform 2 precursor	+	9958781	9975305	5.34368	7.94735
ASHGA5P030427	0.0172312	0.0611427	6.07297	down	noncoding	TCONS_00008449	XLOC_003908	LincRNAs identified by Cabili et al	314	chr4	-	24473714	24474219	GCTGTCGGAAGACACCCTCTTCTCTTCCTTCTTTTACAACTACGGCTCCTCCTGGGAAAC	intergenic							6.38763	8.99003
ASHGA5P058032	0.00102171	0.0258525	6.072	down	noncoding	TCONS_00025558	XLOC_012387	LincRNAs identified by Cabili et al	1578	chr17	-	10178299	10182496	ATACCATCTAAAGTTGGATAACACACGCAGCAGAGGGCACAACTCCTGGCAATTATTACC	intergenic							3.90917	6.51134
ASHGA5P038324	0.0187172	0.0642318	6.06616	down	noncoding	ENST00000491849	RP11-735B13.1	GENCODE	452	chr3	-	84917278	84930830	GCATAAGACCCATGAAGATTACAGACACATACACTCCTAAAATTAAACATTAAGCGGAAT	intergenic							2.98503	5.58582
ASHGA5P039732	0.036977	0.0973629	6.01641	down	noncoding	TCONS_00023008	XLOC_010856	LincRNAs identified by Cabili et al	358	chr14	+	66592482	66593873	CCTTCTTCCCCTCTCTTCATGTTCACAGCATATCTTATTATTGTTAATATTGGAAGTCAA	intergenic							7.23904	9.82794
ASHGA5P029195	0.00268303	0.03424	5.95945	down	noncoding	ENST00000555850	RP11-862P13.1	GENCODE	514	chr14	-	67435754	67436533	GATACTTCACTGTCATAAAGCAAGAGGAGTGAAAATTATTCCTCATTTCAGTCAGATTTC	intronic antisense	NM_001024218	GPHN	gephyrin isoform 2	+	66974124	67648525	3.0666	5.64178
ASHGA5P029195	0.00268303	0.03424	5.95945	down	noncoding	ENST00000555850	RP11-862P13.1	GENCODE	514	chr14	-	67435754	67436533	GATACTTCACTGTCATAAAGCAAGAGGAGTGAAAATTATTCCTCATTTCAGTCAGATTTC	intronic antisense	NM_020806	GPHN	gephyrin isoform 1	+	66974124	67648525	3.0666	5.64178
ASHGA5P039540	0.0249737	0.0759507	5.8917	down	noncoding	ENST00000506795	RPL34-AS1	GENCODE	1136	chr4	-	109461323	109541585	CCATTCCAGTCCTTTTCAAATCCAAGACTGAAATGAATTTTTCTAGCTATTTATCCCATC	bidirectional	NM_000995	RPL34	60S ribosomal protein L34	+	109541721	109551639	7.22203	9.78072
ASHGA5P039540	0.0249737	0.0759507	5.8917	down	noncoding	ENST00000506795	RPL34-AS1	GENCODE	1136	chr4	-	109461323	109541585	CCATTCCAGTCCTTTTCAAATCCAAGACTGAAATGAATTTTTCTAGCTATTTATCCCATC	bidirectional	NM_033625	RPL34	60S ribosomal protein L34	+	109541748	109551639	7.22203	9.78072
ASHGA5P031261	0.0449125	0.109997	5.81857	down	noncoding	TCONS_00006165	XLOC_002770	LincRNAs identified by Cabili et al	833	chr3	+	116958057	116963238	CTCCTTCCTCATGCATACCTTAAGCATTAATTTAAGGTCAAGCACATTTACAGGTTCCCC	intronic antisense	ENST00000539563	LSAMP	limbic system-associated membrane protein [Source:HGNC Symbol;Acc:6705]	-	115529163	117716095	4.40648	6.94715
ASHGA5P039356	0.00153929	0.0285017	5.7566	down	noncoding	ENST00000511010	AC006160.5	GENCODE	750	chr4	-	17589089	17616194	AAATGATTAAACTAGGACTGCATCATGGTGGGATGACCAGCACACTTCAAAGGGAAAAAA	intronic antisense	NM_015907	LAP3	cytosol aminopeptidase	+	17578926	17609590	3.39446	5.91967
ASHGA5P054976	0.0130624	0.0528323	5.68427	down	noncoding	TCONS_00010596	XLOC_004244	LincRNAs identified by Cabili et al	1189	chr5	+	1043854	1046279	GAGAGTGTGTGAGGGTGTGTGAATGAGGGGGTTAGTGTGAACGAGTGGGCGAGTTTGTGA	intergenic							5.707	8.21397
ASHGA5P037394	0.0485104	0.115347	5.67813	down	noncoding	ENST00000435697	LINC00478	GENCODE	716	chr21	+	17791751	17860215	CATCAGGAAGGCAATTCTGTGTGCATGTGTGTGTGTATATATATAGTTAGAAGTTAGAAA	intergenic							5.76264	8.26806
ASHGA5P037647	0.00554834	0.0401563	5.67045	down	noncoding	NR_002727	RFPL1-AS1	RefSeq	5125	chr22	-	29833003	29838118	TGACCATTAAGCTTCTTGGACCTTGAGTACTTCACACAGTGTTAAGATAAAAGTCACAAT	natural antisense	NM_021026	RFPL1	ret finger protein-like 1	+	29834571	29838444	4.6559	7.15936
ASHGA5P058806	0.037692	0.0984862	5.65794	down	noncoding	uc.115-	uc.115	UCR	219	chr3	-	19034157	19034376	CCCTCCTTCTCTGAGTTCAGCAACTAATTATATTTTTAAATAATGGCTACCATTGAACAC	intergenic							5.67552	8.1758
ASHGA5P039244	0.0447361	0.109769	5.62401	down	noncoding	uc003fua.2	FLJ34208	UCSC_knowngene	2711	chr3	+	194207868	194239008	TTCCTCCACTTCCTAATCCCTTCATTATAATTCCTTCCACAACAGAATAAGTTTCTTGAG	natural antisense	ENST00000439040	ATP13A3	ATPase type 13A3 [Source:HGNC Symbol;Acc:24113]	-	194123400	194219093	5.75295	8.24455
ASHGA5P023146	0.0141903	0.0549654	5.53499	down	noncoding	ENST00000571152	LINC00514	GENCODE	3385	chr16	+	3040194	3044510	TCTCTCTCTCCCACGAGCCCTTCCACTAAGAATGGCTATGGAGCAGGGTTCAGGACCTTC	intergenic							7.57783	10.0464
ASHGA5P023100	0.00133837	0.0275471	5.52488	down	noncoding	ENST00000569859	RP11-67H24.2	GENCODE	601	chr16	+	32820876	32835966	CCTGCCCAAGATGCTGTCATCTATATGATCTCAGTATTTTAAAAATCAGCTTCCAGCCCA	intergenic							4.22601	6.69196
ASHGA5P056282	0.0177382	0.0621918	5.50927	down	noncoding	TCONS_00001745	XLOC_001120	LincRNAs identified by Cabili et al	262	chr1	-	183118843	183119157	AGGAGAGGGGTGTGGGCTGGGTGGGGTGTGAGCTGTGTGGTGTGTGAGCAGGAGAGGGGT	intergenic							7.31045	9.77231
ASHGA5P032632	0.00889423	0.044939	5.49736	down	noncoding	ENST00000446002	RP11-412H9.2	GENCODE	390	chr1	-	219086098	219089526	CCTCTCTCTATCCTTACTCACATGAAAATGCAATGGTTCGATTTGTAAAGGTAAATAAAC	intergenic							4.11174	6.57048
ASHGA5P058552	0.00669154	0.041722	5.48689	down	noncoding	uc010gri.1	GGT3P	UCSC_knowngene	1324	chr22	-	18761201	18769844	CTGTCTTGTGGGGGCATTGTGACAGCTGAGGACCTGAACAACTACTGTGCTGAGCTGATC	intergenic							3.86789	6.32388
ASHGA5P040008	0.0062581	0.0409843	5.47515	down	noncoding	uc003hpg.2	WDFY3-AS2	UCSC_knowngene	1739	chr4	+	85887970	85928168	TCTATGGCAGAAAAATGGTCAAGGAATAGGAACTACAACTTCATAAATGAGGAACCAGAA	bidirectional	NM_014991	WDFY3	WD repeat and FYVE domain-containing protein 3	-	85590692	85887544	3.63161	6.08451
ASHGA5P016303	0.0076003	0.0431276	5.4581	down	noncoding	ENST00000429095	AC007092.1	GENCODE	545	chr2	+	58655472	59152836	TGGTGCAGAGGGACTTACCAATTTGGGATTCTTCCAGGAGCTGAAAACTGATTGCAAATA	intergenic							3.5473	5.9957
ASHGA5P057174	0.0236871	0.0734924	5.4407	down	noncoding	TCONS_00014042	XLOC_005955	LincRNAs identified by Cabili et al	849	chr7	+	389823	391347	ACACACACACACACAAGACACGACTTCACACAACGTCCAAAACTCATGCTCACACACATC	intergenic							9.47666	11.9205
ASHGA5P029338	0.00594923	0.0404867	5.32976	down	noncoding	ENST00000554540	CTD-2644I21.1	GENCODE	466	chr14	-	101054111	101055663	TCCTGAAGCCACCTTCCCTTCCTGAGAGCTCCTTGGGGAGAAGGCAAGCCCTGGAAGCCA	intergenic							7.25352	9.66759
ASHGA5P030192	0.0263137	0.078044	5.32466	down	noncoding	ENST00000559428	RP11-499F3.1	GENCODE	476	chr15	-	81926227	81934531	GTCTCTCCAATCTCCTTCTGCCTCCCTCTTCTAAGAACACTTATCATCGGATTTATGACC	intergenic							8.069	10.4817
ASHGA5P031935	0.00708228	0.0423118	5.30583	down	noncoding	ENST00000563230	RP11-556H2.3	GENCODE	433	chr16	+	79123946	79135651	GGAATTACCTGGGATCATTTCTCATCCTCTCTCTCTTTCTCTGTATTACTTAGCCTTAAA	intron sense-overlapping	NM_016373	WWOX	WW domain-containing oxidoreductase isoform 1	+	78133326	79246564	7.33796	9.74554
ASHGA5P033585	0.0113888	0.0493032	5.26676	down	noncoding	TCONS_00028623	XLOC_013658	LincRNAs identified by Cabili et al	652	chr20	-	12915531	12916654	GATGGTGGTGAGATGGGTGAGAAGGAACCAAGGGCGGAGGGAGACAAGGGCTGTTGCAGG	intergenic							3.06601	5.46292
ASHGA5P032972	0.0193271	0.0655502	5.22275	down	noncoding	ENST00000583643	RP11-720N19.2	GENCODE	430	chr17	+	25792137	25792567	CTGCTTGCCATTTTTCTTCCCCTTCCATTTTTCTAATCTCCGGATAATTGTAAGAATGAA	intron sense-overlapping	ENST00000319524	KSR1	kinase suppressor of ras 1 [Source:HGNC Symbol;Acc:6465]	+	25783669	25950717	6.89919	9.284
ASHGA5P032972	0.0193271	0.0655502	5.22275	down	noncoding	ENST00000583643	RP11-720N19.2	GENCODE	430	chr17	+	25792137	25792567	CTGCTTGCCATTTTTCTTCCCCTTCCATTTTTCTAATCTCCGGATAATTGTAAGAATGAA	intron sense-overlapping	ENST00000509603	KSR1	kinase suppressor of ras 1 [Source:HGNC Symbol;Acc:6465]	+	25783669	25944768	6.89919	9.284
ASHGA5P032972	0.0193271	0.0655502	5.22275	down	noncoding	ENST00000583643	RP11-720N19.2	GENCODE	430	chr17	+	25792137	25792567	CTGCTTGCCATTTTTCTTCCCCTTCCATTTTTCTAATCTCCGGATAATTGTAAGAATGAA	intron sense-overlapping	ENST00000580163	KSR1	kinase suppressor of ras 1 [Source:HGNC Symbol;Acc:6465]	+	25783739	25909700	6.89919	9.284
ASHGA5P048179	0.0239947	0.0739242	5.19955	down	noncoding	TCONS_00013319	XLOC_005968	LincRNAs identified by Cabili et al	3365	chr7	+	2479468	2483692	CGGTGGTCTCATCTCTTCTCTCTCAAACCATGGATGGTGCCTTTTAAAGAAAATGACACC	intergenic							5.91524	8.29363
ASHGA5P017105	0.0346142	0.0930546	5.19375	down	noncoding	ENST00000437712	RP11-168K11.3	GENCODE	3043	chr9	+	116381507	116384914	CTCTCTGTCTTCCTGCTGTCTTCCAATATCCTACCTGGAAAGCAACGGGTCTGAAAGGTA	intergenic							6.41541	8.79218
ASHGA5P028563	0.0214635	0.0696637	5.17834	down	noncoding	ENST00000389600	GUCY1B2	GENCODE	2341	chr13	-	51589551	51640343	GTCTCTCTGCCTTTGATTTCTAGGTCCTTCCTCTGCTAATATCAGTCAGAAATTTAAAAT	intergenic							5.85921	8.2317
ASHGA5P030174	0.0205673	0.0680486	5.16818	down	noncoding	ENST00000558971	RP11-762H8.3	GENCODE	383	chr15	-	78549886	78556498	ACATCTCATCTCTCCTCTGTCACTCCTTCCCCATTATTAAAGTTTGTGGATGTTCCTTAG	natural antisense	NM_018602	DNAJA4	dnaJ homolog subfamily A member 4 isoform 1	+	78556486	78574538	7.8037	10.1734
ASHGA5P027937	0.000121203	0.0127748	5.1572	down	noncoding	ENST00000549403	RP11-210N13.1	pseudogene	582	chr12	+	44132631	44133657	CTAGCATATTTCCTAAGACAGTGAAAACTGAGCCCCTTCTGGCCTAAAAATAAATATTAA								7.33948	9.70607
ASHGA5P039181	0.00368513	0.0369302	5.13585	down	noncoding	uc003fky.3	BC036236	UCSC_knowngene	2906	chr3	+	181670166	181721828	CAAAGGCTTACTTGAGTTTTAATGCTTTCGGGACTTCAAATGCTTTTCTATCTTCCTAAT	intergenic							3.17302	5.53362
ASHGA5P018100	0.00751668	0.0429609	5.12076	down	noncoding	ENST00000449448	AC007092.1	GENCODE	682	chr2	+	58655519	59231127	CCCTGGCCGGGGACTTACCAATTTGGGATTCTTCCAGGAGCTGAAAACTGATTGCAAATA	intergenic							3.23815	5.5945
ASHGA5P046070	0.0034237	0.0361534	5.11368	down	noncoding	uc022bqt.1	JA040723	UCSC_knowngene	806	chrM	-	8366	14149	TTTAATATTTTTAGTTGGGTGATGAGGAATAGTGTAAGGAGTATGGGGGTAATTATGGTG	intergenic							7.80646	10.1608
ASHGA5P040144	0.00568898	0.0402776	5.10513	down	noncoding	ENST00000447407	BX571672.1	GENCODE	655	chr1	+	143119060	143231756	GACATTCTTCCCAGTGTCTCAATATGTTTTGGCATCTTTCAGTAAAAATCTTCAAGTTTG	intergenic							5.00906	7.36101
ASHGA5P036029	0.0454408	0.110674	5.10107	down	noncoding	ENST00000453878	AC108051.3	GENCODE	478	chr2	+	103628236	103636356	CAAGCCAGCCACTAAATTCAGGACTGAAGCAAAGGATTAATGCATTTTTCAGACTATTAG	intergenic							4.94974	7.30054
ASHGA5P034045	0.0239643	0.0739242	5.07832	down	noncoding	TCONS_00004060	XLOC_001908	LincRNAs identified by Cabili et al	303	chr2	+	238121307	238121926	GTAAGGTATGTGGTGTGTGACATATGTGTGATACGTGTGTGGCATCTGTGTAAGGTATGT	intergenic							3.74167	6.08603
ASHGA5P020628	0.00914411	0.0454033	5.05911	down	noncoding	ENST00000517726	EVX1-AS	GENCODE	480	chr7	-	27281047	27286848	GTAGTAAATCATCTCTCACTCTCTCCTCCAAATGACTGATGGCCTTAAGTTTTCCACAGC	intronic antisense	NM_001989	EVX1	homeobox even-skipped homolog protein 1	+	27282163	27286192	5.9113	8.25019
ASHGA5P049531	0.000615656	0.0210258	5.0363	down	noncoding	ENST00000578023	KRT16P2	GENCODE	681	chr17	-	16733156	16733931	TCTCCCACAGTCTTCACCTCCTCTTCGTCCTCTTCGAACCGTCAGACCTGGCCCATCCTC	intergenic							7.58913	9.9215
ASHGA5P048227	0.00977334	0.0464515	5.03368	down	noncoding	ENST00000528650	RP11-867G23.4	GENCODE	480	chr11	-	66044339	66044963	ACCAAAGACTTGCTTTCTTGCAGGAAGCAGCTGTGCCAGAGGGCAGGGGACTAGGATCCT	natural antisense	NM_030981	RAB1B	ras-related protein Rab-1B	+	66036055	66044963	3.98505	6.31666
ASHGA5P035473	0.000612091	0.0210027	5.03095	down	noncoding	ENST00000413954	AC064871.3	GENCODE	382	chr2	-	183960150	183972431	TATTACAATTGCAGCAGCCCTGGAAACGCCTGCATTACAATGAACAAGAACCACTCCATC	natural antisense	NM_001142314	DUSP19	dual specificity protein phosphatase 19 isoform 2	+	183943286	183964722	4.27399	6.60482
ASHGA5P035473	0.000612091	0.0210027	5.03095	down	noncoding	ENST00000413954	AC064871.3	GENCODE	382	chr2	-	183960150	183972431	TATTACAATTGCAGCAGCCCTGGAAACGCCTGCATTACAATGAACAAGAACCACTCCATC	natural antisense	NM_080876	DUSP19	dual specificity protein phosphatase 19 isoform 1	+	183943286	183964722	4.27399	6.60482
ASHGA5P058168	0.0490726	0.116473	5.01804	down	noncoding	TCONS_00027248	XLOC_013278	LincRNAs identified by Cabili et al	1258	chr19	-	23708437	23748325	ATGTGATGTGAGTCTCCTTCCTGACCCTTCCTGCAAGGATCTGTGGGACAGACCCAGCAG	intergenic							5.88766	8.21479
ASHGA5P050604	0.00134431	0.0275475	4.99493	down	noncoding	ENST00000443205	AC096669.3	GENCODE	1539	chr2	+	108145942	108172782	AATAGAGAAGTAAATAGCAGTGCCAGGTTTCAAGCATAAGAATCATCAACTCTGAACTTT	intergenic							2.84552	5.16598
ASHGA5P030636	0.0105592	0.0479481	4.989	down	noncoding	uc002auv.1	AX748294	UCSC_knowngene	2433	chr15	+	72908150	72910583	TGCACATGTGCGCACGCACACACACACACAGCAGAAAATCTAGAAATAAACTATTTTAAT	intergenic							7.16436	9.48311
ASHGA5P035623	0.00518344	0.0397311	4.98845	down	noncoding	uc002vvo.1	AF279775	UCSC_knowngene	723	chr2	-	235791851	235797446	GAAAGTGTTGAAAATTGACATCTATGTTTACATATCACAGCAACACAAAGTGCCAGCAAA	intergenic							3.05422	5.37281
ASHGA5P050594	0.0239834	0.0739242	4.9335	down	noncoding	ENST00000451400	AC013402.2	GENCODE	3778	chr2	+	105049724	105137290	CACACACACACAGCACAGATTTTTTTGATTATGTAGATTTCTTTTCCTACTGCAGTTTCA	intergenic							8.04926	10.3519
ASHGA5P035840	0.0350665	0.0937785	4.93046	down	noncoding	TCONS_00004186	XLOC_002030	LincRNAs identified by Cabili et al	496	chr2	-	27957839	27958477	AAACTCATCCATCCAAACATCAGATAAACCTAAACTGAGAGACATTTCACAAAACTACAC	intergenic							4.2641	6.56582
ASHGA5P044084	0.0265218	0.0784845	4.8985	down	noncoding	ENST00000515608	CTD-2541M15.1	GENCODE	2147	chr8	-	6475995	6506328	CACACACAACACACACACACATTTATGATAATGCTTGTTCTTAACCAAAAACTGAGATCT	natural antisense	NM_024596	MCPH1	microcephalin isoform 1	+	6264112	6501140	9.24343	11.5358
ASHGA5P039476	0.0243081	0.0744501	4.87913	down	noncoding	TCONS_00022643	XLOC_010947	LincRNAs identified by Cabili et al	2211	chr14	+	104672214	104676114	GTTTCGCCATCCATCCAATGGTGACCACTCAGTCACTGCCAGATCCTGAGCAGATCCGTC	intergenic							4.79354	7.08016
ASHGA5P055588	0.00107495	0.0258808	4.86618	down	noncoding	ENST00000397112	GOLGA2B	GENCODE	2632	chr12	-	100550189	100567437	GCCTGACCATGCCTCCTTTCCCTTTCAGCTTTCTCATAGACCAATGGGCTTGGAGCATTA	intergenic							6.57957	8.86236
ASHGA5P058780	0.0144328	0.0554475	4.82886	down	noncoding	uc.432+	uc.432	UCR	211	chr18	+	35564931	35565142	CCTCCCTCTTATTAGAAACTGTGCATGAATTTGCATAGAATAAACTGAGCTCATAAATCA	intergenic							5.00542	7.2771
ASHGA5P049547	0.000704607	0.0225597	4.80351	down	noncoding	ENST00000577750	KRT16P1	GENCODE	681	chr17	+	18345434	18346209	TCTCCCACAGTCTTCACCTCCTCTTCGTCCTCTTCGAGCCGTCAGACCTGGCCCATCCTC	intergenic							7.60776	9.87185
ASHGA5P041904	0.00407443	0.0377672	4.77194	down	noncoding	ENST00000511053	KHDC1P1	pseudogene	508	chr6	-	73918805	73919803	CCTTTCCCTTACCAAGTGATTGGTCGTTAGGTATTCTATTTGAGTTCACTCTATTCGTAA								2.90732	5.1619
ASHGA5P047906	0.0246613	0.0753235	4.75536	down	noncoding	ENST00000528151	RP11-236J17.6	GENCODE	597	chr11	-	8060135	8061246	GACTAACAACCACCATCACCCATTAATTAGGACATGGAAACATCTTCTGGTCGCAGTCTC	natural antisense	NM_003320	TUB	tubby protein homolog isoform a	+	8060179	8127654	5.86453	8.11408
ASHGA5P038157	0.00423044	0.038212	4.74133	down	noncoding	ENST00000422374	RP11-466L17.1	GENCODE	4063	chr1	+	56046709	56200675	AATCCCTTCACCCTCTCTCCATCTTTGTAAAAATTCTCCTCATTAAATTATTGTTCAGTG	intergenic							7.84744	10.0927
ASHGA5P034525	0.0111208	0.0490518	4.71595	down	noncoding	TCONS_00003833	XLOC_001641	LincRNAs identified by Cabili et al	625	chr2	+	121334544	121335384	GGCTGGCTAGGTTGACTTTAAATGTCAAGCCAGAAAATAAATATTGAAAATTCAACTGCA	intergenic							4.65533	6.89288
ASHGA5P038229	0.00136884	0.0277445	4.70027	down	noncoding	TCONS_00024700	XLOC_011979	LincRNAs identified by Cabili et al	534	chr16	-	66041411	66048221	ATAAACCTTCTTTTCAGCTCCTCCTATAGGGGCACCTTCTAATCAGGGACTTTGGTTCAG	intergenic							4.57477	6.80751
ASHGA5P047405	0.00728943	0.042698	4.6851	down	noncoding	TCONS_00014981	XLOC_007062	LincRNAs identified by Cabili et al	281	chr8	-	39267714	39274897	TGTATTTGTTACTCTCCTCTCTCCAAGCAGTAGCATTCAAGGTTGTTAGAGACTGGTGCT	intergenic							4.95052	7.1786
ASHGA5P050511	0.0407478	0.103224	4.67561	down	noncoding	ENST00000423402	PCBP1-AS1	GENCODE	553	chr2	-	70223949	70315039	GACTCCCCTTTCTTCCCAATGATGCTTCCTACTTCCTTTCCGTGCATAAGAAGCCGAATG	natural antisense	NM_006196	PCBP1	poly(rC)-binding protein 1	+	70314584	70316334	7.07659	9.30175
ASHGA5P031845	0.00303188	0.0355889	4.64243	down	noncoding	ENST00000569274	RP11-63M22.2	GENCODE	1790	chr16	+	66754799	66765688	ATTGGTCACTATACCACAATTATCATTCTACAGTCAGTTTACTGTCATTACCTAGACAAC	natural antisense	NM_006141	DYNC1LI2	cytoplasmic dynein 1 light intermediate chain 2	-	66754798	66785525	3.12488	5.33976
ASHGA5P037068	0.0410671	0.103748	4.61294	down	noncoding	uc002xlo.3	BC036500	UCSC_knowngene	4105	chr20	+	42846121	42852332	CGTTTCTGGACAATTAGGGGTGTGTGTGGGTGTTTGTTGTAATAAAAAACTCTAAACCAA	intergenic							5.87737	8.08306
ASHGA5P038083	0.0218278	0.0702773	4.60581	down	noncoding	NR_037903	LOC100507582	RefSeq	994	chr3	-	4939913	4948186	TTAAAACATCCATCTGTCATCCATCTAGTGAGGTCAGGAGAGTGGCTGCTTAACTTCTGG	intergenic							3.44817	5.65163
ASHGA5P032705	0.00614436	0.0408325	4.5975	down	noncoding	ENST00000431729	RP11-191N8.2	GENCODE	423	chr1	-	222001007	222014008	GGCAGATCACCAAAGAACTCAAGATGTACTGATATTTTGCCAGTTTCCTTCATCAACAAC	intergenic							4.53819	6.73904
ASHGA5P054615	5.07696e-05	0.00975305	4.58782	down	noncoding	ENST00000519451	RP11-962G15.1	GENCODE	514	chr8	-	36622471	36636682	ATCTTAATAGGTGAGTACATAATTGGCTTCCCTGTATCTAAATCTAGACGCAACTCTGTT	intergenic							3.72894	5.92675
ASHGA5P035320	0.0405664	0.102991	4.58099	down	noncoding	ENST00000419784	RP1-156L9.1	GENCODE	840	chr2	-	132741509	132751734	CTCTGTCCTCTTTCTCATACAATTTATCTTTTCCACATATGGATGGAATAAAACTGCAGA	intergenic							4.92749	7.12315
ASHGA5P046941	0.00463298	0.0388724	4.5749	down	noncoding	ENST00000435317	RP11-464F9.9	GENCODE	508	chr10	-	75432879	75435692	AGCTTTTAAAAAGGAGCATCTCAGAATAAGATGGTGGTACAATTTGCTTATTGAGAAAGG	exon sense-overlapping	NM_001144000	AGAP5	arf-GAP with GTPase, ANK repeat and PH domain-containing protein 5	-	75434032	75457554	3.76182	5.95556
ASHGA5P027315	0.000461808	0.0187433	4.5538	down	noncoding	ENST00000551419	RP11-793H13.9	GENCODE	545	chr12	-	53863569	53864527	GTAAAAAATATGACCCTGGACAGCACAGATCTGATGTTCATGAACCACTACACTATGGTG	intronic antisense	NM_001098620	PCBP2	poly(rC)-binding protein 2 isoform c	+	53845885	53874946	3.16069	5.34776
ASHGA5P027315	0.000461808	0.0187433	4.5538	down	noncoding	ENST00000551419	RP11-793H13.9	GENCODE	545	chr12	-	53863569	53864527	GTAAAAAATATGACCCTGGACAGCACAGATCTGATGTTCATGAACCACTACACTATGGTG	intronic antisense	NM_001128911	PCBP2	poly(rC)-binding protein 2 isoform d	+	53845885	53874946	3.16069	5.34776
ASHGA5P027315	0.000461808	0.0187433	4.5538	down	noncoding	ENST00000551419	RP11-793H13.9	GENCODE	545	chr12	-	53863569	53864527	GTAAAAAATATGACCCTGGACAGCACAGATCTGATGTTCATGAACCACTACACTATGGTG	intronic antisense	NM_001128912	PCBP2	poly(rC)-binding protein 2 isoform e	+	53845885	53874946	3.16069	5.34776
ASHGA5P027315	0.000461808	0.0187433	4.5538	down	noncoding	ENST00000551419	RP11-793H13.9	GENCODE	545	chr12	-	53863569	53864527	GTAAAAAATATGACCCTGGACAGCACAGATCTGATGTTCATGAACCACTACACTATGGTG	intronic antisense	NM_001128913	PCBP2	poly(rC)-binding protein 2 isoform f	+	53845885	53874946	3.16069	5.34776
ASHGA5P027315	0.000461808	0.0187433	4.5538	down	noncoding	ENST00000551419	RP11-793H13.9	GENCODE	545	chr12	-	53863569	53864527	GTAAAAAATATGACCCTGGACAGCACAGATCTGATGTTCATGAACCACTACACTATGGTG	intronic antisense	NM_001128914	PCBP2	poly(rC)-binding protein 2 isoform g	+	53845885	53874946	3.16069	5.34776
ASHGA5P027315	0.000461808	0.0187433	4.5538	down	noncoding	ENST00000551419	RP11-793H13.9	GENCODE	545	chr12	-	53863569	53864527	GTAAAAAATATGACCCTGGACAGCACAGATCTGATGTTCATGAACCACTACACTATGGTG	intronic antisense	NM_005016	PCBP2	poly(rC)-binding protein 2 isoform a	+	53845885	53874946	3.16069	5.34776
ASHGA5P027315	0.000461808	0.0187433	4.5538	down	noncoding	ENST00000551419	RP11-793H13.9	GENCODE	545	chr12	-	53863569	53864527	GTAAAAAATATGACCCTGGACAGCACAGATCTGATGTTCATGAACCACTACACTATGGTG	intronic antisense	NM_031989	PCBP2	poly(rC)-binding protein 2 isoform b	+	53845885	53874946	3.16069	5.34776
ASHGA5P016557	0.00637342	0.0410595	4.53634	down	noncoding	ENST00000431656	LINC00459	GENCODE	376	chr13	+	62897789	62902966	CTTGATTAAGGTCGCAAAAGAAGAGACAACTATACATTTTGTGATGCTGAAGGGAAATGT	intergenic							3.42748	5.609
ASHGA5P040312	0.0273087	0.0801442	4.52158	down	noncoding	ENST00000514848	CTD-2297D10.1	GENCODE	454	chr5	-	5142250	5176327	GGCACGAAGCCCTGGCTTTTCTTCTTCTTTCTTCTGTGTCTATAATGTGTTTTATCTTAA	intronic antisense	NM_139056	ADAMTS16	A disintegrin and metalloproteinase with thrombospondin motifs 16 preproprotein	+	5140442	5320412	4.62636	6.80319
ASHGA5P000510	0.00552432	0.0401563	4.51473	down	noncoding	chr8:117452225-117463525+	chr8:117452225-117463525	LincRNAs identified by Khalil et al	11300	chr8	+	117383044	117394344	ATTCAACAATAACTTGCTGGACACACACTATGGATAAAGTGCTGTACTTGTGTAAGCAAA	intergenic							3.80455	5.97919
ASHGA5P048042	0.034029	0.0918834	4.44569	down	noncoding	ENST00000533814	RP11-58K22.5	GENCODE	543	chr11	-	44626057	44626887	AGCTGATTTTTAACCCGCCTTCCTTCTTGTCCATATAATAACAAACACCAGCCTTTCTTG	natural antisense	NM_001024844	CD82	CD82 antigen isoform 2	+	44587140	44641315	5.67321	7.82562
ASHGA5P048042	0.034029	0.0918834	4.44569	down	noncoding	ENST00000533814	RP11-58K22.5	GENCODE	543	chr11	-	44626057	44626887	AGCTGATTTTTAACCCGCCTTCCTTCTTGTCCATATAATAACAAACACCAGCCTTTCTTG	natural antisense	NM_002231	CD82	CD82 antigen isoform 1	+	44587140	44641315	5.67321	7.82562
ASHGA5P018357	0.00828905	0.0440538	4.44158	down	noncoding	ENST00000452505	RP1-302D9.2	GENCODE	550	chr22	+	33504514	33512280	ATCTCTCTACCATCTAACAAGCCAGATATTGTCCTCTCTCTCTGGAGAAAGCATCAGCAG	intergenic							5.40543	7.5565
ASHGA5P037471	0.000225543	0.0144426	4.43743	down	noncoding	TCONS_00024499	XLOC_011816	LincRNAs identified by Cabili et al	1375	chr16	+	86773463	86775053	AGTCATCGGCATCACAGCAAAACAAAAACACACACACAACAGAAGAAACCACGCTGGTGA	intergenic							5.35815	7.50787
ASHGA5P048939	0.0478258	0.114368	4.43524	down	noncoding	TCONS_00025565	XLOC_012393	LincRNAs identified by Cabili et al	2051	chr17	-	13679959	13682238	ATATTTGTCCCCTTCCTTTCCACAGTCATCCTCTCAGCTCTTAATCTGGGTGTCTGGTTA	intergenic							7.45971	9.60872
ASHGA5P026670	0.025357	0.0764653	4.41789	down	noncoding	ENST00000500113	RP11-705O3.1	GENCODE	1789	chr11	+	77850848	77854134	CCTTCCTCACATCATTCCAACCAACTTCCATCCTTACAATCGATTACTTTCCTGTAATAG	bidirectional	NM_001007027	ALG8	probable dolichyl pyrophosphate Glc1Man9GlcNAc2 alpha-1,3-glucosyltransferase isoform b	-	77811987	77850699	4.25747	6.40083
ASHGA5P026670	0.025357	0.0764653	4.41789	down	noncoding	ENST00000500113	RP11-705O3.1	GENCODE	1789	chr11	+	77850848	77854134	CCTTCCTCACATCATTCCAACCAACTTCCATCCTTACAATCGATTACTTTCCTGTAATAG	bidirectional	NM_024079	ALG8	probable dolichyl pyrophosphate Glc1Man9GlcNAc2 alpha-1,3-glucosyltransferase isoform a	-	77811987	77850699	4.25747	6.40083
ASHGA5P022215	0.0167225	0.0603279	4.39413	down	noncoding	ENST00000552466	RP11-114H23.1	GENCODE	357	chr12	-	76084536	76086138	CACACCTGTCTGTCTCACCTCTGACAACCTTGATATAAATTAAACAATGAATAAGAACAA	intergenic							5.3743	7.50988
ASHGA5P039373	0.00589548	0.0404119	4.38234	down	noncoding	ENST00000513616	RP11-415C15.3	GENCODE	649	chr4	-	27264127	27268876	TGTGTAAGTTTTGGGGTCTAAGAATTAGAACTGATGTCACATGCAGAGTTTGTCAAGTGC	intergenic							3.5099	5.6416
ASHGA5P022041	0.00556722	0.0401563	4.38209	down	noncoding	ENST00000553197	RP11-121G22.3	GENCODE	875	chr12	+	81672979	81706068	CATTTCTGAGGTCAGAGGCAGTGCAGCTTGTGTTACAACTCAAAAGAGTAATACTCTGAA	intronic antisense	NM_001220473	PPFIA2	liprin-alpha-2 isoform b	-	81652044	82152474	3.7299	5.86152
ASHGA5P022041	0.00556722	0.0401563	4.38209	down	noncoding	ENST00000553197	RP11-121G22.3	GENCODE	875	chr12	+	81672979	81706068	CATTTCTGAGGTCAGAGGCAGTGCAGCTTGTGTTACAACTCAAAAGAGTAATACTCTGAA	intronic antisense	NM_001220474	PPFIA2	liprin-alpha-2 isoform c	-	81652044	82152474	3.7299	5.86152
ASHGA5P022041	0.00556722	0.0401563	4.38209	down	noncoding	ENST00000553197	RP11-121G22.3	GENCODE	875	chr12	+	81672979	81706068	CATTTCTGAGGTCAGAGGCAGTGCAGCTTGTGTTACAACTCAAAAGAGTAATACTCTGAA	intronic antisense	NM_001220475	PPFIA2	liprin-alpha-2 isoform d	-	81652044	82152286	3.7299	5.86152
ASHGA5P022041	0.00556722	0.0401563	4.38209	down	noncoding	ENST00000553197	RP11-121G22.3	GENCODE	875	chr12	+	81672979	81706068	CATTTCTGAGGTCAGAGGCAGTGCAGCTTGTGTTACAACTCAAAAGAGTAATACTCTGAA	intronic antisense	NM_001220476	PPFIA2	liprin-alpha-2 isoform e	-	81652044	82152286	3.7299	5.86152
ASHGA5P022041	0.00556722	0.0401563	4.38209	down	noncoding	ENST00000553197	RP11-121G22.3	GENCODE	875	chr12	+	81672979	81706068	CATTTCTGAGGTCAGAGGCAGTGCAGCTTGTGTTACAACTCAAAAGAGTAATACTCTGAA	intronic antisense	NM_001220477	PPFIA2	liprin-alpha-2 isoform f	-	81652044	81992150	3.7299	5.86152
ASHGA5P022041	0.00556722	0.0401563	4.38209	down	noncoding	ENST00000553197	RP11-121G22.3	GENCODE	875	chr12	+	81672979	81706068	CATTTCTGAGGTCAGAGGCAGTGCAGCTTGTGTTACAACTCAAAAGAGTAATACTCTGAA	intronic antisense	NM_001220478	PPFIA2	liprin-alpha-2 isoform g	-	81652044	81992150	3.7299	5.86152
ASHGA5P022041	0.00556722	0.0401563	4.38209	down	noncoding	ENST00000553197	RP11-121G22.3	GENCODE	875	chr12	+	81672979	81706068	CATTTCTGAGGTCAGAGGCAGTGCAGCTTGTGTTACAACTCAAAAGAGTAATACTCTGAA	intronic antisense	NM_001220479	PPFIA2	liprin-alpha-2 isoform h	-	81652044	81763193	3.7299	5.86152
ASHGA5P022041	0.00556722	0.0401563	4.38209	down	noncoding	ENST00000553197	RP11-121G22.3	GENCODE	875	chr12	+	81672979	81706068	CATTTCTGAGGTCAGAGGCAGTGCAGCTTGTGTTACAACTCAAAAGAGTAATACTCTGAA	intronic antisense	NM_001220480	PPFIA2	liprin-alpha-2 isoform i	-	81652044	81763193	3.7299	5.86152
ASHGA5P022041	0.00556722	0.0401563	4.38209	down	noncoding	ENST00000553197	RP11-121G22.3	GENCODE	875	chr12	+	81672979	81706068	CATTTCTGAGGTCAGAGGCAGTGCAGCTTGTGTTACAACTCAAAAGAGTAATACTCTGAA	intronic antisense	NM_003625	PPFIA2	liprin-alpha-2 isoform a	-	81652044	82153109	3.7299	5.86152
ASHGA5P056712	0.00201795	0.0311786	4.36455	down	noncoding	TCONS_00007998	XLOC_003461	LincRNAs identified by Cabili et al	491	chr4	+	13492920	13520604	TGCTGCTAAGAATGGGACTGTTTCAAGGGAAGGCTCCTTACAGTGAAGAAAAGGGTCAAA	intergenic							2.9356	5.06143
ASHGA5P051091	0.00694847	0.0420215	4.35982	down	noncoding	ENST00000423808	AL035610.1	GENCODE	449	chr21	+	29462632	29475109	TATCTAAGATACACACACAACCACACACGCGCACACACGGTAGAGATAAATATGTTCGAA	intergenic							6.60271	8.72698
ASHGA5P042428	0.0026609	0.03424	4.34959	down	noncoding	ENST00000448559	TDRG1	GENCODE	741	chr6	+	40308203	40347624	GAGAATTTCTAAGGAGCCTCCTTTTTAAAGCCTTTCACTTCACCTGCTCTCCAACAGCTG	intergenic							7.24621	9.36709
ASHGA5P037897	0.00726711	0.0426792	4.34905	down	noncoding	TCONS_00024751	XLOC_012036	LincRNAs identified by Cabili et al	679	chr16	-	85433936	85434846	TGCCTCCTCTCACACACACAGATGCGCAAGGTCAAAGCTAGGTCTCCATTATGACCCCTT	intergenic							5.21445	7.33515
ASHGA5P043938	0.00607713	0.0406656	4.34855	down	noncoding	ENST00000413567	AC083867.4	GENCODE	457	chr7	+	137848185	137849383	AGGAGGAGGAGGAGAAAAGGATTTGAAGAAATTGAATCAGTTCTGGAACAGCAGACACAG	intergenic							3.76312	5.88365
ASHGA5P033265	0.0356404	0.0949005	4.33163	down	noncoding	ENST00000583841	RP5-1171I10.4	GENCODE	840	chr17	+	56414606	56493127	TAGTTTTGGCCCTTCCTTTCTCTAAAGTTTATTCCCAAAAACAGGTAGCATTCCTGATTG	intronic antisense	NM_003168	SUPT4H1	transcription elongation factor SPT4	-	56422538	56429563	6.12789	8.2428
ASHGA5P033265	0.0356404	0.0949005	4.33163	down	noncoding	ENST00000583841	RP5-1171I10.4	GENCODE	840	chr17	+	56414606	56493127	TAGTTTTGGCCCTTCCTTTCTCTAAAGTTTATTCCCAAAAACAGGTAGCATTCCTGATTG	natural antisense	NM_017763	RNF43	E3 ubiquitin-protein ligase RNF43 precursor	-	56431037	56494931	6.12789	8.2428
ASHGA5P056553	0.01367	0.0540759	4.30532	down	noncoding	TCONS_00006099	XLOC_002710	LincRNAs identified by Cabili et al	709	chr3	+	75485927	75492775	AATGCTAGATCAGATAGGGTCTCTCTCTCTGCCACCCAGGCCAGAGTGCAGTTGACGCAG	intergenic							6.77626	8.88238
ASHGA5P035647	0.034811	0.0934475	4.30376	down	noncoding	TCONS_00005055	XLOC_001935	LincRNAs identified by Cabili et al	234	chr2	-	747657	748017	TGATGTCGTTGTCGGTGGTGGTGGTGATGGTGAGGTCACTGTAGGAAAGCCCAGCAGAAT	intergenic							6.51507	8.62067
ASHGA5P020223	0.00263116	0.03424	4.27016	down	noncoding	ENST00000509921	CTC-205M6.2	GENCODE	822	chr5	+	180258038	180261871	TGCGGGGAGGCCTCAGGGCACCTTCCTCCTCTCTCTCAGGCACGTCCTCGACCTCAGTTG	intergenic							7.41434	9.50863
ASHGA5P050151	0.0126357	0.0520157	4.257	down	noncoding	TCONS_00018849	XLOC_008653	LincRNAs identified by Cabili et al	422	chr10	+	125319845	125321719	AAAGCCAGCCATCCCCAGCGCTGTAACTGAGTGGCCAGTGGTGGGAGGTGAGGTCACAGA	intergenic							5.31881	7.40864
ASHGA5P023349	0.00708092	0.0423118	4.24609	down	noncoding	ENST00000579057	LINC00271	GENCODE	464	chr6	+	135819074	135838197	GAATTGAAAGGCTTGGCTGTTGTTGATATAAAGGAATGCAGCTAACCAGGGAGATGGAAA	bidirectional	NM_001134830	AHI1	jouberin isoform a	-	135605109	135818903	3.31888	5.40502
ASHGA5P023349	0.00708092	0.0423118	4.24609	down	noncoding	ENST00000579057	LINC00271	GENCODE	464	chr6	+	135819074	135838197	GAATTGAAAGGCTTGGCTGTTGTTGATATAAAGGAATGCAGCTAACCAGGGAGATGGAAA	bidirectional	NM_001134831	AHI1	jouberin isoform a	-	135605109	135818903	3.31888	5.40502
ASHGA5P023349	0.00708092	0.0423118	4.24609	down	noncoding	ENST00000579057	LINC00271	GENCODE	464	chr6	+	135819074	135838197	GAATTGAAAGGCTTGGCTGTTGTTGATATAAAGGAATGCAGCTAACCAGGGAGATGGAAA	bidirectional	NM_001134832	AHI1	jouberin isoform b	-	135708921	135818903	3.31888	5.40502
ASHGA5P023349	0.00708092	0.0423118	4.24609	down	noncoding	ENST00000579057	LINC00271	GENCODE	464	chr6	+	135819074	135838197	GAATTGAAAGGCTTGGCTGTTGTTGATATAAAGGAATGCAGCTAACCAGGGAGATGGAAA	bidirectional	NM_017651	AHI1	jouberin isoform a	-	135605109	135818903	3.31888	5.40502
ASHGA5P035692	0.00788594	0.0434582	4.24118	down	noncoding	ENST00000444416	AC073479.1	GENCODE	2695	chr2	+	6122109	6125029	CTTTCCTTCCCCCCATCCCTTGAACAAACATGATTTTTAAATTCCCCTCATCATTTTTAG	intergenic							10.7147	12.7992
ASHGA5P031996	0.00104046	0.0258525	4.23147	down	noncoding	ENST00000567968	RP5-1142A6.2	GENCODE	4521	chr16	+	88803207	88807826	TTGCAAAATGGAAAATCAAGGGTTAGGGTAAAGAAAGAAAGTAGCCAGAAAGAGCCCCCA	natural antisense	NM_001142864	PIEZO1	piezo-type mechanosensitive ion channel component 1	-	88781745	88851372	4.75035	6.8315
ASHGA5P033563	0.00349417	0.0362019	4.22482	down	noncoding	ENST00000420830	RP11-261C10.2	GENCODE	475	chr1	-	243194573	243211171	TTGAAGGTATGGATAAGGCCCTGAGTCATCTTCCTGAGCTGAATGATAGTTAAGCTGAAT	intergenic							4.26363	6.34252
ASHGA5P038589	0.00388223	0.0375242	4.22106	down	noncoding	NR_040105	FLJ46066	RefSeq	1806	chr3	-	182164757	182204150	AAGACAATTTGGGGAGGTTTTATTAAGGTTGTATCCTGAGCACACATTTCTCTTGTTGCC	intergenic							3.0099	5.08751
ASHGA5P028185	0.0474654	0.113801	4.20279	down	noncoding	ENST00000546936	RP11-315E17.1	GENCODE	547	chr12	+	81771820	81824122	CAGCATATACCCTCTCCTTCCCTTCGTTGCTGAATTTCTCAAAAGAGTATTACCTTCTTT	intronic antisense	NM_001220473	PPFIA2	liprin-alpha-2 isoform b	-	81652044	82152474	8.44802	10.5194
ASHGA5P028185	0.0474654	0.113801	4.20279	down	noncoding	ENST00000546936	RP11-315E17.1	GENCODE	547	chr12	+	81771820	81824122	CAGCATATACCCTCTCCTTCCCTTCGTTGCTGAATTTCTCAAAAGAGTATTACCTTCTTT	intronic antisense	NM_001220474	PPFIA2	liprin-alpha-2 isoform c	-	81652044	82152474	8.44802	10.5194
ASHGA5P028185	0.0474654	0.113801	4.20279	down	noncoding	ENST00000546936	RP11-315E17.1	GENCODE	547	chr12	+	81771820	81824122	CAGCATATACCCTCTCCTTCCCTTCGTTGCTGAATTTCTCAAAAGAGTATTACCTTCTTT	intronic antisense	NM_001220475	PPFIA2	liprin-alpha-2 isoform d	-	81652044	82152286	8.44802	10.5194
ASHGA5P028185	0.0474654	0.113801	4.20279	down	noncoding	ENST00000546936	RP11-315E17.1	GENCODE	547	chr12	+	81771820	81824122	CAGCATATACCCTCTCCTTCCCTTCGTTGCTGAATTTCTCAAAAGAGTATTACCTTCTTT	intronic antisense	NM_001220476	PPFIA2	liprin-alpha-2 isoform e	-	81652044	82152286	8.44802	10.5194
ASHGA5P028185	0.0474654	0.113801	4.20279	down	noncoding	ENST00000546936	RP11-315E17.1	GENCODE	547	chr12	+	81771820	81824122	CAGCATATACCCTCTCCTTCCCTTCGTTGCTGAATTTCTCAAAAGAGTATTACCTTCTTT	intronic antisense	NM_001220477	PPFIA2	liprin-alpha-2 isoform f	-	81652044	81992150	8.44802	10.5194
ASHGA5P028185	0.0474654	0.113801	4.20279	down	noncoding	ENST00000546936	RP11-315E17.1	GENCODE	547	chr12	+	81771820	81824122	CAGCATATACCCTCTCCTTCCCTTCGTTGCTGAATTTCTCAAAAGAGTATTACCTTCTTT	intronic antisense	NM_001220478	PPFIA2	liprin-alpha-2 isoform g	-	81652044	81992150	8.44802	10.5194
ASHGA5P028185	0.0474654	0.113801	4.20279	down	noncoding	ENST00000546936	RP11-315E17.1	GENCODE	547	chr12	+	81771820	81824122	CAGCATATACCCTCTCCTTCCCTTCGTTGCTGAATTTCTCAAAAGAGTATTACCTTCTTT	intronic antisense	NM_003625	PPFIA2	liprin-alpha-2 isoform a	-	81652044	82153109	8.44802	10.5194
ASHGA5P058702	0.0332726	0.0905723	4.20098	down	noncoding	uc.448-	uc.448	UCR	232	chr19	-	30841529	30841761	CTCTCCTCCTGCCACAACAATCAATTCCTCTTATAAATCTGATTAGATTTTATGATGCTT	intergenic							6.18511	8.25583
ASHGA5P036403	0.0482471	0.114916	4.17259	down	noncoding	uc002vea.3	BC130595	UCSC_knowngene	1287	chr2	+	211097415	211098702	TCTGTCCATTCCCACTACCAGAAAGAAACTCTGTGTTAGTTTTTCTTTTACCTTTATTGA	intergenic							5.24714	7.30809
ASHGA5P037984	0.0419774	0.105183	4.17046	down	noncoding	uc003avi.1	BC127823	UCSC_knowngene	574	chr22	+	38615652	38616226	TTGTGACACGAGGCTCTTCCTAAGTCAGGAGCTAGTATAAGCCCAGCCTGCTGGGGGTTC	natural antisense	NM_001195071	TMEM184B	transmembrane protein 184B isoform a	-	38615297	38668670	5.66174	7.72194
ASHGA5P037984	0.0419774	0.105183	4.17046	down	noncoding	uc003avi.1	BC127823	UCSC_knowngene	574	chr22	+	38615652	38616226	TTGTGACACGAGGCTCTTCCTAAGTCAGGAGCTAGTATAAGCCCAGCCTGCTGGGGGTTC	natural antisense	NM_001195072	TMEM184B	transmembrane protein 184B isoform b	-	38615297	38669040	5.66174	7.72194
ASHGA5P037984	0.0419774	0.105183	4.17046	down	noncoding	uc003avi.1	BC127823	UCSC_knowngene	574	chr22	+	38615652	38616226	TTGTGACACGAGGCTCTTCCTAAGTCAGGAGCTAGTATAAGCCCAGCCTGCTGGGGGTTC	natural antisense	NM_012264	TMEM184B	transmembrane protein 184B isoform a	-	38615297	38669040	5.66174	7.72194
ASHGA5P047369	0.00823862	0.0439509	4.17008	down	noncoding	ENST00000428915	RP11-291L22.4	GENCODE	934	chr10	+	38742108	38755311	CTCGCCAACAAGGAAAACTTTTAAGTAGAGCAGAACCTGAATAGACAATATATTTCTTTC	intergenic							4.16489	6.22497
ASHGA5P041785	0.00559968	0.0402344	4.16582	down	noncoding	ENST00000580587	XXbac-BPG181M17.6	GENCODE	577	chr6	-	32939841	32940630	TATCGGTAGGCAGAATCCTCCAGCTCGTTCTAGAGGCTGCTCCACTCCAGCACGAAATGG	natural antisense	NM_001113182	BRD2	bromodomain-containing protein 2 isoform 1	+	32938664	32949282	5.47931	7.53791
ASHGA5P041785	0.00559968	0.0402344	4.16582	down	noncoding	ENST00000580587	XXbac-BPG181M17.6	GENCODE	577	chr6	-	32939841	32940630	TATCGGTAGGCAGAATCCTCCAGCTCGTTCTAGAGGCTGCTCCACTCCAGCACGAAATGG	natural antisense	NM_001199455	BRD2	bromodomain-containing protein 2 isoform 2	+	32939371	32949282	5.47931	7.53791
ASHGA5P041785	0.00559968	0.0402344	4.16582	down	noncoding	ENST00000580587	XXbac-BPG181M17.6	GENCODE	577	chr6	-	32939841	32940630	TATCGGTAGGCAGAATCCTCCAGCTCGTTCTAGAGGCTGCTCCACTCCAGCACGAAATGG	natural antisense	NM_005104	BRD2	bromodomain-containing protein 2 isoform 1	+	32936436	32949282	5.47931	7.53791
ASHGA5P050310	0.00661865	0.0415457	4.15944	down	noncoding	TCONS_00015390	XLOC_006972	LincRNAs identified by Cabili et al	370	chr8	-	1236703	1237178	AAACTAGTTCCCCTCCTAACAAAACCACATACACACACACACGCTGAACCAAAACTAGTT	intergenic							7.22764	9.28403
ASHGA5P023111	0.00630562	0.0410595	4.15192	down	noncoding	ENST00000570118	RP11-243A14.3	GENCODE	451	chr16	-	9539866	9549362	TTTGTCTTGGAAGCAGACAATGGCCCTTCACCAGTAAGACCAAGAGAATAAGAAAAAATA	intergenic							5.23298	7.28676
ASHGA5P026825	0.0266831	0.0788471	4.15171	down	noncoding	ENST00000423187	RP11-99H8.1	GENCODE	432	chr1	-	71181615	71185972	GGCTCTTCCTCCTGCTCCTGTCACCACAACAACTAGTGTGTGGAGCACAACTAGCCTGAC	intergenic							7.03306	9.08677
ASHGA5P022854	0.0455689	0.110794	4.15097	down	noncoding	ENST00000564109	CTD-2311M21.2	GENCODE	915	chr15	+	74643108	74654244	TTTGGCCAGCCAGCCAGGAGGAAGAGGGACACGCATGAAATTTGGTGCCATGACTCGGAT	intronic antisense	NM_000781	CYP11A1	cholesterol side-chain cleavage enzyme, mitochondrial isoform a precursor	-	74630102	74660081	4.70155	6.755
ASHGA5P022854	0.0455689	0.110794	4.15097	down	noncoding	ENST00000564109	CTD-2311M21.2	GENCODE	915	chr15	+	74643108	74654244	TTTGGCCAGCCAGCCAGGAGGAAGAGGGACACGCATGAAATTTGGTGCCATGACTCGGAT	intronic antisense	NM_001099773	CYP11A1	cholesterol side-chain cleavage enzyme, mitochondrial isoform b	-	74630102	74658553	4.70155	6.755
ASHGA5P033218	0.000210776	0.0142595	4.14842	down	noncoding	TCONS_00016098	XLOC_007489	LincRNAs identified by Cabili et al	315	chr9	+	102648727	102657226	CACAGGTAGAAAGTCACTGCCCTTTGGAGAATAGATGTTTACCTTTTCCAGAAACAGTCG	intergenic							3.28451	5.33707
ASHGA5P047475	0.00738059	0.0427228	4.14559	down	noncoding	ENST00000432960	RP11-710A11.2	GENCODE	312	chr10	+	72307688	72316552	GGCTGGCTCCCAGATGGGGTGTTTTTTATCTGTAAAAATTGTTTTTAAATAACTCATTAC	intron sense-overlapping	NM_014431	PALD1	paladin	+	72238563	72328206	4.64196	6.69354
ASHGA5P016648	0.038328	0.0994994	4.12775	down	noncoding	ENST00000432511	RP11-134P9.1	GENCODE	505	chr1	-	203270293	203274387	ACCATTCACGCCGTCTTCCTTCCTCATTGTGGTTTGGACCTTCTCGAGAAAGAATCTGGC	bidirectional	NM_006763	BTG2	protein BTG2	+	203274663	203278729	5.9148	7.96015
ASHGA5P045953	0.000507634	0.019591	4.12672	down	noncoding	ENST00000561961	RP11-355O1.11	GENCODE	1994	chr9	+	125699901	125702605	ATACACACACACAGAAGGATATACTCTAAAGTATTAACATTGGCCCTGGGAATGCCATGG	intergenic							5.54991	7.5949
ASHGA5P058716	0.0360328	0.0955589	4.12421	down	noncoding	uc.38-	uc.38	UCR	224	chr1	-	163939954	163940178	GTATGCTGTAAAAATAACCCTCCTTCCTTGATAGATTTCACTTGAGTGAAAATAACCCTT	intergenic							5.75061	7.79473
ASHGA5P057241	0.0163419	0.0597024	4.11915	down	noncoding	TCONS_00014901	XLOC_006972	LincRNAs identified by Cabili et al	209	chr8	-	1236887	1237155	ACTAGTTCCCCTCCTAACAGAACCACACACACACACACACACTGAACCAAAACTAGTTCC	intergenic							10.2456	12.2879
ASHGA5P056123	0.0159769	0.0588253	4.10837	down	noncoding	TCONS_00026991	XLOC_013040	LincRNAs identified by Cabili et al	1013	chr19	+	32593957	32595580	ATGGCTGGTTTGGAATGGCAAATCCATCACTCTCTTTGCCTGTAAAATGCCAAGGAGACT	intergenic							4.13444	6.17301
ASHGA5P032912	0.00701474	0.0421937	4.10765	down	noncoding	ENST00000584365	RP11-160E2.21	GENCODE	191	chr17	+	19053591	19054599	ATTGTTTTAGTAAACAGACACAACCTTGGCTTCAGGTCTTTTTTGTTTTCTGTCACCCAG	intron sense-overlapping	NM_001129778	GRAPL	GRB2-related adapter protein-like	+	19030781	19062148	4.70558	6.74389
ASHGA5P046166	0.0043405	0.0384276	4.103	down	noncoding	TCONS_00001446	XLOC_000768	LincRNAs identified by Cabili et al	726	chr1	-	31168511	31181236	ACCACGGTGGAATTATGTGGTTTGAATGGGGCCGGAATGGCTGGCTTTGAGGCTGCTAGG	intergenic							2.97642	5.0131
ASHGA5P032346	0.00606022	0.0406656	4.09876	down	noncoding	ENST00000581727	CTC-304I17.3	GENCODE	536	chr17	-	32445365	32445901	CTCCTCCAACCCCACTCCCAGCACATACACATGAAAGAAAATAAAGAAAAAGAAAAAACA	intron sense-overlapping	NM_001094	ASIC2	acid-sensing ion channel 2 isoform MDEG1	-	31340105	32483825	8.17784	10.213
ASHGA5P017111	0.00500328	0.0392352	4.0835	down	noncoding	uc002tss.3	LOC389043	UCSC_knowngene	1040	chr2	+	132160473	132165801	ATTCCAGACCATTCCTGTGTGCACCCTGGCAGGGAGCCATCTGAAGATTTCAGGGACCAC	intergenic							8.09136	10.1212
ASHGA5P051906	0.00980656	0.0464941	4.07818	down	noncoding	ENST00000506425	RP11-412P11.1	GENCODE	957	chr4	+	23004775	23043141	CTAGACTTTTTTTTAGGGTGATTGGGTCATTGTTTTTTCTCCTGGAACCCTGAGTCCTCA	intergenic							5.16195	7.18987
ASHGA5P040100	0.00543992	0.0400959	4.06785	down	noncoding	ENST00000511919	RP11-93L9.1	GENCODE	590	chr4	+	124571445	124851509	ATGAACAAGAAAGAGGACGTCTTATTATCTGGTGTCTGGCTTGCTGATTTAATAACCTAG	intergenic							3.07803	5.1023
ASHGA5P028264	0.00153553	0.0285017	4.02614	down	noncoding	ENST00000542331	RP11-443D10.2	GENCODE	560	chr12	+	109541771	109545809	GCTTCCACTCTTTCTCTTAAAGGAACTACTAAATACAGTGTCTTGGGTATTTTTCTAAAG	intron sense-overlapping	NM_003362	UNG	uracil-DNA glycosylase isoform UNG1 precursor	+	109535922	109548798	3.11162	5.12102
ASHGA5P028264	0.00153553	0.0285017	4.02614	down	noncoding	ENST00000542331	RP11-443D10.2	GENCODE	560	chr12	+	109541771	109545809	GCTTCCACTCTTTCTCTTAAAGGAACTACTAAATACAGTGTCTTGGGTATTTTTCTAAAG	intron sense-overlapping	NM_080911	UNG	uracil-DNA glycosylase isoform UNG2	+	109535398	109548798	3.11162	5.12102
ASHGA5P047810	0.0136566	0.054046	4.02579	down	noncoding	uc001lsr.1	AX747537	UCSC_knowngene	701	chr11	-	881475	882176	GTGCCCAACCTGCCATTAATCCCATCCATCCTGAGCCCGACGTGGTCATTTCTCTCACCA	intron sense-overlapping	NM_001142674	CHID1	chitinase domain-containing protein 1 isoform a precursor	-	867858	910874	6.70857	8.71785
ASHGA5P047810	0.0136566	0.054046	4.02579	down	noncoding	uc001lsr.1	AX747537	UCSC_knowngene	701	chr11	-	881475	882176	GTGCCCAACCTGCCATTAATCCCATCCATCCTGAGCCCGACGTGGTCATTTCTCTCACCA	intron sense-overlapping	NM_001142675	CHID1	chitinase domain-containing protein 1 isoform a precursor	-	867858	915058	6.70857	8.71785
ASHGA5P047810	0.0136566	0.054046	4.02579	down	noncoding	uc001lsr.1	AX747537	UCSC_knowngene	701	chr11	-	881475	882176	GTGCCCAACCTGCCATTAATCCCATCCATCCTGAGCCCGACGTGGTCATTTCTCTCACCA	intron sense-overlapping	NM_001142676	CHID1	chitinase domain-containing protein 1 isoform b precursor	-	867858	910874	6.70857	8.71785
ASHGA5P047810	0.0136566	0.054046	4.02579	down	noncoding	uc001lsr.1	AX747537	UCSC_knowngene	701	chr11	-	881475	882176	GTGCCCAACCTGCCATTAATCCCATCCATCCTGAGCCCGACGTGGTCATTTCTCTCACCA	intron sense-overlapping	NM_001142677	CHID1	chitinase domain-containing protein 1 isoform c precursor	-	867858	910874	6.70857	8.71785
ASHGA5P047810	0.0136566	0.054046	4.02579	down	noncoding	uc001lsr.1	AX747537	UCSC_knowngene	701	chr11	-	881475	882176	GTGCCCAACCTGCCATTAATCCCATCCATCCTGAGCCCGACGTGGTCATTTCTCTCACCA	intron sense-overlapping	NM_023947	CHID1	chitinase domain-containing protein 1 isoform a precursor	-	867858	910874	6.70857	8.71785
ASHGA5P041201	0.00128289	0.027164	4.0116	down	noncoding	ENST00000396880	ATG10-IT1	GENCODE	487	chr5	+	81287813	81288300	ATATTGTCCCTCATACCTTCAGGTTTTATGGTCACTCATACAATCACTTTGGCACCATCC	intron sense-overlapping	NM_001131028	ATG10	ubiquitin-like-conjugating enzyme ATG10	+	81267843	81551216	4.5936	6.59778
ASHGA5P041201	0.00128289	0.027164	4.0116	down	noncoding	ENST00000396880	ATG10-IT1	GENCODE	487	chr5	+	81287813	81288300	ATATTGTCCCTCATACCTTCAGGTTTTATGGTCACTCATACAATCACTTTGGCACCATCC	intron sense-overlapping	NM_031482	ATG10	ubiquitin-like-conjugating enzyme ATG10	+	81267843	81551216	4.5936	6.59778
ASHGA5P023257	0.0147586	0.0562233	4.01114	down	noncoding	ENST00000576197	RP11-1197K16.2	GENCODE	401	chr17	+	80938957	80939614	AGGAAATGAGGCTGGCTGAAAAATCACAAGAAATGTTACACAAGTTAGACAATGTGACCT	intronic antisense	NM_001009905	B3GNTL1	UDP-GlcNAc:betaGal beta-1,3-N-acetylglucosaminyltransferase-like protein 1	-	80901666	81009686	3.09644	5.10045
ASHGA5P031794	0.00180617	0.0298471	4.01087	down	noncoding	ENST00000562822	RP11-355E10.1	GENCODE	459	chr16	+	56143448	56170655	CCTCTCCTTTCACAAGATGCTATTGTAAATTCAGGCTGCTTTAATCTCTGTGATTAAAAA	intergenic							3.46512	5.46903
ASHGA5P039882	0.00777464	0.0433457	4.0103	down	noncoding	ENST00000508199	RP11-103J17.1	GENCODE	538	chr4	+	37080198	37127046	GAATTACACATTTAAGAATCTACCTTATTGGGAAAAATACAGTCAAAGATTTTATAGAAA	intergenic							3.34948	5.35319
ASHGA5P021236	0.0370126	0.0973733	3.99921	down	noncoding	NR_037646	TMX2-CTNND1	RefSeq	6251	chr11	+	57479994	57586652	ATGAAGAACCGCAGATCCACTCTCTCCTTCCTGCTTCCTCCTTGCTGTGGTGGCTGGGAT	exon sense-overlapping	NM_001085458	CTNND1	catenin delta-1 isoform 1ABC	+	57529233	57586652	7.79247	9.79218
ASHGA5P021236	0.0370126	0.0973733	3.99921	down	noncoding	NR_037646	TMX2-CTNND1	RefSeq	6251	chr11	+	57479994	57586652	ATGAAGAACCGCAGATCCACTCTCTCCTTCCTGCTTCCTCCTTGCTGTGGTGGCTGGGAT	exon sense-overlapping	NM_001085459	CTNND1	catenin delta-1 isoform 1AB	+	57529233	57586652	7.79247	9.79218
ASHGA5P021236	0.0370126	0.0973733	3.99921	down	noncoding	NR_037646	TMX2-CTNND1	RefSeq	6251	chr11	+	57479994	57586652	ATGAAGAACCGCAGATCCACTCTCTCCTTCCTGCTTCCTCCTTGCTGTGGTGGCTGGGAT	exon sense-overlapping	NM_001085460	CTNND1	catenin delta-1 isoform 1A	+	57529233	57586652	7.79247	9.79218
ASHGA5P021236	0.0370126	0.0973733	3.99921	down	noncoding	NR_037646	TMX2-CTNND1	RefSeq	6251	chr11	+	57479994	57586652	ATGAAGAACCGCAGATCCACTCTCTCCTTCCTGCTTCCTCCTTGCTGTGGTGGCTGGGAT	exon sense-overlapping	NM_001085461	CTNND1	catenin delta-1 isoform 1A	+	57529233	57586652	7.79247	9.79218
ASHGA5P021236	0.0370126	0.0973733	3.99921	down	noncoding	NR_037646	TMX2-CTNND1	RefSeq	6251	chr11	+	57479994	57586652	ATGAAGAACCGCAGATCCACTCTCTCCTTCCTGCTTCCTCCTTGCTGTGGTGGCTGGGAT	exon sense-overlapping	NM_001085462	CTNND1	catenin delta-1 isoform 1A	+	57529233	57586652	7.79247	9.79218
ASHGA5P021236	0.0370126	0.0973733	3.99921	down	noncoding	NR_037646	TMX2-CTNND1	RefSeq	6251	chr11	+	57479994	57586652	ATGAAGAACCGCAGATCCACTCTCTCCTTCCTGCTTCCTCCTTGCTGTGGTGGCTGGGAT	exon sense-overlapping	NM_001085463	CTNND1	catenin delta-1 isoform 3ABC	+	57529233	57586652	7.79247	9.79218
ASHGA5P021236	0.0370126	0.0973733	3.99921	down	noncoding	NR_037646	TMX2-CTNND1	RefSeq	6251	chr11	+	57479994	57586652	ATGAAGAACCGCAGATCCACTCTCTCCTTCCTGCTTCCTCCTTGCTGTGGTGGCTGGGAT	exon sense-overlapping	NM_001085464	CTNND1	catenin delta-1 isoform 3AB	+	57529233	57586652	7.79247	9.79218
ASHGA5P021236	0.0370126	0.0973733	3.99921	down	noncoding	NR_037646	TMX2-CTNND1	RefSeq	6251	chr11	+	57479994	57586652	ATGAAGAACCGCAGATCCACTCTCTCCTTCCTGCTTCCTCCTTGCTGTGGTGGCTGGGAT	exon sense-overlapping	NM_001085465	CTNND1	catenin delta-1 isoform 3B	+	57529233	57586652	7.79247	9.79218
ASHGA5P021236	0.0370126	0.0973733	3.99921	down	noncoding	NR_037646	TMX2-CTNND1	RefSeq	6251	chr11	+	57479994	57586652	ATGAAGAACCGCAGATCCACTCTCTCCTTCCTGCTTCCTCCTTGCTGTGGTGGCTGGGAT	exon sense-overlapping	NM_001085466	CTNND1	catenin delta-1 isoform 3AC	+	57529233	57586652	7.79247	9.79218
ASHGA5P021236	0.0370126	0.0973733	3.99921	down	noncoding	NR_037646	TMX2-CTNND1	RefSeq	6251	chr11	+	57479994	57586652	ATGAAGAACCGCAGATCCACTCTCTCCTTCCTGCTTCCTCCTTGCTGTGGTGGCTGGGAT	exon sense-overlapping	NM_001085467	CTNND1	catenin delta-1 isoform 3A	+	57529233	57586652	7.79247	9.79218
ASHGA5P021236	0.0370126	0.0973733	3.99921	down	noncoding	NR_037646	TMX2-CTNND1	RefSeq	6251	chr11	+	57479994	57586652	ATGAAGAACCGCAGATCCACTCTCTCCTTCCTGCTTCCTCCTTGCTGTGGTGGCTGGGAT	exon sense-overlapping	NM_001085468	CTNND1	catenin delta-1 isoform 3A	+	57529233	57586652	7.79247	9.79218
ASHGA5P021236	0.0370126	0.0973733	3.99921	down	noncoding	NR_037646	TMX2-CTNND1	RefSeq	6251	chr11	+	57479994	57586652	ATGAAGAACCGCAGATCCACTCTCTCCTTCCTGCTTCCTCCTTGCTGTGGTGGCTGGGAT	exon sense-overlapping	NM_001085469	CTNND1	catenin delta-1 isoform 3A	+	57529233	57586652	7.79247	9.79218
ASHGA5P021236	0.0370126	0.0973733	3.99921	down	noncoding	NR_037646	TMX2-CTNND1	RefSeq	6251	chr11	+	57479994	57586652	ATGAAGAACCGCAGATCCACTCTCTCCTTCCTGCTTCCTCCTTGCTGTGGTGGCTGGGAT	exon sense-overlapping	NM_001144012	TMX2	thioredoxin-related transmembrane protein 2 isoform 2	+	57479994	57508445	7.79247	9.79218
ASHGA5P021236	0.0370126	0.0973733	3.99921	down	noncoding	NR_037646	TMX2-CTNND1	RefSeq	6251	chr11	+	57479994	57586652	ATGAAGAACCGCAGATCCACTCTCTCCTTCCTGCTTCCTCCTTGCTGTGGTGGCTGGGAT	exon sense-overlapping	NM_001206883	CTNND1	catenin delta-1 isoform 2ABC	+	57529233	57586652	7.79247	9.79218
ASHGA5P021236	0.0370126	0.0973733	3.99921	down	noncoding	NR_037646	TMX2-CTNND1	RefSeq	6251	chr11	+	57479994	57586652	ATGAAGAACCGCAGATCCACTCTCTCCTTCCTGCTTCCTCCTTGCTGTGGTGGCTGGGAT	exon sense-overlapping	NM_001206884	CTNND1	catenin delta-1 isoform 2AC	+	57529233	57586652	7.79247	9.79218
ASHGA5P021236	0.0370126	0.0973733	3.99921	down	noncoding	NR_037646	TMX2-CTNND1	RefSeq	6251	chr11	+	57479994	57586652	ATGAAGAACCGCAGATCCACTCTCTCCTTCCTGCTTCCTCCTTGCTGTGGTGGCTGGGAT	exon sense-overlapping	NM_001206885	CTNND1	catenin delta-1 isoform 1AC	+	57529233	57586652	7.79247	9.79218
ASHGA5P021236	0.0370126	0.0973733	3.99921	down	noncoding	NR_037646	TMX2-CTNND1	RefSeq	6251	chr11	+	57479994	57586652	ATGAAGAACCGCAGATCCACTCTCTCCTTCCTGCTTCCTCCTTGCTGTGGTGGCTGGGAT	exon sense-overlapping	NM_001206886	CTNND1	catenin delta-1 isoform 2AB	+	57529233	57586652	7.79247	9.79218
ASHGA5P021236	0.0370126	0.0973733	3.99921	down	noncoding	NR_037646	TMX2-CTNND1	RefSeq	6251	chr11	+	57479994	57586652	ATGAAGAACCGCAGATCCACTCTCTCCTTCCTGCTTCCTCCTTGCTGTGGTGGCTGGGAT	exon sense-overlapping	NM_001206887	CTNND1	catenin delta-1 isoform 2B	+	57529233	57586652	7.79247	9.79218
ASHGA5P021236	0.0370126	0.0973733	3.99921	down	noncoding	NR_037646	TMX2-CTNND1	RefSeq	6251	chr11	+	57479994	57586652	ATGAAGAACCGCAGATCCACTCTCTCCTTCCTGCTTCCTCCTTGCTGTGGTGGCTGGGAT	exon sense-overlapping	NM_001206888	CTNND1	catenin delta-1 isoform 2A	+	57529233	57586652	7.79247	9.79218
ASHGA5P021236	0.0370126	0.0973733	3.99921	down	noncoding	NR_037646	TMX2-CTNND1	RefSeq	6251	chr11	+	57479994	57586652	ATGAAGAACCGCAGATCCACTCTCTCCTTCCTGCTTCCTCCTTGCTGTGGTGGCTGGGAT	exon sense-overlapping	NM_001206889	CTNND1	catenin delta-1 isoform 2A	+	57529233	57586652	7.79247	9.79218
ASHGA5P021236	0.0370126	0.0973733	3.99921	down	noncoding	NR_037646	TMX2-CTNND1	RefSeq	6251	chr11	+	57479994	57586652	ATGAAGAACCGCAGATCCACTCTCTCCTTCCTGCTTCCTCCTTGCTGTGGTGGCTGGGAT	exon sense-overlapping	NM_001206890	CTNND1	catenin delta-1 isoform 3A	+	57529233	57586652	7.79247	9.79218
ASHGA5P021236	0.0370126	0.0973733	3.99921	down	noncoding	NR_037646	TMX2-CTNND1	RefSeq	6251	chr11	+	57479994	57586652	ATGAAGAACCGCAGATCCACTCTCTCCTTCCTGCTTCCTCCTTGCTGTGGTGGCTGGGAT	exon sense-overlapping	NM_001206891	CTNND1	catenin delta-1 isoform 2A	+	57529233	57586652	7.79247	9.79218
ASHGA5P021236	0.0370126	0.0973733	3.99921	down	noncoding	NR_037646	TMX2-CTNND1	RefSeq	6251	chr11	+	57479994	57586652	ATGAAGAACCGCAGATCCACTCTCTCCTTCCTGCTTCCTCCTTGCTGTGGTGGCTGGGAT	exon sense-overlapping	NM_001331	CTNND1	catenin delta-1 isoform 1B	+	57529233	57586652	7.79247	9.79218
ASHGA5P021236	0.0370126	0.0973733	3.99921	down	noncoding	NR_037646	TMX2-CTNND1	RefSeq	6251	chr11	+	57479994	57586652	ATGAAGAACCGCAGATCCACTCTCTCCTTCCTGCTTCCTCCTTGCTGTGGTGGCTGGGAT	exon sense-overlapping	NM_015959	TMX2	thioredoxin-related transmembrane protein 2 isoform 1 precursor	+	57479994	57508445	7.79247	9.79218
ASHGA5P021236	0.0370126	0.0973733	3.99921	down	noncoding	NR_037646	TMX2-CTNND1	RefSeq	6251	chr11	+	57479994	57586652	ATGAAGAACCGCAGATCCACTCTCTCCTTCCTGCTTCCTCCTTGCTGTGGTGGCTGGGAT	intron sense-overlapping	NM_170746	C11orf31	selenoprotein H	+	57508721	57510883	7.79247	9.79218
ASHGA5P021236	0.0370126	0.0973733	3.99921	down	noncoding	NR_037646	TMX2-CTNND1	RefSeq	6251	chr11	+	57479994	57586652	ATGAAGAACCGCAGATCCACTCTCTCCTTCCTGCTTCCTCCTTGCTGTGGTGGCTGGGAT	intronic antisense	NM_001145101	BTBD18	BTB/POZ domain-containing protein 18	-	57510985	57519253	7.79247	9.79218
ASHGA5P023151	0.000516299	0.0196727	3.99689	down	noncoding	ENST00000574387	RP11-473M20.9	GENCODE	677	chr16	-	3128320	3137088	CTCAGAAATGCGCCGCTGGGTTAGGGTCTCCCCGACCGAGGCTCGAATCCAGGTCGAAGG	intronic antisense	ENST00000525377	IL32	interleukin 32 [Source:HGNC Symbol;Acc:16830]	+	3115641	3131908	4.81536	6.81423
ASHGA5P058913	0.00884027	0.044869	3.98636	down	noncoding	uc.156-	uc.156	UCR	213	chr5	-	76935418	76935631	TGTTGTTGGCTGGCTCTGAAAAATCAGAACATTAGAAATGGTTCGCTTCACTTGTGCAAA	intron sense-overlapping	ENST00000306422	OTP	orthopedia homeobox [Source:HGNC Symbol;Acc:8518]	-	76924537	76935513	5.02794	7.02302
ASHGA5P047252	0.013352	0.0533213	3.97458	down	noncoding	ENST00000420825	RP1-251M9.2	GENCODE	537	chr10	+	11002113	11012779	CTTGTAGAAATCCTTGACTCACCTCTTCATTCCAAATTAGCAAAATGAGCAACATGTAAT	intergenic							4.10039	6.09119
ASHGA5P029383	0.0288026	0.0826941	3.9724	down	noncoding	TCONS_00010258	XLOC_004724	LincRNAs identified by Cabili et al	231	chr5	-	6359188	6362527	TTTGCTTTTTTCGTTTGAAATACCTTTGCAAATCTTTGTCAGCAGGGGCAGGCTGGCAGG	intergenic							3.77785	5.76786
ASHGA5P026308	0.0047008	0.0390427	3.97239	down	noncoding	TCONS_00013683	XLOC_006345	LincRNAs identified by Cabili et al	292	chr7	-	4645445	4646569	GGGAGGCATTGGACACCCACACACACACAGCAGACAAACTCCTCAGATGTGGACTTGAAG	intergenic							6.36365	8.35366
ASHGA5P022992	0.00311703	0.0358067	3.95491	down	noncoding	ENST00000567230	RP11-299H22.5	GENCODE	589	chr15	-	62555442	62558483	AGTGGCATTTGAGGCTGGCTTGAAGATTTAAGGTGAAACCAAGTGAGTGTCTCCTATTGG	intergenic							4.20851	6.19215
ASHGA5P040862	2.9004e-07	0.00133723	3.94959	down	noncoding	ENST00000522956	CTB-78F1.1	GENCODE	1124	chr5	-	167080232	167087486	CTGGGGATGCAAAAATAAAAGTTCAATAAGTATGCCTTTAAATACGGACCAGATACTGAA	intronic antisense	NM_001122679	ODZ2	teneurin-2	+	166711842	167691162	2.6899	4.6716
ASHGA5P044499	0.00635441	0.0410595	3.94332	down	noncoding	TCONS_00018433	XLOC_008729	LincRNAs identified by Cabili et al	596	chr10	-	10461499	10504510	GGTGGTTAAATTAGCGTGCTGGAATCTTTTCAGTTTGTCGCAGAGTAGAAAAATAAAAAA	intergenic							3.53161	5.51103
ASHGA5P048140	2.7095e-05	0.00861233	3.93003	down	noncoding	ENST00000532845	AP001258.4	GENCODE	516	chr11	-	58903397	58907588	TTGCCCAGCCCTCACTTCTCTTGGACAGAGCTTGAGCCTTCTGGGAAACTGCTTTTCCCT	intergenic							8.19794	10.1725
ASHGA5P030121	0.00107816	0.0258808	3.92009	down	noncoding	ENST00000558702	RP11-253M7.4	GENCODE	391	chr15	-	69750860	69754145	GCAAAAGGGAAGTAACAAGTATTGAATGTTCACTTACCTCTTTCATTCCCCAATATGAAA	intergenic							4.75379	6.72467
ASHGA5P057044	0.00950195	0.0461336	3.92007	down	noncoding	TCONS_00012235	XLOC_005792	LincRNAs identified by Cabili et al	453	chr6	-	104785423	104786550	AATTTCTGAGGCTTGGCAGGGTGGCTTCTTGATGTTGAAGTGCTGAAAATGCTGATTTTT	intergenic							4.02162	5.9925
ASHGA5P056519	0.00178675	0.0295805	3.90696	down	noncoding	TCONS_00004432	XLOC_002302	LincRNAs identified by Cabili et al	1424	chr2	-	123561296	123567020	AAATATACCAGTACATAGACCTGGAACCAAACCCAGAACTTCACTTCCCTGTGCCAGAAG	intergenic							7.71156	9.67761
ASHGA5P056387	0.0374271	0.0979885	3.90432	down	noncoding	TCONS_00003845	XLOC_001650	LincRNAs identified by Cabili et al	846	chr2	+	123247932	123262758	GAGAGCCTGGTTACTTGCTTTCTTTCAAGCATGCTTTGTGCTTTCCTTCTCCATTAATTT	intergenic							3.4042	5.36928
ASHGA5P044296	0.0181973	0.0632958	3.90393	down	noncoding	uc003xut.3	BC047540	UCSC_knowngene	2744	chr8	-	62671658	62678528	TGTCAAAGATACCTGTCTCCCTCTCTTTCATTCTCTTTACCTTTCCATCAGACTATGTGG	intergenic							7.31591	9.28083
ASHGA5P047569	0.00289243	0.0349556	3.89076	down	noncoding	TCONS_00014180	XLOC_006188	LincRNAs identified by Cabili et al	313	chr7	+	99597122	99609247	CATGCCCGGCCCTCCCTTTCTTTTGTGTCTTTGGATTTGTCTTTGTGGAGAGGGTACCAG	intergenic							7.58326	9.54331
ASHGA5P031117	0.00778624	0.0433457	3.88295	down	noncoding	ENST00000561541	RP11-19N8.4	GENCODE	821	chr16	-	33054929	33102910	GTGGTGTACAGGCATAGAATGTCTTTACTGGATCATTGAAATAGTAAGGTAAATTGAACT	intergenic							4.06462	6.02177
ASHGA5P054974	0.0102935	0.0473891	3.88105	down	noncoding	TCONS_00010239	XLOC_004700	LincRNAs identified by Cabili et al	1175	chr5	-	1045830	1047475	CTCACACACTAACCCACTCATTCACACACTAACCCACTCGTTCACACACCCATTCACACT	intergenic							6.37169	8.32814
ASHGA5P026193	0.00714548	0.0425018	3.87267	down	noncoding	ENST00000532930	RP11-318C2.1	GENCODE	850	chr11	+	8790324	8807318	CCCTCATACACATTCAGAAGGCCAAGGAAACACCCTCAGGATTGAACTATGATAAAGAAG	intronic antisense	NM_005418	ST5	suppression of tumorigenicity 5 protein isoform 1	-	8714898	8932498	4.36397	6.3173
ASHGA5P026193	0.00714548	0.0425018	3.87267	down	noncoding	ENST00000532930	RP11-318C2.1	GENCODE	850	chr11	+	8790324	8807318	CCCTCATACACATTCAGAAGGCCAAGGAAACACCCTCAGGATTGAACTATGATAAAGAAG	intronic antisense	NM_139157	ST5	suppression of tumorigenicity 5 protein isoform 2	-	8714898	8832882	4.36397	6.3173
ASHGA5P026193	0.00714548	0.0425018	3.87267	down	noncoding	ENST00000532930	RP11-318C2.1	GENCODE	850	chr11	+	8790324	8807318	CCCTCATACACATTCAGAAGGCCAAGGAAACACCCTCAGGATTGAACTATGATAAAGAAG	intronic antisense	NM_213618	ST5	suppression of tumorigenicity 5 protein isoform 1	-	8714898	8832224	4.36397	6.3173
ASHGA5P029724	0.00680348	0.0419474	3.87001	down	noncoding	ENST00000554631	DICER1-AS1	GENCODE	1702	chr14	+	95623981	95646263	GTGGGAATTAAATAAGTGGCTGGCTTAAAGAACATCTTCTTAATTTATCCCCAAATGTAG	natural antisense	ENST00000526495	DICER1	dicer 1, ribonuclease type III [Source:HGNC Symbol;Acc:17098]	-	95552564	95624347	4.18918	6.14152
ASHGA5P029724	0.00680348	0.0419474	3.87001	down	noncoding	ENST00000554631	DICER1-AS1	GENCODE	1702	chr14	+	95623981	95646263	GTGGGAATTAAATAAGTGGCTGGCTTAAAGAACATCTTCTTAATTTATCCCCAAATGTAG	natural antisense	ENST00000527865	DICER1	dicer 1, ribonuclease type III [Source:HGNC Symbol;Acc:17098]	-	95599756	95624347	4.18918	6.14152
ASHGA5P045787	0.00267602	0.03424	3.86634	down	noncoding	ENST00000531661	RP11-522I20.3	GENCODE	1017	chr9	+	86323232	86328293	TCCCTTGCCTCTCTGTCTACTCTGCGTTCCCCGCTGGGAGGAGGGTCTGGTGATAAAATA	bidirectional	NM_013438	UBQLN1	ubiquilin-1 isoform 1	-	86274877	86323168	7.68424	9.63521
ASHGA5P045787	0.00267602	0.03424	3.86634	down	noncoding	ENST00000531661	RP11-522I20.3	GENCODE	1017	chr9	+	86323232	86328293	TCCCTTGCCTCTCTGTCTACTCTGCGTTCCCCGCTGGGAGGAGGGTCTGGTGATAAAATA	bidirectional	NM_053067	UBQLN1	ubiquilin-1 isoform 2	-	86274877	86323168	7.68424	9.63521
ASHGA5P034597	0.0304613	0.0857086	3.86124	down	noncoding	TCONS_00003661	XLOC_001448	LincRNAs identified by Cabili et al	481	chr2	+	43357102	43358647	ATTATCTTTGTCCACAGTGTTTGGTGTGTGTTTGTGGGGTGTGTCAGGTGATTTTCCTGC	intergenic							5.19798	7.14705
ASHGA5P056199	0.0205455	0.0680486	3.85357	down	noncoding	TCONS_00000959	XLOC_000218	LincRNAs identified by Cabili et al	297	chr1	+	59180599	59181440	TTCATCCATCCTGCAGCTTCTACATTGTTCTTCATCTCTGGGAAATCAGTGACCCATGGA	intergenic							4.55663	6.50282
ASHGA5P031918	0.0428336	0.106608	3.84447	down	noncoding	ENST00000561669	AC009120.10	GENCODE	475	chr16	+	74316312	74321417	GCTAACCTTCCTTCACAAGCCACCACATGCTGATTACATAGGAAAAAATAACTTTTAAAA	intergenic							4.12264	6.06543
ASHGA5P058935	0.0197943	0.0664688	3.8435	down	noncoding	uc.329-	uc.329	UCR	307	chr11	-	32197991	32198298	CCTGGCTGGCTAATGGGCTTATCAAAATTCATGATGTAATAAGAAGGCCGACAAGTGCAT	intergenic							5.51025	7.45267
ASHGA5P055873	0.0193265	0.0655502	3.84015	down	noncoding	ENST00000546734	CTD-2314B22.1	GENCODE	787	chr14	+	19606384	19643377	ATCCTTCTCCATCCAGTATTGGGGGTCTTCCTCCTCCATCCAGGACTTGGGGGTCATCCT	intergenic							7.10195	9.04311
ASHGA5P022177	0.00542186	0.0400959	3.81638	down	noncoding	ENST00000551401	RP11-121G22.3	GENCODE	792	chr12	+	81676462	81706188	CCAGTCATTGGTCAGAGGCAGTGCAGCTTGTGTTACAACTCAAAAGAGTAATACTCTGAA	intronic antisense	NM_001220473	PPFIA2	liprin-alpha-2 isoform b	-	81652044	82152474	3.82227	5.75448
ASHGA5P022177	0.00542186	0.0400959	3.81638	down	noncoding	ENST00000551401	RP11-121G22.3	GENCODE	792	chr12	+	81676462	81706188	CCAGTCATTGGTCAGAGGCAGTGCAGCTTGTGTTACAACTCAAAAGAGTAATACTCTGAA	intronic antisense	NM_001220474	PPFIA2	liprin-alpha-2 isoform c	-	81652044	82152474	3.82227	5.75448
ASHGA5P022177	0.00542186	0.0400959	3.81638	down	noncoding	ENST00000551401	RP11-121G22.3	GENCODE	792	chr12	+	81676462	81706188	CCAGTCATTGGTCAGAGGCAGTGCAGCTTGTGTTACAACTCAAAAGAGTAATACTCTGAA	intronic antisense	NM_001220475	PPFIA2	liprin-alpha-2 isoform d	-	81652044	82152286	3.82227	5.75448
ASHGA5P022177	0.00542186	0.0400959	3.81638	down	noncoding	ENST00000551401	RP11-121G22.3	GENCODE	792	chr12	+	81676462	81706188	CCAGTCATTGGTCAGAGGCAGTGCAGCTTGTGTTACAACTCAAAAGAGTAATACTCTGAA	intronic antisense	NM_001220476	PPFIA2	liprin-alpha-2 isoform e	-	81652044	82152286	3.82227	5.75448
ASHGA5P022177	0.00542186	0.0400959	3.81638	down	noncoding	ENST00000551401	RP11-121G22.3	GENCODE	792	chr12	+	81676462	81706188	CCAGTCATTGGTCAGAGGCAGTGCAGCTTGTGTTACAACTCAAAAGAGTAATACTCTGAA	intronic antisense	NM_001220477	PPFIA2	liprin-alpha-2 isoform f	-	81652044	81992150	3.82227	5.75448
ASHGA5P022177	0.00542186	0.0400959	3.81638	down	noncoding	ENST00000551401	RP11-121G22.3	GENCODE	792	chr12	+	81676462	81706188	CCAGTCATTGGTCAGAGGCAGTGCAGCTTGTGTTACAACTCAAAAGAGTAATACTCTGAA	intronic antisense	NM_001220478	PPFIA2	liprin-alpha-2 isoform g	-	81652044	81992150	3.82227	5.75448
ASHGA5P022177	0.00542186	0.0400959	3.81638	down	noncoding	ENST00000551401	RP11-121G22.3	GENCODE	792	chr12	+	81676462	81706188	CCAGTCATTGGTCAGAGGCAGTGCAGCTTGTGTTACAACTCAAAAGAGTAATACTCTGAA	intronic antisense	NM_001220479	PPFIA2	liprin-alpha-2 isoform h	-	81652044	81763193	3.82227	5.75448
ASHGA5P022177	0.00542186	0.0400959	3.81638	down	noncoding	ENST00000551401	RP11-121G22.3	GENCODE	792	chr12	+	81676462	81706188	CCAGTCATTGGTCAGAGGCAGTGCAGCTTGTGTTACAACTCAAAAGAGTAATACTCTGAA	intronic antisense	NM_001220480	PPFIA2	liprin-alpha-2 isoform i	-	81652044	81763193	3.82227	5.75448
ASHGA5P022177	0.00542186	0.0400959	3.81638	down	noncoding	ENST00000551401	RP11-121G22.3	GENCODE	792	chr12	+	81676462	81706188	CCAGTCATTGGTCAGAGGCAGTGCAGCTTGTGTTACAACTCAAAAGAGTAATACTCTGAA	intronic antisense	NM_003625	PPFIA2	liprin-alpha-2 isoform a	-	81652044	82153109	3.82227	5.75448
ASHGA5P017120	0.00291745	0.0350032	3.81466	down	noncoding	ENST00000437825	RP1-251M9.3	GENCODE	244	chr10	-	11052126	11053082	TATGCCCTTCCCAAAATTGGCACTGCAAGACATGATACCTTAAAGGCATCTCCAAATGAG	intronic antisense	NM_001025077	CELF2	CUGBP Elav-like family member 2 isoform 3	+	11047258	11378672	5.015	6.94655
ASHGA5P030196	0.00540407	0.0400885	3.80781	down	noncoding	uc021ssx.1	LOC440297	UCSC_knowngene	6806	chr15	-	82970478	82986427	TCACTCCCTATGGTGTCTGTCTGTCCTGAGAGGTGGATGAATTGAAGCTCTAGTTTCTCT	intergenic							4.86565	6.79461
ASHGA5P043223	0.00898468	0.0450829	3.78901	down	noncoding	ENST00000417409	RP11-161I10.1	GENCODE	506	chr1	+	190449508	190463427	GGTCACCTTGCTTTCTTTGCTCTTGATTGTTTTCTAGCCCTACTTCTGTGACTACATTAA	intergenic							5.24596	7.16777
ASHGA5P040273	0.00331985	0.0361534	3.78854	down	noncoding	ENST00000503677	RP11-91J3.3	GENCODE	536	chr4	+	188334717	188336851	GGATTATGAACTAAAGTCAGTGTTGCAGGAAATGTCACCTGTCCTTTGAAAGAAAATAAT	intergenic							2.76109	4.68274
ASHGA5P039466	0.00756646	0.0431213	3.78094	down	noncoding	ENST00000564925	RP11-109G23.3	GENCODE	2320	chr4	-	79694807	79697127	TGGGCCTGATATAACTTCACCTGATCACAACAAGCCTGCTATAATAAGTTTCAAAGTTAG	bidirectional	NM_017593	BMP2K	BMP-2-inducible protein kinase isoform b	+	79697531	79800594	5.00182	6.92056
ASHGA5P039466	0.00756646	0.0431213	3.78094	down	noncoding	ENST00000564925	RP11-109G23.3	GENCODE	2320	chr4	-	79694807	79697127	TGGGCCTGATATAACTTCACCTGATCACAACAAGCCTGCTATAATAAGTTTCAAAGTTAG	bidirectional	NM_198892	BMP2K	BMP-2-inducible protein kinase isoform a	+	79697531	79833341	5.00182	6.92056
ASHGA5P031615	0.0127775	0.0523404	3.76102	down	noncoding	ENST00000570080	CTD-2270L9.4	GENCODE	730	chr16	+	23464078	23468909	ATCCACTCCTTCACGTCGAAGTCGTCTGCCAGGAACTTGGAGAAGTCCATGGCGGAACTG	natural antisense	NM_153603	COG7	conserved oligomeric Golgi complex subunit 7	-	23399813	23464512	5.48421	7.39534
ASHGA5P035970	0.0373064	0.0979079	3.75991	down	noncoding	TCONS_00026830	XLOC_013047	LincRNAs identified by Cabili et al	3105	chr19	+	35414102	35417732	TTTGTTTTTGCTTTTTCTGACCTGGTGTGTTAATGCCCTGGGTTGGCCCTCTAAGAAGCT	intergenic							5.6326	7.5433
ASHGA5P054953	0.00882259	0.044869	3.75891	down	noncoding	TCONS_00008386	XLOC_003839	LincRNAs identified by Cabili et al	205	chr4	+	190197916	190198269	ATCATGGGAATCTTGCACATGTTACAGGGAAGCACTGTCCTACATCATATGTGACAGGCT	intergenic							3.95817	5.86849
ASHGA5P053355	0.0272299	0.0799892	3.75691	down	noncoding	ENST00000486094	RP4-798C17.6	GENCODE	819	chr7	-	144004240	144052778	GGGGCTGATCCCTGGGAAAGGCCTGGCTTCCTCTTCCTTCCTGTCCCTGCCCCACCTCCG	intronic antisense	NM_001001802	OR2A42	olfactory receptor 2A1/2A42	+	144015217	144016150	7.95296	9.86251
ASHGA5P053355	0.0272299	0.0799892	3.75691	down	noncoding	ENST00000486094	RP4-798C17.6	GENCODE	819	chr7	-	144004240	144052778	GGGGCTGATCCCTGGGAAAGGCCTGGCTTCCTCTTCCTTCCTGTCCCTGCCCCACCTCCG	intronic antisense	NM_001005287	OR2A1	olfactory receptor 2A1/2A42	+	144015217	144016150	7.95296	9.86251
ASHGA5P053355	0.0272299	0.0799892	3.75691	down	noncoding	ENST00000486094	RP4-798C17.6	GENCODE	819	chr7	-	144004240	144052778	GGGGCTGATCCCTGGGAAAGGCCTGGCTTCCTCTTCCTTCCTGTCCCTGCCCCACCTCCG	natural antisense	NM_005435	ARHGEF5	rho guanine nucleotide exchange factor 5	+	144052488	144077725	7.95296	9.86251
ASHGA5P054425	0.00487118	0.0391245	3.75248	down	noncoding	ENST00000419779	RP11-508N22.9	GENCODE	428	chr10	+	38453575	38466958	CACAATATTCCTGAGAAAATCTCAAATAGATGGTGAGACAACATTGTTTTTTCTGCCAAG	intergenic							2.76502	4.67286
ASHGA5P035996	0.0219603	0.070556	3.7513	down	noncoding	TCONS_00027541	XLOC_013072	LincRNAs identified by Cabili et al	495	chr19	+	40018979	40019553	AACATTTAAAACTTAAAACTATTCATGAGTGTGGGGGGAAGGTAGGGTGCAACCTGAGGC	intergenic							5.11781	7.0252
ASHGA5P034000	0.00395383	0.0377672	3.75018	down	noncoding	ENST00000455464	RP4-669L17.4	GENCODE	573	chr1	+	334139	342806	TAAGCTGAATGTACGTATAAAATATGATTTTCTAACCACTTGCTCGCCAACAAGGAAAAC	intergenic							4.13374	6.04069
ASHGA5P053621	0.000354192	0.0166633	3.73422	down	noncoding	TCONS_00012029	XLOC_005561	LincRNAs identified by Cabili et al	488	chr6	+	170462440	170466134	ATTTCTCAGACGTCCCAGAGCCCTGACTCTGCTGCCAGCTTGCTTTACAGTGAGGCCAAG	intergenic							5.11865	7.01945
ASHGA5P029405	0.000398641	0.0175839	3.73171	down	noncoding	ENST00000551144	RP11-244H18.3	GENCODE	1836	chr14	+	20105462	20109540	CCTGTTCCACATCTATGCATTCCCCATCTATCTAATGTATATTCAGACACAAATGTATAT	intergenic							4.02286	5.92269
ASHGA5P026288	0.00779218	0.0433457	3.72949	down	noncoding	ENST00000478367	WT1-AS	GENCODE	561	chr11	+	32459168	32459872	GAGGAGGTTATCTGAAGGGAGGCTGGCTTGAATGTGAGTCGTTGTGTTTGTGAAACCCAG	intergenic							4.10801	6.00699
ASHGA5P028990	0.000740464	0.02304	3.72711	down	noncoding	ENST00000482381	RP4-565E6.1	GENCODE	552	chr1	-	146126403	146136197	CTTAAAATGTCACCTGATGTTAGTTGTCCCTCACTGATTCAAGTAATTTCCTTTATTGAG	intron sense-overlapping	ENST00000436832	WI2-3658N16.1	Neuroblastoma breakpoint family member 12 [Source:UniProtKB/TrEMBL;Acc:E7EP91]	-	146032647	146215986	3.35768	5.25574
ASHGA5P026640	0.00123395	0.0269963	3.72552	down	noncoding	TCONS_00012625	XLOC_005531	LincRNAs identified by Cabili et al	534	chr6	+	164194208	164195409	CAAAAATAAGGCTCCAGTGCCTCCACTCAGGAAAGCTCAAGTAGGTTTTCTTGAGAATTT	intergenic							3.62158	5.51903
ASHGA5P036045	0.00346221	0.0361534	3.72259	down	noncoding	ENST00000416057	AC108868.4	GENCODE	618	chr2	+	107103884	107120781	TGCTGGTGGCTGGCGTCCTGGTTCTGCTGGTTTCCCTGGGAGTGGCCATGCACCTGTGCT	intergenic							6.08629	7.9826
ASHGA5P042030	0.00224391	0.0319402	3.72134	down	noncoding	ENST00000442449	RP1-69D17.3	GENCODE	391	chr6	-	129800759	129802555	CCTTCATTTCCCTAATTCTATTGGAGTGGTTTAAGATAATTTTGATTAGAAGCAGCAGAC	natural antisense	NM_000426	LAMA2	laminin subunit alpha-2 isoform a precursor	+	129204285	129837710	5.44816	7.34399
ASHGA5P042030	0.00224391	0.0319402	3.72134	down	noncoding	ENST00000442449	RP1-69D17.3	GENCODE	391	chr6	-	129800759	129802555	CCTTCATTTCCCTAATTCTATTGGAGTGGTTTAAGATAATTTTGATTAGAAGCAGCAGAC	natural antisense	NM_001079823	LAMA2	laminin subunit alpha-2 isoform b precursor	+	129204285	129837710	5.44816	7.34399
ASHGA5P046704	2.76051e-05	0.00861233	3.71726	down	noncoding	ENST00000423819	RP11-297A16.2	GENCODE	315	chr10	-	35386954	35389990	AACCTGTTCATCTGGTACCACTATCACCCACAGAATATGATATGAGTTCTGAGCTTTTCC	intergenic							2.90886	4.8031
ASHGA5P052965	0.0125281	0.0517906	3.7004	down	noncoding	ENST00000413182	AC073343.13	GENCODE	548	chr7	+	6703604	6705152	CAAACCCCAGGTGAGTTCCTTTTTTAGATTTTTTCATTTTCCAGGGGATTTGCTGGCTTT	intergenic							4.38322	6.2709
ASHGA5P036955	0.0047168	0.0390427	3.69723	down	noncoding	ENST00000449841	RP5-1069C8.1	GENCODE	484	chr20	+	12916686	12917842	AATCTGCTCACCTGAAAGGCTCACTCCTGTTGTAATAAATGACACATAAGGTCACAATTC	intergenic							3.28552	5.17196
ASHGA5P050939	0.00326468	0.0360585	3.69562	down	noncoding	ENST00000428254	RP4-694B14.5	GENCODE	817	chr20	+	25604792	25654544	TGGCTGGCGTTGGTCCGAAGCGTGGTGTTCTTCCCTGGTGTCTTTCTGCTTATCTCTTTC	natural antisense	ENST00000304788	NANP	N-acetylneuraminic acid phosphatase [Source:HGNC Symbol;Acc:16140]	-	25593570	25604811	5.80226	7.68808
ASHGA5P017453	0.0134975	0.0536332	3.69261	down	noncoding	ENST00000441809	CTA-520D8.2	GENCODE	1007	chr1	-	13983805	13987033	CTAAGATTTGGTTTTCTTTTTGTTTTCTCATTAAAATATCTTAAGCTTTATGGAGTAAAA	intergenic							3.87735	5.76199
ASHGA5P044071	0.020084	0.0671305	3.68951	down	noncoding	ENST00000520842	RP11-134O21.1	GENCODE	577	chr8	-	2554055	2585957	GAGCTGGCTGGCCCATCCTCTCTTCTTTCCCTTGTTTTTCTATTTTATCTTTCAAAGCAG	intergenic							7.40505	9.28848
ASHGA5P028720	5.78042e-05	0.0102502	3.68847	down	noncoding	uc001uol.3	BC048997	UCSC_knowngene	692	chr13	+	23394480	23395172	AACAAATAAGCCCGTCTTATCCTGCTCTGTTAACATGATAGAGTGGGTTTTTTACCACAA	intergenic							3.18563	5.06866
ASHGA5P039484	0.0259035	0.0771749	3.68479	down	noncoding	TCONS_00022649	XLOC_010951	LincRNAs identified by Cabili et al	204	chr14	+	105543607	105543911	CACCTGAGAGATCTCATCTTTACACACATGCACACTCAACACACAGGTGCACACACACAG	intergenic							4.47318	6.35476
ASHGA5P029384	0.00521954	0.0398465	3.67756	down	noncoding	ENST00000479229	RP11-731F5.1	GENCODE	497	chr14	-	106067993	106069282	AAGCTGGTTGAGCTGGCTGGACTGAAATAAGAGTTTGCTGCCTGCAAGGGGAGGTCCTGG	intergenic							5.46187	7.34061
ASHGA5P029511	0.00613354	0.0408325	3.67706	down	noncoding	ENST00000557188	DPPA3P2	GENCODE	1219	chr14	+	36840369	36841588	CAAGAAATTGAAGCAAAGTTACTTGTGGATAAAGAAAGCATTAGGTAGTTTGGCTATAGC	intergenic							2.85642	4.73498
ASHGA5P057347	0.0203238	0.0675343	3.67663	down	noncoding	TCONS_00016233	XLOC_007615	LincRNAs identified by Cabili et al	835	chr9	+	139543084	139548533	GGCTGGCTCTGAAAATTATGAACTCTCTTTTCCTTAAAATAAAGGCTCTAAAATTGTGTG	intergenic							6.5172	8.39559
ASHGA5P041184	0.0211368	0.0692372	3.67124	down	noncoding	uc003kex.3	LOC728723	UCSC_knowngene	1298	chr5	+	76383261	76401215	GTGTTTTTTTGGTTTTTGGTTTTGGTTTGAGTGAATCTTTTTGCAAAACATTTTAGACAT	bidirectional	NM_032367	ZBED3	zinc finger BED domain-containing protein 3	-	76372531	76383030	4.97644	6.85271
ASHGA5P035407	0.00488641	0.0391245	3.66094	down	noncoding	ENST00000420211	RP11-422P22.1	GENCODE	491	chr1	+	18712322	18715008	AAAGCCCTTCCTTAAATCCTTTAAAGCCTAGGCTTAGGGGATTGGGCTCCTGCTTTAAGA	intergenic							4.50459	6.3768
ASHGA5P054956	0.0443367	0.109079	3.65901	down	noncoding	TCONS_00008387	XLOC_003839	LincRNAs identified by Cabili et al	363	chr4	+	190198000	190198810	GTATGTGACAGGCTCTCATAATCACCATCATCATGTGATCTTGTGCATGTTACAGGGAAG	intergenic							4.16392	6.03538
ASHGA5P049294	0.00933689	0.0457225	3.65682	down	noncoding	TCONS_00020965	XLOC_010235	LincRNAs identified by Cabili et al	302	chr12	-	124742378	124750677	TTAAGTGGCAGGCATTGTAGATACAGTTCAGTCATTCTTTTTTATGGCATGTTTAGTTGG	intronic antisense	NM_001204299	ZNF664-FAM101A	protein FAM101A	+	124457761	124800570	3.85948	5.73008
ASHGA5P043566	0.0102323	0.0473781	3.65636	down	noncoding	ENST00000517641	HOXA-AS2	GENCODE	583	chr7	+	27162061	27163437	TGTCTGTCTGCCTTCACGCAATTCTGTAGATAGCGCTAAGAGGGGATATCAAATAGCTGA	natural antisense	NM_153631	HOXA3	homeobox protein Hox-A3 isoform a	-	27145808	27166639	4.7813	6.6517
ASHGA5P006756	0.00204591	0.031356	3.65038	down	noncoding	NR_027245	LINC00305	RefSeq	885	chr18	-	61747242	61816260	CTGCCCTTCACAAGGATGGAAATTATCTGGTTCCACCCCTGGATATGATCAACCTTCATA	intergenic							9.51127	11.3793
ASHGA5P057511	0.0402309	0.102676	3.63485	down	noncoding	TCONS_00018430	XLOC_008727	LincRNAs identified by Cabili et al	349	chr10	-	9905623	9920011	ATGTTAGCAGGTGTGTGGGTGAGTGCTCCCTGTGATGGAACGGTGTCCTGTTCAGGACTG	intergenic							4.25565	6.11754
ASHGA5P045237	0.000520807	0.0197628	3.63084	down	noncoding	ENST00000441245	RP5-857K21.4	GENCODE	629	chr1	-	637315	655530	CCGATGCCTCATTTTCCTCATCAGTTGAAAGGAATGAATGAAAGATTTGTGTTTTTCATA	intergenic							3.28433	5.14463
ASHGA5P032242	0.0113735	0.0492835	3.63006	down	noncoding	uc002gua.4	CCDC144B	UCSC_knowngene	8695	chr17	-	18441114	18528930	TGCGGTGGCTGCTTGGCTTGGCGGTGGTCGCTTGGCTTGGCGTGGCAGTGATCGCTTGGC	intergenic							6.52245	8.38245
ASHGA5P058655	0.0260502	0.0775619	3.62351	down	noncoding	uc022bqs.1	JA040725	UCSC_knowngene	781	chrM	-	7586	15888	AATTGTCTGGGTCGCCTGGTTCTAGGAATAATGGGGGAAGTATGTAGGAGTTGAAGATTA	intergenic							7.93306	9.79044
ASHGA5P027687	0.00691254	0.0420215	3.62321	down	noncoding	BF739255		LincRNAs identified by Khalil et al	163	chrX	-	128835377	128835612	GTCCACTCCGTCACTCACCTGCTTGCCATCCTCATTGCGGGCTTTAACTCATCAGCCCTG	intergenic							7.2051	9.06237
ASHGA5P029177	0.00965348	0.0463618	3.61715	down	noncoding	ENST00000555156	RP11-355I22.4	GENCODE	295	chr14	-	62600866	62606691	CCCACCTCCCCTACTTAACAAAGGCACCTATATTTCACCAGAAATAAAATTTTATTAGTA	intergenic							8.70155	10.5564
ASHGA5P036800	0.0082411	0.0439509	3.61512	down	noncoding	ENST00000452971	RP11-329N22.1	GENCODE	790	chr1	+	38940867	38942156	CTCTCTTCTTCCAACCAGCCAATATTTTTTGTCTTTCTAGAAAACCTGTCTTGTTCAAAG	intergenic							3.25388	5.10792
ASHGA5P041071	0.0273293	0.0801669	3.61341	down	noncoding	ENST00000504469	RP11-159F24.3	GENCODE	440	chr5	+	43484060	43488542	CTGTGAAAGAACTGCTCTCTCCTTCCTTGAATTCCTATAGCATATTAATTAATCACATAC	intronic antisense	NM_198566	C5orf34	uncharacterized protein C5orf34	-	43486802	43515273	6.02794	7.88131
ASHGA5P015306	0.023696	0.0734924	3.61212	down	noncoding	ENST00000419100	AC090696.2	GENCODE	418	chr15	+	28020766	28021944	ATCAAAAGCCTGTTCTCTCTCAGTTCTAAAGAGGCAGCCCAGGATGTGTTGAGTTACATC	intronic antisense	NM_000275	OCA2	P protein	-	28000022	28344458	3.35857	5.21142
ASHGA5P057633	0.0342339	0.0923014	3.60698	down	noncoding	TCONS_00019973	XLOC_009252	LincRNAs identified by Cabili et al	307	chr11	+	94371264	94371891	TTCCTAAGAGCCTTTTCCTTTCCCTTGAAGATTCCACAAATATGTCAGCGCTGGAAATGA	intergenic							5.54054	7.39133
ASHGA5P043809	3.25583e-05	0.00861233	3.60615	down	noncoding	ENST00000376482	AC073842.19	GENCODE	342	chr7	+	99728586	99738062	TTTGGGCTCACACCATTGATACTGCTGATCCTGATGACCAATGCCAATTTGTGTTCTGCA	intergenic							3.90951	5.75997
ASHGA5P000360	0.0385908	0.0999005	3.60033	down	noncoding	chr2:237208375-237219525+	chr2:237208375-237219525	LincRNAs identified by Khalil et al	11150	chr2	+	237543636	237554786	ATTAAATACATTCCTTCCGTCTGCCTTCCCATCTATCATGGTGGAACATTGCAGGGATGG	intergenic							5.58719	7.43532
ASHGA5P044909	0.00398044	0.0377672	3.60021	down	noncoding	ENST00000518266	CTA-392E5.1	GENCODE	371	chr8	+	86901751	86963312	GTCCAGAACATTGCGCCTAAATGAATCTAACAAGAGGTAAGTTGAACATAATATTGGTAT	intergenic							3.06557	4.91365
ASHGA5P054958	0.0295859	0.084148	3.58845	down	noncoding	TCONS_00008983	XLOC_003839	LincRNAs identified by Cabili et al	307	chr4	+	190198382	190198838	ATGTGACAGACTCTCATAGTCACCATCATCAAGGGAATCTTGTGCATGTTACAGGGAAGC	intergenic							3.88091	5.72427
ASHGA5P048559	0.0168903	0.0605576	3.5803	down	noncoding	TCONS_00005056	XLOC_001935	LincRNAs identified by Cabili et al	237	chr2	-	747657	748017	TGATGGTGAGGTCGGGGCTGTAGCATCGTCATTGGTGGTGGTGATGGTGAGGTCGGGGCT	intergenic							7.03471	8.87479
ASHGA5P028557	0.00636373	0.0410595	3.56411	down	noncoding	ENST00000415979	AL583842.2	GENCODE	363	chr1	-	142569265	142588234	GAGAGGATTTCAGATGATAGAAGTCGGGCAACTATCCCAGGTTTAAGAAATAAGCAAATG	intergenic							3.43979	5.27333
ASHGA5P026078	0.0203306	0.0675343	3.56365	down	noncoding	BG925420		LincRNAs identified by Khalil et al	694	chr5	-	68023867	68024476	AGTGTCTCTCATCTGTGGTCTCTAATTCATTGAGGCCCAATGAATCTGCCTAAAGACAGG	intergenic							3.45968	5.29303
ASHGA5P043558	0.0478684	0.11444	3.56053	down	noncoding	ENST00000448056	AC004540.5	GENCODE	567	chr7	+	26479878	26533734	TTGTTCTTGTCTCTGTCTCCAGAGTGAAGTTTGTCTCCCTGACAGTTAATCCTGAGACAG	intergenic							4.68886	6.52095
ASHGA5P031698	0.024787	0.0756029	3.55398	down	noncoding	ENST00000569756	AC002519.6	GENCODE	551	chr16	+	31814283	31817242	TTTCACTCCACCCAGACCACTGCATCCATTTTTACCTTAAAATATTTGAAATGGACCACT	intergenic							6.68957	8.519
ASHGA5P036571	0.0276854	0.0808095	3.53854	down	noncoding	ENST00000448543	AC113618.1	GENCODE	553	chr2	+	239628964	239649421	TAAATAGAATATGTCTGCTCCTCTCACCTTCCTCTCTGCTCAGTAGTATGTCTCTTACCA	intergenic							7.04333	8.86648
ASHGA5P030794	0.0283917	0.0820688	3.5382	down	noncoding	uc021sxj.1	AL109706	UCSC_knowngene	2503	chr15	+	99571772	99574275	CTTGTTAAGTGGAGCTGGGGGATGATTAATTTTGTTTGTTTGTTTTTGTTGTTCCCTGGT	intergenic							4.78894	6.61195
ASHGA5P033840	0.00146759	0.0283109	3.53637	down	noncoding	uc002lat.3	LOC284260	UCSC_knowngene	935	chr18	+	39766634	40113317	CATGAGGAAGTTCTTCAGGCTGCGTCTCCTTTTTGTGTTTTTATTTGATCTTTAATAAAG	intergenic							3.26219	5.08445
ASHGA5P027218	0.00777013	0.0433457	3.53013	down	noncoding	BF803219		LincRNAs identified by Khalil et al	175	chr8	+	90226145	90226296	AAGCCCTTCATGATCCTAGCTGTGATTTTCTTGCTCCCCCTTGCTATATTTATTCTGGGC	intergenic							9.56445	11.3842
ASHGA5P038550	0.0161121	0.0591676	3.52952	down	noncoding	ENST00000483289	RP11-379K17.4	GENCODE	5523	chr3	-	169661771	169684014	AATTATAAATTATAGTGTGTCTCTCCTCTCTTACCAAGGACTAAGGGCTAAAGTATCGAC	bidirectional	NM_003262	SEC62	translocation protein SEC62	+	169684579	169716161	5.17973	6.9992
ASHGA5P031855	0.0124089	0.051472	3.52641	down	noncoding	TCONS_00006565	XLOC_003194	LincRNAs identified by Cabili et al	338	chr3	-	102379500	102382168	ATATGGCCAACTTGCCACCTCTCTCTTCTCCTTGTTCCTGGAACATGTTGCTAATTGCTA	intergenic							6.04974	7.86794
ASHGA5P028694	0.0286748	0.0824735	3.52597	down	noncoding	ENST00000448748	LINC00349	GENCODE	841	chr13	+	19114636	19124837	CTCTGTCCTCTTTTCTCATACAATTTATCTTTTCCACATATGGATGGAATAAAACTGCAG	intergenic							4.37614	6.19416
ASHGA5P050165	0.00427705	0.0383369	3.5244	down	noncoding	TCONS_00019067	XLOC_009007	LincRNAs identified by Cabili et al	358	chr10	-	134824705	134825301	ACACACTAACACACATCACACGTGCTAAAACACGTCACACAAGCACACATCACACACACT	intergenic							5.44242	7.2598
ASHGA5P031101	0.000337368	0.016478	3.51835	down	noncoding	ENST00000564629	RP11-452L6.5	GENCODE	3026	chr16	-	31468031	31471057	TGTGTGAGCCCTTCAAAAGTCCTCTCAGCACGTGAGAACTATCATTATGGATGATGCTAG	natural antisense	NM_001105247	ARMC5	armadillo repeat-containing protein 5 isoform a precursor	+	31470316	31478488	4.59457	6.40947
ASHGA5P031101	0.000337368	0.016478	3.51835	down	noncoding	ENST00000564629	RP11-452L6.5	GENCODE	3026	chr16	-	31468031	31471057	TGTGTGAGCCCTTCAAAAGTCCTCTCAGCACGTGAGAACTATCATTATGGATGATGCTAG	natural antisense	NM_024742	ARMC5	armadillo repeat-containing protein 5 isoform b precursor	+	31470316	31478488	4.59457	6.40947
ASHGA5P032181	0.00776043	0.0433457	3.51813	down	noncoding	ENST00000582915	RP11-597M12.1	GENCODE	335	chr17	-	12893465	12893927	AAAGGAACAAACAAAACCTGCACCACCAGCATCACCACACGGACTGGAGATCACAATTTT	natural antisense	NM_014859	ARHGAP44	rho GTPase-activating protein 44	+	12692828	12894960	6.48371	8.29852
ASHGA5P045666	7.03287e-05	0.0112092	3.51557	down	noncoding	ENST00000522960	RP11-56F10.3	GENCODE	564	chr9	+	27102627	27104726	ATTTCTGTGTCTCTTCCTACGGTGAATAATATAGTCCTTGCCGTTTCAATGTTAACAAAA	intergenic							3.32761	5.14137
ASHGA5P035296	0.0466722	0.112484	3.51534	down	noncoding	NR_036537	LOC100131320	RefSeq	2474	chr2	-	130724164	130738045	TCTCAGTCTTTCTCTCTTTTCTCTGGTGATTAAAAAGTTGGTTTTTGGTAAGGAAAAGGA	natural antisense	NM_032144	RAB6C	ras-related protein Rab-6C	+	130737234	130740311	5.7393	7.55297
ASHGA5P017524	0.0278032	0.0810025	3.51207	down	noncoding	ENST00000442712	RP11-439E19.7	GENCODE	522	chr1	+	246853348	246855123	ATATACACACGTCGATTTAGGTCTCTGTCTCTGGCAACTGAAAAGAGACCCAACAAAACA	intergenic							3.67455	5.48687
ASHGA5P057970	0.000212363	0.0142595	3.51031	down	noncoding	TCONS_00024490	XLOC_011810	LincRNAs identified by Cabili et al	462	chr16	+	86052352	86061287	TAAGAGGAAGCAGCAATGCTCTGTGTAAAGACACTCCACACACACACTCAGGAAATGGAA	intergenic							5.89531	7.70691
ASHGA5P037821	0.00996157	0.0468412	3.50581	down	noncoding	uc002zul.4	AK128837	UCSC_knowngene	3266	chr22	+	21538002	21546445	AGCTAATGAGGTTGCTGTATATGACATCGCTAATGAGGACATTGTATATGACATCGCTAA	intergenic							3.45842	5.26817
ASHGA5P035244	0.0375258	0.0981507	3.50343	down	noncoding	ENST00000446590	AC016683.5	GENCODE	559	chr2	-	113929111	113932914	TCTCTCTCCATCAAGCTGGGTAAGTCAGAAACCTGAAGTCACCAAGACCTAAATGCAAAC	intronic antisense	NM_012455	PSD4	PH and SEC7 domain-containing protein 4	+	113931559	113960677	3.82746	5.63623
ASHGA5P031405	0.00195282	0.0309043	3.50053	down	noncoding	ENST00000562782	CTD-2555A7.3	GENCODE	2105	chr16	-	89179582	89181687	ATCCTCTCCTTCACTGACCTCGTTCTTGCCCTTGGTTCCTTAGATTTGGTAAAACGTTGT	natural antisense	NM_001127214	ACSF3	acyl-CoA synthetase family member 3, mitochondrial precursor	+	89160216	89222171	8.50877	10.3163
ASHGA5P031405	0.00195282	0.0309043	3.50053	down	noncoding	ENST00000562782	CTD-2555A7.3	GENCODE	2105	chr16	-	89179582	89181687	ATCCTCTCCTTCACTGACCTCGTTCTTGCCCTTGGTTCCTTAGATTTGGTAAAACGTTGT	natural antisense	NM_001243279	ACSF3	acyl-CoA synthetase family member 3, mitochondrial precursor	+	89160216	89222171	8.50877	10.3163
ASHGA5P031405	0.00195282	0.0309043	3.50053	down	noncoding	ENST00000562782	CTD-2555A7.3	GENCODE	2105	chr16	-	89179582	89181687	ATCCTCTCCTTCACTGACCTCGTTCTTGCCCTTGGTTCCTTAGATTTGGTAAAACGTTGT	natural antisense	NM_174917	ACSF3	acyl-CoA synthetase family member 3, mitochondrial precursor	+	89160216	89222171	8.50877	10.3163
ASHGA5P044363	0.0438303	0.108296	3.4874	down	noncoding	ENST00000456240	RP11-323I1.1	GENCODE	347	chr1	+	213904758	213967930	CCTTACTCCTCCTTTAATGAAGGGAAAAAATAAATTTTCCTGTATCAAAACCTAGACTGG	intergenic							3.34859	5.15074
ASHGA5P045974	0.00158597	0.0287561	3.48015	down	noncoding	ENST00000425153	RP11-205K6.2	GENCODE	339	chr9	+	129289896	129292622	AAGGGATTCCACCCCCCATTCCAAGTCCCCTCCAAAAATATATATTGAAAGAAAACAAAA	intergenic							10.5176	12.3167
ASHGA5P023245	0.000511125	0.0196379	3.47733	down	noncoding	ENST00000575647	CTD-2561B21.11	GENCODE	351	chr17	-	78991768	78992292	TGCCCTTTCGCTTCCAGTCCTGCCACAGTCTTGAAGAAGAGATCAGCTTTCGCGTCTTCA	intergenic							7.45427	9.25225
ASHGA5P043233	0.000691219	0.0225597	3.47435	down	noncoding	ENST00000457321	RP5-1011O1.3	GENCODE	684	chr1	+	192498708	192507232	GAATCAGATTTGGCTCTTCACTTCTGCCTTCAGTGCTGTCCAGACTCAGACATTATATCA	intergenic							5.82341	7.62015
ASHGA5P033232	0.00142372	0.0281117	3.473	down	noncoding	ENST00000505978	RP11-1018N14.3	GENCODE	650	chr17	+	49410039	49411451	GGGTGCTGTGCTAAATGTGCTTCAAACAACATTTCATTGAACTCCCACGACTCAATGAAT	intergenic							4.30511	6.10129
ASHGA5P036467	0.0121185	0.0508206	3.47144	down	noncoding	ENST00000420563	AC053503.4	GENCODE	1598	chr2	+	220253217	220268355	AGACGCACACACCACACAAATATTATTGTTCCTCAACAATTTACACATTCTGAAATTGGA	intronic antisense	ENST00000434339	DNPEP	aspartyl aminopeptidase [Source:HGNC Symbol;Acc:2981]	-	220250380	220264729	6.07076	7.86629
ASHGA5P036467	0.0121185	0.0508206	3.47144	down	noncoding	ENST00000420563	AC053503.4	GENCODE	1598	chr2	+	220253217	220268355	AGACGCACACACCACACAAATATTATTGTTCCTCAACAATTTACACATTCTGAAATTGGA	intronic antisense	ENST00000457935	DNPEP	aspartyl aminopeptidase [Source:HGNC Symbol;Acc:2981]	-	220246719	220264744	6.07076	7.86629
ASHGA5P036467	0.0121185	0.0508206	3.47144	down	noncoding	ENST00000420563	AC053503.4	GENCODE	1598	chr2	+	220253217	220268355	AGACGCACACACCACACAAATATTATTGTTCCTCAACAATTTACACATTCTGAAATTGGA	intronic antisense	ENST00000523282	DNPEP	aspartyl aminopeptidase [Source:HGNC Symbol;Acc:2981]	-	220238915	220264729	6.07076	7.86629
ASHGA5P036467	0.0121185	0.0508206	3.47144	down	noncoding	ENST00000420563	AC053503.4	GENCODE	1598	chr2	+	220253217	220268355	AGACGCACACACCACACAAATATTATTGTTCCTCAACAATTTACACATTCTGAAATTGGA	natural antisense	ENST00000373972	DNPEP	aspartyl aminopeptidase [Source:HGNC Symbol;Acc:2981]	-	220238915	220253598	6.07076	7.86629
ASHGA5P036467	0.0121185	0.0508206	3.47144	down	noncoding	ENST00000420563	AC053503.4	GENCODE	1598	chr2	+	220253217	220268355	AGACGCACACACCACACAAATATTATTGTTCCTCAACAATTTACACATTCTGAAATTGGA	natural antisense	ENST00000519905	DNPEP	aspartyl aminopeptidase [Source:HGNC Symbol;Acc:2981]	-	220251408	220264703	6.07076	7.86629
ASHGA5P031325	0.00569602	0.0402776	3.47067	down	noncoding	ENST00000565050	RP11-525K10.3	GENCODE	1476	chr16	-	80189145	80574844	CCCCATATGTTTCCTCCTTTTTTTGCTTAAGGTAGTTTGAGGTAGATTTCCATTGTCTGC	natural antisense	ENST00000562982	DYNLRB2	dynein, light chain, roadblock-type 2 [Source:HGNC Symbol;Acc:15467]	+	80574630	80584538	3.55925	5.35446
ASHGA5P050170	0.00812139	0.0437937	3.46572	down	noncoding	TCONS_00018656	XLOC_009007	LincRNAs identified by Cabili et al	207	chr10	-	134824750	134825301	CACACTAACACACATCACACGTGCTAAAACACATCACACAAGCACACATCACACACACTA	intergenic							5.76588	7.55904
ASHGA5P045567	0.00638997	0.0410595	3.46333	down	noncoding	TCONS_00001785	XLOC_001174	LincRNAs identified by Cabili et al	626	chr1	-	207097099	207097924	TAGAGTGTGCACACACACACTCATAGCCACACACCACGCAGTGACACACACTCATAACTA	intergenic							5.71647	7.50863
ASHGA5P035053	0.0111075	0.0490518	3.45385	down	noncoding	NR_033980	FLJ16341	RefSeq	1705	chr2	-	61074894	61108449	GGATTTCCCCCGGGAGCTCTTTTTGCGAAGGATGTTTTGTTTTTCCTTTGTGAATAGGGA	bidirectional	NM_002908	REL	proto-oncogene c-Rel	+	61108751	61150178	4.08471	5.87292
ASHGA5P045199	0.00236779	0.032646	3.4441	down	noncoding	ENST00000440200	RP5-857K21.4	GENCODE	413	chr1	-	536815	655580	GTGCTGTGTGAACCTGTGACTTCAGGGCCTGTTGACGTGGTCGTGCTTGCATACTCTCTG	intron sense-overlapping	NM_001005221	OR4F29	olfactory receptor 4F3/4F16/4F29	-	621095	622034	2.78788	4.572
ASHGA5P045199	0.00236779	0.032646	3.4441	down	noncoding	ENST00000440200	RP5-857K21.4	GENCODE	413	chr1	-	536815	655580	GTGCTGTGTGAACCTGTGACTTCAGGGCCTGTTGACGTGGTCGTGCTTGCATACTCTCTG	intron sense-overlapping	NM_001005224	OR4F3	olfactory receptor 4F3/4F16/4F29	-	621095	622034	2.78788	4.572
ASHGA5P045199	0.00236779	0.032646	3.4441	down	noncoding	ENST00000440200	RP5-857K21.4	GENCODE	413	chr1	-	536815	655580	GTGCTGTGTGAACCTGTGACTTCAGGGCCTGTTGACGTGGTCGTGCTTGCATACTCTCTG	intron sense-overlapping	NM_001005277	OR4F16	olfactory receptor 4F3/4F16/4F29	-	621095	622034	2.78788	4.572
ASHGA5P051385	0.0050121	0.0392664	3.43971	down	noncoding	ENST00000430316	RP4-655J12.4	GENCODE	461	chr1	-	116995656	117020849	CCCCTCCTAGGTTCTCACATCGCTTTCCTGTTTCCCTCTCCTGCAATATGGATTTGACAT	intergenic							6.80227	8.58456
ASHGA5P014588	0.00270311	0.03424	3.43922	down	noncoding	ENST00000411606	GS1-124K5.2	pseudogene	981	chr7	-	65892935	65918621	ATGAAAGATCTTGCCATTCAAAAGAGGATCAGAGCCCTTCACTGGGTTACACCTCAGATG								6.18059	7.96267
ASHGA5P000171	0.0124785	0.0516678	3.43306	down	noncoding	chr1:47977525-47990050-	chr1:47977525-47990050	LincRNAs identified by Khalil et al	12525	chr1	-	48204938	48217463	ACCCACCCAGCCACTTGATTTTTCCCACCTTTAAGTTCCTATGGTACTTACTTCTGGTGA	intergenic							6.31051	8.09
ASHGA5P057386	0.0444894	0.109367	3.42869	down	noncoding	TCONS_00016578	XLOC_007352	LincRNAs identified by Cabili et al	2747	chr9	+	38650195	38662716	AAACATAGAAGTGTGAGCCACCGCACCTGGCCAATAGTGGGTATTAAAAGATAAACAAGT	intergenic							7.26538	9.04304
ASHGA5P043787	0.0100433	0.0470337	3.4274	down	noncoding	ENST00000415536	AC003092.1	GENCODE	639	chr7	+	93652144	93694035	GATAAGGACTTTCAGGTCAACAGCTGTAACTGCTAAATGAAGTTAATACTCTGGAAAAAA	intergenic							3.29124	5.06836
ASHGA5P019261	0.00211623	0.0314014	3.42564	down	noncoding	NR_028106	DCAF8	RefSeq	1495	chr1	-	160209011	160232277	CCCTCCCTTGACCTACCCGGAGCTCAGCCTGGCCTTACTTCAGTGATAAAAGGAGGAAAG	exon sense-overlapping	NM_015726	DCAF8	DDB1- and CUL4-associated factor 8	-	160185504	160232350	9.18371	10.9601
ASHGA5P031123	0.000933149	0.0253095	3.41803	down	noncoding	ENST00000565847	RP11-1437A8.4	GENCODE	426	chr16	-	33215174	33216055	CATGGCTGTTAGGAAGCTTAACTTCTGTGTACTAGAACCTATCAAAATTAAATTTCTCCA	intronic antisense	ENST00000398667	TP53TG3C	TP53 target 3C [Source:HGNC Symbol;Acc:42962]	+	33204155	33264727	2.88834	4.66151
ASHGA5P053394	0.0013333	0.0275471	3.41301	down	noncoding	ENST00000422183	GAS5	GENCODE	745	chr1	-	173833039	173836181	GTTGGGACTATTATAATTGCAGAATACATGATGATCTCAATCCAACTTGAACTCTCTCAC	intergenic							6.91454	8.68558
ASHGA5P043069	0.0239909	0.0739242	3.41114	down	noncoding	ENST00000412800	GS1-278J22.2	GENCODE	437	chr7	-	53626906	53635942	CTCCTCCCCCAAGTGTGTAATCATAGCCTTTAGTTTTTACAAAACTTTCATTACTTTAAG	intergenic							8.57603	10.3463
ASHGA5P036141	0.001238	0.0269963	3.40682	down	noncoding	ENST00000424716	AC068137.1	pseudogene	533	chr2	+	130893550	130895332	TCTTCAACCATTCCCTGTACCGCATATTCATGCCAACCATGATTGCCATCCACAGCCCAC								3.20985	4.97828
ASHGA5P048056	0.0196901	0.0661916	3.40553	down	noncoding	ENST00000526225	CTD-2210P24.3	GENCODE	166	chr11	-	45772656	45773124	CTCTTCCTCCACCTCTGCCACAGGGCTCCAGCTTCCCTCTGGGGGCACCACTGTTCTTAG	intergenic							7.72176	9.48964
ASHGA5P048345	0.0244074	0.0746469	3.40539	down	noncoding	TCONS_00013900	XLOC_006532	LincRNAs identified by Cabili et al	338	chr7	-	98283481	98286896	AAGTCAAGAAATCCTCCTTCCTGCTTGTACCAGTTGGCAGTGGGTTTTCTGGCATTTGTA	intergenic							4.30091	6.06872
ASHGA5P035583	0.0191854	0.0652316	3.40426	down	noncoding	TCONS_00004331	XLOC_002204	LincRNAs identified by Cabili et al	534	chr2	-	92176818	92179491	ATACTTAGATTGTAACCCATAATGTAGATATTATTTTTCCTTCAACTCTTAAGAATATTC	intergenic							3.07903	4.84637
ASHGA5P057545	0.0262185	0.0778116	3.39722	down	noncoding	TCONS_00018653	XLOC_009007	LincRNAs identified by Cabili et al	376	chr10	-	134824439	134825072	TCACACAAGCACACATCACACGTGCTAAAACACATCACACAAGCACACATCACACACACT	intergenic							5.60745	7.37181
ASHGA5P015773	0.00574913	0.0402832	3.3955	down	noncoding	ENST00000423385	RP11-423O2.5	GENCODE	1742	chr1	-	142803223	142816004	GCCAAACGAGGGTTCCACAGAAGTCTCCAATCTTCAAATCTTCAGTGTATGAAAGCACAG	intergenic							3.25107	5.01469
ASHGA5P029841	0.0183244	0.0635555	3.39199	down	noncoding	uc001yrr.3	BC033241	UCSC_knowngene	2014	chr14	+	105998191	106000654	GACCCTTCATCTTCCTTTCAGAACACACTCACATTTTCTATAGGAAAACAGCCTCATAAT	intergenic							7.45787	9.22
ASHGA5P035794	0.0135211	0.0536479	3.37692	down	noncoding	NR_027098	LINC00486	RefSeq	1991	chr2	+	33050509	33154206	GTCATGTTTCATCTTTCTAGAATTCATTTTTCACATCTTCATTCACTGGGATTCTGGACC	intergenic							3.05597	4.81168
ASHGA5P018433	0.00095861	0.0254289	3.3728	down	noncoding	NR_027889	TMEM189	RefSeq	2399	chr20	-	48740273	48770335	TACTCGCCAGTGCCCTTCACTCTCTGAAGAACAGCCATGCCTGAATCAGAGTCTGCAGAC	exon sense-overlapping	NM_001162505	TMEM189	transmembrane protein 189 isoform 2	-	48740273	48770335	9.88791	11.6419
ASHGA5P018433	0.00095861	0.0254289	3.3728	down	noncoding	NR_027889	TMEM189	RefSeq	2399	chr20	-	48740273	48770335	TACTCGCCAGTGCCCTTCACTCTCTGAAGAACAGCCATGCCTGAATCAGAGTCTGCAGAC	exon sense-overlapping	NM_199129	TMEM189	transmembrane protein 189 isoform 1	-	48740273	48770335	9.88791	11.6419
ASHGA5P018433	0.00095861	0.0254289	3.3728	down	noncoding	NR_027889	TMEM189	RefSeq	2399	chr20	-	48740273	48770335	TACTCGCCAGTGCCCTTCACTCTCTGAAGAACAGCCATGCCTGAATCAGAGTCTGCAGAC	exon sense-overlapping	NM_199203	TMEM189-UBE2V1	TMEM189-UBE2V1 fusion protein	-	48697660	48770335	9.88791	11.6419
ASHGA5P035851	0.0116953	0.0498997	3.3706	down	noncoding	ENST00000417692	AC079807.2	GENCODE	656	chr2	+	48133968	48134949	CCCCTCACCTCCCAAGTTTAAATAAGAACTTATTTTAGACTACATGATCCTGTTTTCAAT	intergenic							7.24425	8.99726
ASHGA5P040285	0.0190388	0.0649248	3.37001	down	noncoding	TCONS_00022761	XLOC_011044	LincRNAs identified by Cabili et al	725	chr14	-	61108285	61109382	AGACACCTCCTGTCTCCTTCTTCGCTTCCTGGGGTCTTGGCTTTGGTTTTCGGACCCAAA	intergenic							7.1319	8.88465
ASHGA5P015966	0.0061964	0.0409468	3.36428	down	noncoding	NR_046326	KDM5B-AS1	RefSeq	650	chr1	+	202780073	202781041	GTTCCTTCCGTCTCCAGTGCACCGGCTTTCCCTCGTCCTCTGCGCAGTCCATCTCAGCTC	intergenic							6.2598	8.01009
ASHGA5P000374	0.00783777	0.0433873	3.35849	down	noncoding	chr2:90959050-90986900+	chr2:90959050-90986900	LincRNAs identified by Khalil et al	27850	chr2	+	91595323	91623173	TATATGGATCACTTGTTTCTGTTGAGTTACAGATTCAGCTGGCTATTTCTCCCAATGTTA	intergenic							3.94311	5.69093
ASHGA5P018136	0.00115033	0.026449	3.35477	down	noncoding	NR_003592	TTTY7B	RefSeq	1124	chrY	+	6317508	6325947	GACATTCATGGCGAATGTGCGGGACCCCATCCATCCCTCACCAGCTTGTATCCTCAGCTT	intergenic							7.91345	9.65967
ASHGA5P032993	0.0155494	0.0578851	3.35429	down	noncoding	ENST00000426489	AC024619.2	GENCODE	495	chr17	+	27342359	27343530	GTTTTGTTTTTCCTTTTCTTGCTATTTGGCCAGGAGCAGCAGTAGCAGCAGCTCCAAGAA	intergenic							3.76024	5.50625
ASHGA5P028081	0.0349495	0.0936013	3.35087	down	noncoding	ENST00000556850	RP11-474N8.5	GENCODE	459	chr12	+	57390042	57392225	GGTCTGTCTCCTCTGTGGATTCACGCATGTATCAACCTCATTAAACTATGCCAAACTTTT	exon sense-overlapping	NM_007264	GPR182	G-protein coupled receptor 182	+	57388354	57390469	5.96824	7.71278
ASHGA5P049709	0.0119357	0.050497	3.35053	down	noncoding	uc021tza.1	LOC51326	UCSC_knowngene	144	chr17	-	45098945	45099089	AATTATGCGGGGTCACTGGCACAAATGATGAGGCATCTCCTGGAAGCTTAACTTCTTATC	intronic antisense	ENST00000439730	GOSR2	golgi SNAP receptor complex member 2 [Source:HGNC Symbol;Acc:4431]	+	45000498	45105003	5.21216	6.95655
ASHGA5P054602	0.0275882	0.0806564	3.33514	down	noncoding	uc001ldf.3	EMX2OS	UCSC_knowngene	7025	chr10	-	119243803	119301924	CCCTCAGCCACCGCCTCCTCCTCCACCAGCACCACTCCCTCCGGGGCACCCCGGTCCCTG	bidirectional	NM_001165924	EMX2	homeobox protein EMX2 isoform 2	+	119301955	119309057	11.0787	12.8165
ASHGA5P054602	0.0275882	0.0806564	3.33514	down	noncoding	uc001ldf.3	EMX2OS	UCSC_knowngene	7025	chr10	-	119243803	119301924	CCCTCAGCCACCGCCTCCTCCTCCACCAGCACCACTCCCTCCGGGGCACCCCGGTCCCTG	bidirectional	NM_004098	EMX2	homeobox protein EMX2 isoform 1	+	119301955	119309057	11.0787	12.8165
ASHGA5P033000	0.0106178	0.0480171	3.33459	down	noncoding	ENST00000581240	RP11-68I3.5	GENCODE	270	chr17	+	27966644	27967843	ACTCCTCCCTACTCAAGGGTAACCTCCATCCTGAATTTTGTGCTTATCATTCCCTTTTTT	intronic antisense	NM_033389	SSH2	protein phosphatase Slingshot homolog 2	-	27952964	28257018	5.52473	7.26224
ASHGA5P000493	0.0215758	0.0698547	3.32856	down	noncoding	chr7:1314975-1333125-	chr7:1314975-1333125	LincRNAs identified by Khalil et al	18150	chr7	-	1348449	1366599	GGTGGAGGCTGGCTAGGAGTGTGGGGACAGACATCGAATAATAATAATACTTCAATATAA	intergenic							4.21181	5.94671
ASHGA5P046418	0.00641677	0.0410595	3.3238	down	noncoding	ENST00000420865	RP11-309M23.1	GENCODE	588	chrX	+	950955	955100	CCGTCAACAAAACGCTAATAAGTGCAGAAAGACTGTTTAGCAGGAAACATGTCCAAAAAA	intergenic							3.44554	5.17837
ASHGA5P049683	0.0350115	0.0936858	3.3189	down	noncoding	ENST00000433702	TMEM106A-AS1	GENCODE	966	chr17	-	41373436	41381062	CCACTCCAAAAGCCACCCACTCTAGAAGAGGAGGCTGCCAGGAATAAAATGTAATTTTTT	intergenic							5.32586	7.05657
ASHGA5P016581	0.00495621	0.0391949	3.31848	down	noncoding	uc001fts.4	BC038194	UCSC_knowngene	1060	chr1	-	159315958	159438858	GGTAAAATAAGCTTCAAGATTCCTCTTTTCATCTCTCACTGAAGAAATATACCCCTTTTC	intronic antisense	NM_012351	OR10J1	olfactory receptor 10J1	+	159409511	159410600	3.63121	5.36173
ASHGA5P037794	0.00400668	0.0377672	3.31638	down	noncoding	uc002zof.3	DQ786190	UCSC_knowngene	2139	chr22	+	18847155	18849294	CTCAAGAGTTTCATTTTATGGTCTTTCTCTTGTTCTGTAAAATGTGGGCATGGATAGATA	intergenic							3.09539	4.825
ASHGA5P037282	0.00173698	0.0294307	3.30595	down	noncoding	TCONS_00025268	XLOC_012073	LincRNAs identified by Cabili et al	447	chr17	+	1243627	1244183	CTGAGGTAACTTGACAACCCATAATCGCTGTTCTCCATGTAAACTGTGGCTCTATTTGTC	intergenic							3.28239	5.00746
ASHGA5P043610	0.00326423	0.0360585	3.30424	down	noncoding	ENST00000434504	AC083863.7	GENCODE	538	chr7	+	33055670	33056504	ATGTCAGTTCTAACTCACTTCTTTTTCCAACTATGAATGTTAAGGCTTCAAAGTTGCTGC	intronic antisense	NM_001002009	NT5C3	cytosolic 5'-nucleotidase 3 isoform 2	-	33053724	33102409	2.95952	4.68384
ASHGA5P043610	0.00326423	0.0360585	3.30424	down	noncoding	ENST00000434504	AC083863.7	GENCODE	538	chr7	+	33055670	33056504	ATGTCAGTTCTAACTCACTTCTTTTTCCAACTATGAATGTTAAGGCTTCAAAGTTGCTGC	intronic antisense	NM_001002010	NT5C3	cytosolic 5'-nucleotidase 3 isoform 1	-	33053724	33102409	2.95952	4.68384
ASHGA5P043610	0.00326423	0.0360585	3.30424	down	noncoding	ENST00000434504	AC083863.7	GENCODE	538	chr7	+	33055670	33056504	ATGTCAGTTCTAACTCACTTCTTTTTCCAACTATGAATGTTAAGGCTTCAAAGTTGCTGC	intronic antisense	NM_001166118	NT5C3	cytosolic 5'-nucleotidase 3 isoform 3	-	33053724	33080777	2.95952	4.68384
ASHGA5P043610	0.00326423	0.0360585	3.30424	down	noncoding	ENST00000434504	AC083863.7	GENCODE	538	chr7	+	33055670	33056504	ATGTCAGTTCTAACTCACTTCTTTTTCCAACTATGAATGTTAAGGCTTCAAAGTTGCTGC	intronic antisense	NM_016489	NT5C3	cytosolic 5'-nucleotidase 3 isoform 2	-	33053724	33080777	2.95952	4.68384
ASHGA5P040185	0.0071149	0.0424363	3.30253	down	noncoding	ENST00000458155	BX004987.5	GENCODE	1410	chr1	+	143391567	143399528	GAGTTTGACATACTCAAATTGCCCAAATTTCAGCTGTTTAAACAACCAAGTCATCATTGA	intergenic							2.8369	4.56047
ASHGA5P049028	0.0258843	0.0771463	3.30181	down	noncoding	uc021taz.1	HM587424	UCSC_knowngene	622	chr16	+	3048955	3050814	TCCTCCTCCAGGGTTCCATGGGGCCAATGGTTTTAGGAATAGTGAGTCAGACCCAGGGGA	intergenic							4.99097	6.71423
ASHGA5P032205	0.00187621	0.0303784	3.30032	down	noncoding	ENST00000418821	AC015922.6	GENCODE	951	chr17	-	15709554	15721056	TAATGCCCTTCAAATCAACAAGAGGATTTCCTGTGAGGGGTGGTCCTGTTTTCTGACACT	intergenic							4.44133	6.16393
ASHGA5P033291	0.0315248	0.0874701	3.29846	down	noncoding	ENST00000452766	RP11-488L4.1	GENCODE	597	chr1	-	234086183	234086853	CCTAGTCTCTCTGATTTGTTTTTCTCTGCCATTTTTGGTTTGAGGTGGCACTCAACATAT	intronic antisense	NM_173508	SLC35F3	solute carrier family 35 member F3	+	234040678	234460262	3.2896	5.0114
ASHGA5P006531	0.0449907	0.110071	3.28742	down	noncoding	NR_024564	LOC100130264	RefSeq	1789	chr20	-	19222945	19265240	CACCACCACATGTGAAGCCTCATGACTTATATGTCAGATTAAGCCTTTTGTTAAGAAGAT	intronic antisense	NM_020689	SLC24A3	sodium/potassium/calcium exchanger 3 precursor	+	19193289	19703541	3.37755	5.0945
ASHGA5P042392	0.015387	0.0575127	3.2835	down	noncoding	ENST00000422366	HCG25	GENCODE	702	chr6	+	33217360	33219716	TTTTTCTTTTCCACTTCCCTTACCACTGATCCCATCATTACCATATTTTCCTCATACCTT	natural antisense	NM_022553	VPS52	vacuolar protein sorting-associated protein 52 homolog	-	33218048	33239662	7.57258	9.28781
ASHGA5P041077	0.00437326	0.0384788	3.28082	down	noncoding	ENST00000511712	RP11-53O19.2	GENCODE	591	chr5	+	44753050	44765846	CACACATGTGCACACACACAGAGAATAATATAGGTCTAATGGCTTAGAATTTACACTTTA	intergenic							4.33047	6.04452
ASHGA5P031859	0.00106464	0.0258808	3.27818	down	noncoding	TCONS_00006575	XLOC_003199	LincRNAs identified by Cabili et al	1198	chr3	-	106096978	106146792	AACTGTGTCCCGCATTGGCATTCCTTTGGCAGCTTCCACTTCTCTGTCCCCTTGAGCAAA	intergenic							7.84395	9.55685
ASHGA5P046265	0.0367999	0.0971183	3.26908	down	noncoding	ENST00000424887	TCEAL3-AS1	GENCODE	361	chrX	-	102881003	102881420	TCTCTCATGTGGCTTCTCAGATTGCTTGCTTTCTAGTGCTGCTAATAGAAGACACTATAG	intergenic							4.50623	6.21511
ASHGA5P055781	0.000281332	0.0157153	3.26649	down	noncoding	NR_038125	CAPZB	RefSeq	2109	chr1	-	19665266	19811201	AGGGTCCCCTTCCCTGTACCTGGGGCGCGCCTTCTTTGCAGCCTTTGGGGAGCGAGGGGA	exon sense-overlapping	NM_001206540	CAPZB	F-actin-capping protein subunit beta isoform 2	-	19665266	19812066	6.75812	8.46586
ASHGA5P055781	0.000281332	0.0157153	3.26649	down	noncoding	NR_038125	CAPZB	RefSeq	2109	chr1	-	19665266	19811201	AGGGTCCCCTTCCCTGTACCTGGGGCGCGCCTTCTTTGCAGCCTTTGGGGAGCGAGGGGA	exon sense-overlapping	NM_004930	CAPZB	F-actin-capping protein subunit beta isoform 1	-	19665266	19812066	6.75812	8.46586
ASHGA5P057432	0.00491323	0.0391245	3.26022	down	noncoding	TCONS_00017287	XLOC_008109	LincRNAs identified by Cabili et al	578	chrX	-	6685656	6701527	CCCGCCAAAGGAGCCCACTCCATTATGAAAAAGAACTTCAAGCAAATTTGAATCTTTCTT	intergenic							4.87676	6.58173
ASHGA5P008493	0.0010731	0.0258808	3.25704	down	noncoding	ENST00000343738	PKD1P6	pseudogene	4769	chr16	-	15219098	15248421	GGGCCCACCAAGGGAGGCTGGCGGGTGTGCGCTGAACTTTGGGCCCCGCGGGAGCAGCAC								5.21685	6.92042
ASHGA5P039815	0.000548415	0.020309	3.25651	down	noncoding	uc001edc.1	BC047723	UCSC_knowngene	1208	chr1	+	113499036	113542118	GCTCCCTGGTAAGCAAGATTATGCTATAATCTTAAAATAGGCTCACACCTGTAATCCCAG	natural antisense	ENST00000429288	SLC16A1	solute carrier family 16, member 1 (monocarboxylic acid transporter 1) [Source:HGNC Symbol;Acc:10922]	-	113460381	113499635	4.68418	6.38751
ASHGA5P032094	0.0340486	0.0919094	3.25196	down	noncoding	ENST00000575741	RP11-235E17.6	GENCODE	874	chr17	-	3558914	3561386	ACCTGGATGAATGAACACACACCCTTCCTTTCCCAGGCTCTGCCGTGTCTTCTGTCAAAG	natural antisense	NM_001031681	CTNS	cystinosin isoform 1 precursor	+	3539761	3566397	6.19133	7.89264
ASHGA5P032094	0.0340486	0.0919094	3.25196	down	noncoding	ENST00000575741	RP11-235E17.6	GENCODE	874	chr17	-	3558914	3561386	ACCTGGATGAATGAACACACACCCTTCCTTTCCCAGGCTCTGCCGTGTCTTCTGTCAAAG	natural antisense	NM_004937	CTNS	cystinosin isoform 2 precursor	+	3539761	3566397	6.19133	7.89264
ASHGA5P039960	0.00821288	0.0439278	3.24816	down	noncoding	ENST00000507344	RP11-51P8.1	GENCODE	768	chr4	+	66724478	66725922	CAAACATTTTTAGGTATGTAGAAACAATGTATACACACACATGCACACACACATTAGTGC	intergenic							6.14958	7.84921
ASHGA5P016715	0.0119078	0.0504239	3.23737	down	noncoding	ENST00000433303	AL035610.2	GENCODE	276	chr21	-	29535920	29542462	GAAACAAAAGATTACAGCAAAGCTTTCTGCTTTCCTTTCTTGCTCTGATACCCTCAAAAT	intergenic							7.7325	9.42733
ASHGA5P023925	0.0310201	0.0866713	3.22973	down	noncoding	HMlincRNA970-	HMlincRNA970	LincRNAs identified by Khalil et al	8480	chr3	-	181954931	181963411	TTAAGCCCTTTTCCTTCCATGTTCTTACAATATTCCCGAAAACCATTCCTAGCACTCCCT	intergenic							6.55692	8.24833
ASHGA5P022121	0.00595593	0.0405012	3.22792	down	noncoding	ENST00000549723	RP11-887P2.1	GENCODE	354	chr12	-	93960514	93965066	GCCCTCCCCGAGTTTGCCATCTCCGTACCACCACCACCACCACACACAGCACCCTCAAGA	intronic antisense	NM_001270467	SOCS2	suppressor of cytokine signaling 2	+	93964174	93970521	10.2848	11.9754
ASHGA5P022121	0.00595593	0.0405012	3.22792	down	noncoding	ENST00000549723	RP11-887P2.1	GENCODE	354	chr12	-	93960514	93965066	GCCCTCCCCGAGTTTGCCATCTCCGTACCACCACCACCACCACACACAGCACCCTCAAGA	intronic antisense	NM_001270468	SOCS2	suppressor of cytokine signaling 2	+	93964756	93970521	10.2848	11.9754
ASHGA5P022121	0.00595593	0.0405012	3.22792	down	noncoding	ENST00000549723	RP11-887P2.1	GENCODE	354	chr12	-	93960514	93965066	GCCCTCCCCGAGTTTGCCATCTCCGTACCACCACCACCACCACACACAGCACCCTCAAGA	intronic antisense	NM_003877	SOCS2	suppressor of cytokine signaling 2	+	93963597	93970521	10.2848	11.9754
ASHGA5P043736	0.00366131	0.0368972	3.22728	down	noncoding	ENST00000448088	AC004878.8	GENCODE	280	chr7	+	74862850	74863847	AGTATCCCTGGGAGAAGAAAACAGCTCTGGTAGCAGATCACTCAAGCCCGGGAGGTGTAG	intronic antisense	NM_001145064	GATSL2	GATS-like protein 2	-	74807604	74867341	3.15001	4.84033
ASHGA5P049019	0.0034884	0.0362019	3.22653	down	noncoding	ENST00000562807	ERVK13-1	GENCODE	594	chr16	-	2713082	2721462	TGTGAGAAGCCCCCTTCCCAGTGAACTTTCCCTTGTGTGCCCGCGTGGACAGCCAACAGG	intergenic							10.341	12.031
ASHGA5P037587	0.0177779	0.0622833	3.22609	down	noncoding	ENST00000447720	LINC00281	GENCODE	3215	chr22	-	21655278	21679331	CACCGTACACGACATCACTAACGAGGACGCCACACACGACATCGCTAACGAGGATACTGT	intergenic							4.24375	5.93354
ASHGA5P045298	0.0458295	0.11115	3.21986	down	noncoding	uc004ami.1	AK097447	UCSC_knowngene	2208	chr9	-	84545140	84592004	AGACACCTTTGCAGAAGAAAAAACAACTTCCTCTCTTCCTCTACTTCACTCTGGCAAGTT	natural antisense	NM_001145197	FAM75D4	putative protein FAM75D4	+	84543342	84549913	5.21667	6.90367
ASHGA5P045298	0.0458295	0.11115	3.21986	down	noncoding	uc004ami.1	AK097447	UCSC_knowngene	2208	chr9	-	84545140	84592004	AGACACCTTTGCAGAAGAAAAAACAACTTCCTCTCTTCCTCTACTTCACTCTGGCAAGTT	natural antisense	NM_207416	FAM75D3	putative protein FAM75D3	+	84558414	84565009	5.21667	6.90367
ASHGA5P030995	0.00124178	0.0269963	3.21121	down	noncoding	ENST00000561676	RP11-457I16.2	GENCODE	536	chr16	-	18581776	18583005	TCCATGAACTCCACTCCCTGGAGTCCTTTGCTAAGAGCAATGGAAAAAGAAACCAGAGAG	intergenic							7.12759	8.81071
ASHGA5P047914	0.0167161	0.0603279	3.20665	down	noncoding	TCONS_00013447	XLOC_006100	LincRNAs identified by Cabili et al	341	chr7	+	52561401	52569695	AACTTCTCATAGAGGCTGGCTGTGTTAGACTTTTGCTAAGGCCAAGAGTTTTATTTTGTT	intergenic							3.59936	5.28043
ASHGA5P058688	0.0316357	0.0877026	3.2052	down	noncoding	uc.86+	uc.86	UCR	340	chr2	+	157660109	157660449	TAATTAGGAGGCCCTTCCCTTCCAGAGTTACTATTTCTATTGACATTTTCCATGCATGAG	intergenic							7.99385	9.67427
ASHGA5P019702	0.0134265	0.0534958	3.20286	down	noncoding	ENST00000500986	RP11-887P2.1	GENCODE	1655	chr12	-	93936239	93965544	GACCCTGGAGAGTTTGCCATCTCCGTACCACCACCACCACCACACACAGCACCCTCAAGA	intronic antisense	NM_001270467	SOCS2	suppressor of cytokine signaling 2	+	93964174	93970521	8.48513	10.1645
ASHGA5P019702	0.0134265	0.0534958	3.20286	down	noncoding	ENST00000500986	RP11-887P2.1	GENCODE	1655	chr12	-	93936239	93965544	GACCCTGGAGAGTTTGCCATCTCCGTACCACCACCACCACCACACACAGCACCCTCAAGA	intronic antisense	NM_001270468	SOCS2	suppressor of cytokine signaling 2	+	93964756	93970521	8.48513	10.1645
ASHGA5P019702	0.0134265	0.0534958	3.20286	down	noncoding	ENST00000500986	RP11-887P2.1	GENCODE	1655	chr12	-	93936239	93965544	GACCCTGGAGAGTTTGCCATCTCCGTACCACCACCACCACCACACACAGCACCCTCAAGA	intronic antisense	NM_003877	SOCS2	suppressor of cytokine signaling 2	+	93963597	93970521	8.48513	10.1645
ASHGA5P019702	0.0134265	0.0534958	3.20286	down	noncoding	ENST00000500986	RP11-887P2.1	GENCODE	1655	chr12	-	93936239	93965544	GACCCTGGAGAGTTTGCCATCTCCGTACCACCACCACCACCACACACAGCACCCTCAAGA	natural antisense	NM_001270469	SOCS2	suppressor of cytokine signaling 2	+	93965456	93970521	8.48513	10.1645
ASHGA5P019702	0.0134265	0.0534958	3.20286	down	noncoding	ENST00000500986	RP11-887P2.1	GENCODE	1655	chr12	-	93936239	93965544	GACCCTGGAGAGTTTGCCATCTCCGTACCACCACCACCACCACACACAGCACCCTCAAGA	natural antisense	NM_001270470	SOCS2	suppressor of cytokine signaling 2	+	93965456	93970521	8.48513	10.1645
ASHGA5P018473	0.0050444	0.039342	3.20022	down	noncoding	ENST00000453988	RP5-836N10.1	GENCODE	706	chr1	-	112147001	112151345	CGACCCCGTCTGGGAGGGTGGCTGTCAATAGATTGGCCCAAAAGGAAGAACAAGGAAAAG	intronic antisense	ENST00000356415	RAP1A	RAP1A, member of RAS oncogene family [Source:HGNC Symbol;Acc:9855]	+	112084839	112255735	4.44352	6.12169
ASHGA5P049027	0.00370746	0.0369302	3.19994	down	noncoding	NR_033861	LINC00514	RefSeq	3221	chr16	+	3039054	3044510	TCTCTCTCCCACGAGCCCTTCCACTAAGAATGGCTATGGAGCAGGTAGAGATGGGAGTGG	intergenic							6.06435	7.74239
ASHGA5P048430	7.59275e-05	0.0112092	3.19918	down	noncoding	BM807096		LincRNAs identified by Khalil et al	1041	chr4	-	158967911	158968773	GAGCCCTTGTACCTATAATCAGGGAAAATGTTTGCATATATGCATGAGATCTACTTTTAA	intergenic							4.87422	6.55192
ASHGA5P016151	0.0101432	0.0471188	3.19637	down	noncoding	ENST00000452942	RP11-429G19.2	GENCODE	746	chr10	-	97635156	97667639	CCGTGAGCGTCAGCTGGCTTGGCTTTTTCAGAGGAAACAGAGACTCTCAGACATGAATAC	natural antisense	NM_001098175	ENTPD1	ectonucleoside triphosphate diphosphohydrolase 1 isoform 2	+	97471535	97637023	4.69944	6.37588
ASHGA5P016151	0.0101432	0.0471188	3.19637	down	noncoding	ENST00000452942	RP11-429G19.2	GENCODE	746	chr10	-	97635156	97667639	CCGTGAGCGTCAGCTGGCTTGGCTTTTTCAGAGGAAACAGAGACTCTCAGACATGAATAC	natural antisense	NM_001164178	ENTPD1	ectonucleoside triphosphate diphosphohydrolase 1 isoform 3	+	97515408	97637023	4.69944	6.37588
ASHGA5P016151	0.0101432	0.0471188	3.19637	down	noncoding	ENST00000452942	RP11-429G19.2	GENCODE	746	chr10	-	97635156	97667639	CCGTGAGCGTCAGCTGGCTTGGCTTTTTCAGAGGAAACAGAGACTCTCAGACATGAATAC	natural antisense	NM_001164179	ENTPD1	ectonucleoside triphosphate diphosphohydrolase 1 isoform 4	+	97515672	97637023	4.69944	6.37588
ASHGA5P016151	0.0101432	0.0471188	3.19637	down	noncoding	ENST00000452942	RP11-429G19.2	GENCODE	746	chr10	-	97635156	97667639	CCGTGAGCGTCAGCTGGCTTGGCTTTTTCAGAGGAAACAGAGACTCTCAGACATGAATAC	natural antisense	NM_001164181	ENTPD1	ectonucleoside triphosphate diphosphohydrolase 1 isoform 5	+	97515408	97637023	4.69944	6.37588
ASHGA5P016151	0.0101432	0.0471188	3.19637	down	noncoding	ENST00000452942	RP11-429G19.2	GENCODE	746	chr10	-	97635156	97667639	CCGTGAGCGTCAGCTGGCTTGGCTTTTTCAGAGGAAACAGAGACTCTCAGACATGAATAC	natural antisense	NM_001164182	ENTPD1	ectonucleoside triphosphate diphosphohydrolase 1 isoform 6	+	97515672	97637023	4.69944	6.37588
ASHGA5P016151	0.0101432	0.0471188	3.19637	down	noncoding	ENST00000452942	RP11-429G19.2	GENCODE	746	chr10	-	97635156	97667639	CCGTGAGCGTCAGCTGGCTTGGCTTTTTCAGAGGAAACAGAGACTCTCAGACATGAATAC	natural antisense	NM_001164183	ENTPD1	ectonucleoside triphosphate diphosphohydrolase 1 isoform 6	+	97515672	97637023	4.69944	6.37588
ASHGA5P016151	0.0101432	0.0471188	3.19637	down	noncoding	ENST00000452942	RP11-429G19.2	GENCODE	746	chr10	-	97635156	97667639	CCGTGAGCGTCAGCTGGCTTGGCTTTTTCAGAGGAAACAGAGACTCTCAGACATGAATAC	natural antisense	NM_001776	ENTPD1	ectonucleoside triphosphate diphosphohydrolase 1 isoform 1	+	97515672	97637023	4.69944	6.37588
ASHGA5P030046	0.0268381	0.0790728	3.19525	down	noncoding	TCONS_00007997	XLOC_003460	LincRNAs identified by Cabili et al	482	chr4	+	13487673	13491548	AAGAAAAAAGGAGAGTTACAGGGGAGTCCTCCTCCTCCCTTCCTTTGCTGTCATTATTAG	intergenic							7.82204	9.49797
ASHGA5P040365	0.0100796	0.0470676	3.1933	down	noncoding	ENST00000511029	CTD-2306M5.1	GENCODE	565	chr5	-	25404841	25422964	CACTTGCAGTGGAGATGATTCCATTGTAAAATGTTTCTTCATTCCCAATAGCACAATATA	intergenic							3.43346	5.10851
ASHGA5P027020	0.00751967	0.0429609	3.18924	down	noncoding	uc001qtw.1	BC039122	UCSC_knowngene	2679	chr12	-	8232080	8234759	GTATCTTAAAACTCATTTTCCATTCACCCCTTTCCCTCACCATGTAAGTATATTCAAGTC	intronic antisense	ENST00000545179	NECAP1	NECAP endocytosis associated 1 [Source:HGNC Symbol;Acc:24539]	+	7926147	8250349	8.02181	9.69502
ASHGA5P043281	0.00948085	0.0461336	3.18311	down	noncoding	TCONS_00019584	XLOC_009382	LincRNAs identified by Cabili et al	386	chr11	-	15932519	15933620	TGTTGAATTCCTTAAGGTGTCTGGAAAAAGAGAGAGAGAGAGCCAAAGAGGAAGAGGGGA	intergenic							4.29914	5.96958
ASHGA5P038036	0.00420888	0.0381989	3.18045	down	noncoding	TCONS_00016476	XLOC_007848	LincRNAs identified by Cabili et al	339	chr9	-	126101092	126102106	CTTCAGACTCTGCCTCTCTCAATCCTTATACAAGGCCAGAGAGCGCTTGAGGCTTCCAGG	intergenic							4.25481	5.92404
ASHGA5P035372	0.0189383	0.0646777	3.17584	down	noncoding	TCONS_00004454	XLOC_002331	LincRNAs identified by Cabili et al	1481	chr2	-	134785345	134788845	TTCACAGCTCTGAAAAAGTGAGAACAGCGAATTCACTTCCCTTCTCCCAAAAGGCATGTG	intergenic							6.63508	8.30221
ASHGA5P048840	0.0212332	0.0693986	3.17042	down	noncoding	uc010bmo.1	AGSK1	UCSC_knowngene	2067	chr15	-	83144202	83182928	CTCCCAAGAACAGGGAGATAAACACCACCATCATCTGAGAGCCGGGAAGGGGAAGGCGTA	intergenic							5.47444	7.13911
ASHGA5P027676	0.00730498	0.0427135	3.16541	down	noncoding	ENST00000545853	RP11-407A16.3	GENCODE	456	chr12	-	127094579	127174806	GAGAAGAAAAAGGCCTCCTGCCTCCTCTTCTTTCACCAGACACTGTGGGCCCACAATTCC	intergenic							6.49158	8.15397
ASHGA5P056122	0.0157608	0.0583891	3.16415	down	noncoding	TCONS_00026989	XLOC_013039	LincRNAs identified by Cabili et al	1024	chr19	+	32563114	32565007	CAGTCACCTGTCTGTCCACAATGACAATGGGGCATGAAAAAATGCCCTAACTCAGGGCAT	intergenic							3.04144	4.70326
ASHGA5P038052	0.0328354	0.0897452	3.16146	down	noncoding	TCONS_00024285	XLOC_011677	LincRNAs identified by Cabili et al	5246	chr16	+	24715880	24721546	ACTCGGCTATTCCACTTCGATGATTCTCTGTCACAGGTGTCTTAAATACATGAACAAAGG	intergenic							4.17642	5.83701
ASHGA5P028390	0.0257132	0.0768832	3.16003	down	noncoding	ENST00000443685	RP11-662M24.1	GENCODE	527	chr12	+	131143285	131145039	ATTCTCTACCCTTCTCTCTGGAATCTCATGGGAATCTCCTCTCGGTGACTGTTCTTATTG	intronic antisense	ENST00000536002	RIMBP2	RIMS binding protein 2 [Source:HGNC Symbol;Acc:30339]	-	130916203	131200826	5.18172	6.84166
ASHGA5P037493	0.00325528	0.0360585	3.15864	down	noncoding	TCONS_00024509	XLOC_011826	LincRNAs identified by Cabili et al	298	chr16	+	88219138	88219657	TGAATATAGTATATGCACACACACACTTATGTGCGCAGACCCACAGACACACACATTCAC	intergenic							5.13474	6.79405
ASHGA5P026681	0.00266091	0.03424	3.15487	down	noncoding	ENST00000530030	RP11-718B12.3	GENCODE	865	chr11	+	82530208	82533921	CTACCCATTGACTCCAGGCAGTTAAAGTAACAAAAACAGAAAATAAAAAGCACCCAATTC	intergenic							3.2102	4.86778
ASHGA5P000186	0.00210909	0.0314014	3.14945	down	noncoding	chr10:102392025-102402450+	chr10:102392025-102402450	LincRNAs identified by Khalil et al	10425	chr10	+	102402035	102412460	AAGCCTGTATTCCTTCTGCTATCAGACAGAACAAGCCCTTCACAATAGGAAGTTCCCTTC	intergenic							6.32224	7.97734
ASHGA5P041468	0.0208352	0.0684923	3.14876	down	noncoding	ENST00000512096	MIR143HG	GENCODE	555	chr5	+	148786251	148803960	AACCACTCCTTCCTTAGGGGGTAAAAGCAACATTCAGCACCGGGGGCAGGTCAAGGCAAG	intergenic							5.1811	6.83589
ASHGA5P046080	0.00871722	0.0446316	3.1476	down	noncoding	uc003jaj.2	LOC100233156	UCSC_knowngene	1315	chrUn_gl000218	-	62408	97454	TGGTGAATTTCAGCCAAAGTGGCCAAAGAAATCCTGTTCCTGTGATAATGACGCCATCAG	intergenic							3.17257	4.82683
ASHGA5P034897	0.0107684	0.0483895	3.13053	down	noncoding	ENST00000420452	MYCNOS	GENCODE	1313	chr2	-	16076386	16081704	CAGTTTCTCCTAGGATCTTCACACCTCCCTCAAAATGTGTACATTTTTACTGATTAAATA	intronic antisense	NM_005378	MYCN	N-myc proto-oncogene protein	+	16080682	16087129	5.57202	7.21842
ASHGA5P026942	0.00129166	0.027164	3.12637	down	noncoding	ENST00000532886	RP11-627G23.1	GENCODE	4387	chr11	+	134349192	134375507	CCTGTGCCTGGGTGATTGTGAACTTGTAACAAATGTGATCTTATTTATGTTTTGAAAAAG	intergenic							3.14817	4.79266
ASHGA5P027638	0.00014988	0.0133081	3.12211	down	noncoding	ENST00000535720	RP11-173P15.3	GENCODE	583	chr12	-	121136066	121137344	AAATAAAGAATCCCACCCCTTTAACCTAAACTTCATGTACCTATATCTTGGAGGAGCCAC	natural antisense	NM_014730	MLEC	malectin precursor	+	121124948	121139667	8.12957	9.77209
ASHGA5P056695	0.00558818	0.0401939	3.11941	down	noncoding	TCONS_00007884	XLOC_004128	LincRNAs identified by Cabili et al	571	chr4	-	153662549	153667773	CCCCTGGACCATCACGGACACCGAGCTTCAGGTAACTCTCACAGTGGAGGAAGGCAGGAA	intergenic							5.97874	7.62001
ASHGA5P036668	0.000216498	0.0142595	3.1161	down	noncoding	ENST00000425939	RP4-705D16.3	GENCODE	1101	chr20	-	16695488	16711593	CTGCCCTGTTTGCTGTTTCTGGTGGTGCAGAGCATTTCAAAATTAAAAATTTAAGACATT	intronic antisense	NM_003092	SNRPB2	U2 small nuclear ribonucleoprotein B''	+	16710608	16722417	3.93192	5.57166
ASHGA5P036668	0.000216498	0.0142595	3.1161	down	noncoding	ENST00000425939	RP4-705D16.3	GENCODE	1101	chr20	-	16695488	16711593	CTGCCCTGTTTGCTGTTTCTGGTGGTGCAGAGCATTTCAAAATTAAAAATTTAAGACATT	intronic antisense	NM_198220	SNRPB2	U2 small nuclear ribonucleoprotein B''	+	16710608	16722417	3.93192	5.57166
ASHGA5P029321	0.0137763	0.0542381	3.11445	down	noncoding	TCONS_00010234	XLOC_004700	LincRNAs identified by Cabili et al	1647	chr5	-	1042002	1043709	CCATTCACACACGATCTCACCCATTCATTCACAAACTCACCCACTCGTTCACAGCCACTC	intergenic							5.71558	7.35456
ASHGA5P023476	0.00819355	0.0439171	3.10733	down	noncoding	ENST00000581690	RP11-805F19.1	GENCODE	525	chr18	-	15159722	15164466	GAAAGAGTATCTGCCATTGAAGATTGGATATCTTGTTGTGATAAAGGCATGACATTATAC	intergenic							3.32287	4.95854
ASHGA5P015174	0.00514215	0.0396122	3.10405	down	noncoding	ENST00000417516	AC004041.2	GENCODE	390	chr5	-	131973741	131991584	AGTTGTTTTTTTACTTGGGTGAGTTGGCTCCCCAGGCTTTTGAGATACCTGCCTTTTGTC	natural antisense	NM_005732	RAD50	DNA repair protein RAD50	+	131892615	131980313	3.99256	5.62671
ASHGA5P031152	0.0323826	0.088869	3.10272	down	noncoding	ENST00000570024	AC140542.2	GENCODE	1325	chr16	-	47883224	47921041	TTCTGTCCTTCTCTCCTTTTAGATTGTAAGCTACCCAAAGTCCATCTCCATGGGTTTTTT	intergenic							5.12142	6.75495
ASHGA5P049432	0.00465295	0.0389021	3.10244	down	noncoding	ENST00000577064	RP13-580F15.2	GENCODE	575	chr17	-	4385442	4386879	TTAGGTCCAGGTAGGCTGGCCCCTTCCTCCTCTCCCAGGAACCCCAACCTGCTGGGCCCA	intronic antisense	NM_182538	SPNS3	protein spinster homolog 3	+	4337218	4391499	9.45677	11.0902
ASHGA5P054268	0.015168	0.0569856	3.10023	down	noncoding	TCONS_00013287	XLOC_005955	LincRNAs identified by Cabili et al	1258	chr7	+	389256	390969	ACTCCACACAACGTCCAAAACTCACGCTCACACACATCAAAACACAACTTCGCACAACGT	intergenic							4.80554	6.43791
ASHGA5P030377	0.014612	0.0559771	3.0983	down	noncoding	ENST00000557558	RP11-2C7.1	GENCODE	729	chr15	+	26110441	26122358	TCAGCCCTTCCTTTTTGATTCCCAAGAGCAAATTTTGGAAATAAAGCAACCTGAAAACAT	intergenic							5.76652	7.39799
ASHGA5P052323	0.00187786	0.0303784	3.0956	down	noncoding	ENST00000513704	CTC-454M9.1	GENCODE	563	chr5	+	88185124	88239160	CTCCCTCTCAAACCGCACCATTGGCACAGACTAATATTTATACAACTTTTTATTTTAAAC	intronic antisense	NM_001131005	MEF2C	myocyte-specific enhancer factor 2C isoform 2	-	88014057	88199922	6.37584	8.00606
ASHGA5P052323	0.00187786	0.0303784	3.0956	down	noncoding	ENST00000513704	CTC-454M9.1	GENCODE	563	chr5	+	88185124	88239160	CTCCCTCTCAAACCGCACCATTGGCACAGACTAATATTTATACAACTTTTTATTTTAAAC	intronic antisense	NM_001193347	MEF2C	myocyte-specific enhancer factor 2C isoform 3	-	88014057	88199922	6.37584	8.00606
ASHGA5P042910	0.00565589	0.0402776	3.09548	down	noncoding	ENST00000434321	AC005019.3	GENCODE	359	chr7	-	13893979	13898650	CCCTTCACCCCTTTTCTTGTTAACATTGCAGTCAAACATTGATTATCATGCACTTTAATA	intergenic							6.42592	8.05608
ASHGA5P056697	0.0217163	0.0700895	3.08437	down	noncoding	TCONS_00007914	XLOC_004186	LincRNAs identified by Cabili et al	701	chr4	-	180087669	180091246	CCCCTAGACCATCACGGACGCCAAGCTTCAGGTAACTCTCACAGTGGAAGAAGGCAGGAA	intergenic							5.84803	7.47301
ASHGA5P044268	0.0303272	0.0855174	3.08254	down	noncoding	ENST00000522918	RP11-628E19.2	GENCODE	590	chr8	-	56429798	56433536	GTCTCTCTGCTTGCCTATTAACTTCCTAAATTAGTGCATTTTCCCCTGTCATTTAAAAAA	intronic antisense	NM_052898	XKR4	XK-related protein 4	+	56015016	56438710	5.67306	7.29718
ASHGA5P042020	0.0235364	0.0731768	3.08136	down	noncoding	ENST00000432121	RP11-624M8.1	GENCODE	524	chr6	-	126041488	126070332	GTCCATTGGTGCTCTCATACTTTTTTCCCTCTCTCTTCCTGTTAGAATGTGCTTCCAGGA	intronic antisense	ENST00000368365	HEY2	hairy/enhancer-of-split related with YRPW motif 2 [Source:HGNC Symbol;Acc:4881]	+	126068809	126082415	5.9265	7.55006
ASHGA5P049899	0.00800663	0.0436085	3.0806	down	noncoding	TCONS_00002569	XLOC_001174	LincRNAs identified by Cabili et al	1030	chr1	-	207096851	207097961	AGACAGAGCATAGAGTGCGCACACACACACTCATAGCCACACACCACGCAGTGACACACA	intergenic							5.87326	7.49647
ASHGA5P050316	0.00215678	0.0314014	3.07893	down	noncoding	TCONS_00015389	XLOC_006972	LincRNAs identified by Cabili et al	267	chr8	-	1236493	1237155	GAAACTAGTTCCCCTCCTAACAGAACCACATACACACACACGCTGAACCAAAACTAGTTC	intergenic							6.61403	8.23646
ASHGA5P020892	0.00963722	0.0463356	3.07851	down	noncoding	ENST00000523682	RP11-267L5.1	GENCODE	836	chr8	+	115294297	115308042	GCCCCCTAGACCATCACGGACGCCGAGCTTCAGGAAACGACGAGGCTGAATCCTGTTGGA	intergenic							6.82484	8.44707
ASHGA5P020509	0.0047371	0.0390427	3.07622	down	noncoding	NR_047513	SLC9B1	RefSeq	1627	chr4	-	103806204	103940896	TATTCTAATAAGAGCTGGGCTTGGACTCGATCCACAGTTTTGTTCTAGGTGCTGTCTCTC	exon sense-overlapping	NM_001100874	SLC9B1	sodium/hydrogen exchanger 9B1 isoform 2	-	103806204	103940896	2.92931	4.55047
ASHGA5P020509	0.0047371	0.0390427	3.07622	down	noncoding	NR_047513	SLC9B1	RefSeq	1627	chr4	-	103806204	103940896	TATTCTAATAAGAGCTGGGCTTGGACTCGATCCACAGTTTTGTTCTAGGTGCTGTCTCTC	exon sense-overlapping	NM_139173	SLC9B1	sodium/hydrogen exchanger 9B1 isoform 1	-	103822084	103940896	2.92931	4.55047
ASHGA5P020509	0.0047371	0.0390427	3.07622	down	noncoding	NR_047513	SLC9B1	RefSeq	1627	chr4	-	103806204	103940896	TATTCTAATAAGAGCTGGGCTTGGACTCGATCCACAGTTTTGTTCTAGGTGCTGTCTCTC	natural antisense	NM_001008388	CISD2	CDGSH iron-sulfur domain-containing protein 2	+	103790134	103813963	2.92931	4.55047
ASHGA5P058274	0.00688904	0.0420131	3.06854	down	noncoding	TCONS_00029073	XLOC_013995	LincRNAs identified by Cabili et al	4150	chr21	-	10196441	10200844	ATGGTAGGGAGGAATTAGGTGTGTTCTTTGTTAAGCAGGTAGTCTTATTTGTGGGATAGT	intergenic							3.77892	5.39647
ASHGA5P049031	0.0409797	0.103612	3.06421	down	noncoding	ENST00000570949	RP11-473M20.7	GENCODE	491	chr16	-	3104916	3107214	TCTCCCCATGCTCACCTCCTGCCTCTTGCTCTGCCCAGTGTGAGGACTCAGCCTGGATCA	natural antisense	NM_022468	MMP25	matrix metalloproteinase-25 preproprotein	+	3096681	3110724	8.65493	10.2704
ASHGA5P058778	0.000693349	0.0225597	3.05495	down	noncoding	uc.58-	uc.58	UCR	203	chr2	-	60297962	60298165	AGCCTGTATCCCCATAATGAATTAAGTAACAGGTTATGCTGATATTAATCTCAGCTAGCT	intergenic							3.84188	5.45303
ASHGA5P029907	0.0170329	0.0608761	3.05433	down	noncoding	ENST00000529696	TMCO5B	GENCODE	1568	chr15	-	33527752	33534491	CATTCTTTCCCTGCTTTCCCTCTGGAATGTCTCTCTTTCAAATAAAGAATATGTTTGACG	intergenic							5.2851	6.89595
ASHGA5P046967	0.0171277	0.0610051	3.04845	down	noncoding	ENST00000477192	RP11-773D16.1	GENCODE	800	chr10	-	81564240	81585538	GGCTGTGGGTTGTGCCCTTCACTCCTTGCCCTCCTCCATTCCCTGTCCTGATCTGAACTC	intergenic							10.3757	11.9838
ASHGA5P028831	0.00393213	0.0377018	3.04635	down	noncoding	ENST00000413926	LINC00372	GENCODE	606	chr13	+	51657936	51659535	AAAGAGCTCTGCATCCCACTCCATATCTTCTCCTGAGAAGTTGAAAAGGATCTGTCTGGA	intergenic							7.37019	8.97727
ASHGA5P053566	0.0375939	0.0982578	3.04222	down	noncoding	NR_046360	FAM49B	RefSeq	4101	chr8	-	130851838	131028897	AACAGCGCTTCCTCTTCCTCCTCGCCGCGCCTCTTCCTTTTATAGTTATTTCTCGCCTGG	exon sense-overlapping	NM_001256763	FAM49B	protein FAM49B	-	130851838	130952118	8.74346	10.3486
ASHGA5P053566	0.0375939	0.0982578	3.04222	down	noncoding	NR_046360	FAM49B	RefSeq	4101	chr8	-	130851838	131028897	AACAGCGCTTCCTCTTCCTCCTCGCCGCGCCTCTTCCTTTTATAGTTATTTCTCGCCTGG	exon sense-overlapping	NM_016623	FAM49B	protein FAM49B	-	130851838	130952118	8.74346	10.3486
ASHGA5P053065	7.05045e-05	0.0112092	3.03491	down	noncoding	uc011kbl.2	FLJ35390	UCSC_knowngene	2147	chr7	+	44079066	44082082	GCTCACCGTCCTTCTCCTCGATGTCCACGAGCTTGGTGATGAAGTCCTTCAGCTGCGCCA	intergenic							5.74665	7.3483
ASHGA5P056460	0.00185129	0.0301717	3.03254	down	noncoding	TCONS_00004440	XLOC_002313	LincRNAs identified by Cabili et al	252	chr2	-	128456822	128458363	TGTGGTTCCTCTCACAGCCCTTCAACCAGGCCTTCGTTCCACCGTGCCAGCAAAATTGTT	intergenic							5.57883	7.17935
ASHGA5P054396	2.85931e-05	0.00861233	3.03151	down	noncoding	NR_026794	LOC731789	RefSeq	6118	chr10	+	26932036	26942383	AGTGCCTTCAGTGGGTGCTTTCAGTTGGTGGCATTCGGTTGCCTTTCCTGAGGAGAGGTG	intergenic							3.32315	4.92319
ASHGA5P055007	0.0327713	0.0896339	3.03117	down	noncoding	TCONS_00009904	XLOC_004316	LincRNAs identified by Cabili et al	1445	chr5	+	24292126	24322125	TGCCCTCCCTCTTTTGGTAAGCAAAACACTGATGCTTATGACATCTTCCTTTTCTTTGGT	intergenic							7.62915	9.22903
ASHGA5P000373	0.00944361	0.0460251	3.02714	down	noncoding	chr2:90959050-90986900-	chr2:90959050-90986900	LincRNAs identified by Khalil et al	27850	chr2	-	91595323	91623173	TAACATTGGGAGAAATAGCCAGCTGAATCTGTAACTCAACAGAAACAAGTGATCCATATA	intergenic							3.61482	5.21278
ASHGA5P007631	0.022038	0.0707445	3.02383	down	noncoding	ENST00000335223	RP11-56D16.2	GENCODE	759	chr9	-	130455256	130477926	AAATTGCTGCTCTGTTTTCTTAACTGGCTTGGCTTGGACTCATCGTCAACAGCAGCAGCA	exon sense-overlapping	NM_001002913	PTRH1	probable peptidyl-tRNA hydrolase	-	130476226	130477936	5.17506	6.77144
ASHGA5P007631	0.022038	0.0707445	3.02383	down	noncoding	ENST00000335223	RP11-56D16.2	GENCODE	759	chr9	-	130455256	130477926	AAATTGCTGCTCTGTTTTCTTAACTGGCTTGGCTTGGACTCATCGTCAACAGCAGCAGCA	intronic antisense	NM_001012502	C9orf117	uncharacterized protein C9orf117	+	130469270	130476303	5.17506	6.77144
ASHGA5P031119	0.000927873	0.0253095	3.02381	down	noncoding	uc010vfz.1	X69637	UCSC_knowngene	1312	chr16	-	33110461	33120784	AGACTTCTATAGTATAATTGCCCGTCTTAGCCCTGCTTTTGGCGCAGCACAGAAGTTTTG	intergenic							4.4855	6.08187
ASHGA5P015107	0.00498673	0.0392352	3.01442	down	noncoding	NR_027438	IP6K2	RefSeq	1385	chr3	-	48730883	48754711	GGGTAATTAGGACAAAGCCAAAGGCCCCTTGTTAGCTGGCCATCCCTGCCCCATTTTTTC	exon sense-overlapping	NM_001005909	IP6K2	inositol hexakisphosphate kinase 2 isoform a	-	48725435	48754711	7.20218	8.79406
ASHGA5P015107	0.00498673	0.0392352	3.01442	down	noncoding	NR_027438	IP6K2	RefSeq	1385	chr3	-	48730883	48754711	GGGTAATTAGGACAAAGCCAAAGGCCCCTTGTTAGCTGGCCATCCCTGCCCCATTTTTTC	exon sense-overlapping	NM_001005910	IP6K2	inositol hexakisphosphate kinase 2 isoform b	-	48730883	48754711	7.20218	8.79406
ASHGA5P015107	0.00498673	0.0392352	3.01442	down	noncoding	NR_027438	IP6K2	RefSeq	1385	chr3	-	48730883	48754711	GGGTAATTAGGACAAAGCCAAAGGCCCCTTGTTAGCTGGCCATCCCTGCCCCATTTTTTC	exon sense-overlapping	NM_001005911	IP6K2	inositol hexakisphosphate kinase 2 isoform b	-	48730883	48754711	7.20218	8.79406
ASHGA5P015107	0.00498673	0.0392352	3.01442	down	noncoding	NR_027438	IP6K2	RefSeq	1385	chr3	-	48730883	48754711	GGGTAATTAGGACAAAGCCAAAGGCCCCTTGTTAGCTGGCCATCCCTGCCCCATTTTTTC	exon sense-overlapping	NM_001146178	IP6K2	inositol hexakisphosphate kinase 2 isoform c	-	48730883	48754711	7.20218	8.79406
ASHGA5P015107	0.00498673	0.0392352	3.01442	down	noncoding	NR_027438	IP6K2	RefSeq	1385	chr3	-	48730883	48754711	GGGTAATTAGGACAAAGCCAAAGGCCCCTTGTTAGCTGGCCATCCCTGCCCCATTTTTTC	exon sense-overlapping	NM_001146179	IP6K2	inositol hexakisphosphate kinase 2 isoform c	-	48730883	48754711	7.20218	8.79406
ASHGA5P015107	0.00498673	0.0392352	3.01442	down	noncoding	NR_027438	IP6K2	RefSeq	1385	chr3	-	48730883	48754711	GGGTAATTAGGACAAAGCCAAAGGCCCCTTGTTAGCTGGCCATCCCTGCCCCATTTTTTC	exon sense-overlapping	NM_001190316	IP6K2	inositol hexakisphosphate kinase 2 isoform d	-	48730883	48754711	7.20218	8.79406
ASHGA5P015107	0.00498673	0.0392352	3.01442	down	noncoding	NR_027438	IP6K2	RefSeq	1385	chr3	-	48730883	48754711	GGGTAATTAGGACAAAGCCAAAGGCCCCTTGTTAGCTGGCCATCCCTGCCCCATTTTTTC	exon sense-overlapping	NM_001190317	IP6K2	inositol hexakisphosphate kinase 2 isoform e	-	48730883	48754711	7.20218	8.79406
ASHGA5P015107	0.00498673	0.0392352	3.01442	down	noncoding	NR_027438	IP6K2	RefSeq	1385	chr3	-	48730883	48754711	GGGTAATTAGGACAAAGCCAAAGGCCCCTTGTTAGCTGGCCATCCCTGCCCCATTTTTTC	exon sense-overlapping	NM_016291	IP6K2	inositol hexakisphosphate kinase 2 isoform a	-	48725435	48754711	7.20218	8.79406
ASHGA5P047083	0.0102689	0.0473891	3.01266	down	noncoding	ENST00000445600	RP11-547D24.3	GENCODE	320	chr1	-	1980641	1981090	CTGTCTACCTCTCCTGCCACCACCCACTCACACGTTTTAAATACAAGCCGTCGGTTCTCA	bidirectional	NM_002744	PRKCZ	protein kinase C zeta type isoform 1	+	1981908	2116834	7.75816	9.34919
ASHGA5P031793	0.00325143	0.0360585	3.01174	down	noncoding	ENST00000573705	CES1P1	GENCODE	1044	chr16	+	55794512	55807833	AGTGATGGTGTCTTGTGTCTCTCAGGGTCTGAGTTCTGTGGACCCACTTGTGGGCTGTGG	intergenic							3.22392	4.81451
ASHGA5P040887	0.00324073	0.0360585	3.01153	down	noncoding	ENST00000522571	CTB-43E15.4	GENCODE	557	chr5	-	173217461	173234884	CCAAACGGCCTTCACCTTCCCCTAAATGATGTTTCAAATGACAAAATAAGGGGACAAGGA	intergenic							9.25174	10.8422
ASHGA5P023711	0.00145364	0.0282283	3.0066	down	noncoding	HMlincRNA158-	HMlincRNA158	LincRNAs identified by Khalil et al	4836	chr6	-	112269457	112274293	CAAGAGCAGAGACAAGCCACTCCCAACATTTCACTTGCCCCATCTGTAAAACAACTTCAA	intergenic							5.73962	7.32776
ASHGA5P014830	0.0343768	0.0926053	3.00598	down	noncoding	ENST00000413794	RP11-114G22.1	GENCODE	565	chr12	+	22852792	23040977	CTTCTCTATTGTTGCCCTTCATCACTCAGCAGTGAAGAATGAAAATCAACAGAGCTTTCC	intergenic							7.2377	8.82553
ASHGA5P055241	0.00298095	0.0353331	2.99913	down	noncoding	ENST00000537295	RP11-598F7.6	GENCODE	1063	chr12	-	276021	291562	GAAAAAAATAAACAGAACCTCTTCTCTCACTCTCCAGTGGAAAGTATAGAATCAAACGTA	intronic antisense	NM_001170738	IQSEC3	IQ motif and SEC7 domain-containing protein 3 isoform 1	+	176048	287625	4.00162	5.58617
ASHGA5P055241	0.00298095	0.0353331	2.99913	down	noncoding	ENST00000537295	RP11-598F7.6	GENCODE	1063	chr12	-	276021	291562	GAAAAAAATAAACAGAACCTCTTCTCTCACTCTCCAGTGGAAAGTATAGAATCAAACGTA	intronic antisense	NM_015232	IQSEC3	IQ motif and SEC7 domain-containing protein 3 isoform 2	+	186541	280494	4.00162	5.58617
ASHGA5P026800	0.00816483	0.0438996	2.99318	down	noncoding	ENST00000424313	AP000997.1	GENCODE	479	chr11	+	115498782	115500461	GCTTCCCTTGCTCCTGAACTTGAGCCTCTGATTCCCTCTCCTGTTGGAGGCTTTAACACG	intergenic							8.69388	10.2756
ASHGA5P041596	0.040116	0.102546	2.99139	down	noncoding	ENST00000514793	RP11-1379J22.5	GENCODE	485	chr5	+	179085236	179091433	CCTTTCCCTTCTCAGGACATACACAGGACTGGGAGAAAATAGACTAAGTATTTGATATTA	intergenic							4.84204	6.42286
ASHGA5P040107	0.0100018	0.0469628	2.98913	down	noncoding	ENST00000412092	AL583842.3	GENCODE	594	chr1	+	142618794	142621532	GTGTTGTACAGTGGAAACGGTCATCTTCCGCTAAAGCACAGTGTGTTTTGCAGTGGAAAT	intergenic							3.39049	4.97021
ASHGA5P055879	8.58996e-05	0.0117378	2.98879	down	noncoding	ENST00000552070	RP11-244H18.2	GENCODE	576	chr14	+	20071161	20073466	TTTACACACACCTGCTAAGCCAGGCCTGGGACCCACAGCTCCATCATGTGAGCTGTACAC	intergenic							3.26541	4.84497
ASHGA5P044437	0.0118327	0.0503273	2.98589	down	noncoding	TCONS_00018874	XLOC_008701	LincRNAs identified by Cabili et al	414	chr10	-	4264062	4283144	TTTTCTTTTTTGGCTGACTGCTTGAAACACATGTAGCCCCAGGAAACAAGTAGAGCCACC	intergenic							4.42433	6.00249
ASHGA5P028278	0.0141154	0.0547803	2.98117	down	noncoding	ENST00000553177	RP1-46F2.2	GENCODE	524	chr12	+	111374388	111396012	ACTCCCTCATCCATTCTTCCTGGCAGACTATTCAGTTGTGCTTTTTAAGATTTATTCTGT	intergenic							5.31248	6.88836
ASHGA5P020985	0.0319291	0.0880965	2.97169	down	noncoding	ENST00000523336	RP11-317N12.1	GENCODE	784	chr8	+	33865374	33896526	TGAGAAGAATGAGCTGGCTGGGTTGGACATTCAGAGGTGACAATGGCCAGATCAACCTTG	intergenic							3.95089	5.52217
ASHGA5P031664	0.00757874	0.0431256	2.97054	down	noncoding	ENST00000569752	AC002310.12	GENCODE	752	chr16	+	30546431	30547520	AGACCTCCTTCTCACACTTCCTGATGGCCTACTCTGTGCTCCACGTGACTTCATACATGT	intronic antisense	ENST00000568114	AC002310.13	Uncharacterized protein [Source:UniProtKB/TrEMBL;Acc:H3BQ85]	-	30545547	30569600	6.03362	7.60434
ASHGA5P031664	0.00757874	0.0431256	2.97054	down	noncoding	ENST00000569752	AC002310.12	GENCODE	752	chr16	+	30546431	30547520	AGACCTCCTTCTCACACTTCCTGATGGCCTACTCTGTGCTCCACGTGACTTCATACATGT	natural antisense	ENST00000252799	ZNF747	zinc finger protein 747 [Source:HGNC Symbol;Acc:28350]	-	30541687	30546668	6.03362	7.60434
ASHGA5P030797	0.000556949	0.0204607	2.96856	down	noncoding	ENST00000528696	CTD-3076O17.1	GENCODE	572	chr15	+	100510419	100514215	TTTACACTCCACGCACGAGACTTCCAAGGCAACACCTAGGATTTAGAGACTATGTTCTCA	natural antisense	NM_139057	ADAMTS17	A disintegrin and metalloproteinase with thrombospondin motifs 17 preproprotein	-	100511642	100882183	5.29365	6.86341
ASHGA5P035846	0.00437079	0.0384788	2.96719	down	noncoding	ENST00000421759	AC073283.7	GENCODE	860	chr2	+	47294960	47298343	AGGAGCGTCTTGGCTCTGTGACCTCTGATGAGATGATTTTATTGTGAGCTTTCTGTTCAC	intron sense-overlapping	NM_020458	TTC7A	tetratricopeptide repeat protein 7A	+	47168312	47303275	6.20061	7.7697
ASHGA5P040698	0.00621734	0.0409695	2.96646	down	noncoding	ENST00000555344	CTC-349C3.2	GENCODE	489	chr5	-	134582735	134583505	TAAATCAGCATGAGTCACTCCCTTGCCTTCCTCACAAGCATGAATCACGAATCATCAAAA	intronic antisense	ENST00000432382	CTC-203F4.1	HCG2045138; Uncharacterized protein [Source:UniProtKB/TrEMBL;Acc:G3V3D3]	+	134368969	134680375	6.30825	7.87699
ASHGA5P032779	0.00196543	0.0309043	2.964	down	noncoding	ENST00000574260	RP5-1050D4.5	GENCODE	551	chr17	+	4891000	4891741	AGACAACTCGGGCTCCACTTGCTTGCTTTTTAATAACAGAGCAGAGAGAATACAAGGCCA	natural antisense	NM_001167985	INCA1	protein INCA1 isoform 2	-	4891424	4900905	3.49732	5.06486
ASHGA5P032779	0.00196543	0.0309043	2.964	down	noncoding	ENST00000574260	RP5-1050D4.5	GENCODE	551	chr17	+	4891000	4891741	AGACAACTCGGGCTCCACTTGCTTGCTTTTTAATAACAGAGCAGAGAGAATACAAGGCCA	natural antisense	NM_001167986	INCA1	protein INCA1 isoform 1	-	4891424	4900905	3.49732	5.06486
ASHGA5P032779	0.00196543	0.0309043	2.964	down	noncoding	ENST00000574260	RP5-1050D4.5	GENCODE	551	chr17	+	4891000	4891741	AGACAACTCGGGCTCCACTTGCTTGCTTTTTAATAACAGAGCAGAGAGAATACAAGGCCA	natural antisense	NM_001167987	INCA1	protein INCA1 isoform 1	-	4891424	4900905	3.49732	5.06486
ASHGA5P032779	0.00196543	0.0309043	2.964	down	noncoding	ENST00000574260	RP5-1050D4.5	GENCODE	551	chr17	+	4891000	4891741	AGACAACTCGGGCTCCACTTGCTTGCTTTTTAATAACAGAGCAGAGAGAATACAAGGCCA	natural antisense	NM_213726	INCA1	protein INCA1 isoform 2	-	4891424	4900905	3.49732	5.06486
ASHGA5P056311	0.0169109	0.0605576	2.96179	down	noncoding	TCONS_00002218	XLOC_000529	LincRNAs identified by Cabili et al	2298	chr1	+	203343729	203369257	TGCCCTTCAACATCACCGAGAACTACTGCCATCAGCTATATAATGAAACTATTTTTAAGC	intergenic							5.32591	6.89238
ASHGA5P027744	0.0249645	0.0759479	2.96146	down	noncoding	TCONS_00012771	XLOC_005807	LincRNAs identified by Cabili et al	416	chr6	-	112697489	112717623	AATGATCAAGAACATCCCACACACAACACCGGGCAATGATACATCTTCATGTATTTCCTG	intergenic							4.26147	5.82778
ASHGA5P015159	0.00291915	0.0350032	2.96131	down	noncoding	ENST00000417384	RP11-30O15.1	GENCODE	589	chr3	+	187514042	187522925	GAGAACAAAGGCATCCATCCCAAAGATTTCCCAAAGATGTCCTCAGTAACCAAAGTGATT	intergenic							3.70509	5.27133
ASHGA5P053745	0.000461494	0.0187433	2.96079	down	noncoding	ENST00000439438	RP11-305L7.6	GENCODE	454	chr9	+	93881343	93945044	AATACACCCAGCCCACACCCTGACTTTACAACCTTTAATTAATTAGAGGAAAGAAAGAGA	intergenic							7.47274	9.03872
ASHGA5P057352	0.00759646	0.0431276	2.95846	down	noncoding	TCONS_00016268	XLOC_007644	LincRNAs identified by Cabili et al	1944	chr9	-	11097566	11109984	ATCTTCATGTGGCTGGCCTGGTACTTCAGAATAGTAGAACAAGGAGTCTGTTGCTTTAAC	intergenic							3.75642	5.32126
ASHGA5P018197	0.0317361	0.0878016	2.95536	down	noncoding	ENST00000450527	RP11-342D14.1	GENCODE	722	chrX	+	45042495	45193162	CAATTAACAGGTGTGAGCCACTGCACCCAGCCTAAAGAGAATATTTTCTCAATTAAAAAT	intronic antisense	NM_024689	CXorf36	deleted in autism-related protein 1 isoform 2 precursor	-	45021554	45060146	8.45173	10.0151
ASHGA5P018197	0.0317361	0.0878016	2.95536	down	noncoding	ENST00000450527	RP11-342D14.1	GENCODE	722	chrX	+	45042495	45193162	CAATTAACAGGTGTGAGCCACTGCACCCAGCCTAAAGAGAATATTTTCTCAATTAAAAAT	intronic antisense	NM_176819	CXorf36	deleted in autism-related protein 1 isoform 1 precursor	-	45007617	45060146	8.45173	10.0151
ASHGA5P023914	0.0436147	0.107878	2.94619	down	noncoding	HMlincRNA933+	HMlincRNA933	LincRNAs identified by Khalil et al	21349	chr20	+	48363997	48385346	GGTTTCTCTTTTTCATCTCACTGCTCTGTCTCTGATGTGGCTTCATTCTCAGAGGATTGT	intergenic							5.68039	7.23924
ASHGA5P000282	0.00193359	0.0307408	2.93972	down	noncoding	chr14:84031800-84050525+	chr14:84031800-84050525	LincRNAs identified by Khalil et al	18725	chr14	+	84962047	84980772	GAAATTATTCTTACCACGACCCTTACCTTGCTTGCTTTTGCCTCTTATGACTTTGACCAT	intergenic							4.52609	6.08177
ASHGA5P035242	0.000359382	0.0167367	2.93712	down	noncoding	TCONS_00016565	XLOC_007326	LincRNAs identified by Cabili et al	1451	chr9	+	33730334	33749410	TTCTTTTAATAGTGTGCACAGGGTTGACGGGAAACACACACACACTGTGCAGAACCATTC	intergenic							4.45898	6.01338
ASHGA5P038168	0.00107321	0.0258808	2.93411	down	noncoding	ENST00000430620	AC093415.2	GENCODE	463	chr3	-	37860223	37903211	TCACAGGGCTGGGGAGGCTTGGAGGACCCCTCGGATTAGAGAAAACACTGGCAAGAAAAA	natural antisense	NM_002207	ITGA9	integrin alpha-9 precursor	+	37493812	37861281	5.14457	6.69749
ASHGA5P022022	0.00738435	0.0427228	2.92906	down	noncoding	uc001vvw.2	P775P	UCSC_knowngene	1990	chr14	-	19935900	19970058	GAATTTATGGGTAACCACTGATCCACTTCCAGTCACTATCCATGAGTTTTTATTTCCAAA	intergenic							3.0159	4.56634
ASHGA5P031633	3.64256e-05	0.00861233	2.92842	down	noncoding	ENST00000569881	AC002551.1	GENCODE	592	chr16	+	27654519	27655984	AATTTCCTCCTGCATCATTTTTCTTTTAGTCACTTGTCCTTCTCTGAGCCCTTCTTTGCT	intron sense-overlapping	NM_015202	KIAA0556	uncharacterized protein KIAA0556	+	27561467	27791692	8.67909	10.2292
ASHGA5P037148	0.00117588	0.0266408	2.92755	down	noncoding	TCONS_00025743	XLOC_012560	LincRNAs identified by Cabili et al	432	chr17	-	67353283	67355360	TCTATGAATCCATGAATGTGGGCTGGCTCTGCGAACACTGCTGTGAAGGCTACATTTTTT	intergenic							3.28499	4.83469
ASHGA5P030356	0.0302177	0.0853929	2.92609	down	noncoding	ENST00000566797	RP11-580I1.3	GENCODE	849	chr15	+	24686273	24693114	TCTATCTTCCTTCTCCATGGGATCTTTGAGCCATAATTTATAAAATCACCTCTACATCTC	intergenic							3.50195	5.05092
ASHGA5P000003	0.00453071	0.0386604	2.92605	down	noncoding	AA601302		LincRNAs identified by Khalil et al	625	chr21	-	11127021	11127438	CCAGAAGCTCCAGCATGGTCCACCTACCAGAAGCTCCAGCATGATTTACCCATGAGTAGC	intergenic							4.22985	5.77881
ASHGA5P033224	0.00933216	0.0457225	2.92489	down	noncoding	NR_038458	LOC400604	RefSeq	1420	chr17	+	48944039	48945732	TTTATTTGTTTGTTTTTGGTTTTCTGTAATGACAAGTCCATCTGTAATAAAAGTGAGTTA	natural antisense	NM_001243877	TOB1	protein Tob1 isoform 1	-	48939586	48945339	4.52332	6.0717
ASHGA5P053216	0.00432937	0.0383944	2.91935	down	noncoding	ENST00000426709	RP11-277B15.2	GENCODE	971	chr1	-	167145153	167165026	TATTAAGTTGTAAGATCTATAAAAGCTTTCATCACCTCACTTCCCTACTGGCCTTTACTC	intergenic							5.23572	6.78137
ASHGA5P051124	0.000969385	0.0255391	2.91451	down	noncoding	ENST00000443008	RP5-1028L10.1	GENCODE	797	chr1	-	110709428	110715111	GTCAGCTCCTTCTCATTCAGGGACCTAGGAAACCAGGTGAGCAGTAAAGGATTATCTGAC	natural antisense	NM_001010898	SLC6A17	sodium-dependent neutral amino acid transporter SLC6A17	+	110693131	110744823	3.10212	4.64538
ASHGA5P025918	0.0169067	0.0605576	2.91112	down	noncoding	NR_046318	ENC1	RefSeq	3705	chr5	-	73923230	73937249	AGTCGCCACTGCTCTCACTCCATCACTCGATGAGATAATATGAGATTTCTACTTCGGAGA	exon sense-overlapping	NM_001256574	ENC1	ectoderm-neural cortex protein 1 isoform 1	-	73923230	73937249	6.55982	8.10139
ASHGA5P025918	0.0169067	0.0605576	2.91112	down	noncoding	NR_046318	ENC1	RefSeq	3705	chr5	-	73923230	73937249	AGTCGCCACTGCTCTCACTCCATCACTCGATGAGATAATATGAGATTTCTACTTCGGAGA	exon sense-overlapping	NM_001256575	ENC1	ectoderm-neural cortex protein 1 isoform 1	-	73923230	73937249	6.55982	8.10139
ASHGA5P025918	0.0169067	0.0605576	2.91112	down	noncoding	NR_046318	ENC1	RefSeq	3705	chr5	-	73923230	73937249	AGTCGCCACTGCTCTCACTCCATCACTCGATGAGATAATATGAGATTTCTACTTCGGAGA	exon sense-overlapping	NM_001256576	ENC1	ectoderm-neural cortex protein 1 isoform 2	-	73923230	73937249	6.55982	8.10139
ASHGA5P025918	0.0169067	0.0605576	2.91112	down	noncoding	NR_046318	ENC1	RefSeq	3705	chr5	-	73923230	73937249	AGTCGCCACTGCTCTCACTCCATCACTCGATGAGATAATATGAGATTTCTACTTCGGAGA	exon sense-overlapping	NM_003633	ENC1	ectoderm-neural cortex protein 1 isoform 1	-	73923230	73937249	6.55982	8.10139
ASHGA5P029323	0.0102845	0.0473891	2.90885	down	noncoding	TCONS_00010236	XLOC_004700	LincRNAs identified by Cabili et al	1974	chr5	-	1043115	1045405	ACACTAACCCACCCACTTATTCACACACTCATTCACACAACCCAACTTATTCACACACTA	intergenic							7.42175	8.9622
ASHGA5P044378	0.0236	0.0733454	2.90052	down	noncoding	ENST00000440763	AF121898.3	GENCODE	709	chr8	-	88554213	88767923	TATATGTTATGGATAGTTTGTATGTATGTGTGTGGTGGGGATGGTATGAATGCATGTGCT	intronic antisense	ENST00000521593	CNBD1	cyclic nucleotide binding domain containing 1 [Source:HGNC Symbol;Acc:26663]	+	88363960	88627447	4.09835	5.63466
ASHGA5P030094	0.00708485	0.0423118	2.89828	down	noncoding	ENST00000432858	RP11-243J18.2	GENCODE	157	chr1	-	155679888	155680354	TTTTATTTTTTATTCTATTTTAGATGCTAAAGCTGTAAATTGGCAACTTGTTTTTCTTTT	intronic antisense	NM_001199849	DAP3	28S ribosomal protein S29, mitochondrial isoform 1	+	155658881	155708800	3.25066	4.78585
ASHGA5P030094	0.00708485	0.0423118	2.89828	down	noncoding	ENST00000432858	RP11-243J18.2	GENCODE	157	chr1	-	155679888	155680354	TTTTATTTTTTATTCTATTTTAGATGCTAAAGCTGTAAATTGGCAACTTGTTTTTCTTTT	intronic antisense	NM_001199850	DAP3	28S ribosomal protein S29, mitochondrial isoform 2	+	155658881	155708800	3.25066	4.78585
ASHGA5P030094	0.00708485	0.0423118	2.89828	down	noncoding	ENST00000432858	RP11-243J18.2	GENCODE	157	chr1	-	155679888	155680354	TTTTATTTTTTATTCTATTTTAGATGCTAAAGCTGTAAATTGGCAACTTGTTTTTCTTTT	intronic antisense	NM_001199851	DAP3	28S ribosomal protein S29, mitochondrial isoform 3	+	155658881	155708800	3.25066	4.78585
ASHGA5P030094	0.00708485	0.0423118	2.89828	down	noncoding	ENST00000432858	RP11-243J18.2	GENCODE	157	chr1	-	155679888	155680354	TTTTATTTTTTATTCTATTTTAGATGCTAAAGCTGTAAATTGGCAACTTGTTTTTCTTTT	intronic antisense	NM_004632	DAP3	28S ribosomal protein S29, mitochondrial isoform 1	+	155658884	155708800	3.25066	4.78585
ASHGA5P030094	0.00708485	0.0423118	2.89828	down	noncoding	ENST00000432858	RP11-243J18.2	GENCODE	157	chr1	-	155679888	155680354	TTTTATTTTTTATTCTATTTTAGATGCTAAAGCTGTAAATTGGCAACTTGTTTTTCTTTT	intronic antisense	NM_033657	DAP3	28S ribosomal protein S29, mitochondrial isoform 1	+	155658884	155708800	3.25066	4.78585
ASHGA5P028550	0.0096934	0.0463839	2.89806	down	noncoding	ENST00000437515	AL358175.1	GENCODE	2504	chr1	-	121102016	121139765	CAGGGTCCCTAACGTACTGGACAGAGCTAGGAAAGCAAACCCATTTGCTTCTTCCTGCAG	intergenic							3.21334	4.74843
ASHGA5P037761	0.00330199	0.0361534	2.89748	down	noncoding	ENST00000414483	LL22NC03-121E8.4	GENCODE	498	chr22	-	48535277	48536818	CATCTTCCTCAGACTCCAGCAGGCCCTCCACTCCTAGCACACAGGCCGGATTGAATCTTC	intergenic							7.73745	9.27225
ASHGA5P023399	0.0024239	0.0329571	2.89682	down	noncoding	ENST00000580190	RP11-848P1.9	GENCODE	522	chr17	+	29335622	29372567	TTAGAAGACGAGCTATCAGCTTCCCAGTTTGCACAATTCATCAAGAAATAATGCAGGGCC	intergenic							4.45191	5.98638
ASHGA5P000086	0.0137444	0.0542048	2.89235	down	noncoding	AY203949R		LincRNAs identified by Khalil et al	1269	chr3	+	129080559	129082577	CCCACCTCCCTCCCGGACGGGGTGGCTGCAGGCGGAGGGGCTCCTCACTTCTCTGACGTG	intergenic							7.80032	9.33256
ASHGA5P057016	0.00288018	0.034899	2.89227	down	noncoding	TCONS_00011965	XLOC_005477	LincRNAs identified by Cabili et al	285	chr6	+	137764900	137772197	GTGTGGCTGGCACTTTAAAGAAGTCTTTCCTTTGTCTTACGGCTTCCAGAATTCCTGATG	intergenic							5.65716	7.18936
ASHGA5P035544	0.00239416	0.0327826	2.8884	down	noncoding	TCONS_00004303	XLOC_002153	LincRNAs identified by Cabili et al	272	chr2	-	71063564	71088005	TCTCCTGGCTTGGCCTCTGGGACTGGTTTAGGAGGAGGATTTGCAAGTAAGGAGGAGAGC	intergenic							3.27601	4.80628
ASHGA5P046167	0.00570256	0.0402776	2.88608	down	noncoding	ENST00000422410	RP11-344N17.8	GENCODE	270	chrX	-	48193109	48193874	GTGGCCCTTAGGCTTGGGATCTTAGTTCAAAATCATTGTACAAACTAAATTTATTCTACT	intergenic							2.82628	4.3554
ASHGA5P043298	0.00815259	0.0438857	2.88485	down	noncoding	ENST00000456270	AC000111.6	GENCODE	376	chr7	-	117244844	117287469	CATACTGGAATGGAATTAAAGACCGAACTACAGAAGCTAAAGAGAGCTGATCAAACTAAA	intronic antisense	NM_000492	CFTR	cystic fibrosis transmembrane conductance regulator	+	117120016	117308718	3.15042	4.67892
ASHGA5P016589	0.0468104	0.112699	2.88294	down	noncoding	ENST00000431997	RP1-288M22.2	GENCODE	454	chr6	+	72160536	72168577	CTTAAAATAAGGTGCTAGGAATCACTCCACTCTGAAGGATTCCCTTGTCTTCATGGCCCA	intergenic							5.74342	7.27096
ASHGA5P022356	0.00423105	0.038212	2.88209	down	noncoding	ENST00000555146	RP11-110A12.2	GENCODE	532	chr12	-	55828520	55873256	CGCGACCCCGTCTGGGAGTTGTTCATGTATTCTAGAGGAAAAGAAAGGAATATCATTATA	intron sense-overlapping	NM_001005499	OR6C70	olfactory receptor 6C70	-	55862983	55863922	4.81702	6.34414
ASHGA5P022356	0.00423105	0.038212	2.88209	down	noncoding	ENST00000555146	RP11-110A12.2	GENCODE	532	chr12	-	55828520	55873256	CGCGACCCCGTCTGGGAGTTGTTCATGTATTCTAGAGGAAAAGAAAGGAATATCATTATA	intronic antisense	NM_054105	OR6C2	olfactory receptor 6C2	+	55845997	55846936	4.81702	6.34414
ASHGA5P051474	0.00656753	0.0414551	2.88049	down	noncoding	ENST00000452738	BX571672.2	GENCODE	661	chr1	-	143193888	143195886	CTTGACTGAGGTTAGTTATATGACCGTTTCTCTTTAGGGTTTCATTTCTCTAGCGTAATT	intergenic							3.63716	5.16348
ASHGA5P031839	0.000866792	0.0244425	2.8802	down	noncoding	ENST00000563811	RP11-351A20.1	GENCODE	428	chr16	+	65614570	65680850	ACTACAAGAACCAGCCAACCCGCAGAATTACAAGAACAATAAAAGGTTGTTTTCTTAAGC	intergenic							4.15913	5.6853
ASHGA5P041351	0.0214036	0.0695428	2.87977	down	noncoding	ENST00000511631	RP11-395P13.4	GENCODE	606	chr5	+	124712526	124713132	TGAGTTTCTGGCTGTCTCTGAGGAATAGTTCCATTAACTAAGTCTGAATGATTACTTGTA	intergenic							3.01833	4.54428
ASHGA5P037294	0.0254044	0.0765285	2.87799	down	noncoding	NR_026812	RUNX1-IT1	RefSeq	1502	chr21	-	36410232	36411723	CCATGTTGAAGTGTAAACTCCACTCAGCTCCAGGAGGAATCGTGTTTTCTTTATCACCAG	intron sense-overlapping	NM_001754	RUNX1	runt-related transcription factor 1 isoform AML1c	-	36160097	36421595	5.14124	6.66631
ASHGA5P049198	5.14746e-06	0.00758285	2.87551	down	noncoding	TCONS_00023943	XLOC_011259	LincRNAs identified by Cabili et al	346	chr15	+	53375035	53393040	TTCTTGCCCTGGGTCATCCTGCACTCAGTGTTGACTTTGTGGCATCTACTGAAATACTTT	intergenic							3.61431	5.13813
ASHGA5P027717	0.000211238	0.0142595	2.86822	down	noncoding	ENST00000443154	RP11-386I8.6	GENCODE	1151	chr12	-	133609244	133613808	CCAGCCACTCCCTAGACACAATTTTAAATTGTCAGATATACCTTTAGTAAAGCTGAAAAA	bidirectional	NM_001127372	ZNF84	zinc finger protein 84	+	133613979	133639885	5.61385	7.134
ASHGA5P027717	0.000211238	0.0142595	2.86822	down	noncoding	ENST00000443154	RP11-386I8.6	GENCODE	1151	chr12	-	133609244	133613808	CCAGCCACTCCCTAGACACAATTTTAAATTGTCAGATATACCTTTAGTAAAGCTGAAAAA	bidirectional	NM_003428	ZNF84	zinc finger protein 84	+	133613877	133639885	5.61385	7.134
ASHGA5P046879	0.0223287	0.0712185	2.86629	down	noncoding	TCONS_00017163	XLOC_007974	LincRNAs identified by Cabili et al	237	chrX	+	47531908	47544867	ACTAATAAATTTTGTTTGATGCTCTCTCTCCATACTACAATGCCTGGACCGAGGTTAGTG	intergenic							4.37203	5.89121
ASHGA5P031791	0.00772445	0.0433457	2.86429	down	noncoding	ENST00000576365	RP11-212I21.4	GENCODE	3828	chr16	+	55572111	55575939	CACACACACCCTACATATATACTTGTTCTAACAAAGCTAATTTCTTCTGGAACTTGGTAA	intron sense-overlapping	NM_017839	LPCAT2	lysophosphatidylcholine acyltransferase 2	+	55542912	55620582	5.49162	7.0098
ASHGA5P036572	0.0357505	0.0950837	2.85633	down	noncoding	ENST00000446029	AC079612.2	GENCODE	348	chr2	+	240547391	240552533	TTTAGAAATGTCAGCAGGAGAGACCCACTTCCCTTTTAACCCATGGAGTCAGGAGGAGAG	intergenic							6.66785	8.18201
ASHGA5P034760	0.00632454	0.0410595	2.85414	down	noncoding	ENST00000422045	AC008440.10	GENCODE	555	chr19	+	54368016	54369394	GAGTCATCATCTTTGGGGTCGGGGTGCTGTTACAGGATGGGTAACCACTCTGAACCAGGG	intergenic							5.1243	6.63736
ASHGA5P054175	0.0292174	0.0834352	2.8485	down	noncoding	ENST00000519624	RP11-459E5.1	GENCODE	292	chr8	+	22602130	22603250	TTTGTCCTTCTGCCTCTCCTCTGCCTGAGAGCAAGGTGAGAGGATCCCGTTCCTGTTCTC	intronic antisense	NM_144962	PEBP4	phosphatidylethanolamine-binding protein 4 precursor	-	22570764	22785421	5.74094	7.25114
ASHGA5P043962	0.00237022	0.032646	2.84849	down	noncoding	TCONS_00018082	XLOC_008337	LincRNAs identified by Cabili et al	662	chr10	+	995366	998124	AGGAAGAAATCGCACCAGCCCAGAATCAACTGCATAACATACAAACTTTAAAAGGAAGAA	intergenic							3.41432	4.92451
ASHGA5P017320	0.00632117	0.0410595	2.84589	down	noncoding	ENST00000440123	RP11-302K17.7	GENCODE	374	chr10	+	103880409	103881139	TACCCTAGGCTGGATGGCTGCTGTCCTTTGAGGGCTTCGGAGATGAGAACAGGAAACAGG	bidirectional	NM_001113407	LDB1	LIM domain-binding protein 1 isoform 1	-	103867324	103880210	3.6298	5.13868
ASHGA5P052283	0.00833236	0.0440999	2.84499	down	noncoding	uc021yag.1	GUSBP9	UCSC_knowngene	660	chr5	-	69812078	69851200	AACGCTTGTAGGGTTTCACCAGGTAAGCGGTGTTGAACTTTCTGCTTGTGTATTCTCTCT	intergenic							2.86835	4.37677
ASHGA5P057613	0.00852316	0.0443648	2.84174	down	noncoding	TCONS_00019665	XLOC_009473	LincRNAs identified by Cabili et al	1173	chr11	-	65254017	65256453	ACTGTGCCCTTCATTTGGAACCTGCTGGAAGCTGTTCTGAACCAGAGAAGGATGAAAATA	intergenic							5.25373	6.7605
ASHGA5P048903	0.00661587	0.0415457	2.83796	down	noncoding	TCONS_00024905	XLOC_011826	LincRNAs identified by Cabili et al	2262	chr16	+	88217949	88220293	ACACCCAGACATGGATACACAGGCACACACATATTGGGACACCCACGCATAGACACTCAC	intergenic							4.97742	6.48227
ASHGA5P043292	0.0114499	0.0494106	2.83793	down	noncoding	ENST00000421965	AC006159.4	GENCODE	692	chr7	-	116203647	116211288	CTTTAAATCCACTCACACCCAACTTTTAAACAAAAAGTAGCAGTATATCCTACACACGAT	intergenic							3.77854	5.28338
ASHGA5P028755	0.00678154	0.04194	2.83515	down	noncoding	ENST00000414407	LINC00398	GENCODE	906	chr13	+	31377342	31384782	GACCCTTCCCACCATTTCAACATCATTAGGAATTTAACAGGCTTTTGCAAGAAGGCCCAG	intergenic							5.68182	7.18524
ASHGA5P047015	0.000482383	0.0192003	2.82618	down	noncoding	ENST00000449419	RP11-429G19.2	GENCODE	948	chr10	-	97634840	97667532	CCTGGGGCGTGGGTCTCTCATCCCTCTCGTCCTGGTGAAGAAGAAGAGTATACCCAGCGG	natural antisense	NM_001098175	ENTPD1	ectonucleoside triphosphate diphosphohydrolase 1 isoform 2	+	97471535	97637023	5.42624	6.9251
ASHGA5P047015	0.000482383	0.0192003	2.82618	down	noncoding	ENST00000449419	RP11-429G19.2	GENCODE	948	chr10	-	97634840	97667532	CCTGGGGCGTGGGTCTCTCATCCCTCTCGTCCTGGTGAAGAAGAAGAGTATACCCAGCGG	natural antisense	NM_001164178	ENTPD1	ectonucleoside triphosphate diphosphohydrolase 1 isoform 3	+	97515408	97637023	5.42624	6.9251
ASHGA5P047015	0.000482383	0.0192003	2.82618	down	noncoding	ENST00000449419	RP11-429G19.2	GENCODE	948	chr10	-	97634840	97667532	CCTGGGGCGTGGGTCTCTCATCCCTCTCGTCCTGGTGAAGAAGAAGAGTATACCCAGCGG	natural antisense	NM_001164179	ENTPD1	ectonucleoside triphosphate diphosphohydrolase 1 isoform 4	+	97515672	97637023	5.42624	6.9251
ASHGA5P047015	0.000482383	0.0192003	2.82618	down	noncoding	ENST00000449419	RP11-429G19.2	GENCODE	948	chr10	-	97634840	97667532	CCTGGGGCGTGGGTCTCTCATCCCTCTCGTCCTGGTGAAGAAGAAGAGTATACCCAGCGG	natural antisense	NM_001164181	ENTPD1	ectonucleoside triphosphate diphosphohydrolase 1 isoform 5	+	97515408	97637023	5.42624	6.9251
ASHGA5P047015	0.000482383	0.0192003	2.82618	down	noncoding	ENST00000449419	RP11-429G19.2	GENCODE	948	chr10	-	97634840	97667532	CCTGGGGCGTGGGTCTCTCATCCCTCTCGTCCTGGTGAAGAAGAAGAGTATACCCAGCGG	natural antisense	NM_001164182	ENTPD1	ectonucleoside triphosphate diphosphohydrolase 1 isoform 6	+	97515672	97637023	5.42624	6.9251
ASHGA5P047015	0.000482383	0.0192003	2.82618	down	noncoding	ENST00000449419	RP11-429G19.2	GENCODE	948	chr10	-	97634840	97667532	CCTGGGGCGTGGGTCTCTCATCCCTCTCGTCCTGGTGAAGAAGAAGAGTATACCCAGCGG	natural antisense	NM_001164183	ENTPD1	ectonucleoside triphosphate diphosphohydrolase 1 isoform 6	+	97515672	97637023	5.42624	6.9251
ASHGA5P047015	0.000482383	0.0192003	2.82618	down	noncoding	ENST00000449419	RP11-429G19.2	GENCODE	948	chr10	-	97634840	97667532	CCTGGGGCGTGGGTCTCTCATCCCTCTCGTCCTGGTGAAGAAGAAGAGTATACCCAGCGG	natural antisense	NM_001776	ENTPD1	ectonucleoside triphosphate diphosphohydrolase 1 isoform 1	+	97515672	97637023	5.42624	6.9251
ASHGA5P055321	0.0016663	0.0293469	2.8254	down	noncoding	ENST00000541860	RP11-59N23.3	GENCODE	578	chr12	+	21815246	21912966	CTCACTCCACGGAACGTGCAAAAGGTCAAGACATACAAACTCAGAGTTTTTAAAATCAAG	intronic antisense	ENST00000539782	LDHB	lactate dehydrogenase B [Source:HGNC Symbol;Acc:6541]	-	21796983	21910791	4.54495	6.0434
ASHGA5P028616	0.0104872	0.0478374	2.82199	down	noncoding	ENST00000423249	BX004987.4	GENCODE	1789	chr1	-	143354962	143465438	GTGCACACTTGTGTGTATGCTTTAGATCCTGTTTTTTGTTGTTGTTGTTGTTTTGGTTTG	intergenic							3.65424	5.15096
ASHGA5P046510	0.0414305	0.104437	2.81953	down	noncoding	uc004dgq.1	AX747333	UCSC_knowngene	2212	chrX	+	46319732	46321944	AGGCTTCCTCCCTGCCTCTGTTTCATCTATGAGTGTCTTGAGTGTCTTAAGTGTCACTTT	intron sense-overlapping	NM_001129898	ZNF673	protein ZNF673 isoform 1	+	46306623	46334074	7.93238	9.42783
ASHGA5P046510	0.0414305	0.104437	2.81953	down	noncoding	uc004dgq.1	AX747333	UCSC_knowngene	2212	chrX	+	46319732	46321944	AGGCTTCCTCCCTGCCTCTGTTTCATCTATGAGTGTCTTGAGTGTCTTAAGTGTCACTTT	intron sense-overlapping	NM_001129899	ZNF673	protein ZNF673 isoform 3	+	46306623	46334074	7.93238	9.42783
ASHGA5P046510	0.0414305	0.104437	2.81953	down	noncoding	uc004dgq.1	AX747333	UCSC_knowngene	2212	chrX	+	46319732	46321944	AGGCTTCCTCCCTGCCTCTGTTTCATCTATGAGTGTCTTGAGTGTCTTAAGTGTCACTTT	intron sense-overlapping	NM_001129900	ZNF673	protein ZNF673 isoform 4	+	46306623	46334074	7.93238	9.42783
ASHGA5P046510	0.0414305	0.104437	2.81953	down	noncoding	uc004dgq.1	AX747333	UCSC_knowngene	2212	chrX	+	46319732	46321944	AGGCTTCCTCCCTGCCTCTGTTTCATCTATGAGTGTCTTGAGTGTCTTAAGTGTCACTTT	intron sense-overlapping	NM_017776	ZNF673	protein ZNF673 isoform 2	+	46306623	46334074	7.93238	9.42783
ASHGA5P051824	0.000781233	0.0233124	2.81944	down	noncoding	ENST00000420064	RP11-175P19.2	pseudogene	602	chr3	-	193296600	193297202	TGCCCTTCTGCCTTACACACAGGGTGTGAAAAAACTAATTGTTGGAGTTGACAAAATGGA								3.88072	5.37613
ASHGA5P000401	0.0194493	0.0658538	2.81907	down	noncoding	chr3:45182150-45196400-	chr3:45182150-45196400	LincRNAs identified by Khalil et al	14250	chr3	-	45207146	45221396	CCAAGGCCAGCCAGTTATCTTGGGGAGAGAAACTAGGTCATGTTTTCTTCCAAACATCTT	intergenic							3.55213	5.04734
ASHGA5P031111	0.00358195	0.0364387	2.81264	down	noncoding	ENST00000562604	RP11-56L13.7	GENCODE	262	chr16	-	32261940	32265743	GCAACTGAGTGACGTGCATAATTCTCTCCAAAGTAAAAGTCCTTTTTGTTTTTTGCAATT	intronic antisense	NM_001243722	LOC729264	TP53-target gene 3 protein-like	+	32264649	32267243	2.84658	4.33851
ASHGA5P041775	0.00884146	0.044869	2.80616	down	noncoding	ENST00000458633	C4A-AS1	GENCODE	2095	chr6	-	31967752	31971298	CCACCACACCTTTCTCACATTTTCTCCCAGAGGTTACAGTAAATGTTCCAAAACTTTTTT	natural antisense	NM_001002029	C4B	complement C4-B preproprotein	+	31949833	31970458	3.88714	5.37574
ASHGA5P041775	0.00884146	0.044869	2.80616	down	noncoding	ENST00000458633	C4A-AS1	GENCODE	2095	chr6	-	31967752	31971298	CCACCACACCTTTCTCACATTTTCTCCCAGAGGTTACAGTAAATGTTCCAAAACTTTTTT	natural antisense	NM_001242823	LOC100293534	complement C4-B-like preproprotein	+	31949833	31970458	3.88714	5.37574
ASHGA5P041775	0.00884146	0.044869	2.80616	down	noncoding	ENST00000458633	C4A-AS1	GENCODE	2095	chr6	-	31967752	31971298	CCACCACACCTTTCTCACATTTTCTCCCAGAGGTTACAGTAAATGTTCCAAAACTTTTTT	natural antisense	NM_001252204	C4A	complement C4-A isoform 2 preproprotein	+	31949833	31970457	3.88714	5.37574
ASHGA5P041775	0.00884146	0.044869	2.80616	down	noncoding	ENST00000458633	C4A-AS1	GENCODE	2095	chr6	-	31967752	31971298	CCACCACACCTTTCTCACATTTTCTCCCAGAGGTTACAGTAAATGTTCCAAAACTTTTTT	natural antisense	NM_007293	C4A	complement C4-A isoform 1 preproprotein	+	31949833	31970457	3.88714	5.37574
ASHGA5P019698	0.00248397	0.0333887	2.80585	down	noncoding	ENST00000500695	RP11-637A17.2	GENCODE	1733	chr12	-	69068150	69080639	GTTTTGGGCTCACACCATTGATACATTTGATCCTTAAGGCAAGCCCACCCCGCCTCACTC	natural antisense	ENST00000229179	NUP107	nucleoporin 107kDa [Source:HGNC Symbol;Acc:29914]	+	69080513	69136785	6.72175	8.21019
ASHGA5P046661	0.0417502	0.104848	2.80556	down	noncoding	ENST00000441841	RP3-473B4.3	GENCODE	961	chrX	+	134083578	134087412	TAAGGAAGATTTGAAGATCAAAGACCTTCCTCTCTCTGGCTTCACATTTCTCATCACTAG	intergenic							4.37839	5.86668
ASHGA5P042325	0.00487297	0.0391245	2.80521	down	noncoding	ENST00000499525	RP5-1186N24.3	GENCODE	2874	chr6	+	28555154	28559524	CGTTAATTTCGGGCCACTTTCACCTTTCCCTTTCACCCTAAATCAGACTTAAAAAGAAAT	bidirectional	NM_052923	SCAND3	SCAN domain-containing protein 3	-	28539406	28555112	6.0949	7.58301
ASHGA5P034505	0.000581171	0.0207526	2.80518	down	noncoding	uc002nbr.3	UCA1	UCSC_knowngene	1413	chr19	+	15939756	15946230	AACATTATTCCTTCCTTGGCCTAAAAACTCATCGCCACCTACATTAAAGCTAATATGCCT	intergenic							8.93885	10.4269
ASHGA5P051477	0.00809956	0.0437937	2.80384	down	noncoding	ENST00000427309	BX571672.5	GENCODE	677	chr1	-	143229765	143233121	TGCTACTAAGGTAAAGTGGTCTCTTGTAAAATTAATCTTCTCACTCTGAGTGTAGTTTTG	intergenic							3.42719	4.9146
ASHGA5P047828	0.0123324	0.0513858	2.80277	down	noncoding	NR_024567	LOC100130557	RefSeq	3182	chr1	-	41154751	41157933	GCTATAGTCTTTATTATCAATAGCCTCCGCCCTTCCCTTTCTAAAGCCGTTGCTATCTGG	natural antisense	NM_001142587	NFYC	nuclear transcription factor Y subunit gamma isoform 3	+	41157241	41237275	7.52105	9.0079
ASHGA5P047828	0.0123324	0.0513858	2.80277	down	noncoding	NR_024567	LOC100130557	RefSeq	3182	chr1	-	41154751	41157933	GCTATAGTCTTTATTATCAATAGCCTCCGCCCTTCCCTTTCTAAAGCCGTTGCTATCTGG	natural antisense	NM_001142588	NFYC	nuclear transcription factor Y subunit gamma isoform 1	+	41157241	41237275	7.52105	9.0079
ASHGA5P047828	0.0123324	0.0513858	2.80277	down	noncoding	NR_024567	LOC100130557	RefSeq	3182	chr1	-	41154751	41157933	GCTATAGTCTTTATTATCAATAGCCTCCGCCCTTCCCTTTCTAAAGCCGTTGCTATCTGG	natural antisense	NM_001142589	NFYC	nuclear transcription factor Y subunit gamma isoform 4	+	41157241	41237275	7.52105	9.0079
ASHGA5P047828	0.0123324	0.0513858	2.80277	down	noncoding	NR_024567	LOC100130557	RefSeq	3182	chr1	-	41154751	41157933	GCTATAGTCTTTATTATCAATAGCCTCCGCCCTTCCCTTTCTAAAGCCGTTGCTATCTGG	natural antisense	NM_001142590	NFYC	nuclear transcription factor Y subunit gamma isoform 5	+	41157679	41237275	7.52105	9.0079
ASHGA5P047828	0.0123324	0.0513858	2.80277	down	noncoding	NR_024567	LOC100130557	RefSeq	3182	chr1	-	41154751	41157933	GCTATAGTCTTTATTATCAATAGCCTCCGCCCTTCCCTTTCTAAAGCCGTTGCTATCTGG	natural antisense	NM_014223	NFYC	nuclear transcription factor Y subunit gamma isoform 2	+	41157241	41237275	7.52105	9.0079
ASHGA5P032297	0.0120069	0.0505621	2.80268	down	noncoding	TCONS_00016037	XLOC_007432	LincRNAs identified by Cabili et al	310	chr9	+	88068943	88069347	TAAAGCCAAACCATTCCAGCCACCCTGCAGATCTACCGAGGAGGAAAACTAATGTTTGTT	intergenic							6.95515	8.44196
ASHGA5P038080	0.00720517	0.0425202	2.80243	down	noncoding	ENST00000412804	AC024168.2	GENCODE	858	chr3	-	4532574	4534847	TTGTGCTCTCTACCTCCCCTGACCCAGAAGGACTTATTCTTCTTTCTGCACATTTTAGTA	bidirectional	NM_001099952	ITPR1	inositol 1,4,5-trisphosphate receptor type 1 isoform 1	+	4535031	4889524	9.06668	10.5534
ASHGA5P038080	0.00720517	0.0425202	2.80243	down	noncoding	ENST00000412804	AC024168.2	GENCODE	858	chr3	-	4532574	4534847	TTGTGCTCTCTACCTCCCCTGACCCAGAAGGACTTATTCTTCTTTCTGCACATTTTAGTA	bidirectional	NM_001168272	ITPR1	inositol 1,4,5-trisphosphate receptor type 1 isoform 3	+	4535031	4889524	9.06668	10.5534
ASHGA5P038080	0.00720517	0.0425202	2.80243	down	noncoding	ENST00000412804	AC024168.2	GENCODE	858	chr3	-	4532574	4534847	TTGTGCTCTCTACCTCCCCTGACCCAGAAGGACTTATTCTTCTTTCTGCACATTTTAGTA	bidirectional	NM_002222	ITPR1	inositol 1,4,5-trisphosphate receptor type 1 isoform 2	+	4535031	4889524	9.06668	10.5534
ASHGA5P027761	0.00515156	0.0396515	2.80055	down	noncoding	ENST00000544842	RP11-319E16.2	GENCODE	3387	chr12	+	5425126	5428513	AAGTTTCTTTTGTGTCCTTTATATCCCCCTAACAACAGGGAAGTTTTATCAGTAAATGCC	intergenic							4.55258	6.03829
ASHGA5P048035	0.00677216	0.0419383	2.79718	down	noncoding	ENST00000511537	HNRNPKP3	GENCODE	1882	chr11	-	43283053	43290919	ACCCCTCCATCATACCTTTTAAAACTAACAACTGTGAATCGTTTATTGTGTTAACCCTAT	intergenic							6.27574	7.75971
ASHGA5P029866	0.0267823	0.0789765	2.79531	down	noncoding	ENST00000558398	HERC2P2	GENCODE	578	chr15	-	23285219	23293417	CGGCCCAATTTTCCAAAGTCACCATCACCCCAGGAAAATACCAAACCTAGGTTTAAAAAT	intergenic							5.3948	6.87781
ASHGA5P055201	0.0178658	0.0624785	2.79434	down	noncoding	ENST00000534782	RP11-820L6.1	GENCODE	444	chr11	-	122026258	122073770	TTCTCCTCCTGTCCTGTAACTGGTTTTCACTCACTCAACTGAGAGATTTCTTTGTTGCAA	intergenic							5.47568	6.95818
ASHGA5P031265	0.0125103	0.0517763	2.79301	down	noncoding	TCONS_00006934	XLOC_002775	LincRNAs identified by Cabili et al	473	chr3	+	118207644	118212448	TTACTTTAGAGAAGTCTGAACTTGCCCTTTTTTTCATCTTTATGCCTGAGGAAATTTTTC	intergenic							5.253	6.73482
ASHGA5P030699	0.0164678	0.0599723	2.79285	down	noncoding	uc010bls.1	LOC390660	UCSC_knowngene	2700	chr15	+	82619907	82623844	TTGGGAGTCATCTCATCTTTGTCTGGCTTGGCCTGTCTCCTTTCCTCTGTATCTTTGACC	intergenic							5.2082	6.68994
ASHGA5P029320	0.0119568	0.0505518	2.78955	down	noncoding	TCONS_00010233	XLOC_004700	LincRNAs identified by Cabili et al	904	chr5	-	1041886	1042973	ATTCGTTCACACACCCATTCACAAACCCAGTCGTTCATACACCCATTCACACACTAACTC	intergenic							4.84863	6.32866
ASHGA5P028599	0.0408626	0.10343	2.78892	down	noncoding	ENST00000452852	LINC00393	GENCODE	485	chr13	-	74120524	74222390	GCAAAAATGTTCCAAAAGATACTCTCTCTGTCCAATACACTTGTAAGTGCATTCTAGAAT	intergenic							4.03392	5.51363
ASHGA5P056435	0.000696505	0.0225597	2.78479	down	noncoding	TCONS_00004261	XLOC_002102	LincRNAs identified by Cabili et al	360	chr2	-	57541337	57542640	CCTGTCCAATAGTAAGACACACACACAGAGAAGAACAACAAGAACAAGAAGAGAATTGCA	intergenic							3.89521	5.37278
ASHGA5P045732	0.000123489	0.0127748	2.7832	down	noncoding	uc004adg.1	AK126080	UCSC_knowngene	3223	chr9	+	44384584	44391314	GGTCCCAGTGTTGCTTATTGTAAAATTTACTATCTTCACTTAACCACAATAAAAGCTGTG	intergenic							3.25378	4.73053
ASHGA5P031153	0.00783897	0.0433873	2.7822	down	noncoding	ENST00000563124	RP11-305A4.3	GENCODE	2085	chr16	-	49954640	49958065	ACAAACTCTCAACTCTGTCAGAAAATGGGCTGTGTCTGTGCCTCTCTCTCTTTCCTAGAA	intergenic							7.16192	8.63814
ASHGA5P039208	0.0395462	0.101547	2.78161	down	noncoding	ENST00000415532	RP11-411H5.1	GENCODE	478	chr1	+	102189297	102195170	ACCTCCTCCAAAGAGTGTCATCTGTCAATATAATGTCATCTCTTGATTTCTCTGTTTTCT	intergenic							3.82666	5.30258
ASHGA5P047857	0.0022432	0.0319402	2.78043	down	noncoding	ENST00000454892	HBBP1	GENCODE	455	chr11	-	5263183	5264496	CTGCCTGCTGATTCAGTTCCTGCATGATAAAAATAGAATAAAGAAATATGCTCTCTAAGA	intergenic							4.30196	5.77726
ASHGA5P017375	0.00321189	0.0360585	2.78029	down	noncoding	ENST00000440802	AC097532.2	GENCODE	322	chr2	-	133043367	133051950	GTACACTTGGATATTTACTCACCTTTTTCTCATTCACTATGTCTGCCGTGGTCTCGATGA	intergenic							4.03717	5.51241
ASHGA5P022832	0.00328347	0.0361534	2.77599	down	noncoding	ENST00000563709	CTD-2524L6.2	GENCODE	391	chr15	+	72109800	72110589	GTGTGTGTACCCAGCAGAAATGCCCACCGAAAGATATTACCTCAATAAAAAAGTAAAAAA	exon sense-overlapping	NM_014249	NR2E3	photoreceptor-specific nuclear receptor isoform b	+	72102893	72110597	3.42085	4.89385
ASHGA5P055890	0.0148258	0.0563856	2.77053	down	noncoding	TCONS_00003962	XLOC_001780	LincRNAs identified by Cabili et al	287	chr2	+	186031548	186061503	AAACCTTGTCTCTCCCAAGTACCTTCTGTCTCTGGCAGCTCCATGTAAACTTCAGGAATG	intergenic							5.50816	6.97833
ASHGA5P049201	0.0102402	0.0473781	2.76958	down	noncoding	uc021thk.1	IGH	UCSC_knowngene	377	chr16	-	33752510	33752887	GCTATGTGTGGCAGTTTCTGACCAGGATGTCTCTGTGTTTGCAGGTGTGCAGTGTGAGGT	intergenic							3.22736	4.69703
ASHGA5P045034	0.0273965	0.0802741	2.76874	down	noncoding	ENST00000524100	RP11-473O4.5	GENCODE	917	chr8	+	130844546	130856750	GCACACTGCATCACCACACTCACTTATCAAGAAAAGGCCAATATTATCTAATATACGTGA	natural antisense	NM_001256763	FAM49B	protein FAM49B	-	130851838	130952118	4.73551	6.20474
ASHGA5P045034	0.0273965	0.0802741	2.76874	down	noncoding	ENST00000524100	RP11-473O4.5	GENCODE	917	chr8	+	130844546	130856750	GCACACTGCATCACCACACTCACTTATCAAGAAAAGGCCAATATTATCTAATATACGTGA	natural antisense	NM_016623	FAM49B	protein FAM49B	-	130851838	130952118	4.73551	6.20474
ASHGA5P032241	0.00237207	0.032646	2.76487	down	noncoding	uc010vyc.2	CCDC144B	UCSC_knowngene	2454	chr17	-	18486654	18528930	TGGCTTGGCGGTCCTCCTTTCGCAGATTGGAAACCGCGGGCTATCCTGCTGGGAGGTTGT	intergenic							4.98292	6.45012
ASHGA5P013840	0.000344568	0.016483	2.76304	down	noncoding	NR_026966	LOC100130691	RefSeq	5223	chr2	-	178148235	178257419	TCCTGCACGTCTGATACAGCCAAACTCCACGCCACCTGGTTTGCTCAACAGCAAAAGACA	natural antisense	ENST00000264167	AGPS	alkylglycerone phosphate synthase [Source:HGNC Symbol;Acc:327]	+	178257371	178408564	5.90671	7.37297
ASHGA5P048453	0.00402249	0.0377672	2.76298	down	noncoding	ENST00000543486	RP11-667M19.2	GENCODE	586	chr11	-	113641114	113642413	CTCATAAGCAAGCCAAAATACTGTCTTCATATCTGTTTTTCTTGCAAACATGTATCATCC	intron sense-overlapping	NM_004724	ZW10	centromere/kinetochore protein zw10 homolog	-	113603904	113644485	4.79178	6.25801
ASHGA5P052447	0.000785676	0.0233124	2.76166	down	noncoding	ENST00000443800	AC005592.2	GENCODE	566	chr5	+	141783765	142051566	TGCTGGTAGACGCACACCATCACATCCTACATAATATTTAGCTCTGAGGCGTTTCCAGAT	intronic antisense	NM_000800	FGF1	fibroblast growth factor 1 isoform 1 precursor	-	141971742	142066060	3.3948	4.86034
ASHGA5P052447	0.000785676	0.0233124	2.76166	down	noncoding	ENST00000443800	AC005592.2	GENCODE	566	chr5	+	141783765	142051566	TGCTGGTAGACGCACACCATCACATCCTACATAATATTTAGCTCTGAGGCGTTTCCAGAT	intronic antisense	NM_001144892	FGF1	fibroblast growth factor 1 isoform 1 precursor	-	141971742	142000920	3.3948	4.86034
ASHGA5P052447	0.000785676	0.0233124	2.76166	down	noncoding	ENST00000443800	AC005592.2	GENCODE	566	chr5	+	141783765	142051566	TGCTGGTAGACGCACACCATCACATCCTACATAATATTTAGCTCTGAGGCGTTTCCAGAT	intronic antisense	NM_001144934	FGF1	fibroblast growth factor 1 isoform 1 precursor	-	141971742	142077635	3.3948	4.86034
ASHGA5P052447	0.000785676	0.0233124	2.76166	down	noncoding	ENST00000443800	AC005592.2	GENCODE	566	chr5	+	141783765	142051566	TGCTGGTAGACGCACACCATCACATCCTACATAATATTTAGCTCTGAGGCGTTTCCAGAT	intronic antisense	NM_001144935	FGF1	fibroblast growth factor 1 isoform 1 precursor	-	141971742	142077635	3.3948	4.86034
ASHGA5P052447	0.000785676	0.0233124	2.76166	down	noncoding	ENST00000443800	AC005592.2	GENCODE	566	chr5	+	141783765	142051566	TGCTGGTAGACGCACACCATCACATCCTACATAATATTTAGCTCTGAGGCGTTTCCAGAT	intronic antisense	NM_001257205	FGF1	fibroblast growth factor 1 isoform 1 precursor	-	141971742	142077635	3.3948	4.86034
ASHGA5P052447	0.000785676	0.0233124	2.76166	down	noncoding	ENST00000443800	AC005592.2	GENCODE	566	chr5	+	141783765	142051566	TGCTGGTAGACGCACACCATCACATCCTACATAATATTTAGCTCTGAGGCGTTTCCAGAT	intronic antisense	NM_001257206	FGF1	fibroblast growth factor 1 isoform 4 precursor	-	141971742	142077635	3.3948	4.86034
ASHGA5P052447	0.000785676	0.0233124	2.76166	down	noncoding	ENST00000443800	AC005592.2	GENCODE	566	chr5	+	141783765	142051566	TGCTGGTAGACGCACACCATCACATCCTACATAATATTTAGCTCTGAGGCGTTTCCAGAT	intronic antisense	NM_001257207	FGF1	fibroblast growth factor 1 isoform 1 precursor	-	141971742	142066060	3.3948	4.86034
ASHGA5P052447	0.000785676	0.0233124	2.76166	down	noncoding	ENST00000443800	AC005592.2	GENCODE	566	chr5	+	141783765	142051566	TGCTGGTAGACGCACACCATCACATCCTACATAATATTTAGCTCTGAGGCGTTTCCAGAT	intronic antisense	NM_001257208	FGF1	fibroblast growth factor 1 isoform 1 precursor	-	141971742	142065268	3.3948	4.86034
ASHGA5P052447	0.000785676	0.0233124	2.76166	down	noncoding	ENST00000443800	AC005592.2	GENCODE	566	chr5	+	141783765	142051566	TGCTGGTAGACGCACACCATCACATCCTACATAATATTTAGCTCTGAGGCGTTTCCAGAT	intronic antisense	NM_001257209	FGF1	fibroblast growth factor 1 isoform 1 precursor	-	141971742	142065268	3.3948	4.86034
ASHGA5P052447	0.000785676	0.0233124	2.76166	down	noncoding	ENST00000443800	AC005592.2	GENCODE	566	chr5	+	141783765	142051566	TGCTGGTAGACGCACACCATCACATCCTACATAATATTTAGCTCTGAGGCGTTTCCAGAT	intronic antisense	NM_001257210	FGF1	fibroblast growth factor 1 isoform 1 precursor	-	141971742	142023866	3.3948	4.86034
ASHGA5P052447	0.000785676	0.0233124	2.76166	down	noncoding	ENST00000443800	AC005592.2	GENCODE	566	chr5	+	141783765	142051566	TGCTGGTAGACGCACACCATCACATCCTACATAATATTTAGCTCTGAGGCGTTTCCAGAT	intronic antisense	NM_001257211	FGF1	fibroblast growth factor 1 isoform 4 precursor	-	141971742	142065268	3.3948	4.86034
ASHGA5P052447	0.000785676	0.0233124	2.76166	down	noncoding	ENST00000443800	AC005592.2	GENCODE	566	chr5	+	141783765	142051566	TGCTGGTAGACGCACACCATCACATCCTACATAATATTTAGCTCTGAGGCGTTTCCAGAT	intronic antisense	NM_001257212	FGF1	fibroblast growth factor 1 isoform 4 precursor	-	141971742	142000920	3.3948	4.86034
ASHGA5P052447	0.000785676	0.0233124	2.76166	down	noncoding	ENST00000443800	AC005592.2	GENCODE	566	chr5	+	141783765	142051566	TGCTGGTAGACGCACACCATCACATCCTACATAATATTTAGCTCTGAGGCGTTTCCAGAT	intronic antisense	NM_033136	FGF1	fibroblast growth factor 1 isoform 2 precursor	-	141971742	142066060	3.3948	4.86034
ASHGA5P052447	0.000785676	0.0233124	2.76166	down	noncoding	ENST00000443800	AC005592.2	GENCODE	566	chr5	+	141783765	142051566	TGCTGGTAGACGCACACCATCACATCCTACATAATATTTAGCTCTGAGGCGTTTCCAGAT	intronic antisense	NM_033137	FGF1	fibroblast growth factor 1 isoform 3 precursor	-	141971742	141993726	3.3948	4.86034
ASHGA5P031782	0.0427932	0.10659	2.75965	down	noncoding	ENST00000567781	RP11-357N13.7	GENCODE	14892	chr16	+	54033348	54048240	CTGTGGTGCTTTGGTTGAAGCTCTCTGTCTGTTTTAGAGAAAAGACTTACAATGACCTCC	intron sense-overlapping	NM_001080432	FTO	alpha-ketoglutarate-dependent dioxygenase FTO	+	53737874	54148379	3.64445	5.10893
ASHGA5P046068	0.0296188	0.0841909	2.75957	down	noncoding	ENST00000503395	TUBBP5	GENCODE	1735	chr9	+	141044564	141070960	GGCCAGCAATTTTCTCCTTCTCCAGTTAAACCTGTCCAACATTGAGGAACCAATCTACAT	intergenic							3.95745	5.4219
ASHGA5P057022	0.00152722	0.0285017	2.75855	down	noncoding	TCONS_00012030	XLOC_005561	LincRNAs identified by Cabili et al	438	chr6	+	170462473	170466131	TCAAGAAGCCACCAGCCAGCATGGACATGAGGGAAAACAAAACACTCATGGGAAGAAGCG	intergenic							3.79968	5.26359
ASHGA5P056817	0.0310649	0.0866715	2.75736	down	noncoding	TCONS_00008982	XLOC_003839	LincRNAs identified by Cabili et al	232	chr4	+	190198382	190198838	ACATCGTAGGTGACAGGCTCTCATAGTCACCATCATCAAGGGAATCTTGTGCATGTTACA	intergenic							3.90929	5.37258
ASHGA5P042742	0.000782281	0.0233124	2.75226	down	noncoding	ENST00000436492	RP1-125N5.2	GENCODE	557	chr6	+	169116744	169123604	TGCCCTGGGTCCCTTGGAATAAGCTTGATTTAATTATCAAATTACATGGAAAGAAATAAG	intergenic							4.92363	6.38425
ASHGA5P026072	0.000589555	0.0207526	2.7474	down	noncoding	BF869766		LincRNAs identified by Khalil et al	113	chr5	-	61582993	61583108	AGGACCTTGTCCAGCCTCCATTCCTGACACCCTCTCTGAAAGGATATCACTTCTGTTAGA	intergenic							7.95451	9.41258
ASHGA5P029560	0.00352397	0.0363085	2.7471	down	noncoding	ENST00000554458	RP11-813I20.2	GENCODE	459	chr14	+	56214925	56239921	CTCCCAGTTCCTCCTTTTCTCAATTAAGCTATAATTAGCAGAATAGTTGTTCTTAGATAC	intergenic							4.56994	6.02785
ASHGA5P057976	0.0228365	0.0719424	2.74362	down	noncoding	TCONS_00024510	XLOC_011826	LincRNAs identified by Cabili et al	947	chr16	+	88219180	88220350	TCGCACACACGCATACACGTGCCCAGACCTACAGACACACTCACATTTGCACAGTCACAC	intergenic							5.08882	6.5449
ASHGA5P044170	0.00786448	0.0434017	2.74199	down	noncoding	TCONS_00014735	XLOC_006820	LincRNAs identified by Cabili et al	585	chr8	+	64366194	64369530	CTGCCTGCATGTGGATTCATTTTAGCAGTTTATCAATTTGGACAGGGAATTTTGAATAAA	intergenic							3.6982	5.15342
ASHGA5P047617	0.000587826	0.0207526	2.74185	down	noncoding	ENST00000445808	RP11-452K12.4	GENCODE	805	chr10	+	99094320	99102960	ACCTGCCTGCCCATTTGGAAATGCAGACTGGAGGACGCTAAGTTCATTCTTACCTATGTA	natural antisense	NM_012083	FRAT2	GSK-3-binding protein FRAT2	-	99092253	99094458	5.79054	7.24569
ASHGA5P056003	0.00147949	0.0283626	2.73916	down	noncoding	TCONS_00025501	XLOC_012315	LincRNAs identified by Cabili et al	1201	chr17	+	75249935	75254238	TTTCTGGAAGGCACCACTCCAAACCGTCTCCTTGGAAAAGCAACTTCAGCCCCAGTGCCT	intergenic							6.4737	7.92743
ASHGA5P045621	0.0138531	0.0543942	2.73777	down	noncoding	ENST00000428006	RP11-536O18.1	GENCODE	477	chr9	+	13446524	13487510	ATCTCTGTCTCCAACCCACAAACCACATGCATCATAAATAAATTAAAATACCAAAACTTT	intergenic							5.34891	6.80191
ASHGA5P031719	0.0110628	0.0489963	2.73403	down	noncoding	ENST00000565523	RP11-244B22.11	GENCODE	703	chr16	+	34378092	34379252	TTGCTCTATCTGCCATAGGAGCCTAGAGGCTTGGTCTGGCTTAAAGTCTTCAACAAAGAA	intergenic							3.53286	4.98388
ASHGA5P057169	0.000759391	0.02311	2.73165	down	noncoding	TCONS_00013994	XLOC_006638	LincRNAs identified by Cabili et al	229	chr7	-	148321790	148322542	GTGCCTGGCTGCTTTGGCGTCTCCAAGTACCTGACCTCAGCTCAACCTGTCTTGGGTTTT	intergenic							4.9355	6.38527
ASHGA5P028586	0.00954592	0.0461336	2.73088	down	noncoding	ENST00000447389	BX571672.2	GENCODE	1410	chr1	-	143188794	143196803	CCAAGTCATCATTGATACTTTAGTAAAGGTTAGTAAAGGTCATCGAAGGCTTATTTGCAT	intergenic							2.9619	4.41126
ASHGA5P021548	0.00600735	0.0405793	2.72954	down	noncoding	ENST00000534700	RP11-106J23.2	pseudogene	1315	chr16	-	70044653	70099679	ATATCCAGAGATATTCCAGGCCCACTCCAGGGCAGAATCCAAAATATTGGAGAACAAGGT								4.23186	5.68052
ASHGA5P039116	0.0340687	0.0919367	2.7281	down	noncoding	ENST00000469196	RP11-6F2.5	GENCODE	1497	chr3	+	156799629	156806336	CCTTCCCTGATTTCAAAAAATAAAAATAAAAATGCTTCGGTTCTGAGGAGTAACTCTCCA	intergenic							3.4174	4.86529
ASHGA5P037061	0.00461391	0.0388724	2.72618	down	noncoding	TCONS_00025656	XLOC_012482	LincRNAs identified by Cabili et al	691	chr17	-	41754164	41768355	AGAAATCACCACTGGCTATTGTGACCTCCAAAGGCACTTGTCACTACACAGTGACACAAA	intergenic							4.16261	5.60949
ASHGA5P049092	0.00667561	0.041722	2.71547	down	noncoding	TCONS_00023573	XLOC_011397	LincRNAs identified by Cabili et al	2770	chr15	-	22541417	22545668	TCCAGCTGCGACATGTGCTTCCTTCCCTTGGCCTGAGTCCTGCTTTCCTGTGATTGAGAA	intergenic							11.3908	12.832
ASHGA5P047572	0.0279027	0.0811642	2.71487	down	noncoding	TCONS_00014179	XLOC_006188	LincRNAs identified by Cabili et al	233	chr7	+	99597001	99605862	CCCCACCTGCAGAGTCAAGTCCCTCCTCCCACCTCAGCACTGCTAGAAAAGAGCTTCAGG	intergenic							8.95559	10.3965
ASHGA5P023070	0.0194541	0.0658538	2.71398	down	noncoding	ENST00000568972	RP11-586K12.11	GENCODE	358	chr16	+	32660513	32661722	TGCATGAACTTTTAAGACAAACACAAGGCCCCACAAAAGGGTTCCAGGCAAGTCAGTTCT	intergenic							3.95586	5.39627
ASHGA5P027132	0.00509045	0.0394114	2.70987	down	noncoding	uc001rgu.1	LOC100506451	UCSC_knowngene	2084	chr12	-	26097789	26110985	CATTTAGCCACTGTTACTGATAATTTGGATGGAAAAGAAAAATAAATTATATCACCTCTC	bidirectional	NM_001164748	RASSF8	ras association domain-containing protein 8 isoform a	+	26111963	26225807	3.39462	4.83284
ASHGA5P027132	0.00509045	0.0394114	2.70987	down	noncoding	uc001rgu.1	LOC100506451	UCSC_knowngene	2084	chr12	-	26097789	26110985	CATTTAGCCACTGTTACTGATAATTTGGATGGAAAAGAAAAATAAATTATATCACCTCTC	bidirectional	NM_007211	RASSF8	ras association domain-containing protein 8 isoform b	+	26111963	26232825	3.39462	4.83284
ASHGA5P031638	0.0292475	0.0834523	2.7083	down	noncoding	uc010vdm.1	RRN3P2	UCSC_knowngene	1256	chr16	+	29086162	29107582	TTGTTGGTCTGGCTGACTTCTGTTCCTCTTTTAAAAATTTAAGTTTGGCCGGGTGCGGTG	intergenic							4.67268	6.11006
ASHGA5P015646	0.0198411	0.0665774	2.70819	down	noncoding	ENST00000422194	RP11-402P6.9	GENCODE	697	chrX	-	70882844	70885603	AGGGCTGTCCTCGGTGCATCCGGCTGCAGAGGGAAATTGAGGACCTTAGAGACCAACTAG	intergenic							2.83778	4.27511
ASHGA5P037004	0.00197739	0.0309043	2.706	down	noncoding	ENST00000435497	LINC00028	GENCODE	587	chr20	+	30073580	30075377	GTGAGAAAACCACACTCTTCCTCAGCCTATTATAGTTTAAAAAGTACTTTCTCATCCATA	intergenic							4.13124	5.5674
ASHGA5P027810	0.00831974	0.0440999	2.70588	down	noncoding	TCONS_00010831	XLOC_004632	LincRNAs identified by Cabili et al	621	chr5	+	171962066	171963089	ATAAACGTACTGACTGAGACTCATGCACACACACATGACAGAGGGACAGAAGCTCTATGA	intergenic							4.46403	5.90013
ASHGA5P044545	0.0127643	0.0523344	2.70585	down	noncoding	ENST00000429151	AF230666.2	GENCODE	773	chr8	-	133850374	133856543	CCAGGAAAAAGTCACACCTCTTCCCTTCCAGTAGGATAGTAATTTTGTTGATAAATATAT	natural antisense	NM_016018	PHF20L1	PHD finger protein 20-like protein 1 isoform 1	+	133787603	133861052	5.0541	6.49019
ASHGA5P027689	0.00737638	0.0427228	2.70432	down	noncoding	ENST00000538901	LINC00508	GENCODE	194	chr12	-	128425139	128434705	TGGAGAATAGACAAAGCTACCCAGCCCAGCCACAGCCTCATAATCTTGTTCTACCTCCCT	intergenic							6.24773	7.683
ASHGA5P054659	0.00341486	0.0361534	2.70347	down	noncoding	NR_029409	LOC255512	RefSeq	1024	chr11	+	1330937	1331937	TGCTCTCTCCTCGAGCCCTGCAGCCCGGCGAAATGGCTCCCGGCGGGGCCGTTTGCGCAT	bidirectional	NM_019009	TOLLIP	toll-interacting protein	-	1295597	1330892	5.00566	6.44047
ASHGA5P030716	0.00469116	0.0390427	2.7025	down	noncoding	TCONS_00007063	XLOC_002975	LincRNAs identified by Cabili et al	472	chr3	+	193788013	193796527	TCTGACTTCCCTTCTTAGCAAAACTTCTAATGTCCTAGTGGACGTGGCAACAGCTTGAAA	intergenic							3.5411	4.9754
ASHGA5P048784	0.00306386	0.0356266	2.70214	down	noncoding	ENST00000562130	RP11-941F15.1	GENCODE	533	chr15	-	74211495	74218683	GTGCTCCCTCAGTCCCTGGAGTTCCCAGCCAAGCCACAGACCTGCCTCTGAGGAAGGGAA	bidirectional	NM_005576	LOXL1	lysyl oxidase homolog 1 preproprotein	+	74218788	74244478	6.99357	8.42768
ASHGA5P026675	0.00133004	0.0275471	2.70168	down	noncoding	ENST00000534168	RP11-452H21.1	GENCODE	437	chr11	+	78035803	78155095	GACAATTTCCTCTCTCTTGCACCATTTGTGTAGTATACTGAACACAAATGTATTTTCTTC	intronic antisense	NM_012296	GAB2	GRB2-associated-binding protein 2 isoform b	-	77926335	78052926	4.2751	5.70896
ASHGA5P026675	0.00133004	0.0275471	2.70168	down	noncoding	ENST00000534168	RP11-452H21.1	GENCODE	437	chr11	+	78035803	78155095	GACAATTTCCTCTCTCTTGCACCATTTGTGTAGTATACTGAACACAAATGTATTTTCTTC	intronic antisense	NM_080491	GAB2	GRB2-associated-binding protein 2 isoform a	-	77926335	78128868	4.2751	5.70896
ASHGA5P026675	0.00133004	0.0275471	2.70168	down	noncoding	ENST00000534168	RP11-452H21.1	GENCODE	437	chr11	+	78035803	78155095	GACAATTTCCTCTCTCTTGCACCATTTGTGTAGTATACTGAACACAAATGTATTTTCTTC	natural antisense	NM_001243251	NARS2	probable asparagine--tRNA ligase, mitochondrial isoform 2	-	78147006	78285909	4.2751	5.70896
ASHGA5P026675	0.00133004	0.0275471	2.70168	down	noncoding	ENST00000534168	RP11-452H21.1	GENCODE	437	chr11	+	78035803	78155095	GACAATTTCCTCTCTCTTGCACCATTTGTGTAGTATACTGAACACAAATGTATTTTCTTC	natural antisense	NM_024678	NARS2	probable asparagine--tRNA ligase, mitochondrial isoform 1 precursor	-	78147006	78285909	4.2751	5.70896
ASHGA5P017497	0.00741948	0.0427823	2.69459	down	noncoding	ENST00000442370	RP11-107C16.2	GENCODE	536	chr10	+	124578331	124583027	GTGTGCGCAGGTCTGGCTGACTCTCTTGTACCTAAGGACAATGGTAAAGTCTTCCCTCTA	intergenic							3.01863	4.44869
ASHGA5P032271	0.0128367	0.0524676	2.69441	down	noncoding	BE174175		LincRNAs identified by Khalil et al	327	chr10	+	112287106	112287405	TGGGGATGGGGAGAGCCCTTCCGGCATTCCTTCTCTCATTCACTCTAATAACATTTATAT	intergenic							4.44782	5.87779
ASHGA5P035232	0.00369018	0.0369302	2.69189	down	noncoding	ENST00000414159	AC114776.3	GENCODE	4395	chr2	-	111467151	111474172	ATTTTTATTCTTCAGCTCTTTTGTTTTGGCTGGGGCTACCTGAGTCCTCCTTCCAGTTGT	intergenic							5.3995	6.82812
ASHGA5P035341	0.0106634	0.0481051	2.69115	down	noncoding	ENST00000546678	RP11-570L15.2	GENCODE	506	chr2	-	144053154	144329674	TTGTTCTCAGCTTCCTTCTCCCCTGACATTCTCAGTACCTCTCTATTCATGAAATCCTAC	intronic antisense	NM_018460	ARHGAP15	rho GTPase-activating protein 15	+	143886898	144525921	6.50288	7.9311
ASHGA5P047368	0.00758875	0.0431256	2.69074	down	noncoding	NR_024497	LOC399744	RefSeq	5270	chr10	+	38717073	38741081	ATTACTGGCTCAATGTAATGGCTCCATCTCAGGAACAGCCAATGAAAGAGATGCACAGGA	intergenic							3.34714	4.77514
ASHGA5P035194	0.00477938	0.0390427	2.68911	down	noncoding	ENST00000428188	AC007271.3	GENCODE	382	chr2	-	102789080	102798568	GAGAGAGAGAGTAAATAAACTTGTGTAAGTTAATTGCATCAACTACAAATAAGACCTGTA	natural antisense	NM_000877	IL1R1	interleukin-1 receptor type 1 precursor	+	102770401	102796334	3.68783	5.11496
ASHGA5P029622	0.0183313	0.0635555	2.68319	down	noncoding	TCONS_00008291	XLOC_003741	LincRNAs identified by Cabili et al	221	chr4	+	153602154	153602597	TAGTGTTGAGGCATCAGACACATCTCATCTCTAAACCTTTCCCTGCAGATCACCATCTGA	intergenic							3.73095	5.1549
ASHGA5P058521	0.0269268	0.0793013	2.68263	down	noncoding	uc009vpu.2	LOC339505	UCSC_knowngene	2756	chr1	-	20686293	20732187	AGTTTCTCCTCCTCACAGACTGGATGATGAGAGGCACAGCTGAGTCCGGAGCAGACTGAG	intergenic							4.14694	5.57059
ASHGA5P028361	0.00723365	0.0425919	2.68199	down	noncoding	uc021ogr.1	BC036435	UCSC_knowngene	1579	chr1	-	16860349	16862144	CTCGAGAGTGTCTCTCTCATTAAAAGCTCCACCAAATATTTGAAATATCTCAACCAGAAA	bidirectional	ENST00000357301	AL355149.1		+	16862254	16864669	3.19181	4.61512
ASHGA5P047069	0.00753552	0.0429716	2.67784	down	noncoding	ENST00000429680	RP11-78C6.1	GENCODE	450	chr10	-	107249353	107262113	CCCTTGTTGCCACAATAGTCCCTCTTTGTTTGAACTACTACAAGAATAAAGAAATTTCTT	intergenic							4.67467	6.09574
ASHGA5P019782	0.0175718	0.0617961	2.67397	down	noncoding	NR_045218	TRIM41	RefSeq	2721	chr5	+	180650262	180662808	GCTGCTCCAGGTGTGAAGAGGTACAGCTGCAGCCCCCAGAGGTCTGGTCCCCTGACCCGT	exon sense-overlapping	NM_033549	TRIM41	E3 ubiquitin-protein ligase TRIM41 isoform 1	+	180650262	180662808	5.03957	6.45855
ASHGA5P019782	0.0175718	0.0617961	2.67397	down	noncoding	NR_045218	TRIM41	RefSeq	2721	chr5	+	180650262	180662808	GCTGCTCCAGGTGTGAAGAGGTACAGCTGCAGCCCCCAGAGGTCTGGTCCCCTGACCCGT	exon sense-overlapping	NM_201627	TRIM41	E3 ubiquitin-protein ligase TRIM41 isoform 2	+	180650262	180662808	5.03957	6.45855
ASHGA5P032901	0.0454081	0.110652	2.67077	down	noncoding	ENST00000577684	RP1-37N7.3	GENCODE	1871	chr17	+	18314472	18317694	AGCACGGGTTCCTGTGGCGGCAGCTTTTCCTTCCATCTCCTTCTCTCCACCCGCTGGCTT	intergenic							7.10902	8.52628
ASHGA5P051763	0.00190762	0.0307017	2.66489	down	noncoding	NR_001566	TERC	RefSeq	451	chr3	-	169482397	169482848	TTGCGGAGGGTGGGCCTGGGAGGGGTGGTGGCCATTTTTTGTCTAACCCTAACTGAGAAG	intergenic							4.997	6.41107
ASHGA5P020823	0.000944307	0.0254257	2.66331	down	noncoding	ENST00000520375	RP11-213G6.2	GENCODE	443	chr8	-	23583843	23600555	CCCAGCCCTTTCACCAAGCTGTGAAGAAGCCAAGCAGTTCTCATGGAAAAACCACATATA	intergenic							7.564	8.97722
ASHGA5P020627	0.00767742	0.0433457	2.658	down	noncoding	ENST00000517725	RP11-366K18.3	GENCODE	259	chr8	+	67104349	67105532	TGAGTGAGTGAGGGGCTCTTAGATCTTCGGCCACAGACTGAAGGCTGCACTGTCAGCTTC	intergenic							4.00808	5.41842
ASHGA5P037779	0.0112575	0.0491399	2.65586	down	noncoding	uc002zlk.3	P712P	UCSC_knowngene	2566	chr22	+	16274557	16278600	TCTTTTGTGATCAAAAATTCCTTACTTTTAGTTTTTTATCTATGGTAGAACCACCCAGAG	natural antisense	NM_001136213	POTEH	POTE ankyrin domain family member H	-	16256331	16287937	3.50336	4.91254
ASHGA5P028276	0.00159732	0.0287561	2.6523	down	noncoding	ENST00000548368	RP1-46F2.2	GENCODE	705	chr12	+	111374392	111381499	TGGGATTCTTCCCTCTCCAGCCAGGACCACATCTGTGCTTTTCTGTAATTGTGTAAAAAA	intergenic							4.70972	6.11696
ASHGA5P045189	0.00448021	0.0386604	2.65009	down	noncoding	ENST00000423963	RP11-443B7.2	GENCODE	423	chr1	+	235092977	235095736	GGTTGGAGTGCTACTTAAAATAATTTTGCCAAATGTTCCATCTCTCTGTGTTGATGAATA	intergenic							3.4021	4.80813
ASHGA5P052321	0.00940339	0.0459019	2.64446	down	noncoding	ENST00000511014	LINC00461	GENCODE	1664	chr5	-	87962138	87980753	CTCTCCTCTGAATAAGCAAGCTTTTGCCTCTAAAAGTCACAAGTAATCCTCGTGTGTGAC	intergenic							3.30772	4.71069
ASHGA5P022816	0.00740321	0.042729	2.63939	down	noncoding	ENST00000566781	RP13-98N21.3	GENCODE	408	chr15	+	82591193	82597197	TGGGGTGCAAGGTGGCTGGCCTGTTTCACGACCCCAGCATTGGGAACCCCATCCACATGA	intergenic							5.12065	6.52086
ASHGA5P048162	0.000749782	0.02304	2.63929	down	noncoding	NR_026882	DKFZP434K028	RefSeq	936	chr11	-	61521500	61525136	CTTGGTTCCCTGCCCTGTAGCCCTGATAGGTTCACACATGAAGGGAAGGTTCTCAATGCA	intronic antisense	NM_001127392	C11orf9	myelin gene regulatory factor isoform 2	+	61520120	61555989	6.4062	7.80635
ASHGA5P048162	0.000749782	0.02304	2.63929	down	noncoding	NR_026882	DKFZP434K028	RefSeq	936	chr11	-	61521500	61525136	CTTGGTTCCCTGCCCTGTAGCCCTGATAGGTTCACACATGAAGGGAAGGTTCTCAATGCA	intronic antisense	NM_013279	C11orf9	myelin gene regulatory factor isoform 1	+	61522860	61555989	6.4062	7.80635
ASHGA5P028511	0.000115557	0.0127748	2.63816	down	noncoding	NR_033877	LINC00548	RefSeq	2551	chr13	-	40768645	40794639	GAGGAGGAGGATTGGCCCGGCTGCTGAAAACATACGTGTAATTGAAGGAATTCTATTAAG	intergenic							3.14735	4.54688
ASHGA5P036736	0.00240211	0.0328146	2.63659	down	noncoding	ENST00000423074	RP4-553F4.6	GENCODE	464	chr20	-	32375178	32380833	ACGGAAATGCTGGTCCCTACAATAGAATGCTCTGTGGTCATTAAAAAGATTAAAAAGGTC	intronic antisense	NM_032819	ZNF341	zinc finger protein 341	+	32319807	32380075	4.07547	5.47415
ASHGA5P054975	0.0256577	0.0767899	2.63552	down	noncoding	TCONS_00010599	XLOC_004244	LincRNAs identified by Cabili et al	690	chr5	+	1046023	1046915	AGTGTGAATGGGTGTGTGAACGAGTGGGTTAGTGTGTGAATGAGTGGGTTAGTGTGTGAG	intergenic							3.99964	5.39772
ASHGA5P027647	0.00779691	0.0433457	2.6344	down	noncoding	ENST00000536910	RP11-87C12.4	GENCODE	434	chr12	-	122337853	122338900	AAATGAGCCCCAAGAAGAGATCCTCTCCCTCTCTTGGGACATTTATCATCTTCTGTCACT	intronic antisense	NM_001261400	PSMD9	26S proteasome non-ATPase regulatory subunit 9 isoform 2	+	122326636	122355771	5.88839	7.28587
ASHGA5P027647	0.00779691	0.0433457	2.6344	down	noncoding	ENST00000536910	RP11-87C12.4	GENCODE	434	chr12	-	122337853	122338900	AAATGAGCCCCAAGAAGAGATCCTCTCCCTCTCTTGGGACATTTATCATCTTCTGTCACT	intronic antisense	NM_002813	PSMD9	26S proteasome non-ATPase regulatory subunit 9 isoform 1	+	122326636	122355771	5.88839	7.28587
ASHGA5P044668	0.00185199	0.0301717	2.6279	down	noncoding	ENST00000521055	RP11-13N12.2	GENCODE	458	chr8	+	16461763	16522388	CCAGAAATATTCTCATTCCTTGCCCTTCAACATTCTTCAATTTGATTAAAAGACCTCCAA	intergenic							5.12964	6.52355
ASHGA5P023839	0.00056364	0.0204629	2.62643	down	noncoding	HMlincRNA634-	HMlincRNA634	LincRNAs identified by Khalil et al	19260	chr3	-	194764334	194783594	ATCCCTGCCCTTGTTCCTTACAGACCCGATGAGAATTTGTGTTGCATATCCAGGAACAAA	intergenic							7.14332	8.53642
ASHGA5P029305	0.0363447	0.09622	2.62502	down	noncoding	uc001yab.3	AX721199	UCSC_knowngene	702	chr14	-	92511118	92516990	AACCAGCTTGCAGCTGATAGTTATTTTTTGTCTTTTTTCCTGTTCTATCCACTGTCCTAG	intergenic							4.53259	5.92492
ASHGA5P040177	0.0069283	0.0420215	2.62315	down	noncoding	ENST00000421640	BX004987.5	GENCODE	736	chr1	+	143391567	143394444	CCCTGGAGCTCTCATTTTCAAGAGATATCCATTTGCTAACTTTATTCAATAAATGTGACT	intergenic							3.57343	4.96473
ASHGA5P055876	0.000166481	0.0135265	2.62309	down	noncoding	ENST00000548475	AL589743.1	GENCODE	640	chr14	+	19650060	19691701	ATACTGGTGCTTTTGGGTAGAAACCCTCATCCATATCCTGGTAAGGCTTGAAGTTGCACA	intergenic							2.72843	4.1197
ASHGA5P030959	0.00326916	0.0360585	2.6224	down	noncoding	ENST00000577041	BCAR4	GENCODE	378	chr16	-	11914007	11922668	GAATGTCTGCTTGTCACCTGCTTAGGGTTATCGACTGTGATTCTGGGACTCATTGTTGTT	intergenic							4.71277	6.10366
ASHGA5P015300	0.0470917	0.11314	2.62203	down	noncoding	NR_046479	FKBP14	RefSeq	4934	chr7	-	30050198	30066417	CTCCTTATTTCACTCCACGTAAAATTCCCCCAGAAAGTACACTGATATTTAATATTGATC	exon sense-overlapping	NM_017946	FKBP14	peptidyl-prolyl cis-trans isomerase FKBP14 precursor	-	30050198	30066417	5.94224	7.33292
ASHGA5P032306	0.00781267	0.0433457	2.61789	down	noncoding	ENST00000584779	AC010761.6	GENCODE	442	chr17	-	27059980	27069783	TTTTCTAACTGGGCTAGGGGAAAGGGTAGGGTCTGTGTGGAGCTACAGCTGCCTTCAGCC	natural antisense	NM_178170	NEK8	serine/threonine-protein kinase Nek8	+	27055831	27069784	3.84367	5.23207
ASHGA5P043147	6.99846e-05	0.0112092	2.61785	down	noncoding	uc003ucq.3	PMS2L2	UCSC_knowngene	1178	chr7	-	74952890	74988229	AAGTGAAGAAAAGAGTAGTCAGTGCCCAACATCATGGATCTCTCACTGAACACACCATGC	intergenic							3.3328	4.72118
ASHGA5P058579	0.00275274	0.0343967	2.61708	down	noncoding	uc010mpn.1	PCA3	UCSC_knowngene	3600	chr9	+	79379353	79402465	GATGATACAGAGCCCCTTTAAATATCCACACACACAGGAAGCACAAAAGGAAGCACAGAG	intronic antisense	NM_015225	PRUNE2	protein prune homolog 2	-	79226291	79521003	4.83693	6.22488
ASHGA5P040806	0.00154832	0.0285908	2.61663	down	noncoding	NR_046135	FAM91A2	RefSeq	1205	chr1	+	149576261	149672733	ATGACTTGGCTTGGCCTCTCTCTTAGTTATTCACAGCTCAGCCCGATAGGCACCTCCGGG	intergenic							5.72406	7.11177
ASHGA5P034556	0.00016769	0.0135265	2.61429	down	noncoding	TCONS_00004747	XLOC_001426	LincRNAs identified by Cabili et al	558	chr2	+	35041548	35042319	TATGTAGACCCACACACACACAGTGTGTATGTAGACCCACACACACACAGTGTGTATGTA	intergenic							4.89661	6.28303
ASHGA5P054917	0.0409132	0.103529	2.61034	down	noncoding	ENST00000537024	SNHG1	GENCODE	532	chr11	-	62621018	62622951	AAGTAGGCAGTTTCTATGATGAATCAAACTAGCTCACTATGACCGACAGTGAAAATACAT	bidirectional	NM_001012662	SLC3A2	4F2 cell-surface antigen heavy chain isoform b	+	62623483	62656355	5.47868	6.86292
ASHGA5P054917	0.0409132	0.103529	2.61034	down	noncoding	ENST00000537024	SNHG1	GENCODE	532	chr11	-	62621018	62622951	AAGTAGGCAGTTTCTATGATGAATCAAACTAGCTCACTATGACCGACAGTGAAAATACAT	bidirectional	NM_001012664	SLC3A2	4F2 cell-surface antigen heavy chain isoform e	+	62623483	62656355	5.47868	6.86292
ASHGA5P054917	0.0409132	0.103529	2.61034	down	noncoding	ENST00000537024	SNHG1	GENCODE	532	chr11	-	62621018	62622951	AAGTAGGCAGTTTCTATGATGAATCAAACTAGCTCACTATGACCGACAGTGAAAATACAT	bidirectional	NM_002394	SLC3A2	4F2 cell-surface antigen heavy chain isoform c	+	62623483	62656355	5.47868	6.86292
ASHGA5P030854	0.0312533	0.0870919	2.61013	down	noncoding	ENST00000563223	LA16c-390E6.3	GENCODE	307	chr16	-	1517673	1522685	GGTTTCCTGTCTGTCTTTGCAAATAGAAGAGTTGATTTTTTGGGAAATAATCTGTTGATC	intron sense-overlapping	NM_001114331	CLCN7	H(+)/Cl(-) exchange transporter 7 isoform b	-	1494933	1525085	3.1791	4.56322
ASHGA5P030854	0.0312533	0.0870919	2.61013	down	noncoding	ENST00000563223	LA16c-390E6.3	GENCODE	307	chr16	-	1517673	1522685	GGTTTCCTGTCTGTCTTTGCAAATAGAAGAGTTGATTTTTTGGGAAATAATCTGTTGATC	intron sense-overlapping	NM_001287	CLCN7	H(+)/Cl(-) exchange transporter 7 isoform a	-	1494933	1525085	3.1791	4.56322
ASHGA5P032904	0.0172148	0.0611427	2.60909	down	noncoding	ENST00000584135	KRT16P1	GENCODE	563	chr17	+	18343221	18344613	ATGCTCTTAGCCTTCCTGAGCACCTTCCCTTTTTTCAGCCAACTGCTCGCTCGCTCACCT	intergenic							5.95521	7.33875
ASHGA5P047709	0.0186436	0.0640863	2.60499	down	noncoding	ENST00000420773	RP11-258A12.3	GENCODE	1952	chr10	+	114843552	114846535	ACGCACAAATCCATTCCCTCTTGCTGTGGAGGAGAAAATACATGAAAATCTGAATCCATA	intron sense-overlapping	NM_001146274	TCF7L2	transcription factor 7-like 2 isoform 1	+	114710008	114927436	4.05768	5.43896
ASHGA5P047709	0.0186436	0.0640863	2.60499	down	noncoding	ENST00000420773	RP11-258A12.3	GENCODE	1952	chr10	+	114843552	114846535	ACGCACAAATCCATTCCCTCTTGCTGTGGAGGAGAAAATACATGAAAATCTGAATCCATA	intron sense-overlapping	NM_001146283	TCF7L2	transcription factor 7-like 2 isoform 3	+	114710008	114927436	4.05768	5.43896
ASHGA5P047709	0.0186436	0.0640863	2.60499	down	noncoding	ENST00000420773	RP11-258A12.3	GENCODE	1952	chr10	+	114843552	114846535	ACGCACAAATCCATTCCCTCTTGCTGTGGAGGAGAAAATACATGAAAATCTGAATCCATA	intron sense-overlapping	NM_001146284	TCF7L2	transcription factor 7-like 2 isoform 4	+	114710008	114927436	4.05768	5.43896
ASHGA5P047709	0.0186436	0.0640863	2.60499	down	noncoding	ENST00000420773	RP11-258A12.3	GENCODE	1952	chr10	+	114843552	114846535	ACGCACAAATCCATTCCCTCTTGCTGTGGAGGAGAAAATACATGAAAATCTGAATCCATA	intron sense-overlapping	NM_001146285	TCF7L2	transcription factor 7-like 2 isoform 5	+	114710008	114927436	4.05768	5.43896
ASHGA5P047709	0.0186436	0.0640863	2.60499	down	noncoding	ENST00000420773	RP11-258A12.3	GENCODE	1952	chr10	+	114843552	114846535	ACGCACAAATCCATTCCCTCTTGCTGTGGAGGAGAAAATACATGAAAATCTGAATCCATA	intron sense-overlapping	NM_001146286	TCF7L2	transcription factor 7-like 2 isoform 6	+	114710008	114927436	4.05768	5.43896
ASHGA5P047709	0.0186436	0.0640863	2.60499	down	noncoding	ENST00000420773	RP11-258A12.3	GENCODE	1952	chr10	+	114843552	114846535	ACGCACAAATCCATTCCCTCTTGCTGTGGAGGAGAAAATACATGAAAATCTGAATCCATA	intron sense-overlapping	NM_001198525	TCF7L2	transcription factor 7-like 2 isoform 7	+	114710008	114927436	4.05768	5.43896
ASHGA5P047709	0.0186436	0.0640863	2.60499	down	noncoding	ENST00000420773	RP11-258A12.3	GENCODE	1952	chr10	+	114843552	114846535	ACGCACAAATCCATTCCCTCTTGCTGTGGAGGAGAAAATACATGAAAATCTGAATCCATA	intron sense-overlapping	NM_001198526	TCF7L2	transcription factor 7-like 2 isoform 8	+	114710008	114927436	4.05768	5.43896
ASHGA5P047709	0.0186436	0.0640863	2.60499	down	noncoding	ENST00000420773	RP11-258A12.3	GENCODE	1952	chr10	+	114843552	114846535	ACGCACAAATCCATTCCCTCTTGCTGTGGAGGAGAAAATACATGAAAATCTGAATCCATA	intron sense-overlapping	NM_001198527	TCF7L2	transcription factor 7-like 2 isoform 9	+	114710008	114927436	4.05768	5.43896
ASHGA5P047709	0.0186436	0.0640863	2.60499	down	noncoding	ENST00000420773	RP11-258A12.3	GENCODE	1952	chr10	+	114843552	114846535	ACGCACAAATCCATTCCCTCTTGCTGTGGAGGAGAAAATACATGAAAATCTGAATCCATA	intron sense-overlapping	NM_001198528	TCF7L2	transcription factor 7-like 2 isoform 10	+	114710008	114927436	4.05768	5.43896
ASHGA5P047709	0.0186436	0.0640863	2.60499	down	noncoding	ENST00000420773	RP11-258A12.3	GENCODE	1952	chr10	+	114843552	114846535	ACGCACAAATCCATTCCCTCTTGCTGTGGAGGAGAAAATACATGAAAATCTGAATCCATA	intron sense-overlapping	NM_001198529	TCF7L2	transcription factor 7-like 2 isoform 11	+	114710008	114927436	4.05768	5.43896
ASHGA5P047709	0.0186436	0.0640863	2.60499	down	noncoding	ENST00000420773	RP11-258A12.3	GENCODE	1952	chr10	+	114843552	114846535	ACGCACAAATCCATTCCCTCTTGCTGTGGAGGAGAAAATACATGAAAATCTGAATCCATA	intron sense-overlapping	NM_001198530	TCF7L2	transcription factor 7-like 2 isoform 12	+	114710008	114927436	4.05768	5.43896
ASHGA5P047709	0.0186436	0.0640863	2.60499	down	noncoding	ENST00000420773	RP11-258A12.3	GENCODE	1952	chr10	+	114843552	114846535	ACGCACAAATCCATTCCCTCTTGCTGTGGAGGAGAAAATACATGAAAATCTGAATCCATA	intron sense-overlapping	NM_001198531	TCF7L2	transcription factor 7-like 2 isoform 13	+	114710008	114927436	4.05768	5.43896
ASHGA5P047709	0.0186436	0.0640863	2.60499	down	noncoding	ENST00000420773	RP11-258A12.3	GENCODE	1952	chr10	+	114843552	114846535	ACGCACAAATCCATTCCCTCTTGCTGTGGAGGAGAAAATACATGAAAATCTGAATCCATA	intron sense-overlapping	NM_030756	TCF7L2	transcription factor 7-like 2 isoform 2	+	114710008	114927436	4.05768	5.43896
ASHGA5P041900	0.0186563	0.0640863	2.60151	down	noncoding	ENST00000413945	LINC00472	GENCODE	662	chr6	-	72054046	72129806	CCACCCCATCCCCTTATTGAACAATTACGATGCCTATAAATATTGTATTGAGAAAGAAAA	intergenic							9.32978	10.7091
ASHGA5P031714	0.00016498	0.0135265	2.59671	down	noncoding	uc021thd.1	IGH	UCSC_knowngene	138	chr16	+	33020652	33020790	ACTGTCCTGTCCAGCCTCTGGATTCACCTTCAGTAACCACTACATGAGCTGGGTCCGCCA	intergenic							4.87526	6.25194
ASHGA5P035272	0.00346924	0.0361534	2.58722	down	noncoding	ENST00000441053	AC067960.1	GENCODE	812	chr2	-	121839012	121846302	AATATCCCTTTCCCATTCAGCAACTGTGCAACACCTGACTTCAGAAACAGACGTCTAGAG	intergenic							4.10101	5.47241
ASHGA5P033212	0.00785086	0.0434009	2.58717	down	noncoding	ENST00000511627	RP1-117B12.4	GENCODE	715	chr17	+	48473798	48475249	CCTGTCCTCTACTTAACCCCCGAATAACCATCATGGGGAAAACTCTTCTTCCTGAATTTC	natural antisense	NM_018509	LRRC59	leucine-rich repeat-containing protein 59	-	48458593	48474914	6.72324	8.09461
ASHGA5P044889	0.00276232	0.0343967	2.58478	down	noncoding	ENST00000520603	RP11-91P17.1	GENCODE	508	chr8	+	79064556	79066148	TACGAATCCTTCCTACCCATCCCCTGTAGTGGAATGCATTCGCTCTAAATCATGATGTTC	intergenic							6.96787	8.33791
ASHGA5P031411	0.0104195	0.0476341	2.58297	down	noncoding	ENST00000565310	RP11-104N10.1	GENCODE	405	chr16	-	89558810	89560201	TCTCTACTCCATCTGCACTGCTGTCTCTGTGCGTTCATCATCTCACAGCCATCCTTTCAT	intergenic							4.71838	6.08741
ASHGA5P057038	0.0367362	0.0969818	2.58245	down	noncoding	TCONS_00012219	XLOC_005778	LincRNAs identified by Cabili et al	208	chr6	-	86354448	86356991	TAAGATGTGAGAGATAGTGCCCCACCGCGCCCGGCCAATTTTTATTCTTGTTTAATCCAT	intergenic							7.75002	9.11876
ASHGA5P039517	0.0261481	0.0777779	2.57557	down	noncoding	ENST00000515150	EMCN-IT1	GENCODE	481	chr4	-	101733411	101735437	ACTCCACCACCTTTGTGATACTCTACAGAAATTATAATATGGTTAGAGAAGGAGAAGATA	intergenic							4.85901	6.2239
ASHGA5P015898	0.0226672	0.0717768	2.57392	down	noncoding	ENST00000424523	AC002454.1	GENCODE	406	chr7	+	92484222	92546465	CCACAGCACACACTGCAAGCTATTTGGCATATGAAGGTCTTGACCTGAGAAAACCATCTT	intergenic							3.86587	5.22984
ASHGA5P041073	0.00619909	0.0409468	2.57378	down	noncoding	ENST00000512498	RP11-159F24.6	GENCODE	572	chr5	+	43511159	43521913	CTCCTGCAACTGTCTGGAATTTCTTCTCTCTCCAATCCATCTCTAGTATTGATGACATAG	intronic antisense	NM_198566	C5orf34	uncharacterized protein C5orf34	-	43486802	43515273	4.82581	6.1897
ASHGA5P039297	0.0470559	0.113113	2.57019	down	noncoding	TCONS_00024147	XLOC_011515	LincRNAs identified by Cabili et al	684	chr15	-	68775546	68777423	GCCTGCCTCTCCTGCCCTGTGGTGTTGCTGTCCTCATATGACCCTTCAGTCCCCCGACAT	intergenic							9.94376	11.3056
ASHGA5P020870	0.0204689	0.0678934	2.56956	down	noncoding	ENST00000521149	RP11-981G7.4	GENCODE	577	chr8	-	10340433	10375525	AGTCCAGAATGAGTAGAATCCTGTTTCCTTCTGAAGCCCTTCCTAATTGATATACTTAGG	intergenic							7.09457	8.45609
ASHGA5P057024	0.00199888	0.0310297	2.56719	down	noncoding	TCONS_00012054	XLOC_005586	LincRNAs identified by Cabili et al	281	chr6	-	3925561	3926428	CTGCCTGCTGCCACACTTTTAAGTTGAGAAAAGGTGCTGTTCCTACAACACAGATCAAGC	intergenic							5.22746	6.58765
ASHGA5P034123	0.00696527	0.0420608	2.56701	down	noncoding	uc002npz.3	CR627135	UCSC_knowngene	4676	chr19	-	21634855	21646686	GTGGCCTGTCTGCCTGCAAACACATAAGACTTTTAGTTTTGATTTACATAGAGTTAAATA	intergenic							5.67672	7.03681
ASHGA5P044237	0.0161433	0.0592114	2.56694	down	noncoding	ENST00000521470	RP11-231D20.2	GENCODE	388	chr8	-	42106569	42120924	GGGACACCCTGCCTGCTCTACAATTGGGATCCCTGGAAAAGTGACAGAATCTGGCAACAG	intergenic							6.95505	8.31509
ASHGA5P036778	0.00164822	0.0292275	2.5663	down	noncoding	ENST00000439232	SNORA71B	GENCODE	136	chr20	-	37053842	37053978	CGCTTCCCCGTGTTTGAAGGGTCCACTCCTATCCCTTCCAAACTCTGGAGCTTTCGTACA	intergenic							6.60411	7.9638
ASHGA5P017534	0.00554667	0.0401563	2.56072	down	noncoding	ENST00000442794	AC096558.1	GENCODE	561	chr2	-	144072002	144238350	GCCTGCCTGGCAATCTGTTTTTTATGAAGTTTCATTTATCTTTGAGCATCTTATTAACTG	intronic antisense	NM_018460	ARHGAP15	rho GTPase-activating protein 15	+	143886898	144525921	4.25251	5.60906
ASHGA5P041187	0.000854814	0.0244032	2.55968	down	noncoding	ENST00000508401	CTC-564N23.3	GENCODE	582	chr5	+	76414146	76462734	AGGAAAAGAAGAAAATGCTGAGTGTGTGGGTGGAACATCTAACCTCTTCGGACGTACAAG	intergenic							4.77286	6.12882
ASHGA5P057750	0.00411166	0.0377672	2.55935	down	noncoding	TCONS_00021761	XLOC_010355	LincRNAs identified by Cabili et al	338	chr13	+	40637746	40638543	CACACCCAGAGACCCTCCTCTTCCATATAAAATTAAATATAGACATCAAGATCTAAATGT	intergenic							6.83073	8.1865
ASHGA5P017461	0.000347913	0.0165366	2.55715	down	noncoding	ENST00000441907	RP11-446F3.2	GENCODE	764	chr10	-	2488446	2489546	AAAGGCATGCAGGGAATCCCATCCAGCGTCCCTCTACTCTCCTCTGCAGCTTCCATGGTT	intergenic							6.17497	7.52951
ASHGA5P034977	0.0308695	0.0864139	2.55672	down	noncoding	TCONS_00004741	XLOC_001414	LincRNAs identified by Cabili et al	539	chr2	+	31055131	31058199	GGAACTTCTGTTCTTACCCCTGTCCTTCCCTTCACCTTTTATAGTTACTAAATGCAATGT	intergenic							7.99326	9.34755
ASHGA5P022350	0.00842749	0.0441534	2.55552	down	noncoding	ENST00000555016	RP11-203M5.6	GENCODE	354	chr14	+	20906827	20908933	ATCAAGGCTGGCTCCTGTATGATTCAACGTGCTTCCGAAAATAGGACTGACATGGGTGTG	intergenic							4.35992	5.71354
ASHGA5P019752	0.0168954	0.0605576	2.55539	down	noncoding	ENST00000502494	RP11-58B2.1	GENCODE	527	chr5	+	101836244	101841372	GCACTCCACCAATATAGGTAGAAATTCAGAAATTCAGTGTGTAAAATGGTAAAGTGGATT	intergenic							3.60453	4.95808
ASHGA5P016407	0.00212773	0.0314014	2.5525	down	noncoding	ENST00000430128	AC018712.3	GENCODE	592	chr2	-	173541868	173543755	ATGAACTCCACTCAGGGTAAGCCTGCCTTGTTCCTGGAGCCCTCTTCCTCTGGCTGCAAT	intergenic							6.59403	7.94594
ASHGA5P015038	1.21901e-06	0.00374683	2.55092	down	noncoding	ENST00000415918	AC078851.1	GENCODE	298	chr2	-	140582464	140583446	CTCTCCTGCTGGTCCAGATTTTTATTCAATACTTCTGGTGTTCAACTAAAGAAACTATTT	intergenic							2.95154	4.30256
ASHGA5P036066	0.0154784	0.057714	2.54967	down	noncoding	ENST00000562665	RP11-1223D19.1	GENCODE	814	chr2	+	110992311	111023767	CAAAATGAGAAGAAAAAGTCCCTTTCCCTTCATGCCTCTACTTCCTGCTGTATTCTCAAA	intergenic							5.87726	7.22757
ASHGA5P053552	0.000168696	0.0135265	2.54795	down	noncoding	NR_027321	LOC157381	RefSeq	3595	chr8	+	125954249	125963337	AAGAGCTATTGCCAATTTCCACCCTCTCTCTGGAAACTGTCATTAGGGTTAGGGAAACTG	intergenic							5.73397	7.08331
ASHGA5P034214	0.00581929	0.0403622	2.54634	down	noncoding	uc001agf.1	AK094692	UCSC_knowngene	1048	chr1	+	1535818	1543166	TTCTGGGACTTCCCCTTCTCCTTTGGTGCAAAGTTACACTAACTGTCATGATGTTGTTGA	bidirectional	NM_001242659	C1orf233	fibronectin type-III domain-containing transmembrane protein C1orf233 precursor	-	1533387	1535476	6.38341	7.73184
ASHGA5P035976	0.008931	0.0449705	2.54374	down	noncoding	TCONS_00016340	XLOC_007720	LincRNAs identified by Cabili et al	719	chr9	-	70958613	70966054	CCAAGTACACCATCTCTCTCTTACCAAACCAAAGCTATTGCATGTGCATTCTGGGAGAAA	intergenic							3.59002	4.93697
ASHGA5P033449	0.00344584	0.0361534	2.54296	down	noncoding	ENST00000573207	RP11-1197K16.2	GENCODE	380	chr17	+	80936596	80939610	AGTTTCTCAGAATGCCCTTCTCAGTACGAATCCAGTTGAGTCTAGAGACAAGGAGGAAGA	intronic antisense	NM_001009905	B3GNTL1	UDP-GlcNAc:betaGal beta-1,3-N-acetylglucosaminyltransferase-like protein 1	-	80901666	81009686	3.47885	4.82536
ASHGA5P041742	0.00140341	0.0278665	2.54206	down	noncoding	ENST00000437417	ZNRD1-AS1	GENCODE	1497	chr6	-	29987546	30029417	AGCTCTGTCTCCTCAGCACATGTTCTAGGCTCTGACTGCAAGTGCTGACTTGGGCTCCCA	natural antisense	NM_014596	ZNRD1	DNA-directed RNA polymerase I subunit RPA12	+	30029035	30032686	4.32417	5.67016
ASHGA5P041742	0.00140341	0.0278665	2.54206	down	noncoding	ENST00000437417	ZNRD1-AS1	GENCODE	1497	chr6	-	29987546	30029417	AGCTCTGTCTCCTCAGCACATGTTCTAGGCTCTGACTGCAAGTGCTGACTTGGGCTCCCA	natural antisense	NM_170783	ZNRD1	DNA-directed RNA polymerase I subunit RPA12	+	30029035	30032686	4.32417	5.67016
ASHGA5P058551	0.0146108	0.0559771	2.54067	down	noncoding	uc010gqq.3	TPTEP1	UCSC_knowngene	1055	chr22	+	17082800	17096000	CCCCTGGACCATCACAGAAGCCGAGCTTCGGGTAACTCTCACAGTGGAGGAAGGCAGGAA	intergenic							5.46497	6.81017
ASHGA5P042838	0.00173185	0.0294095	2.53938	down	noncoding	TCONS_00019804	XLOC_009603	LincRNAs identified by Cabili et al	873	chr11	-	130086479	130087479	CATCCTTTCCCTTGGCTCATTCAAGTAAGCTTGTTACCCATTCTTTTGCAACAGAGTCAC	intergenic							8.95577	10.3002
ASHGA5P042940	0.0416916	0.10478	2.53882	down	noncoding	ENST00000439839	AC004485.3	GENCODE	527	chr7	-	24236280	24295338	GCTCCCCCTCTCTGTGTATTGGTCAATCACTGTCTGATCATACTGTACTGAAATTAATTC	intergenic							9.52113	10.8653
ASHGA5P042877	0.00476414	0.0390427	2.53632	down	noncoding	ENST00000420313	GRIFIN	GENCODE	579	chr7	-	2514359	2516017	GGTCTGTGGTCCTGTGTGCTCCTCGCAGCTCCACCTTCAATAAACTCTGAGAAGGCTGCA	intergenic							6.23984	7.58258
ASHGA5P023164	0.0024821	0.0333887	2.53434	down	noncoding	ENST00000573268	RP11-95P2.1	GENCODE	694	chr16	-	4296566	4303780	GCCCAGAACGCATCTCCCGTGTCCCTCACAGCAGTTCTATGAGGCTGGCTGCCCTGTTTG	intergenic							6.37626	7.71787
ASHGA5P045724	0.0041097	0.0377672	2.5309	down	noncoding	ENST00000450779	RP11-95K23.5	GENCODE	1126	chr9	+	41285356	41287306	CAGTGCCAAGAGTTATAAGAACAACTGCTTTATTTCACTCCTATCTCTGTGAATACAAAA	intergenic							3.02618	4.36583
ASHGA5P038910	0.0326004	0.0892987	2.53004	down	noncoding	ENST00000502999	RP11-227H4.5	GENCODE	388	chr3	+	98241413	98244178	TTCATTGGGCTGTGAACAGAAAGTCCTTGATTTCCTCAATTTTCGGAGGCATGGCGACAA	intronic antisense	NM_001040181	CLDND1	claudin domain-containing protein 1 isoform a	-	98234316	98241910	4.62653	5.96569
ASHGA5P038910	0.0326004	0.0892987	2.53004	down	noncoding	ENST00000502999	RP11-227H4.5	GENCODE	388	chr3	+	98241413	98244178	TTCATTGGGCTGTGAACAGAAAGTCCTTGATTTCCTCAATTTTCGGAGGCATGGCGACAA	intronic antisense	NM_001040182	CLDND1	claudin domain-containing protein 1 isoform b	-	98234316	98241910	4.62653	5.96569
ASHGA5P038910	0.0326004	0.0892987	2.53004	down	noncoding	ENST00000502999	RP11-227H4.5	GENCODE	388	chr3	+	98241413	98244178	TTCATTGGGCTGTGAACAGAAAGTCCTTGATTTCCTCAATTTTCGGAGGCATGGCGACAA	intronic antisense	NM_001040183	CLDND1	claudin domain-containing protein 1 isoform a	-	98234316	98241910	4.62653	5.96569
ASHGA5P038910	0.0326004	0.0892987	2.53004	down	noncoding	ENST00000502999	RP11-227H4.5	GENCODE	388	chr3	+	98241413	98244178	TTCATTGGGCTGTGAACAGAAAGTCCTTGATTTCCTCAATTTTCGGAGGCATGGCGACAA	intronic antisense	NM_001040200	CLDND1	claudin domain-containing protein 1 isoform d	-	98234316	98241910	4.62653	5.96569
ASHGA5P038910	0.0326004	0.0892987	2.53004	down	noncoding	ENST00000502999	RP11-227H4.5	GENCODE	388	chr3	+	98241413	98244178	TTCATTGGGCTGTGAACAGAAAGTCCTTGATTTCCTCAATTTTCGGAGGCATGGCGACAA	intronic antisense	NM_019895	CLDND1	claudin domain-containing protein 1 isoform a	-	98234316	98241910	4.62653	5.96569
ASHGA5P038910	0.0326004	0.0892987	2.53004	down	noncoding	ENST00000502999	RP11-227H4.5	GENCODE	388	chr3	+	98241413	98244178	TTCATTGGGCTGTGAACAGAAAGTCCTTGATTTCCTCAATTTTCGGAGGCATGGCGACAA	natural antisense	NM_001040199	CLDND1	claudin domain-containing protein 1 isoform a	-	98234316	98241910	4.62653	5.96569
ASHGA5P037383	0.0234712	0.0730928	2.52968	down	noncoding	ENST00000481582	ABCC13	GENCODE	4080	chr21	+	15646200	15672006	CCCTACTTACGTTCTGGTTGTCATGTTTCCCTGTATTTGATAAAACACATAATTTTGAGA	intergenic							3.72288	5.06184
ASHGA5P021709	3.63996e-05	0.00861233	2.52959	down	noncoding	ENST00000538810	RP11-84E24.3	GENCODE	519	chr17	+	70026794	70034889	GCCCTCAAAGCCTCTCTCAATTGCCTTCTCAGCTTGTATGCTTTGAAGAAGCAAGCTGCA	intergenic							3.62218	4.96109
ASHGA5P056795	0.0112558	0.0491399	2.52881	down	noncoding	TCONS_00008726	XLOC_004234	LincRNAs identified by Cabili et al	301	chr4	-	191028241	191030033	ACCAACGGTGTCTACAGGTGTATCCAGCAGCTCTGGAGAGACAGTGACCAGTGAGAATGG	intergenic							2.89402	4.23247
ASHGA5P058234	0.0125314	0.0517906	2.52605	down	noncoding	TCONS_00028410	XLOC_013763	LincRNAs identified by Cabili et al	254	chr20	-	44543294	44544555	AGCACTTCGGGAGGCTGAGGATGAGGAAATTGAAGATCTGAGTGCTTAAGCAAGGGATCA	intergenic							5.60018	6.93706
ASHGA5P023629	0.000390979	0.0175839	2.52588	down	noncoding	HMlincRNA1178-	HMlincRNA1178	LincRNAs identified by Khalil et al	17259	chr7	-	152312201	152329460	TAACTCAAGCGTCACTTAATCATCCATCCCGTGTTCCCACGCACACATTTAGCACTTCAT	intergenic							4.90192	6.23871
ASHGA5P023220	0.0318918	0.0880666	2.52055	down	noncoding	ENST00000574267	RP11-1113L8.1	GENCODE	730	chr17	-	19463423	19501235	CCTCCTCCAGATTTCACATTTCAAGAAAATCCTAGCACTCACCGGTCGGTAGTAAAAATG	natural antisense	NM_018242	SLC47A1	multidrug and toxin extrusion protein 1	+	19437166	19482346	4.34956	5.6833
ASHGA5P044778	0.0182313	0.0633741	2.51837	down	noncoding	TCONS_00001086	XLOC_000329	LincRNAs identified by Cabili et al	626	chr1	+	106993297	106995113	TCTCCTCCCCAAATTTATTTTCTTACAGCTTTGGAGATGGGAATTTTCTGGGGTCCTTTT	intergenic							6.07138	7.40387
ASHGA5P023906	0.0483715	0.115106	2.51448	down	noncoding	HMlincRNA901+	HMlincRNA901	LincRNAs identified by Khalil et al	10599	chr15	+	46971964	46982563	CTCTTAAATCCAGGAAATAAATACTCTCTCTGTTCTCATTCTTTGAAGAATCTTGACAGG	intergenic							3.94271	5.27297
ASHGA5P018440	0.0310521	0.0866713	2.51105	down	noncoding	ENST00000453584	DCUN1D2-AS2	GENCODE	319	chr13	+	114129704	114130450	ACCACAGACGAGCCTCCTCTTCCCTCCGGTGAGGCATGGACAATCAGACTTCTGGGCCAG	intronic antisense	NM_001014283	DCUN1D2	DCN1-like protein 2	-	114110133	114145023	6.80599	8.13427
ASHGA5P043415	0.00571827	0.0402776	2.50885	down	noncoding	ENST00000497366	RP4-584D14.6	GENCODE	420	chr7	-	150076942	150080973	ATCTCCACACCTTCCACATGTAGATATCCTCAACGTTCTTCACAGAGGGGATGCCCGCAC	intronic antisense	NM_173680	ZNF775	zinc finger protein 775	+	150076405	150095719	4.99317	6.3202
ASHGA5P054779	0.00587439	0.0404119	2.50744	down	noncoding	ENST00000445840	RP4-669L17.4	pseudogene	180	chr1	+	334125	334305	TGCAGGACAAGTTCGAGCATCTTAAAATGATTCAACAGGAGGAGATAAGGAAGCTCGAGG								3.71111	5.03733
ASHGA5P034676	0.014368	0.0553183	2.50578	down	noncoding	uc002ped.1	DKFZp434J0226	UCSC_knowngene	1316	chr19	+	46706682	46715832	AAAGATACAGGATCTTCCACACACACAGATCTGACCACATACATCCCCTGCTGGGAATAA	intergenic							4.58076	5.90602
ASHGA5P027926	0.00185121	0.0301717	2.50416	down	noncoding	DR159293		LincRNAs identified by Khalil et al	722	chrX	+	124517281	124517962	GCCTATGCTTTTTCTGCTTCCCTCTGCTTAGTTCTGACAGGGTAAACACAAAGGAAAAAA	intergenic							4.68189	6.00622
ASHGA5P020981	0.0225229	0.0715542	2.50161	down	noncoding	ENST00000523024	RP11-981G7.4	GENCODE	1123	chr8	-	10340387	10405095	AATGGGTATGAGTAGAATCCTGTTTCCTTCTGAAGCCCTTCCTAATTGATATACTTAGGG	intronic antisense	NM_001197020	PRSS55	serine protease 55 isoform 2 precursor	+	10383055	10411676	6.98603	8.30889
ASHGA5P020981	0.0225229	0.0715542	2.50161	down	noncoding	ENST00000523024	RP11-981G7.4	GENCODE	1123	chr8	-	10340387	10405095	AATGGGTATGAGTAGAATCCTGTTTCCTTCTGAAGCCCTTCCTAATTGATATACTTAGGG	intronic antisense	NM_198464	PRSS55	serine protease 55 isoform 1 precursor	+	10383055	10396333	6.98603	8.30889
ASHGA5P055647	0.0201476	0.0672631	2.50118	down	noncoding	uc001azg.1	CROCCP2	UCSC_knowngene	1912	chr1	-	16951872	16971178	AGCAGCTAGCACAGGTAGGCCAAACTGTGTGTGGGGTGGTCTGGAGAGCATGTGGGGCAG	intergenic							5.51619	6.8388
ASHGA5P037584	0.0429606	0.106776	2.49939	down	noncoding	uc002zuo.1	AX748067	UCSC_knowngene	1842	chr22	-	21642518	21646214	CCTCTGCCTCTCTCCTGGTGGTGGCGTTGAAACAGCACCCTCTGCTTCGGTCCTCTACAG	natural antisense	ENST00000360625	AP000552.1	Uncharacterized protein [Source:UniProtKB/TrEMBL;Acc:E7EQM0]	+	21645341	21648982	7.97028	9.29186
ASHGA5P057632	0.00519818	0.0397779	2.49795	down	noncoding	TCONS_00019972	XLOC_009249	LincRNAs identified by Cabili et al	663	chr11	+	91577563	91589682	AGAGAGAGAGAAAAGATCTGAAGAGAGTGGTTGCAGTTTGAGCTCTGTCAATGGGACAGT	intergenic							3.64001	4.96075
ASHGA5P020909	0.029695	0.0843035	2.49784	down	noncoding	ENST00000521863	LINC00599	GENCODE	545	chr8	-	9760676	9761720	GGGAGCTGCGGAGAAAGGCCTCTCTCTCCGTGTTCACAGCGGACCTTGATTTAAATGTCC	intergenic							3.34393	4.66462
ASHGA5P018041	0.0255231	0.0766608	2.49559	down	noncoding	ENST00000448685	RP11-536K7.3	GENCODE	510	chr10	-	5985452	5987701	CACCATGAAGAGTTATAGTAAGGTGTTGGTGAGGCTGGCTGCTCTGGTTGCTAAGAGAGA	intergenic							4.57275	5.89213
ASHGA5P050608	0.0208299	0.0684923	2.49141	down	noncoding	uc002tee.4	FLJ38668	UCSC_knowngene	555	chr2	-	109123996	109150675	AGGCTAGTCTGGGAGGCTGGCGCAAACGCAGCGGGTGGCTGGGGTAGGGGCTCATTGGGA	natural antisense	NM_181453	GCC2	GRIP and coiled-coil domain-containing protein 2	+	109065576	109125854	5.29143	6.60839
ASHGA5P043468	0.000251844	0.0151781	2.49129	down	noncoding	ENST00000436304	AC091729.9	GENCODE	557	chr7	+	1199661	1200395	GAAAATGTCAGTGTCCCCAGCACCTAGATCCCCCAGTTAAATCCTTTTCCATTTCACCGC	natural antisense	NM_182491	ZFAND2A	AN1-type zinc finger protein 2A	-	1192542	1199855	7.75245	9.06934
ASHGA5P039138	0.0420942	0.105419	2.48856	down	noncoding	ENST00000494887	RP11-298O21.5	GENCODE	538	chr3	+	167621114	167632819	GTCTTCACCCTCCCTACCTTGGAAATTGCTACAACATAATTGTGTTTGTATGTATAATTA	intergenic							8.07114	9.38645
ASHGA5P053758	0.0348032	0.0934475	2.48645	down	noncoding	ENST00000422343	RP11-180I4.2	GENCODE	403	chr9	+	98412435	98478000	GCCCCCTCCAACCAACCTTGATTGTGAAATGATGATGAAATAAACCTTCATTATGGTGTG	intergenic							9.15138	10.4655
ASHGA5P035686	0.000366636	0.0169037	2.48423	down	noncoding	NR_045659	COLEC11	RefSeq	1898	chr2	+	3642421	3692234	AAGGTGTGCTTGCCGGTGTGACTTGGCTGAGTGTGAGTGCGCTGAGATCAGTGTCACTGA	exon sense-overlapping	NM_001255982	COLEC11	collectin-11 isoform c precursor	+	3642421	3692234	3.31172	4.62452
ASHGA5P035686	0.000366636	0.0169037	2.48423	down	noncoding	NR_045659	COLEC11	RefSeq	1898	chr2	+	3642421	3692234	AAGGTGTGCTTGCCGGTGTGACTTGGCTGAGTGTGAGTGCGCTGAGATCAGTGTCACTGA	exon sense-overlapping	NM_001255983	COLEC11	collectin-11 isoform d precursor	+	3642421	3692234	3.31172	4.62452
ASHGA5P035686	0.000366636	0.0169037	2.48423	down	noncoding	NR_045659	COLEC11	RefSeq	1898	chr2	+	3642421	3692234	AAGGTGTGCTTGCCGGTGTGACTTGGCTGAGTGTGAGTGCGCTGAGATCAGTGTCACTGA	exon sense-overlapping	NM_001255984	COLEC11	collectin-11 isoform e precursor	+	3642421	3692234	3.31172	4.62452
ASHGA5P035686	0.000366636	0.0169037	2.48423	down	noncoding	NR_045659	COLEC11	RefSeq	1898	chr2	+	3642421	3692234	AAGGTGTGCTTGCCGGTGTGACTTGGCTGAGTGTGAGTGCGCTGAGATCAGTGTCACTGA	exon sense-overlapping	NM_001255985	COLEC11	collectin-11 isoform f precursor	+	3649495	3692234	3.31172	4.62452
ASHGA5P035686	0.000366636	0.0169037	2.48423	down	noncoding	NR_045659	COLEC11	RefSeq	1898	chr2	+	3642421	3692234	AAGGTGTGCTTGCCGGTGTGACTTGGCTGAGTGTGAGTGCGCTGAGATCAGTGTCACTGA	exon sense-overlapping	NM_001255986	COLEC11	collectin-11 isoform g	+	3653641	3692234	3.31172	4.62452
ASHGA5P035686	0.000366636	0.0169037	2.48423	down	noncoding	NR_045659	COLEC11	RefSeq	1898	chr2	+	3642421	3692234	AAGGTGTGCTTGCCGGTGTGACTTGGCTGAGTGTGAGTGCGCTGAGATCAGTGTCACTGA	exon sense-overlapping	NM_001255987	COLEC11	collectin-11 isoform h	+	3653641	3692234	3.31172	4.62452
ASHGA5P035686	0.000366636	0.0169037	2.48423	down	noncoding	NR_045659	COLEC11	RefSeq	1898	chr2	+	3642421	3692234	AAGGTGTGCTTGCCGGTGTGACTTGGCTGAGTGTGAGTGCGCTGAGATCAGTGTCACTGA	exon sense-overlapping	NM_001255988	COLEC11	collectin-11 isoform i	+	3653641	3692234	3.31172	4.62452
ASHGA5P035686	0.000366636	0.0169037	2.48423	down	noncoding	NR_045659	COLEC11	RefSeq	1898	chr2	+	3642421	3692234	AAGGTGTGCTTGCCGGTGTGACTTGGCTGAGTGTGAGTGCGCTGAGATCAGTGTCACTGA	exon sense-overlapping	NM_001255989	COLEC11	collectin-11 isoform j	+	3653641	3692234	3.31172	4.62452
ASHGA5P035686	0.000366636	0.0169037	2.48423	down	noncoding	NR_045659	COLEC11	RefSeq	1898	chr2	+	3642421	3692234	AAGGTGTGCTTGCCGGTGTGACTTGGCTGAGTGTGAGTGCGCTGAGATCAGTGTCACTGA	exon sense-overlapping	NM_024027	COLEC11	collectin-11 isoform a precursor	+	3642421	3692234	3.31172	4.62452
ASHGA5P035686	0.000366636	0.0169037	2.48423	down	noncoding	NR_045659	COLEC11	RefSeq	1898	chr2	+	3642421	3692234	AAGGTGTGCTTGCCGGTGTGACTTGGCTGAGTGTGAGTGCGCTGAGATCAGTGTCACTGA	exon sense-overlapping	NM_199235	COLEC11	collectin-11 isoform b	+	3642421	3692234	3.31172	4.62452
ASHGA5P030684	0.00887994	0.044916	2.48238	down	noncoding	ENST00000564933	RP11-160C18.2	pseudogene	1432	chr15	+	79019518	79027837	CCCCACCCCACGATGTTAGAAGAAACTCAACAGAGGAAACTGGCCACAGCCAAGAAAAAA								7.94575	9.25748
ASHGA5P049230	0.00410295	0.0377672	2.48216	down	noncoding	TCONS_00023714	XLOC_011515	LincRNAs identified by Cabili et al	699	chr15	-	68775552	68778965	AATTGATTTCGTGGCTTTCTTTCTCCTCTTCTGGGATTTTGTGCCCTATTGCCACAGAAA	intergenic							3.77634	5.08793
ASHGA5P044842	0.041587	0.104709	2.48144	down	noncoding	TCONS_00001117	XLOC_000367	LincRNAs identified by Cabili et al	721	chr1	+	118738865	118749628	GAATCAGACAGACCTGAGTTTAGTCCTTCACATCTACCCTTTTACCCTTCTTATTTTATT	intergenic							6.12341	7.43459
ASHGA5P039518	0.0141014	0.0547683	2.48103	down	noncoding	TCONS_00022431	XLOC_010769	LincRNAs identified by Cabili et al	2083	chr14	+	24164069	24168143	TACATACACACATACCCAGCAACCTTCATATATGTTATCAAAAAGGGAACCCAGACCCGT	intergenic							3.75353	5.06447
ASHGA5P050714	0.000919768	0.0253095	2.47891	down	noncoding	ENST00000432925	AC073636.1	GENCODE	563	chr2	-	177710720	177714156	ACCACCCCACAATGGCAGGAGACACCATGAGATGTTTTCTACTGTAGAAACTTTCTCATT	intergenic							5.60823	6.91793
ASHGA5P038571	0.0053935	0.0400885	2.47872	down	noncoding	ENST00000434969	RP11-71G7.1	GENCODE	827	chr3	-	176321930	176353320	GGGCAAACCTGTGACCTCCCAAAACTTTAATATGAAAGTTTTGTTTGTGTATACTCATGG	intergenic							5.00649	6.31609
ASHGA5P056956	0.0208223	0.0684923	2.4769	down	noncoding	TCONS_00011098	XLOC_005099	LincRNAs identified by Cabili et al	261	chr5	-	177388523	177388871	CCTCTGCCACCTCCCTCCTCAATGTCAGCCATGGCCATCGTTCCCTCTGCCACGCTCCCT	intergenic							11.1652	12.4737
ASHGA5P037291	0.0168471	0.0605382	2.475	down	noncoding	ENST00000436713	RP1-92O14.6	GENCODE	731	chr1	+	43850783	43854826	CTGTTCATCCACTCCTAGAACAGATAGCTAAACCTGTGTGACTCCCATTTAACGTCACAG	natural antisense	NM_052877	MED8	mediator of RNA polymerase II transcription subunit 8 isoform 3	-	43849587	43855483	4.49623	5.80366
ASHGA5P037291	0.0168471	0.0605382	2.475	down	noncoding	ENST00000436713	RP1-92O14.6	GENCODE	731	chr1	+	43850783	43854826	CTGTTCATCCACTCCTAGAACAGATAGCTAAACCTGTGTGACTCCCATTTAACGTCACAG	natural antisense	NM_201542	MED8	mediator of RNA polymerase II transcription subunit 8 isoform 1	-	43850396	43855483	4.49623	5.80366
ASHGA5P023173	0.0319456	0.0881059	2.47347	down	noncoding	ENST00000572353	RP11-353N14.4	GENCODE	540	chr17	+	77893172	77899261	AACGCCTCAGTGACGACCATTTGTGAGCCATCTCTCTGTCTCAGGCACGGTGCTACATGC	intergenic							4.13981	5.44635
ASHGA5P026123	0.0423782	0.105957	2.47112	down	noncoding	TCONS_00014317	XLOC_006476	LincRNAs identified by Cabili et al	337	chr7	-	65564507	65565273	ACAGACCTGAGCCAGGGAGCCTGGCTGTTTCTTCCTCCTACTCCTCCTCTACAGGTGTAA	intronic antisense	ENST00000450043	AC068533.7		+	65552755	65617228	6.03449	7.33965
ASHGA5P058311	0.0066885	0.041722	2.47098	down	noncoding	TCONS_00029886	XLOC_014334	LincRNAs identified by Cabili et al	677	chr22	-	29227138	29227916	ACCACAGAGACAACAGCACCCACCACAGAGACAACAGCACCCACCTCAGAGACAACAGCA	intergenic							6.89737	8.20246
ASHGA5P022859	0.000149919	0.0133081	2.47079	down	noncoding	ENST00000564165	RP11-19N8.4	GENCODE	685	chr16	-	33057849	33106752	TTCTGAAGGGCTGTCCTGAGACCATGTTATCTCTACCTGCATTCTGGAATCAGGGAGAAA	intergenic							3.0426	4.34758
ASHGA5P043219	0.00317646	0.0359388	2.47051	down	noncoding	TCONS_00018397	XLOC_008679	LincRNAs identified by Cabili et al	211	chr10	+	134830881	134831148	GAGGGGTCCAACCATTTCTCATGTATGGCCACACACCACTTCCGTTCACAGAGACCCCAG	intergenic							3.83102	5.13583
ASHGA5P028982	0.00705025	0.0422455	2.46993	down	noncoding	ENST00000548107	CTD-2314B22.3	GENCODE	617	chr14	-	19912754	19925311	TAAAGGGGGCTCTCTGGCCTTGAAATAGTGATGTTTTTTATACAGAAAGGAGAATGCAGA	intergenic							3.92218	5.22665
ASHGA5P032326	0.00354244	0.036337	2.46776	down	noncoding	ENST00000582125	RP11-218M11.6	GENCODE	771	chr17	-	28884749	28885520	TTTTTTCAGTTTGCACACACGCCAATTCAGTCTTTGGGTGTACAGGTCCTCCATGGTTCT	natural antisense	ENST00000580161	TBC1D29	putative TBC1 domain family member 29 [Source:RefSeq peptide;Acc:NP_056409]	+	28884129	28890511	3.22092	4.52412
ASHGA5P031238	0.0289984	0.0830934	2.46592	down	noncoding	ENST00000562846	CTD-2012K14.7	GENCODE	899	chr16	-	67595313	67596212	TTCTCCATCCATCTGACCGTTCCGTTGTGAGAATGCTGGCCCAATAACATACTCTTTTTT	bidirectional	NM_001191022	CTCF	transcriptional repressor CTCF isoform 2	+	67596309	67673088	6.47412	7.77625
ASHGA5P031238	0.0289984	0.0830934	2.46592	down	noncoding	ENST00000562846	CTD-2012K14.7	GENCODE	899	chr16	-	67595313	67596212	TTCTCCATCCATCTGACCGTTCCGTTGTGAGAATGCTGGCCCAATAACATACTCTTTTTT	bidirectional	NM_006565	CTCF	transcriptional repressor CTCF isoform 1	+	67596309	67673088	6.47412	7.77625
ASHGA5P035657	0.0081762	0.0439097	2.46487	down	noncoding	uc010zoo.1	DKFZp686L08115	UCSC_knowngene	2149	chr2	-	242198934	242201083	CATTAGGCTCAGGTCTGGGTCTTCCCTTGTAAAGTTCCCTATCAGTGCTTTGTGTAATCA	intron sense-overlapping	NM_001243900	HDLBP	vigilin isoform b	-	242166681	242212246	4.86179	6.16331
ASHGA5P035657	0.0081762	0.0439097	2.46487	down	noncoding	uc010zoo.1	DKFZp686L08115	UCSC_knowngene	2149	chr2	-	242198934	242201083	CATTAGGCTCAGGTCTGGGTCTTCCCTTGTAAAGTTCCCTATCAGTGCTTTGTGTAATCA	intron sense-overlapping	NM_005336	HDLBP	vigilin isoform a	-	242166681	242255115	4.86179	6.16331
ASHGA5P035657	0.0081762	0.0439097	2.46487	down	noncoding	uc010zoo.1	DKFZp686L08115	UCSC_knowngene	2149	chr2	-	242198934	242201083	CATTAGGCTCAGGTCTGGGTCTTCCCTTGTAAAGTTCCCTATCAGTGCTTTGTGTAATCA	intron sense-overlapping	NM_203346	HDLBP	vigilin isoform a	-	242166681	242212246	4.86179	6.16331
ASHGA5P042015	0.0207563	0.0683794	2.46477	down	noncoding	ENST00000431104	RP11-510H23.3	GENCODE	484	chr6	-	125329900	125330635	GGAAAATCTCTCCACCAGCTACACACACATAAAAGTATTAAACACAACATTTTTACTACC	natural antisense	NM_152553	RNF217	probable E3 ubiquitin-protein ligase RNF217	+	125304513	125404661	4.8044	6.10586
ASHGA5P057615	0.0406203	0.103099	2.46248	down	noncoding	TCONS_00019683	XLOC_009483	LincRNAs identified by Cabili et al	3149	chr11	-	68996242	69002390	TCTCAGGCTTTGCTGGCTTGTGTTTGACACCATGCCTGACACATTGGGGGTGCTCAGTAG	intergenic							5.38573	6.68584
ASHGA5P014941	0.0428698	0.106608	2.46048	down	noncoding	ENST00000414992	DCUN1D2-AS2	GENCODE	330	chr13	+	114123215	114130450	CCGGGACCAGCCTCCTCTTCCCTCCGGTGAGGCATGGACAATCAGACTTCTGGGCCAGGC	intronic antisense	NM_001014283	DCUN1D2	DCN1-like protein 2	-	114110133	114145023	7.07266	8.3716
ASHGA5P042344	0.0220879	0.0707933	2.45976	down	noncoding	ENST00000482052	HLA-L	GENCODE	1765	chr6	+	30227360	30260791	GCAATGCCCAAAGTCATCCTTGGTCACAATAAAGGAGAATAAAGGGAAAAAAGTATGATT	intergenic							3.92091	5.21943
ASHGA5P022862	0.0102576	0.0473874	2.45913	down	noncoding	NR_040069	LOXL1-AS1	RefSeq	2194	chr15	-	74209808	74220589	AAGCTGGGAGGAGCTCCTGCCTGCCTGGATGAAGAGGAGGTCAAGACTTTGTCCCCCACT	intronic antisense	NM_005576	LOXL1	lysyl oxidase homolog 1 preproprotein	+	74218788	74244478	4.95004	6.24819
ASHGA5P021180	4.14797e-05	0.00923249	2.45462	down	noncoding	ENST00000527092	CTD-3074O7.5	GENCODE	828	chr11	-	66240960	66247702	ACAGTATGTCTGTGTGTGCCTTGATCGCATCACCCCCTGGACCTCCAGTGACCGAGATCT	natural antisense	NM_001098510	PELI3	E3 ubiquitin-protein ligase pellino homolog 3 isoform 2	+	66234335	66244808	7.2046	8.5001
ASHGA5P021180	4.14797e-05	0.00923249	2.45462	down	noncoding	ENST00000527092	CTD-3074O7.5	GENCODE	828	chr11	-	66240960	66247702	ACAGTATGTCTGTGTGTGCCTTGATCGCATCACCCCCTGGACCTCCAGTGACCGAGATCT	natural antisense	NM_001243135	PELI3	E3 ubiquitin-protein ligase pellino homolog 3 isoform 3	+	66233797	66244808	7.2046	8.5001
ASHGA5P021180	4.14797e-05	0.00923249	2.45462	down	noncoding	ENST00000527092	CTD-3074O7.5	GENCODE	828	chr11	-	66240960	66247702	ACAGTATGTCTGTGTGTGCCTTGATCGCATCACCCCCTGGACCTCCAGTGACCGAGATCT	natural antisense	NM_001243136	PELI3	E3 ubiquitin-protein ligase pellino homolog 3 isoform 4	+	66234335	66244808	7.2046	8.5001
ASHGA5P021180	4.14797e-05	0.00923249	2.45462	down	noncoding	ENST00000527092	CTD-3074O7.5	GENCODE	828	chr11	-	66240960	66247702	ACAGTATGTCTGTGTGTGCCTTGATCGCATCACCCCCTGGACCTCCAGTGACCGAGATCT	natural antisense	NM_001256670	DPP3	dipeptidyl peptidase 3 isoform 2	+	66247483	66277130	7.2046	8.5001
ASHGA5P021180	4.14797e-05	0.00923249	2.45462	down	noncoding	ENST00000527092	CTD-3074O7.5	GENCODE	828	chr11	-	66240960	66247702	ACAGTATGTCTGTGTGTGCCTTGATCGCATCACCCCCTGGACCTCCAGTGACCGAGATCT	natural antisense	NM_005700	DPP3	dipeptidyl peptidase 3 isoform 1	+	66247483	66277130	7.2046	8.5001
ASHGA5P021180	4.14797e-05	0.00923249	2.45462	down	noncoding	ENST00000527092	CTD-3074O7.5	GENCODE	828	chr11	-	66240960	66247702	ACAGTATGTCTGTGTGTGCCTTGATCGCATCACCCCCTGGACCTCCAGTGACCGAGATCT	natural antisense	NM_130443	DPP3	dipeptidyl peptidase 3 isoform 1	+	66247483	66277130	7.2046	8.5001
ASHGA5P021180	4.14797e-05	0.00923249	2.45462	down	noncoding	ENST00000527092	CTD-3074O7.5	GENCODE	828	chr11	-	66240960	66247702	ACAGTATGTCTGTGTGTGCCTTGATCGCATCACCCCCTGGACCTCCAGTGACCGAGATCT	natural antisense	NM_145065	PELI3	E3 ubiquitin-protein ligase pellino homolog 3 isoform 1	+	66234335	66244808	7.2046	8.5001
ASHGA5P028611	0.00164581	0.0292275	2.45254	down	noncoding	ENST00000435156	RP11-203P2.2	GENCODE	342	chr13	-	78849854	78851649	CTTCCTATACTTTACTTCCCCAGCCTCTTCAGTGGCAGTAGTAAAAGATTTCAAATCCTT	intergenic							3.90019	5.19446
ASHGA5P027168	0.0010634	0.0258808	2.4503	down	noncoding	NR_038927	DDX11-AS1	RefSeq	2031	chr12	-	31173696	31226781	CTGCTGTGTACACAGGAGAAATAATCACTCCACACCCGACTGAACATTTTCTAACCTTAT	natural antisense	NM_001257144	DDX11	probable ATP-dependent RNA helicase DDX11 isoform 3	+	31226778	31257725	6.35286	7.64582
ASHGA5P027168	0.0010634	0.0258808	2.4503	down	noncoding	NR_038927	DDX11-AS1	RefSeq	2031	chr12	-	31173696	31226781	CTGCTGTGTACACAGGAGAAATAATCACTCCACACCCGACTGAACATTTTCTAACCTTAT	natural antisense	NM_001257145	DDX11	probable ATP-dependent RNA helicase DDX11 isoform 4	+	31226778	31257725	6.35286	7.64582
ASHGA5P027168	0.0010634	0.0258808	2.4503	down	noncoding	NR_038927	DDX11-AS1	RefSeq	2031	chr12	-	31173696	31226781	CTGCTGTGTACACAGGAGAAATAATCACTCCACACCCGACTGAACATTTTCTAACCTTAT	natural antisense	NM_004399	DDX11	probable ATP-dependent RNA helicase DDX11 isoform 2	+	31226778	31257725	6.35286	7.64582
ASHGA5P027168	0.0010634	0.0258808	2.4503	down	noncoding	NR_038927	DDX11-AS1	RefSeq	2031	chr12	-	31173696	31226781	CTGCTGTGTACACAGGAGAAATAATCACTCCACACCCGACTGAACATTTTCTAACCTTAT	natural antisense	NM_030653	DDX11	probable ATP-dependent RNA helicase DDX11 isoform 1	+	31226778	31257725	6.35286	7.64582
ASHGA5P027168	0.0010634	0.0258808	2.4503	down	noncoding	NR_038927	DDX11-AS1	RefSeq	2031	chr12	-	31173696	31226781	CTGCTGTGTACACAGGAGAAATAATCACTCCACACCCGACTGAACATTTTCTAACCTTAT	natural antisense	NM_152438	DDX11	probable ATP-dependent RNA helicase DDX11 isoform 3	+	31226778	31257725	6.35286	7.64582
ASHGA5P025822	4.98492e-05	0.00975305	2.44883	down	noncoding	NR_038257	TRPM2	RefSeq	5879	chr21	+	45773483	45862964	TACCTCTGGCTCTTCTCCTTGGTGTGCGAGGAGATGCGGCAGTAGCTCTTCTATGACCCT	exon sense-overlapping	NM_003307	TRPM2	transient receptor potential cation channel subfamily M member 2	+	45773483	45862964	3.13931	4.4314
ASHGA5P015627	0.00346988	0.0361534	2.4487	down	noncoding	ENST00000422064	PMS2P3	GENCODE	567	chr7	-	75141912	75157478	CTCGCTTCCTGTCTATCAGCCACAGTCTCTGCATGTTTCCAAGAGCAACAGGAAATGAAC	intergenic							4.37952	5.67154
ASHGA5P037123	0.0316437	0.0877026	2.44711	down	noncoding	ENST00000442780	RP11-560A15.4	GENCODE	377	chr20	+	55680796	55682184	AGATGGTTCAAGGGTTGTGTGTGTTTCCTCTGCCTGCTGTAATAAATTACTACAAACTAA	intergenic							4.23861	5.52969
ASHGA5P038646	0.00250916	0.0336293	2.44562	down	noncoding	ENST00000457601	SDHAP1	GENCODE	560	chr3	-	195698123	195702773	GGACTCGCTCTGGAGTGAGCAGGCTGGCTGCATACCTGGCCCTGCACTGGTTTTGTTTTT	intergenic							3.92973	5.21993
ASHGA5P047115	0.0171912	0.0610867	2.44254	down	noncoding	TCONS_00013653	XLOC_006309	LincRNAs identified by Cabili et al	1044	chr7	+	156696054	156714884	GAAAAACTCCTCTGCTGCTTCTTCCTCTGATTTCACATTCGGTAAACCTGCAAGTGCACA	intergenic							5.50427	6.79266
ASHGA5P046981	0.0243509	0.0745451	2.44229	down	noncoding	ENST00000456104	RP11-322M19.1	GENCODE	486	chr10	-	88995383	89086431	GGTGATGGTGTGTTGGGAGGGAACTGTTTTAGAAACCAATGTAAATCTGTGTCTACATCA	intergenic							4.63685	5.92508
ASHGA5P035012	0.0476804	0.114148	2.44204	down	noncoding	ENST00000413669	AC009236.1	GENCODE	343	chr2	-	45401480	45402350	GTTGTCTTCCCTTCCTAGAAGCAATGCTTCTATGTTCTCATTTGATGTTGAATAAAACAT	intergenic							4.16097	5.44906
ASHGA5P045263	0.0347004	0.0932048	2.44183	down	noncoding	uc010moa.3	AK310876	UCSC_knowngene	1263	chr9	-	69746916	69757784	TCAAATTGGACCGCTCAGTTAAAAAGTTTTCCCATTAGACTTCCCCTAATCAAATTAGAA	intergenic							4.30068	5.58865
ASHGA5P048510	0.0136991	0.054154	2.44076	down	noncoding	BG953017R		LincRNAs identified by Khalil et al	286	chr4	-	184736396	184736595	TAGTATTTTGCTAAGATTAAGCCTCTTTTGACTACAATTCCATTTCCCCACTTATGCATC	intergenic							3.53117	4.81851
ASHGA5P000112	0.021952	0.070554	2.44025	down	noncoding	BF986711		LincRNAs identified by Khalil et al	245	chr2	+	3184560	3184961	ATTCCAGCACCGACACGGGGACGCTCACTATTCCAGCACCGACACGGGGACGCTCACTAT	intergenic							5.65962	6.94665
ASHGA5P027988	0.0319188	0.0880944	2.44022	down	noncoding	ENST00000440688	RP5-1028L10.2	GENCODE	508	chr1	-	110720264	110721341	TGTGTCATCCTGCATGAACTGTTTGTGTAAAGGGGTGTGTGTGTGTACACACATGTGCAA	intronic antisense	NM_001010898	SLC6A17	sodium-dependent neutral amino acid transporter SLC6A17	+	110693131	110744823	3.44082	4.72783
ASHGA5P055632	0.00191998	0.0307364	2.43876	down	noncoding	ENST00000548457	RP11-1028N23.2	GENCODE	540	chr12	+	116014480	116015420	CAAAAGCAAGGTCAGCCTGTACTGAGTATGAGCACACACACATCCCATGTTCTATTTCTT	intergenic							4.60742	5.89357
ASHGA5P041745	0.000153674	0.0133682	2.43645	down	noncoding	ENST00000431012	ZNRD1-AS1	GENCODE	3294	chr6	-	30022377	30028956	TGTTTCAGGAACTCAGTTTGTCCAAACCTGCATCCATCATCTACCTCAAATTATATCCAC	bidirectional	NM_014596	ZNRD1	DNA-directed RNA polymerase I subunit RPA12	+	30029035	30032686	3.17959	4.46438
ASHGA5P041745	0.000153674	0.0133682	2.43645	down	noncoding	ENST00000431012	ZNRD1-AS1	GENCODE	3294	chr6	-	30022377	30028956	TGTTTCAGGAACTCAGTTTGTCCAAACCTGCATCCATCATCTACCTCAAATTATATCCAC	bidirectional	NM_170783	ZNRD1	DNA-directed RNA polymerase I subunit RPA12	+	30029035	30032686	3.17959	4.46438
ASHGA5P043107	0.0313628	0.0872913	2.43576	down	noncoding	uc003tvq.3	PMS2P4	UCSC_knowngene	722	chr7	-	66752526	66767406	TCCTCTTCTCCTTCCTGGTGTCTGCCATTAGCATTGGAATAAAGTTCCTGCTGAAAATCC	intergenic							8.85707	10.1414
ASHGA5P049549	0.0496098	0.117325	2.43551	down	noncoding	ENST00000446853	CCDC144B	GENCODE	485	chr17	-	18431899	18454999	CAAGTTTAACGTGTGTGCTCCACTCCTCCAACCTGGCCAAAGGGCAGTCATCATCACTGG	intergenic							6.17685	7.46107
ASHGA5P042250	0.00113703	0.026449	2.43483	down	noncoding	ENST00000500636	RP3-510L9.1	GENCODE	704	chr6	+	11173684	11259332	ATTTAACATCATTCCCTGCTGACTCTTGTCTCTCTGGAAAATTGACAGTTAGGAGACAAA	intronic antisense	NM_182966	NEDD9	enhancer of filamentation 1 isoform 2	-	11200605	11232915	3.39409	4.67791
ASHGA5P042250	0.00113703	0.026449	2.43483	down	noncoding	ENST00000500636	RP3-510L9.1	GENCODE	704	chr6	+	11173684	11259332	ATTTAACATCATTCCCTGCTGACTCTTGTCTCTCTGGAAAATTGACAGTTAGGAGACAAA	natural antisense	NM_001142393	NEDD9	enhancer of filamentation 1 isoform 3	-	11183530	11382581	3.39409	4.67791
ASHGA5P042250	0.00113703	0.026449	2.43483	down	noncoding	ENST00000500636	RP3-510L9.1	GENCODE	704	chr6	+	11173684	11259332	ATTTAACATCATTCCCTGCTGACTCTTGTCTCTCTGGAAAATTGACAGTTAGGAGACAAA	natural antisense	NM_006403	NEDD9	enhancer of filamentation 1 isoform 1	-	11183530	11232915	3.39409	4.67791
ASHGA5P032666	0.00504734	0.039342	2.43453	down	noncoding	uc002jrt.3	AX747521	UCSC_knowngene	2016	chr17	-	74492855	74494871	TTCCCTCTCCCAGTGGGTCTCCCCAGGTTGTCAGCTCCATTTAGTCATAAGAAGATCTGG	intron sense-overlapping	NM_024599	RHBDF2	inactive rhomboid protein 2 isoform 1	-	74466974	74497509	7.14828	8.43192
ASHGA5P020983	0.0169805	0.0607359	2.43133	down	noncoding	ENST00000523050	CTC-353G13.1	GENCODE	663	chr5	-	167364721	167380474	GAGATCATTTTCAAACTCTTCCCTCCTCACCCAAAATACATGAAAAGCCCTTCTGTAAAG	intronic antisense	NM_001122679	ODZ2	teneurin-2	+	166711842	167691162	6.85628	8.13803
ASHGA5P058206	0.00554149	0.0401563	2.43092	down	noncoding	TCONS_00028191	XLOC_013543	LincRNAs identified by Cabili et al	1920	chr20	+	46523122	46525630	GGAGCTGCCAACCCAGGGAGGAGCAATTTTGTTGTAGTTCAAGGGTCCGGTAGCTGGCAA	intergenic							3.33793	4.61944
ASHGA5P045715	0.028729	0.0825779	2.42969	down	noncoding	ENST00000512404	RP11-397D12.6	GENCODE	363	chr9	+	37432083	37433871	CTGCTGGGTCTCTGTCCCTAAAGGAACAGAATGTAGGTGTGAGTGGATTTGTTTAAAAAA	exon sense-overlapping	NM_012203	GRHPR	glyoxylate reductase/hydroxypyruvate reductase	+	37422706	37436986	4.06509	5.34586
ASHGA5P023315	0.0153095	0.0573858	2.42927	down	noncoding	ENST00000578037	AC022596.2	GENCODE	593	chr17	-	16751437	16753672	TTTTGGAAACCAGTCGGACCAGCCCTTCATGTCTTCGATGTAAAATAGAGAGAGGCTGAA	intergenic							7.03143	8.31195
ASHGA5P033032	0.0112017	0.0491399	2.42744	down	noncoding	TCONS_00029153	XLOC_014094	LincRNAs identified by Cabili et al	337	chr21	-	44071700	44072723	AGGAACCCTTTCCTCTCCCAGATCCCCATGGAGCAGTGCGGTCTTCCATTCGTCAACAAT	intergenic							6.51185	7.79129
ASHGA5P035297	0.00354267	0.036337	2.42442	down	noncoding	ENST00000433431	AC079776.7	pseudogene	123	chr2	-	130725830	130725953	GGGATAGCGTCTCTCACCATCTTGACTGCTTACCAACAGAAGCGCCAAAACCAAACTTGA								3.34334	4.62098
ASHGA5P057137	0.00310696	0.0358067	2.42317	down	noncoding	TCONS_00013649	XLOC_006303	LincRNAs identified by Cabili et al	1066	chr7	+	155005958	155008794	AAGAACCCAGGTCCTCCTTCCCACCAGACATGAGGATTTTAACTTGATCATCTCTGCAAA	intergenic							6.57129	7.84818
ASHGA5P040132	0.00462321	0.0388724	2.42268	down	noncoding	uc009whu.1	DQ592442	UCSC_knowngene	2772	chr1	+	142853227	142855999	CACCGCATTACTGAAGCTATACTAACAACAGTCACTTTTAGTGGGTACTTCATGCATCAG	intergenic							4.37909	5.65569
ASHGA5P058170	0.0211158	0.0692176	2.42182	down	noncoding	TCONS_00027288	XLOC_013290	LincRNAs identified by Cabili et al	448	chr19	-	30185929	30187465	TGTCTGGGTGTCCAAGTGTCCAGGTGTCAGGTGTCTGGGTGTCAGGTGTCTCGGTGTCCG	intergenic							3.91782	5.19391
ASHGA5P041340	0.0471172	0.113172	2.42068	down	noncoding	ENST00000515092	RP11-43D2.2	GENCODE	832	chr5	+	124043519	124046430	TTATGTATGTCTCCTGCCTCTTCTTTCCATACCTCCCAAATGTTGATCCAAAACACTGAT	intronic antisense	NM_020747	ZNF608	zinc finger protein 608	-	123972609	124080805	5.91931	7.19473
ASHGA5P041999	0.00143039	0.0281188	2.41998	down	noncoding	ENST00000457319	RP3-486I3.5	GENCODE	421	chr6	-	116565349	116565891	GTGTGTCCCCAGGTGAATTCTAATCACAAAACTACTGTATAGAAAATATCAATAAGGTTC	natural antisense	NM_152729	NT5DC1	5'-nucleotidase domain-containing protein 1	+	116421998	116566853	4.09311	5.36811
ASHGA5P019464	0.00114433	0.026449	2.4196	down	noncoding	uc003squ.3	PMS2CL	UCSC_knowngene	3329	chr7	+	6749756	6793493	GCCTTAGCAGGTCTACCAGCCACAGTCTCTGCACGTTTCCAAGAGCAGCAGAAAATGAAC	intergenic							4.23586	5.51063
ASHGA5P027458	0.00706371	0.0422951	2.41844	down	noncoding	TCONS_00012342	XLOC_005894	LincRNAs identified by Cabili et al	262	chr6	-	158211220	158226738	ACTTTTTATTTGTGTCCTGTGTTCTGTCCTCATTTGTGGTGGACCATGATGGACCTGGCA	intergenic							3.43027	4.70435
ASHGA5P029895	0.0332261	0.0905105	2.41584	down	noncoding	ENST00000567770	RP11-932O9.4	GENCODE	1068	chr15	-	30471078	30472146	AAACTGAAGTCGTTCCTCCTTCTCAAGTGCGAAGTGAACCTGCAGCAGAACATTAGAAAC	intergenic							3.28675	4.55928
ASHGA5P038184	0.00328792	0.0361534	2.41519	down	noncoding	ENST00000456335	RP11-528N21.1	GENCODE	717	chr3	-	40644615	40646918	GAAGCCTGCCTCACTTAGTGAATGTTACATGTGGTAGCTATAATTATATGTGTTTAGTAA	intergenic							3.98884	5.26098
ASHGA5P058606	0.013111	0.0528393	2.41485	down	noncoding	uc010vzg.1	AK295707	UCSC_knowngene	368	chr17	+	20318817	20319997	TGATCACAGGCAAGGCAAAGGAAAATGACAGGCCCTTGCCTTCCCGGTCCTCAAGGGTCA	intergenic							5.84765	7.11958
ASHGA5P013198	0.00310441	0.0358067	2.41464	down	noncoding	NR_027673	ADARB1	RefSeq	5073	chr21	+	46494492	46646478	TGCCAGCCAGACAGAAACAGTCTCCGCCAGTCAAGAAACCCTCAAAAGTATTTTGCCATG	exon sense-overlapping	NM_001112	ADARB1	double-stranded RNA-specific editase 1 isoform 1	+	46494492	46646478	5.02814	6.29995
ASHGA5P013198	0.00310441	0.0358067	2.41464	down	noncoding	NR_027673	ADARB1	RefSeq	5073	chr21	+	46494492	46646478	TGCCAGCCAGACAGAAACAGTCTCCGCCAGTCAAGAAACCCTCAAAAGTATTTTGCCATG	exon sense-overlapping	NM_001160230	ADARB1	double-stranded RNA-specific editase 1 isoform 7	+	46494492	46646478	5.02814	6.29995
ASHGA5P013198	0.00310441	0.0358067	2.41464	down	noncoding	NR_027673	ADARB1	RefSeq	5073	chr21	+	46494492	46646478	TGCCAGCCAGACAGAAACAGTCTCCGCCAGTCAAGAAACCCTCAAAAGTATTTTGCCATG	exon sense-overlapping	NM_015833	ADARB1	double-stranded RNA-specific editase 1 isoform 2	+	46494492	46646478	5.02814	6.29995
ASHGA5P013198	0.00310441	0.0358067	2.41464	down	noncoding	NR_027673	ADARB1	RefSeq	5073	chr21	+	46494492	46646478	TGCCAGCCAGACAGAAACAGTCTCCGCCAGTCAAGAAACCCTCAAAAGTATTTTGCCATG	exon sense-overlapping	NM_015834	ADARB1	double-stranded RNA-specific editase 1 isoform 3	+	46494492	46646478	5.02814	6.29995
ASHGA5P045669	0.0337399	0.0913433	2.41373	down	noncoding	TCONS_00001838	XLOC_001223	LincRNAs identified by Cabili et al	1129	chr1	-	224151307	224159470	AATTACTGGCTCAATGTAATGGCTCCATCTCAGGAACAGCCAATGAAAGAGATGCACAGG	intergenic							3.43201	4.70327
ASHGA5P035460	0.0013722	0.027748	2.41186	down	noncoding	TCONS_00015968	XLOC_007341	LincRNAs identified by Cabili et al	349	chr9	+	35913870	35914639	AGTGTGTGTTGGCCCCAGGTACCCCTGCCATTCTCCGCAGTGTAGCCTGCTGTATAAGAA	intergenic							6.80089	8.07103
ASHGA5P047768	0.00952285	0.0461336	2.41016	down	noncoding	ENST00000433110	RP11-4C20.4	GENCODE	371	chr10	+	129732961	129734431	GCCCTTCATTCATCAAATGGGATACAACTTTCATTTCTTATTAAAATCTGGAAGTCACTC	intron sense-overlapping	NM_006504	PTPRE	receptor-type tyrosine-protein phosphatase epsilon isoform 1 precursor	+	129705324	129884164	4.40464	5.67377
ASHGA5P029640	0.022042	0.0707445	2.40908	down	noncoding	ENST00000561794	RP6-91H8.2	GENCODE	651	chr14	+	71648172	71648823	CTTCTGCTAACCCCTAAAAGGAATTTACATTCTGCTCATTTCACTTCCCATTATATTGTA	intergenic							7.1994	8.46788
ASHGA5P030367	0.0185659	0.0640863	2.4089	down	noncoding	ENST00000441272	RP11-66D17.3	GENCODE	4120	chr1	-	156657488	156661789	GAGCCACTGTCCTCTCCATTCTTTTTATTGTTATTTTGCCTTTTGAAAATATTTTTGCAT	intergenic							6.51822	7.7866
ASHGA5P055826	0.0424146	0.106019	2.40846	down	noncoding	ENST00000445540	GPC6-AS2	GENCODE	587	chr13	-	94470676	94488397	GGACAAGACTGTGCTGGTATCTTTTCCTTTCTCCTCCATTTCTTTCCCATTTATCAGCAC	intronic antisense	NM_005708	GPC6	glypican-6 precursor	+	93879077	95060273	5.21479	6.4829
ASHGA5P035810	0.000985023	0.0257564	2.40762	down	noncoding	TCONS_00005104	XLOC_002010	LincRNAs identified by Cabili et al	1326	chr2	-	20737348	20739861	TCACCAAGTGTGCCCTCTGTCCTGTCACTTGGAGCTCCTGGAAGCACAGAATGTCCCTCA	intergenic							4.89591	6.16352
ASHGA5P028466	0.00887134	0.044916	2.40718	down	noncoding	ENST00000457719	RP11-418J17.3	GENCODE	898	chr1	-	119802887	119869926	CACTTCTTCCCTGACCCTCTTCTTGTAAATTTCTAAAACTAGCAATACAAGATTCAAATC	intergenic							5.66507	6.93241
ASHGA5P056962	0.00196995	0.0309043	2.40687	down	noncoding	TCONS_00011442	XLOC_005595	LincRNAs identified by Cabili et al	2641	chr6	-	6695026	6700720	TGCTCTGCATCTGCCTGGATGTCTGCCAAGATCTCAGTCTTCTTTCCACCAATGACCCCT	intergenic							4.03721	5.30437
ASHGA5P030914	0.00201075	0.0311615	2.40616	down	noncoding	ENST00000574245	LA16c-360H6.3	GENCODE	821	chr16	-	3357572	3358393	GGAGTACAACTTTTATGACCCTTCATCCTCTTGTGAAGATGGAAGCCTTCACTTTAAAAA	intronic antisense	NM_153028	ZNF75A	zinc finger protein 75A	+	3355432	3368576	3.92724	5.19397
ASHGA5P019628	0.00905266	0.0451702	2.40596	down	noncoding	NR_028294	PTGER3	RefSeq	2080	chr1	-	71318035	71513491	AAAGAAGACTCAGAGAGCAAGCTCCTCTTCTTCCCACCTCTACTGTGATTGATCCTTCAA	exon sense-overlapping	NM_001126044	PTGER3	prostaglandin E2 receptor EP3 subtype isoform 4	-	71418114	71513491	4.68272	5.94933
ASHGA5P019628	0.00905266	0.0451702	2.40596	down	noncoding	NR_028294	PTGER3	RefSeq	2080	chr1	-	71318035	71513491	AAAGAAGACTCAGAGAGCAAGCTCCTCTTCTTCCCACCTCTACTGTGATTGATCCTTCAA	exon sense-overlapping	NM_198714	PTGER3	prostaglandin E2 receptor EP3 subtype isoform 4	-	71318035	71513491	4.68272	5.94933
ASHGA5P019628	0.00905266	0.0451702	2.40596	down	noncoding	NR_028294	PTGER3	RefSeq	2080	chr1	-	71318035	71513491	AAAGAAGACTCAGAGAGCAAGCTCCTCTTCTTCCCACCTCTACTGTGATTGATCCTTCAA	exon sense-overlapping	NM_198715	PTGER3	prostaglandin E2 receptor EP3 subtype isoform 5	-	71471536	71513491	4.68272	5.94933
ASHGA5P019628	0.00905266	0.0451702	2.40596	down	noncoding	NR_028294	PTGER3	RefSeq	2080	chr1	-	71318035	71513491	AAAGAAGACTCAGAGAGCAAGCTCCTCTTCTTCCCACCTCTACTGTGATTGATCCTTCAA	exon sense-overlapping	NM_198716	PTGER3	prostaglandin E2 receptor EP3 subtype isoform 6	-	71318035	71513491	4.68272	5.94933
ASHGA5P019628	0.00905266	0.0451702	2.40596	down	noncoding	NR_028294	PTGER3	RefSeq	2080	chr1	-	71318035	71513491	AAAGAAGACTCAGAGAGCAAGCTCCTCTTCTTCCCACCTCTACTGTGATTGATCCTTCAA	exon sense-overlapping	NM_198717	PTGER3	prostaglandin E2 receptor EP3 subtype isoform 7	-	71318035	71513491	4.68272	5.94933
ASHGA5P019628	0.00905266	0.0451702	2.40596	down	noncoding	NR_028294	PTGER3	RefSeq	2080	chr1	-	71318035	71513491	AAAGAAGACTCAGAGAGCAAGCTCCTCTTCTTCCCACCTCTACTGTGATTGATCCTTCAA	exon sense-overlapping	NM_198718	PTGER3	prostaglandin E2 receptor EP3 subtype isoform 8	-	71418114	71513491	4.68272	5.94933
ASHGA5P019628	0.00905266	0.0451702	2.40596	down	noncoding	NR_028294	PTGER3	RefSeq	2080	chr1	-	71318035	71513491	AAAGAAGACTCAGAGAGCAAGCTCCTCTTCTTCCCACCTCTACTGTGATTGATCCTTCAA	exon sense-overlapping	NM_198719	PTGER3	prostaglandin E2 receptor EP3 subtype isoform 4	-	71436463	71513491	4.68272	5.94933
ASHGA5P031963	0.00344728	0.0361534	2.40495	down	noncoding	TCONS_00029809	XLOC_014244	LincRNAs identified by Cabili et al	1397	chr22	+	39462293	39465987	TACAAGGTGCTTGGTGGGGGAACTTCTGAGACTCATTGTCCAGGAGAAATAACTTCACAA	intron sense-overlapping	ENST00000452957	APOBEC3G	apolipoprotein B mRNA editing enzyme, catalytic polypeptide-like 3G [Source:HGNC Symbol;Acc:17357]	+	39436923	39483735	4.37553	5.64154
ASHGA5P018013	0.00278867	0.0344152	2.40414	down	noncoding	ENST00000448371	RP11-157P1.4	GENCODE	307	chr20	-	60880487	60881452	TCCCAGGAAACCCTGAGCTCACAGCACCCACGCACACCCCGAATGGCTATGGAAGCTGCA	intronic antisense	NM_007002	ADRM1	proteasomal ubiquitin receptor ADRM1 precursor	+	60878026	60883918	7.26554	8.53106
ASHGA5P018013	0.00278867	0.0344152	2.40414	down	noncoding	ENST00000448371	RP11-157P1.4	GENCODE	307	chr20	-	60880487	60881452	TCCCAGGAAACCCTGAGCTCACAGCACCCACGCACACCCCGAATGGCTATGGAAGCTGCA	intronic antisense	NM_175573	ADRM1	proteasomal ubiquitin receptor ADRM1 precursor	+	60878026	60883918	7.26554	8.53106
ASHGA5P055052	0.0255853	0.0766774	2.40374	down	noncoding	ENST00000528156	RP11-113K21.5	GENCODE	658	chr11	+	82783384	82784642	ACGCTTCCTTCTCCATTTTTTAGCTAAGAGATTGAGAGAGTCGGTTTACTTTTGGGCTTG	bidirectional	NM_014488	RAB30	ras-related protein Rab-30	-	82692477	82782884	3.4855	4.75079
ASHGA5P050609	0.0167657	0.0604362	2.40238	down	noncoding	NR_027467	LIMS3	RefSeq	2558	chr2	+	110656008	110683202	TTCTTCCCCCCCTGCAACTTTTGGGCGTGTATTTGTAGTCATCAGAAATTTGGGCCAAGG	exon sense-overlapping	NM_001205288	LIMS3L	LIM and senescent cell antigen-like-containing domain protein 3-like	+	110656008	110664033	10.374	11.6385
ASHGA5P050609	0.0167657	0.0604362	2.40238	down	noncoding	NR_027467	LIMS3	RefSeq	2558	chr2	+	110656008	110683202	TTCTTCCCCCCCTGCAACTTTTGGGCGTGTATTTGTAGTCATCAGAAATTTGGGCCAAGG	exon sense-overlapping	NM_033514	LIMS3	LIM and senescent cell antigen-like-containing domain protein 3	+	110656008	110664033	10.374	11.6385
ASHGA5P040190	0.0199178	0.0667153	2.40016	down	noncoding	ENST00000429884	BX004987.6	GENCODE	362	chr1	+	143498343	143517299	GAGAGGATTTCAGATGATAGAAGTCGGGCAAATATCCCAGGTTTAATAAATAAGCAAATG	intergenic							3.37433	4.63746
ASHGA5P043580	0.0063157	0.0410595	2.39956	down	noncoding	NR_037843	HOTTIP	RefSeq	3772	chr7	+	27240039	27246130	TTTTTGTTTTTTGGTAGCCCTTTGGCAGGGATAGTTTTTCCACCTTTGCCCGATACAATT	bidirectional	NM_000522	HOXA13	homeobox protein Hox-A13	-	27236498	27239725	6.45918	7.72195
ASHGA5P014883	0.0283259	0.0819558	2.39903	down	noncoding	ENST00000414345	LINC00362	GENCODE	264	chr13	+	23743973	23744736	AGAAAGTGTGTCTTTCTGAATTGCTGCTTCTCCTCTTCCTGTTGTTGCCTTCTTCTTCTG	intergenic							4.80427	6.06672
ASHGA5P042131	0.000610739	0.0210027	2.39863	down	noncoding	ENST00000455607	RP11-350J20.5	GENCODE	436	chr6	-	150118391	150119308	GACCACTCACTGCACAATTCTCTCCCTCATATGCATATTTTATTTTCCTTCCAATAGATA	intronic antisense	NM_001252049	PCMT1	protein-L-isoaspartate(D-aspartate) O-methyltransferase isoform 2	+	150070830	150132557	5.78357	7.04578
ASHGA5P042131	0.000610739	0.0210027	2.39863	down	noncoding	ENST00000455607	RP11-350J20.5	GENCODE	436	chr6	-	150118391	150119308	GACCACTCACTGCACAATTCTCTCCCTCATATGCATATTTTATTTTCCTTCCAATAGATA	intronic antisense	NM_001252050	PCMT1	protein-L-isoaspartate(D-aspartate) O-methyltransferase isoform 3	+	150070830	150132557	5.78357	7.04578
ASHGA5P042131	0.000610739	0.0210027	2.39863	down	noncoding	ENST00000455607	RP11-350J20.5	GENCODE	436	chr6	-	150118391	150119308	GACCACTCACTGCACAATTCTCTCCCTCATATGCATATTTTATTTTCCTTCCAATAGATA	intronic antisense	NM_001252051	PCMT1	protein-L-isoaspartate(D-aspartate) O-methyltransferase isoform 4	+	150070830	150132557	5.78357	7.04578
ASHGA5P042131	0.000610739	0.0210027	2.39863	down	noncoding	ENST00000455607	RP11-350J20.5	GENCODE	436	chr6	-	150118391	150119308	GACCACTCACTGCACAATTCTCTCCCTCATATGCATATTTTATTTTCCTTCCAATAGATA	intronic antisense	NM_001252052	PCMT1	protein-L-isoaspartate(D-aspartate) O-methyltransferase isoform 5	+	150070830	150132557	5.78357	7.04578
ASHGA5P042131	0.000610739	0.0210027	2.39863	down	noncoding	ENST00000455607	RP11-350J20.5	GENCODE	436	chr6	-	150118391	150119308	GACCACTCACTGCACAATTCTCTCCCTCATATGCATATTTTATTTTCCTTCCAATAGATA	intronic antisense	NM_001252053	PCMT1	protein-L-isoaspartate(D-aspartate) O-methyltransferase isoform 1	+	150070830	150123667	5.78357	7.04578
ASHGA5P042131	0.000610739	0.0210027	2.39863	down	noncoding	ENST00000455607	RP11-350J20.5	GENCODE	436	chr6	-	150118391	150119308	GACCACTCACTGCACAATTCTCTCCCTCATATGCATATTTTATTTTCCTTCCAATAGATA	intronic antisense	NM_005389	PCMT1	protein-L-isoaspartate(D-aspartate) O-methyltransferase isoform 1	+	150070830	150132557	5.78357	7.04578
ASHGA5P022289	0.0270449	0.0795729	2.39848	down	noncoding	ENST00000553961	ACTN1-AS1	GENCODE	599	chr14	+	69446398	69454180	AGGGTCTCAGAGAGAATCACCTCCATCCCACCTACCTCACAGGATGGCTGTGCACATTCA	bidirectional	NM_001102	ACTN1	alpha-actinin-1 isoform b	-	69340839	69446083	5.23442	6.49655
ASHGA5P022289	0.0270449	0.0795729	2.39848	down	noncoding	ENST00000553961	ACTN1-AS1	GENCODE	599	chr14	+	69446398	69454180	AGGGTCTCAGAGAGAATCACCTCCATCCCACCTACCTCACAGGATGGCTGTGCACATTCA	bidirectional	NM_001130004	ACTN1	alpha-actinin-1 isoform a	-	69340839	69446083	5.23442	6.49655
ASHGA5P022289	0.0270449	0.0795729	2.39848	down	noncoding	ENST00000553961	ACTN1-AS1	GENCODE	599	chr14	+	69446398	69454180	AGGGTCTCAGAGAGAATCACCTCCATCCCACCTACCTCACAGGATGGCTGTGCACATTCA	bidirectional	NM_001130005	ACTN1	alpha-actinin-1 isoform c	-	69340839	69446083	5.23442	6.49655
ASHGA5P023474	0.00252854	0.0337247	2.39807	down	noncoding	ENST00000581666	RP11-454P7.3	GENCODE	415	chr18	-	15196997	15197728	GACCCTGGAGGTGAGGAAACTGAAGGCCTGAGGGAGAACTGACTTGCCAGGAACCCCTGT	intergenic							4.47988	5.74176
ASHGA5P000024	0.000298252	0.0157153	2.39782	down	noncoding	AI916326		RNAdb	411	chr6	+	26086517	26086921	ATGTGCCACCTTAGGGAATTTCCACCTGTACCCTCCTTTCTCTTTCTCCAGGATATTTTG	intergenic							7.21773	8.47945
ASHGA5P021633	0.00226953	0.0319503	2.39524	down	noncoding	ENST00000536673	RP11-76C10.5	GENCODE	1037	chr12	-	131474705	131478512	ACCCGTTCTTTCCCTCCTGGACGTGCCAGGCAAACAGCCCAAGCAGAAGAACATCAGCAA	natural antisense	NM_198827	GPR133	probable G-protein coupled receptor 133 precursor	+	131438451	131626008	4.41456	5.67473
ASHGA5P041942	0.00294085	0.0351836	2.39509	down	noncoding	ENST00000425588	RP11-16C18.3	GENCODE	442	chr6	-	90272108	90276690	TAAGGGAGGGAGGGATGCAGAAAGGGTTGAAATCTGTAATAAACTGCCTCCAAGAAAACA	natural antisense	NM_001242809	ANKRD6	ankyrin repeat domain-containing protein 6 isoform a	+	90142896	90343553	3.2281	4.48817
ASHGA5P041942	0.00294085	0.0351836	2.39509	down	noncoding	ENST00000425588	RP11-16C18.3	GENCODE	442	chr6	-	90272108	90276690	TAAGGGAGGGAGGGATGCAGAAAGGGTTGAAATCTGTAATAAACTGCCTCCAAGAAAACA	natural antisense	NM_001242811	ANKRD6	ankyrin repeat domain-containing protein 6 isoform a	+	90272036	90343553	3.2281	4.48817
ASHGA5P041942	0.00294085	0.0351836	2.39509	down	noncoding	ENST00000425588	RP11-16C18.3	GENCODE	442	chr6	-	90272108	90276690	TAAGGGAGGGAGGGATGCAGAAAGGGTTGAAATCTGTAATAAACTGCCTCCAAGAAAACA	natural antisense	NM_001242813	ANKRD6	ankyrin repeat domain-containing protein 6 isoform c	+	90142896	90343553	3.2281	4.48817
ASHGA5P041942	0.00294085	0.0351836	2.39509	down	noncoding	ENST00000425588	RP11-16C18.3	GENCODE	442	chr6	-	90272108	90276690	TAAGGGAGGGAGGGATGCAGAAAGGGTTGAAATCTGTAATAAACTGCCTCCAAGAAAACA	natural antisense	NM_001242814	ANKRD6	ankyrin repeat domain-containing protein 6 isoform d	+	90276556	90343553	3.2281	4.48817
ASHGA5P041942	0.00294085	0.0351836	2.39509	down	noncoding	ENST00000425588	RP11-16C18.3	GENCODE	442	chr6	-	90272108	90276690	TAAGGGAGGGAGGGATGCAGAAAGGGTTGAAATCTGTAATAAACTGCCTCCAAGAAAACA	natural antisense	NM_014942	ANKRD6	ankyrin repeat domain-containing protein 6 isoform b	+	90142896	90343553	3.2281	4.48817
ASHGA5P049844	0.00170762	0.0294095	2.39337	down	noncoding	NR_036520	LOC100287042	RefSeq	2597	chr17	+	73267379	73269976	GCTGCCACCCAGCCGCAAGCGGAACTCGCTTGGCTCGTCACCCCTTCACCCGGTGCGCCT	natural antisense	NM_001126121	SLC25A19	mitochondrial thiamine pyrophosphate carrier	-	73269060	73285530	8.54502	9.80406
ASHGA5P049844	0.00170762	0.0294095	2.39337	down	noncoding	NR_036520	LOC100287042	RefSeq	2597	chr17	+	73267379	73269976	GCTGCCACCCAGCCGCAAGCGGAACTCGCTTGGCTCGTCACCCCTTCACCCGGTGCGCCT	natural antisense	NM_001126122	SLC25A19	mitochondrial thiamine pyrophosphate carrier	-	73269060	73285530	8.54502	9.80406
ASHGA5P049844	0.00170762	0.0294095	2.39337	down	noncoding	NR_036520	LOC100287042	RefSeq	2597	chr17	+	73267379	73269976	GCTGCCACCCAGCCGCAAGCGGAACTCGCTTGGCTCGTCACCCCTTCACCCGGTGCGCCT	natural antisense	NM_021734	SLC25A19	mitochondrial thiamine pyrophosphate carrier	-	73269060	73285530	8.54502	9.80406
ASHGA5P021975	0.0280864	0.0814929	2.3933	down	noncoding	ENST00000546103	RP11-90J7.3	GENCODE	1267	chr10	+	80008496	80311112	AGCCAGAACATGGATGTTGTTGCCAAGGAAACCACCTCCTTCCTCCTGTGACAAGGCATC	intergenic							6.10693	7.36593
ASHGA5P015218	0.00214027	0.0314014	2.39218	down	noncoding	ENST00000418031	AC005009.2	GENCODE	680	chr7	-	86413694	86415986	GCCGCAGCAGGACTAGGAGACTCTGGACAAAATGGCCTATACTGACTTATTTAGGCATAG	natural antisense	NM_000840	GRM3	metabotropic glutamate receptor 3 precursor	+	86273229	86494192	3.29017	4.5485
ASHGA5P018529	0.0126177	0.0520105	2.3904	down	noncoding	ENST00000458346	RP11-492E3.1	GENCODE	566	chr9	+	132253270	132265853	CCTCCCTCAGGGCCCAGGACACAGTGAGCATACAATAGACATTAGCTGCTGTGGTGTCTT	intergenic							4.4645	5.72175
ASHGA5P045838	0.0104139	0.0476321	2.38821	down	noncoding	uc004aua.1	DNAPTP1	UCSC_knowngene	1867	chr9	+	96325163	96327030	GGCCAAAATTGGCATCCTCTCTCTTCTGTTTATCAGAAACCACCTTCTCATTTGTTGTCC	exon sense-overlapping	NM_014612	FAM120A	constitutive coactivator of PPAR-gamma-like protein 1	+	96214172	96328397	4.20832	5.46425
ASHGA5P048876	0.00619276	0.0409468	2.38691	down	noncoding	TCONS_00024761	XLOC_012044	LincRNAs identified by Cabili et al	799	chr16	-	86254969	86259500	TGAGTCGACGGTACACATGCCCTTCCACAACACAAAGGTCTCCACTTTGCCACGTGTCAC	intergenic							4.66028	5.91542
ASHGA5P018682	0.015745	0.0583541	2.38576	down	noncoding	ENST00000456450	AC010907.2	GENCODE	693	chr2	-	3650986	3651832	GCCTTCCTCGGGCGTTACAACTTGGAAAACAAGACCAGGCGCAGTGGCTCACACCTGTAA	intronic antisense	NM_001255982	COLEC11	collectin-11 isoform c precursor	+	3642421	3692234	5.7598	7.01425
ASHGA5P018682	0.015745	0.0583541	2.38576	down	noncoding	ENST00000456450	AC010907.2	GENCODE	693	chr2	-	3650986	3651832	GCCTTCCTCGGGCGTTACAACTTGGAAAACAAGACCAGGCGCAGTGGCTCACACCTGTAA	intronic antisense	NM_001255983	COLEC11	collectin-11 isoform d precursor	+	3642421	3692234	5.7598	7.01425
ASHGA5P018682	0.015745	0.0583541	2.38576	down	noncoding	ENST00000456450	AC010907.2	GENCODE	693	chr2	-	3650986	3651832	GCCTTCCTCGGGCGTTACAACTTGGAAAACAAGACCAGGCGCAGTGGCTCACACCTGTAA	intronic antisense	NM_001255984	COLEC11	collectin-11 isoform e precursor	+	3642421	3692234	5.7598	7.01425
ASHGA5P018682	0.015745	0.0583541	2.38576	down	noncoding	ENST00000456450	AC010907.2	GENCODE	693	chr2	-	3650986	3651832	GCCTTCCTCGGGCGTTACAACTTGGAAAACAAGACCAGGCGCAGTGGCTCACACCTGTAA	intronic antisense	NM_024027	COLEC11	collectin-11 isoform a precursor	+	3642421	3692234	5.7598	7.01425
ASHGA5P018682	0.015745	0.0583541	2.38576	down	noncoding	ENST00000456450	AC010907.2	GENCODE	693	chr2	-	3650986	3651832	GCCTTCCTCGGGCGTTACAACTTGGAAAACAAGACCAGGCGCAGTGGCTCACACCTGTAA	intronic antisense	NM_199235	COLEC11	collectin-11 isoform b	+	3642421	3692234	5.7598	7.01425
ASHGA5P018682	0.015745	0.0583541	2.38576	down	noncoding	ENST00000456450	AC010907.2	GENCODE	693	chr2	-	3650986	3651832	GCCTTCCTCGGGCGTTACAACTTGGAAAACAAGACCAGGCGCAGTGGCTCACACCTGTAA	natural antisense	NM_001255985	COLEC11	collectin-11 isoform f precursor	+	3649495	3692234	5.7598	7.01425
ASHGA5P050917	0.0298859	0.084663	2.38521	down	noncoding	ENST00000441231	PLCB1-IT1	GENCODE	373	chr20	+	8229350	8230389	ACCAAATACCCAAAAGATCTGCTTCAACCTTCCCCAGTTAATCTTTTGCCAGAAGATTCA	intron sense-overlapping	NM_015192	PLCB1	1-phosphatidylinositol 4,5-bisphosphate phosphodiesterase beta-1 isoform a	+	8113295	8865547	4.94665	6.20077
ASHGA5P050917	0.0298859	0.084663	2.38521	down	noncoding	ENST00000441231	PLCB1-IT1	GENCODE	373	chr20	+	8229350	8230389	ACCAAATACCCAAAAGATCTGCTTCAACCTTCCCCAGTTAATCTTTTGCCAGAAGATTCA	intron sense-overlapping	NM_182734	PLCB1	1-phosphatidylinositol 4,5-bisphosphate phosphodiesterase beta-1 isoform b	+	8113295	8865547	4.94665	6.20077
ASHGA5P040706	0.0295845	0.084148	2.38498	down	noncoding	NR_030583	VTRNA2-1	RefSeq	100	chr5	-	135416186	135416286	CTTTCTATCTGTCCATCTCTGTGCTGGGGTTCGAGACCCGCGGGTGCTTACTGACCCTTT	intergenic							3.94331	5.19729
ASHGA5P029115	0.00134436	0.0275475	2.38469	down	noncoding	ENST00000557160	RP11-831F12.2	GENCODE	568	chr14	-	50174384	50175510	ATAATAGTTCAAAAATAACCAGCTGGGCGCAGTGGCTCAGCCAGCATTTTGTAATCCCAG	intronic antisense	NM_172193	KLHDC1	kelch domain-containing protein 1	+	50159822	50219870	3.72662	4.98042
ASHGA5P028929	0.00891038	0.0449635	2.38441	down	noncoding	TCONS_00010505	XLOC_005024	LincRNAs identified by Cabili et al	745	chr5	-	139531023	139532171	TTAGCAAGTGCTTTTCCCACACTTGAGACTGCCTCTCTCCTCTCTAAGTCCTGGATTTTA	intergenic							6.08602	7.33965
ASHGA5P042240	0.00426066	0.0383369	2.38336	down	noncoding	ENST00000439891	RP11-203H2.1	GENCODE	527	chr6	+	8328383	8342688	GAGAGAGAGGAGGAGATTTACATCACACAGCAAACAACCTAATAAATCTGTTAAACGCCA	intergenic							3.1461	4.3991
ASHGA5P049417	0.00308454	0.0358067	2.38321	down	noncoding	TCONS_00013540	XLOC_006179	LincRNAs identified by Cabili et al	920	chr7	+	95308462	95311461	ATGCCACCAGCCAACATGGACCATAAATTAAATTTGGAATGGAAGCCACACATGACATGG	intergenic							3.75715	5.01006
ASHGA5P027363	0.0211235	0.0692181	2.38277	down	noncoding	ENST00000418525	RP11-169K16.4	GENCODE	639	chr1	-	16066545	16076391	TTCAAAGGGTGCTGCTGGAGCTGTCCAAGGGGTGGCCATTCTTCGGGGAATGAGCTGAAA	intronic antisense	NM_001013641	TMEM82	transmembrane protein 82	+	16068916	16074477	4.34379	5.59643
ASHGA5P027363	0.0211235	0.0692181	2.38277	down	noncoding	ENST00000418525	RP11-169K16.4	GENCODE	639	chr1	-	16066545	16076391	TTCAAAGGGTGCTGCTGGAGCTGTCCAAGGGGTGGCCATTCTTCGGGGAATGAGCTGAAA	natural antisense	NM_207348	SLC25A34	solute carrier family 25 member 34	+	16062808	16067884	4.34379	5.59643
ASHGA5P041011	0.0252262	0.0764506	2.38217	down	noncoding	ENST00000511821	CTD-2139B15.2	GENCODE	867	chr5	+	17354018	17355008	CCCCACTGTGAAATGACTAAAATACCATCCACCACTCCTGCTCTGAGAATTAAAAGATAA	intergenic							5.67856	6.93083
ASHGA5P000113	0.0336446	0.0911924	2.38162	down	noncoding	BF986711R		LincRNAs identified by Khalil et al	245	chr2	-	3184560	3184961	ATAGTGAGCGTCCCCGTGTCGGTGCTGGAATAGTGAGCGTCCCCGTGTCGGTGCTGGAAT	intergenic							6.90142	8.15337
ASHGA5P023338	0.000297454	0.0157153	2.38144	down	noncoding	ENST00000578803	RP11-111H3.2	GENCODE	2221	chr18	+	74331733	74335516	CCCGCCTTGCCCTGCACATGAATAACAGAGTACACCAGTCATCATAAGAAGAAAAATTCA	intergenic							6.04348	7.29532
ASHGA5P048310	0.00439179	0.0385905	2.37729	down	noncoding	ENST00000540886	RP11-167N4.2	GENCODE	371	chr11	-	73675107	73676077	TGGGATGGGGTAATAATGCCTGACCTGCCTTCCACCATTAAGATGAAGAGCTAAAACTTG	natural antisense	NM_153614	DNAJB13	dnaJ homolog subfamily B member 13	+	73661363	73681332	5.30656	6.55588
ASHGA5P054716	0.0130968	0.0528323	2.37576	down	noncoding	TCONS_00006771	XLOC_003405	LincRNAs identified by Cabili et al	9659	chr3	-	197363337	197374168	TGTTAAAGATTGAGGGTCATGCAGCTGAAGACTCTGGGAGGAGCTGACGTTCTAATTTGA	intergenic							3.37909	4.62748
ASHGA5P028516	0.0149164	0.0564865	2.37555	down	noncoding	TCONS_00010597	XLOC_004244	LincRNAs identified by Cabili et al	1623	chr5	+	1043854	1046915	TTAGTGTGTGAATGGATGAGTTAGTGTGTGAATGAGTGGGTTAGTGTGTGAATGAGTCGG	intergenic							3.57388	4.82215
ASHGA5P031038	0.00563616	0.0402473	2.3733	down	noncoding	ENST00000414816	AC012317.1	GENCODE	2907	chr16	-	24672742	24682383	TTGCACCCTCAATAAGAGTATGGTAAAGTGTGACACATTTACACTACAGAATATTATGCT	intergenic							3.54261	4.7895
ASHGA5P030842	0.0038153	0.0374162	2.37226	down	noncoding	ENST00000568884	RP11-616M22.1	GENCODE	542	chr16	-	1206975	1207974	ACACAGATCCCACCCACCTTTCTCTATAAATAAACCTGTGGAGGAGAAGCAGCGCTCGCC	intronic antisense	NM_001005407	CACNA1H	voltage-dependent T-type calcium channel subunit alpha-1H isoform b	+	1203240	1271772	5.92976	7.17602
ASHGA5P030842	0.0038153	0.0374162	2.37226	down	noncoding	ENST00000568884	RP11-616M22.1	GENCODE	542	chr16	-	1206975	1207974	ACACAGATCCCACCCACCTTTCTCTATAAATAAACCTGTGGAGGAGAAGCAGCGCTCGCC	intronic antisense	NM_021098	CACNA1H	voltage-dependent T-type calcium channel subunit alpha-1H isoform a	+	1203240	1271772	5.92976	7.17602
ASHGA5P018583	3.59918e-05	0.00861233	2.37214	down	noncoding	ENST00000455286	MEG3	GENCODE	499	chr14	+	101293747	101295643	GCGCACAGAGGGTCTCTCCTCAGGGATGACATCATCCGTCCACCTCCTTGTCTTCAAGGA	intergenic							4.60128	5.84747
ASHGA5P020872	0.0108112	0.0485311	2.37056	down	noncoding	ENST00000521213	FAM90A11P	GENCODE	485	chr8	-	7872832	7874534	TCCAATTAAAAGGTTAGGGTACGTTCCATGTCAGGTGACCAGAGGCAGTATAAAAGGCAG	intergenic							3.23077	4.47599
ASHGA5P031612	0.0111411	0.0490627	2.37028	down	noncoding	ENST00000567395	RP11-20G6.2	GENCODE	932	chr16	+	23031657	23034932	ATAGACGTTCCTGTTCCATTTGTCCCGCAAACGTTTAAACATCACACATACTTGGTTAAG	intergenic							3.33155	4.5766
ASHGA5P023200	0.00186907	0.0303713	2.36916	down	noncoding	NR_027697	FLJ39653	RefSeq	2496	chr4	+	16228285	16259810	GGTCCTGCAGTCAAAACTTCTTTGAGACGATGCTGTCGGCCTTGGCCAATCGGAGAATCG	bidirectional	NM_153365	TAPT1	transmembrane anterior posterior transformation protein 1 homolog	-	16162127	16228161	5.04277	6.28714
ASHGA5P043435	9.30032e-05	0.0119627	2.36788	down	noncoding	ENST00000451116	AC006019.4	GENCODE	3044	chr7	-	153789285	153793128	TGCCTCACGCCTGCATTTACTAACTTCAGAAGACAGGACTACCAAGTGGAAAGAAGTTGA	intronic antisense	NM_001039350	DPP6	dipeptidyl aminopeptidase-like protein 6 isoform 3	+	153584418	154685995	3.78647	5.03006
ASHGA5P043435	9.30032e-05	0.0119627	2.36788	down	noncoding	ENST00000451116	AC006019.4	GENCODE	3044	chr7	-	153789285	153793128	TGCCTCACGCCTGCATTTACTAACTTCAGAAGACAGGACTACCAAGTGGAAAGAAGTTGA	intronic antisense	NM_130797	DPP6	dipeptidyl aminopeptidase-like protein 6 isoform 1	+	153749776	154685995	3.78647	5.03006
ASHGA5P000218	0.0343273	0.0924991	2.36569	down	noncoding	chr11:8260275-8275625+	chr11:8260275-8275625	LincRNAs identified by Khalil et al	15350	chr11	+	8303699	8319049	GCATTATCACCCCCATCCATTCTTCCTAATCTAAAGAAGAGAAGGCCAAAGTGGACAACA	intergenic							6.6772	7.91946
ASHGA5P032159	0.0286606	0.0824585	2.36293	down	noncoding	ENST00000584264	CTB-104H12.4	GENCODE	489	chr17	-	10034215	10034704	GTGGCCTTGGCTTGGGTGTGGAAGTAATAGCAAACTCAGCAAGATACCTTTTATGTTTTG	intron sense-overlapping	NM_201433	GAS7	growth arrest-specific protein 7 isoform c	-	9813925	10101868	6.33227	7.57285
ASHGA5P057683	0.0132607	0.0531406	2.36265	down	noncoding	TCONS_00020708	XLOC_010005	LincRNAs identified by Cabili et al	313	chr12	-	8941100	8944136	ATAGTTGAACTCACTGCTTGGTGATAGGTGATGGTCTCGCCGCTCAGCTATAGGTGATGG	intergenic							4.02879	5.26919
ASHGA5P019919	0.00779991	0.0433457	2.36012	down	noncoding	ENST00000510754	RP11-834C11.7	pseudogene	236	chr12	-	54473050	54474072	TTCTCTCCAGGCCTCTCCACTTGCCCGAGCTCTCAGCCACCAGGAGACAGAAGGAAGGGA								6.61888	7.85773
ASHGA5P056913	0.0497078	0.117527	2.35923	down	noncoding	TCONS_00010462	XLOC_004983	LincRNAs identified by Cabili et al	387	chr5	-	124329348	124331780	AAAGGATAGTCCATCTGGATGTTTCTTTCTTTCTCCTAACTGTGACCTCAGCCTGCTCCA	intergenic							3.12836	4.36668
ASHGA5P020966	0.00624236	0.0409695	2.35842	down	noncoding	ENST00000522768	RP11-156K13.1	GENCODE	510	chr8	+	17658853	17718578	CCGGGCCGCGTCAGTCAACGAACATTCGAGATCCTGTCATGTGTCAGACACTGTGCGGAG	bidirectional	NM_001001924	MTUS1	microtubule-associated tumor suppressor 1 isoform 1	-	17501302	17658426	2.9857	4.22352
ASHGA5P020966	0.00624236	0.0409695	2.35842	down	noncoding	ENST00000522768	RP11-156K13.1	GENCODE	510	chr8	+	17658853	17718578	CCGGGCCGCGTCAGTCAACGAACATTCGAGATCCTGTCATGTGTCAGACACTGTGCGGAG	bidirectional	NM_001001925	MTUS1	microtubule-associated tumor suppressor 1 isoform 2	-	17501302	17658426	2.9857	4.22352
ASHGA5P020419	0.00422123	0.0382095	2.35695	down	noncoding	ENST00000513255	RP11-18D7.2	GENCODE	444	chr4	-	183693717	183695084	GTCCATGTCCCCATGCAGCACCAGAGAAAATTTCAAAAATGATGGTGTCGTCTGAAGAAA	natural antisense	NM_001080477	ODZ3	teneurin-3	+	183245136	183724177	5.72657	6.96349
ASHGA5P041023	0.00350614	0.0362361	2.35597	down	noncoding	uc003jgn.3	PMCHL1	UCSC_knowngene	611	chr5	+	22142460	22152379	ACCCTCCTTGGTTTACCTCCATCATTAAAAAACAACAATGACAACGACAACAAAAAACAA	intronic antisense	NM_004061	CDH12	cadherin-12 preproprotein	-	21750972	22853731	4.95643	6.19276
ASHGA5P029577	2.26419e-05	0.00861233	2.3538	down	noncoding	TCONS_00008899	XLOC_003712	LincRNAs identified by Cabili et al	370	chr4	+	140489779	140497511	TGTGATGGGGGTGGCTCCTGGGTCTCATGGAGTTCCTCAGAGAGCTTCTGCCTGAGTTAT	intergenic							5.01032	6.24531
ASHGA5P049108	0.00606477	0.0406656	2.35184	down	noncoding	uc021ten.1	AK303572	UCSC_knowngene	1235	chr16	+	21415569	21416917	GGGAATGTTTTCACACATATTCATTTGATGGACAAAATTACCGCCACCAACACAGTCTGC	natural antisense	NM_130464	NPIPL3	putative NPIP-like protein KIAA0220-like	-	21413454	21436658	3.41205	4.64584
ASHGA5P007456	0.0186343	0.0640863	2.35177	down	noncoding	uc002tjq.4	LOC654433	UCSC_knowngene	2328	chr2	+	113993106	114024580	ATGGCGAAGGGCCAGGGCCCCACACCTTCCGCCTGACAGCCAGCCAAGCTCTTCAGTCCC	intronic antisense	NM_013953	PAX8	paired box protein Pax-8 isoform PAX8D	-	113973573	114036498	4.78081	6.01455
ASHGA5P007456	0.0186343	0.0640863	2.35177	down	noncoding	uc002tjq.4	LOC654433	UCSC_knowngene	2328	chr2	+	113993106	114024580	ATGGCGAAGGGCCAGGGCCCCACACCTTCCGCCTGACAGCCAGCCAAGCTCTTCAGTCCC	intronic antisense	NM_013992	PAX8	paired box protein Pax-8 isoform PAX8E	-	113973573	114036498	4.78081	6.01455
ASHGA5P007456	0.0186343	0.0640863	2.35177	down	noncoding	uc002tjq.4	LOC654433	UCSC_knowngene	2328	chr2	+	113993106	114024580	ATGGCGAAGGGCCAGGGCCCCACACCTTCCGCCTGACAGCCAGCCAAGCTCTTCAGTCCC	natural antisense	NM_003466	PAX8	paired box protein Pax-8 isoform PAX8A	-	113973573	114036498	4.78081	6.01455
ASHGA5P007456	0.0186343	0.0640863	2.35177	down	noncoding	uc002tjq.4	LOC654433	UCSC_knowngene	2328	chr2	+	113993106	114024580	ATGGCGAAGGGCCAGGGCCCCACACCTTCCGCCTGACAGCCAGCCAAGCTCTTCAGTCCC	natural antisense	NM_013952	PAX8	paired box protein Pax-8 isoform PAX8C	-	113973573	114036498	4.78081	6.01455
ASHGA5P030212	0.00562547	0.0402473	2.34945	down	noncoding	uc002bke.2	DQ586822	UCSC_knowngene	2994	chr15	-	84944255	84947249	AACAACTGTACAAGGTGTTGTCACAATCAGTTAGTGACTGAGAGGGATTGATATCATGGA	intergenic							4.52382	5.75614
ASHGA5P040104	0.00698431	0.0420969	2.34908	down	noncoding	ENST00000445662	AL583842.1	GENCODE	965	chr1	+	142553292	142559170	CCACAGTGGGTTAGTGGATATTACAAAACCTCTGGTCCCACCTTATTAAGATGGAAAAAA	intergenic							4.58246	5.81455
ASHGA5P029522	0.0170441	0.0608926	2.34741	down	noncoding	ENST00000556620	RP11-111A21.1	GENCODE	857	chr14	+	39944059	39961974	GGACTTTCCCCTCACCTCCCAAATGTTTATTATGAAAAATTTCATTTTAAAGAAAGGTGG	intergenic							7.37112	8.6022
ASHGA5P033719	0.00964882	0.0463618	2.34693	down	noncoding	TCONS_00028355	XLOC_013708	LincRNAs identified by Cabili et al	1679	chr20	-	25730058	25732440	TTAATAACAAGTCAGTTGAAAGCCCTGCCTTGCCAGTTTCCACAGTCACAATGTGGCCTT	intergenic							4.4643	5.69508
ASHGA5P026771	7.665e-08	0.00070679	2.34691	down	noncoding	uc001pkv.1	AK124179	UCSC_knowngene	2086	chr11	+	110199129	110278336	AGATTCCTTTTCCTCAGCCGGGCACAGAGCCAACCTGAAGTGTAGCACTGTGGTGACCTG	intergenic							2.90346	4.13423
ASHGA5P026024	0.00812028	0.0437937	2.3462	down	noncoding	NR_073068	BCL2L13	RefSeq	4730	chr22	+	18138427	18213621	TTCCTCACCCCAAGAGTCTCTCTCTTGCCCAGGCTGGTGTGCAGTGTTGAGAACACAGCT	exon sense-overlapping	NM_001270726	BCL2L13	bcl-2-like protein 13 isoform b	+	18121349	18213621	5.72982	6.96015
ASHGA5P026024	0.00812028	0.0437937	2.3462	down	noncoding	NR_073068	BCL2L13	RefSeq	4730	chr22	+	18138427	18213621	TTCCTCACCCCAAGAGTCTCTCTCTTGCCCAGGCTGGTGTGCAGTGTTGAGAACACAGCT	exon sense-overlapping	NM_001270727	BCL2L13	bcl-2-like protein 13 isoform c	+	18121349	18213621	5.72982	6.96015
ASHGA5P026024	0.00812028	0.0437937	2.3462	down	noncoding	NR_073068	BCL2L13	RefSeq	4730	chr22	+	18138427	18213621	TTCCTCACCCCAAGAGTCTCTCTCTTGCCCAGGCTGGTGTGCAGTGTTGAGAACACAGCT	exon sense-overlapping	NM_001270728	BCL2L13	bcl-2-like protein 13 isoform d	+	18121349	18213621	5.72982	6.96015
ASHGA5P026024	0.00812028	0.0437937	2.3462	down	noncoding	NR_073068	BCL2L13	RefSeq	4730	chr22	+	18138427	18213621	TTCCTCACCCCAAGAGTCTCTCTCTTGCCCAGGCTGGTGTGCAGTGTTGAGAACACAGCT	exon sense-overlapping	NM_001270729	BCL2L13	bcl-2-like protein 13 isoform e	+	18121349	18213621	5.72982	6.96015
ASHGA5P026024	0.00812028	0.0437937	2.3462	down	noncoding	NR_073068	BCL2L13	RefSeq	4730	chr22	+	18138427	18213621	TTCCTCACCCCAAGAGTCTCTCTCTTGCCCAGGCTGGTGTGCAGTGTTGAGAACACAGCT	exon sense-overlapping	NM_001270730	BCL2L13	bcl-2-like protein 13 isoform e	+	18121349	18213621	5.72982	6.96015
ASHGA5P026024	0.00812028	0.0437937	2.3462	down	noncoding	NR_073068	BCL2L13	RefSeq	4730	chr22	+	18138427	18213621	TTCCTCACCCCAAGAGTCTCTCTCTTGCCCAGGCTGGTGTGCAGTGTTGAGAACACAGCT	exon sense-overlapping	NM_001270731	BCL2L13	bcl-2-like protein 13 isoform e	+	18121349	18213621	5.72982	6.96015
ASHGA5P026024	0.00812028	0.0437937	2.3462	down	noncoding	NR_073068	BCL2L13	RefSeq	4730	chr22	+	18138427	18213621	TTCCTCACCCCAAGAGTCTCTCTCTTGCCCAGGCTGGTGTGCAGTGTTGAGAACACAGCT	exon sense-overlapping	NM_001270732	BCL2L13	bcl-2-like protein 13 isoform f	+	18121349	18213621	5.72982	6.96015
ASHGA5P026024	0.00812028	0.0437937	2.3462	down	noncoding	NR_073068	BCL2L13	RefSeq	4730	chr22	+	18138427	18213621	TTCCTCACCCCAAGAGTCTCTCTCTTGCCCAGGCTGGTGTGCAGTGTTGAGAACACAGCT	exon sense-overlapping	NM_001270733	BCL2L13	bcl-2-like protein 13 isoform g	+	18189423	18213621	5.72982	6.96015
ASHGA5P026024	0.00812028	0.0437937	2.3462	down	noncoding	NR_073068	BCL2L13	RefSeq	4730	chr22	+	18138427	18213621	TTCCTCACCCCAAGAGTCTCTCTCTTGCCCAGGCTGGTGTGCAGTGTTGAGAACACAGCT	exon sense-overlapping	NM_001270734	BCL2L13	bcl-2-like protein 13 isoform h	+	18121349	18213621	5.72982	6.96015
ASHGA5P026024	0.00812028	0.0437937	2.3462	down	noncoding	NR_073068	BCL2L13	RefSeq	4730	chr22	+	18138427	18213621	TTCCTCACCCCAAGAGTCTCTCTCTTGCCCAGGCTGGTGTGCAGTGTTGAGAACACAGCT	exon sense-overlapping	NM_001270735	BCL2L13	bcl-2-like protein 13 isoform i	+	18121349	18213621	5.72982	6.96015
ASHGA5P026024	0.00812028	0.0437937	2.3462	down	noncoding	NR_073068	BCL2L13	RefSeq	4730	chr22	+	18138427	18213621	TTCCTCACCCCAAGAGTCTCTCTCTTGCCCAGGCTGGTGTGCAGTGTTGAGAACACAGCT	exon sense-overlapping	NM_015367	BCL2L13	bcl-2-like protein 13 isoform a	+	18121349	18213621	5.72982	6.96015
ASHGA5P051242	9.39595e-06	0.00758285	2.3459	down	noncoding	ENST00000415114	CES5AP1	GENCODE	974	chr22	-	23712281	23729918	ATGGGAGTTTGGGGGATCTCGGTGGCTGAGGGCTGTGCTCATGAAGGACTCCTTGAGTTT	intergenic							4.53825	5.76839
ASHGA5P057410	0.000948534	0.0254257	2.34508	down	noncoding	TCONS_00016511	XLOC_007895	LincRNAs identified by Cabili et al	461	chr9	-	139159243	139166900	CCACACCCAGGTCACACCCGCCTCTGGACACAGATGCTGCCACGTCCTCCCAGGGTCCCG	intergenic							7.18705	8.41668
ASHGA5P000132	0.00192674	0.0307379	2.34217	down	noncoding	CF887556		LincRNAs identified by Khalil et al	598	chr10	-	74076171	74080303	TCACTTACTGGGTCTCTGGTCCTGCCTGTGTGCTGTGCTATATCTGAGCATGCTGCCAGG	intergenic							5.34482	6.57267
ASHGA5P043143	0.0190067	0.0648394	2.34187	down	noncoding	ENST00000458474	AC004878.7	GENCODE	307	chr7	-	74856620	74857439	TCCACTCTGGCTCTGTCTACTCCCTTCCCAACACATGCCCTATTTTAGGTAACCATGGTA	intron sense-overlapping	NM_001145064	GATSL2	GATS-like protein 2	-	74807604	74867341	8.05806	9.28572
ASHGA5P016342	0.00311899	0.0358067	2.34057	down	noncoding	ENST00000429532	AC093415.2	GENCODE	475	chr3	-	37850213	37903211	CTGTCCCTGGCCTAAGCCACCACATAAAAAGTCAGACCATCTGCTGGAAGAACCACATGG	natural antisense	NM_002207	ITGA9	integrin alpha-9 precursor	+	37493812	37861281	4.49193	5.71878
ASHGA5P034480	0.0015693	0.0287114	2.34016	down	noncoding	ENST00000414548	CTD-2192J16.11	GENCODE	543	chr19	+	12663410	12664458	CTTCAATCCCCTTTGCTGTTTGTTTGTTTTTAAGAAACTAGCAGAGTTCCTGCTTTCCTT	intergenic							4.8406	6.06721
ASHGA5P029317	0.0435237	0.107711	2.33968	down	noncoding	TCONS_00010873	XLOC_004700	LincRNAs identified by Cabili et al	715	chr5	-	1041183	1045593	TCACTCACTAATTTACACCAAGTCACTCCCACTCATTCAGATACAGGCTGGTCCAGCGAC	intergenic							4.20627	5.43258
ASHGA5P034362	0.000501734	0.0195211	2.33902	down	noncoding	NR_027135	ZSCAN18	RefSeq	1778	chr19	-	58618971	58629793	GCCTCCTCTTTGTCAGAGACTTCATGTTGAAGAGTTTATGTTGTTTGAAAGTAACAAATA	exon sense-overlapping	NM_001145542	ZSCAN18	zinc finger and SCAN domain-containing protein 18 isoform 1	-	58595208	58629793	3.26175	4.48766
ASHGA5P031346	0.0296634	0.0842397	2.33581	down	noncoding	ENST00000562565	RP11-543N12.1	GENCODE	563	chr16	-	83416620	83431775	AAATCTGATTCTCCTCCTTCAATTACTGCTTATCTTCAGAAAAGCCATGCACCTCACGAA	intronic antisense	NM_001220488	CDH13	cadherin-13 isoform 2	+	82660398	83830215	4.61909	5.84301
ASHGA5P031346	0.0296634	0.0842397	2.33581	down	noncoding	ENST00000562565	RP11-543N12.1	GENCODE	563	chr16	-	83416620	83431775	AAATCTGATTCTCCTCCTTCAATTACTGCTTATCTTCAGAAAAGCCATGCACCTCACGAA	intronic antisense	NM_001220489	CDH13	cadherin-13 isoform 3 precursor	+	82660398	83830215	4.61909	5.84301
ASHGA5P031346	0.0296634	0.0842397	2.33581	down	noncoding	ENST00000562565	RP11-543N12.1	GENCODE	563	chr16	-	83416620	83431775	AAATCTGATTCTCCTCCTTCAATTACTGCTTATCTTCAGAAAAGCCATGCACCTCACGAA	intronic antisense	NM_001220490	CDH13	cadherin-13 isoform 4	+	82660398	83830215	4.61909	5.84301
ASHGA5P031346	0.0296634	0.0842397	2.33581	down	noncoding	ENST00000562565	RP11-543N12.1	GENCODE	563	chr16	-	83416620	83431775	AAATCTGATTCTCCTCCTTCAATTACTGCTTATCTTCAGAAAAGCCATGCACCTCACGAA	intronic antisense	NM_001257	CDH13	cadherin-13 isoform 1 preproprotein	+	82660398	83830215	4.61909	5.84301
ASHGA5P022419	2.11643e-05	0.00861233	2.33555	down	noncoding	ENST00000556407	MEG3	GENCODE	632	chr14	+	101245746	101295522	TTTCCATCTGGGTCTCTCCTCAGGGATGACATCATCCGTCCACCTCCTTGTCTTCAAGGA	intergenic							4.97807	6.20183
ASHGA5P056708	0.00213611	0.0314014	2.33472	down	noncoding	TCONS_00007969	XLOC_003438	LincRNAs identified by Cabili et al	2596	chr4	+	6315485	6319667	GTGGCTGGGCGTGGTTATCTCTTTTTCTCACCTATTTTCTTTGGGATTCTCTTTGATATT	intergenic							4.7232	5.94645
ASHGA5P051533	0.0010809	0.0258808	2.33356	down	noncoding	ENST00000425674	RP11-493K19.3	GENCODE	565	chr3	-	50155597	50193453	TACCCAGCAGGACCACCCACCAGGAGACAGAAGAGAGAAAACTGTATATGAAGACAAGGA	intronic antisense	NM_004186	SEMA3F	semaphorin-3F precursor	+	50192847	50226508	5.01626	6.23879
ASHGA5P051533	0.0010809	0.0258808	2.33356	down	noncoding	ENST00000425674	RP11-493K19.3	GENCODE	565	chr3	-	50155597	50193453	TACCCAGCAGGACCACCCACCAGGAGACAGAAGAGAGAAAACTGTATATGAAGACAAGGA	natural antisense	NM_005778	RBM5	RNA-binding protein 5	+	50126340	50156397	5.01626	6.23879
ASHGA5P031556	0.00735749	0.0427228	2.33307	down	noncoding	ENST00000566734	RP11-1021N1.2	GENCODE	549	chr16	+	15506576	15507125	GATTTTGATGTTGCATTTGGCTACATTTAATCCACTTTCACCCATAAGGTTTAGCATCTA	intron sense-overlapping	ENST00000568766	RP11-1021N1.1	Uncharacterized protein [Source:UniProtKB/TrEMBL;Acc:H3BMD7]	+	15489610	15609205	3.66296	4.8852
ASHGA5P050755	0.0138174	0.0543327	2.33138	down	noncoding	ENST00000484406	AC007163.4	GENCODE	669	chr2	+	201560561	201596038	CTGTTCCCAGGTAGGCTGCATCCCTGCCACTTCCTCCTCCTGTCCTGTACAACCTAGGGC	intergenic							7.87686	9.09805
ASHGA5P030023	0.00310339	0.0358067	2.32975	down	noncoding	uc001zyw.1	AK091906	UCSC_knowngene	1973	chr15	-	51132072	51144737	CAAAAATGATTTGAAGATCATCAGGCCACCACTCCCACCATAGGAACAGAGGACCTAACT	intergenic							5.31149	6.53167
ASHGA5P030354	0.0225099	0.0715542	2.32819	down	noncoding	ENST00000568541	RP11-580I1.1	GENCODE	556	chr15	+	24451930	24471001	GCGAAAGTTAATATTATCCAGCCAGCCCAGAGTCCTTTCAACCATCCTGTATGACAACTA	intergenic							4.87482	6.09403
ASHGA5P050577	0.0122483	0.051129	2.32808	down	noncoding	NR_047658	KANSL3	RefSeq	4994	chr2	-	97258891	97303797	GCGGCTCCTCCTCGTCGCGAACTCTGGATGACCTTGGCCAAATCGCTTCAGTTCCCCGAG	exon sense-overlapping	NM_001115016	KANSL3	KAT8 regulatory NSL complex subunit 3	-	97258891	97304116	7.44704	8.66618
ASHGA5P023859	0.00694654	0.0420215	2.32534	down	noncoding	HMlincRNA773-	HMlincRNA773	LincRNAs identified by Khalil et al	9029	chr5	-	124759910	124768939	CACACCCACAATCCCTTTATGTATGTACACATCATTATCTGTGTATATGTAGAAAGCTAT	intergenic							3.7502	4.96764
ASHGA5P032498	0.021192	0.0693417	2.32506	down	noncoding	ENST00000582142	RP11-6N17.6	GENCODE	473	chr17	-	46024920	46025641	CTATTGGTACCAGCACATGAAGCCCTTCTACAAAATTCCTGACGGACTGGGAATAAAAAT	natural antisense	NM_018129	PNPO	pyridoxine-5'-phosphate oxidase	+	46018888	46026674	5.63119	6.84846
ASHGA5P051026	0.000160532	0.0135265	2.32278	down	noncoding	ENST00000427333	RP11-112L6.4	GENCODE	503	chr20	+	48789086	48789907	ACCAGCCCCTCCAGCTTAGAGGTGGCAGTGGCTCTCTGCGGCTGCGATTTCTTTCTCGGA	intergenic							5.04072	6.25657
ASHGA5P035972	0.0467806	0.112686	2.32127	down	noncoding	ENST00000455121	AC105053.4	GENCODE	783	chr2	+	86116402	86118103	GAATCACAAGACATCTGTTAAGCCCTTACTACCTCATTCACTCCACTCACATTAGGTTGA	bidirectional	NM_003896	ST3GAL5	lactosylceramide alpha-2,3-sialyltransferase isoform 1	-	86066270	86116157	6.14748	7.3624
ASHGA5P036311	0.018431	0.0638198	2.31681	down	noncoding	ENST00000447478	RP4-534N18.2	GENCODE	517	chr1	+	32398620	32399576	CTCTACCATCACCCTATTCGATAAACATAACTAAGTCCACCATGTTAAAACTATGGATCC	intronic antisense	NM_080391	PTP4A2	protein tyrosine phosphatase type IVA 2 isoform 1	-	32372021	32403988	4.9206	6.13274
ASHGA5P035160	0.00231622	0.0321655	2.3159	down	noncoding	ENST00000449242	AC012307.2	GENCODE	197	chr2	-	96811340	96812751	GGCTCTGACCCCAGCACACACAAGCTCCAGCTCCTTCTCACACATAGTGGAACTGCACAG	intergenic							9.51876	10.7303
ASHGA5P045074	0.000633998	0.0213415	2.31151	down	noncoding	ENST00000529247	RP11-661A12.7	GENCODE	431	chr8	+	144661805	144662840	ATCTTGTTGAAAGCTGCGATATCGACACTCTGCACCTGAGGAGAGGCGGAGGGTGACGGT	natural antisense	NM_001130053	EEF1D	elongation factor 1-delta isoform 1	-	144661866	144679845	4.9057	6.11453
ASHGA5P045074	0.000633998	0.0213415	2.31151	down	noncoding	ENST00000529247	RP11-661A12.7	GENCODE	431	chr8	+	144661805	144662840	ATCTTGTTGAAAGCTGCGATATCGACACTCTGCACCTGAGGAGAGGCGGAGGGTGACGGT	natural antisense	NM_001130055	EEF1D	elongation factor 1-delta isoform 2	-	144661866	144679845	4.9057	6.11453
ASHGA5P045074	0.000633998	0.0213415	2.31151	down	noncoding	ENST00000529247	RP11-661A12.7	GENCODE	431	chr8	+	144661805	144662840	ATCTTGTTGAAAGCTGCGATATCGACACTCTGCACCTGAGGAGAGGCGGAGGGTGACGGT	natural antisense	NM_001130056	EEF1D	elongation factor 1-delta isoform 4	-	144661866	144679845	4.9057	6.11453
ASHGA5P045074	0.000633998	0.0213415	2.31151	down	noncoding	ENST00000529247	RP11-661A12.7	GENCODE	431	chr8	+	144661805	144662840	ATCTTGTTGAAAGCTGCGATATCGACACTCTGCACCTGAGGAGAGGCGGAGGGTGACGGT	natural antisense	NM_001130057	EEF1D	elongation factor 1-delta isoform 2	-	144661866	144679558	4.9057	6.11453
ASHGA5P045074	0.000633998	0.0213415	2.31151	down	noncoding	ENST00000529247	RP11-661A12.7	GENCODE	431	chr8	+	144661805	144662840	ATCTTGTTGAAAGCTGCGATATCGACACTCTGCACCTGAGGAGAGGCGGAGGGTGACGGT	natural antisense	NM_001195203	EEF1D	elongation factor 1-delta isoform 5	-	144661866	144679845	4.9057	6.11453
ASHGA5P045074	0.000633998	0.0213415	2.31151	down	noncoding	ENST00000529247	RP11-661A12.7	GENCODE	431	chr8	+	144661805	144662840	ATCTTGTTGAAAGCTGCGATATCGACACTCTGCACCTGAGGAGAGGCGGAGGGTGACGGT	natural antisense	NM_001960	EEF1D	elongation factor 1-delta isoform 2	-	144661866	144679845	4.9057	6.11453
ASHGA5P045074	0.000633998	0.0213415	2.31151	down	noncoding	ENST00000529247	RP11-661A12.7	GENCODE	431	chr8	+	144661805	144662840	ATCTTGTTGAAAGCTGCGATATCGACACTCTGCACCTGAGGAGAGGCGGAGGGTGACGGT	natural antisense	NM_032378	EEF1D	elongation factor 1-delta isoform 1	-	144661866	144679845	4.9057	6.11453
ASHGA5P039973	0.000174468	0.0136631	2.31071	down	noncoding	TCONS_00022898	XLOC_011152	LincRNAs identified by Cabili et al	2388	chr14	-	105532037	105540262	AGAGGCTGTCCCATCCCAGCTGCACACCATTCTCATTGAAGTGAAAAGGCTGCCTCCCGA	intergenic							5.15867	6.36701
ASHGA5P030207	0.00410481	0.0377672	2.31034	down	noncoding	TCONS_00008622	XLOC_004122	LincRNAs identified by Cabili et al	886	chr4	-	152326702	152329162	TTCTTCCCTTCATTCTCGGTGAATGGCATCCAGAGATAACCAAAATCAGGTGTATCTAGT	intergenic							3.11329	4.3214
ASHGA5P014580	0.0290606	0.0832281	2.3092	down	noncoding	ENST00000411525	LINC00422	GENCODE	664	chr13	-	21899763	21922860	ATTCTTCCTAGATGATGCCGTCTGCCACGGGTCCCTTCCTCTCTCCAGCTGTCTGGAATG	intergenic							6.41036	7.61776
ASHGA5P058843	0.00265193	0.03424	2.3088	down	noncoding	uc.118+	uc.118	UCR	219	chr3	+	70872091	70872310	TAACTGGCTAATCTTTTTATTTTATTTCTGAGCCTCCATGCAATAGGCGGTTTAGTTATG	intergenic							4.87756	6.0847
ASHGA5P040146	0.016853	0.0605382	2.30596	down	noncoding	ENST00000438000	BX571672.1	GENCODE	1786	chr1	+	143119060	143233417	ACACTTGTGTGTATGCTTTAGATCCTGTTTTTTGTTGTTGTTGTTTTGGTTTGGTTTGGT	intergenic							4.00051	5.20587
ASHGA5P035910	0.0338899	0.0916151	2.30419	down	noncoding	TCONS_00026944	XLOC_013005	LincRNAs identified by Cabili et al	2332	chr19	+	21155028	21167734	TTGTTTTACTCCTGTGCCCTTTATGAATGAGTGATGATCATCTTAAAAATCAGGATGTTC	intergenic							3.59068	4.79493
ASHGA5P028634	0.00687584	0.0420015	2.30416	down	noncoding	ENST00000419027	BX004987.4	GENCODE	837	chr1	-	143464644	143467613	CTCATGGATGAAACCCGGAACATCTTGAGGACTGAGTTAACCACAGGTCCTTAAATAACT	intergenic							3.23679	4.44103
ASHGA5P023883	0.00376955	0.0371755	2.30355	down	noncoding	HMlincRNA825-	HMlincRNA825	LincRNAs identified by Khalil et al	5120	chr10	-	102419790	102424910	CCAGACACATGCACTCACACTGTCTGCCCTGTGACATCTTCATGTAGATATACATGCATT	intergenic							4.88324	6.0871
ASHGA5P022155	0.042371	0.105957	2.30355	down	noncoding	ENST00000550680	RP11-1103G16.1	GENCODE	471	chr14	-	30907211	30943433	TTTTTGCTGCTTCTTTCCCTACCTCCTCATTTCCGAAGAACTAAGGTTAAACCATGACCA	intergenic							5.37817	6.58203
ASHGA5P030515	0.00410951	0.0377672	2.30258	down	noncoding	ENST00000557965	RP11-96O20.2	GENCODE	431	chr15	+	45850795	45855075	TTTTATCTTTTTTTGCAGGGGGAAGGCAGAGTCTCATTCTGTCACCCAGGTTAGAGTGCA	intergenic							4.21553	5.41878
ASHGA5P032989	0.000632197	0.0213415	2.30094	down	noncoding	ENST00000579673	RP11-20B24.7	GENCODE	562	chr17	+	27219486	27220360	ATTCTTTCTAACCCAACTTGCTTTCCCTTTCCACAATTGAGCTGAAGAACCACAAAATAC	intronic antisense	NM_004475	FLOT2	flotillin-2	-	27206356	27224715	3.8348	5.03703
ASHGA5P033551	0.00029582	0.0157153	2.29752	down	noncoding	ENST00000425514	RP11-561I11.3	GENCODE	462	chr1	-	242366856	242373825	GAACACCACCGCAGGCTTTCCACACAGGGGTCTGGATTTGTCTGTGAAATTCAGGAGCTC	intron sense-overlapping	NM_001195811	PLD5	inactive phospholipase D5 isoform 2	-	242251688	242612784	3.41639	4.61647
ASHGA5P033551	0.00029582	0.0157153	2.29752	down	noncoding	ENST00000425514	RP11-561I11.3	GENCODE	462	chr1	-	242366856	242373825	GAACACCACCGCAGGCTTTCCACACAGGGGTCTGGATTTGTCTGTGAAATTCAGGAGCTC	intron sense-overlapping	NM_001195812	PLD5	inactive phospholipase D5 isoform 3	-	242251688	242612784	3.41639	4.61647
ASHGA5P033551	0.00029582	0.0157153	2.29752	down	noncoding	ENST00000425514	RP11-561I11.3	GENCODE	462	chr1	-	242366856	242373825	GAACACCACCGCAGGCTTTCCACACAGGGGTCTGGATTTGTCTGTGAAATTCAGGAGCTC	intron sense-overlapping	NM_152666	PLD5	inactive phospholipase D5 isoform 1	-	242251688	242687998	3.41639	4.61647
ASHGA5P028576	0.00441112	0.0386604	2.29646	down	noncoding	ENST00000424640	RP11-423O2.7	GENCODE	967	chr1	-	142950834	142956716	TCCACAGTGGGTTAGTGGATATTACAAACCTCTGGTCCCACCTTATTAAGATGGAAAAAA	intergenic							4.58124	5.78065
ASHGA5P053164	0.0122176	0.0510691	2.2957	down	noncoding	ENST00000452471	AC005009.2	GENCODE	687	chr7	-	86413541	86415908	AGTTATATTAATCAGGACCTGAACCCCTCAGGGAGACAGAGAATGAAAGGACCTAAAAAA	natural antisense	NM_000840	GRM3	metabotropic glutamate receptor 3 precursor	+	86273229	86494192	8.66023	9.85916
ASHGA5P055397	0.0280157	0.0813391	2.29537	down	noncoding	TCONS_00028418	XLOC_013771	LincRNAs identified by Cabili et al	4712	chr20	-	46523115	46528274	GAACAAGACTTCTCCTCCCCAGGGTGCCAGCTACCGGACCTTCAACTTACATCAACATTG	intergenic							6.53258	7.7313
ASHGA5P040172	0.0309661	0.0865529	2.2951	down	noncoding	ENST00000415543	BX004987.5	GENCODE	661	chr1	+	143392449	143394444	AGAAGAATATAAGGAAGCCTTTGCAGCAGCATTGAAAGCTAACAGTTCCATGTCAAAAAA	intergenic							3.85579	5.05435
ASHGA5P027857	1.7415e-06	0.00382135	2.29304	down	noncoding	ENST00000437400	RP11-293A10.3	GENCODE	444	chr1	-	109276877	109278894	GCCCACTCATATTGCCAAGCCTAGCTTGTGATTTATAAATTTATTTTTTCTGATCCTCTA	intronic antisense	NM_001144937	FNDC7	fibronectin type III domain-containing protein 7 precursor	+	109255555	109285367	2.94673	4.14399
ASHGA5P043052	0.0257987	0.0770101	2.29265	down	noncoding	ENST00000413357	SEPT7P2	GENCODE	487	chr7	-	45765643	45768589	AGAGCCCTTCTAAGTTGTAAGATCTGAAAGAAATGTCTGCCATCTATATTCTCAGCCACA	intergenic							4.25467	5.45169
ASHGA5P044971	0.0441702	0.108844	2.29093	down	noncoding	ENST00000521904	RP11-1101K5.1	GENCODE	477	chr8	+	112388867	112482846	CTAAACTAACTACAAGCTCCTCCACATTATCAGGACAAACACAATTCTAACTCTCAAAAG	intergenic							3.46294	4.65888
ASHGA5P017376	0.000160223	0.0135265	2.28828	down	noncoding	ENST00000440809	CRYGEP	GENCODE	423	chr2	-	208973040	208977232	CATCCCCCACGCCAGCTCCCACAGGCTCAGGATCTATGAGCGAGAGGACTACAGGGGCCA	intergenic							7.76232	8.95659
ASHGA5P047239	0.020086	0.0671305	2.28798	down	noncoding	ENST00000417112	RP11-554I8.2	GENCODE	917	chr10	+	6779343	6780988	TGACTTTTGGAAATCTGATTGACTGGCACACTCTCTCTGCCTCTTTCTTTCTCAACATTT	intergenic							5.79039	6.98446
ASHGA5P030546	0.0172748	0.0611718	2.28731	down	noncoding	ENST00000561207	RP11-430B1.1	GENCODE	381	chr15	+	52325903	52327822	GGGTTAATAGGCTTTGTTTTTTATTTTATTTTTTCCTTATTTTCTTTTTGGGTTGATAGT	intron sense-overlapping	NM_002748	MAPK6	mitogen-activated protein kinase 6	+	52311410	52358462	4.32142	5.51508
ASHGA5P020307	0.000838668	0.0241667	2.28652	down	noncoding	ENST00000511287	RP11-71E19.5	GENCODE	360	chr3	-	126111875	126113240	TACAGACCAGGGTACTGTTCCACGCACTTGACACCAATCCACCCATTTCACCTGCATGAT	bidirectional	NM_182628	CCDC37	coiled-coil domain-containing protein 37	+	126113781	126155398	6.5334	7.72656
ASHGA5P048833	0.0046534	0.0389021	2.28469	down	noncoding	uc010blu.2	LOC727849	UCSC_knowngene	2449	chr15	-	82764077	82798350	TGGAATCCAGTCCCATTTCCTTCCTGGCCACGCCTGTCCAGCGGCCTCTTCAGCCGCATT	intergenic							4.95232	6.14432
ASHGA5P038766	0.00569745	0.0402776	2.28434	down	noncoding	TCONS_00023799	XLOC_011592	LincRNAs identified by Cabili et al	1951	chr15	-	95752084	95803761	ACCAGCCCTTATATTTCCTTTAAGAAGACTCACCTAATTTAGGTCATATATCTCAAAGTG	intergenic							5.55213	6.74391
ASHGA5P055594	0.0368754	0.0972341	2.2831	down	noncoding	ENST00000550185	RP11-626I20.3	GENCODE	3059	chr12	+	103941571	103953593	GACTGGGATTTTTTTAAAGCTCTCTTCCCTTCCCCACCTTGAGTGTACAATGGAGAGTGC	intergenic							8.02856	9.21955
ASHGA5P043588	0.00193326	0.0307408	2.28005	down	noncoding	NR_034097	JAZF1-AS1	RefSeq	1194	chr7	+	28220075	28280996	ATGGAAGACTGACTCTGCACCATGCTCTGTGACAAAAGGCTTCAAGATTAAACCGGTTTG	natural antisense	NM_175061	JAZF1	juxtaposed with another zinc finger protein 1	-	27870192	28220437	3.30573	4.49479
ASHGA5P042176	0.000242896	0.0148328	2.27832	down	noncoding	TCONS_00020815	XLOC_010104	LincRNAs identified by Cabili et al	500	chr12	-	58488695	58491865	ACAAGTTCCACCCACTGCCTGAGAGTCCTGCCCTGAATTTTAGACTTTGATCATAAAAAA	intergenic							6.86244	8.05041
ASHGA5P037974	0.00504001	0.039342	2.27648	down	noncoding	ENST00000428838	RP5-1177I5.3	GENCODE	498	chr22	+	37946032	37947742	CTGTGTCTGGCAATCAGGAGATGCTCAGTTAATGCTCCTCCTGCTTCTGCTCTTCTTCTT	intergenic							3.66927	4.85607
ASHGA5P019415	0.000450932	0.0186459	2.27593	down	noncoding	ENST00000483163	AC008888.7	GENCODE	277	chr19	+	49141327	49183482	TCCTCGAAGGGGAGTCTCAGCGACCATGGGGGACACCATCCACTCCGTCAAGGGATTCTG	intronic antisense	NM_145807	NTN5	netrin-5 precursor	-	49164663	49176264	3.99969	5.18615
ASHGA5P019415	0.000450932	0.0186459	2.27593	down	noncoding	ENST00000483163	AC008888.7	GENCODE	277	chr19	+	49141327	49183482	TCCTCGAAGGGGAGTCTCAGCGACCATGGGGGACACCATCCACTCCGTCAAGGGATTCTG	natural antisense	NM_001217	CA11	carbonic anhydrase-related protein 11 precursor	-	49141271	49149451	3.99969	5.18615
ASHGA5P056849	3.33455e-05	0.00861233	2.27395	down	noncoding	TCONS_00009859	XLOC_004271	LincRNAs identified by Cabili et al	607	chr5	+	6586436	6587959	TATTCACCAGGATTCTGCCATGATTGCCACCTCTGGAGACGTCACAGCCAGCACAGCCAT	intergenic							2.98722	4.17242
ASHGA5P020330	0.0202152	0.0673695	2.27343	down	noncoding	ENST00000511707	RP11-267A15.1	GENCODE	564	chr5	+	173930817	173947668	ATAAATATTCGTTGCTTCCTGAGAACCCCACTGCGGATGAGAACAAACGTTTGTTCGGCT	intergenic							6.16388	7.34875
ASHGA5P046699	0.00821771	0.0439278	2.27323	down	noncoding	uc004fec.1	LOC100272228	UCSC_knowngene	2509	chrX	+	149113850	149121272	TTCAGTTGTGTTGAGCAGCAGAGTGTCTCCAAGTCCCCACTGGTTGAGCTGCATCCGGGT	intergenic							4.35965	5.54439
ASHGA5P029465	0.015114	0.0569074	2.2731	down	noncoding	ENST00000557368	CTD-2201G16.1	GENCODE	207	chr14	+	23884547	23884895	CTCCTCAGCATTCCTGCACTCCTGCACTGCCTCCTCCACTTCAGTCTGGAGCTGGGACAG	natural antisense	NM_000257	MYH7	myosin-7	-	23881946	23904870	7.65222	8.83688
ASHGA5P019212	0.00454064	0.0386604	2.27275	down	noncoding	ENST00000473358	MIR1302-10	GENCODE	712	chr1	+	29553	31097	TGTTCAATGGTTTTGTCCGCCTTCCCTGCCTCCTCTTCTGGGGGAGTTAGATCGAGTTGT	intergenic							7.8556	9.04004
ASHGA5P040913	0.00225201	0.0319402	2.2711	down	noncoding	ENST00000519603	RP11-443C10.1	GENCODE	624	chr5	-	178804531	178805762	GCCTCCTCCGCACGCTGCTCACCAGCCTGCTAAGTGGATGTGAATAAACAATCATGCAGG	intergenic							6.80079	7.98418
ASHGA5P040485	0.0081001	0.0437937	2.26877	down	noncoding	ENST00000513408	GUSBP3	GENCODE	1296	chr5	-	68935285	68975086	CATTTTTCATCTATATTATGAGGCAGTAAGAGTCTTCTGTTTTTCCAAAGTTGAGACTGC	intergenic							4.19498	5.3769
ASHGA5P040230	0.0346656	0.0931657	2.26699	down	noncoding	ENST00000510225	RP11-327O17.2	GENCODE	637	chr4	+	170122944	170141500	CTCCCTCTAACTCTAACTCATTTTAACCTCATTTAAACTTTGAGGAAAAAGAACTCAAGG	intronic antisense	NM_020870	SH3RF1	E3 ubiquitin-protein ligase SH3RF1	-	170015406	170192249	4.2114	5.39218
ASHGA5P039030	2.68677e-05	0.00861233	2.26187	down	noncoding	ENST00000566529	RP11-2A4.4	GENCODE	4706	chr3	+	137510814	137515520	GTCTCCTCTCAATACCTGGAAGAATGATGAGTGTTTGCTCTTCTACAAACCAACTCAAGG	intergenic							3.34473	4.52224
ASHGA5P038517	0.00103991	0.0258525	2.26011	down	noncoding	ENST00000498604	RP11-656A15.1	GENCODE	279	chr3	-	154229323	154257098	CAGCATTCCCAATGTGTATCCTGTGCCCCAATCCTGTGAGTAAATTTGTAGACCAAAAAA	intergenic							5.00019	6.17658
ASHGA5P051125	0.0140136	0.0547038	2.2601	down	noncoding	uc010gni.3	DSCR9	UCSC_knowngene	558	chr21	+	38580803	38592893	AATGCTACTAACAGTTCCCTCCTCACAGGGTCGCTATAACGAGGTAACATACAGCACTTA	natural antisense	ENST00000471543	DSCR3	Down syndrome critical region gene 3 [Source:HGNC Symbol;Acc:3044]	-	38591909	38600597	4.10825	5.28464
ASHGA5P047935	0.00195401	0.0309043	2.26003	down	noncoding	ENST00000527945	CTC-497E21.4	GENCODE	453	chr11	-	12984056	13011094	AGAATGTGGATTCCACCCCACGCCATGAGAGCTCTCGCGCAGGCCCAGACCACTTTATAA	intergenic							7.07943	8.25577
ASHGA5P026499	0.0306394	0.0859789	2.25817	down	noncoding	ENST00000433606	AP001092.4	GENCODE	469	chr11	+	64413870	64427153	TTGAGTCCTGGCTCCTCCCTCTGCCTTCACTAGTTTTGTAATGTTGAACAAGTCAATACA	intronic antisense	NM_015080	NRXN2	neurexin-2-beta isoform alpha-1 precursor	-	64373645	64490660	8.51506	9.69021
ASHGA5P026499	0.0306394	0.0859789	2.25817	down	noncoding	ENST00000433606	AP001092.4	GENCODE	469	chr11	+	64413870	64427153	TTGAGTCCTGGCTCCTCCCTCTGCCTTCACTAGTTTTGTAATGTTGAACAAGTCAATACA	intronic antisense	NM_138732	NRXN2	neurexin-2-beta isoform alpha-2 precursor	-	64373645	64490660	8.51506	9.69021
ASHGA5P057490	0.00975125	0.0464515	2.25714	down	noncoding	TCONS_00018319	XLOC_008597	LincRNAs identified by Cabili et al	360	chr10	+	105682667	105683570	ATCTGTACTTCTCTGTGTCAGGATGAATGTCAGGATGAATGTCACCACCACCTGCCTTTT	intergenic							3.60499	4.77949
ASHGA5P042747	0.0158744	0.0586284	2.2564	down	noncoding	ENST00000429305	RP11-302L19.1	GENCODE	429	chr6	+	170477740	170478251	CAGTCACTTCCGCTTGTACTAATTCTGGCCCAACCGTTCATTATATTTTTACAATTCTTA	intergenic							5.09727	6.27129
ASHGA5P047803	0.00590584	0.0404119	2.25616	down	noncoding	AW235165		LincRNAs identified by Khalil et al	431	chr20	+	1416447	1416866	GAAGGAAGGAAAGAAGAGGTGATCCAATCAGCATATTTTTTCTTTGAGAACATGAATAAC	intergenic							3.32446	4.49833
ASHGA5P033574	0.0102861	0.0473891	2.25426	down	noncoding	ENST00000434639	RP11-261C10.3	GENCODE	126	chr1	-	243220313	243220723	TCCCAGCCTTCTCTCCAGGCCCTGAACTTTCTCAAGTCGACCTCACCAGGCCCAGCTCAT	intergenic							6.00734	7.18
ASHGA5P027778	0.00254381	0.0337247	2.2526	down	noncoding	ENST00000441655	RPL13P5	pseudogene	615	chr12	+	6993162	6993777	ATCCACCCATAGTAAGGTGCCCCATGCTGAGGCATCACTACAAAGCACAAGCTGGCAGGG								3.90478	5.07637
ASHGA5P039622	0.0218779	0.070365	2.25216	down	noncoding	TCONS_00022975	XLOC_010811	LincRNAs identified by Cabili et al	446	chr14	+	39903870	39939938	CAGCAATATTTCCAGCCCTTGATGATCTTCTAGAACTTTGCCACTTCCCTGCATCAAGAG	intergenic							8.89134	10.0627
ASHGA5P041272	0.000473843	0.01908	2.25123	down	noncoding	ENST00000503812	RP11-93O17.1	pseudogene	166	chr5	+	98834763	98834929	TCTTTTAAGGCATTTCAATCCCTTCAGCCCTGTGAGTGGTATGCATTCACTTACTTAATA								3.79311	4.96382
ASHGA5P015117	0.00656972	0.0414551	2.24991	down	noncoding	ENST00000416854	U52111.14	GENCODE	244	chrX	-	153025944	153031933	GCGCCCACCACCCAGACAAGAGAGATCTAAGTCAGGCGTTGGGCAGGAGATGGAGCTGAG	intronic antisense	NM_001163257	PLXNB3	plexin-B3 isoform 2	+	153029650	153044801	4.93096	6.10082
ASHGA5P015117	0.00656972	0.0414551	2.24991	down	noncoding	ENST00000416854	U52111.14	GENCODE	244	chrX	-	153025944	153031933	GCGCCCACCACCCAGACAAGAGAGATCTAAGTCAGGCGTTGGGCAGGAGATGGAGCTGAG	intronic antisense	NM_005393	PLXNB3	plexin-B3 isoform 1 precursor	+	153029650	153044801	4.93096	6.10082
ASHGA5P058220	0.00176643	0.0295077	2.2488	down	noncoding	TCONS_00028268	XLOC_013612	LincRNAs identified by Cabili et al	1268	chr20	+	62033152	62034595	CCCTCCACCAGGTCCACAAGCCCTGTGAACCATCCCTCTCACACCACGTCTGCCGGGCAC	intergenic							6.47932	7.64848
ASHGA5P010387	0.00191405	0.0307364	2.24324	down	noncoding	ENST00000583763	CSAG4	pseudogene	237	chrX	-	151896279	151897097	AGACATAACCTCAGCCTGCTGGCCTGCCTTCACTGTCCTGGGGGAGGCATGGAGAGACCA								5.78789	6.95347
ASHGA5P023735	0.000309989	0.01588	2.24243	down	noncoding	HMlincRNA1623-	HMlincRNA1623	LincRNAs identified by Khalil et al	5420	chrX	-	136668177	136673597	TAAAACTACCCTTCTACTTTACAATCTATGTTCAATTTCTAGCCCACCACCTGGCAGTAT	intergenic							3.96343	5.1285
ASHGA5P031421	0.00012257	0.0127748	2.24193	down	noncoding	TCONS_00005948	XLOC_002578	LincRNAs identified by Cabili et al	275	chr3	+	12916996	12918609	TCTGTCCCTGCACACCAGAGATGATCAATGATCAGTTGCTGACATCAATGAAACAGGAAG	intergenic							4.48415	5.64889
ASHGA5P049087	0.0175523	0.0617511	2.24174	down	noncoding	TCONS_00023847	XLOC_011157	LincRNAs identified by Cabili et al	490	chr15	+	20505642	20531084	AAGAAGAAAAAAGAGGTATTTGGAAATTGTGCAAATTAAAGCAGCCCCTGATGCCAAAGT	intergenic							4.05366	5.21827
ASHGA5P058488	0.0026911	0.03424	2.23924	down	noncoding	uc004arq.1	LINC00475	UCSC_knowngene	1184	chr9	+	94919968	94921538	TTTGAAGAGCCCTAATCAGTGGTGGCTGTAGTCGGCTGGCTGAGGTCTCCCCACTGTGAA	intergenic							6.36526	7.52827
ASHGA5P038845	0.0273901	0.0802741	2.23907	down	noncoding	ENST00000464125	RP11-475O23.3	GENCODE	821	chr3	+	58592806	58620167	ACTAGAGAGAGAGAAGACAGAGAAATATAGGCAGTGAGTGAGGCTGTTCAGAACTCATGC	natural antisense	NM_138805	FAM3D	protein FAM3D precursor	-	58619669	58652561	3.20756	4.37046
ASHGA5P027036	0.0291534	0.0833801	2.23878	down	noncoding	CD172224		LincRNAs identified by Khalil et al	576	chr8	-	38512989	38513530	CCCCACTCCACGTGGAAGAGGATCACTTTTGAGAAAGCTCCAAATATGAAATACACCAAA	intergenic							4.57333	5.73604
ASHGA5P021356	0.0134421	0.0534958	2.23428	down	noncoding	ENST00000530792	CTD-2562J17.4	GENCODE	495	chr11	-	74919098	74952218	GAAATCCTCATGAAGATCCAGCACCTTCCAGTTAGCCCATCTATGAGAAAACCAATGCTC	natural antisense	NM_001195528	TPBGL	uncharacterized protein LOC100507050 precursor	+	74951949	74954749	4.70826	5.86806
ASHGA5P044110	0.0303359	0.0855174	2.2336	down	noncoding	uc022ars.1	AK091593	UCSC_knowngene	3015	chr8	-	9757573	9760588	TGCTGCTTCCACAGAGAAAACATTTTCTCTTTCCTCCTCTTGAACTTACATAATATCCTC	intergenic							3.91642	5.0758
ASHGA5P049562	0.0090344	0.0451458	2.22936	down	noncoding	ENST00000580574	CCDC144C	GENCODE	896	chr17	+	20243204	20246138	ATGGAGAGCATGACAGGTAAGCCTATAGCAGCGTTTAACAGGAGACAATTGGTCAAGTGT	intergenic							3.71942	4.87605
ASHGA5P032119	0.00503353	0.039342	2.2265	down	noncoding	ENST00000572792	RP11-420A6.2	GENCODE	512	chr17	-	5267609	5274921	GTATCCCACCACCTTCTGGATATGAAAGAAGGGAAAAAAGAATATGTATATATTTGCTTG	intronic antisense	NM_001083585	RABEP1	rab GTPase-binding effector protein 1 isoform 2	+	5185557	5289132	4.44182	5.5966
ASHGA5P032119	0.00503353	0.039342	2.2265	down	noncoding	ENST00000572792	RP11-420A6.2	GENCODE	512	chr17	-	5267609	5274921	GTATCCCACCACCTTCTGGATATGAAAGAAGGGAAAAAAGAATATGTATATATTTGCTTG	intronic antisense	NM_004703	RABEP1	rab GTPase-binding effector protein 1 isoform 1	+	5185557	5289132	4.44182	5.5966
ASHGA5P018291	0.00983878	0.0465913	2.22619	down	noncoding	ENST00000451648	RP11-93B14.5	GENCODE	649	chr20	-	61294370	61297979	GCACCACCAGCCTCTCACCAGAGCAGACTGTCGGCCTCACATCACCCCCACCTGCAGGAG	natural antisense	NM_016354	SLCO4A1	solute carrier organic anion transporter family member 4A1	+	61273796	61303647	9.00393	10.1585
ASHGA5P036737	0.0359	0.0953439	2.22585	down	noncoding	ENST00000443171	RP4-553F4.6	GENCODE	642	chr20	-	32375180	32398903	TAATACTCTTCCTCATTGGCCTTCCTGTCTCCATCTTTATTCCTTCCAGCTCATTCTCTA	intronic antisense	NM_032819	ZNF341	zinc finger protein 341	+	32319807	32380075	6.15408	7.30844
ASHGA5P023523	0.00348123	0.0361898	2.22558	down	noncoding	ENST00000582919	AC124789.1	GENCODE	419	chr17	-	36606869	36608190	TTCAGCTCCAAGTCTGGCCTCTCCTCCCAGCAAGCAGCCATTACAGAAACTGAGGCTTGG	intronic antisense	NM_001199417	ARHGAP23	rho GTPase-activating protein 23	+	36584719	36668628	6.62401	7.77819
ASHGA5P050265	0.00803798	0.0436793	2.22512	down	noncoding	TCONS_00000801	XLOC_000017	LincRNAs identified by Cabili et al	481	chr1	+	1317608	1318166	AATCCAGTAACAATCCAGAGGTCACCACCCTTCCCAACAATCCAGTAACAATCCAGAGGC	intergenic							5.91967	7.07355
ASHGA5P037281	0.000307632	0.0158473	2.22447	down	noncoding	TCONS_00025267	XLOC_012072	LincRNAs identified by Cabili et al	877	chr17	+	896642	897577	CGCATAATCCACCCTCACATAATCCACCCTCACATAATCCACACTCACATAATCCACCTC	intergenic							7.01573	8.16919
ASHGA5P030418	0.00473994	0.0390427	2.22274	down	noncoding	ENST00000561999	RP11-1000B6.3	GENCODE	366	chr15	+	32828914	32867844	TGAGGTCGTGACAAGTCACAGCTAACTTGCCCTCCGCGCCATTCCACGCCACCAGGAAGC	intergenic							6.88438	8.03672
ASHGA5P037107	0.0236897	0.0734924	2.22264	down	noncoding	ENST00000424566	RP5-955M13.4	GENCODE	802	chr20	+	49615906	49626556	ACCCCCACCTGTACTTCTTTGGAGACCGGCTGATTAGAGCTGTCTTGCCAGGACACACCA	natural antisense	NM_002237	KCNG1	potassium voltage-gated channel subfamily G member 1	-	49620192	49639675	7.2631	8.41538
ASHGA5P026781	0.0118709	0.0503889	2.22049	down	noncoding	ENST00000528496	RP11-65M17.3	GENCODE	855	chr11	+	112263840	112412639	CTTATTCACAGGGGGTGGTATTTATAAGGGAAAAGAATAACAGGGTGGTGTCAGTGATGG	intergenic							3.5321	4.68297
ASHGA5P034121	0.00163946	0.0292275	2.22019	down	noncoding	ENST00000453732	RP5-902P8.10	GENCODE	389	chr1	+	1210616	1214773	GTGGCCAGCACGTCTTGCCAAGACCCCACCACCCCACCCACCCGCATCTGTGGCCTTCTG	exon sense-overlapping	ENST00000379110	SCNN1D	sodium channel, non-voltage-gated 1, delta subunit [Source:HGNC Symbol;Acc:10601]	+	1214446	1227399	10.2112	11.3619
ASHGA5P036223	0.014441	0.0554475	2.21897	down	noncoding	ENST00000450108	RP11-242O24.5	GENCODE	320	chr1	+	29479000	29479503	TCAAGCCACTCTCCTCCCGTTACCTCTCTATATTAGCTTCTCTACTCTGGAAAACTTTCT	intronic antisense	NM_005626	SRSF4	serine/arginine-rich splicing factor 4	-	29474249	29508637	7.28324	8.43313
ASHGA5P029391	0.00394035	0.0377299	2.21874	down	noncoding	ENST00000452053	ADAM6	GENCODE	1842	chr14	-	106435818	106438358	TTCTGTCCCAGGTTCTTGTAGGTCGCTGATGCTCACTCTGAAATAAATCTTCAAAAACAC	intergenic							3.91019	5.05993
ASHGA5P040002	0.00893459	0.0449705	2.21822	down	noncoding	ENST00000511241	RP11-438E5.1	GENCODE	679	chr4	+	80179934	80229808	GCCCTGTCCCTGATATGAAAGATCTCTATCCACTTTTATTGAAATAAAGAACTAACATCA	intergenic							6.26524	7.41464
ASHGA5P056613	0.00033872	0.016478	2.21797	down	noncoding	TCONS_00006582	XLOC_003202	LincRNAs identified by Cabili et al	646	chr3	-	106529443	106531633	GGTCCCTCAGCCCATATTACTAAATGCCTGACTTCAGAAAAAAAACGTAAACAAAAGACA	intergenic							5.00227	6.1515
ASHGA5P018528	0.000294648	0.0157153	2.21748	down	noncoding	NR_034182	MATN1-AS1	RefSeq	2065	chr1	+	31191618	31199593	TCCACTCCCCGCTATGAAATGGCCACCTCACGGGGCATCATGGGAATCAAAGTGTCTGCA	natural antisense	NM_002379	MATN1	cartilage matrix protein precursor	-	31184123	31196432	6.30946	7.45838
ASHGA5P029820	0.00197686	0.0309043	2.21673	down	noncoding	ENST00000540171	RP11-982M15.6	GENCODE	1307	chr14	+	105147482	105151269	AACTCCACGTCTTATGAAATTAGCACTGGATTTCCACTTCAATTGGAAAATATGGCCAAG	intergenic							3.13992	4.28835
ASHGA5P032922	0.0230247	0.0722785	2.215	down	noncoding	ENST00000578183	SNORA59B	GENCODE	701	chr17	+	19460523	19461224	TTTAAGAATTATTCTCTTGCAGACCTATGTTTTTTGTTTTTGTTTTTCTATCCTTGGCAG	intron sense-overlapping	NM_018242	SLC47A1	multidrug and toxin extrusion protein 1	+	19437166	19482346	4.854	6.00131
ASHGA5P043738	0.00436681	0.0384788	2.21398	down	noncoding	uc010lco.3	BC110795	UCSC_knowngene	1969	chr7	+	74912421	74918383	CTGCTGCTCTCACGGAAACCCTGTCCTGCTTCTCACACTGACATCTGCTCTCTAATCACA	intergenic							5.96219	7.10883
ASHGA5P038059	0.00273905	0.034363	2.21329	down	noncoding	ENST00000449941	RP13-455A7.1	GENCODE	219	chr22	+	48256419	48257811	TATGCCAGCCCACACCACAGTCTTGGTCATCACTCCTGTTTCCATGGTGTTAACAGCAGC	intergenic							5.72509	6.87129
ASHGA5P028781	0.017959	0.062751	2.21224	down	noncoding	uc001uya.1	BC051736	UCSC_knowngene	529	chr13	+	41792721	41793250	CCCCAAAGTACCAGCATATAGTAAAACCTCAAACTCTGAAATTAAACAGAAAGCAAAAAC	intronic antisense	NM_004294	MTRF1	peptide chain release factor 1, mitochondrial	-	41790515	41837713	4.54671	5.69222
ASHGA5P051451	0.00407263	0.0377672	2.2105	down	noncoding	ENST00000450990	AC093415.2	GENCODE	562	chr3	-	37832241	37903239	CCTCTCGCCCCCTACTCATCACTCCCTGAAAGGTAAGTAGAGTTGGGTTGAAGATGAAAT	intronic antisense	NM_002207	ITGA9	integrin alpha-9 precursor	+	37493812	37861281	7.20348	8.34785
ASHGA5P036799	0.000866263	0.0244425	2.20979	down	noncoding	TCONS_00016402	XLOC_007773	LincRNAs identified by Cabili et al	1881	chr9	-	93736513	93747020	GTTGTTTCCTGGCTTCCTGATGGTCCTGTTTTTTACCTTCTGCTGCTTTTTACGGATTTA	intergenic							5.51289	6.6568
ASHGA5P038821	0.00408722	0.0377672	2.20952	down	noncoding	ENST00000464958	RP5-1157M23.2	GENCODE	1056	chr3	+	52273315	52275113	AAGGTCATGTGCCCTGTAAAAATGTCCCTCACTGGATGAACTGTGACAAAGTAGGGTACT	bidirectional	NM_007284	TWF2	twinfilin-2	-	52262625	52273183	4.61854	5.76227
ASHGA5P042435	0.00320218	0.0360585	2.20897	down	noncoding	ENST00000448211	RP11-328M4.3	GENCODE	660	chr6	+	41486110	41487590	CCCTGGCCCACTTTCCTGGTCATGTTCTCTTAGGAGTGGCTTCTAGCTATAAAAGCCCAG	intergenic							5.80492	6.94829
ASHGA5P037602	0.00366101	0.0368972	2.20705	down	noncoding	ENST00000418264	ZDHHC8P1	pseudogene	1403	chr22	-	23740124	23744344	ACTCACCATCCTACACAGGCCCCAAAGGTGTCACCTTCATCCAAATGGACCTCCTAGAGC								4.15156	5.29368
ASHGA5P031705	0.0014187	0.0280727	2.20604	down	noncoding	ENST00000568083	RP11-1166P10.9	GENCODE	9378	chr16	+	32141462	32150840	TTCTAATCAGAGAAGGGAATCCCCTCTGTACCTCCAGGATATTCAGTAAAGACCACTGGA	intergenic							5.73163	6.87309
ASHGA5P018555	0.0183497	0.0635861	2.20502	down	noncoding	ENST00000580440	AC005154.6	GENCODE	791	chr7	-	30617200	30634376	AGTAACATATATTGGCGAGCCAGCCAGGAGACCACTACAGGAAACACTCCATTTATTCCA	natural antisense	NM_002047	GARS	glycine--tRNA ligase precursor	+	30634180	30673648	3.03376	4.17455
ASHGA5P038556	0.0312314	0.0870834	2.20437	down	noncoding	TCONS_00023477	XLOC_011325	LincRNAs identified by Cabili et al	324	chr15	+	79512303	79513126	ATGCAGGAGGAGAGAGAGGAGGACAGGTTTTCTTCACATCCTGATTGCAGTTGATTCTTT	intergenic							3.1414	4.28177
ASHGA5P016257	0.0103088	0.0474081	2.2037	down	noncoding	ENST00000428649	FAM75C2	pseudogene	3761	chr9	-	90744219	90749900	TGTGACAACCCACCCTCACCATCGCCTAAGAAGAGAAAGCGTCATCTTGTCTCCCAGCGT								6.93039	8.07032
ASHGA5P021289	0.00832634	0.0440999	2.20251	down	noncoding	ENST00000529624	HERC2P9	pseudogene	5187	chr15	+	28835334	28919173	AAGCAACCAGCTTTTGTGTGGTCCTCTGAGCCCCAGTGAGAGTTTCCTGAGGTACCTCAC								10.2921	11.4312
ASHGA5P029776	0.0213325	0.0695004	2.20215	down	noncoding	ENST00000553584	MEG8	GENCODE	498	chr14	+	101361106	101373305	TAGATTCTTTAGAATAGAACTAACTCAAGCCCTTCATTCTGCAGCTGAGGCTCACTGCCC	intergenic							4.79881	5.93772
ASHGA5P051068	0.0227045	0.0718183	2.19768	down	noncoding	ENST00000358393	LINC00176	GENCODE	1466	chr20	+	62669492	62671131	CCCTCCCCAGGAGCACAGTATCCTCCTGTCCATCTCGTCCCTGGGTCGGACCCTGCGCGG	intronic antisense	ENST00000217130	ZNF512B	zinc finger protein 512B [Source:HGNC Symbol;Acc:29212]	-	62588054	62669938	7.59148	8.72746
ASHGA5P051068	0.0227045	0.0718183	2.19768	down	noncoding	ENST00000358393	LINC00176	GENCODE	1466	chr20	+	62669492	62671131	CCCTCCCCAGGAGCACAGTATCCTCCTGTCCATCTCGTCCCTGGGTCGGACCCTGCGCGG	intronic antisense	ENST00000450537	ZNF512B	zinc finger protein 512B [Source:HGNC Symbol;Acc:29212]	-	62588054	62680113	7.59148	8.72746
ASHGA5P057935	0.0439962	0.108502	2.19765	down	noncoding	TCONS_00023984	XLOC_011316	LincRNAs identified by Cabili et al	216	chr15	+	77991685	77992117	GCACACAATAAGCACATACTAACCATCATCCCCACACACAGTAAGTGCATACTAACCATC	intronic antisense	ENST00000561686	LINGO1	leucine rich repeat and Ig domain containing 1 [Source:HGNC Symbol;Acc:21205]	-	77907694	78079356	5.42478	6.56074
ASHGA5P057935	0.0439962	0.108502	2.19765	down	noncoding	TCONS_00023984	XLOC_011316	LincRNAs identified by Cabili et al	216	chr15	+	77991685	77992117	GCACACAATAAGCACATACTAACCATCATCCCCACACACAGTAAGTGCATACTAACCATC	intronic antisense	ENST00000562933	LINGO1	leucine rich repeat and Ig domain containing 1 [Source:HGNC Symbol;Acc:21205]	-	77908195	78112674	5.42478	6.56074
ASHGA5P057935	0.0439962	0.108502	2.19765	down	noncoding	TCONS_00023984	XLOC_011316	LincRNAs identified by Cabili et al	216	chr15	+	77991685	77992117	GCACACAATAAGCACATACTAACCATCATCCCCACACACAGTAAGTGCATACTAACCATC	intronic antisense	ENST00000563316	LINGO1	leucine rich repeat and Ig domain containing 1 [Source:HGNC Symbol;Acc:21205]	-	77908218	78113213	5.42478	6.56074
ASHGA5P057935	0.0439962	0.108502	2.19765	down	noncoding	TCONS_00023984	XLOC_011316	LincRNAs identified by Cabili et al	216	chr15	+	77991685	77992117	GCACACAATAAGCACATACTAACCATCATCCCCACACACAGTAAGTGCATACTAACCATC	intronic antisense	ENST00000564472	LINGO1	leucine rich repeat and Ig domain containing 1 [Source:HGNC Symbol;Acc:21205]	-	77908123	78013093	5.42478	6.56074
ASHGA5P057935	0.0439962	0.108502	2.19765	down	noncoding	TCONS_00023984	XLOC_011316	LincRNAs identified by Cabili et al	216	chr15	+	77991685	77992117	GCACACAATAAGCACATACTAACCATCATCCCCACACACAGTAAGTGCATACTAACCATC	intronic antisense	ENST00000566711	LINGO1	leucine rich repeat and Ig domain containing 1 [Source:HGNC Symbol;Acc:21205]	-	77908014	78111794	5.42478	6.56074
ASHGA5P057935	0.0439962	0.108502	2.19765	down	noncoding	TCONS_00023984	XLOC_011316	LincRNAs identified by Cabili et al	216	chr15	+	77991685	77992117	GCACACAATAAGCACATACTAACCATCATCCCCACACACAGTAAGTGCATACTAACCATC	intronic antisense	ENST00000567726	LINGO1	leucine rich repeat and Ig domain containing 1 [Source:HGNC Symbol;Acc:21205]	-	77907854	77999849	5.42478	6.56074
ASHGA5P057935	0.0439962	0.108502	2.19765	down	noncoding	TCONS_00023984	XLOC_011316	LincRNAs identified by Cabili et al	216	chr15	+	77991685	77992117	GCACACAATAAGCACATACTAACCATCATCCCCACACACAGTAAGTGCATACTAACCATC	intronic antisense	ENST00000570216	LINGO1	leucine rich repeat and Ig domain containing 1 [Source:HGNC Symbol;Acc:21205]	-	77908174	78113242	5.42478	6.56074
ASHGA5P048342	0.0133132	0.0532681	2.19698	down	noncoding	ENST00000525328	RP11-672A2.1	GENCODE	832	chr11	-	76423439	76430652	ATCGCTTCTCCTCTCTGAACAAGCTGTAGGCTCTTTACCTGTGAATTGGGGAGAATACAT	intergenic							4.64411	5.77963
ASHGA5P045665	0.000930862	0.0253095	2.1969	down	noncoding	TCONS_00002599	XLOC_001219	LincRNAs identified by Cabili et al	270	chr1	-	223266750	223267686	TCAGCATTCTGTTCCATCCCTGTCACTTCGATGTCTCTCTTTCTTGAATATGGAAGCAGC	intergenic							8.5816	9.71706
ASHGA5P036099	0.0227815	0.0718674	2.19621	down	noncoding	uc021vmx.1	DKFZp434K1323	UCSC_knowngene	507	chr2	+	114341204	114341711	GAGCGGCGGCGTTAGGACCCGGAGGCGCGGGCGGAGGTGGCGGGGCTAGGACCCAGCGGC	intergenic							4.2361	5.37112
ASHGA5P036129	0.0447722	0.109828	2.1946	down	noncoding	ENST00000419223	AC023347.1	GENCODE	440	chr2	+	127069990	127086709	GAATCCATGGCTTTCAGTGTCTGGCCCTATTTCTTCTAGTTCAAGAATTTTAAGAAAAAA	intergenic							3.19878	4.33274
ASHGA5P030764	0.00572236	0.0402776	2.19432	down	noncoding	TCONS_00009003	XLOC_003849	LincRNAs identified by Cabili et al	353	chr4	-	1282935	1283492	CCTTTCAAACACCACCCGTCTCCCTCCTTTCCAAAATAAAACTGAAATTAGATTTTATTA	intergenic							8.74719	9.88097
ASHGA5P056379	0.0255615	0.0766774	2.19333	down	noncoding	TCONS_00003820	XLOC_001628	LincRNAs identified by Cabili et al	318	chr2	+	113436286	113438656	TCCTCCAAATCTCCTCCTGAAAAGCATGCAGCCGGCAGAAGATCTGGATACCACAGAGAC	intergenic							4.17811	5.31123
ASHGA5P055164	0.00136084	0.0277004	2.19302	down	noncoding	ENST00000525260	RP11-728F11.4	GENCODE	891	chr11	+	117704607	117708370	TCCCTACAGCTTGTACTCTGCCTCTGACTCTCTTCCAAGAACAATTTGGCAAGTTCTAAT	intronic antisense	NM_001204268	FXYD6-FXYD2	FXYD6-FXYD2 read-through protein isoform 1 precursor	-	117690789	117747746	4.83233	5.96525
ASHGA5P055164	0.00136084	0.0277004	2.19302	down	noncoding	ENST00000525260	RP11-728F11.4	GENCODE	891	chr11	+	117704607	117708370	TCCCTACAGCTTGTACTCTGCCTCTGACTCTCTTCCAAGAACAATTTGGCAAGTTCTAAT	intronic antisense	NM_001243598	FXYD6-FXYD2	FXYD6-FXYD2 read-through protein isoform 2 precursor	-	117690789	117747746	4.83233	5.96525
ASHGA5P055164	0.00136084	0.0277004	2.19302	down	noncoding	ENST00000525260	RP11-728F11.4	GENCODE	891	chr11	+	117704607	117708370	TCCCTACAGCTTGTACTCTGCCTCTGACTCTCTTCCAAGAACAATTTGGCAAGTTCTAAT	natural antisense	NM_001164831	FXYD6	FXYD domain-containing ion transport regulator 6 precursor	-	117707690	117748201	4.83233	5.96525
ASHGA5P055164	0.00136084	0.0277004	2.19302	down	noncoding	ENST00000525260	RP11-728F11.4	GENCODE	891	chr11	+	117704607	117708370	TCCCTACAGCTTGTACTCTGCCTCTGACTCTCTTCCAAGAACAATTTGGCAAGTTCTAAT	natural antisense	NM_001164832	FXYD6	FXYD domain-containing ion transport regulator 6 precursor	-	117707690	117747746	4.83233	5.96525
ASHGA5P055164	0.00136084	0.0277004	2.19302	down	noncoding	ENST00000525260	RP11-728F11.4	GENCODE	891	chr11	+	117704607	117708370	TCCCTACAGCTTGTACTCTGCCTCTGACTCTCTTCCAAGAACAATTTGGCAAGTTCTAAT	natural antisense	NM_001164836	FXYD6	FXYD domain-containing ion transport regulator 6 precursor	-	117707690	117747746	4.83233	5.96525
ASHGA5P055164	0.00136084	0.0277004	2.19302	down	noncoding	ENST00000525260	RP11-728F11.4	GENCODE	891	chr11	+	117704607	117708370	TCCCTACAGCTTGTACTCTGCCTCTGACTCTCTTCCAAGAACAATTTGGCAAGTTCTAAT	natural antisense	NM_001164837	FXYD6	FXYD domain-containing ion transport regulator 6 precursor	-	117707690	117747746	4.83233	5.96525
ASHGA5P055164	0.00136084	0.0277004	2.19302	down	noncoding	ENST00000525260	RP11-728F11.4	GENCODE	891	chr11	+	117704607	117708370	TCCCTACAGCTTGTACTCTGCCTCTGACTCTCTTCCAAGAACAATTTGGCAAGTTCTAAT	natural antisense	NM_022003	FXYD6	FXYD domain-containing ion transport regulator 6 precursor	-	117707690	117747746	4.83233	5.96525
ASHGA5P040884	0.00135054	0.0276104	2.19104	down	noncoding	ENST00000518902	CTB-43E15.3	GENCODE	490	chr5	-	173146248	173173214	GCCACCTCTATATACATGTACACAAAGCCACACAGTTTACACAGTCACAGGTATTTAAGT	intergenic							3.3687	4.50031
ASHGA5P038066	0.00810724	0.0437937	2.19	down	noncoding	TCONS_00024360	XLOC_011682	LincRNAs identified by Cabili et al	349	chr16	+	27389362	27389821	TAGGGGCCATAAAAAATGGTTGTTTTGAGCTGGGTACAGTGGCTCACTCCTGTAATTCCA	intergenic							4.2268	5.35773
ASHGA5P058585	0.0188003	0.0643586	2.18888	down	noncoding	uc010msw.1	DQ673950	UCSC_knowngene	757	chr9	-	102133135	102136303	TGGCAGGCAGCCTCCTTCCTTGGTTCACAATGACAGTCCAACTTCTGCCAGTCCTGACTG	intergenic							4.78664	5.91683
ASHGA5P046979	0.000353399	0.0166633	2.18822	down	noncoding	ENST00000451940	RP11-322M19.1	GENCODE	684	chr10	-	88963609	89102299	GGATCCTCCTGGCTTTTTGAGAATCGGCTGGCATCAGGGTGCTGACTGACAAACTTCCCG	intronic antisense	NM_001099338	FAM22A	protein FAM22A	+	88985204	88994733	4.08542	5.21518
ASHGA5P049205	0.00302802	0.0355889	2.18778	down	noncoding	ENST00000571606	ANKRD26P1	GENCODE	548	chr16	-	46508033	46512351	CTGTTGTGAGGTAAGGGCTATGCTCCCTGCTGTCTCCTCTCACATGTCTGCTCCTATCCA	intergenic							5.37047	6.49994
ASHGA5P040072	0.000417683	0.0180833	2.18771	down	noncoding	ENST00000503557	RP11-26P13.2	GENCODE	441	chr4	+	114864411	114865476	TCCTGGGATTGACCTCTCCTTTCTTTTAAAAAATATTCAGTGAACACTACTTTGTGCCAG	intronic antisense	NM_024590	ARSJ	arylsulfatase J precursor	-	114821439	114900878	2.76991	3.89933
ASHGA5P037221	1.06104e-05	0.00758285	2.18639	down	noncoding	ENST00000419069	LINC00317	GENCODE	612	chr21	-	23095612	23109639	TGAGGCTTCCCTGTTCCTTGTGATAACTTACATACTTGGAATTATAGAGACTTAATTTTG	intergenic							4.62986	5.75841
ASHGA5P033166	0.0242934	0.0744501	2.18538	down	noncoding	ENST00000572193	RP5-867C24.5	GENCODE	673	chr17	+	45247191	45248415	CTTCATTACCAAAGTGCATCTAACTATGGAGACACAAATTTTTTCTCTCTCTCTCTTTCC	natural antisense	NM_001114091	CDC27	cell division cycle protein 27 homolog isoform 1	-	45195310	45266665	3.86271	4.99059
ASHGA5P033166	0.0242934	0.0744501	2.18538	down	noncoding	ENST00000572193	RP5-867C24.5	GENCODE	673	chr17	+	45247191	45248415	CTTCATTACCAAAGTGCATCTAACTATGGAGACACAAATTTTTTCTCTCTCTCTCTTTCC	natural antisense	NM_001256	CDC27	cell division cycle protein 27 homolog isoform 2	-	45195310	45266665	3.86271	4.99059
ASHGA5P028542	0.0102368	0.0473781	2.18483	down	noncoding	NR_046414	LINC00441	RefSeq	1191	chr13	-	48870648	48877797	AGTTTCCTCTTTTTTGTTTTCTTAATGGCTTGATGAGCCACACATGTTTCTCTAAATGCA	bidirectional	NM_000321	RB1	retinoblastoma-associated protein	+	48877882	49056026	4.16659	5.29412
ASHGA5P031008	0.00281917	0.0345227	2.18412	down	noncoding	ENST00000448643	RP11-479J7.1	GENCODE	810	chr1	-	166356963	166421869	ATGCCACCCAAAACTTGTCTGATTGAGAACATGACAAAAGAACACTGAAGAGATAAATAA	intergenic							3.70453	4.83158
ASHGA5P018847	0.00514191	0.0396122	2.18335	down	noncoding	ENST00000458253	AC018730.1	GENCODE	747	chr2	-	105424034	105467916	AAACCTAACCCTGGAAGTTTGCTCGCTAAATTGCAGAGGGTCCCAGTTTCATTCATTCTC	intergenic							4.59677	5.72331
ASHGA5P036344	4.30536e-05	0.00923249	2.18328	down	noncoding	ENST00000472376	AOX2P	GENCODE	1291	chr2	+	201605543	201619790	GTCCAGCCTCTAAAGTCTTGGTGCTTTGCCAAATTTCTCTTACATCTCTTCCTTTCAAAT	intergenic							3.3588	4.4853
ASHGA5P046786	0.000742822	0.02304	2.18281	down	noncoding	ENST00000427373	LINC00266-4P	GENCODE	842	chrY	-	27524446	27540866	AAGTGTGTGTCAGAAAAAATTAGCGATTTTGGAGGATTAGGGGACTTTGATAAATTGCCT	intergenic							4.95646	6.08265
ASHGA5P000243	0.00459474	0.0388495	2.18242	down	noncoding	chr13:104871700-104904225-	chr13:104871700-104904225	LincRNAs identified by Khalil et al	32525	chr13	-	106073699	106106224	GATATGCGCAGGTTGCCCCCTTTAGGAAGAGCACAGTGACTCTTTCTAATTCTATTTTTC	intergenic							5.06319	6.18912
ASHGA5P031566	0.00746044	0.0428256	2.18197	down	noncoding	ENST00000547549	MIR3179-2	GENCODE	677	chr16	+	16394006	16394683	AGATGCCACCCATCTACATATTCTTTCAGATGCACAATATTTCACTGTGTGAATGAAACA	intergenic							4.10765	5.23328
ASHGA5P014928	0.00563925	0.0402473	2.18191	down	noncoding	ENST00000414875	RP1-153P14.5	GENCODE	998	chr6	+	37512920	37518636	CTGCGGGGTTTGGGAAGATAGAGGCTGGCAGAGGACTGGGGTAGAAAAGGAAGGAAGAAT	intergenic							4.30321	5.4288
ASHGA5P040286	0.00713497	0.0424735	2.18187	down	noncoding	NR_038377	MGC39584	RefSeq	1207	chr4_gl000193_random	-	49162	88375	GAATTTGGTGGCTCTTTTTCTGGTTAATATAAAACGTGACTGTCAGAATCCCATCTCTAA	intergenic							5.22554	6.3511
ASHGA5P033369	0.0297274	0.0843385	2.18186	down	noncoding	TCONS_00028465	XLOC_013838	LincRNAs identified by Cabili et al	586	chr20	-	61416929	61423462	GGAGCTGCTTTCTCTCTGCTCCACTTCTACAGAGAAAGAAAATCACAAGCATTTCCCACA	intergenic							3.48838	4.61393
ASHGA5P040729	0.000955149	0.0254289	2.18081	down	noncoding	ENST00000456469	RP11-763B22.6	GENCODE	408	chr1	+	148852392	148853717	CCCTGGAGCCTCCATCCCAGTTCCCACCACGCACCCGCTCCACAAATCCTGCCCAAGGTG	intergenic							11.0944	12.2193
ASHGA5P035265	0.00428598	0.0383369	2.17957	down	noncoding	ENST00000556770	RP11-77A13.1	GENCODE	1011	chr2	-	119706881	119710559	AACCCAGTGCTTAAATCCATTACTATTCCTACCACCAGCAACTCTAACCCCACTGTAGGG	intronic antisense	NM_006770	MARCO	macrophage receptor MARCO	+	119699744	119752236	11.5837	12.7077
ASHGA5P046044	0.000532503	0.0200281	2.1788	down	noncoding	NR_015413	LOC254312	RefSeq	1127	chr10	-	10976902	10994126	CCCACCCTCTCGCAGCTACGTGCCAGTTCCAGAGCACCTGTTCCCCTCTACTTTGAAAAG	intergenic							7.88197	9.0055
ASHGA5P041084	0.0224732	0.0714816	2.17685	down	noncoding	ENST00000508923	CTD-2089N3.3	GENCODE	432	chr5	+	50265493	50266021	GTTCCCCCTCTCCACGCGTACGCACACTCATTTTTAGTTTTAACAAATGATTTAAAAATC	intergenic							8.52018	9.64243
ASHGA5P058599	0.0062764	0.0410595	2.17684	down	noncoding	uc010qvj.2	AL137655	UCSC_knowngene	2174	chr11	-	120810	139612	CGAAACGTGACTGCAGGACAAGTTCGAGCATCTTAAAATGATTCAACAGGAGGAGATAAG	intergenic							3.03229	4.15453
ASHGA5P057544	0.00099585	0.0258525	2.17581	down	noncoding	TCONS_00018650	XLOC_009001	LincRNAs identified by Cabili et al	300	chr10	-	133731724	133732096	TGTGAGATCCCTACACTGTGTCATTCCACCCACGTGAGATCCCTACACCGTGTCATTCCA	intergenic							4.94823	6.06979
ASHGA5P039881	0.00157837	0.0287561	2.172	down	noncoding	ENST00000501725	RP11-103J17.1	GENCODE	430	chr4	+	37080203	37112665	TGACCTGCTGCCTGCTATCTTAACACGAATTCTTCATCTGAATGGATGAGCTTTTCACAG	intergenic							4.73661	5.85563
ASHGA5P044647	0.00430132	0.0383582	2.17137	down	noncoding	ENST00000523246	RP11-115J16.1	GENCODE	674	chr8	+	9107049	9183486	TTCATCCTTCCCCTGGTACAGAAGAGCTGCGTCAGTCATTCTCTCTGTGATCTACTGATA	intergenic							5.67817	6.79678
ASHGA5P039728	0.00370153	0.0369302	2.17118	down	noncoding	NR_040108	LOC728175	RefSeq	1878	chr4	-	185262183	185275130	CCCTCAGCCTCCAGTAGCATCCCTACGTTTTACAATTTTATTTATGTCACTTTAAATAAG	intergenic							5.61051	6.72899
ASHGA5P032376	0.00169102	0.0293883	2.16951	down	noncoding	ENST00000581083	RP1-56K13.2	GENCODE	437	chr17	-	37059956	37060853	TTATGACCCTTCTCCGGCAACAGTGTAGAAAGCAGACAAGTGTGCCTTTAAAGTATTGAT	intronic antisense	NM_006148	LASP1	LIM and SH3 domain protein 1	+	37026111	37078023	3.64168	4.75905
ASHGA5P043108	0.00860981	0.0443672	2.16788	down	noncoding	uc003tvs.4	PMS2P4	UCSC_knowngene	744	chr7	-	66757422	66767406	GAAAAACATAGTCAATGCTCAACATCACGGGTCTCTCACTGAACACACCACACCTGGTAT	intergenic							4.7319	5.84818
ASHGA5P041060	0.0191084	0.065066	2.16748	down	noncoding	ENST00000510509	OXCT1-AS1	GENCODE	499	chr5	+	41870221	41870818	TGTTGGCGCACACTTGCCGCTACAGCCCTTCTGTCAGCCCTTTAGCTTCGATGGGGCGCT	natural antisense	NM_000436	OXCT1	succinyl-CoA:3-ketoacid coenzyme A transferase 1, mitochondrial precursor	-	41730166	41870791	7.41701	8.53303
ASHGA5P037662	0.0332979	0.0905723	2.16632	down	noncoding	ENST00000441289	RP11-247I13.7	GENCODE	597	chr22	-	31832962	31835893	GTATCCTCTTCCACTTATCTTACTTCCCCTTCATGTTGAACCAACGTTAATAGGTGCAAG	exon sense-overlapping	NM_001164501	EIF4ENIF1	eukaryotic translation initiation factor 4E transporter isoform a	-	31835344	31885547	5.16079	6.27604
ASHGA5P037662	0.0332979	0.0905723	2.16632	down	noncoding	ENST00000441289	RP11-247I13.7	GENCODE	597	chr22	-	31832962	31835893	GTATCCTCTTCCACTTATCTTACTTCCCCTTCATGTTGAACCAACGTTAATAGGTGCAAG	exon sense-overlapping	NM_001164502	EIF4ENIF1	eukaryotic translation initiation factor 4E transporter isoform b	-	31835344	31885874	5.16079	6.27604
ASHGA5P037662	0.0332979	0.0905723	2.16632	down	noncoding	ENST00000441289	RP11-247I13.7	GENCODE	597	chr22	-	31832962	31835893	GTATCCTCTTCCACTTATCTTACTTCCCCTTCATGTTGAACCAACGTTAATAGGTGCAAG	exon sense-overlapping	NM_019843	EIF4ENIF1	eukaryotic translation initiation factor 4E transporter isoform a	-	31835344	31885874	5.16079	6.27604
ASHGA5P030343	0.00798591	0.0435617	2.16567	down	noncoding	ENST00000567916	RP11-810K23.3	GENCODE	405	chr15	+	21195987	21198600	GACTTGACTGAAGCCCTTTTGAATATTTTTTCTGCTTCTGTTCTGTTCTTGCAATAACAA	intergenic							3.34112	4.45594
ASHGA5P038054	0.0122292	0.0510946	2.16464	down	noncoding	uc003bij.3	BC039485	UCSC_knowngene	1170	chr22	+	48027451	48038545	TCCTGCTGCCTCGCCCGCTTTCTCTCGGAAACGTGAAGTGTGGCCTCAGCTGAAAGTGAG	intergenic							5.99932	7.11345
ASHGA5P031574	0.0116754	0.0498651	2.16431	down	noncoding	ENST00000565802	RP11-626G11.1	GENCODE	704	chr16	+	19077312	19078016	TGAAAGCTCCCTTCTCCCAGTTCCAGCCCCCTGATGTTGCCAATATTAAACGTTGTATAT	intergenic							9.43872	10.5526
ASHGA5P051233	0.0213122	0.0694944	2.16415	down	noncoding	ENST00000479693	PI4KAP2	GENCODE	1906	chr22	-	21831701	21871809	ATGGCGCTGGGCGGGCGGCTGTGAGCGGCGCTCGGGGCGCGCTAGGCGGGGAGCCGAGCC	intergenic							3.94532	5.05912
ASHGA5P028741	0.00197221	0.0309043	2.16369	down	noncoding	uc001els.1	AX747132	UCSC_knowngene	839	chr1	-	144832199	144833038	GAAAAATGTGTCTTCCTTAATTTTTCCCATAAGAACCACCCTACTTCATGCCCTGTCTCT	intergenic							5.51199	6.62548
ASHGA5P000328	0.000302308	0.015749	2.16304	down	noncoding	chr2:122289675-122301200+	chr2:122289675-122301200	LincRNAs identified by Khalil et al	11525	chr2	+	122573205	122584730	CAGTGTCCCCTCTGCCTAAATTTCTATCCTAGTGTTATAGCAAGAATAATGCCTGGAGTG	intergenic							6.18409	7.29715
ASHGA5P034495	0.000261319	0.0156145	2.16136	down	noncoding	uc001amm.3	C1orf211	UCSC_knowngene	1260	chr1	+	6297870	6299502	CACTGTGCACCCAGCCCTCCATGCTTGGGGACAACACACCTACAAAAATATAAGAAAAAA	intergenic							8.10799	9.21993
ASHGA5P033247	0.00046345	0.0187433	2.16075	down	noncoding	TCONS_00028587	XLOC_013608	LincRNAs identified by Cabili et al	631	chr20	+	61747568	61748555	CATCTCTCATGTCATTAAGAACAATGAAACTATAGCACACACACATTCCAGTGGAAAAAA	intergenic							3.77633	4.88787
ASHGA5P057783	0.000688014	0.0225597	2.16023	down	noncoding	TCONS_00021991	XLOC_010591	LincRNAs identified by Cabili et al	567	chr13	-	45902702	45903917	AGTTCCCCAGCTCGGCTAAAACAAATAAAAGATAAGCGTCTGCATCAATTTGGCAGACTT	intergenic							4.53588	5.64707
ASHGA5P047144	0.00694813	0.0420215	2.16014	down	noncoding	ENST00000449984	RP11-298J20.3	GENCODE	830	chr10	-	126633772	126635001	ATAAACCTACATGTACTATAACACCACCTTGTAGTCCAAGTATTCATAGTACACTACTCC	intronic antisense	NM_017580	ZRANB1	ubiquitin thioesterase ZRANB1	+	126630691	126676005	3.20472	4.31585
ASHGA5P056672	0.0123925	0.051445	2.16006	down	noncoding	TCONS_00007074	XLOC_002996	LincRNAs identified by Cabili et al	1586	chr3	+	195374325	195376288	TCCAGTTTGAGGGCAGTGCAGCTGGAGACCCGGCGGGGAGCTGATGTTCCAGTTTGAGGT	intron sense-overlapping	ENST00000381954	MUC20	mucin 20, cell surface associated [Source:HGNC Symbol;Acc:23282]	+	195343315	195460421	3.35845	4.46952
ASHGA5P019366	0.0068744	0.0420015	2.15961	down	noncoding	ENST00000480074	RP4-545C24.1	GENCODE	556	chr7	+	143892980	143929388	CTGTCTGCCTGCTGCAGTCTGTCATTCAACATTTATTCAACCAAAAATACTAAGTCAGCT	natural antisense	NM_001001802	OR2A42	olfactory receptor 2A1/2A42	-	143929003	143929936	4.65519	5.76596
ASHGA5P019366	0.0068744	0.0420015	2.15961	down	noncoding	ENST00000480074	RP4-545C24.1	GENCODE	556	chr7	+	143892980	143929388	CTGTCTGCCTGCTGCAGTCTGTCATTCAACATTTATTCAACCAAAAATACTAAGTCAGCT	natural antisense	NM_001005287	OR2A1	olfactory receptor 2A1/2A42	-	143929003	143929936	4.65519	5.76596
ASHGA5P031728	0.0238688	0.0738075	2.15921	down	noncoding	NR_033985	FLJ26245	RefSeq	1598	chr16	+	34980922	34990995	GGCTTCCCGCTCCCTTCCCACTTTTCCCTGCTTGTTACAACATTTCCCGATTCTGTGACC	intergenic							10.228	11.3385
ASHGA5P018584	0.000591903	0.0207526	2.15682	down	noncoding	ENST00000455288	LINC00281	GENCODE	1737	chr22	-	21655285	21677166	TCCCTCCACACTAGGTGACTCGAAGAAGCCTTCCAAAAAGCATGTGAAAAGGAAGCCCTA	intergenic							3.3507	4.45961
ASHGA5P044145	0.00479501	0.0390427	2.15592	down	noncoding	ENST00000521016	RP11-618M23.4	GENCODE	362	chr8	-	19111750	19114844	GCCCTCCGCCTTAGACTTTGCATTATCTACCACTGCATAATAAAGTACTCCAAAATATAA	intergenic							6.49647	7.60478
ASHGA5P037124	0.000183584	0.0138757	2.15556	down	noncoding	ENST00000445956	RP4-813D12.2	GENCODE	436	chr20	+	55789927	55790922	AGGTAAATTCAGCCCCTTTCCTGAAGCACACTCAAGGAATAAACAAGCACCACAAATACA	intronic antisense	NM_001719	BMP7	bone morphogenetic protein 7 precursor	-	55743808	55841707	4.5946	5.70266
ASHGA5P043396	0.0143963	0.0553443	2.15538	down	noncoding	uc011ktp.2	FAM115C	UCSC_knowngene	2779	chr7	-	143336431	143518083	ATATAGAGAGGAAAATGGCAACTCATCCTCCTCACCACACCACCAGCTCCAGTCTCATGC	intron sense-overlapping	NM_178561	CTAGE6P	putative protein cTAGE-6	-	143452181	143454843	6.09622	7.20416
ASHGA5P043396	0.0143963	0.0553443	2.15538	down	noncoding	uc011ktp.2	FAM115C	UCSC_knowngene	2779	chr7	-	143336431	143518083	ATATAGAGAGGAAAATGGCAACTCATCCTCCTCACCACACCACCAGCTCCAGTCTCATGC	intronic antisense	NM_001130025	FAM115C	protein FAM115C isoform A	+	143318044	143422176	6.09622	7.20416
ASHGA5P043396	0.0143963	0.0553443	2.15538	down	noncoding	uc011ktp.2	FAM115C	UCSC_knowngene	2779	chr7	-	143336431	143518083	ATATAGAGAGGAAAATGGCAACTCATCCTCCTCACCACACCACCAGCTCCAGTCTCATGC	intronic antisense	NM_001130026	FAM115C	protein FAM115C isoform B	+	143412938	143427173	6.09622	7.20416
ASHGA5P043396	0.0143963	0.0553443	2.15538	down	noncoding	uc011ktp.2	FAM115C	UCSC_knowngene	2779	chr7	-	143336431	143518083	ATATAGAGAGGAAAATGGCAACTCATCCTCCTCACCACACCACCAGCTCCAGTCTCATGC	intronic antisense	NM_173678	FAM115C	protein FAM115C isoform A	+	143318541	143422176	6.09622	7.20416
ASHGA5P042235	0.000903588	0.0250964	2.15538	down	noncoding	uc003mxa.3	BC039678	UCSC_knowngene	1328	chr6	+	6725118	6730141	TGTTATCAGGAAAGACCAACCCTAACCCCAGTTCCATGGAGTAAAGATTAATTAATCTAA	intergenic							7.50833	8.61627
ASHGA5P057278	0.00944279	0.0460251	2.15512	down	noncoding	TCONS_00015203	XLOC_006681	LincRNAs identified by Cabili et al	351	chr8	+	928225	928734	TTTGGTGTTGTGGGGAGGGGCGTCGGGGATGCAGTGAGGTGCTGGGTTCTGGTCTTTGGT	intergenic							5.2218	6.32956
ASHGA5P018706	0.0134618	0.0535279	2.15374	down	noncoding	ENST00000456633	RP11-29H23.1	GENCODE	911	chr1	+	155531832	155533437	CGGCCAGCGGGGGCAGGAGAGGAAGGGACGGGCCGAGCGGGTCGGGGCTTGCCGTTTGAC	natural antisense	NM_018489	ASH1L	histone-lysine N-methyltransferase ASH1L	-	155305051	155532324	4.81261	5.91945
ASHGA5P027035	0.0232624	0.0727952	2.15245	down	noncoding	ENST00000449215	RP11-344F13.1	GENCODE	282	chr1	-	14548385	14549613	TTATTCATGACCTTCATCTACCTTCCCTTTCATCAAGTAAATGGAAATGTGTCATTCTGA	intergenic							3.97421	5.08019
ASHGA5P032184	0.00418512	0.0381334	2.15147	down	noncoding	ENST00000584737	RP11-721K1.1	GENCODE	1126	chr17	-	13536953	13538079	CGTGTGGACAATCTAACTACCAATATCATCCTTTACGTAACTCCTTAACTCCCTTTAAAC	intergenic							4.21812	5.32345
ASHGA5P027787	0.00954161	0.0461336	2.15144	down	noncoding	TCONS_00010156	XLOC_004622	LincRNAs identified by Cabili et al	268	chr5	+	160486910	160509390	CAATACCACGCTTCCTCATCTCTGTAAAGCTTACATTTTAATCCTCATACAAGCTTTTGA	intergenic							3.87414	4.97944
ASHGA5P034747	0.000368546	0.0169073	2.15143	down	noncoding	TCONS_00004641	XLOC_002554	LincRNAs identified by Cabili et al	1867	chr2	-	242671428	242673870	ATGATTCAAAACCCATAAAGATTACCACCCATACCATCCCCTAAAATAACTGATTTTTCT	intergenic							6.35626	7.46156
ASHGA5P058209	0.00628677	0.0410595	2.15071	down	noncoding	TCONS_00028198	XLOC_013549	LincRNAs identified by Cabili et al	2244	chr20	+	46750576	46755530	CCTCAAAAAGGTCTGCAGCTTCCAGTCCCTCAAATAACAACATTGCTCCTCCCTGGATCT	intergenic							5.40775	6.51256
ASHGA5P029128	0.0169052	0.0605576	2.15048	down	noncoding	ENST00000557625	FRMD6-AS2	GENCODE	581	chr14	-	52013346	52066638	CTCACCCTCCAAAATACTTACAGATGTGTCTCCTCTTTTTTGTAAAATAAATGCTCTTCT	intronic antisense	NM_001042481	FRMD6	FERM domain-containing protein 6 isoform 1	+	51955838	52197444	4.58544	5.69009
ASHGA5P055254	0.0176617	0.0619468	2.1501	down	noncoding	ENST00000489396	RP11-320N7.1	pseudogene	507	chr12	-	4218874	4219381	ATTGTTAATGAGTCACAGAAACTGGCCACCTCTGTCTCTCTCCCATATGATGGGGAAGAT								7.38396	8.48836
ASHGA5P037692	0.000421637	0.0180833	2.15005	down	noncoding	ENST00000454123	RP1-5O6.4	GENCODE	541	chr22	-	38783922	38784862	AAGGGGGTGTTTGGGCACTTAGATTGGATGCAGATTTGTTTGTATATGAAACAGATTTTA	intron sense-overlapping	ENST00000400206	CSNK1E	casein kinase 1, epsilon [Source:HGNC Symbol;Acc:2453]	-	38687372	38794527	4.59301	5.69738
ASHGA5P014784	0.00429476	0.0383369	2.14619	down	noncoding	ENST00000413332	RP13-15E13.1	GENCODE	634	chr1	+	3816935	3822096	TTCACTCAAGCCCACCCTCTCCTATCCTCTCGGTCCACCCGACTTAGCTGGGCAAAAATA	bidirectional	NM_207356	C1orf174	UPF0688 protein C1orf174	-	3805696	3816857	8.11325	9.21503
ASHGA5P028376	0.0123462	0.0514204	2.14184	down	noncoding	ENST00000544711	RP11-407A16.7	GENCODE	339	chr12	+	127175024	127176464	GATGTCCCACAGCCCATAGCAAATACAGGGCATATTAAGTTCAAATAAATATATGCAAAT	intergenic							3.65414	4.75298
ASHGA5P036915	0.00129324	0.027164	2.14153	down	noncoding	TCONS_00025896	XLOC_012177	LincRNAs identified by Cabili et al	534	chr17	+	33640679	33651908	AAATTCCATTTGCTTGGACCCACTGCATTCCATCCCTTGTGGAAGAGAGCATGTAAGCAA	intergenic							11.1134	12.212
ASHGA5P000081	0.0140739	0.0547577	2.14032	down	noncoding	AW449870		LincRNAs identified by Khalil et al	388	chr9	+	73077075	73165409	AGCTTAACAGTTTTTCACCTTCTCCTCTTTTTCCTGCCTGGAACATGAATGTGATGACTG	intronic antisense	ENST00000357533	TRPM3	transient receptor potential cation channel, subfamily M, member 3 [Source:HGNC Symbol;Acc:17992]	-	73150859	74061751	4.88614	5.98397
ASHGA5P000081	0.0140739	0.0547577	2.14032	down	noncoding	AW449870		LincRNAs identified by Khalil et al	388	chr9	+	73077075	73165409	AGCTTAACAGTTTTTCACCTTCTCCTCTTTTTCCTGCCTGGAACATGAATGTGATGACTG	intronic antisense	ENST00000358082	TRPM3	transient receptor potential cation channel, subfamily M, member 3 [Source:HGNC Symbol;Acc:17992]	-	73150868	73477826	4.88614	5.98397
ASHGA5P000081	0.0140739	0.0547577	2.14032	down	noncoding	AW449870		LincRNAs identified by Khalil et al	388	chr9	+	73077075	73165409	AGCTTAACAGTTTTTCACCTTCTCCTCTTTTTCCTGCCTGGAACATGAATGTGATGACTG	intronic antisense	ENST00000360823	TRPM3	transient receptor potential cation channel, subfamily M, member 3 [Source:HGNC Symbol;Acc:17992]	-	73149967	73483974	4.88614	5.98397
ASHGA5P000081	0.0140739	0.0547577	2.14032	down	noncoding	AW449870		LincRNAs identified by Khalil et al	388	chr9	+	73077075	73165409	AGCTTAACAGTTTTTCACCTTCTCCTCTTTTTCCTGCCTGGAACATGAATGTGATGACTG	intronic antisense	ENST00000377105	TRPM3	transient receptor potential cation channel, subfamily M, member 3 [Source:HGNC Symbol;Acc:17992]	-	73149967	73483974	4.88614	5.98397
ASHGA5P000081	0.0140739	0.0547577	2.14032	down	noncoding	AW449870		LincRNAs identified by Khalil et al	388	chr9	+	73077075	73165409	AGCTTAACAGTTTTTCACCTTCTCCTCTTTTTCCTGCCTGGAACATGAATGTGATGACTG	intronic antisense	ENST00000377106	TRPM3	transient receptor potential cation channel, subfamily M, member 3 [Source:HGNC Symbol;Acc:17992]	-	73149967	73483974	4.88614	5.98397
ASHGA5P000081	0.0140739	0.0547577	2.14032	down	noncoding	AW449870		LincRNAs identified by Khalil et al	388	chr9	+	73077075	73165409	AGCTTAACAGTTTTTCACCTTCTCCTCTTTTTCCTGCCTGGAACATGAATGTGATGACTG	intronic antisense	ENST00000377110	TRPM3	transient receptor potential cation channel, subfamily M, member 3 [Source:HGNC Symbol;Acc:17992]	-	73149967	73736514	4.88614	5.98397
ASHGA5P000081	0.0140739	0.0547577	2.14032	down	noncoding	AW449870		LincRNAs identified by Khalil et al	388	chr9	+	73077075	73165409	AGCTTAACAGTTTTTCACCTTCTCCTCTTTTTCCTGCCTGGAACATGAATGTGATGACTG	intronic antisense	ENST00000377111	TRPM3	transient receptor potential cation channel, subfamily M, member 3 [Source:HGNC Symbol;Acc:17992]	-	73149948	73736514	4.88614	5.98397
ASHGA5P000081	0.0140739	0.0547577	2.14032	down	noncoding	AW449870		LincRNAs identified by Khalil et al	388	chr9	+	73077075	73165409	AGCTTAACAGTTTTTCACCTTCTCCTCTTTTTCCTGCCTGGAACATGAATGTGATGACTG	intronic antisense	ENST00000396280	TRPM3	transient receptor potential cation channel, subfamily M, member 3 [Source:HGNC Symbol;Acc:17992]	-	73150868	73461508	4.88614	5.98397
ASHGA5P000081	0.0140739	0.0547577	2.14032	down	noncoding	AW449870		LincRNAs identified by Khalil et al	388	chr9	+	73077075	73165409	AGCTTAACAGTTTTTCACCTTCTCCTCTTTTTCCTGCCTGGAACATGAATGTGATGACTG	intronic antisense	ENST00000396285	TRPM3	transient receptor potential cation channel, subfamily M, member 3 [Source:HGNC Symbol;Acc:17992]	-	73150868	73477826	4.88614	5.98397
ASHGA5P000081	0.0140739	0.0547577	2.14032	down	noncoding	AW449870		LincRNAs identified by Khalil et al	388	chr9	+	73077075	73165409	AGCTTAACAGTTTTTCACCTTCTCCTCTTTTTCCTGCCTGGAACATGAATGTGATGACTG	intronic antisense	ENST00000396292	TRPM3	transient receptor potential cation channel, subfamily M, member 3 [Source:HGNC Symbol;Acc:17992]	-	73150868	73477826	4.88614	5.98397
ASHGA5P000081	0.0140739	0.0547577	2.14032	down	noncoding	AW449870		LincRNAs identified by Khalil et al	388	chr9	+	73077075	73165409	AGCTTAACAGTTTTTCACCTTCTCCTCTTTTTCCTGCCTGGAACATGAATGTGATGACTG	intronic antisense	ENST00000408909	TRPM3	transient receptor potential cation channel, subfamily M, member 3 [Source:HGNC Symbol;Acc:17992]	-	73150868	73477826	4.88614	5.98397
ASHGA5P000081	0.0140739	0.0547577	2.14032	down	noncoding	AW449870		LincRNAs identified by Khalil et al	388	chr9	+	73077075	73165409	AGCTTAACAGTTTTTCACCTTCTCCTCTTTTTCCTGCCTGGAACATGAATGTGATGACTG	intronic antisense	ENST00000423814	TRPM3	transient receptor potential cation channel, subfamily M, member 3 [Source:HGNC Symbol;Acc:17992]	-	73150868	74061751	4.88614	5.98397
ASHGA5P000081	0.0140739	0.0547577	2.14032	down	noncoding	AW449870		LincRNAs identified by Khalil et al	388	chr9	+	73077075	73165409	AGCTTAACAGTTTTTCACCTTCTCCTCTTTTTCCTGCCTGGAACATGAATGTGATGACTG	intronic antisense	NM_001007471	TRPM3	transient receptor potential cation channel subfamily M member 3 isoform k	-	73149965	73736514	4.88614	5.98397
ASHGA5P000081	0.0140739	0.0547577	2.14032	down	noncoding	AW449870		LincRNAs identified by Khalil et al	388	chr9	+	73077075	73165409	AGCTTAACAGTTTTTCACCTTCTCCTCTTTTTCCTGCCTGGAACATGAATGTGATGACTG	intronic antisense	NM_020952	TRPM3	transient receptor potential cation channel subfamily M member 3 isoform a	-	73149965	73483974	4.88614	5.98397
ASHGA5P000081	0.0140739	0.0547577	2.14032	down	noncoding	AW449870		LincRNAs identified by Khalil et al	388	chr9	+	73077075	73165409	AGCTTAACAGTTTTTCACCTTCTCCTCTTTTTCCTGCCTGGAACATGAATGTGATGACTG	intronic antisense	NM_024971	TRPM3	transient receptor potential cation channel subfamily M member 3 isoform b	-	73149965	73483974	4.88614	5.98397
ASHGA5P000081	0.0140739	0.0547577	2.14032	down	noncoding	AW449870		LincRNAs identified by Khalil et al	388	chr9	+	73077075	73165409	AGCTTAACAGTTTTTCACCTTCTCCTCTTTTTCCTGCCTGGAACATGAATGTGATGACTG	intronic antisense	NM_206944	TRPM3	transient receptor potential cation channel subfamily M member 3 isoform d	-	73149965	73483974	4.88614	5.98397
ASHGA5P000081	0.0140739	0.0547577	2.14032	down	noncoding	AW449870		LincRNAs identified by Khalil et al	388	chr9	+	73077075	73165409	AGCTTAACAGTTTTTCACCTTCTCCTCTTTTTCCTGCCTGGAACATGAATGTGATGACTG	intronic antisense	NM_206945	TRPM3	transient receptor potential cation channel subfamily M member 3 isoform e	-	73149965	73483974	4.88614	5.98397
ASHGA5P000081	0.0140739	0.0547577	2.14032	down	noncoding	AW449870		LincRNAs identified by Khalil et al	388	chr9	+	73077075	73165409	AGCTTAACAGTTTTTCACCTTCTCCTCTTTTTCCTGCCTGGAACATGAATGTGATGACTG	intronic antisense	NM_206946	TRPM3	transient receptor potential cation channel subfamily M member 3 isoform f	-	73149965	73483974	4.88614	5.98397
ASHGA5P000081	0.0140739	0.0547577	2.14032	down	noncoding	AW449870		LincRNAs identified by Khalil et al	388	chr9	+	73077075	73165409	AGCTTAACAGTTTTTCACCTTCTCCTCTTTTTCCTGCCTGGAACATGAATGTGATGACTG	intronic antisense	NM_206947	TRPM3	transient receptor potential cation channel subfamily M member 3 isoform g	-	73149965	73483974	4.88614	5.98397
ASHGA5P015942	0.00105035	0.0258525	2.14001	down	noncoding	ENST00000425045	DNM1P46	GENCODE	591	chr15	-	100340133	100345136	AAGACCGTGTGGGACCTCATGACCAAGGAGTTCATCTTCTCGGAGCTGCTGTCCAACCTG	intergenic							3.40067	4.49829
ASHGA5P008348	0.00335056	0.0361534	2.13885	down	noncoding	NR_033818	IKBKB	RefSeq	4187	chr8	+	42128819	42190171	TGGTGCCCCTCCTCTGCGCTTAGATACCTTCATGAAAACAGAATCATCCATCGGGATCTA	exon sense-overlapping	NM_001190720	IKBKB	inhibitor of nuclear factor kappa-B kinase subunit beta isoform 2	+	42128819	42190171	7.97256	9.06939
ASHGA5P008348	0.00335056	0.0361534	2.13885	down	noncoding	NR_033818	IKBKB	RefSeq	4187	chr8	+	42128819	42190171	TGGTGCCCCTCCTCTGCGCTTAGATACCTTCATGAAAACAGAATCATCCATCGGGATCTA	exon sense-overlapping	NM_001242778	IKBKB	inhibitor of nuclear factor kappa-B kinase subunit beta isoform 5	+	42128819	42190171	7.97256	9.06939
ASHGA5P008348	0.00335056	0.0361534	2.13885	down	noncoding	NR_033818	IKBKB	RefSeq	4187	chr8	+	42128819	42190171	TGGTGCCCCTCCTCTGCGCTTAGATACCTTCATGAAAACAGAATCATCCATCGGGATCTA	exon sense-overlapping	NM_001556	IKBKB	inhibitor of nuclear factor kappa-B kinase subunit beta isoform 1	+	42128819	42190171	7.97256	9.06939
ASHGA5P058263	1.44517e-05	0.00758285	2.13842	down	noncoding	TCONS_00028722	XLOC_013827	LincRNAs identified by Cabili et al	482	chr20	-	59044634	59048080	AGGTTGCCTGTGCCTAAAGCATCATTCCGTCCCACTCTGACATTTGTTCTCTGACGTCTT	intergenic							4.35067	5.44722
ASHGA5P039722	0.000845944	0.0242759	2.13773	down	noncoding	NR_024008	WWC2-AS2	RefSeq	2179	chr4	-	184018173	184020352	GCACCAAACCAAACCATTCTTATTTAAACCTTGCTTCCTAGCTTATTTATTTCCCAAACA	bidirectional	NM_024949	WWC2	protein WWC2	+	184020462	184241929	3.89305	4.98913
ASHGA5P028697	0.00735068	0.0427228	2.13588	down	noncoding	ENST00000447784	RP11-442J17.2	GENCODE	560	chr13	+	19479578	19481950	AAAGTCTTTATTAACTTTTGCCTTCAAGAACCTGCAGTGTTGAGCCCTTTTTTATTTCTG	intergenic							3.18576	4.28059
ASHGA5P031326	0.0468906	0.112834	2.1308	down	noncoding	ENST00000564411	RP11-525K10.3	GENCODE	364	chr16	-	80541465	80574764	GTGCCTCCTCCGAAGATACTAGACAACTATGAGTCAAATTAAAATGCTTCCTTTGCAACA	natural antisense	ENST00000562982	DYNLRB2	dynein, light chain, roadblock-type 2 [Source:HGNC Symbol;Acc:15467]	+	80574630	80584538	5.46003	6.55143
ASHGA5P028715	0.0452706	0.110525	2.13034	down	noncoding	ENST00000453309	RP11-101P17.11	GENCODE	677	chr13	+	21861544	21868997	CTCTCACTTGCTGTCACTCTGAATTATTTGCTTACAGAATAAACATAACTTTGTGTCCAA	intergenic							3.20819	4.29928
ASHGA5P057420	0.000127443	0.0127748	2.13034	down	noncoding	TCONS_00017155	XLOC_007957	LincRNAs identified by Cabili et al	265	chrX	+	39681270	39681758	GGCTCCAACTGGGACCCTCCGGCTTTCTGAAGAAGTTTATCCAGCTCTACAAGCTAGGCG	intergenic							4.27543	5.36652
ASHGA5P034900	0.0233057	0.0728482	2.13014	down	noncoding	ENST00000422415	AC010145.4	GENCODE	517	chr2	-	16137170	16203007	ATGCCTCTCAAGGCTCCTTTTCCTCCTTACAAACAAAATAAAACAAATCCTTCCTATGGA	intergenic							4.72908	5.82003
ASHGA5P038544	0.0214211	0.0695506	2.12998	down	noncoding	ENST00000416017	RP4-612J11.1	GENCODE	588	chr1	+	75055418	75087403	GGCTTGGTCTCCACATCTGCTTTTGTTATTTCTTGGTCTTCAATTTCAATTTCTAAGGAT	natural antisense	NM_001002912	C1orf173	uncharacterized protein C1orf173	-	75033794	75139422	4.47942	5.57026
ASHGA5P042259	0.0222705	0.0711315	2.12891	down	noncoding	ENST00000443928	RP11-404F10.2	GENCODE	791	chr1	+	160643135	160653612	CTGGCTGGTGGAACTTGAATGTATACAACACTCTTCATTTGCATGTTTTGACATTTTAAA	intronic antisense	NM_001256030	CD48	CD48 antigen isoform 2 precursor	-	160650211	160681641	4.33276	5.42287
ASHGA5P042259	0.0222705	0.0711315	2.12891	down	noncoding	ENST00000443928	RP11-404F10.2	GENCODE	791	chr1	+	160643135	160653612	CTGGCTGGTGGAACTTGAATGTATACAACACTCTTCATTTGCATGTTTTGACATTTTAAA	natural antisense	NM_001778	CD48	CD48 antigen isoform 1 precursor	-	160648535	160681641	4.33276	5.42287
ASHGA5P031797	0.00208034	0.0314014	2.12824	down	noncoding	ENST00000563090	RP11-413H22.2	GENCODE	549	chr16	+	56443231	56445595	GAGAACTTAAACACACTGTACTCTGACCAGATATCTTTTGTAGAGAACAAAATAAAGTGG	natural antisense	NM_001144	AMFR	E3 ubiquitin-protein ligase AMFR	-	56395363	56459450	3.98929	5.07896
ASHGA5P048615	0.0401733	0.102614	2.12809	down	noncoding	TCONS_00003565	XLOC_001338	LincRNAs identified by Cabili et al	344	chr2	+	9714395	9715751	ACCCCCCCCAAAAAAGCACCACCTGTCAAGGAGAATGGCATGGCGACATGGCTGAAACAC	intergenic							11.543	12.6326
ASHGA5P055765	0.00286281	0.0347481	2.12781	down	noncoding	TCONS_00004873	XLOC_001628	LincRNAs identified by Cabili et al	243	chr2	+	113436308	113437490	CAGCCAAACTGAGCCCTTCTCAAATCCCTGATCCTCCAAATGTAGGCAAAATAAATTGCT	intergenic							7.07374	8.1631
ASHGA5P057893	0.00862699	0.0443672	2.12512	down	noncoding	TCONS_00023350	XLOC_011212	LincRNAs identified by Cabili et al	261	chr15	+	36782441	36799342	ATTCACCACGGCAGCACATCACCTCCAGAGTGAAGAAAAGTTTCAAACATCAGGAAAAAA	intergenic							4.14375	5.23129
ASHGA5P000375	0.000919458	0.0253095	2.12454	down	noncoding	chr20:24726575-24738550-	chr20:24726575-24738550	LincRNAs identified by Khalil et al	11975	chr20	-	24778575	24790550	GCTCTCTGGCCTTTCCTGACCTTCGTGAGCTTGTTGCTTCTGGAGCCCACAGATCAGTCA	intergenic							5.28392	6.37108
ASHGA5P039950	0.00938055	0.0458497	2.12419	down	noncoding	ENST00000511962	RP11-319E12.2	GENCODE	783	chr4	+	58357555	58361399	AGCCAGCCCTGAAACGAGCCTCTCAACTTCTGATAGGTTATATTTACATTTATGTACTTT	intergenic							5.92104	7.00795
ASHGA5P058625	0.0167081	0.0603279	2.12346	down	noncoding	uc011csb.2	PMCHL2	UCSC_knowngene	733	chr5	+	70671611	70681820	GCCATTTGTGATAGTTATGACTCAAGGCTTTGAGAATGTAAAGAGACGCCCTTCACATGT	intergenic							3.88439	4.97081
ASHGA5P021309	0.00222052	0.0318932	2.12285	down	noncoding	uc001miu.3	MRVI1-AS1	UCSC_knowngene	619	chr11	+	10562786	10621479	GAGAACACAGCCACCCTCATCAGCCAGAGTTCAAACCCTGACAGTGCCCATGGAGAGATC	intronic antisense	NM_006691	LYVE1	lymphatic vessel endothelial hyaluronic acid receptor 1 precursor	-	10579412	10590365	5.96365	7.04966
ASHGA5P021309	0.00222052	0.0318932	2.12285	down	noncoding	uc001miu.3	MRVI1-AS1	UCSC_knowngene	619	chr11	+	10562786	10621479	GAGAACACAGCCACCCTCATCAGCCAGAGTTCAAACCCTGACAGTGCCCATGGAGAGATC	natural antisense	NM_001098579	MRVI1	protein MRVI1 isoform a	-	10594637	10673848	5.96365	7.04966
ASHGA5P021309	0.00222052	0.0318932	2.12285	down	noncoding	uc001miu.3	MRVI1-AS1	UCSC_knowngene	619	chr11	+	10562786	10621479	GAGAACACAGCCACCCTCATCAGCCAGAGTTCAAACCCTGACAGTGCCCATGGAGAGATC	natural antisense	NM_001100163	MRVI1	protein MRVI1 isoform b	-	10594637	10715535	5.96365	7.04966
ASHGA5P021309	0.00222052	0.0318932	2.12285	down	noncoding	uc001miu.3	MRVI1-AS1	UCSC_knowngene	619	chr11	+	10562786	10621479	GAGAACACAGCCACCCTCATCAGCCAGAGTTCAAACCCTGACAGTGCCCATGGAGAGATC	natural antisense	NM_001100167	MRVI1	protein MRVI1 isoform c	-	10594637	10715121	5.96365	7.04966
ASHGA5P021309	0.00222052	0.0318932	2.12285	down	noncoding	uc001miu.3	MRVI1-AS1	UCSC_knowngene	619	chr11	+	10562786	10621479	GAGAACACAGCCACCCTCATCAGCCAGAGTTCAAACCCTGACAGTGCCCATGGAGAGATC	natural antisense	NM_001206880	MRVI1	protein MRVI1 isoform e	-	10594637	10715535	5.96365	7.04966
ASHGA5P021309	0.00222052	0.0318932	2.12285	down	noncoding	uc001miu.3	MRVI1-AS1	UCSC_knowngene	619	chr11	+	10562786	10621479	GAGAACACAGCCACCCTCATCAGCCAGAGTTCAAACCCTGACAGTGCCCATGGAGAGATC	natural antisense	NM_001206881	MRVI1	protein MRVI1 isoform c	-	10594637	10715535	5.96365	7.04966
ASHGA5P021309	0.00222052	0.0318932	2.12285	down	noncoding	uc001miu.3	MRVI1-AS1	UCSC_knowngene	619	chr11	+	10562786	10621479	GAGAACACAGCCACCCTCATCAGCCAGAGTTCAAACCCTGACAGTGCCCATGGAGAGATC	natural antisense	NM_130385	MRVI1	protein MRVI1 isoform d	-	10594637	10715535	5.96365	7.04966
ASHGA5P042970	0.00273534	0.034363	2.1227	down	noncoding	TCONS_00020083	XLOC_009474	LincRNAs identified by Cabili et al	344	chr11	-	65269760	65278498	CCTTCAGGATCATTAAGCCACTTCCTTTGCTCTGCAGTTTCTATAGTAGTTTTAAATTAT	intergenic							5.88272	6.96863
ASHGA5P029070	0.0394337	0.101315	2.12214	down	noncoding	TCONS_00010352	XLOC_004841	LincRNAs identified by Cabili et al	487	chr5	-	60617341	60627805	ACTTCCCCCTCCAGTTCTCAGCTTCTCTTTGAAGTCCGAGAAGTGAGGATGCGCCTCGTG	intergenic							7.67175	8.75727
ASHGA5P044562	0.0149619	0.056589	2.12095	down	noncoding	ENST00000501440	CTD-3064M3.4	GENCODE	1380	chr8	-	142400038	142402674	GCAGCCCCTTCCCGTTTCACTGTGGCTGCATTTTAATTCTTATTTTTTAAATGTTTAGCT	intronic antisense	ENST00000520105	PTP4A3	protein tyrosine phosphatase type IVA, member 3 [Source:HGNC Symbol;Acc:9636]	+	142402094	142441620	5.58734	6.67205
ASHGA5P044562	0.0149619	0.056589	2.12095	down	noncoding	ENST00000501440	CTD-3064M3.4	GENCODE	1380	chr8	-	142400038	142402674	GCAGCCCCTTCCCGTTTCACTGTGGCTGCATTTTAATTCTTATTTTTTAAATGTTTAGCT	intronic antisense	ENST00000521578	PTP4A3	protein tyrosine phosphatase type IVA, member 3 [Source:HGNC Symbol;Acc:9636]	+	142402092	142441394	5.58734	6.67205
ASHGA5P044562	0.0149619	0.056589	2.12095	down	noncoding	ENST00000501440	CTD-3064M3.4	GENCODE	1380	chr8	-	142400038	142402674	GCAGCCCCTTCCCGTTTCACTGTGGCTGCATTTTAATTCTTATTTTTTAAATGTTTAGCT	intronic antisense	ENST00000523147	PTP4A3	protein tyrosine phosphatase type IVA, member 3 [Source:HGNC Symbol;Acc:9636]	+	142402120	142437051	5.58734	6.67205
ASHGA5P027323	0.00118163	0.0266435	2.12073	down	noncoding	ENST00000513381	RP11-834C11.5	GENCODE	499	chr12	-	54478915	54519614	AGCAATTTTCTCCCTCTCCAGGCCTCTTACAGATGTGAAACAACTGGCAGATCTGACTTT	intergenic							6.6425	7.72706
ASHGA5P026038	0.00772651	0.0433457	2.12048	down	noncoding	ENST00000530526	RP11-791J7.2	GENCODE	429	chr11	-	125440179	125462463	ATAACCTGCCACAATTTGAGAACACACACACAGACTGAATGACACAGGGGGAATCCTACA	intronic antisense	NM_001007277	EI24	etoposide-induced protein 2.4 homolog isoform 2	+	125439297	125454575	6.98332	8.06771
ASHGA5P026038	0.00772651	0.0433457	2.12048	down	noncoding	ENST00000530526	RP11-791J7.2	GENCODE	429	chr11	-	125440179	125462463	ATAACCTGCCACAATTTGAGAACACACACACAGACTGAATGACACAGGGGGAATCCTACA	intronic antisense	NM_004879	EI24	etoposide-induced protein 2.4 homolog isoform 1	+	125439297	125454575	6.98332	8.06771
ASHGA5P051426	0.0263892	0.0782176	2.12001	down	noncoding	ENST00000448208	SGOL1-AS1	GENCODE	819	chr3	+	20215735	20227919	AACCCTCCGTCTCTTTTTCATCTGTGTATTTCAGTGCTCTTTTAGCTAGAGGCCTGGTGA	natural antisense	NM_001012409	SGOL1	shugoshin-like 1 isoform A1	-	20209935	20227698	5.43048	6.51455
ASHGA5P051426	0.0263892	0.0782176	2.12001	down	noncoding	ENST00000448208	SGOL1-AS1	GENCODE	819	chr3	+	20215735	20227919	AACCCTCCGTCTCTTTTTCATCTGTGTATTTCAGTGCTCTTTTAGCTAGAGGCCTGGTGA	natural antisense	NM_001012410	SGOL1	shugoshin-like 1 isoform A2	-	20202084	20227698	5.43048	6.51455
ASHGA5P051426	0.0263892	0.0782176	2.12001	down	noncoding	ENST00000448208	SGOL1-AS1	GENCODE	819	chr3	+	20215735	20227919	AACCCTCCGTCTCTTTTTCATCTGTGTATTTCAGTGCTCTTTTAGCTAGAGGCCTGGTGA	natural antisense	NM_001012411	SGOL1	shugoshin-like 1 isoform B1	-	20209935	20227698	5.43048	6.51455
ASHGA5P051426	0.0263892	0.0782176	2.12001	down	noncoding	ENST00000448208	SGOL1-AS1	GENCODE	819	chr3	+	20215735	20227919	AACCCTCCGTCTCTTTTTCATCTGTGTATTTCAGTGCTCTTTTAGCTAGAGGCCTGGTGA	natural antisense	NM_001012412	SGOL1	shugoshin-like 1 isoform B2	-	20202084	20227698	5.43048	6.51455
ASHGA5P051426	0.0263892	0.0782176	2.12001	down	noncoding	ENST00000448208	SGOL1-AS1	GENCODE	819	chr3	+	20215735	20227919	AACCCTCCGTCTCTTTTTCATCTGTGTATTTCAGTGCTCTTTTAGCTAGAGGCCTGGTGA	natural antisense	NM_001012413	SGOL1	shugoshin-like 1 isoform C1	-	20209935	20227698	5.43048	6.51455
ASHGA5P051426	0.0263892	0.0782176	2.12001	down	noncoding	ENST00000448208	SGOL1-AS1	GENCODE	819	chr3	+	20215735	20227919	AACCCTCCGTCTCTTTTTCATCTGTGTATTTCAGTGCTCTTTTAGCTAGAGGCCTGGTGA	natural antisense	NM_001199251	SGOL1	shugoshin-like 1 isoform A1	-	20209935	20227724	5.43048	6.51455
ASHGA5P051426	0.0263892	0.0782176	2.12001	down	noncoding	ENST00000448208	SGOL1-AS1	GENCODE	819	chr3	+	20215735	20227919	AACCCTCCGTCTCTTTTTCATCTGTGTATTTCAGTGCTCTTTTAGCTAGAGGCCTGGTGA	natural antisense	NM_001199252	SGOL1	shugoshin-like 1 isoform A2	-	20202084	20227724	5.43048	6.51455
ASHGA5P051426	0.0263892	0.0782176	2.12001	down	noncoding	ENST00000448208	SGOL1-AS1	GENCODE	819	chr3	+	20215735	20227919	AACCCTCCGTCTCTTTTTCATCTGTGTATTTCAGTGCTCTTTTAGCTAGAGGCCTGGTGA	natural antisense	NM_001199253	SGOL1	shugoshin-like 1 isoform B1	-	20209935	20227724	5.43048	6.51455
ASHGA5P051426	0.0263892	0.0782176	2.12001	down	noncoding	ENST00000448208	SGOL1-AS1	GENCODE	819	chr3	+	20215735	20227919	AACCCTCCGTCTCTTTTTCATCTGTGTATTTCAGTGCTCTTTTAGCTAGAGGCCTGGTGA	natural antisense	NM_001199254	SGOL1	shugoshin-like 1 isoform B2	-	20202084	20227724	5.43048	6.51455
ASHGA5P051426	0.0263892	0.0782176	2.12001	down	noncoding	ENST00000448208	SGOL1-AS1	GENCODE	819	chr3	+	20215735	20227919	AACCCTCCGTCTCTTTTTCATCTGTGTATTTCAGTGCTCTTTTAGCTAGAGGCCTGGTGA	natural antisense	NM_001199255	SGOL1	shugoshin-like 1 isoform C1	-	20209935	20227724	5.43048	6.51455
ASHGA5P051426	0.0263892	0.0782176	2.12001	down	noncoding	ENST00000448208	SGOL1-AS1	GENCODE	819	chr3	+	20215735	20227919	AACCCTCCGTCTCTTTTTCATCTGTGTATTTCAGTGCTCTTTTAGCTAGAGGCCTGGTGA	natural antisense	NM_001199256	SGOL1	shugoshin-like 1 isoform C2	-	20202084	20227724	5.43048	6.51455
ASHGA5P051426	0.0263892	0.0782176	2.12001	down	noncoding	ENST00000448208	SGOL1-AS1	GENCODE	819	chr3	+	20215735	20227919	AACCCTCCGTCTCTTTTTCATCTGTGTATTTCAGTGCTCTTTTAGCTAGAGGCCTGGTGA	natural antisense	NM_001199257	SGOL1	shugoshin-like 1 isoform D1	-	20202084	20227724	5.43048	6.51455
ASHGA5P051426	0.0263892	0.0782176	2.12001	down	noncoding	ENST00000448208	SGOL1-AS1	GENCODE	819	chr3	+	20215735	20227919	AACCCTCCGTCTCTTTTTCATCTGTGTATTTCAGTGCTCTTTTAGCTAGAGGCCTGGTGA	natural antisense	NM_138484	SGOL1	shugoshin-like 1 isoform C2	-	20202084	20227698	5.43048	6.51455
ASHGA5P040137	0.0123086	0.0513101	2.1189	down	noncoding	ENST00000425124	BX571672.3	GENCODE	470	chr1	+	143188827	143189695	TAGATGGGAGCAAGTGTCCAATACAGCAACAGCTGGAAAGAAAAATAAAGAATTTTGTTC	intergenic							3.72207	4.80539
ASHGA5P029818	0.000446404	0.0185419	2.1178	down	noncoding	ENST00000556528	RP11-260M19.2	GENCODE	509	chr14	+	104689930	104741966	ACGCCCACCCTGTCTCAGAGAGACTTATTTTTCCTTCTTCAATGTCGTCAGGCTTTGCCT	intron sense-overlapping	ENST00000419115	C14orf144	chromosome 14 open reading frame 144 [Source:HGNC Symbol;Acc:20358]	+	104710540	104712473	5.96922	7.05179
ASHGA5P047179	0.00769825	0.0433457	2.11718	down	noncoding	TCONS_00014912	XLOC_006978	LincRNAs identified by Cabili et al	388	chr8	-	2387146	2415857	ATGTCACTGGTTTTCTGCTGCCCCTTTTGGCTCCATTCCACGTGCGTCCATACAAACCGG	intergenic							7.31588	8.39802
ASHGA5P030388	0.011196	0.0491399	2.117	down	noncoding	uc010azb.1	AK307870	UCSC_knowngene	1559	chr15	+	28878268	28887567	CCTGTAGCTCTTCAGGCAAGCTGAATTGAACTCATGTTGCTTTTTCCCTTTTTGTTTCAG	intergenic							3.21651	4.29852
ASHGA5P019243	0.0123619	0.051445	2.11667	down	noncoding	ENST00000475102	RP11-550I24.2	GENCODE	384	chr3	+	156948067	157033684	ATCGTGAGTGGTTGTTGGATCTTTCCAGATCACCACACCACATCACCCAGCCACTCTGCC	intronic antisense	NM_001167911	VEPH1	ventricular zone-expressed PH domain-containing protein homolog 1 isoform 2	-	156977531	157221136	4.38651	5.4683
ASHGA5P019243	0.0123619	0.051445	2.11667	down	noncoding	ENST00000475102	RP11-550I24.2	GENCODE	384	chr3	+	156948067	157033684	ATCGTGAGTGGTTGTTGGATCTTTCCAGATCACCACACCACATCACCCAGCCACTCTGCC	intronic antisense	NM_001167912	VEPH1	ventricular zone-expressed PH domain-containing protein homolog 1 isoform 1	-	156977531	157221136	4.38651	5.4683
ASHGA5P019243	0.0123619	0.051445	2.11667	down	noncoding	ENST00000475102	RP11-550I24.2	GENCODE	384	chr3	+	156948067	157033684	ATCGTGAGTGGTTGTTGGATCTTTCCAGATCACCACACCACATCACCCAGCCACTCTGCC	intronic antisense	NM_024621	VEPH1	ventricular zone-expressed PH domain-containing protein homolog 1 isoform 1	-	156977531	157217445	4.38651	5.4683
ASHGA5P032284	0.00135342	0.0276104	2.11608	down	noncoding	ENST00000567574	RP11-218F4.1	GENCODE	1340	chr17	-	26256573	26301249	TGAGACCTGTGCCCCATTTCTGACTAATATTCTTCATGATATTGTATCACTCTGTATCAA	intergenic							5.46407	6.54546
ASHGA5P040133	0.00971358	0.0464078	2.11548	down	noncoding	ENST00000424474	BX571672.4	GENCODE	848	chr1	+	143154492	143169960	AGGTTTGCACTGACCAGACACCAAACAACTGGCAGCCAATAGGTCCCCACTCACCAAAAC	intergenic							4.69892	5.7799
ASHGA5P038795	0.000297549	0.0157153	2.11305	down	noncoding	TCONS_00023826	XLOC_011604	LincRNAs identified by Cabili et al	2041	chr15	-	98624859	98629005	TGAATGATGTCCACTCTGAGACCCCAGGCCACTCAGAAAAACTGAAGATTCTCAAGTTCA	intergenic							9.71561	10.7949
ASHGA5P039009	0.015637	0.0580703	2.11246	down	noncoding	ENST00000498923	NUDT16P	GENCODE	1706	chr3	+	131080755	131083375	ACCTTCCTTGCGGCGCTACTCTCGGGTGTCCCTGCCAATCCCAGCTTCCTCCTCTCTCAG	intergenic							6.3194	7.39832
ASHGA5P030535	0.00859379	0.0443672	2.11242	down	noncoding	ENST00000558237	RP11-120K9.2	GENCODE	606	chr15	+	50849797	50852697	CTTGTCTGTATCTATGAGATACACTACTAAATACAAATAAGCTTTATACTGCTCCCTTCC	natural antisense	NM_017672	TRPM7	transient receptor potential cation channel subfamily M member 7	-	50849351	50979012	4.48224	5.56114
ASHGA5P016564	0.0174802	0.0616892	2.11083	down	noncoding	ENST00000431722	RP5-1185I7.1	GENCODE	564	chr7	+	77619700	77624259	TTTGAAAACTCCGTTCCTCCCCTTCACCTCCACCTGATTATTCATGTCGTGAAGAAACTG	intergenic							10.0188	11.0966
ASHGA5P030979	0.00159235	0.0287561	2.11076	down	noncoding	ENST00000568317	RP11-82O18.2	GENCODE	579	chr16	-	14789423	14800912	AATGAAATTTCTACACAACAATGTTCTTGTCTCAAGTCCAAGAATGCCTCCTACACCTCC	intergenic							3.31742	4.39518
ASHGA5P007972	0.00608767	0.0406789	2.10873	down	noncoding	ENST00000338711	FAM86FP	pseudogene	969	chr12	-	8385107	8395544	ATATTTTGCAACTGTGAAGCATCCTGTGTGTGTGTGAAGCACCCGCCGTCAGTCAAGTAT								5.23665	6.31302
ASHGA5P017582	0.0167864	0.0604403	2.10802	down	noncoding	ENST00000443364	RP11-48O20.4	GENCODE	804	chr1	+	159931007	159946902	CACCCACCTCATTTTTCTAATAAGAGCTTTCAATAAACCTCTCTTTCTTGAAGTTACCTG	intergenic							4.10102	5.17691
ASHGA5P047877	0.000507781	0.019591	2.10744	down	noncoding	ENST00000529961	RP11-290F24.3	GENCODE	816	chr11	-	6129364	6206806	AAGAAAATTTTAATAATCTTTTCATCCTGTCCTCTCTCCAGCCTCTCCTCTACTACCAAG	intron sense-overlapping	NM_001004052	OR52B2	olfactory receptor 52B2	-	6190584	6191556	6.97868	8.05416
ASHGA5P047877	0.000507781	0.019591	2.10744	down	noncoding	ENST00000529961	RP11-290F24.3	GENCODE	816	chr11	-	6129364	6206806	AAGAAAATTTTAATAATCTTTTCATCCTGTCCTCTCTCCAGCCTCTCCTCTACTACCAAG	natural antisense	NM_001005181	OR56B4	olfactory receptor 56B4	+	6129008	6129968	6.97868	8.05416
ASHGA5P056475	0.00580884	0.0403622	2.10321	down	noncoding	TCONS_00004592	XLOC_002497	LincRNAs identified by Cabili et al	209	chr2	-	221614392	221618730	CTGACACTAAGTCCCTCTTCTGTAGGGCTCCTGCAGTTTTCCAGGGGTTCACTTCAGGTC	intergenic							4.57867	5.65127
ASHGA5P025791	0.0112472	0.0491399	2.10277	down	noncoding	NR_037791	RAB4B-EGLN2	RefSeq	2849	chr19	+	41284123	41314346	GTGGAGCCAGCCACCCTGAAGGGTCCCTTCCCAAGCCCTTAGGGACCGCAGAGGACTTGG	exon sense-overlapping	NM_016154	RAB4B	ras-related protein Rab-4B	+	41284123	41302849	5.47517	6.54746
ASHGA5P025791	0.0112472	0.0491399	2.10277	down	noncoding	NR_037791	RAB4B-EGLN2	RefSeq	2849	chr19	+	41284123	41314346	GTGGAGCCAGCCACCCTGAAGGGTCCCTTCCCAAGCCCTTAGGGACCGCAGAGGACTTGG	exon sense-overlapping	NM_053046	EGLN2	egl nine homolog 2	+	41305333	41314346	5.47517	6.54746
ASHGA5P025791	0.0112472	0.0491399	2.10277	down	noncoding	NR_037791	RAB4B-EGLN2	RefSeq	2849	chr19	+	41284123	41314346	GTGGAGCCAGCCACCCTGAAGGGTCCCTTCCCAAGCCCTTAGGGACCGCAGAGGACTTGG	exon sense-overlapping	NM_080732	EGLN2	egl nine homolog 2	+	41305047	41314346	5.47517	6.54746
ASHGA5P023055	0.0300029	0.0849162	2.10272	down	noncoding	ENST00000568730	RP11-56L13.1	GENCODE	425	chr16	-	32274228	32275108	CAGTAAACAGGTACTTTGTATTCTCAAATTGCATCTGCTTACCCTGGCCCCCTCAAAATG	intergenic							7.83676	8.90902
ASHGA5P014861	0.00130583	0.027304	2.10267	down	noncoding	ENST00000414107	RP11-446F3.2	GENCODE	756	chr10	-	2488446	2489546	TCAGTCAAAGGGAATCCCATCCAGCGTCCCTCTACTCTCCTCTGCAGCTTCCATGGTTGG	intergenic							6.49368	7.56591
ASHGA5P045474	0.000830251	0.0240747	2.10245	down	noncoding	ENST00000432418	RP11-123K19.1	GENCODE	423	chr9	-	129370391	129374798	GTTCGCCCCTTCCTGTAATTATTTGGTGTCTGGTAAAGTTTTTATGAGTGTTTGTGCAAA	intergenic							6.0769	7.14897
ASHGA5P031105	0.0113843	0.0493032	2.1022	down	noncoding	TCONS_00006092	XLOC_002701	LincRNAs identified by Cabili et al	466	chr3	+	71835019	71835668	TTTATGCCCACATCTGTTCCCGACCCTCTCCTCTGATTTTCCTCACATGTATTTCCTCCC	intergenic							6.83162	7.90352
ASHGA5P033839	0.0175791	0.0617984	2.10181	down	noncoding	uc002las.2	LOC284260	UCSC_knowngene	3322	chr18	+	39766634	40098918	ATCTCTCCCCATCCCATCGTTTCTAGCTTATAGCATATGAATAAATGCAGTTTCCAAGTT	intergenic							7.87714	8.94877
ASHGA5P023817	0.0114506	0.0494106	2.10136	down	noncoding	HMlincRNA53-	HMlincRNA53	LincRNAs identified by Khalil et al	5600	chr2	-	225083206	225088806	TTTCCACGACACATAACTAATTCTCATTGCTGTTTCTATTGGCAGATGTTTCCCTTCTTA	intergenic							3.34544	4.41676
ASHGA5P042651	0.00070339	0.0225597	2.10098	down	noncoding	uc003qgn.3	LINC00271	UCSC_knowngene	882	chr6	+	135818938	136037193	TAAACCTCCGCACTGCAAAACACACACATCCTAGATAATTAAAAGACAACTTCTACCAGA	bidirectional	NM_001134830	AHI1	jouberin isoform a	-	135605109	135818903	4.64327	5.71433
ASHGA5P042651	0.00070339	0.0225597	2.10098	down	noncoding	uc003qgn.3	LINC00271	UCSC_knowngene	882	chr6	+	135818938	136037193	TAAACCTCCGCACTGCAAAACACACACATCCTAGATAATTAAAAGACAACTTCTACCAGA	bidirectional	NM_001134831	AHI1	jouberin isoform a	-	135605109	135818903	4.64327	5.71433
ASHGA5P042651	0.00070339	0.0225597	2.10098	down	noncoding	uc003qgn.3	LINC00271	UCSC_knowngene	882	chr6	+	135818938	136037193	TAAACCTCCGCACTGCAAAACACACACATCCTAGATAATTAAAAGACAACTTCTACCAGA	bidirectional	NM_001134832	AHI1	jouberin isoform b	-	135708921	135818903	4.64327	5.71433
ASHGA5P042651	0.00070339	0.0225597	2.10098	down	noncoding	uc003qgn.3	LINC00271	UCSC_knowngene	882	chr6	+	135818938	136037193	TAAACCTCCGCACTGCAAAACACACACATCCTAGATAATTAAAAGACAACTTCTACCAGA	bidirectional	NM_017651	AHI1	jouberin isoform a	-	135605109	135818903	4.64327	5.71433
ASHGA5P031141	0.0323647	0.088869	2.09994	down	noncoding	ENST00000562945	RP11-488I20.9	GENCODE	2972	chr16	-	34427060	34430032	CCCTCTTCTGATCCTTCATCCTGGTAGCTTATATCCTGTTTTGCTGCATAATAAATAATT	intergenic							4.5342	5.60455
ASHGA5P045257	0.00124123	0.0269963	2.09779	down	noncoding	ENST00000412376	RP11-87H9.3	GENCODE	2033	chr9	-	69082535	69108793	AATGTGGAAACTTCAAACTGTTAAATGCACCCAGGTTAGTTTTGGTAATAGGTCTGAATA	intergenic							3.33492	4.40379
ASHGA5P043152	0.00297728	0.0353331	2.09738	down	noncoding	ENST00000275590	AC006014.8	GENCODE	980	chr7	-	75021228	75024708	ACAGTTTCTCCTGCGTAACCTTCTGCCTACCTTCCTGAGAGTGGTTGGTGACAGCAGCCG	natural antisense	ENST00000450434	TRIM73	tripartite motif containing 73 [Source:HGNC Symbol;Acc:18162]	+	75024336	75034896	4.25296	5.32155
ASHGA5P056180	0.000400458	0.0175839	2.09517	down	noncoding	TCONS_00000779	XLOC_000008	LincRNAs identified by Cabili et al	575	chr1	+	756410	758975	TGTCCAGCAGATCCGCCCTGTCTATACTACCGGCCTGTCCAGCAGATCCACTCTGTCTAT	intergenic							5.23573	6.30279
ASHGA5P043737	0.0245103	0.074887	2.09385	down	noncoding	ENST00000430941	AC004878.2	GENCODE	773	chr7	+	74855311	74864233	AACAATAAGGGAAATTGTGTATTTGCTGGGGGAGGGCTAAAGATGAGGATTCAAGGCCAG	intronic antisense	NM_001145064	GATSL2	GATS-like protein 2	-	74807604	74867341	3.28942	4.35557
ASHGA5P047220	0.00356877	0.0364387	2.09361	down	noncoding	ENST00000455525	RP11-433J20.2	GENCODE	633	chr10	+	4067131	4070586	GGAACATCATCCCTCATCACTGGAAGAAATTACAAGGATTGTGTAAACAATTACAAGTAT	intergenic							3.23848	4.30447
ASHGA5P022788	0.00228976	0.0320879	2.09359	down	noncoding	ENST00000562739	RP11-941F15.1	GENCODE	568	chr15	-	74211399	74220036	CGGGGTCAGGGAGCTCCTGCCTGCCTGGATGAAGAGGAGGTCAAGACTTTGTCCCCCACT	natural antisense	NM_005576	LOXL1	lysyl oxidase homolog 1 preproprotein	+	74218788	74244478	5.2193	6.28528
ASHGA5P016400	0.00207868	0.0314014	2.09341	down	noncoding	ENST00000430098	RP5-1028L10.1	GENCODE	482	chr1	-	110708807	110709805	CTGTCAGCTCCTTCTCATTCAGGGACCTAGGAAACCAGGATCCCCAGGTGATTTAAAAAA	natural antisense	NM_001010898	SLC6A17	sodium-dependent neutral amino acid transporter SLC6A17	+	110693131	110744823	3.74664	4.8125
ASHGA5P058522	0.00159981	0.0287561	2.09282	down	noncoding	uc009wdx.3	AK311400	UCSC_knowngene	1171	chr1	-	98509851	98511952	ACTAAACGCCCGTGGTTGCCAAGCGAAGAGGAAGCCACCGCCACCACACCCCTCAAGCAT	intergenic							6.5262	7.59164
ASHGA5P033423	0.000136578	0.0129833	2.09191	down	noncoding	ENST00000576554	RP11-498C9.3	GENCODE	565	chr17	+	79825597	79826428	TAGTGAGGCCCCACGGTACACTCCACATGTTAAGGCATCATGGTTAGACGGGACCGACAG	natural antisense	NM_001185077	ARHGDIA	rho GDP-dissociation inhibitor 1 isoform a	-	79825596	79828790	4.36212	5.42694
ASHGA5P033423	0.000136578	0.0129833	2.09191	down	noncoding	ENST00000576554	RP11-498C9.3	GENCODE	565	chr17	+	79825597	79826428	TAGTGAGGCCCCACGGTACACTCCACATGTTAAGGCATCATGGTTAGACGGGACCGACAG	natural antisense	NM_001185078	ARHGDIA	rho GDP-dissociation inhibitor 1 isoform b	-	79825596	79829282	4.36212	5.42694
ASHGA5P033423	0.000136578	0.0129833	2.09191	down	noncoding	ENST00000576554	RP11-498C9.3	GENCODE	565	chr17	+	79825597	79826428	TAGTGAGGCCCCACGGTACACTCCACATGTTAAGGCATCATGGTTAGACGGGACCGACAG	natural antisense	NM_004309	ARHGDIA	rho GDP-dissociation inhibitor 1 isoform a	-	79825596	79829282	4.36212	5.42694
ASHGA5P046340	0.0227117	0.0718183	2.09121	down	noncoding	ENST00000445415	AC004383.4	GENCODE	332	chrX	-	133677796	133678910	TTCTGCCTCTCACCAGCTTCCCCCTTTCTCCCCGTCCTGTACGGTTCCCCCTGGAGCCAG	intergenic							9.75994	10.8243
ASHGA5P058211	0.00155031	0.0285908	2.09107	down	noncoding	TCONS_00028204	XLOC_013552	LincRNAs identified by Cabili et al	5151	chr20	+	47099593	47105772	TCCTGTCCAGGTCACCAGCTCCAAGACTCTCAAACTAGAACAGCAGCACTGACTTCTTGC	intergenic							3.60777	4.67201
ASHGA5P030247	0.0326635	0.0894004	2.08778	down	noncoding	ENST00000565547	RP11-326A19.3	GENCODE	450	chr15	-	89630308	89631172	AACCCATTCCCCATTCTGAAGGTGTAGACATCACAGAGTGTGGACAGAAATAGCTTCTCA	intronic antisense	ENST00000569411	ABHD2	abhydrolase domain containing 2 [Source:HGNC Symbol;Acc:18717]	+	89630689	89698621	4.68255	5.74452
ASHGA5P044619	0.000131895	0.0128021	2.08763	down	noncoding	TCONS_00001219	XLOC_000492	LincRNAs identified by Cabili et al	1896	chr1	+	184632074	184634810	GAGTTTCTGTGCTATTAGGCTGTGTCTCATGTCCCCGTACAAAGTATCTTTGTATGGGAG	intergenic							4.63306	5.69492
ASHGA5P056985	1.55253e-05	0.00758285	2.08646	down	noncoding	TCONS_00011806	XLOC_005280	LincRNAs identified by Cabili et al	241	chr6	+	38622224	38631831	ACTCCACCCTTGCACTGCCTAGCTCTGGATTTATTTTATGTGTTGTTCCTGAAAGCACTC	intergenic							9.52826	10.5893
ASHGA5P035920	0.0086181	0.0443672	2.08644	down	noncoding	ENST00000416229	AC007040.6	GENCODE	477	chr2	+	71221639	71229884	CTCTGACAAGCTGGCTCCTCTCCTCAGAAAAAAGAAAGAAACAAAGAGAAGAGGATGACA	natural antisense	NM_144582	TEX261	protein TEX261	-	71213067	71222001	5.10297	6.16401
ASHGA5P047778	0.0101363	0.0471188	2.08594	down	noncoding	ENST00000445868	RP11-462G8.2	GENCODE	760	chr10	+	132897967	132903660	ACTCCACCCTTCACTGTGCTGCTAGTGTTCTCTGGACCACTCCTATTTCATCACTATTAT	intronic antisense	NM_174937	TCERG1L	transcription elongation regulator 1-like protein	-	132890654	133109984	8.29628	9.35698
ASHGA5P043756	0.000438216	0.0184222	2.08561	down	noncoding	ENST00000428678	UPK3BP1	pseudogene	509	chr7	+	76633978	76635091	ACAGAGCTGGTGCCCTACACACCACAGATAACAGCTTGGGACCTGGAAGGGAAGGTCACA								3.85932	4.91979
ASHGA5P023658	0.00349089	0.0362019	2.08526	down	noncoding	HMlincRNA1314+	HMlincRNA1314	LincRNAs identified by Khalil et al	18405	chr3	+	65301806	65320211	TCCCTCTGACAACCAGCCATCCTTCATCAATTTCCATAGTAATCATGGCTATTTATTCAG	intergenic							4.5268	5.58703
ASHGA5P043399	0.00360431	0.0365626	2.08508	down	noncoding	ENST00000481651	RP11-61L23.2	GENCODE	2106	chr7	-	143509060	143534026	CCCCGCCTCCAGGACGGCCCCTACCTCCGAGACCGCCCCGCCTCCGGGACCGCCCCGCCC	intergenic							9.08891	10.149
ASHGA5P037933	0.00459493	0.0388495	2.08417	down	noncoding	ENST00000564479	RP11-275F13.1	GENCODE	812	chr1	+	51795325	51800996	GAGAACTTCATGGACTGCTTTCACCTGTGCCATTGTCAACTTAAGAAGGCCCTTAATATG	intronic antisense	NM_001144832	TTC39A	tetratricopeptide repeat protein 39A isoform 1	-	51752929	51810785	3.91968	4.97916
ASHGA5P047840	0.00323322	0.0360585	2.08409	down	noncoding	ENST00000529323	RRM1-AS1	GENCODE	346	chr11	-	4158345	4159487	GTGAGAATACTAGACATTCCACACCAATATTTAAAATACATTCCTGTCCAGCCGCCCCGT	natural antisense	NM_001033	RRM1	ribonucleoside-diphosphate reductase large subunit	+	4115923	4160106	3.47595	4.53537
ASHGA5P033089	0.0172688	0.0611718	2.08374	down	noncoding	TCONS_00028190	XLOC_013543	LincRNAs identified by Cabili et al	2018	chr20	+	46523122	46525630	TGCTGTTCATGTCTGAGGGTTGTAGAGCTGGAGACCCAGGGAGAAGCCCGTACTACAGCT	intergenic							5.59001	6.64919
ASHGA5P000545	0.000563667	0.0204629	2.08285	down	noncoding	chr9:110109500-110126925-	chr9:110109500-110126925	LincRNAs identified by Khalil et al	17425	chr9	-	111069679	111087104	CCATCCCCCTTTCGCCTCTTTTTCCGTAAGCATTAATTGAATAATTATACTATCCCAGAC	intergenic							8.68719	9.74575
ASHGA5P045204	0.00237778	0.0326752	2.08241	down	noncoding	NR_003051	RMRP	RefSeq	277	chr9	-	35657747	35658015	TGTATCCTAGGCTACACACTGAGGACTCTGTTCCTCCCCTTTCCGCCTAGGGGAAAGTCC	bidirectional	NM_001195200	CCDC107	coiled-coil domain-containing protein 107 isoform B precursor	+	35658286	35661500	9.87008	10.9283
ASHGA5P045204	0.00237778	0.0326752	2.08241	down	noncoding	NR_003051	RMRP	RefSeq	277	chr9	-	35657747	35658015	TGTATCCTAGGCTACACACTGAGGACTCTGTTCCTCCCCTTTCCGCCTAGGGGAAAGTCC	bidirectional	NM_001195201	CCDC107	coiled-coil domain-containing protein 107 isoform C precursor	+	35658286	35661500	9.87008	10.9283
ASHGA5P045204	0.00237778	0.0326752	2.08241	down	noncoding	NR_003051	RMRP	RefSeq	277	chr9	-	35657747	35658015	TGTATCCTAGGCTACACACTGAGGACTCTGTTCCTCCCCTTTCCGCCTAGGGGAAAGTCC	bidirectional	NM_001195217	CCDC107	coiled-coil domain-containing protein 107 isoform D precursor	+	35658286	35661500	9.87008	10.9283
ASHGA5P045204	0.00237778	0.0326752	2.08241	down	noncoding	NR_003051	RMRP	RefSeq	277	chr9	-	35657747	35658015	TGTATCCTAGGCTACACACTGAGGACTCTGTTCCTCCCCTTTCCGCCTAGGGGAAAGTCC	bidirectional	NM_174923	CCDC107	coiled-coil domain-containing protein 107 isoform A precursor	+	35658286	35661500	9.87008	10.9283
ASHGA5P022749	0.00128854	0.027164	2.08223	down	noncoding	ENST00000562031	RP11-8P11.3	GENCODE	519	chr15	+	74060554	74061978	AAAGACCAAGCCACAGCCTCCTCAAGAAGTTTGAAGTCTGCATTGAACTCATTAATTTCC	intergenic							4.2256	5.28373
ASHGA5P042990	0.00296427	0.0353331	2.08214	down	noncoding	ENST00000440034	RP11-89N17.4	GENCODE	1005	chr7	-	33835079	33842768	AGTCAATTCTCTCCCTCAGTGCCCTCATGTGTATAAATTGCATATCATATGGCATTTTTT	intergenic							5.77456	6.83263
ASHGA5P047323	0.0019827	0.0309348	2.08174	down	noncoding	uc001ius.1	AX747507	UCSC_knowngene	1164	chr10	+	29745064	29746228	GCTGTGGGATAAAGAACTTCTGCTGAATGATGATTTGCAAAAGTATGTCTTCATTATAGT	intergenic							3.79301	4.8508
ASHGA5P036914	0.026158	0.0777808	2.08115	down	noncoding	TCONS_00025358	XLOC_012177	LincRNAs identified by Cabili et al	1210	chr17	+	33640547	33652439	CAAGAAGCTACCCTCTCCCCACCAGACAGAGCAGGATGAGAGTTCTATAATCCTCAATAG	intergenic							8.52972	9.5871
ASHGA5P045475	0.00156535	0.028696	2.07985	down	noncoding	ENST00000425370	RP11-123K19.1	GENCODE	506	chr9	-	129370556	129375978	GGCTGAAACATAAGTGCTCACCACAACACCCAGCACCTACCAGGCCTCTATACATATTTG	bidirectional	NM_001174146	LMX1B	LIM homeobox transcription factor 1-beta isoform 3	+	129376721	129463311	5.14196	6.19844
ASHGA5P045475	0.00156535	0.028696	2.07985	down	noncoding	ENST00000425370	RP11-123K19.1	GENCODE	506	chr9	-	129370556	129375978	GGCTGAAACATAAGTGCTCACCACAACACCCAGCACCTACCAGGCCTCTATACATATTTG	bidirectional	NM_001174147	LMX1B	LIM homeobox transcription factor 1-beta isoform 2	+	129376721	129463311	5.14196	6.19844
ASHGA5P045475	0.00156535	0.028696	2.07985	down	noncoding	ENST00000425370	RP11-123K19.1	GENCODE	506	chr9	-	129370556	129375978	GGCTGAAACATAAGTGCTCACCACAACACCCAGCACCTACCAGGCCTCTATACATATTTG	bidirectional	NM_002316	LMX1B	LIM homeobox transcription factor 1-beta isoform 1	+	129376721	129463311	5.14196	6.19844
ASHGA5P030175	0.00859269	0.0443672	2.07899	down	noncoding	TCONS_00009133	XLOC_004108	LincRNAs identified by Cabili et al	598	chr4	-	145122622	145132014	ATCCTTCCCCATGGTACAGCCCCAGAAAGATAAAAGTCTCAGAATAAAACACTGTACATG	intergenic							5.42925	6.48513
ASHGA5P026615	4.96125e-05	0.00975305	2.07865	down	noncoding	ENST00000546065	AP000593.7	GENCODE	578	chr11	+	72013182	72014009	GCAAGTCTGTGTGATGCCCGTGTCCCTTTGATTTACTTTTCTTCAAAATGAATATATTTT	natural antisense	NM_001258392	CLPB	caseinolytic peptidase B protein homolog isoform 2	-	72003469	72145724	5.3558	6.41145
ASHGA5P026615	4.96125e-05	0.00975305	2.07865	down	noncoding	ENST00000546065	AP000593.7	GENCODE	578	chr11	+	72013182	72014009	GCAAGTCTGTGTGATGCCCGTGTCCCTTTGATTTACTTTTCTTCAAAATGAATATATTTT	natural antisense	NM_001258393	CLPB	caseinolytic peptidase B protein homolog isoform 3	-	72003469	72145724	5.3558	6.41145
ASHGA5P026615	4.96125e-05	0.00975305	2.07865	down	noncoding	ENST00000546065	AP000593.7	GENCODE	578	chr11	+	72013182	72014009	GCAAGTCTGTGTGATGCCCGTGTCCCTTTGATTTACTTTTCTTCAAAATGAATATATTTT	natural antisense	NM_001258394	CLPB	caseinolytic peptidase B protein homolog isoform 4	-	72003469	72145724	5.3558	6.41145
ASHGA5P026615	4.96125e-05	0.00975305	2.07865	down	noncoding	ENST00000546065	AP000593.7	GENCODE	578	chr11	+	72013182	72014009	GCAAGTCTGTGTGATGCCCGTGTCCCTTTGATTTACTTTTCTTCAAAATGAATATATTTT	natural antisense	NM_030813	CLPB	caseinolytic peptidase B protein homolog isoform 1	-	72003469	72145724	5.3558	6.41145
ASHGA5P040117	0.00865156	0.0443936	2.07511	down	noncoding	ENST00000507332	RP11-614F17.2	GENCODE	401	chr4	+	132694719	132712637	CTTGCAGTCATGCCTTCATAACCACTTTTCAATTAATCCTGCTTAATTCAGAGAATGTAT	intergenic							2.98255	4.03574
ASHGA5P022109	0.00489408	0.0391245	2.07456	down	noncoding	ENST00000549360	CTD-2251F13.1	GENCODE	768	chr14	-	30441874	30766223	CCAGCCAGGCTTCCTGTACAGCTTGTGGAACTACTAACCAATATAATTAGCCAATTAACA	intron sense-overlapping	ENST00000549503	PRKD1	protein kinase D1 [Source:HGNC Symbol;Acc:9407]	-	30133017	30661104	5.70627	6.75907
ASHGA5P044082	0.00104813	0.0258525	2.0741	down	noncoding	NR_040040	LOC100287015	RefSeq	2408	chr8	-	6261076	6264069	TCCTGGGAGTAAGGAGGACGACGGCCCCTAACCCCTGAATTAGCCTTCTATTTCCATTAG	bidirectional	NM_001172574	MCPH1	microcephalin isoform 2	+	6264112	6304940	6.14459	7.19707
ASHGA5P044082	0.00104813	0.0258525	2.0741	down	noncoding	NR_040040	LOC100287015	RefSeq	2408	chr8	-	6261076	6264069	TCCTGGGAGTAAGGAGGACGACGGCCCCTAACCCCTGAATTAGCCTTCTATTTCCATTAG	bidirectional	NM_001172575	MCPH1	microcephalin isoform 3	+	6264112	6304940	6.14459	7.19707
ASHGA5P044082	0.00104813	0.0258525	2.0741	down	noncoding	NR_040040	LOC100287015	RefSeq	2408	chr8	-	6261076	6264069	TCCTGGGAGTAAGGAGGACGACGGCCCCTAACCCCTGAATTAGCCTTCTATTTCCATTAG	bidirectional	NM_024596	MCPH1	microcephalin isoform 1	+	6264112	6501140	6.14459	7.19707
ASHGA5P033741	0.00554036	0.0401563	2.07153	down	noncoding	ENST00000584109	RP11-881L2.1	GENCODE	534	chr18	+	9587383	9590180	CAGTAACAAGTCATTGTATCGGACCTAACTAGAACTCTGATACCCATTATTATTATGCAT	intronic antisense	NM_001042388	PPP4R1	serine/threonine-protein phosphatase 4 regulatory subunit 1 isoform a	-	9546788	9614605	10.4	11.4507
ASHGA5P033741	0.00554036	0.0401563	2.07153	down	noncoding	ENST00000584109	RP11-881L2.1	GENCODE	534	chr18	+	9587383	9590180	CAGTAACAAGTCATTGTATCGGACCTAACTAGAACTCTGATACCCATTATTATTATGCAT	intronic antisense	NM_005134	PPP4R1	serine/threonine-protein phosphatase 4 regulatory subunit 1 isoform b	-	9546788	9614605	10.4	11.4507
ASHGA5P036398	0.000146759	0.0133081	2.07142	down	noncoding	TCONS_00026336	XLOC_012683	LincRNAs identified by Cabili et al	1359	chr18	+	53497614	53506331	AAGGCTGTCACTGTCAATTGCATGGCTCCCTCACTATGCATTCCTTCTATCAATTTACGA	intergenic							4.44506	5.49568
ASHGA5P057026	0.0021197	0.0314014	2.07133	down	noncoding	TCONS_00012067	XLOC_005595	LincRNAs identified by Cabili et al	2912	chr6	-	6694899	6700867	AACTGCTCTGCATCTGCCTGGATGTCTGCCAAGATCTTCTTCTTTCCACCAATGACCCCT	intergenic							4.22817	5.27872
ASHGA5P023797	0.0392081	0.10096	2.07077	down	noncoding	HMlincRNA457-	HMlincRNA457	LincRNAs identified by Khalil et al	9550	chr3	-	25863830	25873380	CCTCCTCTGAACCGTTGAGAGACTTGAGAAGAACAATGCACCAAGCACAGTCTGAAAATT	intergenic							5.06194	6.11211
ASHGA5P044629	0.000444548	0.0185419	2.07016	down	noncoding	NR_045217	LOC100652791	RefSeq	1137	chr8	+	6693075	6699975	TTTAGGTCCCCGTCCCTCTCTGTAACCAATAACCAATGCCATATAAATGGAAAAGTATAA	natural antisense	NM_207411	XKR5	XK-related protein 5	-	6666040	6693166	7.02748	8.07723
ASHGA5P038696	0.0312473	0.0870919	2.06968	down	noncoding	ENST00000448015	RP11-460I13.2	GENCODE	491	chr1	-	28265385	28286704	AAATGATCACAGTGCACTATATTCTGCCACCACCTACCAGCATGGCCTTGGAGATATATA	natural antisense	NM_001009568	SMPDL3B	acid sphingomyelinase-like phosphodiesterase 3b isoform 2 precursor	+	28261503	28282991	4.69452	5.74393
ASHGA5P038696	0.0312473	0.0870919	2.06968	down	noncoding	ENST00000448015	RP11-460I13.2	GENCODE	491	chr1	-	28265385	28286704	AAATGATCACAGTGCACTATATTCTGCCACCACCTACCAGCATGGCCTTGGAGATATATA	natural antisense	NM_014474	SMPDL3B	acid sphingomyelinase-like phosphodiesterase 3b isoform 1 precursor	+	28261503	28285663	4.69452	5.74393
ASHGA5P038696	0.0312473	0.0870919	2.06968	down	noncoding	ENST00000448015	RP11-460I13.2	GENCODE	491	chr1	-	28265385	28286704	AAATGATCACAGTGCACTATATTCTGCCACCACCTACCAGCATGGCCTTGGAGATATATA	natural antisense	NM_018053	XKR8	XK-related protein 8	+	28286503	28294604	4.69452	5.74393
ASHGA5P048610	0.0227477	0.0718183	2.06855	down	noncoding	NR_027410	GOLGA8B	RefSeq	6519	chr15	-	34817483	34875771	TCCATGTGCAGTCTCATCTCTTATAGTCAGCAACAGGTATCCACGGGGAGGGCCCTACAT	exon sense-overlapping	NM_001023567	GOLGA8B	Golgin subfamily A member 8B	-	34817483	34828222	4.18143	5.23005
ASHGA5P033860	0.00890459	0.0449635	2.06743	down	noncoding	ENST00000579506	RP11-202D1.3	GENCODE	384	chr18	+	51094840	51104092	GCACAGTGATTGACAATCTCCTTTCTCCTCAACTAGAATGTCATTTCCTTTTTTAAAACT	intergenic							3.09429	4.14213
ASHGA5P018475	0.00209807	0.0314014	2.06574	down	noncoding	ENST00000453998	RP11-399F4.4	GENCODE	783	chr9	-	43027747	43032877	TAGCAAGAAGGTGTGGGGCTGGGTATGGTCACTCCTGCTGGATGTCTAGAAGGTGAAAAC	intergenic							3.33364	4.38029
ASHGA5P054743	0.000400125	0.0175839	2.06492	down	noncoding	uc001aae.4	WASH7P	UCSC_knowngene	2412	chr1	-	14361	19759	TGCCTTCTCATCCCTGCGCACCACACAGGCTCGCTCGTGCCCGGTGAGTGCTGAGGCTGC	intergenic							8.67342	9.71951
ASHGA5P047586	0.00214896	0.0314014	2.06483	down	noncoding	ENST00000412362	RP11-236B18.2	GENCODE	380	chr10	+	92754376	92766147	TCTTTGCTTCTCACTTCCTGTGCCTTCTCCCAGAGAAACGGAGCTTTTGGAATTCTTTCA	intergenic							4.8873	5.93333
ASHGA5P041941	0.00912821	0.0453509	2.06346	down	noncoding	TCONS_00020949	XLOC_010216	LincRNAs identified by Cabili et al	628	chr12	-	119392576	119393895	GAGGAAGACTTTGACATTTAAAAAATTCTCCATCTCTCTCCAAGTGTCCCATCCCCAACT	intergenic							5.03002	6.07508
ASHGA5P000459	0.011879	0.0503889	2.0627	down	noncoding	chr5:49667825-49697900-	chr5:49667825-49697900	LincRNAs identified by Khalil et al	30075	chr5	-	49632068	49662143	GGCATCCAGTCTTTTTATTTTTAAAGCCCATGGTTTCTTGCTCCTGCTGGTGTTAGAATA	intergenic							3.53505	4.57958
ASHGA5P043305	0.00213067	0.0314014	2.06067	down	noncoding	TCONS_00019593	XLOC_009395	LincRNAs identified by Cabili et al	266	chr11	-	23825999	23829778	AGGAATGTAGGAAGGAAGGACATCAGGCTCTGAACATCCATCCATGTAAAACATTGAATA	intergenic							7.12839	8.1715
ASHGA5P038091	0.00985203	0.0465913	2.06016	down	noncoding	NR_033378	LOC100288428	RefSeq	2147	chr3	-	8262833	8543344	AGAATCATCCAGCTCTTTTCTCCTCTTCAAAGTTGCCCTTCTTTTCTCTGAACATTAATG	bidirectional	NM_014583	LMCD1	LIM and cysteine-rich domains protein 1	+	8543510	8609806	5.34647	6.38923
ASHGA5P020499	0.000179864	0.0138211	2.05878	down	noncoding	ENST00000514788	CTD-2044J15.1	GENCODE	381	chr5	-	6705262	6706385	CCATCTCAGGGCCAGGCTCTCCTTCCCCCATGGTAAGAAGGTGAAGACTTGGAGATTGGT	intergenic							6.84537	7.88716
ASHGA5P058391	0.00191995	0.0307364	2.05844	down	noncoding	uc002nqa.3	LOC400680	UCSC_knowngene	3625	chr19	+	21666175	21682696	CAGCACCTAGGGACCTTGTGACATATATCTGCACCCATGACCTAGAAGATGTGACATTTA	intergenic							4.43172	5.47327
ASHGA5P022996	0.00963108	0.0463356	2.05821	down	noncoding	ENST00000567363	RP11-812E19.3	GENCODE	469	chr16	-	33768311	33775415	CACCACACCCATTTTATGTTTCTTATACAGGCTTTCTTCTATGAAATGCTATGTCATGAA	intergenic							3.45434	4.49573
ASHGA5P049362	9.28258e-05	0.0119627	2.05519	down	noncoding	TCONS_00021721	XLOC_010305	LincRNAs identified by Cabili et al	1765	chr13	+	23500701	23509087	TGGAATCCCAGCTCAGCCCCTGCACACCTGATTGCCCGGAGAAATGCCTTATTCCTGACA	intergenic							7.37197	8.41124
ASHGA5P056536	0.0175013	0.0616892	2.05437	down	noncoding	TCONS_00005989	XLOC_002616	LincRNAs identified by Cabili et al	347	chr3	+	39219383	39223013	GGGAATTCTCAGCAGCACTTTTTCGCCGCCACCTCCAACCAATCGGACTGGCTCTTCTGT	intergenic							6.44863	7.48732
ASHGA5P022506	0.00541266	0.0400885	2.05275	down	noncoding	ENST00000558149	DNM1P44	pseudogene	522	chr15	-	84953687	84956429	GCCTGCCATGACCACGGAGTTCATCATCTCGGAGCCACTGGCCAATATGTACTCGCGTGG								4.39382	5.43138
ASHGA5P057399	0.00119196	0.0267014	2.05143	down	noncoding	TCONS_00016774	XLOC_007703	LincRNAs identified by Cabili et al	271	chr9	-	65764392	65777743	TGGAAGAAGGCTTGGTCCCCTTGGCTTGGTGAGATCATGAAATAAAAACATCAGTAGGAG	intergenic							8.20681	9.24343
ASHGA5P032741	0.00152037	0.0285017	2.05096	down	noncoding	ENST00000570974	RP5-1029F21.4	GENCODE	478	chr17	+	426379	443816	AAGGCCTGTACTCTCTGCCACTGCCTGCTTCTTTGGGAAAGCCTTCTGTAATCCTATCAG	intronic antisense	NM_001128159	VPS53	vacuolar protein sorting-associated protein 53 homolog isoform 1	-	411907	618096	5.35051	6.38681
ASHGA5P032741	0.00152037	0.0285017	2.05096	down	noncoding	ENST00000570974	RP5-1029F21.4	GENCODE	478	chr17	+	426379	443816	AAGGCCTGTACTCTCTGCCACTGCCTGCTTCTTTGGGAAAGCCTTCTGTAATCCTATCAG	intronic antisense	NM_018289	VPS53	vacuolar protein sorting-associated protein 53 homolog isoform 2	-	435532	618096	5.35051	6.38681
ASHGA5P022628	0.0115858	0.0497823	2.04913	down	noncoding	ENST00000559979	RP11-17L5.4	GENCODE	558	chr15	-	79529047	79576183	AGTCATTCAGGTTTTCCAGGAGAGAATCCACTTTTTGTTTTATCTGGGTCAACTCCTTCA	intronic antisense	NM_001146341	ANKRD34C	ankyrin repeat domain-containing protein 34C	+	79575145	79590581	3.89812	4.93313
ASHGA5P048451	0.0100915	0.0470683	2.04881	down	noncoding	TCONS_00013731	XLOC_006381	LincRNAs identified by Cabili et al	439	chr7	-	25594359	25607592	GCGCAGAGAGGAGCCTGCCTTCCTCTCCACATCTTAGTTTATGGGACCAGTTAACATGCT	intergenic							4.56127	5.59606
ASHGA5P021539	0.00177723	0.0295805	2.04845	down	noncoding	ENST00000534398	RP11-429J17.6	GENCODE	582	chr8	+	144821565	144824305	GCCCCCACAGGGACACCTGGTCGCCATCACATGGACACGCTATTTTTGCACTCGAGGCTA	intergenic							5.28369	6.31822
ASHGA5P056576	0.00794715	0.0435209	2.04838	down	noncoding	TCONS_00006219	XLOC_002811	LincRNAs identified by Cabili et al	531	chr3	+	128774333	128777479	AAGCAAACGGCTGGCTCCTGTGGGTTCTCTTATTCCAGCCCTCCTGAGGTAGATCAGCAG	intergenic							6.79433	7.82881
ASHGA5P035955	0.0299265	0.0847259	2.04783	down	noncoding	ENST00000451622	AC007099.1	GENCODE	1101	chr2	+	75767864	75769832	AGCAATAAAAACAGAAGACACCAACACCAGCAGTCCAGAGACCTCCAGTATAACATAAAG	intronic antisense	NM_001135032	FAM176A	protein FAM176A	-	75719443	75788092	3.78093	4.81502
ASHGA5P035955	0.0299265	0.0847259	2.04783	down	noncoding	ENST00000451622	AC007099.1	GENCODE	1101	chr2	+	75767864	75769832	AGCAATAAAAACAGAAGACACCAACACCAGCAGTCCAGAGACCTCCAGTATAACATAAAG	intronic antisense	NM_032181	FAM176A	protein FAM176A	-	75719443	75796848	3.78093	4.81502
ASHGA5P018006	0.00305676	0.0355889	2.04647	down	noncoding	ENST00000543603	AP001053.11	GENCODE	553	chr21	-	45228910	45230242	TAAAACCAGCCCTGTGTAGAGCCATGCCAGGCAGGAAAATGGGCACCTCTAGTGACCCAG	intergenic							5.3544	6.38753
ASHGA5P047693	0.0257889	0.0770076	2.04586	down	noncoding	DB341353		LincRNAs identified by Khalil et al	536	chr2	+	237515990	237518003	TCAGGCCCTGGCTTCCTGGGCCCTTTTCTAAAGAGGACCCTTCCTTCGTCCCTCTAAGAT	intergenic							5.1914	6.22411
ASHGA5P044096	0.0302613	0.0854637	2.04474	down	noncoding	ENST00000527080	USP17L8	pseudogene	1593	chr8	-	7829182	7830775	TCAAAATACAAGTGTGGGATGAAAAACCACCATCCTGAACAGCAAAGCTCCCTGCTAAAC								3.56962	4.60153
ASHGA5P054502	0.00162936	0.0291734	2.04412	down	noncoding	TCONS_00010774	XLOC_004517	LincRNAs identified by Cabili et al	592	chr5	+	115292238	115294320	AATCCCACCCAGGAAAAGAAGACAGCAAGAAGAAGCCACTTTGAGCCCCTATGATTTCAT	intergenic							7.67181	8.7033
ASHGA5P009515	0.000634656	0.0213415	2.04232	down	noncoding	ENST00000388970	AFG3L1P	GENCODE	1466	chr16	+	90044101	90066961	GGCTTCCCTGGTGTCCATCATACCCCAGGGCAAGGGGCTCCGCTACGCACAGTACCTGCC	intergenic							4.77801	5.80822
ASHGA5P028640	0.00345786	0.0361534	2.04187	down	noncoding	ENST00000418607	BX004987.7	GENCODE	964	chr1	-	143527404	143533272	CCACAGTGGATTAGTGGATATTACAAAACCTCTGGTCCCACCTCATTAAGATGGAAAAAA	intergenic							5.09077	6.12066
ASHGA5P033332	0.0192809	0.0654598	2.04012	down	noncoding	uc002jim.3	BX647864	UCSC_knowngene	1045	chr17	+	68047417	68064236	CCCTCCACAGAGATATCAATTTGCATAAGAGGAGAAAATAAATTCATTTAAACCCCATTC	intergenic							3.1983	4.22696
ASHGA5P037711	0.00538596	0.0400885	2.04	down	noncoding	uc003azp.1	AK057177	UCSC_knowngene	2229	chr22	-	41605125	41613360	CCAGGCTCCTCTGTGGATTTACAAATGATGATATTTTAACATGGTTCAAATAGAATACTG	natural antisense	NM_031488	L3MBTL2	lethal(3)malignant brain tumor-like protein 2	+	41601312	41627275	4.40151	5.43009
ASHGA5P020083	0.00387416	0.0375242	2.03942	down	noncoding	ENST00000507929	RP11-267L5.1	GENCODE	697	chr8	+	115294300	115307853	ACGCCGAGCTTCAGGTAACTCTCACAGTGGAAGGAAACGACGAGGCTGAATCCTGTTGGA	intergenic							4.02205	5.0502
ASHGA5P030516	0.0230274	0.0722785	2.03887	down	noncoding	ENST00000560705	RP11-718O11.1	GENCODE	861	chr15	+	45997275	46141083	TTCCTTTGAGCTCCTCCACCCTCCAAAGTCAAGTCTTAACAAAACAACATATTCCCCATG	intergenic							6.82634	7.85411
ASHGA5P032067	0.00279131	0.0344152	2.03864	down	noncoding	NR_028076	SCARF1	RefSeq	3864	chr17	-	1537151	1549041	TCAAGGCCCTATTTGCACCTGAGCTTCACTGCTGAGGAGTGGCCAGTTGGGTCCTTGAGT	exon sense-overlapping	NM_003693	SCARF1	scavenger receptor class F member 1 isoform 1 precursor	-	1537151	1549041	4.70404	5.73165
ASHGA5P032067	0.00279131	0.0344152	2.03864	down	noncoding	NR_028076	SCARF1	RefSeq	3864	chr17	-	1537151	1549041	TCAAGGCCCTATTTGCACCTGAGCTTCACTGCTGAGGAGTGGCCAGTTGGGTCCTTGAGT	exon sense-overlapping	NM_145350	SCARF1	scavenger receptor class F member 1 isoform 3 precursor	-	1537151	1549041	4.70404	5.73165
ASHGA5P032067	0.00279131	0.0344152	2.03864	down	noncoding	NR_028076	SCARF1	RefSeq	3864	chr17	-	1537151	1549041	TCAAGGCCCTATTTGCACCTGAGCTTCACTGCTGAGGAGTGGCCAGTTGGGTCCTTGAGT	exon sense-overlapping	NM_145352	SCARF1	scavenger receptor class F member 1 isoform 5 precursor	-	1537151	1549041	4.70404	5.73165
ASHGA5P022388	0.0107667	0.0483895	2.03811	down	noncoding	ENST00000555928	MEG3	GENCODE	720	chr14	+	101297817	101327363	TCTACTCCGTGGAAGCACGCTCACAAAGTTCCTGACCTGGCCATCCCGGGGTGCCCTTGA	intergenic							3.38346	4.41068
ASHGA5P035567	0.02529	0.0764506	2.0371	down	noncoding	ENST00000421907	AC007557.2	GENCODE	430	chr2	-	217731054	217732536	CCTCCCCACCAAAATAATAATAATAATAAGGCTACACAGTATCTGGAATTTCTTGCTCAT	intergenic							6.48933	7.51585
ASHGA5P042349	0.0200972	0.0671435	2.03544	down	noncoding	ENST00000442150	MDC1-AS1	GENCODE	738	chr6	+	30670843	30680961	TTGTATCATTGTCCCTCTCCTTCACTAAAGGCTGATCCTTTTCAAGCTGGATTTCAGTTA	natural antisense	NM_014641	MDC1	mediator of DNA damage checkpoint protein 1	-	30667583	30685458	5.2592	6.28454
ASHGA5P028223	0.00459721	0.0388495	2.03471	down	noncoding	NR_027035	LOC144486	RefSeq	2568	chr12	+	94853778	94856344	TTGCTCCTGCCATACATATACACATGCACATACATACTTTTTCTGCTATATGTTACACAT	bidirectional	NM_001042399	CCDC41	coiled-coil domain-containing protein 41	-	94702055	94853764	3.79218	4.817
ASHGA5P028223	0.00459721	0.0388495	2.03471	down	noncoding	NR_027035	LOC144486	RefSeq	2568	chr12	+	94853778	94856344	TTGCTCCTGCCATACATATACACATGCACATACATACTTTTTCTGCTATATGTTACACAT	bidirectional	NM_016122	CCDC41	coiled-coil domain-containing protein 41	-	94702055	94853764	3.79218	4.817
ASHGA5P036219	0.00229827	0.0321583	2.03176	down	noncoding	ENST00000414885	AC019181.2	GENCODE	567	chr2	+	165697258	165705844	AAGGTCCACCCCATGAGAGACTTGCAGCAGAATTAATGACACTGTATATTTTCCTCTACT	intronic antisense	NM_014900	COBLL1	cordon-bleu protein-like 1	-	165541257	165697928	6.02027	7.04299
ASHGA5P049550	0.00744173	0.0428256	2.03002	down	noncoding	ENST00000445752	CCDC144B	GENCODE	2197	chr17	-	18506601	18528930	ATGAAGAGCATGACAGGTAAGCCTATAGCAGCGTTTAACAGGAGACAATTGGTCAAGCGT	intergenic							3.72651	4.74801
ASHGA5P031342	0.0103639	0.047554	2.02925	down	noncoding	ENST00000568136	RP11-481E4.2	GENCODE	543	chr16	-	82529597	82544501	GATATCACATGGAACTCTTCTCTCCCACTCTGTCACTTGACTGCCTTCTTGCCTGATGAG	intergenic							6.46536	7.4863
ASHGA5P037517	0.000923133	0.0253095	2.02922	down	noncoding	ENST00000445242	BX322557.13	GENCODE	379	chr21	+	46756621	46758580	TCTTTAATGGCTCACCCTGGAGTTTTATCCCTCCTGGTAATAATTTCATGACCAACACAA	intergenic							4.36946	5.39038
ASHGA5P054653	0.0021785	0.0315353	2.02875	down	noncoding	uc001lsk.1	AK126635	UCSC_knowngene	1828	chr11	-	856879	858707	GTGAGCGGAGGTCCGTGGGAGCCTGGGGTGCGTGGGAACTGGGTGAGCAGGGTGTGTGAG	intronic antisense	NM_001025234	TSPAN4	tetraspanin-4 isoform a	+	844080	867116	3.32842	4.34901
ASHGA5P054653	0.0021785	0.0315353	2.02875	down	noncoding	uc001lsk.1	AK126635	UCSC_knowngene	1828	chr11	-	856879	858707	GTGAGCGGAGGTCCGTGGGAGCCTGGGGTGCGTGGGAACTGGGTGAGCAGGGTGTGTGAG	intronic antisense	NM_001025235	TSPAN4	tetraspanin-4 isoform a	+	842940	867116	3.32842	4.34901
ASHGA5P054653	0.0021785	0.0315353	2.02875	down	noncoding	uc001lsk.1	AK126635	UCSC_knowngene	1828	chr11	-	856879	858707	GTGAGCGGAGGTCCGTGGGAGCCTGGGGTGCGTGGGAACTGGGTGAGCAGGGTGTGTGAG	intronic antisense	NM_001025236	TSPAN4	tetraspanin-4 isoform a	+	842940	867116	3.32842	4.34901
ASHGA5P054653	0.0021785	0.0315353	2.02875	down	noncoding	uc001lsk.1	AK126635	UCSC_knowngene	1828	chr11	-	856879	858707	GTGAGCGGAGGTCCGTGGGAGCCTGGGGTGCGTGGGAACTGGGTGAGCAGGGTGTGTGAG	intronic antisense	NM_001025237	TSPAN4	tetraspanin-4 isoform a	+	844445	867116	3.32842	4.34901
ASHGA5P054653	0.0021785	0.0315353	2.02875	down	noncoding	uc001lsk.1	AK126635	UCSC_knowngene	1828	chr11	-	856879	858707	GTGAGCGGAGGTCCGTGGGAGCCTGGGGTGCGTGGGAACTGGGTGAGCAGGGTGTGTGAG	intronic antisense	NM_001025238	TSPAN4	tetraspanin-4 isoform a	+	842823	867116	3.32842	4.34901
ASHGA5P054653	0.0021785	0.0315353	2.02875	down	noncoding	uc001lsk.1	AK126635	UCSC_knowngene	1828	chr11	-	856879	858707	GTGAGCGGAGGTCCGTGGGAGCCTGGGGTGCGTGGGAACTGGGTGAGCAGGGTGTGTGAG	intronic antisense	NM_001025239	TSPAN4	tetraspanin-4 isoform b	+	842823	867116	3.32842	4.34901
ASHGA5P054653	0.0021785	0.0315353	2.02875	down	noncoding	uc001lsk.1	AK126635	UCSC_knowngene	1828	chr11	-	856879	858707	GTGAGCGGAGGTCCGTGGGAGCCTGGGGTGCGTGGGAACTGGGTGAGCAGGGTGTGTGAG	intronic antisense	NM_003271	TSPAN4	tetraspanin-4 isoform a	+	842823	867116	3.32842	4.34901
ASHGA5P041600	0.0493834	0.116962	2.02862	down	noncoding	TCONS_00014806	XLOC_006882	LincRNAs identified by Cabili et al	221	chr8	+	101464411	101468508	TTTGGGGGATTTCCAGTGACAGTCCTACTCTCACTCCATCACATCGCTTCTAAAATCTGA	intergenic							5.07217	6.09267
ASHGA5P057202	0.0011633	0.0266156	2.02828	down	noncoding	TCONS_00014460	XLOC_006677	LincRNAs identified by Cabili et al	1855	chr7	-	157230889	157232826	TCCCTGGAGGTGATGGAGGTGCTCCCTGGAGGTGATGGAGGTGCTGCTGGAAGTGATGGT	intergenic							3.87671	4.89696
ASHGA5P056546	0.000207318	0.0142595	2.02707	down	noncoding	TCONS_00006033	XLOC_002674	LincRNAs identified by Cabili et al	751	chr3	+	58165850	58173195	CCCCATCCAGCAAGTCTTCAAGCTCCTTAGAAAAGGAATGGCTGCAGCATTTCTCAACTG	intergenic							3.59189	4.61128
ASHGA5P026339	0.000130228	0.0127748	2.02696	down	noncoding	ENST00000534342	CTD-2560E9.5	GENCODE	449	chr11	+	45275532	45276200	TGTGTCCACTGGCTCCCTCATCAACCACACAAAACAAAACAGAGACTACACAACAATCTA	natural antisense	NM_001247987	SYT13	synaptotagmin-13 isoform 2	-	45261852	45307884	5.18642	6.20574
ASHGA5P026339	0.000130228	0.0127748	2.02696	down	noncoding	ENST00000534342	CTD-2560E9.5	GENCODE	449	chr11	+	45275532	45276200	TGTGTCCACTGGCTCCCTCATCAACCACACAAAACAAAACAGAGACTACACAACAATCTA	natural antisense	NM_020826	SYT13	synaptotagmin-13 isoform 1	-	45261852	45307884	5.18642	6.20574
ASHGA5P035256	0.00556491	0.0401563	2.02673	down	noncoding	ENST00000417844	AC068542.1	GENCODE	665	chr2	-	115586008	115591125	GCTCACTCCTTCTGAGCTGTCCCTATTTATTTATTTATTTTTGGTCTGATGGCTAAATAA	intronic antisense	NM_001178036	DPP10	inactive dipeptidyl peptidase 10 isoform a	+	115219179	116602326	3.92056	4.93972
ASHGA5P035256	0.00556491	0.0401563	2.02673	down	noncoding	ENST00000417844	AC068542.1	GENCODE	665	chr2	-	115586008	115591125	GCTCACTCCTTCTGAGCTGTCCCTATTTATTTATTTATTTTTGGTCTGATGGCTAAATAA	intronic antisense	NM_020868	DPP10	inactive dipeptidyl peptidase 10 isoform long	+	115199898	116602326	3.92056	4.93972
ASHGA5P027486	0.018803	0.0643586	2.02561	down	noncoding	ENST00000552451	RP11-511B23.2	GENCODE	653	chr12	-	93521439	93532867	AAACATTCACGCAGCACACACTTTAAAAACACTAAAGCTTGTCTCCGCCAGGTGGCTAAG	intergenic							3.88722	4.90558
ASHGA5P032879	0.00147774	0.0283626	2.02517	down	noncoding	NR_027167	C17orf76-AS1	RefSeq	1015	chr17	+	16342300	16345340	TTAGTTGACCGTAACTGCCAGAGCCCTGCCCTGAATTCCTGTCCTTACTCCCTCTTTAAG	natural antisense	NM_001113567	FAM211A	leucine-rich repeat-containing protein FAM211A isoform 1	-	16345318	16395505	6.64542	7.66347
ASHGA5P032879	0.00147774	0.0283626	2.02517	down	noncoding	NR_027167	C17orf76-AS1	RefSeq	1015	chr17	+	16342300	16345340	TTAGTTGACCGTAACTGCCAGAGCCCTGCCCTGAATTCCTGTCCTTACTCCCTCTTTAAG	natural antisense	NM_207387	FAM211A	leucine-rich repeat-containing protein FAM211A isoform 2	-	16345318	16395505	6.64542	7.66347
ASHGA5P043784	0.0116739	0.0498651	2.02445	down	noncoding	ENST00000435021	RP11-23I7.1	GENCODE	445	chr1	+	204632999	204633741	TCAGGAAACTCACTCCTTTGCTTACCCTCTCTCCACTTTTAAAAATAACGATATAAATGC	intronic antisense	NM_006338	LRRN2	leucine-rich repeat neuronal protein 2 precursor	-	204586302	204654481	5.66005	6.67758
ASHGA5P043784	0.0116739	0.0498651	2.02445	down	noncoding	ENST00000435021	RP11-23I7.1	GENCODE	445	chr1	+	204632999	204633741	TCAGGAAACTCACTCCTTTGCTTACCCTCTCTCCACTTTTAAAAATAACGATATAAATGC	intronic antisense	NM_201630	LRRN2	leucine-rich repeat neuronal protein 2 precursor	-	204586302	204654597	5.66005	6.67758
ASHGA5P019659	0.000661072	0.0218485	2.02415	down	noncoding	uc001mro.3	BDNF-AS1	UCSC_knowngene	1608	chr11	+	27528398	27699350	TGGGTCCGCACACCTGGAGATACTCTATTATAGCAAAGAAGAAAGATAATTTCATTGAGC	natural antisense	NM_001143805	BDNF	brain-derived neurotrophic factor isoform a preproprotein	-	27676441	27742326	3.37731	4.39462
ASHGA5P019659	0.000661072	0.0218485	2.02415	down	noncoding	uc001mro.3	BDNF-AS1	UCSC_knowngene	1608	chr11	+	27528398	27699350	TGGGTCCGCACACCTGGAGATACTCTATTATAGCAAAGAAGAAAGATAATTTCATTGAGC	natural antisense	NM_001143806	BDNF	brain-derived neurotrophic factor isoform a preproprotein	-	27676441	27742326	3.37731	4.39462
ASHGA5P019659	0.000661072	0.0218485	2.02415	down	noncoding	uc001mro.3	BDNF-AS1	UCSC_knowngene	1608	chr11	+	27528398	27699350	TGGGTCCGCACACCTGGAGATACTCTATTATAGCAAAGAAGAAAGATAATTTCATTGAGC	natural antisense	NM_001143807	BDNF	brain-derived neurotrophic factor isoform a preproprotein	-	27676441	27741294	3.37731	4.39462
ASHGA5P019659	0.000661072	0.0218485	2.02415	down	noncoding	uc001mro.3	BDNF-AS1	UCSC_knowngene	1608	chr11	+	27528398	27699350	TGGGTCCGCACACCTGGAGATACTCTATTATAGCAAAGAAGAAAGATAATTTCATTGAGC	natural antisense	NM_001143808	BDNF	brain-derived neurotrophic factor isoform a preproprotein	-	27676441	27722600	3.37731	4.39462
ASHGA5P019659	0.000661072	0.0218485	2.02415	down	noncoding	uc001mro.3	BDNF-AS1	UCSC_knowngene	1608	chr11	+	27528398	27699350	TGGGTCCGCACACCTGGAGATACTCTATTATAGCAAAGAAGAAAGATAATTTCATTGAGC	natural antisense	NM_001143809	BDNF	brain-derived neurotrophic factor isoform d preproprotein	-	27676441	27722600	3.37731	4.39462
ASHGA5P019659	0.000661072	0.0218485	2.02415	down	noncoding	uc001mro.3	BDNF-AS1	UCSC_knowngene	1608	chr11	+	27528398	27699350	TGGGTCCGCACACCTGGAGATACTCTATTATAGCAAAGAAGAAAGATAATTTCATTGAGC	natural antisense	NM_001143810	BDNF	brain-derived neurotrophic factor isoform e	-	27676441	27722600	3.37731	4.39462
ASHGA5P019659	0.000661072	0.0218485	2.02415	down	noncoding	uc001mro.3	BDNF-AS1	UCSC_knowngene	1608	chr11	+	27528398	27699350	TGGGTCCGCACACCTGGAGATACTCTATTATAGCAAAGAAGAAAGATAATTTCATTGAGC	natural antisense	NM_001143811	BDNF	brain-derived neurotrophic factor isoform a preproprotein	-	27676441	27722600	3.37731	4.39462
ASHGA5P019659	0.000661072	0.0218485	2.02415	down	noncoding	uc001mro.3	BDNF-AS1	UCSC_knowngene	1608	chr11	+	27528398	27699350	TGGGTCCGCACACCTGGAGATACTCTATTATAGCAAAGAAGAAAGATAATTTCATTGAGC	natural antisense	NM_001143812	BDNF	brain-derived neurotrophic factor isoform a preproprotein	-	27676441	27722447	3.37731	4.39462
ASHGA5P019659	0.000661072	0.0218485	2.02415	down	noncoding	uc001mro.3	BDNF-AS1	UCSC_knowngene	1608	chr11	+	27528398	27699350	TGGGTCCGCACACCTGGAGATACTCTATTATAGCAAAGAAGAAAGATAATTTCATTGAGC	natural antisense	NM_001143813	BDNF	brain-derived neurotrophic factor isoform a preproprotein	-	27676441	27722035	3.37731	4.39462
ASHGA5P019659	0.000661072	0.0218485	2.02415	down	noncoding	uc001mro.3	BDNF-AS1	UCSC_knowngene	1608	chr11	+	27528398	27699350	TGGGTCCGCACACCTGGAGATACTCTATTATAGCAAAGAAGAAAGATAATTTCATTGAGC	natural antisense	NM_001143814	BDNF	brain-derived neurotrophic factor isoform a preproprotein	-	27676441	27722035	3.37731	4.39462
[truncated: 46 more rows]
