# Supplementary material for: Age and poverty status alter the coding and noncoding transcriptome
Source: Aging (Albany NY). 2019 Feb 17;11(4):1189–203. doi: 10.18632/aging.101823 (PMC6402526; doi:10.18632/aging.101823)
Supplement: Supplementary Table 5 [file aging-11-101823-s006.xlsx]

## Sheet: Sheet1
Supplementary Table 5. Age-associated lncRNAs
lncRNA of interest to aging	lncRNAs changed with age in tendon
PANDA (Kumar et al., Nat Comm 2014)	(Peffers et al., Arth Res Ther 2015)
H19 (Monnier et al.,PNAS 2013)	RN7SK
UCA1 (Kumar et al., eLife 2014)	RN7SL2 RNA
lincRNA00475 (Melo et al., Oncogene 2016)	7SL
MIR31HG (Montes et al., Nat Comm 2015)	RNA28S5
ASncmtRNA-2 (Bianchessi et al., J Mol Cell Card. 2015)	RN7SKP255
Lincpint (Lai et al., PLoS ONE 2015)	RN7SKP203
Hottip (Lai et al., PLoS ONE 2015)	MALAT1
	DCN
Hallmarks of aging lncRNAs	RN7SL5P
(Grammatikakis et al, Aging 2014)	RNVU1-6
Xist	RP11-578O24.2
H19	AP003041.1
Airn	MKRN7P
ecCEBP	RPS4XP22
pRNA	RP11-346
PAPAS	RN7SKP234
PTENpg1-AS	CTD-2114 J12.1
TARID	AL021068.1
KCNQ1OT1	CTD-2083E4.4
NeST	RP3-326 L13.3
ANRASSF1	RP11-377D9.3
PINT	RP11-71E19.2
BORDERLINE	AC073636.1
MEG3	AC004510.3
GAS5	RP11-500B12.1
PANDA	AC007405.6
HOTAIR	RP11-399D6.2
AS Uchl1	RP11-966I7.1
LincRNA-p21	RP11-815 M8.1
AK028326	AC003090.1
ES1, ES2, ES3	RP11-79H23.3
linc-RoR	RP11-4 F5.2
Evx1as, Hoxb5/6as	RP5-1024G6.8
MALAT1	NKX2-1-AS1
ANRIL	RP3-326 L13.2
NcRNACCND1	RP11-464O2.2
SRA	AC091633.3
HEIH	RP11-711G10.1
HULC	SATB2-AS1
Gadd7	FEZF1-AS1
UCA1	SLC26A4-AS1
eRNAs	RP11-160A10.2
7SL	RP4-803 J11.2
17A	RP11-402 J6.1
TUC339	RP11-710C12.1
Tie-1as	XIST LncRNA
Linc-RoR	LINC00261
TERC	TSIX LncRNA
TERRA	LINC00461
AK141205	DLX6-AS1
	LINC00957
	ZNF667-AS1
	RP11-308 N19.1
	AF131215.9
	CTB-113P19.1
	AF131215.2
	MAFG-AS1
	AC020571.3
	AC012613.2
	RP11-923I11.1
	RP11-270 M14.5
	CTD-2540B15.9
	CTD-3049 M7.1
	RP5-1198O20.4
	RP11-300E4.2
	RP11-445 L6.3
	MIR1245A
	MXRA5P1
	RNY3P2
	RP11-494
	CTC-260E6.10
	Y_RNA
