# Supplementary material for: Age and poverty status alter the coding and noncoding transcriptome
Source: Aging (Albany NY). 2019 Feb 17;11(4):1189–203. doi: 10.18632/aging.101823 (PMC6402526; doi:10.18632/aging.101823)
Supplement: Supplementary Table 6 [file aging-11-101823-s007.xlsx]

## Sheet: up Young
Supplementary Table 6. mRNAs significantly higher in abundance in young white males.
ProbeName	P-value	FDR	Fold Change	Regulation	type	seqname	ccdsID	GeneSymbol	source	RNAlength	chrom	strand	txStart	txEnd	Sequence	EntrezID	product	group-Y(normalized)	group-O(normalized)
ASHGA5P050622	0.0269428	0.074909	13.2329	up	protein_coding	NM_000576	CCDS2102.1	IL1B	RefSeq	1498	chr2	-	113587336	113594356	ATTTGTGTCTTCCTAAAGAGAGCTGTACCCAGAGAGTCCTGTGCTGAATGTGGACTCAAT	3553	interleukin-1 beta proprotein	7.05685	3.3308
ASHGA5P010424	0.0265586	0.0742696	12.5827	up	protein_coding	ENST00000361365	CCDS14795.1	EIF1AY	GENCODE	1390	chrY	+	22737610	22755040	GAGAAAAAAGGTTTGGATAAATACATCAGACATTATATTGGTTGGTCTACGGGACTATCA	9086	"eukaryotic translation initiation factor 1A, Y-linked [Source:HGNC Symbol;Acc:3252]"	7.22182	3.56844
ASHGA5P012464	0.00883966	0.0380386	11.0183	up	protein_coding	NM_001001437	CCDS32626.1	CCL3L3	RefSeq	780	chr17	-	34522267	34524147	ACTTTGAGACGAGCAGCCAGTGCTCCAAGCCCAGTGTCATCTTCCTAACCAAGAGAGGCC	414062	C-C motif chemokine 3-like 1 precursor	7.5918	4.12997
ASHGA5P012373	0.00163541	0.0145248	10.7955	up	protein_coding	NM_013300	CCDS31899.1	FAM216A	RefSeq	1529	chr12	+	110906231	110928192	TGGCGGCCAGTGAGAAACAAAGAAGGGATAAAAACTGGATATGCATCTAAAACAAGATGT	29902	protein FAM216A	6.51461	3.08225
ASHGA5P051903	0.00235243	0.0177986	10.324	up	protein_coding	NM_031950	CCDS3419.1	FGFBP2	RefSeq	1188	chr4	-	15961862	15964859	GGCCCTGTGCGCCTTTCTCATCAGCTTCTTCCGAGGGTGACAGGTGAAAGACCCCTACAG	83888	fibroblast growth factor-binding protein 2 precursor	8.75191	5.38398
ASHGA5P012740	0.00276445	0.0195159	9.41866	up	protein_coding	NM_001014812	CCDS45278.1	FAM96A	RefSeq	1058	chr15	-	64364760	64386207	GGCGACTCTTATTGTTGGAAATCTACATTTCTGAAGGAACCCACTCAACAGAAGAAGACA	84191	MIP18 family protein FAM96A isoform b precursor	7.97247	4.73695
ASHGA5P003726	0.00323846	0.021506	9.3297	up	protein_coding	NM_138820	CCDS4401.1	HIGD2A	RefSeq	628	chr5	+	175815783	175816751	GAAAAGTTCGTTCGCAAGACCCGCGAGAACCCGGTGGTACCCATAGGTTGCCTGGCCACG	192286	HIG1 domain family member 2A	6.79622	3.57439
ASHGA5P055276	0.000195641	0.00428602	8.50067	up	protein_coding	NM_000365	CCDS8566.1	TPI1	RefSeq	1366	chr12	+	6976692	6980110	AATGGTTGGGACCAGGCCAATCCCTTCTCCACTTACTATAATGGTTGGAACTAAACGTCA	7167	triosephosphate isomerase isoform 1	8.23742	5.14984
ASHGA5P055288	0.00446058	0.0259805	8.46237	up	protein_coding	NM_080387	CCDS8593.1	CLEC4D	RefSeq	1973	chr12	+	8666135	8674960	ATAGACGGCTTTCCTATTTCCTTGGACTTAGAGATGAGAATGCCAAAGGTCAGTGGCGTT	338339	C-type lectin domain family 4 member D	6.6473	3.56624
ASHGA5P000963	0.00134812	0.0129373	7.95294	up	protein_coding	NM_004863	CCDS9865.1	SPTLC2	RefSeq	8164	chr14	-	77972339	78083110	ACCAGCCTTGGTAAAGAGTGTGTACAACAGTTAGCTGAAAACACCAGGTATTTCAGGAGA	9517	serine palmitoyltransferase 2	6.38259	3.3911
ASHGA5P052679	0.0137061	0.0500785	7.92937	up	protein_coding	NM_002124	CCDS47409.1	HLA-DRB1	RefSeq	1280	chr6	-	32546546	32557613	TGAAATGCAGATGACCACATTCAAGGAAGAACTTTCTGCCCCGGCTTTGCAGGATGAAAA	3123	"major histocompatibility complex, class II, DR beta 1 precursor"	9.55457	6.56736
ASHGA5P002929	0.0182268	0.0595308	7.88905	up	protein_coding	NM_001166254	CCDS55175.1	TBXAS1	RefSeq	2132	chr7	+	139478046	139720125	AAGTTCCGGTTCCAAGCCTGCCCTGAGACCCAGGTACCGCTGCAGCTAGAATCCAAATCT	6916	thromboxane-A synthase isoform 4	9.80133	6.82148
ASHGA5P012264	8.78375e-05	0.00265095	7.83536	up	protein_coding	NM_012071	CCDS7137.1	COMMD3	RefSeq	942	chr10	+	22605311	22609246	TACTGGGAAGTATAGGCAGATCTCTCCCTCATATAACGGATGTTTCTTGGCGCTTGGAAT	23412	COMM domain-containing protein 3	7.11062	4.14062
ASHGA5P053791	0.000108179	0.0029704	7.63415	up	protein_coding	NM_003329	CCDS35103.1	TXN	RefSeq	886	chr9	-	113006091	113018920	TTTCCATCGGTCCTTACAGCCGCTCGTCAGACTCCAGCAGCCAAGATGGTGAAGCAGATC	7295	thioredoxin isoform 1	8.10792	5.17545
ASHGA5P012727	0.0201879	0.0632197	7.62606	up	protein_coding	NM_016085	CCDS46243.1	ATRAID	RefSeq	1098	chr2	+	27435218	27440046	TTTGCAATAACACTGGGGACCCAGAAATGTGTCCTGAGAATGGATCTTGTGTACCTGATG	51374	apoptosis-related protein 3 isoform a	6.28629	3.35536
ASHGA5P036430	0.0159998	0.0549157	7.45176	up	protein_coding	NM_021141	CCDS2402.1	XRCC5	RefSeq	3448	chr2	+	216974019	217071016	AACACCGTATTTTATGAAGAGCATAGACTGCATCCGAGCCTTCCGGGAAGAAGCCATTAA	7520	X-ray repair cross-complementing protein 5	8.70811	5.81053
ASHGA5P004383	0.000250433	0.00499744	7.41127	up	protein_coding	ENST00000291439	CCDS12342.1	AP1M1	GENCODE	2355	chr19	+	16308664	16346156	TGTTCTTGGACGTCATCGAGTCTGTCAACCTCTTGGTCAGCGCCAACGGCAATGTCCTGC	8907	"adaptor-related protein complex 1, mu 1 subunit [Source:HGNC Symbol;Acc:13667]"	5.56113	2.67141
ASHGA5P004400	0.0053752	0.0286307	7.20849	up	protein_coding	NM_003681	CCDS13699.1	PDXK	RefSeq	7390	chr21	+	45138977	45182188	CCCCAATAACCTCAAGGTGGCCTGTGAGAAGACCGTGTCTACCTTGCACCACGTTCTGCA	8566	pyridoxal kinase	8.48371	5.63401
ASHGA5P056054	6.60386e-05	0.00227275	7.15217	up	protein_coding	NM_004450	CCDS9794.1	ERH	RefSeq	801	chr14	-	69846839	69865021	TTATAACAAAGACTGGATTAAAGAGAAGATCTACGTGCTCCTTCGTCGGCAGGCCCAACA	2079	enhancer of rudimentary homolog	5.866	3.02761
ASHGA5P011168	0.00356625	0.0226642	7.03493	up	protein_coding	NM_001191003	CCDS53573.1	GSTO1	RefSeq	1070	chr10	+	106013951	106027222	GTTTTCTAAGGTGCCATCCTTGGTAGGAAGCTTTATTAGAAGCCAAAATAAAGAAGACTA	9446	glutathione S-transferase omega-1 isoform 3	10.0682	7.25366
ASHGA5P002080	0.00244607	0.0181487	7.01659	up	protein_coding	NM_005720	CCDS5661.1	ARPC1B	RefSeq	1551	chr7	+	98972297	98992404	AGAAGATGGCCGTCGCGACTCTGGCCTCTGAAACACTACCACTGCTGGCGCTGACCTTCA	10095	actin-related protein 2/3 complex subunit 1B	5.52611	2.71534
ASHGA5P001281	0.00206589	0.0166234	6.95091	up	protein_coding	ENST00000393622	CCDS45696.1	HDAC5	GENCODE	5324	chr17	-	42154120	42201014	CAGTGTAGAGCTGCAGCCCTTGGATGAGGCAGTCTTGCAGCAAAAGCCCAACATCAACGC	10014	histone deacetylase 5 [Source:HGNC Symbol;Acc:14068]	6.68761	3.89041
ASHGA5P038920	0.00434697	0.0256413	6.94183	up	protein_coding	ENST00000273352	CCDS2938.1	GPR128	GENCODE	3140	chr3	+	100328432	100414323	TTTTACTTTTGCCAGAATCCCAGTGGGCAGATATGGACCATCCTTGCAAACATGTGGCAA	84873	G protein-coupled receptor 128 [Source:HGNC Symbol;Acc:19241]	5.45259	2.65727
ASHGA5P004775	0.0019272	0.0159743	6.84303	up	protein_coding	NM_024632	CCDS4326.1	SAP30L	RefSeq	6243	chr5	+	153825516	153840613	CATTCCTGAGGTTGATCTGTTCCAGCTGCAGGTGAACACCCTACGACGTTATAAACGACA	79685	histone deacetylase complex subunit SAP30L isoform 1	7.02578	4.25114
ASHGA5P036990	0.0288209	0.077624	6.81305	up	protein_coding	ENST00000480798	CCDS13165.2	CST7	GENCODE	930	chr20	+	24929865	24940564	AAATATATGCTGGAGGTGGAAATTGGCAGAACTACCTGCAAGAAAAACCAGCACCTGCGT	8530	cystatin F (leukocystatin) [Source:HGNC Symbol;Acc:2479]	6.97401	4.20571
ASHGA5P041918	5.03943e-05	0.00197449	6.72661	up	protein_coding	NM_004242	CCDS4988.1	HMGN3	RefSeq	935	chr6	-	79910961	79944455	GTTCCAGTCCGTTGCTTTACTTTTTGCTTCACCGACATAGTCATTATGCCGAAGAGAAAG	9324	high mobility group nucleosome-binding domain-containing protein 3 isoform HMGN3a	7.1708	4.42093
ASHGA5P055279	0.00620624	0.0308555	6.67072	up	protein_coding	ENST00000456013	CCDS44821.1	PTPN6	GENCODE	2389	chr12	+	7060433	7070479	CCCGGCTGCAGACACAAGGAGGATGTGTATGAGAACCTGCACACTAAGAACAAGAGGGAG	5777	"protein tyrosine phosphatase, non-receptor type 6 [Source:HGNC Symbol;Acc:9658]"	7.01549	4.27764
ASHGA5P052268	2.34091e-05	0.00124202	6.64694	up	protein_coding	NM_022145	CCDS3984.1	CENPK	RefSeq	1753	chr5	-	64813592	64858995	TTAGTGATTCCTTTTGGCCACCTTATGTTGAGCTGCTGCTGCGTAATGGAATTGCCTTGA	64105	centromere protein K	8.86435	6.13166
ASHGA5P013590	0.00203253	0.016472	6.53791	up	protein_coding	NM_033301	CCDS6433.1	RPL8	RefSeq	967	chr8	-	146015153	146017729	CGCGGAGAGGGACCCGTCGCCATGGGCCGTGTGATCCGTGGACAGAGGAAGGGCGCCGGG	6132	60S ribosomal protein L8	6.36307	3.65424
ASHGA5P005049	0.00953463	0.0398397	6.53358	up	protein_coding	ENST00000300584	CCDS45314.1	TBC1D2B	GENCODE	6067	chr15	-	78287326	78369994	TATCTCCGCTACTTCACTCGCACTATCCTTGATGCTAGGAAGCTGATCAGTATCTCCTTT	23102	"TBC1 domain family, member 2B [Source:HGNC Symbol;Acc:29183]"	6.4209	3.71302
ASHGA5P014546	0.00650263	0.031709	6.49524	up	protein_coding	NM_015079	CCDS32301.2	TBC1D2B	RefSeq	6035	chr15	-	78287326	78369994	ACTCGCACTATCCTTGATGCTAGATCCGGAACCGACGCGCCTACCACTTGGAGAAAGTCC	23102	TBC1 domain family member 2B isoform b	6.16112	3.46174
ASHGA5P030849	0.00880382	0.0379537	6.35104	up	protein_coding	NM_001001410	CCDS10435.1	TSR3	RefSeq	1214	chr16	-	1399240	1401873	ATCCCTTCGATGTGGATTCAGGGAGAGAGTTTGGAAACCCCAACAGGCCTGTGGCCAGCA	115939	probable ribosome biogenesis protein C16orf42	5.79261	3.12562
ASHGA5P007680	0.00529695	0.02849	6.32	up	protein_coding	NM_001114735	CCDS45322.1	BCL2A1	RefSeq	955	chr15	-	80253231	80263643	ACAAGAAGAGGAAAATGGCTTTGTAAAGAAGTTTGAACCTAAATCTGGCTGGATGACTTT	597	bcl-2-related protein A1 isoform 2	8.45035	5.79043
ASHGA5P009271	0.000649867	0.00880855	6.31081	up	protein_coding	NM_001098671	CCDS31598.1	RASGRP2	RefSeq	2284	chr11	-	64494382	64511630	GTAATAGATGCTGTGGTTGGATCAAGGACTCATTCCTGCCTTGGAGAAAATACTTCAACC	10235	RAS guanyl-releasing protein 2	8.56427	5.90644
ASHGA5P055720	0.000235887	0.00483497	6.27478	up	protein_coding	NM_003440	CCDS9282.1	ZNF140	RefSeq	3067	chr12	+	133657036	133684258	TAACAGTCTCTCATCAAGAAGCCCTGGCTCAACATATGAATATCAGTACTGTGGAGAGGC	7699	zinc finger protein 140	5.73479	3.08523
ASHGA5P004186	0.00509551	0.0279353	6.17558	up	protein_coding	NM_014435	CCDS43239.1	NAAA	RefSeq	1880	chr4	-	76834808	76862166	AGCAAACCTCAGCCTGGAGGCACTTTTCCAGATTTTGTCGGTGGTTCCAGTTTATAACAA	27163	N-acylethanolamine-hydrolyzing acid amidase isoform 1 precursor	6.62918	4.0026
ASHGA5P010335	0.00560768	0.0292206	6.14768	up	protein_coding	ENST00000360839	CCDS4225.1	ANKHD1	GENCODE	8221	chr5	+	139781398	139919441	TGCCCAGCAGATTTGGCCTGGCACGTGGGCACCTCATATTGGAAACATGCATCTCAAATA	54882	ankyrin repeat and KH domain containing 1 [Source:HGNC Symbol;Acc:24714]	6.9396	4.31956
ASHGA5P004263	0.0133575	0.0493742	6.11151	up	protein_coding	NM_147223	CCDS1713.1	NCOA1	RefSeq	6952	chr2	+	24807345	24993570	CTTCTCAAAACAGAAGCAGATGGAACCCAGGACAAGAAGACAGAAGAGTTCTTCTCTGTG	8648	nuclear receptor coactivator 1 isoform 2	6.2498	3.63827
ASHGA5P001255	0.00571975	0.0295524	6.10567	up	protein_coding	NM_002795	CCDS11328.1	PSMB3	RefSeq	784	chr17	+	36909001	36920478	ATGAGAAACGGTTTGGCCCTTACTACACTGAGCCAGTCATTGCCGGGTTGGACCCGAAGA	5691	proteasome subunit beta type-3	6.4044	3.79426
ASHGA5P021738	0.00575011	0.0295997	6.08301	up	protein_coding	NM_001177963	CCDS53899.1	MNAT1	RefSeq	1271	chr14	+	61201458	61435398	AGATGAGCTGGGTCAACATATTTCACTGGCACCTATTCACAAGCTTGAAGAAGCTCTGTA	4331	CDK-activating kinase assembly factor MAT1 isoform 2	7.52145	4.91667
ASHGA5P006676	0.01928	0.0613576	6.01826	up	protein_coding	NM_007104	CCDS4806.1	RPL10A	RefSeq	719	chr6	+	35436177	35438558	AGAAGCCATGAGCAGCAAAGTCTCTCGCGACACCCTGTACGAGGCGGTGCGGGAAGTCCT	4736	60S ribosomal protein L10a	7.53445	4.9451
ASHGA5P027654	0.0153918	0.0536628	6.01589	up	protein_coding	ENST00000528880	CCDS53842.1	HCAR3	GENCODE	2137	chr12	-	123199302	123201439	AGGATAGAAAGCTGTTTCCCACCTGTTTGCTTTTACCATTAAAAGGGAAACGTGCCTCTG	8843	hydroxycarboxylic acid receptor 3 [Source:HGNC Symbol;Acc:16824]	6.79277	4.204
ASHGA5P014053	0.0300829	0.0793246	6.01415	up	protein_coding	NM_002123	CCDS43451.1	HLA-DQB1	RefSeq	1656	chr6	-	32627240	32634466	AGTCAGAAAGGGCTTCTGCACTGACTCCTGAGACTATTTTAACTAGGATTGGTTATCACT	3119	"HLA class II histocompatibility antigen, DQ beta 1 chain isoform 1 precursor"	6.40086	3.8125
ASHGA5P044882	0.0030398	0.0206857	5.9555	up	protein_coding	NM_015364	CCDS6216.1	LY96	RefSeq	642	chr8	+	74903563	74941307	TTAACCCCTGTATAGAATTGAAAAGATCCAAAGGATTATTGCACATTTTCTACATTCCAA	23643	lymphocyte antigen 96 isoform 1 precursor	7.09019	4.51597
ASHGA5P049861	0.00240779	0.0179799	5.91552	up	protein_coding	NM_001143999	CCDS11752.1	SEC14L1	RefSeq	5542	chr17	+	75137004	75213181	TGATCTCCAGGTAGTGCCGCGCTGCCTGCACCTAGTGTGCAGAGGGGACGGCCGCCCCTC	6397	SEC14-like protein 1 isoform a	5.30203	2.73752
ASHGA5P038341	0.000486576	0.00752696	5.85007	up	protein_coding	NM_020654	CCDS2941.2	SENP7	RefSeq	4934	chr3	-	101043117	101232085	TGGCAGCCTAGAATCTTATCAAAATCTAAACCCTCACAAGAGCTGTTATTTATCTGAAAG	57337	sentrin-specific protease 7 isoform 1	5.65489	3.10644
ASHGA5P001514	0.00488822	0.0272766	5.84276	up	protein_coding	NM_005813	CCDS1789.1	PRKD3	RefSeq	5907	chr2	-	37477645	37544222	CTGGCTACAGGACTATCAGACTTGGCTTGACCTTAGAGAATTTGAAACTCGCATTGGAGA	23683	serine/threonine-protein kinase D3	6.1715	3.62485
ASHGA5P054685	0.00471269	0.0266712	5.8311	up	protein_coding	NM_000518	CCDS7753.1	HBB	RefSeq	626	chr11	-	5246695	5248301	TCACCTGGACAACCTCAAGGGCACCTTTGCCACACTGAGTGAGCTGCACTGTGACAAGCT	3043	hemoglobin subunit beta	7.18994	4.64618
ASHGA5P035997	0.00195563	0.0161051	5.70543	up	protein_coding	ENST00000339276	CCDS288.1	SFN	GENCODE	1315	chr1	+	27189632	27190947	GAAAGCATGTCTGCTGGGTGTGACCATGTTTCCTCTCAATAAAGTTCCCCTGTGACACTC	2810	stratifin [Source:HGNC Symbol;Acc:10773]	7.13419	4.62186
ASHGA5P013783	0.000281963	0.00530934	5.6731	up	protein_coding	NM_172088	CCDS42256.1	TNFSF13	RefSeq	2112	chr17	+	7461608	7464925	TCTCCACATGGAACCTTCCTGGGACTTTGATTTTACGGATATCTTGCTTCTGTTCCCCAT	8741	tumor necrosis factor ligand superfamily member 13 isoform gamma proprotein	5.80504	3.3009
ASHGA5P054240	0.0254188	0.0725989	5.66894	up	protein_coding	NM_015714	CCDS1488.1	G0S2	RefSeq	978	chr1	+	209848669	209849735	AGAGCCCAGAGCCGAGATGGAAACGGTCCAGGAGCTGATCCCCCTGGCCAAGGAGATGAT	50486	G0/G1 switch protein 2	9.15975	6.65667
ASHGA5P053732	0.0297023	0.0790009	5.66468	up	protein_coding	NM_004600	CCDS1379.1	TROVE2	RefSeq	3251	chr1	+	193029003	193055115	TATGATTTAACCATAAGCAGCAGCACGATCCAGAGATCCATTGCCATCAGTGATCTCACT	6738	60 kDa SS-A/Ro ribonucleoprotein isoform 2	8.62075	6.11876
ASHGA5P012467	0.00485069	0.0271505	5.65547	up	protein_coding	NM_016299	CCDS7103.1	HSPA14	RefSeq	1810	chr10	+	14880260	14913740	TATCAACAAGGTTGTCCTTTGTGGAGGGTCTTCTCGAATCCCAAAGCTACAGCAACTGAT	51182	heat shock 70 kDa protein 14 isoform 1	5.6689	3.16925
ASHGA5P003539	0.0110675	0.0438584	5.65443	up	protein_coding	NM_000454	CCDS33536.1	SOD1	RefSeq	981	chr21	+	33031934	33041243	CAATTTCGAGCAGAAGGAAAGTAATGGACCAGTGAAGGTGTGGGGAAGCATTAAAGGACT	6647	superoxide dismutase [Cu-Zn]	7.59849	5.09911
ASHGA5P021988	0.000284396	0.00533408	5.6165	up	protein_coding	NM_001142798	CCDS45595.1	C17orf49	RefSeq	913	chr17	+	6918055	6920843	AACTTCGACCAGGACAGCCTGACCCTGGATTCTGGCCTTCTCATGACCTCTGCTGATCCT	124944	chromatin complexes subunit BAP18 isoform 1	7.61574	5.12606
ASHGA5P009120	0.0331329	0.0839379	5.58611	up	protein_coding	NM_199185	CCDS4377.1	NPM1	RefSeq	1362	chr5	+	170814707	170837888	GCCAGTGAAGAAAGGACAAGAATCCTTCAAGAAACAGGAAAAAACTCCTAAAACACCAAA	4869	nucleophosmin isoform 2	6.43839	3.95654
ASHGA5P054557	0.0300136	0.0793211	5.57631	up	protein_coding	NM_015960	CCDS7483.1	CUTC	RefSeq	1378	chr10	+	101491957	101515894	AAGTAAGGACTTTGAATGCTATCGCAAAGAACATCCTGGTGTAGCCAGACCTCTCTGAGA	51076	copper homeostasis protein cutC homolog	5.82634	3.34703
ASHGA5P005023	0.0139779	0.0507729	5.44858	up	protein_coding	NM_206939	CCDS7985.1	MS4A7	RefSeq	2976	chr11	+	60145957	60163426	AGCTCTGTGTTTTGGCATTACTGGATCCCTCTCAATTATCTCTGGAAAACAATCAACTAA	58475	membrane-spanning 4-domains subfamily A member 7 isoform 1	6.61815	4.17227
ASHGA5P042481	5.2551e-05	0.00200267	5.44472	up	protein_coding	NM_020931	CCDS34480.1	KIAA1586	RefSeq	2903	chr6	+	56911383	56920023	CTTGAATACATCGATCTGGTCTGTGGTGATGATGAAAACCCTAGCGCCTATTATAGTGAT	57691	uncharacterized protein KIAA1586	5.52632	3.08146
ASHGA5P001875	0.000220005	0.00462102	5.44187	up	protein_coding	NM_004546	CCDS5862.1	NDUFB2	RefSeq	509	chr7	+	140396480	140406446	TGGAGTCCGTCATGCCGGTGGTGGTGTGCACATTGAGCCCCGGTATAGACAGTTCCCCCA	4708	"NADH dehydrogenase [ubiquinone] 1 beta subcomplex subunit 2, mitochondrial precursor"	8.10036	5.65626
ASHGA5P007572	0.0328634	0.0835757	5.42519	up	protein_coding	NM_002624	CCDS8853.1	PFDN5	RefSeq	743	chr12	+	53689234	53693234	CTGAACGTGCTGAACAAGAGCAACGAGGGGAAAGAATTACTCGTCCCACTGACGAGTTCT	5204	prefoldin subunit 5 isoform alpha	7.66751	5.22784
ASHGA5P007417	0.0133989	0.0493742	5.42256	up	protein_coding	NM_007235	CCDS31852.1	XPOT	RefSeq	3961	chr12	+	64798152	64842463	TAAAAATTACTTAAAGGTGTTCTTCCAGAGAGCAAAGCCCTGAGGACTGGATTTCCCTGT	11260	exportin-T	6.94189	4.50292
ASHGA5P009313	0.013286	0.049207	5.42176	up	protein_coding	NM_019554	CCDS1042.1	S100A4	RefSeq	564	chr1	-	153516094	153518282	ATAGTACGTGTTGATCCTGACTGCTGTCATGGCGTGCCCTCTGGAGAAGGCCCTGGATGT	6275	protein S100-A4	6.93036	4.4916
ASHGA5P003246	0.0205798	0.0640932	5.33459	up	protein_coding	NM_080426	CCDS46624.1	GNAS	RefSeq	1884	chr20	+	57466425	57486250	TGAGTTTCTGAGGATCAGCACTGCCAGTGGAGATGGGCGTCACTACTGCTACCCTCATTT	2778	protein ALEX GNASS	7.20792	4.79254
ASHGA5P052967	0.00601733	0.0303438	5.31298	up	protein_coding	NM_016265	CCDS47538.1	ZNF12	RefSeq	5074	chr7	-	6728063	6746566	GAAGAGAGAGGTAATGTTCCTGGTAAAACTTTTGATGTAGAAACGAACCCTGTTCCTTCA	7559	zinc finger protein 12 isoform a	7.86527	5.45575
ASHGA5P013715	0.00295418	0.0203202	5.21936	up	protein_coding	NM_018221	CCDS46340.1	MOB1A	RefSeq	1336	chr2	-	74383210	74405995	CTTTGTTCAGGAGTTTAATCTGATTGATAGGCGTGAGCTGGCACCTCTTCAAGAATTAAT	55233	MOB kinase activator 1A	6.32158	3.93771
ASHGA5P010978	0.002092	0.0166885	5.18578	up	protein_coding	NM_145062	CCDS5110.1	ZUFSP	RefSeq	2226	chr6	-	116956780	116989973	AGGAGAAACTTGCCAGGAGACAAGCTTCTCAAGTCTTTACAGCCGAGAAGATTCCTTGAA	221302	zinc finger with UFM1-specific peptidase domain protein	6.97605	4.60149
ASHGA5P008627	0.0232199	0.0690109	5.14687	up	protein_coding	ENST00000420646	CCDS43252.1	SNCA	GENCODE	3127	chr4	-	90645249	90758127	AGTTGGGCAAGGAAGGGTATCAAGACTACGAACCTGAAGCCTAAGAAATATCTTTGCTCC	6622	"synuclein, alpha (non A4 component of amyloid precursor) [Source:HGNC Symbol;Acc:11138]"	6.30343	3.93973
ASHGA5P054329	0.0207189	0.0642891	5.13539	up	protein_coding	NM_001139459	CCDS44343.1	CNST	RefSeq	2562	chr1	+	246729638	246811544	TTGATGATCTTGCCAAAAGGATAGAGATTGCAGAGGTAAATCAGAGATGAAGTACAATTA	163882	consortin isoform 2	6.31391	3.95344
ASHGA5P050877	0.00669333	0.0322484	5.13374	up	protein_coding	NM_002712	CCDS2546.1	PPP1R7	RefSeq	1299	chr2	+	242089901	242122439	CGTGCGGCAGATCGATGCCACGTTCGTCAGGTTCTGAGTCCTTCTTGGCTCCTCATGTGG	5510	protein phosphatase 1 regulatory subunit 7	7.47099	5.11098
ASHGA5P030763	0.034101	0.0852274	5.12799	up	protein_coding	NM_013272	CCDS10371.1	SLCO3A1	RefSeq	5106	chr15	+	92396937	92709137	CGTTTTATAGTGACTAAAGGAGGGCTGAACTCTGTATTAGTAATCCAAGGGTCATTTTTT	28232	solute carrier organic anion transporter family member 3A1 isoform 1	6.24461	3.88622
ASHGA5P011836	0.00859688	0.0374409	5.12687	up	protein_coding	NM_014222	CCDS6835.1	NDUFA8	RefSeq	859	chr9	-	124906337	124922098	ACTGTCAAAGGTCACCAAAGTGAAAACAGATCGACCTTTACCGGAGAATCCCTATCACTC	4702	NADH dehydrogenase [ubiquinone] 1 alpha subcomplex subunit 8	6.75224	4.39416
ASHGA5P006686	0.0400684	0.0931375	5.12078	up	protein_coding	NM_004152		OAZ1	RefSeq	1146	chr19	+	2269519	2273487	GCAAGGACAGCTTTGCAGTTCTCCTGGAGTTCGCTGAGGAGCAGCTGCGAGCCGACCATG	4946	ornithine decarboxylase antizyme 1	6.58077	4.22441
ASHGA5P055563	0.00431932	0.0255374	5.11844	up	protein_coding	NM_001731	CCDS9043.1	BTG1	RefSeq	4704	chr12	-	92534053	92539673	AGAACGAGCCCTTCCAAAAACTACAATATGATGACTGTATCAGGTTAAGATATAGTCTGT	694	protein BTG1	8.60961	6.2539
ASHGA5P025168	0.00347811	0.0223523	5.11793	up	protein_coding	NM_000442		PECAM1	RefSeq	6831	chr17	-	62396776	62407083	CAGATACTCTAGAACGGAAGGCTCCCTTGATGGAACTTAGACAGCAAGGCCAGATGCACA	5175	platelet endothelial cell adhesion molecule precursor	6.24448	3.88892
ASHGA5P001839	0.00299836	0.0205133	5.11252	up	protein_coding	ENST00000437550	CCDS46057.1	HCST	GENCODE	504	chr19	+	36393381	36395173	TTCCTGCTTTTGCTCCCAGTGGCTGCAGCTCAGACGACTCCAGGAGAGAGATCATCACTC	10870	hematopoietic cell signal transducer [Source:HGNC Symbol;Acc:16977]	7.54146	5.18742
ASHGA5P010989	0.000142288	0.00353534	5.0996	up	protein_coding	NM_001033564	CCDS34513.1	C6orf225	RefSeq	2682	chr6	+	112408673	112423993	GCCTCTTTTGGTTTTCAGTGAAGTATGCCTTTTCAATTTGGAACCCAGCCAAGGAGGTTT	619208	UPF0731 protein C6orf225	5.07047	2.72009
ASHGA5P000810	0.000392961	0.00657086	5.08728	up	protein_coding	NM_178273	CCDS47660.1	PILRA	RefSeq	1070	chr7	+	99971067	99997722	AGATCCCAAGCTAAATCCCAAGGATGACGGCATCGTCTATGCTTCCCTTGCCCTCTCCAG	29992	paired immunoglobulin-like type 2 receptor alpha isoform 3 precursor	8.94468	6.59778
ASHGA5P011208	0.00673061	0.0323632	5.07458	up	protein_coding	NM_003491	CCDS14737.1	NAA10	RefSeq	1136	chrX	-	153195279	153200607	ACCTCTATTCCAACACCCTCAACTTTCAGATCAGTGAAGTGGAGCCCAAATACTATGCAG	8260	N-alpha-acetyltransferase 10 isoform 1	7.12427	4.78098
ASHGA5P006476	0.0209374	0.0646919	5.06882	up	protein_coding	NM_002831	CCDS44820.1	PTPN6	RefSeq	2321	chr12	+	7060433	7070479	CCTCGTCCAAACACAAGGAGGATGTGTATGAGAACCTGCACACTAAGAACAAGAGGGAGG	5777	tyrosine-protein phosphatase non-receptor type 6 isoform 1	7.06744	4.72579
ASHGA5P050060	0.00475063	0.0267522	5.05836	up	protein_coding	NM_015414	CCDS12147.1	RPL36	RefSeq	557	chr19	+	5690345	5691678	CTGTCCGCAGCCATGGCCCTACGCTACCCTATGGCCGTGGGCCTCAACAAGGGCCACAAA	25873	60S ribosomal protein L36	8.70835	6.36968
ASHGA5P049604	7.90111e-05	0.00249964	5.03384	up	protein_coding	NM_015986	CCDS32607.1	CRLF3	RefSeq	2954	chr17	-	29109701	29151778	ATGACTGCCAGAAGCTCATAGAACACGGAGTCAACACTGCAGAGGACTTAGTCCGAGAAG	51379	cytokine receptor-like factor 3	5.08393	2.75227
ASHGA5P034335	0.00711127	0.0333836	5.02292	up	protein_coding	NM_181985	CCDS12889.1	LILRA5	RefSeq	1329	chr19	-	54818352	54824409	TCTCATCCGCATGGGCATGGCCGGCTTGATCCTGGTGGTCCTTGGGATTCTGATATTTCA	353514	leukocyte immunoglobulin-like receptor subfamily A member 5 isoform 2	7.12085	4.79233
ASHGA5P001718	0.029355	0.0784413	5.0217	up	protein_coding	NM_004688	CCDS2192.1	NMI	RefSeq	1501	chr2	-	152126981	152146430	AAAGTATCAGATATTTTCAGGAACATCTAAGAGGACAGTGCTTCTGACAGGAATGGAAGG	9111	N-myc-interactor	7.61902	5.29084
ASHGA5P011588	0.00839507	0.0368147	5.01769	up	protein_coding	NM_203290	CCDS4901.1	POLR1C	RefSeq	1353	chr6	+	43484776	43489246	CATTATATCTTCTCTGTTGAGTCAACGGGGGTGTTGCCACCAGATGTGCTGGTGAGTGAA	9533	DNA-directed RNA polymerases I and III subunit RPAC1	5.27395	2.94692
ASHGA5P030649	0.0261475	0.0737735	4.98449	up	protein_coding	NM_006465	CCDS10264.1	ARID3B	RefSeq	4253	chr15	+	74833547	74890472	TTGAAGGTGTCTCAGACATTTGGCCAGTATGTCTTTCTCAGGGGTTTGGTCACAAAGGAT	10620	AT-rich interactive domain-containing protein 3B	5.35807	3.04062
ASHGA5P004963	0.0394032	0.0921699	4.98339	up	protein_coding	NM_014358	CCDS8594.1	CLEC4E	RefSeq	2158	chr12	-	8685900	8693558	GGAGGAGCAGGAATTCCTTTCCTACAAGAAACCTAAAATGAGAGAGTTTTTTATTGGACT	26253	C-type lectin domain family 4 member E	5.76865	3.45152
ASHGA5P008102	9.232e-08	3.1349e-05	4.97098	up	protein_coding	NM_001184739	CCDS53890.1	TSSK4	RefSeq	1330	chr14	+	24674925	24677454	ATCGTGCACCGCCTGATGCCCAGCCTTTCTGCTGCTGGTAGGGACTTAAAGTTGGAGAAC	283629	testis-specific serine/threonine-protein kinase 4 isoform 1	6.50521	4.19168
ASHGA5P055154	0.0250955	0.0722313	4.97096	up	protein_coding	NM_016090	CCDS8370.1	RBM7	RefSeq	2025	chr11	+	114271383	114279635	CACTAACACATGTTAAAAGGACATTGTTTTTATAGGGTCATTTTAGGCCCTTTGACTAAG	10179	RNA-binding protein 7	5.88185	3.56833
ASHGA5P013360	0.000266684	0.00513638	4.97085	up	protein_coding	NM_145206	CCDS7575.2	VTI1A	RefSeq	4401	chr10	+	114206755	114578504	TGTTGCGAAGAATCATCCAGAACCGCATCCTGCTCGTCATCCTAGGGATCATCGTGGTCA	143187	vesicle transport through interaction with t-SNAREs homolog 1A	7.24136	4.92786
ASHGA5P052852	0.000994563	0.0108708	4.96949	up	protein_coding	ENST00000324172	CCDS5139.1	SAMD3	GENCODE	993	chr6	-	130504132	130536435	TACAATGACGTGGTTAATGCCCTGCTGCAGGCCCACCCTTTCCTGGATGAGGATGGCTGT	154075	sterile alpha motif domain containing 3 [Source:HGNC Symbol;Acc:21574]	6.27857	3.96547
ASHGA5P010817	0.00553939	0.0290127	4.95169	up	protein_coding	NM_016217	CCDS5194.1	HECA	RefSeq	5621	chr6	+	139456248	139501946	AGATCGAATATGATGTTCCTTGTCACCTTCAAGGGAGACTCATGCATCTGTATGCCGTGT	51696	headcase protein homolog	6.64259	4.33467
ASHGA5P004996	0.0326452	0.0834103	4.94037	up	protein_coding	NM_032231	CCDS10189.1	FAM96A	RefSeq	1108	chr15	-	64364760	64386207	CAGCGATGTTTACCATTTAAACATAAGTTGGAAATCTACATTTCTGAAGGAACCCACTCA	84191	MIP18 family protein FAM96A isoform a precursor	6.56136	4.25674
ASHGA5P005618	0.00993348	0.0408697	4.8793	up	protein_coding	NM_001335	CCDS8117.1	CTSW	RefSeq	1327	chr11	+	65647283	65651212	GGGAGAGAAGGGCTATTTCCGGCTGCACCGAGGGAGCAATACCTGTGGCATCACCAAGTT	1521	cathepsin W preproprotein	6.17685	3.89017
ASHGA5P051328	0.000122035	0.00314801	4.87543	up	protein_coding	NM_145298	CCDS33648.1	APOBEC3F	RefSeq	4706	chr22	+	39436672	39451975	AAATGGCTGTAAGTCTTGGACTCCTTGCTATAATCGCAGCTATTCAGCAATGGAACCTCC	200316	DNA dC->dU-editing enzyme APOBEC-3F isoform a	5.44272	3.15719
ASHGA5P048980	8.54067e-05	0.00262851	4.80204	up	protein_coding	NM_012217	CCDS10432.1	TPSD1	RefSeq	855	chr16	+	1306272	1308494	TGCTCCCCAGATGCTGAGCCTGCTGCTGCTGGCGCTGCCCGTCCTGGCGAGCCCGGCCTA	23430	tryptase delta precursor	8.43587	6.17222
ASHGA5P002231	9.547e-08	3.1373e-05	4.79938	up	protein_coding	ENST00000421025	CCDS47592.1	ZNF679	GENCODE	1567	chr7	+	63688851	63727309	AAACACCCAGTTATGTGTTCTCATTTCACCCAAGACCTTCCGCCAGAGCTAGGCATAAAA	168417	zinc finger protein 679 [Source:HGNC Symbol;Acc:28650]	6.34296	4.08011
ASHGA5P007884	0.0353684	0.0868541	4.79449	up	protein_coding	NM_001623	CCDS4706.1	AIF1	RefSeq	639	chr6	+	31583032	31584798	CCCTCCAAACTGGAAGGCTTCAAAGAGAAATACATGGAGTTTGACCTTAATGGAAATGGC	199	allograft inflammatory factor 1 isoform 3	7.48495	5.22358
ASHGA5P054877	3.32134e-05	0.00149877	4.78701	up	protein_coding	NM_001079807	CCDS31574.1	PGA3	RefSeq	1396	chr11	+	60970983	60980350	TTCCCTGTCCTACCAATAACGTAGAATAAAAACATAACCCACTGAAACAGGTTTTGTGGA	643834	pepsin A preproprotein	7.57116	5.31204
ASHGA5P019052	0.000380604	0.00646202	4.77627	up	protein_coding	NM_015952	CCDS34520.1	RWDD1	RefSeq	1081	chr6	+	116892582	116914436	TCCTTCACAGTATTATCAGAAAATCCACCCAGCTTCACCATTACTGTGACGTCTGAGGCT	51389	RWD domain-containing protein 1 isoform a	6.01093	3.75505
ASHGA5P001538	0.033654	0.0845325	4.76564	up	protein_coding	NM_002923	CCDS1377.1	RGS2	RefSeq	1375	chr1	+	192778168	192781407	GGAAGCTCCAAAAGAGATAAACATAGATTTTCAAACCAAAACTCTGATTGCCCAGAATAT	5997	regulator of G-protein signaling 2	6.89885	4.64618
ASHGA5P001021	0.00650552	0.031709	4.74436	up	protein_coding	ENST00000217901	CCDS14730.1	IDH3G	GENCODE	1485	chrX	-	153051220	153059978	CTCCATCCGTAAGGCTGTCCTGGCATCCATGGACAATGAGAATATGCACACTCCGGACAT	3421	isocitrate dehydrogenase 3 (NAD+) gamma [Source:HGNC Symbol;Acc:5386]	8.40635	6.16014
ASHGA5P006620	0.0193484	0.0615176	4.73367	up	protein_coding	NM_015344	CCDS6075.1	LEPROTL1	RefSeq	2721	chr8	+	29952921	29965587	AGCACATCTGATTGAGTGGGGAGCTTGTGCACTTGTTCTCACAGGAAACACAGTCATCTT	23484	leptin receptor overlapping transcript-like 1 isoform 1	6.91348	4.67052
ASHGA5P034928	0.011022	0.0437745	4.71138	up	protein_coding	NM_001013663	CCDS33156.1	PTRHD1	RefSeq	602	chr2	-	25013135	25016251	ATACTTGGTGTTACGAAAGGATCTATCACAAGCTCCGTTCTCCTGGCCGGCGGGCGCACT	391356	putative peptidyl-tRNA hydrolase PTRHD1	5.96652	3.73037
ASHGA5P005958	0.0362438	0.0879714	4.69576	up	protein_coding	NM_213595	CCDS44966.1	ISCU	RefSeq	1093	chr12	+	108956293	108963160	TCACAAGAAGGTTGTTGATCATTATGAAAATCCTAGAAACGTGGGGTCCCTTGACAAGAC	23479	"iron-sulfur cluster assembly enzyme ISCU, mitochondrial isoform ISCU2"	5.58966	3.3583
ASHGA5P012848	0.0271272	0.0753008	4.68881	up	protein_coding	NM_002097	CCDS45019.1	GTF3A	RefSeq	1404	chr13	+	27998680	28009846	CACGGGGGAGAGACCATTTGTTTGTGACTATGAAGGGTGTGGCAAGGCCTTCATCAGGGA	2971	transcription factor IIIA	7.45061	5.22139
ASHGA5P008132	6.86897e-05	0.00233666	4.67512	up	protein_coding	ENST00000340192	CCDS54279.1	ERCC1	GENCODE	3310	chr19	-	45910590	45927177	TTCGTCTCCCGGTCTCTGGAACAGCTCATCGCCGCATCAAGAGAAGATCTGGCCTTATGC	2067	"excision repair cross-complementing rodent repair deficiency, complementation group 1 (includes overlapping antisense sequence) [Source:HGNC Symbol;Acc:3433]"	7.75851	5.5335
ASHGA5P055400	0.00686041	0.0327033	4.66722	up	protein_coding	NM_001170804	CCDS53789.1	LARP4	RefSeq	1681	chr12	+	50794591	50855272	GTAGGGGCAGGTAAGAAAATAAAGTACCTGAAAACCTTTGATAATAATGTGATCATCCTG	113251	la-related protein 4 isoform e	6.6422	4.41964
ASHGA5P002618	0.0479384	0.103049	4.65267	up	protein_coding	NM_017917	CCDS9654.1	PPP2R3C	RefSeq	1843	chr14	-	35554677	35591519	TGGAGAAATGGACTATAAGACCTACTTGGACTTTGTCCTTGCATTAGAAAACAGAAAGGA	55012	serine/threonine-protein phosphatase 2A regulatory subunit B'' subunit gamma	5.80572	3.58766
ASHGA5P004569	0.000117853	0.00310225	4.64817	up	protein_coding	NM_032574	CCDS1777.1	DPY30	RefSeq	800	chr2	-	32248971	32264844	CCGCGCCCAGACTGGTATCCGGGGACTGTGACTTGCAGGGTCCGCCATGGAGCCAGAGCA	84661	protein dpy-30 homolog	5.8672	3.65053
ASHGA5P007121	0.0143714	0.051568	4.63469	up	protein_coding	NM_001040431	CCDS32660.1	COA3	RefSeq	772	chr17	-	40949651	40950704	TTGGCTATTTATGGTTACACCTTCTACTCGATTTCCCAGGAGCGTTTCCTAGATGAGCTA	28958	cytochrome oxidase assembly	5.67621	3.46373
ASHGA5P051116	0.000877606	0.0101133	4.63257	up	protein_coding	ENST00000344691	CCDS42922.1	RUNX1	GENCODE	7274	chr21	-	36160097	36260987	TGCAGGGTCCTAACTCAATCGGCTTGTTGTGATGCGTATCCCCGTAGATGCCAGCACGAG	861	runt-related transcription factor 1 [Source:HGNC Symbol;Acc:10471]	6.9988	4.78698
ASHGA5P013480	0.00207008	0.0166327	4.58579	up	protein_coding	NM_020202	CCDS33806.1	NIT2	RefSeq	1271	chr3	+	100053561	100074478	TTCAGACATAGACCTGAAGAAGCTGGCTGAAATACGCCAGCAAATCCCCGTTTTTAGACA	56954	omega-amidase NIT2	7.59975	5.40258
ASHGA5P003198	0.0403806	0.0935693	4.56127	up	protein_coding	NM_003143	CCDS5866.1	SSBP1	RefSeq	714	chr7	+	141438120	141450288	TGTATTACAGGTACTTCGTCAGTTTGTAAGACATGAGTCCGAAACAACTACCAGTTTGGT	6742	"single-stranded DNA-binding protein, mitochondrial precursor"	5.95259	3.76316
ASHGA5P002106	0.0326849	0.0834241	4.56087	up	protein_coding	ENST00000253108	CCDS12227.1	EIF3G	GENCODE	1127	chr19	-	10225689	10230599	ACCTGGCTAAGGACAAGACCACTGGCCAATCCAAGGGCTTTGCCTTCATCAGCTTCCACC	8666	"eukaryotic translation initiation factor 3, subunit G [Source:HGNC Symbol;Acc:3274]"	6.46954	4.28023
ASHGA5P051698	0.00143612	0.0134591	4.54733	up	protein_coding	NM_004267	CCDS3129.1	CHST2	RefSeq	4154	chr3	+	142838617	142842856	CCGTCTCTAAAAGGGGTTCCCAGGAGACCTGATTCCCTGTGGTGATACCTATAAAGAGGA	9435	carbohydrate sulfotransferase 2	6.72895	4.54393
ASHGA5P009008	0.000965581	0.0107501	4.54354	up	protein_coding	ENST00000349893	CCDS12389.1	COPE	GENCODE	978	chr19	-	19010322	19030199	CCTGGCCACGGATAGTGGCTACCCAGAGACGCTGGTCAACCTCATCGTCCTGTCCCAGCA	11316	"coatomer protein complex, subunit epsilon [Source:HGNC Symbol;Acc:2234]"	5.12754	2.94373
ASHGA5P003687	0.00369593	0.0231268	4.53851	up	protein_coding	NM_152398	CCDS3485.1	OCIAD2	RefSeq	659	chr4	-	48887404	48908815	AATTCTAGATTTGGATCATTGCCCAAAGTTGCACGCACTGCCTCCTTACCTGTGAGGAAT	132299	OCIA domain-containing protein 2 isoform 2	7.50357	5.32135
ASHGA5P001236	0.0169004	0.0568767	4.52734	up	protein_coding	NM_000606	CCDS7017.1	C8G	RefSeq	888	chr9	+	139839697	139841426	AAGCTCTACGCCCGCTCGCTCCCTGTGAGCGACTCGGTCCTGAGTGGGTTTGAGCAGCGG	733	complement component C8 gamma chain precursor	5.31346	3.13479
ASHGA5P014022	0.00989995	0.04082	4.52601	up	protein_coding	ENST00000398733	CCDS43369.1	UBE2D2	GENCODE	2702	chr5	+	138940750	139008018	AATCCACAAGGAATTGAATGATCTGGCACGGGACCCTCCAGCACAGTGTTCAGCAGGTCC	7322	ubiquitin-conjugating enzyme E2D 2 [Source:HGNC Symbol;Acc:12475]	8.58072	6.40248
ASHGA5P051886	0.0113981	0.0447791	4.5172	up	protein_coding	NM_144720	CCDS3385.1	JAKMIP1	RefSeq	2593	chr4	-	6055481	6202318	AGAACTCGAAGTAAGAGACTCTATCTGTTGTAAACTCTCAAACGGAGCAGACATTCTCTT	152789	janus kinase and microtubule-interacting protein 1 isoform 2	6.01641	3.84098
ASHGA5P001237	0.00510972	0.0279403	4.51131	up	protein_coding	NM_003380	CCDS7120.1	VIM	RefSeq	2151	chr10	+	17270257	17279592	AACCTGAGGGAAACTAATCTGGATTCACTCCCTCTGGTTGATACCCACTCAAAAAGGACA	7431	vimentin	8.77165	6.59811
ASHGA5P050201	0.0181881	0.0594425	4.49741	up	protein_coding	NM_019088	CCDS12533.1	PAF1	RefSeq	2320	chr19	-	39876269	39881835	TCTTTGGCAGTGATGCTGATTCTGAGGACGATGCCGACTCTGATGATGAGGACAGAGGAC	54623	RNA polymerase II-associated factor 1 homolog isoform 1	6.44429	4.2752
ASHGA5P008787	0.0077354	0.0350141	4.48531	up	protein_coding	NM_021709	CCDS9993.1	SIVA1	RefSeq	595	chr14	+	105219469	105225996	TCGCAGGAGGTCTTCGACCCATCTGGGGTAGCGTCCATTGCCTGTTCCTCATGCGTGCGA	10572	apoptosis regulatory protein Siva isoform 2	5.68609	3.52089
ASHGA5P036856	0.00161915	0.0144687	4.47612	up	protein_coding	ENST00000543500	CCDS54476.1	MTRNR2L3	GENCODE	1383	chr20	-	55933495	55934878	GATGCCATCCCAGTCTCTTAAATCATCACACATCCTACCCAAGAACAGGGTTTGTTAAGA	100462983	MT-RNR2-like 3 [Source:HGNC Symbol;Acc:37157]	7.66528	5.50303
ASHGA5P025247	0.0275658	0.0758955	4.4566	up	protein_coding	NM_014670		BZW1	RefSeq	3195	chr2	+	201676268	201688569	GAAAAAAAACAACATTCATTTCATGAAAGCCTTCCAGAAAATAGTGGTGCTTTTTTATAA	9689	basic leucine zipper and W2 domain-containing protein 1 isoform 4	6.20072	4.04478
ASHGA5P004923	5.769e-08	2.1766e-05	4.45071	up	protein_coding	NM_013274	CCDS7513.1	POLL	RefSeq	2741	chr10	-	103338638	103348027	AATGCCCTCAAGAGCTTCCATAAGCCTGTCACCTCGTACCAGGAGGCCTGCAGTATCCCT	27343	DNA polymerase lambda isoform a	5.80498	3.65094
ASHGA5P006105	0.0239976	0.0704708	4.44497	up	protein_coding	NM_004604	CCDS10700.1	STX4	RefSeq	1403	chr16	+	31044902	31051485	TTGGATAATGTCGCACATTGTTGGCACTAGGAGCACCAGGAACCCAGGGCCTGGCCTTCT	6810	syntaxin-4	6.46312	4.31094
ASHGA5P006224	0.00341513	0.0221169	4.44191	up	protein_coding	NM_032205	CCDS6369.2	PHF20L1	RefSeq	2286	chr8	+	133787603	133837587	ACAGCATTTGGTATCAGGAGTTGGGATTTCTCAGCACTGCTAATGAAGATCCCCTCTTAT	51105	PHD finger protein 20-like protein 1 isoform 2	7.32505	5.17387
ASHGA5P005934	0.0164144	0.0558515	4.43709	up	protein_coding	NM_015247	CCDS45482.1	CYLD	RefSeq	8730	chr16	+	50775960	50835846	GATCGGGATGGTGGTCAGAATGGCTTCAACATTCCTCAAGTCACCCCATGCCCAGAAGTA	1540	ubiquitin carboxyl-terminal hydrolase CYLD isoform 1	7.11367	4.96405
ASHGA5P012912	0.000646788	0.00880855	4.43573	up	protein_coding	NM_001166118	CCDS55101.1	NT5C3	RefSeq	1932	chr7	-	33053724	33080777	TTTGCCTGAGATGCCAGAATTCCAGAAAAGTTCAGTTCGAATCAAGAACCCTACAAGAGT	51251	cytosolic 5'-nucleotidase 3 isoform 3	5.03035	2.88118
ASHGA5P014033	0.01705	0.0571533	4.43041	up	protein_coding	NM_001134493	CCDS47424.1	TOMM6	RefSeq	881	chr6	+	41755180	41757634	AGCCAAGTAGTTCTAATGCCACCTGTCGTCTTATCATCTGATTGCAGACAAATGGAATCC	100188893	mitochondrial import receptor subunit TOM6 homolog	6.50692	4.35948
ASHGA5P011004	0.031296	0.0811846	4.39745	up	protein_coding	NM_005621	CCDS1037.1	S100A12	RefSeq	466	chr1	-	153346183	153348075	TGTGCATTGAGGGGTTAACATTAGGCTGGGAAGATGACAAAACTTGAAGAGCATCTGGAG	6283	protein S100-A12	6.44808	4.31141
ASHGA5P003046	0.00863979	0.0375538	4.37752	up	protein_coding	ENST00000264265	CCDS3183.1	LXN	GENCODE	1116	chr3	-	158384202	158390482	TATAGCATCTCAGGAGATTATTCCCTGGCAAATGCAAGTTCTCTGGCATCCACAATACGG	56925	latexin [Source:HGNC Symbol;Acc:13347]	6.94844	4.81832
ASHGA5P009649	0.000557926	0.00817293	4.37588	up	protein_coding	NM_006321	CCDS2780.1	ARIH2	RefSeq	4081	chr3	+	48956280	49022971	TCTTGGCCAAGTGTCGATACACCCTGCAATACACCTACCCATATGCATATTACATGGAGT	10425	E3 ubiquitin-protein ligase ARIH2	5.15717	3.02759
ASHGA5P010715	4.15673e-06	0.000449568	4.37564	up	protein_coding	NM_001136224	CCDS44313.1	RCOR3	RefSeq	4232	chr1	+	211432707	211489725	ATTAATGCCCGTTGGACCACAGAGGAGCAGCTTCTAGCAGTGCAAGGCACAGACCCCACA	55758	REST corepressor 3 isoform b	4.85735	2.72785
ASHGA5P013914	0.00557109	0.0291338	4.36732	up	protein_coding	NM_178584	CCDS42726.1	SEPT10	RefSeq	3187	chr2	-	110300373	110371783	GCGGCACCTGAAAAGAGAAAACATTCGTTCGTTGACTATGTCTGGCCATGTTGGTTTTGA	151011	septin-10 isoform 2	7.44219	5.31544
ASHGA5P009468	0.00472871	0.0267345	4.35051	up	protein_coding	NM_001003796	CCDS33653.1	NHP2L1	RefSeq	1520	chr22	-	42069936	42084913	CGCAGCCATGACTGAGGCTGATGTGAATCCAAAGGCCTATCCCCTTGCCGATGCCCACCT	4809	NHP2-like protein 1	8.04199	5.92081
ASHGA5P043215	0.0256886	0.0730022	4.34984	up	protein_coding	NM_032164	CCDS5666.1	ZNF394	RefSeq	2259	chr7	-	99090853	99097877	GGGAAAGATTTAGACAAAGTACACACCTTATCCGACACCAAAGAATTCATCAAAATAAAG	84124	zinc finger protein 394	6.44867	4.32771
ASHGA5P001157	0.0395606	0.0923867	4.3497	up	protein_coding	ENST00000221978	CCDS12830.1	NKG7	GENCODE	826	chr19	-	51874873	51875960	ATCATATCAGGCTACATCCACGTGACGCAGACCTTCAGCATTATGGCTGTTCTGTGGGCC	4818	natural killer cell group 7 sequence [Source:HGNC Symbol;Acc:7830]	5.54896	3.42804
ASHGA5P001150	3.4931e-05	0.0015539	4.34827	up	protein_coding	NM_006233	CCDS12487.1	POLR2I	RefSeq	885	chr19	-	36604610	36606206	ACCACCCGTGCCAAAAGTGCGGCCACAAGGAGGCTGTGTTCTTCCAGTCACACAGTGCGC	5438	DNA-directed RNA polymerase II subunit RPB9	7.46786	5.34741
ASHGA5P009062	0.0262546	0.0738622	4.33167	up	protein_coding	NM_201436	CCDS5497.1	H2AFV	RefSeq	1351	chr7	-	44873212	44887725	CGAGAACATGTTTCCTGTGGGCCGCATCCACAGACACTTGAAGACTCGCACCACAAGCCA	94239	histone H2A.V isoform 3	5.61765	3.50273
ASHGA5P012593	0.0252756	0.0724224	4.32949	up	protein_coding	NM_030948		PHACTR1	RefSeq	2896	chr6	+	12717036	13288075	ACTTAACAAGGTTTCACCGACCTTAACAGTCGAATTCCTCTTGAGTGCTATGCTGTCTTC	221692	phosphatase and actin regulator 1	5.7797	3.6655
ASHGA5P001972	0.01772	0.0584944	4.32265	up	protein_coding	NM_001344	CCDS9571.1	DAD1	RefSeq	711	chr14	-	23033806	23058143	TTCATCCTAGCGGTTTGCCTGAGAATACAGATCAACCCACAGAACAAAGCGGATTTCCAA	1603	dolichyl-diphosphooligosaccharide--protein glycosyltransferase subunit DAD1	6.90794	4.79603
ASHGA5P028445	0.00626409	0.031049	4.30962	up	protein_coding	NM_182488	CCDS31952.1	USP12	RefSeq	4503	chr13	-	27640286	27746033	GGCGCTGGCCGGATGGAAATCCTAATGACAGTCTCCAAATTCGCCTCCATCTGTACCATG	219333	ubiquitin carboxyl-terminal hydrolase 12	6.4803	4.37274
ASHGA5P019361	0.000746094	0.00939996	4.30742	up	protein_coding	NM_014719	CCDS5886.1	FAM115A	RefSeq	5682	chr7	-	143548460	143599172	TGGGCCCCGGAAACCAATAGAGCCATGGCGACTCCCTCTGCTGCCTTCGAGGCCCTTATG	9747	protein FAM115A isoform 1	5.98482	3.87799
ASHGA5P003569	0.0369677	0.0889233	4.30473	up	protein_coding	NM_031286	CCDS278.1	SH3BGRL3	RefSeq	1131	chr1	+	26606212	26608013	GTACTGTGGGGACTATGAGCTCTTCGTGGAGGCTGTGGAACAAAACACGCTGCAGGAGTT	83442	SH3 domain-binding glutamic acid-rich-like protein 3	5.83307	3.72715
ASHGA5P010714	0.00717281	0.033472	4.30103	up	protein_coding	NM_001136223	CCDS44312.1	RCOR3	RefSeq	4474	chr1	+	211432707	211489725	TTCTAATGTGCCATCAGGGAAGAGCACTGATGAAGAAGAGGAGGCACAGACCCCACAGGC	55758	REST corepressor 3 isoform a	5.76371	3.65902
ASHGA5P003228	0.0336256	0.0845163	4.29683	up	protein_coding	NM_002413	CCDS3749.1	MGST2	RefSeq	817	chr4	+	140586921	140625406	GAGAGAGTATTTCGGGCACAACAAAACTGTGTGGAGTTTTATCCTATATTCATAATTACA	4258	microsomal glutathione S-transferase 2 isoform 1 precursor	5.66206	3.55878
ASHGA5P007721	0.0010621	0.0112784	4.29334	up	protein_coding	NM_033082	CCDS8892.1	SARNP	RefSeq	941	chr12	-	56151053	56211540	AGATGAAACAGAGGAAGAAGAAACAAAGCCCATTGAGCTCCCTGTCAAAGAGGAAGAACC	84324	SAP domain-containing ribonucleoprotein	5.3374	3.2353
ASHGA5P032760	9.97344e-06	0.0007062	4.28292	up	protein_coding	ENST00000304094	CCDS11022.1	OR1A1	GENCODE	930	chr17	+	3118914	3119844	ATTTCCGCCCTTTGACCAATTATAGCCTAAAAGACGCAGTGATCACTGTAATGTACACGG	8383	"olfactory receptor, family 1, subfamily A, member 1 [Source:HGNC Symbol;Acc:8179]"	5.51697	3.41838
ASHGA5P003144	0.000354355	0.00618119	4.27026	up	protein_coding	ENST00000264933	CCDS3854.1	PDCD6	GENCODE	1135	chr5	+	271735	315089	TCAGGTTTCGGCTACCGGCTCTCTGACCAGTTCCACGACATCCTCATTCGAAAGTTTGAC	10016	programmed cell death 6 [Source:HGNC Symbol;Acc:8765]	5.98986	3.89554
ASHGA5P012397	0.0168946	0.0568767	4.26473	up	protein_coding	NM_024808	CCDS9446.1	BORA	RefSeq	2803	chr13	+	73302041	73330328	TAATATGAAGCAAGACCACACAACACAGAGGTGTTGGATGAAAACAGCAAGCCCTTTTCA	79866	protein aurora borealis	5.61395	3.52149
ASHGA5P026516	0.0251719	0.0722938	4.26273	up	protein_coding	NM_002228	CCDS610.1	JUN	RefSeq	3338	chr1	-	59246462	59249785	CTTCCAATTTGGAATCTTCTCTTTGACAATTCCTAGATAAAAAGATGGCCTTTGCTTATG	3725	transcription factor AP-1	7.85214	5.76037
ASHGA5P006543	0.00922005	0.0391513	4.25657	up	protein_coding	ENST00000319942	CCDS669.1	RABGGTB	GENCODE	1496	chr1	+	76251885	76260764	GCCGGAGAAGTTACCAGATGTATGCTACTCATGGTGGGTCCTGGCTTCCCTAAAGATAAT	5876	"Rab geranylgeranyltransferase, beta subunit [Source:HGNC Symbol;Acc:9796]"	8.5571	6.4674
ASHGA5P028514	0.0016164	0.0144568	4.24726	up	protein_coding	NM_172373	CCDS9374.1	ELF1	RefSeq	3760	chr13	-	41506054	41593508	ATATATTTAGTTCACCTGAAGATGACATGGTTGTTGCCCCAGTCACCCATGTGTCCGTCA	1997	ETS-related transcription factor Elf-1 isoform a	6.83044	4.7439
ASHGA5P029574	0.00207521	0.0166327	4.24083	up	protein_coding	NM_002892	CCDS9732.1	ARID4A	RefSeq	5792	chr14	+	58765221	58840451	AACACAGAGAAAAACATCCGAATTCATCCCCTAGGACATATAAATGGAGCTTTCAGCTCA	5926	AT-rich interactive domain-containing protein 4A isoform I	6.16009	4.07574
ASHGA5P002614	0.0161489	0.0553156	4.2365	up	protein_coding	NM_018364	CCDS862.1	RSBN1	RefSeq	6604	chr1	-	114304453	114355070	TTGAAACAACCACCATTTCAAATTTTCACACTCAGGTCAACAGGACATACTGCTGTGGCA	54665	round spermatid basic protein 1	5.65721	3.57434
ASHGA5P001798	0.0346871	0.0859332	4.23125	up	protein_coding	NM_001081450	CCDS46175.1	LILRB3	RefSeq	2843	chr19	-	54720146	54726959	GAAAACCTCTATGCTGCCGTGAAGGACACACAGTCTGAGGACAGGGTGGAGCTGGACAGT	11025	leukocyte immunoglobulin-like receptor subfamily B member 3 isoform 1 precursor	5.73433	3.65324
ASHGA5P056107	0.00939516	0.0395965	4.22556	up	protein_coding	NM_004755	CCDS9893.1	RPS6KA5	RefSeq	3883	chr14	-	91337166	91526993	AGTAGCTTAGGCATGGTAGGAGTGTATCAGTGATCCATTGCACCTTTATTCCCTCAGCAT	9252	ribosomal protein S6 kinase alpha-5 isoform a	5.76893	3.68978
ASHGA5P009595	0.000647429	0.00880855	4.20777	up	protein_coding	NM_016185	CCDS45771.1	HN1	RefSeq	1602	chr17	-	73131343	73150775	AATAGCTCCCGAGTTTTGCGGCCTCCAGGTGGTGGATCCAATTTTTCATTAGGTTTTGAT	51155	hematological and neurological expressed 1 protein isoform 1	6.39829	4.32523
ASHGA5P005270	0.0425437	0.0964596	4.20403	up	protein_coding	NM_015702	CCDS2189.1	MMADHC	RefSeq	1466	chr2	-	150426146	150444330	CTTAGAAAAGTTCATCAATGGTGCTAAGGAAATTTGCTATGCTCTTCGAGCTGAGGGTTA	27249	"methylmalonic aciduria and homocystinuria type D protein, mitochondrial"	6.02301	3.95124
ASHGA5P006155	0.0277828	0.0761962	4.20201	up	protein_coding	ENST00000314595	CCDS3511.1	POLR2B	GENCODE	3748	chr4	+	57845108	57897334	TGAAGAACCGCCACGATATTTGCTGAAGTTTGAACAAATTTATCTTTCCAAGCCTACCCA	5431	"polymerase (RNA) II (DNA directed) polypeptide B, 140kDa [Source:HGNC Symbol;Acc:9188]"	6.51764	4.44656
ASHGA5P035731	0.00101092	0.010979	4.19731	up	protein_coding	NM_005378	CCDS1687.1	MYCN	RefSeq	2613	chr2	+	16080682	16087129	TCGAGTTTGACTCGCTACAGCCCTGCTTCTACCCGGACGAAGATGACTTCTACTTCGGCG	4613	N-myc proto-oncogene protein	6.33744	4.26797
ASHGA5P016096	0.0241746	0.0708274	4.18947	up	protein_coding	NM_001131063	CCDS47322.1	SAP30L	RefSeq	6105	chr5	+	153825516	153840613	CGACAAGAGCCTGCAGGTGAACACCCTACGACGTTATAAACGACACTACAAGTTGCAGAC	79685	histone deacetylase complex subunit SAP30L isoform 3	6.61801	4.55124
ASHGA5P017426	0.018645	0.0601947	4.18476	up	protein_coding	NM_001142386	CCDS48088.1	PDK3	RefSeq	12795	chrX	+	24483343	24568583	AAGCAAAACAAGACAAGATCAAGACTAATAGAACTTTCTAGAGGACTGAATGCTGTGGTC	5165	"pyruvate dehydrogenase kinase, isozyme 3 isoform 1"	5.44822	3.38308
ASHGA5P035492	0.0134062	0.0493742	4.17541	up	protein_coding	NM_003151	CCDS2310.1	STAT4	RefSeq	2840	chr2	-	191894301	192015986	TCTCCAAGTGTGTATGCGGTGTTGAGAGAAAACCTGAGTCCCACAACAATTGAAACTGCA	6775	signal transducer and activator of transcription 4	7.25423	5.19231
ASHGA5P010699	0.0480515	0.103178	4.17175	up	protein_coding	NM_020197	CCDS31022.1	SMYD2	RefSeq	1689	chr1	+	214454564	214510477	ATATGGACAGAAAATCATTAAGCCCTACAGTAAGCACTATCCTTTGTACTCCCTCAACGT	56950	N-lysine methyltransferase SMYD2	6.29686	4.23621
ASHGA5P005297	0.0186487	0.0601947	4.16676	up	protein_coding	NM_001002755	CCDS33217.1	NFU1	RefSeq	1104	chr2	-	69623244	69664760	TATCACCCAGTGAGATACATGTTTATTCAAACACAAGATACCCCAAATCCAAACAGCTTA	27247	"NFU1 iron-sulfur cluster scaffold homolog, mitochondrial isoform 2"	5.5522	3.49327
ASHGA5P049790	0.0277882	0.0761962	4.15038	up	protein_coding	ENST00000521764	CCDS11630.1	NACA2	GENCODE	770	chr17	-	59667793	59668563	CCTGCACAAAATGCCGGGCGAAGCCACAGAAACCGTCCCTGCTACAGAGCAGGAGTTGCC	342538	nascent polypeptide-associated complex alpha subunit 2 [Source:HGNC Symbol;Acc:23290]	5.47701	3.42377
ASHGA5P001899	0.000651929	0.00880855	4.14926	up	protein_coding	NM_003407	CCDS12534.1	ZFP36	RefSeq	1752	chr19	+	39897486	39900052	TCATGGCCAACCGTTACACCATGGATCTGACTGCCATCTACGAGAGCCTCCTGTCGCTGA	7538	tristetraprolin	5.26019	3.20734
ASHGA5P010570	0.0206442	0.064201	4.14152	up	protein_coding	NM_181514	CCDS8186.1	MRPL21	RefSeq	713	chr11	-	68658745	68671303	ATCTACCAGGATATGTTCCTAAAACATCCCTGAGTTCACCACCTTGGCCAGAAGTTGTTC	219927	"39S ribosomal protein L21, mitochondrial isoform d"	8.01942	5.96926
ASHGA5P001917	0.0162984	0.0556406	4.14121	up	protein_coding	NM_002872	CCDS13945.1	RAC2	RefSeq	1516	chr22	-	37621309	37640305	TCCTCTAGGGGTTGCACCCCAGCGCTCCCACCTAGATGGGTCTGATCCTCCAGGATCCCC	5880	ras-related C3 botulinum toxin substrate 2	6.1397	4.08965
ASHGA5P006269	0.0134025	0.0493742	4.13507	up	protein_coding	NM_182491	CCDS5323.1	ZFAND2A	RefSeq	907	chr7	-	1192542	1199855	ATAAGTGTCCGTTTGCATTCCAGAAGGATGTTCACGTCCCAGTATGCCCACTCTGTAATA	90637	AN1-type zinc finger protein 2A	6.79399	4.74608
ASHGA5P017259	0.00236767	0.0178663	4.13284	up	protein_coding	NM_174893	CCDS32542.1	C17orf49	RefSeq	909	chr17	+	6918055	6920843	AAACTCAACTTCGACCAGGCCTGACCCTGGATTCTGGCCTTCTCATGACCTCTGCTGATC	124944	chromatin complexes subunit BAP18 isoform 2	7.95765	5.91052
ASHGA5P003301	0.0183525	0.059769	4.13068	up	protein_coding	NM_016422	CCDS7803.1	RNF141	RefSeq	4084	chr11	-	10533224	10562774	TTGATAAATGGAGTGATCGACACAGGAATTGCCCTATTTGTCGCCTACAGATGACTGGAG	50862	RING finger protein 141	5.51827	3.47189
ASHGA5P001611	0.038049	0.0905196	4.13024	up	protein_coding	NM_017657	CCDS1878.1	AFTPH	RefSeq	4054	chr2	+	64751438	64820138	CCTTTAGATGGTGTGGATCCGGAGTTGTATGAGTTAACAACTTCTAAGCTGGAAATCTCC	54812	aftiphilin isoform b	6.8575	4.81127
ASHGA5P032360	0.0161273	0.0552602	4.12562	up	protein_coding	NM_021006	CCDS11310.1	CCL3L1	RefSeq	804	chr17	-	34623841	34625730	TTTTGTTCAGGGCTGTGATCGGCCTGGGGAAATAATAAAGATGTTCTTTTAAACGGTAAA	6349	C-C motif chemokine 3-like 1 precursor	10.1127	8.06813
ASHGA5P013555	0.00775883	0.0350817	4.11045	up	protein_coding	NM_138448	CCDS1850.1	ACYP2	RefSeq	1238	chr2	+	54342409	54532435	TCAATTCCATGAAGTCCTGGCTGAGCAAGGTTGGAAGCCCTAGTTCTCGCATTGACCGCA	98	acylphosphatase-2	6.5878	4.5485
ASHGA5P005970	0.00133168	0.0129099	4.09535	up	protein_coding	NM_175728	CCDS2560.1	IL5RA	RefSeq	1653	chr3	-	3131856	3152058	ATTTATGTGGGGTTCTCAAGATAAAGGAGATAACATCCAGCTTTCCTGCCCCACACCGTA	3568	interleukin-5 receptor subunit alpha isoform 3 precursor	6.58554	4.55155
ASHGA5P014451	0.0228466	0.0683572	4.0918	up	protein_coding	NM_001135188	CCDS46534.1	AGFG1	RefSeq	8678	chr2	+	228336887	228425938	CAGCCCAATGGTTTTGCAGCATTTGGACAAACAAAGCCAGTAGTAACCCCTTTTGGTCAA	3267	arf-GAP domain and FG repeat-containing protein 1 isoform 3	6.24266	4.20993
ASHGA5P011250	0.0110751	0.0438584	4.08753	up	protein_coding	NM_016040	CCDS743.1	TMED5	RefSeq	6083	chr1	-	93615298	93646246	AGACATCCTGGAATCCATCAACAGCATCAAGTCCAGACTAAGCAAAAGTGGGCACATACA	50999	transmembrane emp24 domain-containing protein 5 isoform 1 precursor	5.76372	3.73249
ASHGA5P003058	0.0175839	0.0581919	4.08401	up	protein_coding	NM_016129	CCDS3600.1	COPS4	RefSeq	1765	chr4	+	83956238	83996971	CATTTTGAAACACGAGAAGCCCTGCCAACGTGGGATAAGCAGATCCAATCACTTTGTTTC	51138	COP9 signalosome complex subunit 4 isoform 1	5.59453	3.56454
ASHGA5P003668	0.000151172	0.00367239	4.05674	up	protein_coding	NM_014255	CCDS8914.1	CNPY2	RefSeq	1247	chr12	-	56704212	56710128	TTTGCAGTAAGCGAACAGATCTTTGTGACCATGCCCTGCACATATCGCATGATGAGCTAT	10330	protein canopy homolog 2 isoform 1 precursor	8.04135	6.02103
ASHGA5P055627	0.00592217	0.0300594	4.05561	up	protein_coding	NM_002534	CCDS44980.1	OAS1	RefSeq	1470	chr12	+	113344738	113355831	TAAGAATTGGGATGGGTCCCCAGTGAGCTCCTGGATTCTGCTGGTGAGACCTCCTGCTTC	4938	2'-5'-oligoadenylate synthase 1 isoform 2	5.81091	3.79099
ASHGA5P005387	0.0192071	0.0612414	4.05521	up	protein_coding	NM_001002033	CCDS45772.1	HN1	RefSeq	1696	chr17	-	73131343	73150774	AACTCCTCTGAAGCAAGCTCCGGAGACTTCTTAGATCTGAAGGGAGAAGGTGATATTCAT	51155	hematological and neurological expressed 1 protein isoform 3	6.29059	4.27082
ASHGA5P054127	0.0124893	0.047385	4.05216	up	protein_coding	NM_001166599	CCDS55497.1	FAM122B	RefSeq	4277	chrX	-	133903595	133931185	GGATGATCTCTCACCCAAGTGACTTAACCATTTCTGATTCAACGTTTTAACTGCTGTTTC	159090	protein FAM122B isoform 2	5.16045	3.14176
ASHGA5P000909	0.00766108	0.0347942	4.04927	up	protein_coding	NM_005008	CCDS14022.1	NHP2L1	RefSeq	1752	chr22	-	42069936	42084913	AGACGCTATGACTGAGGCTGATGTGAATCCAAAGGCCTATCCCCTTGCCGATGCCCACCT	4809	NHP2-like protein 1	8.19077	6.17311
ASHGA5P010935	0.0046181	0.026439	4.04789	up	protein_coding	NM_144772	CCDS1145.1	APOA1BP	RefSeq	1121	chr1	+	156561557	156564091	GCCCGCAGAGCCCATGACGATTGATGAACTGTATGAGCTGGTGGTGGATGCCATCTTTGG	128240	NAD(P)H-hydrate epimerase precursor	6.14643	4.12926
ASHGA5P002189	0.0039952	0.024327	4.03431	up	protein_coding	NM_005455	CCDS660.1	ZRANB2	RefSeq	3162	chr1	-	71528973	71546972	GTCACCCGAAAGCCAGGTGATTGGTGAAAACACTAAACAACCCTGAGCCCAGGGCCAACC	9406	zinc finger Ran-binding domain-containing protein 2 isoform 2	7.63456	5.62224
ASHGA5P005303	0.0356681	0.0872605	4.0299	up	protein_coding	NM_205840	CCDS54986.1	LST1	RefSeq	609	chr6	+	31554976	31556686	CATCGAAGAGGCCCAGGGCTCCTCAGAGCAGGAACTCCACTATGCATCTCTGCAGAGGCT	7940	leukocyte-specific transcript 1 protein isoform 5	6.27061	4.25987
ASHGA5P006354	3.76543e-05	0.00164628	4.02791	up	protein_coding	NM_031472	CCDS44639.1	TRPT1	RefSeq	987	chr11	-	63991270	63993726	AACCAGGGCCATTCCCTGCAGGTACCTAAGTTGGAGCTGATGCCCCTGGAGACACCGCAG	83707	tRNA 2'-phosphotransferase 1 isoform 2	4.70373	2.6937
ASHGA5P000640	0.0236783	0.0698758	4.02733	up	protein_coding	NM_004075	CCDS9112.1	CRY1	RefSeq	3273	chr12	-	107385142	107487598	CACTAATTAGAAAACATTCAGGAGGAATACTGTTGCAGCTGAAATTGGTGGGGAGTTCAA	1407	cryptochrome-1	6.35246	4.34263
ASHGA5P038002	0.000199743	0.00432932	4.02697	up	protein_coding	NM_000026	CCDS14001.1	ADSL	RefSeq	1565	chr22	+	40742503	40762575	TGATGCCTACTTCAGTCCCATTCACTCCCAGTTGGATCATTTACTGGATCCTTCTTCTTT	158	adenylosuccinate lyase isoform a	9.45688	7.44718
ASHGA5P054554	0.000361807	0.00627892	4.02522	up	protein_coding	NM_182639	CCDS7476.1	HPS1	RefSeq	1627	chr10	-	100188902	100206704	TTCCCCTGGCGATCAGAGCTCAGGTGAGGACCGGAGGAAAGCAGGAGGAAACAATAGCTA	3257	Hermansky-Pudlak syndrome 1 protein isoform c	5.6071	3.59804
ASHGA5P055050	0.0151831	0.0532427	4.02354	up	protein_coding	NM_145018	CCDS8263.1	C11orf82	RefSeq	3577	chr11	+	82612736	82645699	GTCACCTGAATTGTTTTCATAAAAAGTCACCTGAACCCAATTCCTGAACTTTTAAATCTG	220042	nitric oxide-inducible gene protein	7.5256	5.51713
ASHGA5P010730	0.00946825	0.0396786	4.02279	up	protein_coding	NM_032960	CCDS31001.1	MAPKAPK2	RefSeq	2997	chr1	+	206858364	206907630	GGATGTCAAGGAGGAGATGACCAGTGCCTTGGCCACAATGCGCGTTGACTACGAGCAGAT	9261	MAP kinase-activated protein kinase 2 isoform 2	7.26485	5.25665
ASHGA5P005726	2.3e-10	2.343e-06	4.02121	up	protein_coding	NM_012212	CCDS6779.1	PTGR1	RefSeq	1249	chr9	-	114325246	114361711	GGGACACCCGGAGCTTCAGGATGGTTCGTACTAAGACATGGACCCTGAAGAAGCACTTTG	22949	prostaglandin reductase 1 isoform 1	4.4888	2.48117
ASHGA5P001497	0.000151549	0.00367239	4.0195	up	protein_coding	NM_024407	CCDS12063.1	NDUFS7	RefSeq	799	chr19	+	1383882	1395588	TACATCCCAGGCTGCCCACCTACGGCCGAGGCCCTGCTCTACGGCATCCTGCAGCTGCAG	374291	"NADH dehydrogenase [ubiquinone] iron-sulfur protein 7, mitochondrial"	7.2345	5.22749
ASHGA5P013402	0.0032581	0.0215521	4.017	up	protein_coding	NM_024684	CCDS8254.1	C11orf67	RefSeq	557	chr11	+	77532207	77583398	AGTGCGGTGGACTTCAGTGAAGTTCCTTATGACTTCCCCTGAAATTGCTTCCTTATCATG	28971	UPF0366 protein C11orf67	5.05138	3.04526
ASHGA5P014048	0.0091381	0.0389009	4.01313	up	protein_coding	NM_003965	CCDS43079.1	CCRL2	RefSeq	1745	chr3	+	46448720	46451014	CAGCCCAGTGGGCAGTCTGAAGATGGCCAATTACACGCTGGCACCAGAGGATGAATATGA	9034	C-C chemokine receptor-like 2 isoform 1	5.74725	3.74252
ASHGA5P013300	0.0128829	0.0482492	4.00588	up	protein_coding	NM_001037494	CCDS9200.1	DYNLL1	RefSeq	820	chr12	+	120907659	120936298	CCCACCTCAGGTAACCATGTGCGACCGAAAGGCCGTGATCAAAAATGCGGACATGTCGGA	8655	"dynein light chain 1, cytoplasmic"	6.65517	4.65305
ASHGA5P046735	0.0114039	0.0447847	3.99513	up	protein_coding	NM_001636	CCDS14114.1	SLC25A6	RefSeq	1502	chrY	-	1455044	1461039	CGGCCGTGGCCGGCGTGGTGTCCTACCCCTTCGACACGGTGCGGCGGCGCATGATGATGC	293	ADP/ATP translocase 3	7.25692	5.25868
ASHGA5P005036	0.0243469	0.0710014	3.99275	up	protein_coding	NM_014685	CCDS10771.1	HERPUD1	RefSeq	2198	chr16	+	56965747	56977793	AATGTGAAGAGTCCTTCAAAAATGCCAGAAATCAACGCCAAGGTGGCTGAATCCACAGAG	9709	homocysteine-responsive endoplasmic reticulum-resident ubiquitin-like domain member 1 protein isoform 1	5.75815	3.76076
ASHGA5P012237	0.0417337	0.0953659	3.98333	up	protein_coding	NM_005516	CCDS34379.1	HLA-E	RefSeq	2679	chr6	+	30457182	30461982	GCTTGTAAAGCCTGAGACAGCTGCCTTGTGTGCGACTGAGATGCACAGCTGCCTTGTGTG	3133	"HLA class I histocompatibility antigen, alpha chain E precursor"	8.11527	6.12129
ASHGA5P006771	0.0114841	0.0449215	3.98278	up	protein_coding	NM_007069	CCDS8047.1	PLA2G16	RefSeq	1395	chr11	-	63341943	63381909	TGCGCCCATTCCAGAGCCTAAGCCTGGAGACCTGATTGAGATTTTTCGCCCTTTCTACAG	11145	group XVI phospholipase A1/A2	5.25764	3.26387
ASHGA5P050716	0.000227252	0.00471479	3.98179	up	protein_coding	NM_194247	CCDS2273.1	HNRNPA3	RefSeq	5808	chr2	+	178077421	178088685	TGATTTGCAGGTTGAATGAGAACCCTACTTGCCTAAATGAGGAATGTCTTTCCTACCATC	220988	heterogeneous nuclear ribonucleoprotein A3	6.58864	4.59523
ASHGA5P015517	0.00169117	0.0148069	3.97322	up	protein_coding	NM_001082969	CCDS8356.2	C11orf57	RefSeq	3199	chr11	+	111944967	111955874	GCGGCGCACGATTGAAGAATGTCCCGGATTCCACTGGGGAAGGTCCTCCTGAGGAATGTC	55216	uncharacterized protein C11orf57 isoform a	5.36307	3.37276
ASHGA5P015467	0.00304254	0.0206905	3.96989	up	protein_coding	NM_001190942	CCDS54680.1	TNFSF10	RefSeq	1805	chr3	-	172223297	172241297	CGTTAGAAAGACTCCAAGAATGAAAAGGCTCTGGGCCGCAAAATAAACTCCTGGGAATCA	8743	tumor necrosis factor ligand superfamily member 10 isoform 2	5.60431	3.61522
ASHGA5P008141	0.000899963	0.0103242	3.96756	up	protein_coding	ENST00000340313	CCDS31608.1	KCNK7	GENCODE	1298	chr11	-	65360325	65363467	GCACTTCTTGGTTACTTGCTTCTAGGACTCTTGGCCATGCTGCTGGCAGTGGAGACCTTC	10089	"potassium channel, subfamily K, member 7 [Source:HGNC Symbol;Acc:6282]"	4.78933	2.80108
ASHGA5P010893	0.00130829	0.0127821	3.96352	up	protein_coding	ENST00000368046	CCDS1208.1	CD48	GENCODE	1126	chr1	-	160648535	160681641	TGTACCCTGGCCCGGTCCTTTGGAGTAGAATGGATTGCAAGTTGGCTAGTGGTCACGGTG	962	CD48 molecule [Source:HGNC Symbol;Acc:1683]	10.4884	8.5016
ASHGA5P005879	0.0271817	0.0754085	3.9609	up	protein_coding	NM_016050	CCDS8139.1	MRPL11	RefSeq	1610	chr11	-	66202549	66206310	TGGTGAAGGACCTCAGTTCAGAAGAGCTTGCAGCTTTCCAGAAGGAACGAGCCATCTTCC	65003	"39S ribosomal protein L11, mitochondrial isoform a"	5.87344	3.88761
ASHGA5P049103	0.000167749	0.0039194	3.95649	up	protein_coding	NM_202000	CCDS45435.1	ACSM3	RefSeq	1587	chr16	+	20775311	20797638	CGATGTTAAGGTTTGCACATCCCCTTCCAGGAGAATGTTTAACAACCCAATCTGTACACT	6296	"acyl-coenzyme A synthetase ACSM3, mitochondrial isoform 2"	5.69107	3.70684
ASHGA5P012543	0.00839477	0.0368147	3.95615	up	protein_coding	NM_203391	CCDS14225.1	GK	RefSeq	4503	chrX	+	30671475	30749577	CCAGAAAGTGGTATTCCATAAAACCTACCAACTCATGGATTCCCAAGATGTGAGCTTTTT	2710	glycerol kinase isoform a	5.15889	3.17479
ASHGA5P000717	0.0109354	0.0434981	3.94938	up	protein_coding	NM_014716	CCDS11101.1	ACAP1	RefSeq	2523	chr17	+	7239847	7254793	ATCGCCATGGAAACAGCCAACGCTGACATCGTCACCCTGCTACGACTGGCAAAGATGAGG	9744	"arf-GAP with coiled-coil, ANK repeat and PH domain-containing protein 1"	6.79101	4.80938
ASHGA5P053382	0.0320904	0.0823853	3.94484	up	protein_coding	NM_005662	CCDS6131.1	VDAC3	RefSeq	1554	chr8	+	42249278	42263455	ACTTTATCAGCTTTAATCGATGGGAAGAACTTCAGTGCAGGAGGTCACAAGGTTGGCTTG	7419	voltage-dependent anion-selective channel protein 3 isoform 1	6.26627	4.2863
ASHGA5P046629	0.00891804	0.0382679	3.94295	up	protein_coding	NM_144658	CCDS35373.1	DOCK11	RefSeq	6638	chrX	+	117629871	117820123	ATTGGCACGTGGTAAACTACAAGTATGAGGACTTCTCTGGGGACTTTCGAATGTTGCCAT	139818	dedicator of cytokinesis protein 11	6.36784	4.38856
ASHGA5P003211	0.00250232	0.0184585	3.93648	up	protein_coding	NM_003873	CCDS7177.1	NRP1	RefSeq	5895	chr10	-	33466418	33623833	AGTGGAACAGGTGATGACTTCCAGCTCACAGGTGGCACCACTGTGCTGGCCACAGAAAAG	8829	neuropilin-1 isoform a precursor	5.23653	3.25962
ASHGA5P014562	0.0088365	0.0380386	3.93586	up	protein_coding	NM_001130716	CCDS3601.1	PLAC8	RefSeq	1442	chr4	-	84011210	84031012	AGAGCGGGCAGAGAAGTCCACTGCTTTTAAGGCCCTGCACTGAAAATGCAAGCTCAGGCG	51316	placenta-specific gene 8 protein	6.08879	4.11211
ASHGA5P047991	0.0020736	0.0166327	3.93032	up	protein_coding	NM_148893	CCDS41627.1	SVIP	RefSeq	1405	chr11	-	22843597	22851382	TCAGGGTTCTCAAGCTGTCGTCCCTATGGGGCTGTGTTTTCCTTGTCCCGGGGAGTCCGC	258010	small VCP/p97-interacting protein	6.93735	4.9627
ASHGA5P001149	0.0381978	0.0906507	3.91728	up	protein_coding	NM_001281	CCDS12488.1	TBCB	RefSeq	1475	chr19	+	36605887	36616849	ATGTATGTAGGTCTCACAGATTTCAAGCCTGGCTACTGGATTGGTGTCCGCTATGATGAG	1155	tubulin-folding cofactor B	6.08894	4.11908
ASHGA5P048058	0.00854556	0.037314	3.91469	up	protein_coding	NM_004813	CCDS31472.1	PEX16	RefSeq	1929	chr11	-	45931219	45939674	ACCTGGCAGAAAATCTACTTCTACAGTTGGGGCTGACAGACCTCCCGGAAGGAGGGTGTG	9409	peroxisomal biogenesis factor 16 isoform 1	6.6254	4.6565
ASHGA5P008909	0.00437095	0.0257299	3.89779	up	protein_coding	NM_015966	CCDS13257.1	ERGIC3	RefSeq	1368	chr20	+	34129777	34145405	AAGAGCTTCCAGCAGTCCCATGTGCACGTCCATGACTTGCAGAGCTTTGGCCTTGACAAC	51614	endoplasmic reticulum-Golgi intermediate compartment protein 3 isoform b	5.43605	3.47339
ASHGA5P049509	0.0260185	0.0735935	3.89296	up	protein_coding	NM_001042697	CCDS42266.1	ZSWIM7	RefSeq	2008	chr17	-	15879874	15903006	AGCATAAAAGGTACAGATTGAGCATCATTCTTTCAAAATAGAATCCTGTCAAGAAATGCA	125150	zinc finger SWIM domain-containing protein 7	6.22127	4.2604
ASHGA5P016412	0.0195454	0.061853	3.88067	up	protein_coding	NM_003333	CCDS12382.1	UBA52	RefSeq	2801	chr19	+	18682613	18688270	GGCCGAGCTGACGCAAACATGCAGATCTTTGTGAAGACCCTCACTGGCAAAACCATCACC	7311	ubiquitin-60S ribosomal protein L40 precursor	8.57478	6.61848
ASHGA5P009035	0.0280146	0.0765721	3.87542	up	protein_coding	NM_183420	CCDS5952.1	FBXO25	RefSeq	2502	chr8	+	356807	419875	TGCATTTCTGTCGGCACTGCAGCATTCTCTTTTGGAAGGACTCAGGACACCCCTGCACGG	26260	F-box only protein 25 isoform 2	9.1821	7.22775
ASHGA5P003435	0.03263	0.0833924	3.87454	up	protein_coding	NM_003366	CCDS10601.1	UQCRC2	RefSeq	1674	chr16	+	21964608	21994668	TTCCAACACAGATGTCCAAGCTGCCAAGAACAAGCTGAAAGCTGGATACCTAATGTCAGT	7385	"cytochrome b-c1 complex subunit 2, mitochondrial precursor"	6.81571	4.86168
ASHGA5P004514	0.0214966	0.0657417	3.87383	up	protein_coding	NM_201412	CCDS32348.1	LUC7L	RefSeq	1452	chr16	-	238973	279449	ACCGAAGTGCGAAATACAAGTTCTCCAGAGAGCGGGCATCCAGAGAGGAGTCCTGGGAGA	55692	putative RNA-binding protein Luc7-like 1 isoform b	6.57432	4.62056
ASHGA5P033108	0.0433038	0.0974094	3.86939	up	protein_coding	NM_005801	CCDS11403.1	EIF1	RefSeq	1326	chr17	+	39845126	39847898	TTTCCACCGAGGAAAAGGAATCGTATCGTATGTCCGCTATCCAGAACCTCCACTCTTTCG	10209	eukaryotic translation initiation factor 1	9.62475	7.67264
ASHGA5P009097	0.0359629	0.0876704	3.86271	up	protein_coding	NM_145897	CCDS8854.1	PFDN5	RefSeq	608	chr12	+	53689234	53693234	GAGCTGAATCTGCCGCAGCTAGAAATGCTCAAGAACCAGCTGGACCAGATGTATGTCCCT	5204	prefoldin subunit 5 isoform gamma	6.21088	4.26127
ASHGA5P005126	0.0193157	0.0614328	3.85758	up	protein_coding	NM_005809	CCDS12281.1	PRDX2	RefSeq	1039	chr19	-	12907633	12912694	CATGGGGAAGTTTGTCCCGCTGGCTGGAAGCCTGGCAGTGACACGATTAAGCCCAACGTG	7001	peroxiredoxin-2 isoform a	5.71634	3.76864
ASHGA5P010883	0.0383553	0.0907862	3.85743	up	protein_coding	NM_012394	CCDS1217.1	PFDN2	RefSeq	668	chr1	-	161070345	161087866	AATGAGCACAGCCTAGTGATCGATACACTGAAGGAGGTAGATGAAACTCGTAAGTGCTAC	5202	prefoldin subunit 2	5.85919	3.91155
ASHGA5P005504	0.0069392	0.0328617	3.85614	up	protein_coding	NM_001161012	CCDS55148.1	ARMC10	RefSeq	2369	chr7	+	102715327	102740210	TTTGTCTGAAAATCCAGCCATGACAGAAGGACTTCTCCGTGCCCAAGTGGATTCATCATT	83787	armadillo repeat-containing protein 10 isoform d	5.92938	3.98222
ASHGA5P052275	0.0125743	0.0475658	3.85282	up	protein_coding	NM_001015892	CCDS4002.1	TAF9	RefSeq	1482	chr5	-	68660569	68665840	AGTCTCCAGCTGTAAAAGCTTCAATTCCTGCAACCTCAGCAGTTCAGAATGTTCTGATTA	6880	adenylate kinase isoenzyme 6 isoform a	7.42156	5.47564
ASHGA5P002343	0.0381989	0.0906507	3.8419	up	protein_coding	NM_018064	CCDS5013.1	AKIRIN2	RefSeq	1948	chr6	-	88384577	88411985	ATATGGAGAACAGCCTGCTAGCTATGTTTCATGAATCACGTATCCTGCATTTGTGGGCTG	55122	akirin-2	6.04407	4.10225
ASHGA5P005490	0.0125582	0.0475658	3.83984	up	protein_coding	NM_004853	CCDS32565.1	STX8	RefSeq	988	chr17	-	9153787	9479275	ATCTAATCAGGTCCAGCCTGATGAGTGAAGAGGCTAAGCGAGGAGCACCCAACCCTTGGC	9482	syntaxin-8	6.81018	4.86913
ASHGA5P007142	0.0353785	0.0868541	3.83677	up	protein_coding	NM_006384	CCDS10360.1	CIB1	RefSeq	995	chr15	-	90773476	90777279	TTATGCCTTCCGCATCTTTGACTTTGATGATGACGGAACCTTGAACAGAGAAGACCTGAG	10519	calcium and integrin-binding protein 1	5.46784	3.52795
ASHGA5P003842	0.0265675	0.0742709	3.83401	up	protein_coding	NM_139273	CCDS41602.1	CARS	RefSeq	2558	chr11	-	3022151	3078681	GACAAATACTCCAAGTTTGATGAAAATGTAAGCATGGTCTGCCCACACATGACATGGAGG	833	"cysteine--tRNA ligase, cytoplasmic isoform a"	5.98155	4.0427
ASHGA5P006468	2.18985e-06	0.000284555	3.83054	up	protein_coding	NM_145731	CCDS13990.1	SYNGR1	RefSeq	1341	chr22	+	39745953	39774394	ATCTTCACCTGGAGCCTGACCGCAGCCCTGGCCGTGCGGAGATTCAAGGACCTAAGCTTC	9145	synaptogyrin-1 isoform 1b	6.19423	4.25668
ASHGA5P039201	0.00990368	0.04082	3.8287	up	protein_coding	NM_002808	CCDS3258.1	PSMD2	RefSeq	2990	chr3	+	184017021	184026840	TTTGTTATCCTTCGGAAGAACCCCAATTATGATCTCTAAGTGACCACCAGGGGCTCTGAA	5708	26S proteasome non-ATPase regulatory subunit 2	9.03449	7.09763
ASHGA5P007453	0.000896855	0.0103118	3.82688	up	protein_coding	NM_004182	CCDS14285.1	UXT	RefSeq	619	chrX	-	47511190	47518579	TCCTACCAACCGTTCTTATTGCTGGCGGCCTGAGGAGCCCATCATGGCGACGCCCCCTAA	8409	protein UXT isoform 2	4.8977	2.96154
ASHGA5P017048	0.0211289	0.0650861	3.82253	up	protein_coding	NM_001100595	CCDS45748.1	SKA2	RefSeq	2988	chr17	-	57187307	57232800	AGCAAGTGAGCTGTCACCACTGACTAAAGAAGAGAAAACTGCGGCAGAGCAATTCAAATT	348235	spindle and kinetochore-associated protein 2 isoform 2	6.37294	4.43841
ASHGA5P008716	0.00985548	0.0406963	3.81325	up	protein_coding	NM_201434	CCDS11419.1	RAB5C	RefSeq	1819	chr17	-	40276993	40307062	AACGAAATCTTCATGGCAATAGCTAAGAAGCTTCCCAAGAACGAGCCCCAGAATGCAACT	5878	ras-related protein Rab-5C isoform a	5.46411	3.53309
ASHGA5P010107	0.0312333	0.0811253	3.80715	up	protein_coding	NM_001128913	CCDS44902.1	PCBP2	RefSeq	3094	chr12	+	53845885	53874946	ATGGCAACACCGGATTCAGTGGCATTGAATCCAGCTCTCCAGAGGTGAAAGGCTATTGGG	5094	poly(rC)-binding protein 2 isoform f	6.0847	4.15599
ASHGA5P044425	0.00331609	0.0217661	3.80069	up	protein_coding	NM_033512	CCDS34927.1	TSPYL5	RefSeq	4478	chr8	-	98285713	98290176	CTGGTTGTTCTACTTGGTAATTTGACACCCTGTTAATAACGCAATTATTTCTGTGTTCTT	85453	testis-specific Y-encoded-like protein 5	6.72111	4.79484
ASHGA5P004782	0.0459236	0.100625	3.79984	up	protein_coding	NM_020690	CCDS4224.1	ANKHD1-EIF4EBP3	RefSeq	8349	chr5	+	139781398	139929163	AAAGTTATCCAAAATTCAACTGAATGCACTGATGCCCAGCAGGCCAGTCTGCTTCCTTCA	404734	ANKHD1-EIF4EBP3 protein	5.63984	3.7139
ASHGA5P054771	0.0257868	0.0731381	3.7935	up	protein_coding	NM_030771	CCDS31448.1	CCDC34	RefSeq	1488	chr11	-	27360060	27384795	ATCATCTCTGGTAATTCATAAAGCCAGGAGCAATCTTTGCCTTGGAACTCTGTGCAGAAT	91057	coiled-coil domain-containing protein 34 isoform 1	6.10231	4.17879
ASHGA5P008514	0.000212907	0.00450912	3.78604	up	protein_coding	NM_001037175	CCDS31034.1	SUSD4	RefSeq	1114	chr1	-	223408251	223537544	TTGCTCTGGAAGGAGGAAGACCTGAACATCTTTTCCCTGTCCTTTATTTCCCACACATCA	55061	sushi domain-containing protein 4 isoform b precursor	5.49109	3.5704
ASHGA5P046209	0.0404672	0.0935693	3.77591	up	protein_coding	ENST00000545075	CCDS55427.1	MTRNR2L10	GENCODE	1121	chrX	-	55207823	55208944	TGATGCTATCTCAATCTAACAAATCATCACATACCCTACCCAAGAACAGGGTTTGTTAAG	100463488	MT-RNR2-like 10 [Source:HGNC Symbol;Acc:37167]	6.55066	4.63384
ASHGA5P009874	0.00457094	0.0264039	3.77535	up	protein_coding	NM_152524	CCDS42796.1	SGOL2	RefSeq	4542	chr2	+	201390864	201448818	GAACCCAAAAATCAGGAATAGGTGATAGACCATTACAGGACTTGTCAAATACCAGTTTTG	151246	shugoshin-like 2 isoform 1	4.77549	2.85888
ASHGA5P029432	0.0238256	0.0701276	3.75169	up	protein_coding	NM_002934	CCDS9561.1	RNASE2	RefSeq	735	chr14	+	21423629	21424594	TGTGGTAACCCAAATATGACCTGTCCTAGTAACAAAACTCGCAAAAATTGTCACCACAGT	6036	non-secretory ribonuclease precursor	6.39507	4.48753
ASHGA5P001384	0.0253286	0.0724602	3.744	up	protein_coding	NM_014034	CCDS47469.1	ASF1A	RefSeq	2525	chr6	+	119215240	119230335	CTTTTCTAAGCTTCAAAGGAATATTTTGGCATCTAATCCCAGGGTCACAAGATTCCACAT	25842	histone chaperone ASF1A	6.29441	4.38983
ASHGA5P052590	1.67337e-05	0.00103313	3.73136	up	protein_coding	NM_003542	CCDS4583.1	HIST1H4C	RefSeq	390	chr6	+	26104175	26104565	CGGCGGCTGAATCTAAGAATACGCGGTCTCCTGAGAACTTCAAAAAACAAAAACAAAAAA	8364	histone H4	7.58584	5.68614
ASHGA5P055013	0.00290178	0.0201049	3.73005	up	protein_coding	NM_145309	CCDS8208.1	LRTOMT	RefSeq	2658	chr11	+	71791376	71807938	GAACATCAAGCCCAAGAAGGCCTGGACCAAGCAGAATACACTTTGAGGCTCCCACGACCC	220074	leucine-rich repeat-containing protein 51 isoform 1	5.32705	3.42786
ASHGA5P009898	0.0123369	0.0469539	3.72391	up	protein_coding	NM_004635	CCDS2832.1	MAPKAPK3	RefSeq	2553	chr3	+	50654561	50686728	AAAGACCACTGGGACGAAGTCAAGGAGGAGATGACCAGTGCCTTGGCCACTATGCGGGTA	7867	MAP kinase-activated protein kinase 3	7.08503	5.18821
ASHGA5P033063	0.0482657	0.103447	3.71106	up	protein_coding	NM_024835	CCDS11314.1	GGNBP2	RefSeq	2869	chr17	+	34900736	34946276	AATGTACCACAGTTTGCAGAACCTACAGAAACGTTGTTTGGTCCCGATTCCGGAAAAGGT	79893	gametogenetin-binding protein 2	6.65269	4.76086
ASHGA5P050203	0.0432598	0.0974094	3.70829	up	protein_coding	NM_001020	CCDS12535.1	RPS16	RefSeq	603	chr19	-	39923846	39926618	TTTCCGGTTGCGGCGCCGCGCGGTGAGGTTGTCTAGTCCACGCTCGGAGCCATGCCGTCC	6217	40S ribosomal protein S16	7.03437	5.14362
ASHGA5P050306	0.000228956	0.0047214	3.70543	up	protein_coding	NM_001105552	CCDS12854.1	ZNF83	RefSeq	2749	chr19	-	53115617	53141644	ATGTGGAAAGGTCTTCCATCATATTTCACACCTTGCACAACATCAGAGAATCCACACTGG	55769	zinc finger protein 83 isoform a	4.92741	3.03777
ASHGA5P008902	0.0494612	0.105015	3.70077	up	protein_coding	NM_007209	CCDS6858.1	RPL35	RefSeq	475	chr9	-	127620157	127624240	TGCAGCAATGGCCAAGATCAAGGCTCGAGATCTTCGCGGGAAGAAGAAGGAGGAGCTGCT	11224	60S ribosomal protein L35	7.952	6.06418
ASHGA5P043797	0.00220511	0.0171346	3.70014	up	protein_coding	NM_015379	CCDS5656.1	BRI3	RefSeq	809	chr7	+	97910978	97920839	GACCGTCACCCGCTATCCTGCCAACTCTATCGTGGTCGTAGGAGGCTGTCCTGTCTGCAG	25798	brain protein I3 isoform a	8.45893	6.57135
ASHGA5P000905	0.0315049	0.0816018	3.69691	up	protein_coding	NM_002305	CCDS13954.1	LGALS1	RefSeq	586	chr22	+	38071612	38075809	ACGCTAAGAGCTTCGTGCTGAACCTGGGCAAAGACAGCAACAACCTGTGCCTGCACTTCA	3956	galectin-1	7.19532	5.309
ASHGA5P004598	0.0259779	0.0735306	3.69086	up	protein_coding	NM_173647	CCDS2051.1	RNF149	RefSeq	2968	chr2	-	101892062	101925178	AAATACGGCATTGCTAGAAGCCGGCAGGAGTGACTCTCGGCATGGAGGACCCATCTCCTA	284996	E3 ubiquitin-protein ligase RNF149 precursor	6.36733	4.48338
ASHGA5P011113	0.0427005	0.0966643	3.69084	up	protein_coding	NM_001017986	CCDS30821.1	FCGR1B	RefSeq	1917	chr1	-	120926127	120935944	TACACTGTGAAAGGCCTCCAGTTACCAACTCCTGTCTGGTTTCATGTCCTTTTCTATCTG	2210	high affinity immunoglobulin gamma Fc receptor IB isoform 1 precursor	6.19114	4.30719
ASHGA5P005219	0.0101414	0.0413737	3.6889	up	protein_coding	NM_016463	CCDS43370.1	CXXC5	RefSeq	1447	chr5	+	139028300	139062680	TTCAGAAAATGTGAGGAACTCAAAAAGAAGCCTTCCGCTGCTCTGGAGAAGGTGATGCTT	51523	CXXC-type zinc finger protein 5	5.20017	3.31698
ASHGA5P052261	2.61976e-06	0.000329475	3.67988	up	protein_coding	NM_174889	CCDS3979.1	NDUFAF2	RefSeq	719	chr5	+	60240955	60448864	GGAGCATTACCCCTACTGCGGGTCCCGCTGCTGGCAGCGCTGGAAACTGGGTGGACGGCA	91942	"mimitin, mitochondrial"	4.5161	2.63644
ASHGA5P013824	0.0182693	0.0596313	3.67916	up	protein_coding	NM_001012633	CCDS32378.1	IL32	RefSeq	919	chr16	+	3115312	3119668	TTTGTGACAAGTCCTACGGAGCCCCACGGGGGGACAAGGAGGAGCTGACACCCCAGAAGT	9235	interleukin-32 isoform A	7.43206	5.55268
ASHGA5P051523	5.70426e-05	0.00208067	3.67824	up	protein_coding	NM_198722	CCDS33759.1	AMIGO3	RefSeq	3008	chr3	-	49754266	49757238	GGACCTCGCTGCTCCAGAGTTTAATAAAGGTAGCACATGCTTATTGCTAGAGCCTTTGCA	386724	amphoterin-induced protein 3 precursor	7.24336	5.36434
ASHGA5P014187	3.422e-08	1.743e-05	3.67616	up	protein_coding	NM_030937	CCDS30557.1	CCNL2	RefSeq	3136	chr1	-	1321090	1334718	AGACCTCATGGAATTACATGAACGACAGCCTTCGCACCGACGTCTTCGTGCGGTTCCAGC	81669	cyclin-L2 isoform A	4.67103	2.79283
ASHGA5P022320	0.0381749	0.0906507	3.6736	up	protein_coding	NM_006432	CCDS32121.1	NPC2	RefSeq	921	chr14	-	74946642	74960084	TCTTCTGCTGGGAAATCCCAGTACAGATCGTTTCTCATCTCTAAGTGCCTCATTGAGTTC	10577	epididymal secretory protein E1 precursor	6.90534	5.02814
ASHGA5P001841	0.0356677	0.0872605	3.67121	up	protein_coding	ENST00000246554	CCDS12469.1	COX6B1	GENCODE	590	chr19	+	36139124	36149686	GTGCCTTTAGGATTCAGCACCATGGCGGAAGACATGGAGACCAAAATCAAGAACTACAAG	1340	cytochrome c oxidase subunit VIb polypeptide 1 (ubiquitous) [Source:HGNC Symbol;Acc:2280]	5.89876	4.0225
ASHGA5P029071	0.0384106	0.0907862	3.67071	up	protein_coding	NM_178230	CCDS30835.1	PPIAL4A	RefSeq	660	chr1	-	147954759	147955419	GCCATAATGGCACTGGTGACAAGTCCATCTATGGGGAGAAATTTGATGATGAGAACCTCA	164022	peptidylprolyl cis-trans isomerase A-like 4B	7.69018	5.81412
ASHGA5P012813	0.0122616	0.0467823	3.668	up	protein_coding	NM_203433	CCDS13661.1	PSMG1	RefSeq	1077	chr21	-	40547371	40555440	CAATCCCTCGGTTTTTGGCTCTTGTCCAAGGAAGAACATGCAGATAACTATTCTCACATG	8624	proteasome assembly chaperone 1 isoform b	5.49687	3.62188
ASHGA5P006119	0.00778277	0.0351588	3.65505	up	protein_coding	ENST00000314133	CCDS8054.1	COX8A	GENCODE	507	chr11	+	63742078	63744015	AAGCTTGGGATCATGGAATTGGCCGTTGGGCTTACCTCCTGCTTCGTGACCTTCCTCCTG	1351	cytochrome c oxidase subunit VIIIA (ubiquitous) [Source:HGNC Symbol;Acc:2294]	8.06556	6.19567
ASHGA5P034403	0.0179565	0.0589693	3.65322	up	protein_coding	NM_172251	CCDS12111.1	MRPL54	RefSeq	628	chr19	+	3762664	3767563	AACAGAACATCTGGCGCCACAACCGGCTGAGCAAGAACAAGAGGTTGTAGCATGGAGGGC	116541	"39S ribosomal protein L54, mitochondrial"	6.10616	4.23698
ASHGA5P007904	0.0157992	0.0544505	3.65165	up	protein_coding	NM_000904	CCDS4481.1	NQO2	RefSeq	1139	chr6	+	3000066	3019994	TCTACGATTCCGGTTTGCTCCAGGGTAAACTAGCGCTCCTTTCCGTAACCACGGGAGGCA	4835	ribosyldihydronicotinamide dehydrogenase [quinone]	5.51134	3.64279
ASHGA5P045676	0.00696814	0.0329045	3.65074	up	protein_coding	NM_016410	CCDS6537.1	CHMP5	RefSeq	2070	chr9	+	33264876	33282067	TTTGGATGAGGCAGCATCTGCACCTGCAATTCCAGAAGGTGTTCCCACTGATACAAAAAA	51510	charged multivesicular body protein 5 isoform 1	6.14709	4.2789
ASHGA5P002399	0.0456971	0.100392	3.64609	up	protein_coding	NM_001037872	CCDS42722.1	REV1	RefSeq	4748	chr2	-	100016937	100106480	ACATGAAAAGGCTGATGCAGCAATCGGTGGAATCGGTTTGGAATATGGCATTTGACTTTA	51455	DNA repair protein REV1 isoform 2	6.15077	4.28442
ASHGA5P049484	0.00785457	0.0353884	3.64314	up	protein_coding	NM_025099	CCDS42259.1	CTC1	RefSeq	7089	chr17	-	8128138	8151413	AAGTAAACAGAAAGCTTACTTCATCCTGTCTCTTGGTAGATCACACCCAGCTGTCACCCA	80169	CST complex subunit CTC1	4.91349	3.04831
ASHGA5P055760	0.0282565	0.0769218	3.6415	up	protein_coding	NM_001009814	CCDS31963.1	VWA8	RefSeq	3453	chr13	-	42293472	42535221	TGGCAAAGGAGTAAGGCAAATTCAGTACTCTTCTGATTCTTAAATGCTGATAGTTCTTGA	23078	uncharacterized protein KIAA0564 isoform b precursor	5.82847	3.96394
ASHGA5P000771	0.00174569	0.0150324	3.64066	up	protein_coding	NM_003718	CCDS5461.1	CDK13	RefSeq	6985	chr7	+	39989958	40136733	AATGTGGCACCTGTAAAAACAGGCCCTGGACAGCACTTAAACCACAGTGAATTGGCAATT	8621	cyclin-dependent kinase 13 isoform 1	5.3171	3.4529
ASHGA5P052990	0.0114711	0.0448928	3.63849	up	protein_coding	NM_001002926	CCDS34606.1	TWISTNB	RefSeq	3892	chr7	-	19735084	19748660	AGATGACACTCCAATGGAAGAGTCAGCCCTGCAGAATACTAATAATGCGAATGGCATCTG	221830	DNA-directed RNA polymerase I subunit RPA43	6.25092	4.38758
ASHGA5P021959	4.1925e-06	0.000449568	3.63641	up	protein_coding	NM_001184976	CCDS53799.1	NCKAP1L	RefSeq	3780	chr12	+	54892567	54936899	AAATGCCTAGACTTGTTCAGACCCCAAATCTAAGCCACCTTTCTTACTGGAAAAGTCCAT	3071	nck-associated protein 1-like isoform 2	5.02244	3.15992
ASHGA5P050724	5.001e-08	2.0378e-05	3.63275	up	protein_coding	NM_019091	CCDS33336.1	PLEKHA3	RefSeq	2516	chr2	+	179345198	179369782	TTAAACCTGAGATGTTTCAACTGCACCATCCGGATCCCTTAGTTTCTCCTGTGTCACCTT	65977	pleckstrin homology domain-containing family A member 3	4.52538	2.66432
ASHGA5P000881	0.01158	0.0451517	3.63253	up	protein_coding	NM_002812	CCDS12515.2	PSMD8	RefSeq	1556	chr19	+	38865189	38874464	TGACAGACTACGCCAAGAAGCGAGGGTGGGTCCTGGGCCCCAACAACTACTACAGTTTTG	5714	26S proteasome non-ATPase regulatory subunit 8	7.15051	5.28953
ASHGA5P049472	6.93546e-05	0.00233708	3.62762	up	protein_coding	NM_201542	CCDS487.2	MED8	RefSeq	1193	chr1	-	43850396	43855483	AAACCAACATCAAGTCGGCTTCCATGCATCCCTACCAGCGGTGAGTGTGGCTGGCAACCT	112950	mediator of RNA polymerase II transcription subunit 8 isoform 1	6.96084	5.10182
ASHGA5P001184	0.00155124	0.0141346	3.62302	up	protein_coding	NM_005692	CCDS5922.1	ABCF2	RefSeq	2262	chr7	-	150904922	150924317	CCCACAACGTGTGCACCCTGACATTGGCATCTCTGCCAAGGCCATGAGCATCATGAACTC	10061	ATP-binding cassette sub-family F member 2 isoform b	5.24781	3.39061
ASHGA5P002619	0.00805637	0.0358698	3.62053	up	protein_coding	NM_005669	CCDS4109.2	REEP5	RefSeq	3116	chr5	-	112212080	112258031	TACTACATGCTGAAGTGTGGCTTCCTGTTGTGGTGCATGGCCCCGAGCCCTTCTAATGGG	7905	receptor expression-enhancing protein 5	8.58665	6.73044
ASHGA5P005169	1.77312e-05	0.0010688	3.61912	up	protein_coding	NM_006354	CCDS2583.1	TADA3	RefSeq	2245	chr3	-	9821653	9834420	TAGTGCCCACAACCGCACCAAGAAGCACGACCTGCTGAGGCTGGCAAAGGAGGAGGTGAG	10474	transcriptional adapter 3 isoform a	5.45715	3.60151
ASHGA5P013377	0.000489138	0.00752696	3.61836	up	protein_coding	NM_002512	CCDS11580.1	NME2	RefSeq	846	chr17	+	49243632	49249105	CAGCTTCCCGGACCATGGCCAACCTGGAGCGCACCTTCATCGCCATCAAGCCGGACGGCG	4831	nucleoside diphosphate kinase B isoform a	5.97679	4.12145
ASHGA5P043944	0.0379084	0.0903541	3.61425	up	protein_coding	NM_001061	CCDS5855.1	TBXAS1	RefSeq	2082	chr7	+	139528951	139720125	TAGGGCTGCTTGAGGTCAAGTTGACACTGCTCCACGTGCTGCACAAGTTCCGGTTCCAAG	6916	thromboxane-A synthase isoform 1	6.01096	4.15726
ASHGA5P005788	0.03947	0.0922839	3.61124	up	protein_coding	NM_023075	CCDS11853.1	MPPE1	RefSeq	2976	chr18	-	11883471	11908796	GGAACAGAAACAACCCCAGTTTCATCATGGGTAGCATCACGCCCACAGACTACACCCTCT	65258	metallophosphoesterase 1 isoform 1	6.70186	4.84937
ASHGA5P021909	0.0298021	0.0791021	3.59995	up	protein_coding	ENST00000544216	CCDS12435.1	LSM14A	GENCODE	3715	chr19	+	34663351	34720420	TGAATATAGGAAAGACAACAAAGTTGCTGCATAGTCTACAAACAAGTCTCTGAAAATAGG	26065	"LSM14A, SCD6 homolog A (S. cerevisiae) [Source:HGNC Symbol;Acc:24489]"	5.50562	3.65764
ASHGA5P010366	0.0224226	0.0675154	3.59477	up	protein_coding	NM_007315	CCDS2309.1	STAT1	RefSeq	4326	chr2	-	191833761	191878976	AAGACTGAGTTGATTTCTGTGTCTGAAGTTCACCCTTCTAGACTTCAGACCACAGACAAC	6772	signal transducer and activator of transcription 1-alpha/beta isoform alpha	5.3071	3.4612
ASHGA5P006875	0.00549579	0.0289434	3.59275	up	protein_coding	NM_001142402	CCDS47465.1	CD164	RefSeq	3071	chr6	-	109687716	109703762	AATTCTACAGGTACAACAAATAACACTGTGACTCCAACCTCACAACCTGTGCGAAAGTCT	8763	sialomucin core protein 24 isoform 3 precursor	7.12221	5.27712
ASHGA5P010151	0.0389687	0.091532	3.59246	up	protein_coding	ENST00000359678	CCDS2304.1	HIBCH	GENCODE	1939	chr2	-	191069359	191184771	TGGAGTATCGGCTAAGTCAAGCTTGTATGAGAGGTCATGACTTTCATGAAGGCGTTAGAG	26275	3-hydroxyisobutyryl-CoA hydrolase [Source:HGNC Symbol;Acc:4908]	5.38668	3.5417
ASHGA5P016058	0.0159823	0.0548859	3.58995	up	protein_coding	NM_001030018	CCDS45546.1	APRT	RefSeq	673	chr16	-	88875876	88878342	TGCTGGCCACTGGTGTATGAGTGACCACAGGGCCTCCCAGCCCAACATCTCCAGCTGGAT	353	adenine phosphoribosyltransferase isoform b	6.15444	4.31048
ASHGA5P012429	0.00489305	0.0272827	3.58757	up	protein_coding	NM_015864	CCDS47384.1	FAM65B	RefSeq	2452	chr6	-	24839594	24877583	TATTCTAAAAAAGTAGAGAAGATCCTCTAATGGATCCCAGTGTGCCCATCCCTCAACCTC	9750	protein FAM65B isoform 2	7.33242	5.48942
ASHGA5P003216	2.423e-08	1.3713e-05	3.57965	up	protein_coding	NM_031311	CCDS5419.1	CPVL	RefSeq	1691	chr7	-	29035246	29186153	ACTGCGCCGCACCCTGAGAGATGGTTGGTGCCATGTGGAAGGTGATTGTTTCGCTGGTCC	54504	probable serine carboxypeptidase CPVL precursor	4.92971	3.08989
ASHGA5P004888	0.0128764	0.0482492	3.57577	up	protein_coding	NM_019852	CCDS32044.1	METTL3	RefSeq	1975	chr14	-	21966281	21979457	GGGAAGGAACACTGCTTGGTTGGTGTCAAAGGAAATCCCCAAGGCTTCAACCAGGGTCTG	56339	N6-adenosine-methyltransferase 70 kDa subunit	6.28031	4.44206
ASHGA5P039448	0.00208624	0.0166658	3.57474	up	protein_coding	NM_002704	CCDS3563.1	PPBP	RefSeq	1307	chr4	-	74852155	74853907	AAACATCCAAAGTTTGGAAGTGATCGGGAAAGGAACCCATTGCAACCAAGTCGAAGTGAT	5473	platelet basic protein preproprotein	8.19811	6.36027
ASHGA5P050425	0.0132711	0.049207	3.57252	up	protein_coding	NM_003353	CCDS1747.1	UCN	RefSeq	615	chr2	-	27530264	27531130	TTCGACTCGGTGGGCAAGTGATGGCCCGGTTTGGGGCTGCGAAAACGTTGACCCCTTTCC	7349	urocortin preproprotein	5.8334	3.99645
ASHGA5P003573	0.0199869	0.0628223	3.57124	up	protein_coding	NM_014288	CCDS30736.1	ITGB3BP	RefSeq	1019	chr1	-	63906440	63988944	CCTCACAAAGCATCACGTCATCTTGACAGCTATGAATTCCTTAAAGCCATTTTAAACTGA	23421	centromere protein R isoform 2	7.64236	5.80593
ASHGA5P052610	0.0157316	0.054363	3.57118	up	protein_coding	ENST00000359303	CCDS4638.1	HIST1H3J	GENCODE	478	chr6	-	27858092	27858570	GTGAGATCCGCCGTTATCAGAAGTCGACTGAGCTGCTCATCCGCAAACTGCCATTTCAGC	8356	"histone cluster 1, H3j [Source:HGNC Symbol;Acc:4774]"	6.31433	4.47794
ASHGA5P012653	0.0321254	0.0824035	3.5671	up	protein_coding	NM_001172415	CCDS55301.1	BAG1	RefSeq	3885	chr9	-	33252469	33264759	TTGAAAAGGAAAGGCTTGGTAAAAAAGGTTCAGGCATTCCTAGCCGAGTGTGACACAGTG	573	BAG family molecular chaperone regulator 1 isoform BAG-1S	6.38556	4.55082
ASHGA5P052086	0.00184982	0.0156383	3.56209	up	protein_coding	ENST00000368768	CCDS1026.1	LCE1C	GENCODE	695	chr1	-	152777310	152779107	CTGCTGCTGAAGTGGACCCTGAGCCTAGAAGAGCAGAATCCAGGACCGCAAACTGCCAAG	353133	late cornified envelope 1C [Source:HGNC Symbol;Acc:29464]	7.03017	5.19745
ASHGA5P010818	0.0224278	0.0675154	3.55625	up	protein_coding	NM_021243	CCDS43509.1	ABRACL	RefSeq	941	chr6	+	139349818	139364439	GGTTCAAAAAATGCTGATGGAAAGTTAAGCGTGAAATTTGGGGTCCTCTTCCGTGATGAT	58527	costars family protein ABRACL	7.60919	5.77883
ASHGA5P014392	0.00544127	0.028846	3.5547	up	protein_coding	NM_001025071	CCDS4307.1	RPS14	RefSeq	793	chr5	-	149823791	149829319	TTGCTTTCAGGGAGGAGCTTGTGAAGTAAGGAAATGGCACCTCGAAAGGGGAAGGAAAAG	6208	40S ribosomal protein S14	5.8274	3.99767
ASHGA5P005767	0.0364671	0.0881725	3.55425	up	protein_coding	NM_024557	CCDS7788.1	RIC3	RefSeq	5827	chr11	-	8127596	8190590	ACACCTGAAGGAAAATTGGGCCGATTTCCACCTATGATGCATCATCACCAGGCACCCTCA	79608	protein RIC-3 isoform a precursor	6.54908	4.71954
ASHGA5P052008	0.00430736	0.0254863	3.55005	up	protein_coding	NM_021159	CCDS47106.1	RAP1GDS1	RefSeq	3767	chr4	+	99182526	99365012	TAAGGTCACTGTGCAGTATAACAGATCCCGCCAATGAGAAGCTCTTGACTGTCTTTTGTG	5910	rap1 GTPase-GDP dissociation stimulator 1 isoform 2	5.06585	3.23801
ASHGA5P047293	0.0261506	0.0737735	3.54858	up	protein_coding	NM_001145373	CCDS44366.1	OTUD1	RefSeq	3125	chr10	+	23728197	23731310	CAGCAATAGAGAGGTTTCCTAAATTATCACATGAAGAGGATAGGCTAATCATGAGTAATT	220213	OTU domain-containing protein 1	6.2605	4.43326
ASHGA5P017328	0.0130568	0.0487038	3.5485	up	protein_coding	NM_001098503	CCDS44596.1	PTPRJ	RefSeq	3193	chr11	+	48002109	48154266	AATAGAACTGGATGATTTGAACACCTGCCTGGAATTCCATCATCTGAAACAGAGTTGGCA	5795	receptor-type tyrosine-protein phosphatase eta isoform 2 precursor	8.68055	6.85334
ASHGA5P011980	0.00473015	0.0267345	3.54802	up	protein_coding	NM_001024629	CCDS31179.1	NRP1	RefSeq	2373	chr10	-	33486546	33623833	GAAGTGGAAGGTGGCACCACTGTGCTGGCCACAGAAAAGCCCACGGTCATAGACAGCACC	8829	neuropilin-1 isoform c precursor	5.00248	3.17546
ASHGA5P013600	3.72945e-05	0.00163758	3.54314	up	protein_coding	NM_001079692	CCDS41652.1	MS4A14	RefSeq	3302	chr11	+	60163486	60185228	AGCACTTATTGGTCAAGGTGTCACGGGCATGAATGTTATCAGCTCCTTGGTTGCGATAAC	84689	membrane-spanning 4-domains subfamily A member 14 isoform 2	4.51188	2.68685
ASHGA5P011682	0.0416493	0.095277	3.54265	up	protein_coding	NM_001184979	CCDS434.1	NDUFS5	RefSeq	580	chr1	+	39491966	39500308	CGAGCATCGGCCATGCCTTTCTTGGACATCCAGAAAAGGTTCGGCCTTAACATAGATCGA	4725	NADH dehydrogenase [ubiquinone] iron-sulfur protein 5	6.31365	4.48882
ASHGA5P003722	0.0242174	0.0708927	3.53883	up	protein_coding	ENST00000274680	CCDS4494.1	FARS2	GENCODE	1841	chr6	+	5261583	5771816	AAGGTTGATCTCATAGACAAGTTTGTACATCCAAAGACGCACAAGACCAGCCACTGCTAC	10667	"phenylalanyl-tRNA synthetase 2, mitochondrial [Source:HGNC Symbol;Acc:21062]"	5.67105	3.84778
ASHGA5P016646	0.00662665	0.0320844	3.5344	up	protein_coding	NM_014775	CCDS43005.1	SFI1	RefSeq	4298	chr22	+	31892124	32014537	CAGCCAGCTGCTGCTGCACAGGTTCTGGAACCTCTGGCGGTCTCAGATTGAGCAGAAAAA	9814	protein SFI1 homolog isoform b	6.40293	4.58146
ASHGA5P007257	0.00107539	0.0113519	3.532	up	protein_coding	NM_033661	CCDS13691.1	WDR4	RefSeq	1554	chr21	-	44263189	44299693	GATCGTGGCGGTCTGTTTCTGTCGACTGTGGACCACTTATGTGCGATCCGTGGACCACTT	10785	tRNA (guanine-N(7)-)-methyltransferase subunit WDR4 isoform 1	6.63101	4.81053
ASHGA5P017331	0.0170662	0.0571572	3.53079	up	protein_coding	NM_001131062	CCDS47321.1	SAP30L	RefSeq	6120	chr5	+	153825516	153840613	CGACAAGAGCGTTGATCTGTTCCAGCTGCAGGTGAACACCCTACGACGTTATAAACGACA	79685	histone deacetylase complex subunit SAP30L isoform 2	5.97651	4.15652
ASHGA5P012596	0.0463099	0.10127	3.53066	up	protein_coding	NM_014059	CCDS41880.1	RGCC	RefSeq	1126	chr13	+	42031541	42045013	ACTTTAGCAAGTATGTGAAACAAGAAGTTCTGGGTCCTTTCATCATAAGGGAGAAGCTTC	28984	regulator of cell cycle RGCC	6.73182	4.91188
ASHGA5P004609	0.000976578	0.01079	3.52689	up	protein_coding	NM_016067	CCDS3604.1	MRPS18C	RefSeq	1121	chr4	+	84377117	84382929	TGAGGACCTGCCCATTTCAATGGAAAATCCTTATAAAGAACCTCTTAAGAAATGTATCTT	51023	"28S ribosomal protein S18c, mitochondrial"	7.44797	5.62957
ASHGA5P053335	0.000247385	0.00499744	3.52433	up	protein_coding	NM_015689	CCDS43659.1	DENND2A	RefSeq	3485	chr7	-	140218219	140302342	CGCCTGGCAGCACACCTACATCCCGGTGCTGCCACCCGCCATGGTCGACATCGTGTGCTC	27147	DENN domain-containing protein 2A	5.18034	3.36299
ASHGA5P034132	0.0333541	0.0841451	3.52094	up	protein_coding	ENST00000359788	CCDS32981.1	ZNF675	GENCODE	2209	chr19	-	23835707	23870017	GGAGAGAAACTACAGAACTGGAATGTGTGATAATGATTTTGACAACACCTCAAATTTTTC	171392	zinc finger protein 675 [Source:HGNC Symbol;Acc:30768]	5.43703	3.62107
ASHGA5P009645	0.0377592	0.0901249	3.51353	up	protein_coding	NM_007047	CCDS4605.1	BTN3A2	RefSeq	3812	chr6	+	26365397	26378548	TCTTCGTCCGATACCAATAAGTCAGCCTGATGCTCTAATGGAAAAATGGCCCTCTTCAAG	11118	butyrophilin subfamily 3 member A2 isoform a precursor	6.06653	4.25361
ASHGA5P012844	0.0143567	0.0515359	3.51149	up	protein_coding	NM_201516	CCDS47581.1	H2AFV	RefSeq	1299	chr7	-	44873212	44887725	CACTGCAGAGGTGTGATCCCTCACATCCACAAATCTCTGATTGGAAAGAAGGGACAGCAG	94239	histone H2A.V isoform 4	6.73137	4.91928
ASHGA5P007322	0.0106467	0.0427506	3.50503	up	protein_coding	NM_001013258	CCDS34694.1	ZNF789	RefSeq	547	chr7	+	99070514	99079948	CAGGGGGAAGGAGCTGCTCTCGTTTGAGGATGTGGCGATGTACTTCACCAGAGAGGAGTG	285989	zinc finger protein 789 isoform 2	6.03074	4.22132
ASHGA5P032996	0.000261166	0.00511635	3.50408	up	protein_coding	NM_020791	CCDS32601.1	TAOK1	RefSeq	12096	chr17	+	27717942	27878921	TACCTAGAGCTGGAATGCCGTCGCTTCAAGAGAAGAATGTTACTTGGGCGTCATAACTTA	57551	serine/threonine-protein kinase TAO1 isoform 1	4.87051	3.06147
ASHGA5P028073	0.0164882	0.0560258	3.49681	up	protein_coding	NM_001035267	CCDS44919.1	RPL41	RefSeq	593	chr12	+	56510373	56511616	AATCCATAGACATCTGACCTCGGCACTTAGCATCATCACAGCAAACTAACTGTAGCCTTT	6171	60S ribosomal protein L41	7.42916	5.62312
ASHGA5P006040	1.48e-09	3.484e-06	3.49308	up	protein_coding	NM_012292	CCDS32863.1	HMHA1	RefSeq	4282	chr19	+	1067164	1086627	GCCCTCGGGGGAGCTGCCCAGGAAGGATGGGGCTGACGCGGTGTTCCCCGGACCAAGCCT	23526	minor histocompatibility protein HA-1 isoform 1	4.48722	2.68272
ASHGA5P034412	0.000276957	0.00523443	3.48554	up	protein_coding	NM_001163724		SMIM1	RefSeq	555	chr1	+	3689351	3692546	ATCATCTTCATCCTGGGCTACCTCACAGGCTACTATGTGCACAAGTGCAAATAAATGCTG	388588	uncharacterized protein LOC388588	5.64708	3.8457
ASHGA5P043746	0.00104297	0.0111754	3.48282	up	protein_coding	NM_003094	CCDS30979.1	SNRPE	RefSeq	1593	chr1	+	203830739	203840280	AAATTCCACCATGGCGTACCGTGGCCAGGGTCAGAAAGTGCAGAAGGTTATGGTGCAGCC	6635	small nuclear ribonucleoprotein E	6.92229	5.12204
ASHGA5P027101	0.0434635	0.0976754	3.47723	up	protein_coding	NM_024829	CCDS31751.1	PLBD1	RefSeq	1951	chr12	-	14656596	14720791	GGCGTGACCAAGGGAAAGTGACTGATACGGCATCCATGAAATATATCATGCGATACAACA	79887	phospholipase B-like 1 precursor	6.47593	4.67799
ASHGA5P038128	0.0136321	0.0499192	3.47572	up	protein_coding	NM_206831	CCDS2629.1	DPH3	RefSeq	4065	chr3	-	16298567	16306496	GGGGAAGACGTGGCAACGTGTCCTAGCTGCTCTCTCATTATAAAAGTGATTTATGACAAA	285381	DPH3 homolog isoform 1	5.88591	4.0886
ASHGA5P042125	0.0404791	0.0935693	3.4717	up	protein_coding	NM_007044	CCDS5217.1	KATNA1	RefSeq	2051	chr6	-	149916010	149969940	TGCAAGTATAGCAGAAAACATGGAAGGTTATTCAGGTGCGGACATTACCAACGTGTGCAG	11104	katanin p60 ATPase-containing subunit A1 isoform 1	5.5724	3.77676
ASHGA5P007605	0.0037991	0.0235267	3.46981	up	protein_coding	NM_002719	CCDS9964.1	PPP2R5C	RefSeq	4445	chr14	+	102276139	102394328	AATAGAAAATCTAGCCAAAGCCAATCCCCAGTACACAGTGTATAGTCAAGCCAGCACCAT	5527	serine/threonine-protein phosphatase 2A 56 kDa regulatory subunit gamma isoform isoform a	8.24099	6.44613
ASHGA5P045495	0.0148399	0.0525276	3.46958	up	protein_coding	NM_052844	CCDS6906.2	WDR34	RefSeq	1818	chr9	-	131395939	131419129	TGATCTCCAGAAAAGCTCCCAGAAACCCACAGTTTTGATCAAGCAAACCCAGGATGAAAG	89891	WD repeat-containing protein 34	5.7872	3.99244
ASHGA5P007104	0.00633567	0.0313628	3.46933	up	protein_coding	ENST00000328178	CCDS32977.1	ZNF85	GENCODE	2331	chr19	+	21106058	21133503	AAACCCACAGTTATGTGTTCTCATTTTGCCCAAGACCTTTGGCCGGAGCAGAATATAAAA	7639	zinc finger protein 85 [Source:HGNC Symbol;Acc:13160]	6.43835	4.64369
ASHGA5P002035	0.0222907	0.0672218	3.46819	up	protein_coding	NM_018466	CCDS14559.1	ALG13	RefSeq	2993	chrX	+	110924345	110933623	CAGTCTGCAAAAAATCGAGAGCCTTGGTTACAACCGACTTATCCTGCAAATTGGTAGAGG	79868	UDP-N-acetylglucosamine transferase subunit ALG13 homolog isoform 2	5.77946	3.98527
ASHGA5P055273	5.54502e-05	0.00206242	3.46794	up	protein_coding	NM_001127584	CCDS44815.1	ING4	RefSeq	1449	chr12	-	6759703	6772308	ACCTATTGCCTTTGTCACCAGGTCTCCTATGGAGAGATGATTGGCTGTGACAACCCTGAT	51147	inhibitor of growth protein 4 isoform 4	4.23405	2.43997
ASHGA5P052574	0.00908355	0.03878	3.46408	up	protein_coding	NM_032122	CCDS4534.1	DTNBP1	RefSeq	1429	chr6	-	15523031	15663289	TTCAGTCCGATGAGGAGGAAGTTCAGGTGGACACTGCCCTGGCCACATCACACACTGACA	84062	dysbindin isoform a	6.37929	4.58681
ASHGA5P004563	0.0280409	0.0766236	3.46376	up	protein_coding	NM_181455	CCDS1567.1	MRPL55	RefSeq	703	chr1	-	228294379	228297013	GGCAGCCTGCTTGGCCGGCTGAGGCAGAGCACCGTGAAGGCCACCGGACCTGCACTCCGC	128308	"39S ribosomal protein L55, mitochondrial isoform a"	5.92179	4.12945
ASHGA5P017599	0.00823601	0.0364308	3.46264	up	protein_coding	NM_001143681	CCDS47732.1	GSTK1	RefSeq	929	chr7	+	142960521	142966222	AAAGACAGTGGAAGTTTGTCTGCCATGCGTTTCCTCACCGCCGTGAACTTGGAGCATCCA	373156	glutathione S-transferase kappa 1 isoform d	5.66976	3.87789
ASHGA5P056006	0.00790788	0.0355036	3.45444	up	protein_coding	NM_054016	CCDS30630.1	SRSF10	RefSeq	3056	chr1	-	24295572	24306953	TCACGTTCTAGGTCTGCATCTCACACCAAAACTAGAGGCACCTCTAAAACAGATTCCAAA	10772	serine/arginine-rich splicing factor 10 isoform 2	6.52584	4.73739
ASHGA5P041653	0.0492268	0.104797	3.43811	up	protein_coding	ENST00000500576	CCDS54962.1	LYRM4	GENCODE	794	chr6	-	5186833	5261172	GTAGAAATTCAAACCCTAGTGAATAAAGCCAAGAGAGACCTTGGAGTAATTCGTCGACAG	57128	LYR motif containing 4 [Source:HGNC Symbol;Acc:21365]	6.52703	4.74541
ASHGA5P055897	0.0389617	0.091532	3.4357	up	protein_coding	NM_001077443	CCDS45079.1	HNRNPC	RefSeq	3187	chr14	-	21677295	21737638	ATGACTCTTAAGCACATAGTGGGGTTTAGAAATCTTATCCCATTATTTCTTTACCTAGGC	3183	heterogeneous nuclear ribonucleoproteins C1/C2 isoform b	7.50682	5.72621
ASHGA5P012419	0.00925488	0.0391689	3.43512	up	protein_coding	NM_022343	CCDS6598.1	GLIPR2	RefSeq	1900	chr9	+	36136741	36163903	TTCACCTCGGGGACTGGACACTTCACGGCCATGGTATGGAAGAACACCAAGAAGATGGGC	152007	Golgi-associated plant pathogenesis-related protein 1	5.80081	4.02045
ASHGA5P007188	0.0102085	0.0415145	3.42797	up	protein_coding	NM_003916	CCDS14173.1	AP1S2	RefSeq	2283	chrX	-	15843928	15873100	ACTGCAGGAGGAAGCTGAAACCCCACGTAGTGTTCTTGAAGAAATTGGACTGACATAACT	8905	AP-1 complex subunit sigma-2	6.45977	4.68241
ASHGA5P009615	0.0344313	0.0855645	3.42746	up	protein_coding	NM_017569	CCDS9362.1	FAM48A	RefSeq	2981	chr13	-	37583450	37633850	TTAACCTTACTGGAGTAGGAAGTTTTATGCAGTCACAGGCAGCTGCAGTTGCGATTCTTG	55578	protein FAM48A isoform b	6.19976	4.42262
ASHGA5P049329	1.347e-08	1.0555e-05	3.42681	up	protein_coding	NM_001077416	CCDS45531.1	TMEM231	RefSeq	2974	chr16	-	75572014	75590136	CGGAGCCACGGTGAGCCTGCCCCGGCCGCTGTGCCACGAGGCTCCCCGGGCGCGCTCGGC	79583	transmembrane protein 231 isoform 1	5.28947	3.5126
ASHGA5P012551	0.00178661	0.0153198	3.42654	up	protein_coding	NM_019593	CCDS13090.1	GPCPD1	RefSeq	5478	chr20	-	5525079	5591672	CAACCACGATCAATAACCCCTTTAGAAAGCGAAATTATTATTGACGATGGACAATTTGGA	56261	glycerophosphocholine phosphodiesterase GPCPD1	5.42389	3.64713
ASHGA5P043796	3.7198e-07	0.000102415	3.41378	up	protein_coding	ENST00000314018	CCDS5655.1	BHLHA15	GENCODE	706	chr7	+	97841565	97842271	AGACGCTCACGCTGGCCAAGAACTACATCAAATCGCTGACGGCCACCATCCTGACCATGT	168620	"basic helix-loop-helix family, member a15 [Source:HGNC Symbol;Acc:22265]"	4.69945	2.92808
ASHGA5P011138	0.0356987	0.087314	3.41375	up	protein_coding	NM_033020	CCDS873.1	TRIM33	RefSeq	8288	chr1	-	114935398	115053781	GTTTAATGAAGCTGATTCAGAAGTAGCTCAGGCAGGGAAAGCAGTTGCATTGTACTTTGA	51592	E3 ubiquitin-protein ligase TRIM33 isoform beta	7.05186	5.28051
ASHGA5P002069	0.0103055	0.0418087	3.41033	up	protein_coding	NM_015965	CCDS12404.2	NDUFA13	RefSeq	557	chr19	+	19627018	19639013	ATCATGAAGGACGTGCCCGACTGGAAGGTGGGGGAGTCTGTGTTCCACACAACCCGCTGG	51079	NADH dehydrogenase [ubiquinone] 1 alpha subcomplex subunit 13	7.59274	5.82283
ASHGA5P007799	0.0148767	0.052602	3.40756	up	protein_coding	ENST00000337018	CCDS12392.1	SUGP2	GENCODE	3657	chr19	-	19101696	19144380	CAACAAATAGTTCCAGGGTCACCCCCGAGAGGACAACAGGCATCTGGAAGTGCTCTCTCG	10147	SURP and G patch domain containing 2 [Source:HGNC Symbol;Acc:18641]	8.52741	6.75867
ASHGA5P007474	0.00240374	0.0179799	3.40734	up	protein_coding	NM_148896	CCDS11790.1	NPB	RefSeq	634	chr17	+	79860071	79860781	GCGGAGCCTCGCTGTGTGCGTCCAGGACGTCGCCCCAAACCTGCAGAGGTGCGAGCGGCT	256933	neuropeptide B preproprotein	5.5689	3.80026
ASHGA5P007249	0.0414463	0.0950075	3.40647	up	protein_coding	NM_001311	CCDS10004.1	CRIP1	RefSeq	480	chr14	+	105953256	105955124	TGCAACAAGGAGGTGTACTTCGCCGAGAGGGTGACCTCTCTGGGCAAGGACTGGCATCGG	1396	cysteine-rich protein 1	7.17904	5.41076
ASHGA5P001869	2.30152e-05	0.00122751	3.40504	up	protein_coding	NM_014172	CCDS7009.1	PHPT1	RefSeq	1218	chr9	+	139743255	139745490	CTATTCCATGGCCTATGGTCCTGCCCAGCACGCCATTTCAACTGAGAAAATCAAAGCCAA	29085	14 kDa phosphohistidine phosphatase isoform 3	8.37085	6.60318
ASHGA5P001039	0.0391131	0.0918076	3.40277	up	protein_coding	NM_003254	CCDS14281.1	TIMP1	RefSeq	931	chrX	+	47441689	47446190	TTTCTCATTGCTGGAAAACTGCAGGATGGACTCTTGCACATCACTACCTGCAGTTTTGTG	7076	metalloproteinase inhibitor 1 precursor	5.99803	4.23132
ASHGA5P045075	4.41738e-05	0.00182186	3.39348	up	protein_coding	ENST00000504548	CCDS6406.2	TIGD5	GENCODE	2412	chr8	+	144680073	144682485	GCCCCGGAGCCACAGCACAATCATCTCAGTGGCGAAGCACACCACTTGATTCTATTTTTT	84948	tigger transposable element derived 5 [Source:HGNC Symbol;Acc:18336]	7.17284	5.41008
ASHGA5P030100	0.00741945	0.0341382	3.38699	up	protein_coding	ENST00000204549	CCDS10201.1	PDCD7	GENCODE	2851	chr15	-	65409716	65426174	CATTAAAAAGCGCTCTGAACTGTATGAAGCTGAAGAGAGAGCCCTCAGAGTTATGCTAGA	10081	programmed cell death 7 [Source:HGNC Symbol;Acc:8767]	5.46267	3.70267
ASHGA5P014448	0.00218488	0.0170686	3.38573	up	protein_coding	NM_001142645	CCDS46476.1	TMEM194B	RefSeq	3637	chr2	-	191371618	191399468	CTCCTAGCAAATTTGCAGACTTTGTTCTTGGAGGAAGCCACTTGTCACCTGAAGAAATCA	100131211	transmembrane protein 194B precursor	5.62916	3.8697
ASHGA5P051398	0.000502055	0.00766782	3.38571	up	protein_coding	NM_033084	CCDS2595.1	FANCD2	RefSeq	5204	chr3	+	10068112	10141344	AGCCACTGAGGTATCTCTACAAAACCCACCAGAGTCTGGCACTGATGGTTGCATTTTGTT	2177	Fanconi anemia group D2 protein isoform a	5.01367	3.25421
ASHGA5P013803	2.39725e-05	0.0012588	3.37905	up	protein_coding	ENST00000396693	CCDS53987.1	SEPT12	GENCODE	1386	chr16	-	4827614	4838522	AACAATGACAACTGCCTGCGGCCCCTGGACATTGAGTTCCTGCAGCGGCTGTGCCGGACT	124404	septin 12 [Source:HGNC Symbol;Acc:26348]	7.41189	5.65528
ASHGA5P046956	0.000510116	0.00771876	3.37799	up	protein_coding	NM_004747	CCDS7353.2	DLG5	RefSeq	7493	chr10	-	79550548	79686348	GGAGAAGACGCAGCCTCACCTGCTGCCCATTCTCTACCTGAACGGCGTCGTCGGGCCGCC	9231	disks large homolog 5	6.19115	4.43499
ASHGA5P006112	0.00129976	0.0127447	3.37609	up	protein_coding	NM_001893	CCDS11805.1	CSNK1D	RefSeq	3714	chr17	-	80200536	80231594	ATACCTCTCGCATGTCCACCTCACAGATTCCTGGTCGGGTGGCTTCCAGTGGTCTTCAGT	1453	casein kinase I isoform delta isoform 1	6.03375	4.2784
ASHGA5P046634	0.0370092	0.0889601	3.37251	up	protein_coding	NM_181777	CCDS14582.1	UBE2A	RefSeq	2678	chrX	+	118714297	118718379	CTGAAGAATATCCAAATAAACCACCTACAGTTAGATTTGTCTCTAAGATGTTCCATCCAA	7319	ubiquitin-conjugating enzyme E2 A isoform 3	5.57546	3.82164
ASHGA5P009596	0.0251703	0.0722938	3.37093	up	protein_coding	NM_001002032	CCDS32729.1	HN1	RefSeq	1582	chr17	-	73131343	73150774	ACTCCTCTGAAGCAAGCTCCGGAGACTTCTTAGATCTGAAGAAAATGTGGACACAGACTT	51155	hematological and neurological expressed 1 protein isoform 2	5.93282	4.17968
ASHGA5P001463	0.029206	0.0782537	3.36903	up	protein_coding	NM_020685	CCDS2896.1	C3orf14	RefSeq	832	chr3	+	62305395	62319320	TTCTCTTGAGACTCGTTACTGGGCATCAGTAGAAGAATATATTCCCAAATGGGAACAGTT	57415	uncharacterized protein C3orf14	5.52512	3.77278
ASHGA5P051929	0.012135	0.0465257	3.36695	up	protein_coding	ENST00000381799	CCDS3458.1	RHOH	GENCODE	1999	chr4	+	40198526	40246281	TAAACCCCAAGAGACTTCACACAACACTTATGTATGCACCCCAAAGACTAATGGGGAGAG	399	ras homolog family member H [Source:HGNC Symbol;Acc:686]	8.16453	6.41308
ASHGA5P005669	0.0126361	0.0476756	3.36409	up	protein_coding	NM_014547	CCDS10145.1	TMOD3	RefSeq	4682	chr15	+	52121824	52204331	ACAGAACTGAAACAACTGGAAACTGTTTTGGATGATCTTGACCCCGAGAATGCCCTTCTG	29766	tropomodulin-3	8.6452	6.89498
ASHGA5P005981	0.00162538	0.0144989	3.36321	up	protein_coding	NM_001012762	CCDS32506.1	CTU2	RefSeq	1681	chr16	+	88772890	88781786	GAAGGACTTGGGCCTGGGGCTTGCAGGAGATCCGGGACTGTCTGATTGAGGACAGTGACG	348180	cytoplasmic tRNA 2-thiolation protein 2 isoform 2	5.11302	3.36318
ASHGA5P001228	0.0234304	0.0693852	3.36315	up	protein_coding	NM_006555	CCDS5482.1	YKT6	RefSeq	2783	chr7	+	44240577	44253893	AAAGCCTTCTATAAAACTGCCCGGAAACAAAACTCATGCTGTGCCATCATGTGATGCAGC	10652	synaptobrevin homolog YKT6	4.91478	3.16497
ASHGA5P007520	0.00112233	0.0117282	3.36244	up	protein_coding	NM_178569	CCDS34131.1	C5orf38	RefSeq	900	chr5	+	2752261	2755511	CAGGCTCCCGCCAAAGAATTTAGAACGAGTCTACGTGGACACGCAAGTTTCAGCGAGCGG	153571	protein CEI precursor	4.70514	2.95564
ASHGA5P042491	0.0014714	0.0136341	3.35737	up	protein_coding	NM_145267	CCDS4972.1	C6orf57	RefSeq	526	chr6	+	71276624	71298606	TACCAGAAGGTCGTTTTGATGCACCAGAGGATTCCCATTTAGAGAAAGAACCACTGGAAA	135154	UPF0369 protein C6orf57 precursor	8.07409	6.32676
ASHGA5P015226	0.0439279	0.0981626	3.35707	up	protein_coding	NM_015184	CCDS33713.1	PLCL2	RefSeq	3964	chr3	+	16974581	17132098	CATCTTAAAGGGACAAGCAGATCTTTTGAAATATGCTAAGAATGAGACATTGGAGAACCT	23228	inactive phospholipase C-like protein 2 isoform 2	5.37919	3.63199
ASHGA5P027604	1.71e-09	3.484e-06	3.35564	up	protein_coding	NM_181486	CCDS9173.1	TBX5	RefSeq	3828	chr12	-	114791734	114843968	TTTGGCCTGGCGCACACGCCTCTGGAGCCTGACGCAAAAGACCTGCCCTGCGATTCGAAA	6910	T-box transcription factor TBX5 isoform 1	4.94471	3.19812
ASHGA5P007147	0.033099	0.0838965	3.35295	up	protein_coding	NM_001008215	CCDS33257.1	COA5	RefSeq	1767	chr2	-	99215785	99224981	TGTGGTCCAGGAAGGAAAATCACCTCGGCAGTGTTTGAAGGAAGGATACTGCAACTCTTT	493753	cytochrome c oxidase assembly factor 5	6.05246	4.30703
ASHGA5P056175	0.000724647	0.00925061	3.35216	up	protein_coding	NM_152326	CCDS9973.1	ANKRD9	RefSeq	1626	chr14	-	102973197	102976128	CAAAGGCTAGGCCCGGAGCACCCTAGGCGCTGGATTTTGGGACAAAACTATTTTTCAGAG	122416	ankyrin repeat domain-containing protein 9	8.11567	6.37058
ASHGA5P055830	0.0145468	0.051814	3.35146	up	protein_coding	NM_006260	CCDS9479.1	DNAJC3	RefSeq	5598	chr13	+	96329392	96447243	ATTTAGATTTAAATTCCACTTCAATTAAACCAACTGTTTTTCTGCTCTTCTTAATTTTTT	5611	dnaJ homolog subfamily C member 3 precursor	5.71231	3.96752
ASHGA5P014096	0.00609948	0.0305271	3.35085	up	protein_coding	ENST00000399598	CCDS43741.1	UBXN2B	GENCODE	5068	chr8	+	59323822	59364060	GGATTTGCAGTTGGCCTTGGCAGAATTGTATGAAGATGAAGTGAAGTGCAAATCTTCCAA	137886	UBX domain protein 2B [Source:HGNC Symbol;Acc:27035]	6.44613	4.7016
ASHGA5P045202	0.0146856	0.0521597	3.34841	up	protein_coding	ENST00000259633	CCDS6581.1	CD72	GENCODE	1548	chr9	-	35609975	35618424	ATTGGACTGGCCTCAGCTCTAACAAGGATTGGAAGTTGACTGATGATACACAACGCACTA	971	CD72 molecule [Source:HGNC Symbol;Acc:1696]	4.91651	3.17304
ASHGA5P000827	4.45109e-06	0.000462686	3.34712	up	protein_coding	NM_005954	CCDS10762.1	MT3	RefSeq	599	chr16	+	56623266	56625000	TGCCCTTCTGGTGGCTCCTGCACCTGCGCGGACTCCTGCAAGTGCGAGGGATGCAAATGC	4504	metallothionein-3	7.46159	5.71867
ASHGA5P002580	0.00997362	0.0409392	3.34697	up	protein_coding	NM_002431	CCDS9750.1	MNAT1	RefSeq	1397	chr14	+	61201458	61435398	TAGATGAGCTGGAGAGTTCTGATCTCCCTGTTGCTCTGCTTTTGGCTCAGCATAAAGATA	4331	CDK-activating kinase assembly factor MAT1 isoform 1	6.52271	4.77985
ASHGA5P002444	0.000578503	0.00834732	3.34476	up	protein_coding	NM_173841	CCDS2114.1	IL1RN	RefSeq	1865	chr2	+	113875469	113891593	GACTCAAAGGAGACGATCTGCCGACCCTCTGGGAGAAAATCCAGCAAGATGCAAGCCTTC	3557	interleukin-1 receptor antagonist protein isoform 2	4.89051	3.14861
ASHGA5P012395	0.00817841	0.0362705	3.33285	up	protein_coding	NM_001025158	CCDS34276.1	CD74	RefSeq	1322	chr5	-	149781199	149792499	ATGACAGAGGACCATGTGATGCACCTGCTCCAGAGTCACTGGAACTGGAGGACCCGTCTT	972	HLA class II histocompatibility antigen gamma chain isoform c	5.48677	3.75002
ASHGA5P001836	0.0448672	0.0993397	3.33158	up	protein_coding	NM_001003962	CCDS12489.1	CAPNS1	RefSeq	1489	chr19	+	36630917	36641255	AGGTGAACATCCAGGAGTGGCTGCAGCTGACTATGTATTCCTGAACTGGAGCCCCAGACC	826	calpain small subunit 1	7.31593	5.57973
ASHGA5P052556	0.0272348	0.0754872	3.32993	up	protein_coding	NM_032292	CCDS1121.1	GON4L	RefSeq	4738	chr1	-	155734575	155826972	AGAACTCCAGGTGAGAGCTGGAGAATATTCTCAAGTATTTCGTGGACTCAGTAATATGTA	54856	GON-4-like protein isoform b	6.15208	4.41659
ASHGA5P045684	8.01316e-06	0.000645295	3.32648	up	protein_coding	NM_017811	CCDS6546.1	UBE2R2	RefSeq	4457	chr9	+	33817181	33920401	AATGGAGATGTATGCATTTCGATTCTTCATCCGCCTGTAGATGACCCACAGAGTGGAGAA	54926	ubiquitin-conjugating enzyme E2 R2	4.94527	3.21127
ASHGA5P006649	0.0387305	0.0912482	3.32296	up	protein_coding	NM_005528	CCDS41666.1	DNAJC4	RefSeq	1300	chr11	+	63997752	64001753	ATCATCACAGCCTTCTACAACGAAGCCCGGGCACGGGCCAGGGCCAACAGAGGCATCCTT	3338	dnaJ homolog subfamily C member 4	5.67638	3.9439
ASHGA5P005957	0.000368623	0.00633082	3.32281	up	protein_coding	ENST00000311890	CCDS30611.1	HSPB7	GENCODE	2892	chr1	-	16340522	16345285	GCCTTCCCAGCCCGCCCCGGTGGGGCAGGCAACATCAAGACCCTAGGAGACGCCTATGAG	27129	"heat shock 27kDa protein family, member 7 (cardiovascular) [Source:HGNC Symbol;Acc:5249]"	6.35542	4.62302
ASHGA5P049634	0.0260581	0.0736554	3.31014	up	protein_coding	ENST00000417170	CCDS45656.1	TADA2A	GENCODE	1304	chr17	+	35767311	35825757	AGCCATGCATGTAGGTGGTTTTTGAGCCTTGAGCAGTATTTGTGTGTGTATATTTATATA	6871	transcriptional adaptor 2A [Source:HGNC Symbol;Acc:11531]	5.76858	4.04169
ASHGA5P013348	2.86999e-05	0.00137261	3.30099	up	protein_coding	NM_178826	CCDS31884.1	ANO4	RefSeq	4142	chr12	+	101188373	101522419	TTCCACCCAGTGGCCAAGGATGTCAATATTCTTTTTGATGAATTAGAAGCTGTCAGCAGT	121601	anoctamin-4	5.43191	3.70901
ASHGA5P000654	0.0185189	0.0599935	3.29969	up	protein_coding	NM_198175	CCDS11578.1	NME1	RefSeq	1031	chr17	+	49230919	49239450	ACAAGTTGGCAGGAACATTATACATGGCAGTGATTCTGTGGAGAGTGCAGAGAAGGAGAT	4830	nucleoside diphosphate kinase A isoform a	6.64854	4.92621
ASHGA5P009603	0.00117869	0.0120676	3.29566	up	protein_coding	NM_001032387	CCDS8901.2	SUOX	RefSeq	2329	chr12	+	56391042	56399309	ATTGCAGTGCTGAAGACACTGGACCCGGTCTGCTACAATGCTGCTGCTGCACAGAGCTGT	6821	"sulfite oxidase, mitochondrial"	7.64211	5.92154
ASHGA5P043695	0.000830116	0.00989052	3.29504	up	protein_coding	NM_001013746	CCDS5527.1	ZNF107	RefSeq	5239	chr7	+	64126510	64171401	CCAATGTTTGACAGCTACCCCAAGCAAAATATTCCAGTGTAATAAATATGTGAAAGTCTT	51427	zinc finger protein 107	6.50467	4.78438
ASHGA5P035643	0.000543208	0.00803144	3.27781	up	protein_coding	ENST00000408934	CCDS33417.1	PRR21	GENCODE	1170	chr2	-	240981229	240982399	AGGGCCACCTTCAACACCTGTCTTCTTGTTTCTAACATGTACTTTCTAATAATCTCTTAC	643905	proline rich 21 [Source:HGNC Symbol;Acc:33866]	5.61363	3.9009
ASHGA5P053468	0.0137105	0.0500785	3.27377	up	protein_coding	NM_014018	CCDS6226.1	MRPS28	RefSeq	724	chr8	-	80831094	80942506	TTTCGCGAGCGCGTTGGAGCGGCACTCGGAGCTTCTACAGAAGGTGGAGCCCCTACAGAA	28957	"28S ribosomal protein S28, mitochondrial"	5.44078	3.72982
ASHGA5P018356	0.00698182	0.0329277	3.2684	up	protein_coding	ENST00000543753	CCDS1754.1	KRTCAP3	GENCODE	956	chr2	+	27665232	27669348	TTTAGGACAGGTAGTAGCTGGGTGTGACGCAAGAGTGAAACAGAAAGCCTGGCAGCCACG	200634	keratinocyte associated protein 3 [Source:HGNC Symbol;Acc:28943]	5.15576	3.44717
ASHGA5P012626	0.0115816	0.0451517	3.26704	up	protein_coding	NM_030969	CCDS4515.1	TMEM14B	RefSeq	989	chr6	+	10747994	10757214	CCTTCGGCAGATGCAGGCCTGGGGTAGTCTCCTTTCTGGACTGAGAAGAGAAGAATGGAG	81853	transmembrane protein 14B isoform a	4.54554	2.83756
ASHGA5P000897	0.0347302	0.0859848	3.26609	up	protein_coding	NM_001084393	CCDS42988.1	DDTL	RefSeq	1641	chr22	+	24309025	24314748	TCTTTGAGTTTCTCACCAAGGAGCTAGCCCTGGGCCAGGACCGGTTCCCTACGGTCTTAT	100037417	D-dopachrome decarboxylase-like protein	6.49879	4.79123
ASHGA5P007219	0.0103353	0.0419132	3.26392	up	protein_coding	ENST00000396265	CCDS14046.1	TSPO	GENCODE	654	chr22	+	43547534	43559247	TCTTCTTTGGTGCCCGACAAATGGGCTGGGCCTTGGTGGATCTCCTGCTGGTCAGTGGGG	706	translocator protein (18kDa) [Source:HGNC Symbol;Acc:1158]	6.67892	4.97231
ASHGA5P010487	0.0304264	0.0796797	3.26356	up	protein_coding	NM_001010986	CCDS35410.1	ATP11C	RefSeq	6023	chrX	-	138808504	138914447	AAGTGCCAGGAATCCGAATCTTGAACTGCCTATGTTATTGTCCTACAAGCATACTGACAG	286410	probable phospholipid-transporting ATPase IG isoform b	6.15497	4.44853
ASHGA5P004946	0.0439518	0.0981664	3.26143	up	protein_coding	NM_148923	CCDS12004.1	CYB5A	RefSeq	850	chr18	-	71920526	71959251	CAGACCAAAGTTAAACAAGCCTCCGGAAACTCTTATCACTACTATTGATTCTAGTTCCAG	1528	cytochrome b5 isoform 1	5.26031	3.55481
ASHGA5P037076	0.00161535	0.0144568	3.25871	up	protein_coding	NM_033542	CCDS13351.1	SYS1	RefSeq	2802	chr20	+	43991739	43997862	TAGAATCAGGCCCTTTGGACATCCTGCTGACACTTGGGCCCCTTAACACCTTGGGCTGCT	90196	protein SYS1 homolog isoform a	7.33281	5.62851
ASHGA5P008039	0.00495326	0.0275168	3.25254	up	protein_coding	NM_022734	CCDS9562.1	METTL17	RefSeq	1729	chr14	+	21457964	21465194	GGCACGGCAGGGATTTGTATCGTTGTGCCCGTGTCAGCTCCTGGGGAGATCTTTTACCTG	64745	"methyltransferase-like protein 17, mitochondrial isoform 2 precursor"	7.10995	5.40838
ASHGA5P028246	0.0330834	0.0838965	3.25184	up	protein_coding	NM_001008394	CCDS53822.1	EID3	RefSeq	1486	chr12	+	104697509	104698982	GGCAGCTTTTGAAATTTCTGAGGCTATGATTACATACTCCTCATACTAAAGATTTCTTAG	493861	EP300-interacting inhibitor of differentiation 3	5.25458	3.55332
ASHGA5P004429	0.0278954	0.076406	3.24917	up	protein_coding	NM_014297	CCDS12622.1	ETHE1	RefSeq	978	chr19	-	44010870	44031396	TCAAAATCATGGGCAACCTGAACTTGCCTAAACCTCAGCAGATAGACTTTGCTGTTCCAG	23474	"protein ETHE1, mitochondrial"	6.19664	4.49657
ASHGA5P011743	0.024986	0.0721092	3.24703	up	protein_coding	NM_004096	CCDS7303.1	EIF4EBP2	RefSeq	7531	chr10	+	72163860	72188374	AACAACTTGAACAATCACGACAGGAAACATGCAGTTGGGGATGATGCTCAGTTCGAGATG	1979	eukaryotic translation initiation factor 4E-binding protein 2	5.40384	3.70472
ASHGA5P021410	0.0273256	0.0755468	3.24013	up	protein_coding	NM_001146169	CCDS53476.1	TATDN3	RefSeq	2575	chr1	+	212965169	212990167	CAGAAAAACAGCAGAATATATTGCCCAGGTGAAAGGGATCTCAGTGGAAGAAGTTATAGA	128387	putative deoxyribonuclease TATDN3 isoform 3	5.48372	3.78767
ASHGA5P006089	0.0436219	0.0978716	3.23848	up	protein_coding	NM_001002264	CCDS31964.1	EPSTI1	RefSeq	3201	chr13	-	43460523	43566407	GGCACCTAAGGGTATATGAGAAAATATTGACTCCTATCTGGCCTTCATCAACTGACCTCG	94240	epithelial-stromal interaction protein 1 isoform 1	5.94429	4.24897
ASHGA5P002418	0.0105727	0.0425322	3.23016	up	protein_coding	NM_004507	CCDS34635.1	HUS1	RefSeq	3033	chr7	-	48002884	48019222	GAACCACTTCACACGAATCAGTAACATGATAGCCAAGCTTGCCAAAACCTGCACCCTCCG	3364	checkpoint protein HUS1	5.53666	3.84506
ASHGA5P034474	0.0273313	0.0755468	3.22999	up	protein_coding	NM_152262	CCDS12268.1	ZNF439	RefSeq	2566	chr19	+	11976843	11980306	GGAAACCCTATGAATGTAAGCAATGTGGCAAAAGCTTTCACTTCTTCCAGTTCTTTTCAA	90594	zinc finger protein 439	6.44069	4.74916
ASHGA5P046796	0.0222103	0.0671329	3.22579	up	protein_coding	NM_172247	CCDS35192.1	CSF2RA	RefSeq	1590	chrY	+	1351570	1378828	CCTCCGCGACACGGGGGAACTGTTTTCTTGATGATGCTGTGAACCTTTATATCATTTTCT	1438	granulocyte-macrophage colony-stimulating factor receptor subunit alpha isoform c precursor	6.47683	4.78718
ASHGA5P002594	0.0466312	0.101546	3.22372	up	protein_coding	NM_013269	CCDS8602.1	CLEC2D	RefSeq	5284	chr12	+	9822303	9852151	AATGGATAAATGGTACTGAATGGACAAGACAGTTTCCTATCCTGGGAGCAGGAGAGTGTG	29121	C-type lectin domain family 2 member D isoform 1	5.69795	4.00923
ASHGA5P005475	0.0497141	0.105442	3.2231	up	protein_coding	NM_014078	CCDS6332.1	MRPL13	RefSeq	1119	chr8	-	121408082	121457647	CATGCACTGAGTGACTGTGGGGATCATGTTGTTATAATGAACACAAGACACATTGCATTT	28998	"39S ribosomal protein L13, mitochondrial"	5.19011	3.50166
ASHGA5P010839	0.0431316	0.0972944	3.22069	up	protein_coding	ENST00000367819	CCDS1273.1	XCL2	GENCODE	565	chr1	-	168510002	168513235	GAGCAGTAATTTTTATTACCAAACGTGGCCTAAAAGTCTGTGCTGATCCACAAGCCACGT	6846	chemokine (C motif) ligand 2 [Source:HGNC Symbol;Acc:10646]	5.35688	3.66951
ASHGA5P006787	0.0329895	0.0837857	3.21522	up	protein_coding	NM_001040031	CCDS46139.1	CD37	RefSeq	1229	chr19	+	49838676	49843861	CCTACTCGAGCTCGGGTTCATGACGCTCTCGATATTCCTGTGCAGAAACCTGGACCACGT	951	leukocyte antigen CD37 isoform B	5.54201	3.85709
ASHGA5P042896	0.0453796	0.099996	3.21353	up	protein_coding	NM_006854	CCDS5351.1	KDELR2	RefSeq	2874	chr7	-	6500711	6523849	TGGCCGGCGTAGTCCAGACCATCCTATACTGTGACTTCTTCTACTTGTACATTACAAAAG	11014	ER lumen protein retaining receptor 2 isoform 1	5.17323	3.48907
ASHGA5P001178	0.00359147	0.0227668	3.2113	up	protein_coding	NM_032635	CCDS12466.1	TMEM147	RefSeq	909	chr19	+	36036501	36038429	TATTATGTCCCGCTGCATTCCCCTATGGGTCGGAGCCCGGGGCATTGAGTTTGACTGGAA	10430	transmembrane protein 147 isoform 1	7.14763	5.46448
ASHGA5P013443	0.016415	0.0558515	3.20235	up	protein_coding	NM_001037738	CCDS43399.1	NPM1	RefSeq	1347	chr5	+	170814707	170833731	TATAGAAAAAGCGCATTGAACAGTCCTGGGCACTACATGTAAATTAAGCCCAAAGATGGG	4869	nucleophosmin isoform 3	7.34397	5.66484
ASHGA5P038165	0.0331424	0.0839379	3.19743	up	protein_coding	ENST00000322716	CCDS46790.1	EPM2AIP1	GENCODE	7439	chr3	-	37027356	37034795	ACAACTTTTCTATTGCAACTTGCCTAGGGACTTTGGTTTAGATCATAGGTTGGCCATGAT	9852	EPM2A (laforin) interacting protein 1 [Source:HGNC Symbol;Acc:19735]	5.59565	3.91874
ASHGA5P035353	0.000140632	0.00351132	3.19597	up	protein_coding	NM_013358	CCDS178.1	PADI1	RefSeq	3847	chr1	+	17531620	17572501	TGACATTGAAAGCCAACTGCAAGCTGACCATCTGCCCTCAAGTTGAAAATCGAAATGACC	29943	protein-arginine deiminase type-1	4.97614	3.29988
ASHGA5P006123	0.0204203	0.0637126	3.19591	up	protein_coding	NM_001127505	CCDS47813.1	ASAH1	RefSeq	2485	chr8	-	17913924	17942507	AGGACTGCAGAAAATCAACCTATCCTCCTTCAGGACCAACTGTCTTCCCTGCTGTTATAA	427	acid ceramidase isoform c	7.92316	6.24693
ASHGA5P002046	0.000719557	0.00922441	3.19519	up	protein_coding	NM_002488	CCDS4234.1	NDUFA2	RefSeq	726	chr5	-	140024947	140027370	GCCCGCTACGCATTTGGCCAAGAGACGAATGTCCCTTTGAACAACTTCAGTGCTGATCAG	4695	NADH dehydrogenase [ubiquinone] 1 alpha subcomplex subunit 2 isoform 1	8.55133	6.87543
ASHGA5P007364	0.000518667	0.00777009	3.19263	up	protein_coding	NM_005076	CCDS1449.1	CNTN2	RefSeq	7670	chr1	+	205012339	205047171	TCCTCTTCAGCTTGGAGTTCAGCCCTGGGATCCCAAACCACCTTCGGGCCTGTCTTTGAA	6900	contactin-2 precursor	5.0167	3.34196
ASHGA5P019731	2.88e-09	4.317e-06	3.18927	up	protein_coding	NM_001163692	CCDS53948.1	UBAP1L	RefSeq	1399	chr15	-	65385341	65398697	CCTGAGCCAGTTTCTCAGCTACCTCAGTGCCTGTGACCGCCTGTTACGTCAGGGATATGA	390595	ubiquitin-associated protein 1-like	5.5073	3.83408
ASHGA5P007859	0.0167411	0.0565695	3.18847	up	protein_coding	NM_003913	CCDS4488.1	PRPF4B	RefSeq	7482	chr6	+	4021568	4065217	CGCTACGGGAGCAGCCAGAGATGGAAGATGCTAATTCTGAAAAGAGTATAAATGAAGAAA	8899	serine/threonine-protein kinase PRP4 homolog	5.03566	3.3628
ASHGA5P008478	0.0185004	0.0599822	3.18396	up	protein_coding	NM_001220769		IKZF1	RefSeq	5830	chr7	+	50344377	50472798	ACAGCAAAGCTCCAAGAGTGACAGAGTCGTGGGAGAACGGCCCTTCCAGTGCAATCAGTG	10320	DNA-binding protein Ikaros isoform 6	5.28648	3.61566
ASHGA5P006944	0.0109972	0.043727	3.18166	up	protein_coding	NM_005360	CCDS10928.1	MAF	RefSeq	2656	chr16	-	79627744	79634622	AGTTTTTCATAACTGAGCCCACTCGCAAGTTGGAGCCATCAGTGGGATACGCCACATTTT	4094	transcription factor Maf isoform a	6.82041	5.15062
ASHGA5P017136	0.0338971	0.0849262	3.18035	up	protein_coding	NM_207118	CCDS5256.1	GTF2H5	RefSeq	7503	chr6	+	158589378	158620376	TTATAGAATGTGATCCTGCCATGAAGCAGTTTCTGCTGTACTTGGATGAGTCCAATGCCC	404672	general transcription factor IIH subunit 5	5.38474	3.71556
ASHGA5P010877	0.0359259	0.0876569	3.17847	up	protein_coding	NM_004550	CCDS1224.1	NDUFS2	RefSeq	2059	chr1	+	161169104	161184184	TGTCGTTGCCATCATAGGTACCCAAGATATTGTATTTGGAGAAGTAGATCGGTGAGCAGG	4720	"NADH dehydrogenase [ubiquinone] iron-sulfur protein 2, mitochondrial isoform 1 precursor"	6.32566	4.65733
ASHGA5P000913	0.0298915	0.0791744	3.17415	up	protein_coding	NM_172002	CCDS13845.1	HSCB	RefSeq	1106	chr22	+	29138042	29153496	ACTGTACCTTCTAAAGCTCCATGGAATAGAGATTCCTGAAAGGACAGATTATGAAATGGA	150274	"iron-sulfur cluster co-chaperone protein HscB, mitochondrial precursor"	5.12588	3.45952
ASHGA5P007477	0.0289099	0.0777181	3.17027	up	protein_coding	NM_001006607	CCDS42353.1	LRRC37A2	RefSeq	5175	chr17	+	44590075	44633014	GGAGAGTCAGGATGGACTTTCCTCATTTGGACAGCCGCTCTGGTTTAAAGATATGTACAA	474170	leucine-rich repeat-containing protein 37A2 precursor	6.73564	5.07103
ASHGA5P033611	4.6563e-07	0.000112937	3.16819	up	protein_coding	NM_015846	CCDS11943.1	MBD1	RefSeq	3284	chr18	-	47795215	47808144	TGGACACCAGGCACAGCTGTCCTGACTTCTCCCGTATTGGTGCCTGGCTGCCCTAGCAAG	4152	methyl-CpG-binding domain protein 1 isoform 1	4.94737	3.28371
ASHGA5P049197	4.27e-08	1.8124e-05	3.16453	up	protein_coding	NM_018941	CCDS5956.1	CLN8	RefSeq	7185	chr8	+	1711869	1734736	ACCACGTTGCTCCTGGAGATGAGCACGCCCTTTACCTGCGTTTCCTGGATGCTCTTAAAG	2055	protein CLN8	4.89184	3.22985
ASHGA5P006914	1.7176e-07	5.3022e-05	3.15561	up	protein_coding	NM_015197	CCDS32168.1	PACS2	RefSeq	6667	chr14	+	105780751	105864484	GAGCCAGCTACAGATCCCCAGGAAGACTGTGTATGACCAGCTCAACCACATCCTCATCTC	23241	phosphofurin acidic cluster sorting protein 2 isoform 2	4.97888	3.32097
ASHGA5P036905	3.687e-08	1.7885e-05	3.15521	up	protein_coding	NM_024958	CCDS12996.1	NRSN2	RefSeq	2402	chr20	+	327369	335512	TTCTGTGCAGACTATCCAGCCCAAGAGGGACTCCTGAGCTGCCCACATGGCCTAAGATGT	80023	neurensin-2	4.27867	2.62093
ASHGA5P002387	0.00075821	0.00948166	3.15219	up	protein_coding	NM_080424	CCDS2475.1	SP110	RefSeq	2591	chr2	-	231033644	231084827	GGACCAGCTGAAATGTGAGTTCCTCCTCTTGAAGGCCTACTGTCATCCACAAAGCTCCTT	3431	sp110 nuclear body protein isoform c	4.99869	3.34234
ASHGA5P051048	0.00499822	0.0276505	3.14151	up	protein_coding	NM_022106	CCDS13484.1	FAM217B	RefSeq	5053	chr20	+	58515443	58523702	AAGAAAAACTTAAAGAAAGCATTTCCCCGGAAGCAAGACGCAAAAGGAATCCACTCGGTT	63939	protein FAM217B isoform 1	4.85334	3.20188
ASHGA5P043785	0.0478034	0.102911	3.14127	up	protein_coding	NM_004126	CCDS5634.1	GNG11	RefSeq	964	chr7	+	93551015	93555826	GGAAAAACTGAAAATGGAAGTTGAGCAGCTTCGCAAAGAAGTGAAGTTGCAGAGACAACA	2791	guanine nucleotide-binding protein G(I)/G(S)/G(O) subunit gamma-11 precursor	6.42107	4.76972
ASHGA5P002426	0.00017873	0.00406672	3.13219	up	protein_coding	NM_021214	CCDS45323.1	FAM108C1	RefSeq	2408	chr15	+	80987651	81047962	TGCGCACCCGGTATGGCGTGAGTCCCGAGAACATTATCCTCTATGGTCAGAGCATTGGGA	58489	abhydrolase domain-containing protein FAM108C1	6.71158	5.06441
ASHGA5P002595	0.0378634	0.0902731	3.1309	up	protein_coding	NM_001004419	CCDS31741.1	CLEC2D	RefSeq	5366	chr12	+	9822303	9852151	AAAGGTTTCACAAGTTCCTCGAATGAATCCAAGACCTGTCATGGTTTCCTATCCTGGGAG	29121	C-type lectin domain family 2 member D isoform 2	5.80131	4.15473
ASHGA5P053885	0.0331648	0.0839379	3.12742	up	protein_coding	NM_153200	CCDS7012.1	EDF1	RefSeq	538	chr9	-	139757232	139760738	ATACCCAATAACCAGGTGCTTGGCAAAATCGAGCGGGCCATTGGTGAGTGTCCCTCCACC	8721	endothelial differentiation-related factor 1 isoform beta	7.1639	5.51893
ASHGA5P014537	4.29829e-05	0.00178721	3.12247	up	protein_coding	ENST00000409858	CCDS7028.2	UAP1L1	GENCODE	3365	chr9	+	139971952	139978990	GAGGAGGAAGGTTTCCGTCAGATTTCTCTGAACAAGGTGGCCGTCCTGCTGCTGGCTGGG	91373	UDP-N-acteylglucosamine pyrophosphorylase 1-like 1 [Source:HGNC Symbol;Acc:28082]	4.30269	2.66
ASHGA5P005665	0.0187454	0.0603537	3.1195	up	protein_coding	NM_001137550	CCDS46551.1	LRRFIP1	RefSeq	4109	chr2	+	238536223	238690290	AAAGATAGGGGCATTAGAGAGGCAGAAAGAGTTCTTTGATTCCGTAAGGAGTGAACGGGA	9208	leucine-rich repeat flightless-interacting protein 1 isoform 1	6.29124	4.64993
ASHGA5P000927	4.03e-09	4.562e-06	3.1179	up	protein_coding	NM_000967	CCDS13988.1	RPL3	RefSeq	1348	chr22	-	39708886	39715670	TTTGATGGCGTGATGTCTCACAGAAAGTTCTCCGCTCCCAGACATGGGTCCCTCGGCTTC	6122	60S ribosomal protein L3 isoform a	6.117	4.47642
ASHGA5P010663	3.39e-09	4.317e-06	3.11694	up	protein_coding	NM_005618	CCDS5313.1	DLL1	RefSeq	3366	chr6	-	170591293	170599697	TGAGAAGAAAATTGACTACTGCAGCTCTTCACCCTGTTCTAATGGTGCCAAGTGTGTGGA	28514	delta-like protein 1 precursor	4.52926	2.88913
ASHGA5P053038	0.0272562	0.0754984	3.11681	up	protein_coding	NM_015483	CCDS34614.1	KBTBD2	RefSeq	3710	chr7	-	32907777	32931468	GTACGATTGTTGAGTTTTGCTGATCTCTTCAGTTGTGAGGAATTAAAACAGAGTGCTAAA	25948	kelch repeat and BTB domain-containing protein 2	5.03026	3.39019
ASHGA5P001673	0.0155136	0.0539209	3.11655	up	protein_coding	NM_003467	CCDS46420.1	CXCR4	RefSeq	1691	chr2	-	136871918	136875725	ACCAGCGGTTACCATGGAGGGGATCAGTATATACACTTCAGATAACTACACCGAGGAAAT	7852	C-X-C chemokine receptor type 4 isoform b	4.54416	2.90422
ASHGA5P009988	0.0371151	0.0891094	3.11445	up	protein_coding	ENST00000358465	CCDS872.1	TRIM33	GENCODE	8339	chr1	-	114935398	115053781	TAATTTGAAGGCTGATTCAGAAGTAGCTCAGGCAGGGAAAGCAGTTGCATTGTACTTTGA	51592	tripartite motif containing 33 [Source:HGNC Symbol;Acc:16290]	7.17699	5.53801
ASHGA5P036061	0.0138771	0.050506	3.11323	up	protein_coding	NM_023016	CCDS33270.1	SOWAHC	RefSeq	4681	chr2	+	110371910	110376564	CTTGGAGTCTAGGTTGCCTTGTCTCTCCTATTTTTAAATAAGTGAAATTTGGGAGATTGT	65124	ankyrin repeat domain-containing protein SOWAHC	6.30398	4.66556
ASHGA5P012437	0.0326863	0.0834241	3.11074	up	protein_coding	NM_024120	CCDS13118.1	NDUFAF5	RefSeq	2311	chr20	+	13765671	13799067	GATTTACAAGGTATGGGTGAGAGTAACTGTGCTTGGAATAGAAAAGCCCTGCTGCATCGA	79133	NADH dehydrogenase [ubiquinone] 1 alpha subcomplex assembly factor 5 isoform 1	5.7093	4.07204
ASHGA5P018459	0.0184486	0.0599055	3.10808	up	protein_coding	NM_153201	CCDS44754.1	HSPA8	RefSeq	1872	chr11	-	122928199	122932901	AAGTTTGAACTCACAGGCATGCCAGGAGGAATGCCTGGGGGATTTCCTGGTGGTGGAGCT	3312	heat shock cognate 71 kDa protein isoform 2	7.33361	5.69759
ASHGA5P056145	0.0249873	0.0721092	3.1013	up	protein_coding	NM_003384	CCDS9947.1	VRK1	RefSeq	1720	chr14	+	97263683	97347951	AAGACCCCAAAAGATGTCACGATGGCACTATTGAATTCACGAGCATCGATGCACACAATG	7443	serine/threonine-protein kinase VRK1	5.6998	4.06693
ASHGA5P013050	6.9e-09	6.39e-06	3.09732	up	protein_coding	NM_001190326	CCDS54501.1	DGCR8	RefSeq	4437	chr22	+	20067754	20099400	TTTGAATGTGCCCGAGCTACACTGGAAATCCTCATCCCTGACTTTGTTAAACAGACCTCT	54487	microprocessor complex subunit DGCR8 isoform 2	4.69097	3.05995
ASHGA5P028824	0.00155328	0.0141405	3.09502	up	protein_coding	ENST00000218721	CCDS9414.1	MLNR	GENCODE	1239	chr13	+	49794473	49796513	ATCAACCCAATCCTCTACAACCTCATTTCAAAGAAGTACAGAGCGGCGGCCTTTAAACTG	2862	motilin receptor [Source:HGNC Symbol;Acc:4495]	4.57918	2.94923
ASHGA5P028421	0.03521	0.0867015	3.0949	up	protein_coding	NM_001042414	CCDS41870.1	PSPC1	RefSeq	2031	chr13	-	20277008	20357159	AGGCCCTAATAAGCGTCGTAGATATTAAACATTCGTTCATTCCTGGCTATCTAGAAAAAA	55269	paraspeckle component 1	6.40122	4.77133
ASHGA5P011735	4.1162e-07	0.000107517	3.09466	up	protein_coding	NM_018344	CCDS7310.1	SLC29A3	RefSeq	2277	chr10	+	73079009	73123147	AGGACCCTGAGGGCTCAGACATCCTGAACTACTTTGAGAGCTACCTTGCCGTTGCCTCCA	55315	equilibrative nucleoside transporter 3 isoform a	4.7703	3.14052
ASHGA5P054220	0.0263903	0.0739784	3.09381	up	protein_coding	ENST00000329134	CCDS14785.1	UTY	GENCODE	4325	chrY	-	15434913	15592550	TAAACTTTTAAAAATGTAAGCAAAATTACAGTATGTAAAACACACATTGCTAATGGAGAA	7404	"ubiquitously transcribed tetratricopeptide repeat gene, Y-linked [Source:HGNC Symbol;Acc:12638]"	5.64793	4.01855
ASHGA5P017849	0.0275206	0.0758119	3.08754	up	protein_coding	NM_033294	CCDS8331.1	CASP1	RefSeq	968	chr11	-	104896236	104905884	TGCCGTGGTGATAATGTTTCTTGGAGACATCCCACAATGGGCTCTGTTTTTATTGGAAGA	834	caspase-1 isoform delta	7.34649	5.72003
ASHGA5P048932	0.0107902	0.0430889	3.08675	up	protein_coding	NM_018445	CCDS53979.1	VIMP	RefSeq	1250	chr15	-	101812389	101817700	TAAGAATCTTGTTAGTGTCACTTTTGACATTAGCAAGATGAACCCTTAACCCTCGATTCA	55829	selenoprotein S	6.84253	5.21643
ASHGA5P013002	0.0219362	0.0665099	3.08523	up	protein_coding	NM_016003	CCDS34593.1	WIPI2	RefSeq	4435	chr7	+	5229834	5273486	AGGACAACACGTCCCTAGCTGTTGGTAGTAAGTCCGGTTATAAATTTTTCTCCCTTTCTT	26100	WD repeat domain phosphoinositide-interacting protein 2 isoform b	6.24125	4.61587
ASHGA5P008024	0.00404082	0.0245169	3.08488	up	protein_coding	NM_018288	CCDS5308.2	PHF10	RefSeq	1692	chr6	-	170104001	170124106	ATCATACTTTTTGTGTGGGCCTTGGTGCTATTCCATCAGGTCGCTGGATTTGTGACTGTT	55274	PHD finger protein 10 isoform a	9.83051	8.20529
ASHGA5P005565	0.0177848	0.0586424	3.08245	up	protein_coding	NM_013374	CCDS2660.1	PDCD6IP	RefSeq	5972	chr3	+	33840062	33911199	ATGCTTTCAAACAGTGTCAATACAAAGATACTCTCCCCAAGGAGGTGTTCCCTGTCTTGG	10015	programmed cell death 6-interacting protein isoform 1	6.28682	4.66274
ASHGA5P020064	0.0262039	0.0738076	3.08177	up	protein_coding	NM_001130929	CCDS55168.1	C7orf73	RefSeq	2515	chr7	+	135347220	135361160	CTGGCTCAGAACTATGATATACCAAACCTGGCTAAAAAACTTGAAGAAATTAAAAAGGAC	647087	uncharacterized protein C7orf73 precursor	7.11833	5.49457
ASHGA5P055914	0.00105241	0.0112261	3.07365	up	protein_coding	NM_001130706	CCDS9583.1	C14orf93	RefSeq	2213	chr14	-	23456109	23479360	TCTAAGCATGGCACCAAAGCCAACCGTGTGTATGGGCCTCCCTCAGACAGACTGCCTTCT	60686	uncharacterized protein C14orf93 precursor	6.61637	4.99641
ASHGA5P014591	0.0272397	0.0754872	3.07122	up	protein_coding	NM_030984	CCDS5856.1	TBXAS1	RefSeq	1919	chr7	+	139528951	139720125	ACCCTGAAAGGTACCGCTGCAGCTAGAATCCAAATCTGCCCTAGGTCCAAAAAATGGTGT	6916	thromboxane-A synthase isoform 2	6.3546	4.73579
ASHGA5P054560	6.231e-08	2.267e-05	3.06899	up	protein_coding	NM_006459	CCDS7487.2	ERLIN1	RefSeq	3450	chr10	-	101909846	101945734	TTTCTCCCGCTCCCAGGAGGAACGAGAATGAATATGACTCAAGCCCGGGTTCTGGTGGCT	10613	erlin-1	6.03134	4.41358
ASHGA5P055022	0.00259918	0.0188579	3.06803	up	protein_coding	NM_176072	CCDS8219.1	P2RY2	RefSeq	2681	chr11	+	72929343	72947395	TTCCCTGCAGGGCGATGGCAGCAGACCTGGGCCCCTGGAATGACACCATCAATGGCACCT	5029	P2Y purinoceptor 2	4.75141	3.13409
ASHGA5P032985	0.0340261	0.0851136	3.06745	up	protein_coding	NM_000984	CCDS11241.1	RPL23A	RefSeq	979	chr17	+	27046999	27051374	TAACAAGCTGTACAAGAACCCCTTTTATCCCTGGAAGAGGCTGTGTATGAAACCAATGCC	6147	60S ribosomal protein L23a	8.7954	7.17837
ASHGA5P041478	0.0261441	0.0737735	3.06279	up	protein_coding	NM_006118	CCDS1064.1	HAX1	RefSeq	1196	chr1	+	154245038	154248355	TATTCCTGGGACGTTGGTTCCGGTCCCGGTAGCCTTGTTAACCCTCAGAGGCCTTCAAGT	10456	HCLS1-associated protein X-1 isoform a	7.70941	6.09457
ASHGA5P002006	0.000422802	0.00686935	3.06259	up	protein_coding	NM_001070	CCDS11433.1	TUBG1	RefSeq	1968	chr17	+	40761357	40767256	ACACCAGCATCTCCTCGCTCTTCGAGAGAACCTGTCGCCAGTATGACAAGCTGCGTAAGC	7283	tubulin gamma-1 chain	5.57897	3.96421
ASHGA5P005095	9.5345e-06	0.0007062	3.05895	up	protein_coding	ENST00000301246	CCDS12511.1	C19orf33	GENCODE	461	chr19	+	38794803	38795646	GGGTCCAAAGCAAGGACACCACAGCTCTTCCGACTCCAGCAGCAGCTCCAGCGATTCGGA	64073	chromosome 19 open reading frame 33 [Source:HGNC Symbol;Acc:16668]	6.19945	4.58641
ASHGA5P053684	0.0261223	0.0737735	3.05745	up	protein_coding	NM_001001790	CCDS43803.1	TOMM5	RefSeq	773	chr9	-	37588411	37592636	CAGAGCCGCGATGTTCCGGATTGAGGGCCTCGCGCCGAAGCTGGACCCGGAGGAGATGAA	401505	mitochondrial import receptor subunit TOM5 homolog isoform 1	5.84743	4.2351
ASHGA5P014013	0.0277469	0.0761962	3.05512	up	protein_coding	NM_004671	CCDS32824.1	PIAS2	RefSeq	4427	chr18	-	44390022	44497495	TCAAGCATGTCATCAGATTTGCCAGGTTTGGATTTTCTTTCCCTTATTCCAGTTGATCCC	9063	E3 SUMO-protein ligase PIAS2 isoform beta	5.06277	3.45154
ASHGA5P051184	0.0392867	0.0920878	3.05269	up	protein_coding	NM_001696	CCDS13745.1	ATP6V1E1	RefSeq	1406	chr22	-	18074902	18111588	ACTAAGCCTTCAGGAGGTGGAGCTCGTCGTCAGCTCTCCTGCTGTGATGTGGAAGCTTCT	529	V-type proton ATPase subunit E 1 isoform a	5.51357	3.90349
ASHGA5P001307	1.04924e-06	0.000179515	3.0521	up	protein_coding	NM_001814	CCDS8282.1	CTSC	RefSeq	1924	chr11	-	88026759	88070941	AAATCCCAAGGCCCAAACCTGCACCACTGACTGCTGAAATACAGCAAAAGATTTTGCATT	1075	dipeptidyl peptidase 1 isoform a preproprotein	5.60674	3.99694
ASHGA5P010875	0.000481023	0.00748745	3.05193	up	protein_coding	NM_001077481	CCDS41428.1	NR1I3	RefSeq	1285	chr1	-	161199455	161208000	GGAGCCCGTGCTCCCTATCTTACAGACCGACCTGGAGTTACCCAGAGAGATGAGATTGAT	9970	nuclear receptor subfamily 1 group I member 3 isoform 4	4.80649	3.19677
ASHGA5P007127	0.0060449	0.0303946	3.04915	up	protein_coding	NM_001130059	CCDS44905.1	ATF7	RefSeq	6600	chr12	-	53905842	53994805	GAAAAAGGCAAGAAGCAGGACTGTTGCCAAAAAACTGGTGGCTGCTGCTGGGCCCCTTGA	11016	cyclic AMP-dependent transcription factor ATF-7 isoform 1	6.17551	4.5671
ASHGA5P054079	0.0034017	0.022058	3.04592	up	protein_coding	NM_001006613	CCDS14507.1	WBP5	RefSeq	1023	chrX	+	102611379	102613397	CGTTGGAAGGTTAATCGAAACCATCCTTACCCCTATTTAATGTAGTTTACCTTGATTTTT	51186	WW domain-binding protein 5	4.88727	3.28039
ASHGA5P010655	0.000289821	0.00540734	3.0448	up	protein_coding	ENST00000366691	CCDS1575.1	RHOU	GENCODE	4372	chr1	+	228870823	228882416	CACCGAGTACATCCCTACTGCCTTCGACAACTTCTCCGCGGTGGTGTCTGTGGATGGGCG	58480	ras homolog family member U [Source:HGNC Symbol;Acc:17794]	5.6563	4.04995
ASHGA5P012722	0.0342423	0.0853218	3.04168	up	protein_coding	NM_052818	CCDS9345.2	N4BP2L1	RefSeq	3051	chr13	-	32974859	33002315	AGTTAGCAAGAAGAAACATTCATGGTGTCTCAAGAGAAAAAATCCACCGAATGAAAGAAC	90634	NEDD4-binding protein 2-like 1 isoform 1	5.7186	4.11373
ASHGA5P001989	0.0298173	0.0791219	3.04042	up	protein_coding	NM_024057	CCDS9089.1	NUP37	RefSeq	1228	chr12	-	102467972	102512361	CTCGGTCCAGTTATCCTCAAAATAAGAGACCTGTTCACATGGATCGAGCCTGCTTATTCA	79023	nucleoporin Nup37	5.03755	3.43328
ASHGA5P011774	0.0301793	0.0794206	3.03788	up	protein_coding	NM_138493	CCDS34441.1	CCDC167	RefSeq	637	chr6	-	37450696	37467700	CAGCCTAATGAACAAAGCCTCCAACTACGAGAAGGAACTGAAGTTTCTTCGGCAAGAGAA	154467	coiled-coil domain-containing protein 167	5.27097	3.6679
ASHGA5P005836	0.00267636	0.019173	3.03717	up	protein_coding	NM_016100	CCDS13141.1	NAA20	RefSeq	1102	chr20	+	19997933	20014273	TTTACCTGCGACGACCTGTTCCGCTTCAACAACATTAACTTGGATCCACTTACAGAAACT	51126	N-alpha-acetyltransferase 20 isoform a	5.17355	3.57082
ASHGA5P022006	1.41672e-06	0.000207176	3.03597	up	protein_coding	NM_001204068		ANKS1B	RefSeq	3639	chr12	-	99137751	99548577	CCCCGCGTTAGCATTCGCAAGTCCGTGCCTTTCTGTTTTAAAGCAGATCGACCCATCTGA	56899	ankyrin repeat and sterile alpha motif domain-containing protein 1B isoform g	4.94754	3.34538
ASHGA5P004350	0.0361183	0.0878139	3.03574	up	protein_coding	NM_002796	CCDS996.1	PSMB4	RefSeq	925	chr1	+	151372040	151374412	ATACTTGGCTCAGCCTCTGCTGCGAGAAGTTCTGGAGAAGCAGCCAGTGCTAAGCCAGAC	5692	proteasome subunit beta type-4	6.3177	4.71565
ASHGA5P003563	0.0217296	0.0661761	3.03543	up	protein_coding	NM_002798	CCDS11056.1	PSMB6	RefSeq	849	chr17	+	4699438	4701798	AAGAGTGTCTGCAATTCACTGCCAATGCTCTCGCTTTGGCCATGGAGCGGGATGGCTCCA	5694	proteasome subunit beta type-6 isoform 1 proprotein	6.69388	5.09197
ASHGA5P043942	7.60542e-05	0.00242873	3.03491	up	protein_coding	ENST00000297534	CCDS5853.1	C7orf55	GENCODE	1210	chr7	+	139025877	139031065	AATGGCGGCCTTAGGGTCCCCGTCGCACACTTTTCGAGGACTTCTGCGGGAGTTGCGCTA	154791	chromosome 7 open reading frame 55 [Source:HGNC Symbol;Acc:26946]	7.45183	5.85017
ASHGA5P050935	0.0105757	0.0425322	3.03443	up	protein_coding	NM_000099	CCDS13158.1	CST3	RefSeq	818	chr20	-	23614293	23618574	TCAGGACGCCTAGGGGTCTGTACCGGGCTGGCCTGTGCCTATCACCTCTTATGCACACCT	1471	cystatin-C precursor	7.39927	5.79785
ASHGA5P008930	0.010343	0.0419277	3.02837	up	protein_coding	NM_006724	CCDS34566.1	MAP3K4	RefSeq	5351	chr6	+	161412821	161538417	AGGGATTCAGGGGTTCCAGCGTTCCTGAAAATGATCGATTGGCTTCCATAGCTGCTGAAT	4216	mitogen-activated protein kinase kinase kinase 4 isoform b	4.94693	3.34839
ASHGA5P011350	0.0254968	0.0726935	3.02315	up	protein_coding	NM_016046	CCDS7459.1	EXOSC1	RefSeq	1150	chr10	-	99195665	99205768	GAAAAAGACAAGGTTGAAATTTATAAGAGTTTCCGCCCAGGTGACATTGTCTTGGCCAAA	51013	exosome complex component CSL4	4.91103	3.31497
ASHGA5P012838	0.0224216	0.0675154	3.02237	up	protein_coding	NM_005869	CCDS3982.2	CWC27	RefSeq	2093	chr5	+	64064754	64314590	GGAAGATCAGACCCTTGCACTGCTGAACCAGTTTAAATCTAAACTCACTCAAGCAATTGC	10283	peptidyl-prolyl cis-trans isomerase CWC27 homolog	8.41357	6.81789
ASHGA5P006259	0.00124749	0.0125018	3.02207	up	protein_coding	NM_001009899	CCDS43133.1	KIAA2018	RefSeq	13708	chr3	-	113367232	113415493	TCTGCAAGCCCTTAGGTTCCTATTACTGTAACCATGCCAGAAATGACAGAGAATGAGACG	205717	basic helix-loop-helix domain-containing protein KIAA2018	4.54508	2.94954
ASHGA5P054797	0.0191302	0.0611977	3.02127	up	protein_coding	NM_005898	CCDS31453.1	CAPRIN1	RefSeq	5562	chr11	+	34073229	34124157	CCCCCAAGACCCAACAGAGGGATGCCGCAAATGAACACTCAGCAAGTGAATTAATCTGAT	4076	caprin-1 isoform 1	7.58686	5.9917
ASHGA5P006873	0.00899558	0.0385357	3.02099	up	protein_coding	NM_032309	CCDS2098.1	CHCHD5	RefSeq	698	chr2	+	113342035	113346617	AACTGTGGAGGCACAGCCACTTCCTGCCTCCTGAGGACTCCTCTGACGGCAGGAAAACTG	84269	coiled-coil-helix-coiled-coil-helix domain-containing protein 5	5.42214	3.82712
ASHGA5P010238	6.39208e-06	0.000571194	3.02074	up	protein_coding	NM_002735	CCDS34579.1	PRKAR1B	RefSeq	2512	chr7	-	588833	752161	GCCTCCTGGCCTCGGGCGCCGCGCATCCAGGAAGGAAGCAGCCACCCTCGCCATGGCCTC	5575	cAMP-dependent protein kinase type I-beta regulatory subunit	6.05172	4.45682
ASHGA5P012225	0.0255109	0.0726935	3.01947	up	protein_coding	NM_138346	CCDS141.1	KIAA2013	RefSeq	2832	chr1	-	11979644	11986485	CAGGAGTAAGGAAGATCCCAGTGTCTGAGTGAACTAACAGTCCTGCTTTCAGCCACCATT	90231	uncharacterized protein KIAA2013 precursor	6.67948	5.08519
ASHGA5P021866	0.00430818	0.0254863	3.00989	up	protein_coding	NM_001160125	CCDS53490.1	KLF6	RefSeq	4555	chr10	-	3818187	3827473	AAGCTCCCACTTGAAAGCACACCAGCGGACGCACACAGGTGTTTTTCCAGGTCTGACCAC	1316	Krueppel-like factor 6 isoform C	5.75446	4.16475
ASHGA5P003899	0.0360012	0.0877168	3.0037	up	protein_coding	NM_001997	CCDS8095.1	FAU	RefSeq	579	chr11	-	64888098	64889672	CTCCATCTTCGCGGTAGCTGGGACCGCCGTTCAGTCGCCAATATGCAGCTCTTTGTCCGC	2197	ubiquitin-like protein fubi and ribosomal protein S30 precursor	6.0496	4.46286
ASHGA5P034698	0.0318083	0.0820955	2.99819	up	protein_coding	NM_004228	CCDS12722.1	CYTH2	RefSeq	4622	chr19	+	48972464	48985571	AACTGCTTTGAACTTTACATCCCCAACAACAAGGGGCAGCTCATCAAAGCCTGCAAAACT	9266	cytohesin-2 isoform 2	6.66968	5.08559
ASHGA5P041193	0.0248948	0.0719647	2.99736	up	protein_coding	NM_003248	CCDS4049.1	THBS4	RefSeq	3233	chr5	+	79331169	79379107	TCCTGCTGCACCTGGTCCTGCAGCGGTGGCTAGCGGCAGGCGCCCAGGCCACCCCCCAGG	7060	thrombospondin-4 precursor	9.46429	7.8806
ASHGA5P003333	0.0372799	0.0894114	2.99672	up	protein_coding	NM_033114	CCDS8740.1	ZCRB1	RefSeq	1844	chr12	-	42705887	42719932	TTTTTCCCTGACAAACAATGACTTGTACCGGATATTTTCCAAGTATGGCAAAGTTGTAAA	85437	zinc finger CCHC-type and RNA-binding motif-containing protein 1	6.4285	4.84511
ASHGA5P034515	0.0126985	0.0478842	2.99509	up	protein_coding	ENST00000263897	CCDS46011.1	USE1	GENCODE	856	chr19	+	17326154	17330638	TAGACCTCGTCCTGCAGCGACATCAGAACCTCCAGGAAAAGCTGGCGGAAGAGATGCTAG	55850	unconventional SNARE in the ER 1 homolog (S. cerevisiae) [Source:HGNC Symbol;Acc:30882]	7.33516	5.75255
ASHGA5P007197	0.0223864	0.0674505	2.99278	up	protein_coding	NM_213674	CCDS6586.1	TPM2	RefSeq	1182	chr9	-	35681989	35690053	GACCTAGAAGAGACCTTGGCCAGTGCCAAGGAGGAGAACGTCGAGATTCACCAGACCTTG	7169	tropomyosin beta chain isoform 2	6.4848	4.90331
ASHGA5P003270	0.0381128	0.0905762	2.99161	up	protein_coding	NM_003919	CCDS5637.1	SGCE	RefSeq	1709	chr7	-	94214535	94285521	ACAGCAGACTACAGGTAAATGGTATCCCTGAAGAAAGAAAACTGACTGAAGCAATGAATT	8910	epsilon-sarcoglycan isoform 2	5.2604	3.67947
ASHGA5P002935	0.00293959	0.0202472	2.99007	up	protein_coding	ENST00000263579	CCDS8473.1	DCPS	GENCODE	1479	chr11	+	126173646	126215644	ACCTATCACTTGTTCCCTCCAAGACAACTGAATGATGTAAAGACGACCGTGGTTTACCCT	28960	"decapping enzyme, scavenger [Source:HGNC Symbol;Acc:29812]"	4.7493	3.16912
ASHGA5P013673	0.0047492	0.0267522	2.98815	up	protein_coding	NM_005138	CCDS14095.1	SCO2	RefSeq	1005	chr22	-	50961996	50964034	CCGCCGCGAGGAGCATCAGATCCATGCTGCTGCTGACTCGGAGCCCCACAGCTTGGCACA	9997	"protein SCO2 homolog, mitochondrial precursor"	12.107	10.5278
ASHGA5P006478	0.0201852	0.0632197	2.98756	up	protein_coding	NM_006755	CCDS7712.1	TALDO1	RefSeq	1319	chr11	+	747431	765024	GCCAAGGCGGCCCAAGCCAGTGACCTGGAAAAAATCCACCTGGATGAGAAGTCTTTCCGT	6888	transaldolase	7.13047	5.55151
ASHGA5P013080	0.00792619	0.0355544	2.98714	up	protein_coding	NM_001003793	CCDS33724.1	RBMS3	RefSeq	8234	chr3	+	29322802	30051886	AGGATTATGATACTCCACCAGCTGTTGTGTCAGTATATGACTGCTGCTGCTCCTATGCAA	27303	"RNA-binding motif, single-stranded-interacting protein 3 isoform 1"	6.44426	4.8655
ASHGA5P009824	0.000107906	0.0029704	2.98062	up	protein_coding	NM_182616	CCDS42080.1	C15orf38	RefSeq	2128	chr15	-	90443831	90456222	CGAGGAGTGGGATGACTGAGGGACGTGGCTGCCTCTGGGGGCACCAGCACCTTCTGTAGC	348110	UPF0552 protein C15orf38	4.82991	3.2543
ASHGA5P012711	0.00120381	0.0122144	2.9794	up	protein_coding	ENST00000380067	CCDS11138.1	SLC25A35	GENCODE	2785	chr17	-	8191081	8198170	ACAGGGCAAGAACCGAGTCCCCAAGTTCTCAGCAACATCATGCAGTGCTTCAGCGCCTTT	399512	"solute carrier family 25, member 35 [Source:HGNC Symbol;Acc:31921]"	5.75017	4.17515
ASHGA5P018607	0.0101391	0.0413737	2.97825	up	protein_coding	ENST00000455511	CCDS9145.2	ANAPC7	GENCODE	3045	chr12	-	110810704	110841535	GCAATGGACCAGTATAGTATAGCACTAAGTTTGGACCCCAATGACCAGAAGTCTCTAGAG	51434	anaphase promoting complex subunit 7 [Source:HGNC Symbol;Acc:17380]	5.45679	3.88232
ASHGA5P010706	0.0375017	0.0896994	2.97825	up	protein_coding	NM_001042552	CCDS31019.1	TATDN3	RefSeq	2588	chr1	+	212965169	212990167	AGAAAAACAGGTACGGAATGAGCCCTGGAACATTTCTATTTCAGCAGAATATATTGCCCA	128387	putative deoxyribonuclease TATDN3 isoform 1	5.48358	3.90912
ASHGA5P048788	0.0194766	0.0617326	2.97768	up	protein_coding	NM_002675	CCDS45297.1	PML	RefSeq	2254	chr15	+	74287013	74335717	AAGACAGACCTCTGGTTTTCTTTGACCTCAAGATTGACAATGAAAGTGGGTTCTCCTGGG	5371	protein PML isoform 6	4.64492	3.07073
ASHGA5P011028	0.0286088	0.0773382	2.97713	up	protein_coding	NM_001007793	CCDS31306.1	BUB3	RefSeq	1555	chr10	+	124913759	124924886	CAAAACCCAAGTCCACCTAATCATCCTGTGAAAGTGGTTTCTCTATGGAAAGCTTTGTTT	9184	mitotic checkpoint protein BUB3 isoform b	7.03375	5.45983
ASHGA5P036455	4.3396e-07	0.000107823	2.97596	up	protein_coding	NM_014640	CCDS2422.1	TTLL4	RefSeq	4997	chr2	+	219575567	219620138	AATCACAACCCTGCCTGTGAATCTGTAATTGACTCCTCAGCATTTGGAGAAGGCAAAGCT	9654	tubulin polyglutamylase TTLL4	4.97419	3.40083
ASHGA5P010776	0.0146472	0.0520807	2.97493	up	protein_coding	NM_001042370	CCDS41450.2	TROVE2	RefSeq	2091	chr1	+	193029003	193060906	TGATACTGGAGCTCTGGATCCTTGCAAAATACCCTACTAAATAAATCATTTTAGACATGG	6738	60 kDa SS-A/Ro ribonucleoprotein isoform 3	7.08801	5.51515
ASHGA5P006344	0.0247178	0.0716168	2.97447	up	protein_coding	NM_197967	CCDS13749.1	BID	RefSeq	2147	chr22	-	18216905	18257261	ATTTTATTAACCAGAACCTACGCACCTACGTGAGGAGCTTAGCCAGAAATGGGATGGACT	637	BH3-interacting domain death agonist isoform 3	7.75208	6.17945
ASHGA5P002024	0.0357584	0.0873761	2.97431	up	protein_coding	ENST00000407724	CCDS48208.1	CYorf15A	GENCODE	864	chrY	+	21729234	21752308	GCTCTCTGTAAGAAATATGCTGATCTTGGAAATTCACCTCTTCTATAGAAGAGTTTGTTT		Putative gamma-taxilin 2 [Source:UniProtKB/Swiss-Prot;Acc:Q9BZA5]	5.94935	4.37679
ASHGA5P021385	0.001033	0.0111356	2.97408	up	protein_coding	NM_153647	CCDS45155.2	SLC24A4	RefSeq	9773	chr14	+	92789536	92967825	AGGGTCTCAGAGACGGCACCCAGGCGCTCCGGGATGGCGCTCCGCGGGACCCTCCGGCCG	123041	sodium/potassium/calcium exchanger 4 isoform 2	6.17073	4.59828
ASHGA5P049356	0.00350916	0.0224688	2.97319	up	protein_coding	NM_005153	CCDS45537.1	USP10	RefSeq	3399	chr16	+	84733554	84813527	CAGCCAGAGGGGGGCCCCGGGGCTGATTTTGGTCAGTCCTGCTTCCCTGCAGAGGCTGGC	9100	ubiquitin carboxyl-terminal hydrolase 10	5.55035	3.97833
ASHGA5P038006	0.0226283	0.0680183	2.97249	up	protein_coding	NM_014248	CCDS14009.1	RBX1	RefSeq	906	chr22	+	41347350	41369019	GTGGATACCCCGAGCGGCACCAACAGCGGCGCGGGCAAGAAGCGCTTTGAAGTGAAAAAG	9978	E3 ubiquitin-protein ligase RBX1	7.10514	5.53347
ASHGA5P010456	0.0335587	0.0844105	2.97104	up	protein_coding	NM_145806	CCDS7677.1	ZNF511	RefSeq	1098	chr10	+	135122422	135126666	ACAGACATAGAATACCCTCTACCATCTGCTTTGGTCAGGGTGCCGCTCGAGGATTTAAAA	118472	zinc finger protein 511	5.63947	4.0685
ASHGA5P029435	0.037428	0.0896283	2.9639	up	protein_coding	NM_001029991	CCDS41913.1	METTL17	RefSeq	1802	chr14	+	21457964	21465194	TGACCAAAATCAGTGGGATGTGGCAGGAAGCTGCAGCCCACGCCAGCATCTGTTTCCACA	64745	"methyltransferase-like protein 17, mitochondrial isoform 1 precursor"	5.65754	4.09004
ASHGA5P003042	0.0283645	0.0770741	2.96364	up	protein_coding	NM_005783	CCDS2044.1	TXNDC9	RefSeq	1556	chr2	-	99935486	99952860	CTTCTGACATTCTTAATTACAGTGGAAATTTAATGGAGCCACCATTTCAGAACCAAAAGA	10190	thioredoxin domain-containing protein 9	5.50877	3.9414
ASHGA5P010146	0.0472979	0.102246	2.96359	up	protein_coding	NM_001001486	CCDS33856.1	ATP2C1	RefSeq	3514	chr3	+	130613433	130735555	AAGCATGTTAGTTCGACATCATCATCTTTTCTTGAAGTCTGGCTCTGGGAGAGGAGTGGA	27032	calcium-transporting ATPase type 2C member 1 isoform 1d	5.27608	3.70873
ASHGA5P052902	0.0380716	0.0905522	2.9614	up	protein_coding	NM_000636	CCDS5265.1	SOD2	RefSeq	1593	chr6	-	160102754	160114353	TGAAAGATACATGGCTTGCAAAAAGTAAACCACGATCGTTATGCTGAGTATGTTAAGCTC	6648	"superoxide dismutase [Mn], mitochondrial isoform A precursor"	8.54314	6.97686
ASHGA5P050202	4.2927e-07	0.000107823	2.95954	up	protein_coding	NM_022835	CCDS33022.2	PLEKHG2	RefSeq	7642	chr19	+	39903749	39919055	TTAGCCTCTCACGTTGCCAGGTTGGAGTCTTCAGACTTGACGCCACCTCATAGTCCCCCA	64857	pleckstrin homology domain-containing family G member 2	4.68261	3.11724
ASHGA5P010857	0.000172762	0.00400895	2.95937	up	protein_coding	NM_003115	CCDS1240.1	UAP1	RefSeq	2344	chr1	+	162531295	162569633	CAATTCCCCGCTTGAAGGATGCCAATGATGTACCAATCCAATGTGAAATCTCTCCTCTTA	6675	UDP-N-acetylhexosamine pyrophosphorylase	5.46349	3.8982
ASHGA5P023143	0.045082	0.0996205	2.95845	up	protein_coding	NM_001002245	CCDS11789.1	ANAPC11	RefSeq	799	chr17	+	79849598	79858363	GGAAGGGCGGGCTCTGCTGCCATGAAGGTGAAGATTAAGTGCTGGAACGGCGTGGCCACT	51529	anaphase-promoting complex subunit 11 isoform 2	5.48472	3.91987
ASHGA5P020234	0.0472947	0.102246	2.95781	up	protein_coding	NM_001033112	CCDS4211.1	PAIP2	RefSeq	1521	chr5	+	138678133	138705409	AACCTTTGGGGTTAAAAACGACAACCAACATCAGCCATGAAAGATCCAAGTCGCAGCAGT	51247	polyadenylate-binding protein-interacting protein 2	5.20268	3.63815
ASHGA5P014543	0.0281669	0.0767822	2.9543	up	protein_coding	NM_001130710	CCDS47571.1	LSM5	RefSeq	2212	chr7	-	32524944	32534870	GGACCTGGAGAGCTTGTGGACAAATGTATAGGATCAAGAATTCACATCGTGATGAAGAGT	23658	U6 snRNA-associated Sm-like protein LSm5 isoform b	5.79612	4.2333
ASHGA5P055345	0.0353001	0.0867975	2.9531	up	protein_coding	NM_139241	CCDS8727.1	FGD4	RefSeq	8312	chr12	+	32655040	32798984	ATCATCCTGAACCTAAGAAAAAATCAGAATGCTGAACTCCTCCAGGACCAGCCATGGTGT	121512	"FYVE, RhoGEF and PH domain-containing protein 4"	9.84024	8.27801
ASHGA5P001843	0.00443753	0.0259092	2.95294	up	protein_coding	NM_001838	CCDS11369.1	CCR7	RefSeq	2207	chr17	-	38710021	38721736	ATGGACCTGGGGAAACCAATGAAAAGCGTGCTGGTGGTGGCTCTCCTTGTCATTTTCCAG	1236	C-C chemokine receptor type 7 precursor	6.01924	4.45709
ASHGA5P053766	9.15608e-06	0.00069316	2.95215	up	protein_coding	NM_020893	CCDS35077.2	C9orf174	RefSeq	5635	chr9	+	100069909	100139577	CAAAATGGCCAACCCACCATTGTGACAAAGATCCGTCCCAGACAGGTAGAGGCGCATGGG	100499483	uncharacterized protein C9orf174	4.93546	3.3737
ASHGA5P019520	0.0148863	0.052602	2.95131	up	protein_coding	NM_001166703	CCDS55422.1	FAM104B	RefSeq	1405	chrX	-	55171677	55187535	TTCTTTGGTTGAAAAGAAGAAGAAATGGCAGTAAAGAGGGCAACCATCATTCCACCCAGC	90736	protein FAM104B isoform 6	4.59092	3.02957
ASHGA5P002396	0.0137573	0.0501595	2.95115	up	protein_coding	NM_004846	CCDS2496.1	EIF4E2	RefSeq	1014	chr2	+	233415356	233433920	ACAGCATCAAAATGCCAGGCAGGCTGGGCCCCCAAAGGCTCCTTTTTCAAAACCTCTGGA	9470	eukaryotic translation initiation factor 4E type 2	7.54549	5.98421
ASHGA5P054203	0.0113869	0.0447696	2.9481	up	protein_coding	NM_001289	CCDS14767.1	CLIC2	RefSeq	2702	chrX	-	154505499	154563986	TATGCCCGTGAAGAATTTACCCACACGTGTCCTGAAGACAAAGAAATTGAAAATACTTAC	1193	chloride intracellular channel protein 2	4.75642	3.19663
ASHGA5P005423	0.00578501	0.029677	2.94084	up	protein_coding	NM_001076675	CCDS42535.1	ZNF626	RefSeq	6088	chr19	-	20802744	20844402	AAACCCTCAGTAATGTGTTCTCATTTTGCCCAAGACCTTTGGCCAGAGCAGAGCATGAAA	199777	zinc finger protein 626 isoform 1	7.07626	5.52003
ASHGA5P000955	0.00665132	0.0321724	2.93805	up	protein_coding	NM_015994	CCDS9780.1	ATP6V1D	RefSeq	1823	chr14	-	67804580	67826720	ATTGAACATGTCATCATTCCCCGGATTGAACGTACTCTTGCTTATATCATCACAGAGCTG	51382	V-type proton ATPase subunit D	5.99587	4.44101
ASHGA5P011405	0.0363983	0.0881338	2.93377	up	protein_coding	NM_145243	CCDS608.1	OMA1	RefSeq	1928	chr1	-	58946390	59012446	TATACCTCAGGCTCTCAAAATTAGAGAGATGTGTAATTGTCCACCACTGTCTAATCCAGA	115209	"metalloendopeptidase OMA1, mitochondrial precursor"	6.09246	4.5397
ASHGA5P055727	0.0336775	0.0845325	2.93162	up	protein_coding	NM_001039650	CCDS31942.1	ZMYM5	RefSeq	1535	chr13	-	20411592	20437776	GTAGTAAATTAGCAGAGGTCTGGATTTTTATACCTAAGTTGTTGTTTAGGCTAACAGTGA	9205	zinc finger MYM-type protein 5 isoform 1	5.37804	3.82634
ASHGA5P000883	0.04134	0.0948492	2.92909	up	protein_coding	NM_004765	CCDS10693.1	BCL7C	RefSeq	877	chr16	-	30899115	30905399	AACTGCTGGAAGCTGAGGCCCCCGAAGCTTACCCTGTCTTTGAGCCAGTGCCACCTGTCC	9274	B-cell CLL/lymphoma 7 protein family member C	7.40989	5.85944
ASHGA5P001061	0.0170406	0.0571533	2.92685	up	protein_coding	NM_020188	CCDS10930.1	CMC2	RefSeq	740	chr16	-	81009698	81040502	CACGAGTCGGGTTGCACTGCTGTGATCCATCCTCATCTCCTAAAGATGCATCCTGACTTA	56942	COX assembly mitochondrial protein 2 homolog	5.64313	4.09378
ASHGA5P042142	1.14993e-06	0.000188941	2.92153	up	protein_coding	NM_173515	CCDS5246.1	CNKSR3	RefSeq	3277	chr6	-	154726432	154831753	GGTTTACCATGGAACCCGTGACCAAGTGGAGCCCCAAACAAGTGGTGGACTGGACTAGAG	154043	connector enhancer of kinase suppressor of ras 3	4.3743	2.82757
ASHGA5P050880	0.00365992	0.0230426	2.92116	up	protein_coding	NM_014808	CCDS33424.1	FARP2	RefSeq	4061	chr2	+	242295663	242434256	CGCCTGCTGCTGCGCCGCCTATGCGGACATTACAGCCCCGGGCACCATGACTACGCTGAC	9855	"FERM, RhoGEF and pleckstrin domain-containing protein 2"	9.48349	7.93695
ASHGA5P038597	0.00991783	0.0408544	2.92063	up	protein_coding	NM_022149	CCDS3269.1	MAGEF1	RefSeq	1700	chr3	-	184428154	184429836	CTATTTGAGTATCTAGAGAAAAATTAAAATGCAATGAGTTAGCAGTATACCCTGGCACAC	64110	melanoma-associated antigen F1	7.47252	5.92624
ASHGA5P012575	0.0361186	0.0878139	2.92056	up	protein_coding	NM_013238	CCDS9388.1	DNAJC15	RefSeq	2792	chr13	+	43597361	43683306	TTTAGGTGTAAGCCCATCTGCTGGCAAGGCTAAGATTAGAACAGCTCATAGGAGAGTCAT	29103	dnaJ homolog subfamily C member 15	6.65726	5.11101
ASHGA5P005087	5.60802e-05	0.00206242	2.92043	up	protein_coding	NM_021913	CCDS12575.1	AXL	RefSeq	4743	chr19	+	41725107	41767671	CACCAGCTGGTGAAGGAACCTTCAACTCCTGCCTTCTCGTGGCCCTGGTGGTATGTACTG	558	tyrosine-protein kinase receptor UFO isoform 1 precursor	5.05552	3.50934
ASHGA5P053239	0.0415407	0.0950956	2.91961	up	protein_coding	NM_015415	CCDS1266.1	MPC2	RefSeq	2154	chr1	-	167885912	167906307	TGTTTGCTGTTAATTTCTTTGTGGGGGCAGCAGGAGCCTCTCAGCTTTTTCGTATTTGGA	25874	mitochondrial pyruvate carrier 2	8.34924	6.80347
ASHGA5P005822	0.0325863	0.0833644	2.91745	up	protein_coding	NM_001168347	CCDS55119.1	NSUN5	RefSeq	2371	chr7	-	72716513	72722864	TAATTGAACGGGTCGAGGTGCCAAGCCTCACAGGCCAAAGCATCAGCACCAGAACGCACA	55695	putative methyltransferase NSUN5 isoform 3	5.83935	4.29465
ASHGA5P011119	0.00920913	0.0391378	2.91634	up	protein_coding	NM_001184797	CCDS55547.1	TMLHE	RefSeq	1348	chrX	-	154722195	154842622	ATTTGATCAGATTATTCAAAGAAAAACAAAACACGGTCAACAGGCAGTGGAACTCCTCAC	55217	"trimethyllysine dioxygenase, mitochondrial isoform 2 precursor"	5.5933	4.04914
ASHGA5P009304	3.41271e-05	0.00152479	2.9157	up	protein_coding	NM_001102605	CCDS43643.1	IMPDH1	RefSeq	2595	chr7	-	128032330	128050036	GCTACGAGCCCGAGAGCTGTTTCCTCCTAGAACTATCTTCAGTGGTCTTACTGGCAGGTG	3614	inosine-5'-monophosphate dehydrogenase 1 isoform c	4.39741	2.85357
ASHGA5P033583	0.0300506	0.0793246	2.91146	up	protein_coding	ENST00000261332	CCDS11912.1	ZNF24	GENCODE	6311	chr18	-	32912177	32924426	CGTATAGTCAAAGCTCAAATCTTTTTAGACATCAGAGAAGACACAATGCAGAAAAACTTC	7572	zinc finger protein 24 [Source:HGNC Symbol;Acc:13032]	6.94682	5.40508
ASHGA5P050763	0.0330083	0.0838123	2.91107	up	protein_coding	NM_001127184	CCDS46487.1	CFLAR	RefSeq	1299	chr2	+	201980876	202006323	CCTGATCTGAAAATTCTTGGAAATTGTTCCATGTGATTAACATGGAACTGCCTCTACTTA	8837	CASP8 and FADD-like apoptosis regulator isoform 2	7.02934	5.48779
ASHGA5P010288	0.0282633	0.0769218	2.91093	up	protein_coding	NM_001935	CCDS2216.1	DPP4	RefSeq	3913	chr2	-	162848754	162931052	TTGGAGTGGATTTCCAGGCAATGTGGTATACTGATGAAGACCATGGAATAGCTAGCAGCA	1803	dipeptidyl peptidase 4	5.37203	3.83055
ASHGA5P004260	5.23e-08	2.0492e-05	2.91084	up	protein_coding	NM_153045	CCDS6808.1	C9orf91	RefSeq	4413	chr9	+	117373705	117408703	TGGGGGCAAGAGCTCCACAATGGCCAGGTCCTCACTGTTCTCCGGATTGACAATACCTGT	203197	transmembrane protein C9orf91	4.39449	2.85305
ASHGA5P008177	0.0196344	0.0620203	2.9065	up	protein_coding	NM_006860	CCDS13932.1	IFT27	RefSeq	1101	chr22	-	37154245	37172177	TTTTGAAACATCCGTGAAAGAGATGGAAAACTTCGAAGCCCCTTTCCACTGCCTTGCCAA	11020	intraflagellar transport protein 27 homolog isoform 2	8.17826	6.63898
ASHGA5P041611	9.3177e-07	0.000169142	2.89993	up	protein_coding	ENST00000327705	CCDS4460.2	BTNL9	GENCODE	3500	chr5	+	180467224	180488523	CCCGGCCTCGGCGCACCCCAGCCTGGAGGTGTCGGAGGATGGCAAGAGCGTGTCTTCCCG	153579	butyrophilin-like 9 [Source:HGNC Symbol;Acc:24176]	5.54766	4.01164
ASHGA5P000644	0.00399249	0.024327	2.8998	up	protein_coding	NM_001025159	CCDS47309.1	CD74	RefSeq	1698	chr5	-	149781199	149792499	AAAGCCCACTGACGCTCCACCGAAAGTACTGACCAAGTGCCAGGAAGAGGTCAGCCACAT	972	HLA class II histocompatibility antigen gamma chain isoform a	6.2975	4.76154
ASHGA5P005933	0.032929	0.0836946	2.89499	up	protein_coding	NM_000982	CCDS9320.1	RPL21	RefSeq	582	chr13	+	27825691	27830702	CATCTTCCAGTAATTCGCCAAAATGACGAACACAAAGGGAAAGAGGAGAGGCACCCGATA	6144	60S ribosomal protein L21	11.2026	9.66899
ASHGA5P003332	0.0445536	0.0988322	2.89391	up	protein_coding	NM_018638	CCDS8698.1	ETNK1	RefSeq	7101	chr12	+	22778075	22843608	GTCAATCAGTTTGCATTGGCTTCTCATTTCTTTTGGGGATTGTGGGCTTTGATTCAAGCC	55500	ethanolamine kinase 1 isoform A	4.77245	3.23944
ASHGA5P007368	0.0191224	0.0611977	2.89166	up	protein_coding	NM_201444	CCDS8896.1	DGKA	RefSeq	2801	chr12	+	56325811	56347807	TGCAGACGCCCTGTACAATCAAGATCACCCACAAGAACCAGATGCCCATGCTCATGGGCC	1606	diacylglycerol kinase alpha	6.8273	5.2954
ASHGA5P045711	0.0360842	0.0878139	2.89074	up	protein_coding	NM_001833	CCDS6600.1	CLTA	RefSeq	1156	chr9	+	36190852	36212059	TGACTTTAACCCCAAGTCTAGCAAGCAGGCCAAAGATGTCTCCCGCATGCGCTCAGTCCT	1211	clathrin light chain A isoform a	7.80446	6.27302
ASHGA5P054593	0.0438695	0.098132	2.88738	up	protein_coding	NM_001195305		BBIP1	RefSeq	2226	chr10	-	112658487	112679124	CCAACAACTCAGATATGGCAGAAGTGAAGTCAATGTTCCGGGAAGTTCTTCCAAAGCAAG	92482	BBSome-interacting protein 1 isoform 2	5.76381	4.23405
ASHGA5P007699	0.00561063	0.0292206	2.88737	up	protein_coding	NM_001131	CCDS4931.1	CRISP1	RefSeq	1892	chr6	-	49801978	49834218	GTGGACTTGGGGATGGAAATTAAACACCTCTTGTTTTTGGTTGCTGCTGCTTGCTTACTG	167	cysteine-rich secretory protein 1 isoform 1 precursor	5.54253	4.01278
ASHGA5P050901	0.0169117	0.0568767	2.88713	up	protein_coding	NM_021826	CCDS13048.1	FASTKD5	RefSeq	2875	chr20	-	3127164	3140532	TGCTCTCTGAAGGGCATTTAGGGGCATTTCTATGGCAAAGCTATAGGTGTATACTGTACC	60493	FAST kinase domain-containing protein 5	7.27709	5.74745
ASHGA5P034713	0.00093883	0.0105329	2.88526	up	protein_coding	NM_001195256		LOC100507003	RefSeq	1557	chr19	+	49929687	49932075	TTATGCAAACTACACCCCAAGAATCCCCAGAGATTCTGCAGCTTAATGCCACTGAAGTCT	100507003	uncharacterized protein LOC100507003 precursor	6.70791	5.17922
ASHGA5P052639	0.00682445	0.0326273	2.88508	up	protein_coding	NM_001025091	CCDS34380.1	ABCF1	RefSeq	3474	chr6	+	30539169	30559309	AAGGCAGATGATCCCTATGCTCATCTTAGCAAAAAGGAGAAGAAAAAGCTGAAAAAACAG	23	ATP-binding cassette sub-family F member 1 isoform a	5.38484	3.85623
ASHGA5P053982	0.0208873	0.0646644	2.8806	up	protein_coding	NM_001029896	CCDS35250.1	WDR45	RefSeq	1655	chrX	-	48932091	48937564	ATGATGACTTTTAAGGACCCTGGGGGCTGTGCTAGGGACCTGCAGTGGCAGAACTGCAGA	11152	WD repeat domain phosphoinositide-interacting protein 4 isoform 2	6.1426	4.61623
ASHGA5P006211	0.0119111	0.0459791	2.87831	up	protein_coding	NM_004489	CCDS11100.1	GPS2	RefSeq	1181	chr17	-	7215977	7218658	AAATGTTTGGACCCCAAGTGCTTACGACCCGGCACTACGTGGGCTCAGCAGCTGCTTTTG	2874	G protein pathway suppressor 2	5.37668	3.85146
ASHGA5P053957	7.1956e-05	0.00236457	2.87729	up	protein_coding	NM_006520	CCDS14243.1	DYNLT3	RefSeq	2230	chrX	-	37698088	37706889	CGCTCCGCCCCAGGGAGAGCCGGCGCTACCATGGAGGAGTACCATCGCCACTGCGACGAG	6990	dynein light chain Tctex-type 3	4.56761	3.0429
ASHGA5P054115	0.00041885	0.00684101	2.87605	up	protein_coding	ENST00000305536	CCDS43993.1	RBMX2	GENCODE	1528	chrX	+	129535942	129547317	CTGCGCTGCCTTTCCCGGGCGCTGATTCCTGAGTGCTGAGCGCGAACCCGAGGAGATGAA	51634	"RNA binding motif protein, X-linked 2 [Source:HGNC Symbol;Acc:24282]"	4.66996	3.14587
ASHGA5P013820	3.15111e-06	0.00036897	2.87449	up	protein_coding	NM_001145447	CCDS45395.1	ZNF200	RefSeq	3384	chr16	-	3272324	3285186	TATTATGAAAGATGTGAGCTCAAGCCTTCAGAACAGAGTGCATCCTCGTCCCTTGGTGAA	7752	zinc finger protein 200 isoform 3	4.47081	2.9475
ASHGA5P019802	4.41628e-05	0.00182186	2.87302	up	protein_coding	NM_001177999	CCDS54750.1	SLC34A2	RefSeq	4187	chr4	+	25658085	25680368	TTTTCCAAGCCACAAATGGACCATGGCTCCCTGGCCTGAATTGGGAGATGCCCAGCCCAA	10568	sodium-dependent phosphate transport protein 2B isoform b	4.75571	3.23314
ASHGA5P001668	0.00413289	0.0248681	2.87258	up	protein_coding	ENST00000241261	CCDS3219.1	TNFSF10	GENCODE	1953	chr3	-	172223297	172241297	ACAGTTCAAGAAAAGCAACAAAATATTTCTCCCCTAGTGAGAGAAAGAGGTCCTCAGAGA	8743	"tumor necrosis factor (ligand) superfamily, member 10 [Source:HGNC Symbol;Acc:11925]"	5.50866	3.98631
ASHGA5P015730	1.90695e-05	0.0011229	2.86912	up	protein_coding	NM_001144972	CCDS45481.1	SNX20	RefSeq	2197	chr16	-	50700210	50715264	TCTAAGTTTGTGGCTCCGGCTCCTGACGCCACACCCTGATATCAAGACCCTCAGATGGAG	124460	sorting nexin-20 isoform 3	5.32831	3.8077
ASHGA5P007374	0.0174365	0.0579158	2.86043	up	protein_coding	NM_172313	CCDS412.1	CSF3R	RefSeq	2999	chr1	-	36931643	36948915	CAGCGATCAGGCTGGGCCTCCCAGGCGATCTGCATACTTTAAGGACCAGATCATGCTCCA	1441	granulocyte colony-stimulating factor receptor isoform d precursor	7.49428	5.97805
ASHGA5P042339	0.0335096	0.0843548	2.86012	up	protein_coding	NM_001185094	CCDS53403.1	NIT1	RefSeq	1536	chr1	+	161087907	161090984	TGACCTCTATGGCAATCTGGGTCACCCACTGTCTTAAGACTTGACTTCTGTGAGTTTAGA	4817	nitrilase homolog 1 isoform 4	5.12469	3.60862
ASHGA5P051928	0.0350633	0.0865003	2.85865	up	protein_coding	NM_001100400	CCDS54759.1	PDS5A	RefSeq	2745	chr4	-	39899590	39979576	CTTGCAAACAAGCAGATATTTGTGTGGTTAGTAAATCATACTTCACACTTTTTCTCTAGC	23244	sister chromatid cohesion protein PDS5 homolog A isoform 3	5.27852	3.76319
ASHGA5P011486	4.5971e-06	0.000469323	2.85654	up	protein_coding	NM_015160	CCDS35180.1	PMPCA	RefSeq	2097	chr9	+	139305115	139318213	GATTCATGAAGCGGCTTACAGGGAGAACACAGTTGGCCTCCACCGTTTCTGCCCCACAGA	23203	mitochondrial-processing peptidase subunit alpha precursor	4.9377	3.42343
ASHGA5P047544	0.0162099	0.05545	2.85386	up	protein_coding	NM_001010848	CCDS31233.1	NRG3	RefSeq	3692	chr10	+	83635069	84746935	TCTGTTCATCGGCTTCATCGGCCTGGGGCTCAGCCTCATGCTTCTCAAATGGATCGTGGT	10718	"pro-neuregulin-3, membrane-bound isoform isoform 1"	4.86511	3.3522
ASHGA5P001711	0.044047	0.0982712	2.85143	up	protein_coding	NM_020317	CCDS260.1	C1orf63	RefSeq	1482	chr1	-	25568739	25573985	AAAGCCTGAACTGTCGGAAAAGGTAACAGAAGATGGAACTCGAAATCCCAATGAAAAACC	57035	UPF0471 protein C1orf63	9.20824	7.69656
ASHGA5P030809	1.979e-08	1.26e-05	2.84975	up	protein_coding	NM_000693	CCDS10389.1	ALDH1A3	RefSeq	3510	chr15	+	101420008	101456830	AACTGCTACAACGCCCTCTATGCACAGGCTCCATTTGGTGGCTTTAAAATGTCAGGAAAT	220	aldehyde dehydrogenase family 1 member A3	4.79134	3.28051
ASHGA5P017958	0.0133759	0.0493742	2.84521	up	protein_coding	NM_001134693		OST4	RefSeq	509	chr2	-	27293341	27294567	GACTGGTCAGGATGATCACGGACGTGCAGCTCGCCATCTTCGCCAACATGCTGGGCGTGT	100128731	dolichyl-diphosphooligosaccharide--protein glycosyltransferase subunit 4	7.70027	6.19174
ASHGA5P054832	0.0206462	0.064201	2.84013	up	protein_coding	NM_001143984	CCDS44593.1	PTPMT1	RefSeq	2568	chr11	+	47586981	47595013	ACCTCTTTGCCTCGGCAGCTGGTACAGGACGAGAACGTGCGCGGGGTGATCACCATGAAC	114971	protein-tyrosine phosphatase mitochondrial 1 isoform 2	4.77752	3.27156
ASHGA5P055575	0.00166694	0.0146811	2.83393	up	protein_coding	ENST00000343702	CCDS9054.1	NTN4	GENCODE	3615	chr12	-	96051582	96184536	CCTCCCGGCCATGGGGAGCTGCGCGCGGCTGCTGCTGCTCTGGGGCTGCACGGTGGTGGC	59277	netrin 4 [Source:HGNC Symbol;Acc:13658]	8.35187	6.84907
ASHGA5P001389	0.0173672	0.0577792	2.83282	up	protein_coding	NM_139012	CCDS4816.1	MAPK14	RefSeq	4353	chr6	+	35995453	36079013	AATGTATTTATTGGTGCCAATCCCCTGGCTGTCGACTTGCTGGAGAAGATGCTTGTATTG	1432	mitogen-activated protein kinase 14 isoform 2	7.28736	5.78512
ASHGA5P006109	0.033414	0.0842071	2.83272	up	protein_coding	NM_031369	CCDS3591.1	HNRNPD	RefSeq	2200	chr4	-	83274466	83295149	AACAACTACTATGGATATGGTGATTATAGCAACCAGCAGAGTGGTTATGGGAAGGTATCC	3184	heterogeneous nuclear ribonucleoprotein D0 isoform b	6.00477	4.50258
ASHGA5P014137	0.0347501	0.0859848	2.83123	up	protein_coding	NM_001003696	CCDS13574.1	ATP5J	RefSeq	841	chr21	-	27096790	27107965	GGCTCACGAGAATCAGCATGATTCTTCAGAGGCTCTTCAGGTTCTCCTCTGTCATTCGGT	522	"ATP synthase-coupling factor 6, mitochondrial isoform a precursor"	5.41185	3.91042
ASHGA5P053274	0.0168592	0.0568475	2.83067	up	protein_coding	NM_001166345	CCDS55155.1	MDFIC	RefSeq	5312	chr7	+	114562208	114659970	ATTGTCCTGGGACAAGCGTCATGTGGCATCTGCACCTCAGAAGCCTGCTGCTGTTGCTGT	29969	myoD family inhibitor domain-containing protein isoform p32	4.99959	3.49845
ASHGA5P033142	1.22522e-06	0.000198116	2.83067	up	protein_coding	NM_016438	CCDS11488.1	HIGD1B	RefSeq	654	chr17	+	42925278	42927848	TACCGGCTGAGGTCTCGTGGTTCCACCAAGATGTCCATACACCTGATTCACACCCGAGTG	51751	HIG1 domain family member 1B	4.27477	2.77363
ASHGA5P037259	0.016842	0.0568235	2.82988	up	protein_coding	NM_181608	CCDS13595.1	KRTAP19-2	RefSeq	159	chr21	-	31859508	31859667	GGAGATGGCTGCTGCTGCCCATCATGCTACAGAAGATATAGATTCACTGGCTTCTACTAA	337969	keratin-associated protein 19-2	7.5899	6.08916
ASHGA5P016784	0.0141329	0.0510677	2.82729	up	protein_coding	NM_001005851	CCDS46077.1	ZNF780B	RefSeq	8664	chr19	-	40534166	40562115	ACCTAGCTGGGGGAGAAGCCCGAGGAAGATTGACCAATTTTGTAATTCTAGAAACATGGT	163131	zinc finger protein 780B	5.3211	3.82168
ASHGA5P027099	0.0445261	0.0988322	2.82051	up	protein_coding	NM_005274	CCDS696.1	GNG5	RefSeq	823	chr1	-	84964005	84972262	GCCGCTATGAAGAAAGTGGTTCAACAGCTCCGGCTGGAGGCCGGACTCAACCGCGTAAAA	2787	guanine nucleotide-binding protein G(I)/G(S)/G(O) subunit gamma-5 precursor	7.03265	5.5367
ASHGA5P050100	0.000262534	0.00513327	2.81864	up	protein_coding	NM_152357	CCDS42503.1	ZNF440	RefSeq	4181	chr19	+	11925106	11946016	GATCTGCCCAGAACCTTCGAATTCATGAAAGGACACAAACACACATAATGCACTCTGTAG	126070	zinc finger protein 440	5.96857	4.47357
ASHGA5P012023	0.0317029	0.0819273	2.81401	up	protein_coding	ENST00000401084	CCDS41277.1	CAPZB	GENCODE	1710	chr1	-	19665266	19812066	ATGGGCTGAGGTCTGTGCAGACTTTTGCAGACAAATCAAAACAAGAAGCTCTGAAGAATG	832	"capping protein (actin filament) muscle Z-line, beta [Source:HGNC Symbol;Acc:1491]"	6.72877	5.23614
ASHGA5P012839	2.55714e-05	0.00130902	2.81353	up	protein_coding	ENST00000381077	CCDS48075.1	HDHD1	GENCODE	2140	chrX	-	6966960	7066231	AAGTTAAAGGAAGTGTTCCCCACGGCTGCGCTCATGCCAGGGGCGGAGAAACTCATCATC	8226	haloacid dehalogenase-like hydrolase domain containing 1 [Source:HGNC Symbol;Acc:16818]	5.2248	3.73242
ASHGA5P008357	2.713e-08	1.4546e-05	2.813	up	protein_coding	NM_001123378	CCDS46714.1	ADSL	RefSeq	1388	chr22	+	40742503	40762575	TAGCCGCCAGGTGCAGAGATTCTTAGAAGAGGAGGTGTATCCCCTGTTAAAACCATATGA	158	adenylosuccinate lyase isoform b	9.14015	7.64804
ASHGA5P000858	0.0152627	0.05347	2.81277	up	protein_coding	NM_006263	CCDS9612.1	PSME1	RefSeq	1012	chr14	+	24605377	24608176	CAATGCTTATGCTGTGTTATATGACATCATCCTGAAGAACTTCGAGAAGCTCAAGAAGCC	5720	proteasome activator complex subunit 1 isoform 1	8.72619	7.2342
ASHGA5P002634	0.0329693	0.0837553	2.80739	up	protein_coding	ENST00000261560	CCDS32978.1	ZNF430	GENCODE	3919	chr19	+	21203425	21242852	AGACATGCGATGGTAGATCAACCCCCAGTTACATATTCTCATTTTGCCCAAGACCTTTGG	80264	zinc finger protein 430 [Source:HGNC Symbol;Acc:20808]	7.67217	6.18294
ASHGA5P012544	0.00171187	0.0149143	2.80588	up	protein_coding	NM_001135673	CCDS46260.1	ATL2	RefSeq	2967	chr2	-	38522028	38604432	ATGGGAACAGGTATTGAAGCCCCTGGGTGATAATTTGATGGAGGAAAACATAAGGCAGTC	64225	atlastin-2 isoform 2	5.27868	3.79023
ASHGA5P009269	0.000420082	0.006847	2.80559	up	protein_coding	NM_152685	CCDS4213.1	SLC23A1	RefSeq	2378	chr5	-	138702884	138719039	TATTTGGCACCCACGGATACGGGAGGTGGGTTTGCATGTCCAGGGTGCAATCATGGTGTC	9963	solute carrier family 23 member 1 isoform b	6.19003	4.70172
ASHGA5P049166	0.00190284	0.015853	2.80507	up	protein_coding	NM_013292	CCDS10677.1	MYLPF	RefSeq	683	chr16	+	30386122	30389310	GAGTAGGGGCACCCGCGGGCCTCCGCTGCCCGACGCTTCTGTTCGGCCCGACCTCCACCC	29895	"myosin regulatory light chain 2, skeletal muscle isoform"	7.84583	6.35779
ASHGA5P005063	0.0266552	0.0744752	2.8036	up	protein_coding	NM_003414	CCDS32440.1	ZNF267	RefSeq	3268	chr16	+	31885078	31928629	ATCCAGCCAGATGTGTTTTCGCATTATAACAAGGACCTGTTGACAGAGCACTGCACAGAA	10308	zinc finger protein 267 isoform 1	6.08153	4.59425
ASHGA5P053023	0.00695341	0.032885	2.80291	up	protein_coding	ENST00000323037	CCDS5426.1	ZNRF2	GENCODE	3460	chr7	+	30323922	30407308	TGGTTTGAAGTAAATAGATCTTGCCCTGAGCACCCTTCAGATTAAGCGTCAGCTTCCTGT	223082	zinc and ring finger 2 [Source:HGNC Symbol;Acc:22316]	9.20122	7.71429
ASHGA5P050254	0.0157405	0.0543739	2.79711	up	protein_coding	NM_020160	CCDS33064.1	MEIS3	RefSeq	2166	chr19	-	47906374	47922785	GTGGCTGCAGCACCCGTACCCCTCGGAGGAGCAGAAGAAACAGCTGGCGCAGGACACGGG	56917	homeobox protein Meis3 isoform 1	9.92314	8.4392
ASHGA5P043816	5.74232e-06	0.00053667	2.79516	up	protein_coding	NM_002593	CCDS5700.1	PCOLCE	RefSeq	1651	chr7	+	100199881	100205798	TTGTGGTTCTCCACCGGCCCAACCAGGACCAGATCCTCACCAACCTAAGCAAGAGGAAGT	5118	procollagen C-endopeptidase enhancer 1 precursor	6.03815	4.55521
ASHGA5P000673	0.0370367	0.0890051	2.79396	up	protein_coding	ENST00000037243	CCDS10921.1	GABARAPL2	GENCODE	1002	chr16	+	75600248	75611779	CACAGTCCAGCCTAACTATGGGACAGCTTTACGAGAAGGAAAAAGATGAAGATGGATTCT	11345	GABA(A) receptor-associated protein-like 2 [Source:HGNC Symbol;Acc:13291]	5.56467	4.08235
ASHGA5P052061	0.0287183	0.0774792	2.79333	up	protein_coding	NM_002966	CCDS1008.1	S100A10	RefSeq	1069	chr1	-	151955385	151966714	CTTTTCCCTAATTGCGGGCCTCACCATTGCATGCAATGACTATTTTGTAGTACACATGAA	6281	protein S100-A10	8.2418	6.75982
ASHGA5P028257	0.0361643	0.0878411	2.79314	up	protein_coding	NM_007062	CCDS9114.1	PWP1	RefSeq	1853	chr12	+	108079589	108106257	TTTATGCCTTTGGAGGTCAAAAAGAAGGGCTTCGGGTCTGGGATATAAGCACAGTCTCTT	11137	periodic tryptophan protein 1 homolog	5.78994	4.30805
ASHGA5P007300	0.0217486	0.0661944	2.79254	up	protein_coding	NM_015920	CCDS42048.1	RPS27L	RefSeq	1084	chr15	-	63445538	63449741	CAACATGCCTTTGGCTAGAGATTTACTACATCCGTCCTTGGAAGAGGAAAAGAAAAAACA	51065	40S ribosomal protein S27-like	8.05574	6.57416
ASHGA5P012370	0.0123186	0.0469313	2.79161	up	protein_coding	NM_001082537	CCDS41835.1	TCTN1	RefSeq	2025	chr12	+	111051831	111086935	CAACAGGAAGGATTCCTGCCAGCTCCCAGGGGCTTTGGTTATAGAAGTGAAGTGGACTAA	79600	tectonic-1 isoform 2 precursor	5.08234	3.60124
ASHGA5P055331	0.0268343	0.0747407	2.79145	up	protein_coding	NM_016551	CCDS8710.1	TM7SF3	RefSeq	4346	chr12	-	27124505	27167339	GAGCGCCGAGTGACAAACATTCTGGACCCTAGCTACCACATTCCTCCATTGAGAGAGAGG	51768	transmembrane 7 superfamily member 3 precursor	7.70141	6.22039
ASHGA5P006656	0.0366166	0.0884336	2.78937	up	protein_coding	NM_001099672	CCDS55255.1	C8orf59	RefSeq	963	chr8	-	86126287	86132643	TGCTGTTTCAACAATGGCCAAGAACAAATTAAGAGGGCCGAAGTCCAGGAATGTATTTCA	401466	uncharacterized protein C8orf59	6.50346	5.02353
ASHGA5P004756	0.0269924	0.0750264	2.78439	up	protein_coding	NM_014886	CCDS4025.1	NSA2	RefSeq	1104	chr5	+	74063102	74072734	CGTCACCATGCCACAGAATGAATATATTGAATTACACCGTAAACGCTATGGATACCGTTT	10412	ribosome biogenesis protein NSA2 homolog	5.15933	3.68197
ASHGA5P005255	0.0412932	0.0947632	2.77988	up	protein_coding	NM_004513	CCDS10317.1	IL16	RefSeq	6077	chr15	+	81589253	81605104	ATTTTCAAAGGAGCAGCCTCAGAACAAAGTGAGACAGTCCAGCCTGGAGATGAAATCTTA	3603	pro-interleukin-16 isoform 1	5.73904	4.26401
ASHGA5P054282	9.51338e-05	0.00276894	2.77782	up	protein_coding	ENST00000366758	CCDS1561.1	JMJD4	GENCODE	2595	chr1	-	227918889	227923112	GTGCAGGAGGAGGTCAGCGAGTGGAGGGACTCCATGCCCGACTGGCACCACCACTGCCAG	65094	jumonji domain containing 4 [Source:HGNC Symbol;Acc:25724]	6.10528	4.63133
ASHGA5P010091	0.0232227	0.0690109	2.77758	up	protein_coding	NM_001042440	CCDS54882.1	CAST	RefSeq	4550	chr5	+	95997906	96110385	TAAAAACAGAACCTGAGAAGAAGTCACAGTCAACCAAGCCAAAAAGCCTACCCAAGCAGG	831	calpastatin isoform f	6.62058	5.14675
ASHGA5P001919	2.05031e-05	0.00116036	2.77632	up	protein_coding	NM_014351	CCDS14051.1	SULT4A1	RefSeq	2465	chr22	-	44220386	44258378	ATCGTCACCTACCCCAAGTCCGGCACCAGCTTGCTGCAGGAGGTGGTCTACTTGGTGAGC	25830	sulfotransferase 4A1	5.23029	3.75712
ASHGA5P005242	1.37941e-06	0.000207176	2.77468	up	protein_coding	NM_005214	CCDS2362.1	CTLA4	RefSeq	2033	chr2	+	204732510	204738683	ATTTATGTAATTGATCCAGAACCGTGCCCAGATTCTGACTTCCTCCTCTGGATCCTTGCA	1493	cytotoxic T-lymphocyte protein 4 isoform CTLA4-TM precursor	5.07913	3.60681
ASHGA5P003410	0.0310192	0.0807469	2.77375	up	protein_coding	NM_004049	CCDS10312.1	BCL2A1	RefSeq	899	chr15	-	80253231	80263643	CGGAGGCTGGGAAAATGGCTTTGTAAAGAAGTTTGAACCTAAATCTGGCTGGATGACTTT	597	bcl-2-related protein A1 isoform 1	8.45581	6.98398
ASHGA5P055369	0.0393892	0.0921584	2.77295	up	protein_coding	NM_138371	CCDS8752.1	PCED1B	RefSeq	2091	chr12	+	47610051	47630443	GCCTCAATAGACGGACCTAGGCCTTATTTCCTCTTTATGAACATGGATTGGACAGATCTG	91523	protein FAM113B	6.46407	4.99265
ASHGA5P008881	0.0251055	0.0722313	2.77193	up	protein_coding	ENST00000348222	CCDS1932.1	DGUOK	GENCODE	880	chr2	+	74153952	74186088	ACAGTGACAGGCTCCACTTTGAGGCTCTGATGAACATTCCAGTGCTGGTGTTGGATGTCA	1716	deoxyguanosine kinase [Source:HGNC Symbol;Acc:2858]	7.24871	5.77782
ASHGA5P022047	0.0140839	0.0510074	2.77162	up	protein_coding	NM_139201	CCDS9139.1	GIT2	RefSeq	2357	chr12	-	110385866	110434194	TTGAGTGACGAGCTGAGAATTATGCAGAAAAAGTTGCTTGGAAAAGATGCTAATTAATGA	9815	ARF GTPase-activating protein GIT2 isoform 4	5.76566	4.29493
ASHGA5P010302	0.00010763	0.0029704	2.77073	up	protein_coding	ENST00000360617	CCDS33083.1	KLK3	GENCODE	1906	chr19	+	51358170	51364020	CACCTGCTCGTGGGTCATTCTGATCACCGAACTGACCATGCCAGCCCTGCCGATGGTCCT	354	kallikrein-related peptidase 3 [Source:HGNC Symbol;Acc:6364]	5.24568	3.77541
ASHGA5P008987	0.0476566	0.102747	2.76729	up	protein_coding	NM_178237	CCDS3503.1	EXOC1	RefSeq	3381	chr4	+	56719815	56771244	AAGAAGTTTGGTCTTCATGGAAGTTCGGGGAAATTAACTGGATCTACTTCTAGTCTAAAT	55763	exocyst complex component 1 isoform 2	4.8711	3.40263
ASHGA5P000736	0.0498309	0.10558	2.76679	up	protein_coding	NM_005113	CCDS9905.1	GOLGA5	RefSeq	2891	chr14	+	93260649	93306304	TCAATTGATCAGTTTAGTATTCGCCTGGGAATTTTTCTCCGAAGATACCCCATAGCGCGA	9950	Golgin subfamily A member 5	5.56299	4.09478
ASHGA5P047942	0.0439908	0.0982105	2.7649	up	protein_coding	NM_199342	CCDS474.1	CCDC23	RefSeq	816	chr1	-	43272722	43283059	AACAGAGTCATGACAGAACTGGAGCAGCAGCAGTTTGATGAGTTCTGTAAACAGATGCAG	374969	coiled-coil domain-containing protein 23	5.21371	3.74648
ASHGA5P050688	0.036358	0.088086	2.76397	up	protein_coding	NM_018103	CCDS726.1	LRRC8D	RefSeq	3782	chr1	+	90287479	90401989	TGGGATTTAAACTAAGATAATATATGCACAGTGATGTGCAGGAACAACTTCCTAGATTGC	55144	leucine-rich repeat-containing protein 8D	4.9747	3.50796
ASHGA5P010944	0.030317	0.07953	2.76171	up	protein_coding	NM_001145264	CCDS44243.1	LAMTOR2	RefSeq	609	chr1	+	156024516	156028301	TAATGAAGACAATCTCAAATTCATCCTCATGGACTGCATGGCCCAGGCTTTGGTGCAGTA	28956	ragulator complex protein LAMTOR2 isoform 2	6.43866	4.9731
ASHGA5P012587	6.3084e-07	0.000126007	2.75348	up	protein_coding	NM_014145	CCDS13086.1	TMEM230	RefSeq	1699	chr20	-	5080483	5093733	GGAGAATAACCTGTGTCAGCGTGTTATGATGCCGTCCCGTACCAACCTGGCTACTGGAAT	29058	transmembrane protein 230 isoform 2	5.40155	3.9403
ASHGA5P006997	7.5148e-05	0.00241055	2.75278	up	protein_coding	NM_147148	CCDS806.1	GSTM4	RefSeq	1372	chr1	+	110198697	110208123	TGGACGCCTTTCCAAATCTGAAGGACTTCATCTCCCGCTTTGAGGTTTCCTGTGGCATAA	2948	glutathione S-transferase Mu 4 isoform 2	5.48	4.01911
ASHGA5P006712	0.04457	0.0988322	2.74845	up	protein_coding	NM_001032363	CCDS30620.1	MINOS1	RefSeq	3726	chr1	+	19923470	19956315	GTCGTGAAGATAGGTACTGGTTTTGGATTAGGAATTGTTTTCTCACTTACCTTCTTTAAA	440574	mitochondrial inner membrane organizing system protein 1 isoform a	7.2583	5.79969
ASHGA5P023158	0.00077745	0.00961151	2.74764	up	protein_coding	NM_006344	CCDS45597.1	CLEC10A	RefSeq	1716	chr17	-	6977855	6983600	TCTCAACAACAATGGTGAGGAAGCCTCCACTGAAGGGACCTGCTGCCCTGTCAACTGGGT	10462	C-type lectin domain family 10 member A isoform 2	5.29536	3.83717
ASHGA5P034074	0.0161578	0.0553231	2.74742	up	protein_coding	NM_004146	CCDS12314.1	NDUFB7	RefSeq	573	chr19	-	14676889	14682889	TCAAGTGCAAGCGTGACAGCTTCCCCAACTTCCTGGCCTGCAAGCAGGAGCGGCACGACT	4713	NADH dehydrogenase [ubiquinone] 1 beta subcomplex subunit 7	6.27062	4.81254
ASHGA5P011420	0.0107851	0.0430853	2.74724	up	protein_coding	NM_014060	CCDS14601.1	MCTS1	RefSeq	9805	chrX	+	119737743	119755016	CTTTACCCTGCTGCAGTAGATACCATTGTTGCTATCATGGCAGAAGGAAAACAGCATGCT	28985	malignant T-cell-amplified sequence 1 isoform 1	6.73159	5.27361
ASHGA5P011167	0.0384062	0.0907862	2.74573	up	protein_coding	NM_001191002	CCDS53572.1	GSTO1	RefSeq	918	chr10	+	106014467	106027222	GTTTTCTAAGGTTCTGACTAATAAGAAGACGACCTTCTTTGGTGGCAATTCTATCTCTAT	9446	glutathione S-transferase omega-1 isoform 2	7.0235	5.56631
ASHGA5P003776	0.0252529	0.0724224	2.74518	up	protein_coding	NM_012173	CCDS5954.1	FBXO25	RefSeq	2452	chr8	+	356807	419875	TATTCTCGCCTGGCAACAACAGCTACAGGATCTTCAGATGACTAAGCAAGTGAACAATGG	26260	F-box only protein 25 isoform 3	5.78208	4.32518
ASHGA5P004727	0.0145175	0.0517639	2.74266	up	protein_coding	ENST00000296522	CCDS3821.1	HPGD	GENCODE	3027	chr4	-	175411327	175444049	GAATTTTGGACCCACCATTGATTGCCAATGGATTGATAACACTCATTGAAGATGATGCTT	3248	hydroxyprostaglandin dehydrogenase 15-(NAD) [Source:HGNC Symbol;Acc:5154]	6.79297	5.3374
ASHGA5P008783	0.024341	0.0710014	2.74037	up	protein_coding	NM_172215	CCDS53837.1	CAMKK2	RefSeq	2852	chr12	-	121681390	121736111	GGAAATCAAGATCCTGGTGAAGACCATGATACGTAAACGCTCCTTTGGGAACCCATTCGA	10645	calcium/calmodulin-dependent protein kinase kinase 2 isoform 6	4.87844	3.42407
ASHGA5P010164	0.0430032	0.0970644	2.74034	up	protein_coding	NM_001033574	CCDS32714.1	AMZ2	RefSeq	1806	chr17	+	66244144	66253305	CAGTCCATTGGGGACATCCTGAAGTTCTTGAAAAAGAAGAAACCTGAAGATGCCTTCTGT	51321	archaemetzincin-2 isoform 2	5.08355	3.6292
ASHGA5P011601	0.0351271	0.0866021	2.73911	up	protein_coding	NM_001190880	CCDS53309.1	HYI	RefSeq	1269	chr1	-	43916673	43919660	TCAGCCTCGAGGAGACACAGTAGAGGGCTTGAGTTGGCTACGTTCATACTGGGATAGGCG	81888	putative hydroxypyruvate isomerase isoform 3	5.64158	4.18787
ASHGA5P013226	0.0243157	0.0710014	2.73904	up	protein_coding	NM_001130447	CCDS45247.1	HAUS2	RefSeq	3860	chr15	+	42841010	42862190	GGTCAATCAGAAAAACCTGGAAATTGAACTCCTGAAACTAGAAAAAGATACAGCAGATGT	55142	HAUS augmin-like complex subunit 2 isoform 2	4.99899	3.54532
ASHGA5P035514	0.0300884	0.0793246	2.73861	up	protein_coding	NM_032472	CCDS2332.1	PPIL3	RefSeq	1191	chr2	-	201735678	201753849	AAGGACATAACTATTCATGCCAACCCATTTGCTCAGTAGCTATGATAGACCTGGACAAAT	53938	peptidyl-prolyl cis-trans isomerase-like 3 isoform PPIL3a	6.7732	5.31975
ASHGA5P005304	0.00692407	0.0328225	2.73765	up	protein_coding	NM_001011668	CCDS34895.1	CHCHD7	RefSeq	1723	chr8	+	57124314	57131176	ATGTTACCTAGTAAGAAGACTGTTAGAATGCCCTCGGTAACACAGAGGCTGAGAGATCCT	79145	coiled-coil-helix-coiled-coil-helix domain-containing protein 7 isoform b	6.1201	4.66716
ASHGA5P008105	0.00857441	0.0373919	2.73444	up	protein_coding	NM_003368	CCDS621.1	USP1	RefSeq	3949	chr1	+	62902382	62917475	ACACACTGAGGGAACTCAACCCTATGTATGAAGGATATCTACAGCATGATGCACAGGAAG	7398	ubiquitin carboxyl-terminal hydrolase 1	6.62599	5.17475
ASHGA5P018424	0.00219432	0.0171029	2.73386	up	protein_coding	NM_001142625	CCDS54101.1	RAB34	RefSeq	1118	chr17	-	27041298	27045286	GGAGATGAAGACTGTTCAGAGACTGCCCAGCCCTAGGGCACTGTGCCACCCTCATTCCTC	83871	ras-related protein Rab-34 isoform 3	6.56718	5.11624
ASHGA5P046478	0.0176432	0.0582974	2.73226	up	protein_coding	NM_001128127	CCDS48090.1	GK	RefSeq	4572	chrX	+	30671475	30749577	TGTGAGCTTTTTACATAATGAAAGAACCCAGCAATTCTGTCTCTTAATGCAATGACACTA	2710	glycerol kinase isoform c	5.56955	4.11945
ASHGA5P054252	0.0378027	0.0902076	2.73224	up	protein_coding	NM_001042553	CCDS41465.1	TATDN3	RefSeq	2585	chr1	+	212965169	212990167	TCTATTTCAGCAGAATATATTGCCCAGGTGAAAGGGATCTCAGTGGAAGAAGTTATAGAA	128387	putative deoxyribonuclease TATDN3 isoform 2	5.56112	4.11103
ASHGA5P015763	0.0489387	0.10434	2.73193	up	protein_coding	NM_001195307		BBIP1	RefSeq	2136	chr10	-	112658487	112679124	GAACTTTCAGGGCCACTGTTTGTGGAAGATATAATGACAATGGTGCTGTGTAAACCCAAA	92482	BBSome-interacting protein 1 isoform 3	5.68708	4.23717
ASHGA5P048745	0.0319075	0.0822046	2.72907	up	protein_coding	NM_000942	CCDS10191.1	PPIB	RefSeq	1045	chr15	-	64448013	64455354	ACAGTCAAGACAGCCTGGCTAGATGGCAAGCATGTGGTGTTTGGCAAAGTTCTAGAGGGC	5479	peptidyl-prolyl cis-trans isomerase B precursor	7.71687	6.26846
ASHGA5P046014	9.38197e-06	0.000702751	2.72882	up	protein_coding	NM_006059	CCDS6938.1	LAMC3	RefSeq	6107	chr9	+	133884503	133968446	ACCATACCGAGGGCCCATCCTGTGAACGCTGTTTGCCAGGTTTCTATGGCAACCCTTTCG	10319	laminin subunit gamma-3 precursor	4.33757	2.8893
ASHGA5P003628	0.0483074	0.103514	2.72812	up	protein_coding	NM_016058	CCDS1927.1	TPRKB	RefSeq	752	chr2	-	73956956	73964517	TCCTACAGTGATTGTTGATCCATTTCAGATACTTGTGGCAGCAAACAAAGCAGTTCACCT	51002	TP53RK-binding protein	6.30827	4.86037
ASHGA5P034252	0.00108499	0.01143	2.7247	up	protein_coding	ENST00000302165	CCDS12678.1	IRF2BP1	GENCODE	2511	chr19	-	46386865	46389376	AAGGGACCTCCTGAAAACTCGCTCTTTATAAACGAGGCAAAAGCATTTAATTCCCACCCC	26145	interferon regulatory factor 2 binding protein 1 [Source:HGNC Symbol;Acc:21728]	6.23287	4.78677
ASHGA5P040824	0.0237849	0.0700887	2.72283	up	protein_coding	NM_001040874	CCDS30849.1	HIST2H2AA4	RefSeq	534	chr1	+	149822627	149823161	TACTGCTCCCTAAGAAGACGGAGAGTCACCACAAGGCAAAGGGCAAGTGAGGCTGACGTC	723790	histone H2A type 2-A	7.63347	6.18836
ASHGA5P010899	9.26931e-05	0.00271544	2.72219	up	protein_coding	NM_000045	CCDS5145.1	ARG1	RefSeq	1475	chr6	+	131894343	131905472	AAAGAACAAGAGTGTGATGTGAAGGATTATGGGGACCTGCCCTTTGCTGACATCCCTAAT	383	arginase-1 isoform 2	4.63241	3.18764
ASHGA5P002167	0.0211076	0.0650598	2.71865	up	protein_coding	NM_002306	CCDS41956.1	LGALS3	RefSeq	1017	chr14	+	55595934	55612148	ACCATTCAAAATACAAGTACTGGTTGAACCTGACCACTTCAAGGTTGCAGTGAATGATGC	3958	galectin-3 isoform 1	8.11645	6.67355
ASHGA5P042797	0.0415986	0.0952066	2.71685	up	protein_coding	NM_004905	CCDS1307.1	PRDX6	RefSeq	1715	chr1	+	173446485	173457946	TTACAATTGTGAAGAGCCCACAGAAAAGTTACCTTTTCCCATCATCGATGATAGGAATCG	9588	peroxiredoxin-6	4.95277	3.51084
ASHGA5P003650	4.6973e-06	0.000469323	2.71172	up	protein_coding	NM_020311	CCDS2516.1	CXCR7	RefSeq	2114	chr2	+	237478379	237490994	CAGCCCGGAGGTCATTTGATTGCCCGCCTCAGAACGATGGATCTGCATCTCTTCGACTAC	57007	C-X-C chemokine receptor type 7	4.95387	3.51466
ASHGA5P013554	9.60841e-05	0.00278863	2.71077	up	protein_coding	NM_033625	CCDS3680.1	RPL34	RefSeq	1003	chr4	+	109541748	109551639	TGGTGTAGGGGCACTCAGAATGGTCCAGCGTTTGACATACCGACGTAGGCTTTCCTACAA	6164	60S ribosomal protein L34	9.22055	7.78185
ASHGA5P053365	0.00126159	0.0125747	2.71047	up	protein_coding	NM_207336	CCDS5899.1	ZNF467	RefSeq	2295	chr7	-	149461452	149470295	TTCTTCTGAGCCTAGTTCTCACGAGGACCCTTTCTTGCCCACAGTTTCGAGAGGCCCGTG	168544	zinc finger protein 467	5.71708	4.27854
ASHGA5P047132	0.0419606	0.0957089	2.70919	up	protein_coding	NM_007041	CCDS31299.1	ATE1	RefSeq	2224	chr10	-	123502624	123687546	TTCTTTGTATGTCAAGTATCAAGTGGCCATACACCAGGATCCACCCGATGAATGTGGGAA	11101	arginyl-tRNA--protein transferase 1 isoform 2	5.34623	3.90837
ASHGA5P050329	0.0190653	0.0610665	2.70894	up	protein_coding	NM_001081639	CCDS42616.1	LILRB1	RefSeq	2859	chr19	+	55141907	55149004	AACTTTCCTTCTGACCAAGGAGGGGGCAGCTGATGACCCATGGCGTCTAAGATCAACGTA	10859	leukocyte immunoglobulin-like receptor subfamily B member 1 isoform 4 precursor	5.14631	3.70858
ASHGA5P050699	0.038202	0.0906507	2.70646	up	protein_coding	NM_014168	CCDS33320.1	METTL5	RefSeq	956	chr2	-	170668267	170681353	TTCTCCGCAGATCCTGTGCCTTCAAACCCTACGAGTCCATACTTTAAAACAAAATGAAGA	29081	methyltransferase-like protein 5	6.26403	4.82762
ASHGA5P001235	0.0393481	0.0921045	2.7051	up	protein_coding	ENST00000224073	CCDS7011.1	EDF1	GENCODE	640	chr9	-	139756570	139760738	TCGAGCGGGCCATTGGCCTCAAGCTCCGGGGAAAGGACATTGGAAAGCCCATCGAGAAGG	8721	endothelial differentiation-related factor 1 [Source:HGNC Symbol;Acc:3164]	6.7354	5.29971
ASHGA5P049049	0.0015994	0.0143932	2.70474	up	protein_coding	NM_016936	CCDS10525.1	UBN1	RefSeq	6485	chr16	+	4902076	4932363	TTTTCAATGTTAACAGAAGCCATGCAGTGACACCCGCTAAGACTTGTTGGTAGCCATGTC	29855	ubinuclein-1	4.62521	3.18972
ASHGA5P010085	0.029654	0.0789146	2.70437	up	protein_coding	NM_004244	CCDS8578.1	CD163	RefSeq	4190	chr12	-	7623411	7656414	AATTCCTCAGAAAATTCCCATGAGTCAGCTGATTTCAGTGCTGCTGAACTAATTTCTGTG	9332	scavenger receptor cysteine-rich type 1 protein M130 isoform a precursor	5.47467	4.03938
ASHGA5P041719	0.000568281	0.00828195	2.70423	up	protein_coding	ENST00000357549	CCDS4631.1	HIST1H4K	GENCODE	354	chr6	-	27798951	27799305	TACGGTTTCGGTGGTTGAGCGTCCCTTTCTATCAACAAAAGGCCCTTTTTAGGGCCCCCA	8362	"histone cluster 1, H4k [Source:HGNC Symbol;Acc:4784]"	7.1753	5.74009
ASHGA5P033787	0.0456819	0.10038	2.704	up	protein_coding	NM_013326	CCDS32803.1	C18orf8	RefSeq	2173	chr18	+	21083461	21111744	CCTTAAGGTTTATCCGGGGCATTGGTGGCCATGACAACATTTCTGCACGAAAATTTTTAG	29919	uncharacterized protein C18orf8	6.2372	4.80211
ASHGA5P003951	0.0457531	0.100471	2.70254	up	protein_coding	NM_006023	CCDS7090.1	CDC123	RefSeq	1566	chr10	+	12237960	12292589	GCTCACAAGCTAATAGACTTCCTTAAGCTGAAGAGAAATCAGCAGGAGGACGACTGATGA	8872	cell division cycle protein 123 homolog	6.56287	5.12856
ASHGA5P009531	3.46179e-06	0.000391836	2.70187	up	protein_coding	NM_014591	CCDS7521.1	KCNIP2	RefSeq	2608	chr10	-	103585730	103603677	GTCAGTGAAATTGGCCGGGTCTTCCGCTTTCTCGGTGACAGTTCGCTCCCTTCAGCATTA	30819	Kv channel-interacting protein 2 isoform 1	4.78475	3.35079
ASHGA5P051325	8.67105e-05	0.00265095	2.7015	up	protein_coding	NM_004286	CCDS13977.2	GTPBP1	RefSeq	5074	chr22	+	39101806	39129592	AATGTACCTGTCTTTGTGGTAGTCACCAAGATTGACATGTGTCCTGCCAACATCCTGCAA	9567	GTP-binding protein 1	3.99769	2.56393
ASHGA5P021073	0.0414726	0.0950465	2.7015	up	protein_coding	NM_148170	CCDS31654.1	CTSC	RefSeq	6143	chr11	-	88053980	88070941	AACAAACTGGTTATTAAATAGAGCATCTGTTGAGGGACTCTTTTAAAACCACAGCCATGA	1075	dipeptidyl peptidase 1 isoform b precursor	6.00807	4.57431
ASHGA5P053117	1.18e-09	3.484e-06	2.70139	up	protein_coding	NM_001135211	CCDS47604.1	FKBP6	RefSeq	1544	chr7	+	72742154	72772641	AGGGCCGTTGGCGGCGGTTGGAACGAAACGATGAGTGCCTCCTCGTGGCCCCAGAATGGA	8468	peptidyl-prolyl cis-trans isomerase FKBP6 isoform b	4.21457	2.78086
ASHGA5P021786	0.0303224	0.07953	2.69872	up	protein_coding	NM_001134484	CCDS47968.1	TOMM5	RefSeq	932	chr9	-	37588411	37592636	GCGGTTTGAGCTCCATTTATCTTAAAGAAATTGGACAGCATATGAAGACAGGACATCACA	401505	mitochondrial import receptor subunit TOM5 homolog isoform 3	6.70703	5.27476
ASHGA5P041834	4.69922e-06	0.000469323	2.6986	up	protein_coding	NM_002630	CCDS4859.1	PGC	RefSeq	1392	chr6	-	41704448	41715139	AACTGTAACAGCATTCAGAATCTGCCCAGCTTGACCTTCATCATCAATGGTGTGGAGTTC	5225	gastricsin isoform 1 preproprotein	4.25043	2.81822
ASHGA5P055121	0.0459416	0.100625	2.69399	up	protein_coding	NM_153818	CCDS41.1	PEX10	RefSeq	2094	chr1	-	2336240	2344010	TGCCTTACAGCTCCGTGTCCGCAGCCTGCCCGGAGAGGACCTGAGGGCCCGTGTTAGCTA	5192	peroxisome biogenesis factor 10 isoform 1	5.13248	3.70274
ASHGA5P003180	0.00784435	0.0353586	2.69374	up	protein_coding	NM_001226	CCDS3684.1	CASP6	RefSeq	1661	chr4	-	110609784	110624629	CAGGGGGCACCCGGCAGGTGGGGAAGAAAACATGACAGAAACAGATGCCTTCTATAAAAG	839	caspase-6 isoform alpha preproprotein	6.08341	4.65379
ASHGA5P052538	1.10746e-05	0.000737367	2.69267	up	protein_coding	NM_001040451	CCDS34312.1	RUFY1	RefSeq	2674	chr5	+	178986692	179037027	TGCCCCACAGCTTCTAAGTGCCAGATGATGGAGGAGCGTGCCAACCTGATGCACATGATG	80230	RUN and FYVE domain-containing protein 1 isoform b	4.74063	3.31159
ASHGA5P002123	0.0211555	0.0651288	2.68997	up	protein_coding	NM_015185	CCDS35315.1	ARHGEF9	RefSeq	5450	chrX	-	62854847	62975031	TTCAACATGGCCTCGCTGTGATATGTATGACGTTGCTGATCACTGGAGATTCCATCGTTA	23229	rho guanine nucleotide exchange factor 9 isoform 1	5.47296	4.04537
ASHGA5P001131	0.0328658	0.0835757	2.68739	up	protein_coding	ENST00000221486	CCDS12282.1	RNASEH2A	GENCODE	1142	chr19	+	12917427	12924462	AAACTGCAGGACTTGGATACTGATTATGGCTCAGGCTACCCCAATGATCCCAAGACAAAA	10535	"ribonuclease H2, subunit A [Source:HGNC Symbol;Acc:18518]"	6.49986	5.07365
ASHGA5P001242	0.00532183	0.0285311	2.68709	up	protein_coding	ENST00000224862	CCDS31273.1	FBXL15	GENCODE	2362	chr10	+	104179570	104182893	ACGGTGTCAGGACATTGGCCGAGTACTGCCCCGTGCTGCGTTCGCTGCGGGTGCGGCACT	79176	F-box and leucine-rich repeat protein 15 [Source:HGNC Symbol;Acc:28155]	4.98057	3.55453
ASHGA5P013552	0.0333194	0.0841015	2.68571	up	protein_coding	NM_017918	CCDS3683.2	CCDC109B	RefSeq	1298	chr4	+	110481354	110608872	CACTCGACAGGATTATACTTACTCAGCTGTTAAGAGTAGGCAATTTCTTCAGTTCTTCCA	55013	coiled-coil domain-containing protein 109B	7.58596	6.16066
ASHGA5P052254	0.0359791	0.087684	2.68531	up	protein_coding	NM_153706	CCDS3972.1	SETD9	RefSeq	1722	chr5	+	56205086	56213165	CTACTACACAATTGTCAGCTAACTCTGTGAATCAGAAATTATTAGGTTTTCTACTCAGCT	133383	SET domain-containing protein 9 isoform 1	5.47835	4.05326
ASHGA5P050898	0.0121245	0.0465031	2.68449	up	protein_coding	ENST00000380843	CCDS13032.1	IDH3B	GENCODE	1545	chr20	-	2639040	2644865	TTCATCAAGTCTGTCATCGGTCACCTGCAGACTAAAGGGAGCTAGAGCCCTTTATTTCTT	3420	isocitrate dehydrogenase 3 (NAD+) beta [Source:HGNC Symbol;Acc:5385]	6.39058	4.96593
ASHGA5P001594	0.021372	0.0655695	2.6842	up	protein_coding	NM_022334	CCDS1663.1	ITGB1BP1	RefSeq	1780	chr2	-	9545814	9563643	AGATCAATATGAACAAGCACAAGCCATTTGCAAGGTTTTATCCACCGCTTTTGACTCTGT	9270	integrin beta-1-binding protein 1 isoform 2	8.28029	6.8558
ASHGA5P009052	0.0314156	0.0814327	2.68119	up	protein_coding	NM_145182	CCDS10709.1	PYCARD	RefSeq	725	chr16	-	31212806	31214097	ACGCACCAGGGCCTGCACTTTATAGACCAGCACCGGGCTGCGCTTATCGCGAGGGTCACA	29108	apoptosis-associated speck-like protein containing a CARD isoform b	5.93631	4.51343
ASHGA5P031928	3.2182e-07	9.1066e-05	2.68109	up	protein_coding	NM_014940	CCDS10925.1	MON1B	RefSeq	3328	chr16	+	77224835	77233543	TTCAACCCTGATGGTTTTTTCTACGCCTACGTGGCCCGCCTGGATGCTATGCCTGTCTGC	22879	vacuolar fusion protein MON1 homolog B	4.40042	2.9776
ASHGA5P008849	0.0281743	0.0767822	2.68046	up	protein_coding	NM_007328	CCDS8626.1	KLRC1	RefSeq	1389	chr12	-	10598637	10605979	GTTATTCCCTCACGTCATTGTGGCCATTGTCCTGAGGAGTGGATTACATATTCCAACAGT	3821	NKG2-A/NKG2-B type II integral membrane protein isoform NKG2-B	5.47729	4.05481
ASHGA5P014005	2.79373e-06	0.000344051	2.67911	up	protein_coding	NM_181527	CCDS42854.1	NAA20	RefSeq	1189	chr20	+	19998438	20014273	CTGCGTCCCCTGCAGCAGATGCTGTCTCAGTCATGTAACTTGGATCCACTTACAGAAACT	51126	N-alpha-acetyltransferase 20 isoform b	6.18753	4.76577
ASHGA5P019797	0.0402474	0.0934154	2.67898	up	protein_coding	NM_021928	CCDS54823.1	SPCS3	RefSeq	4596	chr4	+	177241089	177253396	GGATCATGCTAAAAAATGTAGAAGATTTCACTGGACCTAGAGAAAGAAGTGATCTGGGAT	60559	signal peptidase complex subunit 3	5.34852	3.92684
ASHGA5P050745	0.0451204	0.0996434	2.67689	up	protein_coding	NM_139266	CCDS42793.1	STAT1	RefSeq	2798	chr2	-	191840262	191878976	TGTCTGAAGTGTAAGTGAACACAGAAGAGTGACATGTTTACAAACCTCAAGCCAGCCTTG	6772	signal transducer and activator of transcription 1-alpha/beta isoform beta	6.65906	5.2385
ASHGA5P003001	0.0424927	0.0963868	2.6746	up	protein_coding	NM_016951	CCDS10807.1	CKLF	RefSeq	888	chr16	+	66586465	66600190	GCCTTTGCTTGATATTATCAACTCACTGGTAACAACAGTATTCATGCTCATCGTATCTGT	51192	chemokine-like factor isoform a	6.93535	5.51603
ASHGA5P017336	0.0200379	0.0629047	2.67378	up	protein_coding	ENST00000457378	CCDS55078.1	SUN1	GENCODE	1309	chr7	+	856251	883509	CCCAGGACAGTATGGTTTGAAGTGGTGAACATGGATTTTTCTCGGCTTCACATGTACAGT	23353	Sad1 and UNC84 domain containing 1 [Source:HGNC Symbol;Acc:18587]	4.84266	3.42378
ASHGA5P013793	0.0158964	0.0546529	2.67304	up	protein_coding	NM_203416	CCDS53742.1	CD163	RefSeq	4107	chr12	-	7623411	7656414	AATTCCTCAGGAGGCCATTCTGAGCCACACTGAAAAGGAAAATGGGAATTTATAACCCAG	9332	scavenger receptor cysteine-rich type 1 protein M130 isoform b precursor	6.73894	5.32047
ASHGA5P002993	0.0398495	0.0927859	2.67297	up	protein_coding	NM_012110	CCDS3493.1	CHIC2	RefSeq	1178	chr4	-	54875957	54930815	CCAGTTATTTGCCTCAGTAAAAGAACACGAAGATCGATTGAGAAGTTATTAGAATGGGAA	26511	cysteine-rich hydrophobic domain 2 protein	4.70936	3.29092
ASHGA5P049184	1.56861e-06	0.000221569	2.67107	up	protein_coding	NM_001136509	CCDS45471.1	ZNF843	RefSeq	2013	chr16	-	31446884	31454348	TCCAACCTGGCCCGACACTGAAGAACCAGCGTGCTGCAGCCCTGGGTGGAATTGTTGCAG	283933	zinc finger protein 843	4.46759	3.05017
ASHGA5P005506	0.00363565	0.0229525	2.67027	up	protein_coding	NM_001100389	CCDS43279.1	TMEM192	RefSeq	4511	chr4	-	165997229	166034024	GATGGAGGACGGTTCCTTGGATATCACCCAGAGTATTGAAGACGACCCACTTCTGGATGC	201931	transmembrane protein 192	6.54867	5.13169
ASHGA5P017249	4.67251e-06	0.000469323	2.66914	up	protein_coding	ENST00000439329	CCDS9402.1	CPB2	GENCODE	1544	chr13	-	46627330	46679161	TCAAATATTCCGTTACATCAAACCCACCTGTAGAGAAGCTTTTGCCGCTGTCTCTAAAAT	1361	carboxypeptidase B2 (plasma) [Source:HGNC Symbol;Acc:2300]	3.8662	2.44982
ASHGA5P012145	3.08882e-05	0.00141738	2.66751	up	protein_coding	NM_033118	CCDS13191.1	MYLK2	RefSeq	2793	chr20	+	30407177	30422500	TTTGCTCCAGCTAGAAAGACTTGAGTTAGACAAGCAGCAGCACACGCCTCCCTACCTCAT	85366	"myosin light chain kinase 2, skeletal/cardiac muscle"	4.99024	3.57475
ASHGA5P051582	0.0336633	0.0845325	2.66145	up	protein_coding	NM_173359	CCDS33786.1	EIF4E3	RefSeq	6185	chr3	-	71728439	71803924	GCGACTGTTTTAGAAAAGATCTATGAACTTCTGCCCCACATAACTTTTAAAGCAGTATTT	317649	eukaryotic translation initiation factor 4E type 3 isoform b	9.28774	7.87552
ASHGA5P048693	0.00421445	0.0251809	2.66089	up	protein_coding	NM_002041	CCDS45258.1	GABPB1	RefSeq	1658	chr15	-	50578076	50647605	AGAAATAGAAGTAAGGAGTCTTTTACCCGGTGTGCTTTGCCGCAGTCATCCAAAATAAAT	2553	GA-binding protein subunit beta-1 isoform gamma 1	5.71013	4.29822
ASHGA5P012568	0.0255107	0.0726935	2.65634	up	protein_coding	NM_182649	CCDS13087.1	PCNA	RefSeq	1319	chr20	-	5095598	5100647	GTACCCCTTGTTGTAGAGTATAAAATTGCGGATATGGGACACTTAAAATACTACTTGGCT	5111	proliferating cell nuclear antigen	8.26746	6.85801
ASHGA5P033974	1.67e-08	1.1613e-05	2.64898	up	protein_coding	NM_001171091	CCDS54201.1	UBXN6	RefSeq	1831	chr19	-	4445002	4455295	ACCCACGAGTTTTTTGAGGCCATTGGGTTCCAGAAGGTGTTGCTTCCCGCCCAGGATCAG	80700	UBX domain-containing protein 6 isoform 2	4.32572	2.92029
ASHGA5P017178	0.000182506	0.00409514	2.64847	up	protein_coding	NM_015933	CCDS46823.1	TMA7	RefSeq	491	chr3	+	48481685	48485537	GGGCCCTTGGCCACAGGTGGAATTAAGAAATCTGGCAAAAAGTAAGCTGTTCCTTGTGCC	51372	coiled-coil domain-containing protein 72	12.6896	11.2845
ASHGA5P033744	0.00221097	0.0171539	2.64822	up	protein_coding	NM_032243	CCDS11846.1	TXNDC2	RefSeq	1972	chr18	+	9885722	9888156	GATGAACTTTGCGGCGCCCTTAAGGAAAAACTTGAAGCAGTCATTGCAGAATTAAAGTAA	84203	thioredoxin domain-containing protein 2 isoform 1	4.41583	3.01081
ASHGA5P047838	0.000676445	0.00898378	2.64498	up	protein_coding	NM_001130519	CCDS44521.1	ZNF195	RefSeq	3213	chr11	-	3379156	3400452	TGTGGCAAAGCCTTCACCCAGTTCTCACACCTGACTGTACATGAAAGCATTCATACTTGA	7748	zinc finger protein 195 isoform 2	8.31661	6.91335
ASHGA5P049146	2.18915e-05	0.00119961	2.64276	up	protein_coding	ENST00000315732	CCDS408.1	LSM10	GENCODE	850	chr1	-	36859030	36863493	AATTTCCCCCAAAAAACTGTAAGTGAGGCCCTCAGCAAGCCCTGGCCCCAACTCGGAGTC	84967	"LSM10, U7 small nuclear RNA associated [Source:HGNC Symbol;Acc:17562]"	9.06114	7.6591
ASHGA5P001923	0.00240054	0.0179799	2.6412	up	protein_coding	NM_003378	CCDS5712.1	VGF	RefSeq	2586	chr7	-	100805789	100808852	ACACCAGCTGTCTCCGGCAGCCTCTTGGTCATGAAAGCCCTCAGATTGTCGGCTTCCGCC	7425	neurosecretory protein VGF precursor	6.26089	4.85969
ASHGA5P010274	0.048372	0.103609	2.6395	up	protein_coding	NM_021077	CCDS10332.1	NMB	RefSeq	1046	chr15	-	85198359	85201802	ACCCCAAATCCAGTACAGGAGGCTGCTGGTACAAATACTGCAGAAATGACACCAATAATG	4828	neuromedin-B isoform 1 preproprotein	5.65822	4.25796
ASHGA5P000825	0.0385336	0.0909505	2.63818	up	protein_coding	NM_002294	CCDS14599.1	LAMP2	RefSeq	6603	chrX	-	119560002	119603204	ACACAAGGAAAGTATTCTACAGCTCAAGACTGCAGTGCAGATGACGACAACTTCCTTGTG	3920	lysosome-associated membrane glycoprotein 2 isoform A precursor	4.99699	3.59745
ASHGA5P038876	0.0283472	0.0770679	2.63057	up	protein_coding	NM_174907	CCDS2917.1	PPP4R2	RefSeq	1495	chr3	+	73046118	73115011	ACAGAAGTCACCGATGAACCAATGGAACAAGACTAACTATTTAGAAACATTTAGATGCAG	151987	serine/threonine-protein phosphatase 4 regulatory subunit 2	5.46988	4.07451
ASHGA5P003911	0.0096907	0.0402279	2.63051	up	protein_coding	NM_015054	CCDS31882.1	UHRF1BP1L	RefSeq	5195	chr12	-	100430862	100536642	ACACTTAAATCACAGTCATCTTTAAGTGGAAAGCCTAAGGAACGTTGCCCACCCAACCTG	23074	UHRF1-binding protein 1-like isoform a	4.90704	3.51169
ASHGA5P037713	6.95137e-05	0.00233708	2.63051	up	protein_coding	NM_016272	CCDS14015.1	TOB2	RefSeq	4575	chr22	-	41829491	41843027	TTGTGGAAGGCCTCAGCTACAACCTGAACACCATGCAGTATCCCAGCCAGCAGTTCCAGC	10766	protein Tob2	5.04114	3.64579
ASHGA5P002416	6.23137e-06	0.00056207	2.62688	up	protein_coding	NM_014038	CCDS5362.1	BZW2	RefSeq	1867	chr7	+	16685758	16746148	TCGTCGCTACCTCCTCGGACAGAAATTTTATGAATAAGCATCAGAAGCCAGTGCTAACAG	28969	basic leucine zipper and W2 domain-containing protein 2	5.70531	4.31196
ASHGA5P040463	0.0168941	0.0568767	2.62509	up	protein_coding	NM_173829	CCDS34171.1	SREK1IP1	RefSeq	6856	chr5	-	64013977	64064496	AAGCAAGCGCCTTTTCGAAAGCCAGAGGCTCGAGTTACCCCTCTTACCACCGTCATGGCA	285672	protein SREK1IP1	7.83166	6.43929
ASHGA5P004572	0.0444415	0.0988268	2.62397	up	protein_coding	NM_018460	CCDS2184.1	ARHGAP15	RefSeq	1774	chr2	+	143886898	144525921	CCATGAAAGTCCTCTTTGGACATCTAACTAAGATAGTGGCCAAAGCCTCCAAGAACCTCA	55843	rho GTPase-activating protein 15	5.8526	4.46085
ASHGA5P007554	0.0127725	0.0481011	2.62303	up	protein_coding	NM_138787	CCDS7904.1	C11orf74	RefSeq	837	chr11	+	36616092	36680817	ATGGATGAAGAGATTAAACCCCAAATGAGTGAGGATTTGCTGCTGCTTCCAGGAGAAGTG	119710	uncharacterized protein C11orf74	5.60824	4.217
ASHGA5P010656	1.42361e-06	0.000207176	2.6213	up	protein_coding	NM_016102	CCDS1571.1	TRIM17	RefSeq	2085	chr1	-	228595635	228604583	CTTCCCCGCGAGTCCCTCAAGCGGGAACCTGCCTCGTGTCTCCCAGGAGCCATGGAGGCT	51127	E3 ubiquitin-protein ligase TRIM17 isoform 1	5.15179	3.76151
ASHGA5P037162	4.002e-08	1.7934e-05	2.62035	up	protein_coding	ENST00000217159	CCDS13501.1	SLCO4A1	GENCODE	2776	chr20	+	61273796	61303647	AGCCCCAAGTTCTTGGAGTCCCAGTTCAGCCTGAGTGCCTCAGAAGCTGCCACCTTGTTT	28231	"solute carrier organic anion transporter family, member 4A1 [Source:HGNC Symbol;Acc:10953]"	4.72153	3.33177
ASHGA5P031226	0.0294109	0.0784523	2.61978	up	protein_coding	NM_001018160	CCDS42172.1	NAE1	RefSeq	1716	chr16	-	66836780	66864879	AAAGCAAAGAAAGATGCTGCCGCTGTGGGTAATCATGTTGCCAAATTGCTGCAGTCCATT	8883	NEDD8-activating enzyme E1 regulatory subunit isoform c	5.36884	3.9794
ASHGA5P001840	0.0052452	0.028342	2.61925	up	protein_coding	ENST00000246551	CCDS32998.1	HCST	GENCODE	507	chr19	+	36393381	36395173	AGATCATCACTCCCTGCCTTTTACCCTGGCACTTCAGGCTCTTGTTCCGGATGTGGGTCC	10870	hematopoietic cell signal transducer [Source:HGNC Symbol;Acc:16977]	10.4651	9.07599
ASHGA5P008928	0.0123434	0.0469539	2.61852	up	protein_coding	NM_001190214	CCDS53937.1	PPIP5K1	RefSeq	5640	chr15	-	43825659	43882451	AGTGGCCTAGGGTTTGAAGGGTGTTCCATGGTGCCTACCATCTACCCTCTGGAAACACTG	9677	inositol hexakisphosphate and diphosphoinositol-pentakisphosphate kinase 1 isoform 6	6.31158	4.92283
ASHGA5P003117	0.000276594	0.00523443	2.61678	up	protein_coding	NM_020386	CCDS3303.1	HRASLS	RefSeq	1076	chr3	+	192958916	192988644	TATCAACATAGCACCTGTAGATGGCATTCCTGCGTCCTTTACAAGCGCCAAGTCTGTATT	57110	phospholipid-metabolizing enzyme A-C1	4.29668	2.90889
ASHGA5P008242	0.0257889	0.0731381	2.6155	up	protein_coding	NM_001135553	CCDS44134.1	MKNK1	RefSeq	2704	chr1	-	47023078	47069966	CTTTGAAGATGACACAAGGTTTTACTTGGTCTTTGAGAAATTGCAAGGAGGTTCCATCTT	8569	MAP kinase-interacting serine/threonine-protein kinase 1 isoform 3	5.43353	4.04645
ASHGA5P034290	0.0193931	0.0616019	2.61469	up	protein_coding	NM_015953	CCDS12772.1	NOSIP	RefSeq	1116	chr19	-	50058967	50083803	AAGGACATGGTGGACCCTGTGACTGGAGACAAACTCACAGACCGCGACATCATCGTGCTG	51070	nitric oxide synthase-interacting protein	8.1774	6.79076
ASHGA5P008858	0.00664893	0.0321724	2.61404	up	protein_coding	NM_181652	CCDS8071.1	PRDX5	RefSeq	646	chr11	+	64085559	64089295	GCAGCCATGGCCCCAATCAAGGTTCGGCTCCTGGCTGATCCCACTGGGGCCTTTGGGAAG	25824	"peroxiredoxin-5, mitochondrial isoform c"	4.98418	3.5979
ASHGA5P011040	0.000165715	0.0038987	2.61319	up	protein_coding	NM_024041	CCDS987.1	SCNM1	RefSeq	2036	chr1	+	151138497	151142773	TGTGCTCAAAAAAAGAAGAGTCGGGGACCTCCTAGCCAGTTACATTCCAGAGGATGAGGC	79005	sodium channel modifier 1 isoform 1	5.0184	3.63259
ASHGA5P004850	0.0202771	0.0634098	2.61259	up	protein_coding	ENST00000373758	CCDS44411.1	REEP3	GENCODE	5205	chr10	+	65281122	65384883	AAATCTGTGAAAACCACCAAAGGCCGCAAAGAGGTGCGGTACGGGTCACTAAAATACAAA	221035	receptor accessory protein 3 [Source:HGNC Symbol;Acc:23711]	6.25228	4.8668
ASHGA5P011824	1.32096e-06	0.000203922	2.61215	up	protein_coding	ENST00000373693	CCDS14416.1	CXCR3	GENCODE	1624	chrX	-	70835765	70838367	GGTCCTTGAGGTGAGTGACCACCAAGTGCTAAATGACGCCGAGGTTGCCGCCCTCCTGGA	2833	chemokine (C-X-C motif) receptor 3 [Source:HGNC Symbol;Acc:4540]	4.25338	2.86814
ASHGA5P036575	0.00286403	0.0199219	2.61199	up	protein_coding	ENST00000343217	CCDS33418.1	DUSP28	GENCODE	1555	chr2	+	241499470	241503431	AGGCTTGAAGCTTGAAGGCCTGCTGCCTGGAGGAAGGATGTCCCTGCACTGATACAGAAG	285193	dual specificity phosphatase 28 [Source:HGNC Symbol;Acc:33237]	5.59616	4.21101
ASHGA5P045845	2.48325e-05	0.00128411	2.61074	up	protein_coding	NM_032558	CCDS6710.2	HIATL1	RefSeq	3312	chr9	+	97136832	97223202	GCATCACGTTTCCGGCAATCAGTGCCCTCGTCTCTCGGAATGCAGAGTCAGATCAGCAAG	84641	hippocampus abundant transcript-like protein 1	4.81976	3.4353
ASHGA5P003964	0.0128079	0.048172	2.60956	up	protein_coding	NM_002643	CCDS1827.1	PIGF	RefSeq	1057	chr2	-	46808412	46844251	TTGGGAAAGACCATGGCAGGTATGGCCCATCTCCTGTACGCTTGGAGCGACCTTTGGCTA	5281	phosphatidylinositol-glycan biosynthesis class F protein isoform 1	5.35038	3.96658
ASHGA5P042374	0.0465927	0.101506	2.60794	up	protein_coding	NM_001040438	CCDS34416.1	C6orf48	RefSeq	748	chr6	+	31802692	31807541	TGGAGAGAAGCTTTGTATGGCTGTCATGCTTAGACAGTGATTCCTGCAACTTGACCTTCA	50854	protein G8	7.48219	6.09928
ASHGA5P009218	0.0413566	0.094866	2.60577	up	protein_coding	NM_033295	CCDS8332.1	CASP1	RefSeq	443	chr11	-	104896236	104905884	ATGGGTGAAGATAATGTTTCTTGGAGACATCCCACAATGGGCTCTGTTTTTATTGGAAGA	834	caspase-1 isoform epsilon	7.11661	5.7349
ASHGA5P054154	0.00661323	0.0320347	2.60294	up	protein_coding	NM_006123	CCDS14686.1	IDS	RefSeq	1437	chrX	-	148568661	148586884	GGACAAATACCTGATTTTGAATAAAGCAGCATTCAGTTGAAATAACCCTTTCTGTGGTAA	3423	iduronate 2-sulfatase isoform b precursor	7.89859	6.51844
ASHGA5P008405	5.0027e-07	0.00011463	2.60254	up	protein_coding	NM_001035511	CCDS41431.1	SDHC	RefSeq	2694	chr1	+	161284165	161334535	TTGAGTGCAGATGTGGGACCTAGGAAAAGGCCTGAAGATTCCCCAGCTATACCAGTCTGG	6391	"succinate dehydrogenase cytochrome b560 subunit, mitochondrial isoform 2 precursor"	4.2186	2.83868
ASHGA5P005209	0.0283308	0.0770437	2.60111	up	protein_coding	NM_152766	CCDS11102.1	C17orf61	RefSeq	490	chr17	-	7306292	7307450	GCCACTCTGGGCTGGGTTATTGCTAGCTTCCGGAACGACCTTATTCTGCACCAGCTTTTA	254863	UPF0451 protein C17orf61 precursor	6.13757	4.75844
ASHGA5P004160	0.0330754	0.0838965	2.60111	up	protein_coding	NM_001628	CCDS5831.1	AKR1B1	RefSeq	1416	chr7	-	134127106	134143888	CCTTGTTGAGCTGTACCTCCCACAAGGATTACCCCTTCCATGAAGAGTTTTGAAGCTGTG	231	aldose reductase	7.32732	5.94819
ASHGA5P030879	0.0116395	0.0452219	2.60044	up	protein_coding	NM_001042371	CCDS42104.1	PGP	RefSeq	3136	chr16	-	2261602	2264822	ATCATCGGGAAGCCCAGCCGCTTCATTTTCGACTGCGTGTCCCAGGAATACGGCATCAAC	283871	phosphoglycolate phosphatase	6.50274	5.12398
ASHGA5P008718	0.0465327	0.10144	2.59912	up	protein_coding	NM_012383	CCDS6651.1	OSTF1	RefSeq	1313	chr9	+	77703397	77762114	AACCAGTCAAACCAGGGCAAGTTAAAGTCTTCAGAGCCCTGTATACGTTTGAACCCAGAA	26578	osteoclast-stimulating factor 1	4.82815	3.45013
ASHGA5P009223	7.7212e-07	0.000148407	2.59565	up	protein_coding	ENST00000353284	CCDS12139.1	PTPRS	GENCODE	6006	chr19	-	5205518	5340814	CTGCAGTCCATCTCGCCCAAGAACTTCAAGGTGAAAATGATCATGAAGACATCAGTTCTG	5802	"protein tyrosine phosphatase, receptor type, S [Source:HGNC Symbol;Acc:9681]"	4.4751	3.099
ASHGA5P053159	0.0310876	0.0808706	2.59441	up	protein_coding	NM_002069	CCDS5595.1	GNAI1	RefSeq	3318	chr7	+	79764139	79848725	ACCGCAACCTCCGTGAGGACGGCGAGAAGGCGGCGCGCGAGGTCAAGCTGCTGCTGCTCG	2770	guanine nucleotide-binding protein G(i) subunit alpha-1 isoform 1	5.39072	4.01532
ASHGA5P014257	0.0468791	0.101906	2.59162	up	protein_coding	NM_014660	CCDS47542.1	PHF14	RefSeq	8370	chr7	+	11013498	11147376	TTGGAGATGCCTCAGATTCTGAAGGGAGTGGTAATGGAAGTGAAGATGCTTCAAAGGACA	9678	PHD finger protein 14	5.561	4.18714
ASHGA5P045451	1.05732e-06	0.000179515	2.59121	up	protein_coding	NM_001004450	CCDS35126.1	OR1B1	RefSeq	957	chr9	-	125390857	125391814	ATTACACCTTTGGCCAACCCATTTGTGTATAGCCTCCACAATAAGGATGTCAAGGGTGCA	347169	olfactory receptor 1B1	6.3985	5.02488
ASHGA5P025234	0.000512968	0.00771876	2.59042	up	protein_coding	NM_001256408		LOC158434	RefSeq	2662	chr9	-	98868942	98878693	AAGGAAGATGAGAAATAATTCCCTGACTGGTGTCCCTTCCGTTTCGGGATGAATTGTCCT	158434	uncharacterized protein LOC158434	4.98599	3.6128
ASHGA5P052894	0.0452243	0.0997901	2.58383	up	protein_coding	NM_016020	CCDS5248.1	TFB1M	RefSeq	2818	chr6	-	155577263	155635617	CTCACACTTTAAGAGCCTCTGTGATGTATACAGAAAAATGTGTGATGAAGACCCACAACT	51106	"dimethyladenosine transferase 1, mitochondrial"	5.81769	4.44818
ASHGA5P002965	0.000786999	0.00966176	2.58273	up	protein_coding	NM_001012410	CCDS33716.1	SGOL1	RefSeq	2355	chr3	-	20202084	20227698	GAAAAAGAGACGGAGGGTTCTAAGCCAACAAAAACTCCTACCACTACACCACCTGAAACT	151648	shugoshin-like 1 isoform A2	5.50576	4.13687
ASHGA5P004763	0.0409918	0.0943692	2.58246	up	protein_coding	NM_052971	CCDS4163.1	LEAP2	RefSeq	707	chr5	+	132209357	132210582	AAGGCTATGCAGAAAAAGACGCTGTTCCTTAAGTGTGGCCCAGGAATGATGTACATACCA	116842	liver-expressed antimicrobial peptide 2 precursor	5.05128	3.68254
ASHGA5P002857	0.00399433	0.024327	2.58213	up	protein_coding	ENST00000262946	CCDS12073.1	UQCR11	GENCODE	1335	chr19	-	1597153	1605483	AAGAAGGATAATTAATTACACAAACCCTTCACAGACTGCTCTGGTGCCTGGTGGTGCTAG	10975	"ubiquinol-cytochrome c reductase, complex III subunit XI [Source:HGNC Symbol;Acc:30862]"	8.51509	7.14653
ASHGA5P035435	0.0292162	0.0782537	2.58194	up	protein_coding	NM_001011708	CCDS42779.1	OLA1	RefSeq	4255	chr2	-	174937174	175113365	CTTCTTCAAATTTAACACACCTCAACAACCGAAGAAGAAATAAAATTTAGTTATTGCTCA	29789	obg-like ATPase 1 isoform 2	6.35387	4.98541
ASHGA5P055344	0.0282939	0.0769844	2.58179	up	protein_coding	NM_018169	CCDS8725.2	C12orf35	RefSeq	6246	chr12	+	32112352	32146043	TGCTAGCAACCTGTCTTTCCCTGTGGAAAAAGCAACCTTCAGATACTGCAAAAGAAAAGG	55196	uncharacterized protein C12orf35	4.92969	3.56132
ASHGA5P002427	0.0183754	0.0597917	2.58176	up	protein_coding	NM_004136	CCDS10302.1	IREB2	RefSeq	6367	chr15	+	78730517	78793798	TCCAGACAGAACCTTTAGGTACTGACCCCACCGGCAAGAACATTTACCTGCATGATATTT	3658	iron-responsive element-binding protein 2	6.93798	5.56963
ASHGA5P052524	0.00207728	0.0166331	2.58001	up	protein_coding	NM_013237	CCDS4415.1	PRELID1	RefSeq	1287	chr5	+	176730834	176733950	TTTATCATTAAAAATCAACTTCCAGCCCTGTCTGCTGTCTACGTGGTGGGTTGTGGGGAT	27166	"PRELI domain-containing protein 1, mitochondrial precursor"	10.0037	8.63636
ASHGA5P007923	0.00127582	0.0126305	2.5797	up	protein_coding	NM_054114	CCDS5261.1	TAGAP	RefSeq	3363	chr6	-	159456026	159466184	TTTGCCAGCTCATTGAAGTTAAGAAGAGAAAGAAGGTGCTGTCCTGGCCCTTTCTCATGA	117289	T-cell activation Rho GTPase-activating protein isoform b	4.63393	3.26673
ASHGA5P007193	0.0134177	0.0493988	2.57931	up	protein_coding	NM_003666	CCDS1278.1	BLZF1	RefSeq	2344	chr1	+	169337193	169365780	GATTGCCCTTTAACAGTCAATATGTTGGAGGCATGCTAAGAATAAACAACTAAATAACTG	8548	Golgin-45	5.31066	3.94367
ASHGA5P020708	0.0310242	0.0807469	2.57678	up	protein_coding	NM_001011669	CCDS55232.1	CHCHD7	RefSeq	1747	chr8	+	57124314	57131176	AGAAACTCATGCACCAAACTCGAACTGGTAAGAAGACTGTTAGAATGCCCTCGGTAACAC	79145	coiled-coil-helix-coiled-coil-helix domain-containing protein 7 isoform c	7.42588	6.06031
ASHGA5P012132	0.0167281	0.0565695	2.57609	up	protein_coding	NM_001320	CCDS4712.1	CSNK2B	RefSeq	1128	chr6	+	31633656	31637843	TTTGTGCCCAGGCTCTACGGTTTCAAGATCCATCCGATGGCCTACCAGCTGCAGCTCCAA	1460	casein kinase II subunit beta	7.405	6.03982
ASHGA5P034936	4.74827e-05	0.00188948	2.57352	up	protein_coding	ENST00000311519	CCDS46239.1	GPR113	GENCODE	3240	chr2	-	26532811	26541917	TGTGCATCCAAGAGCATGTCAGAAGGCATTCCATGGCCCTCCTCAGAGGACATGGGCACA	165082	G protein-coupled receptor 113 [Source:HGNC Symbol;Acc:18989]	5.80223	4.43849
ASHGA5P009179	1.15216e-05	0.00075723	2.56616	up	protein_coding	NM_001024630	CCDS43467.2	RUNX2	RefSeq	5553	chr6	+	45296053	45518819	TGCCTAGGCGCATTTCAGATGATGACACTGCCACCTCTGACTTCTGCCTCTGGCCTTCCA	860	runt-related transcription factor 2 isoform a	5.02535	3.66573
ASHGA5P012808	0.0277926	0.0761962	2.56108	up	protein_coding	ENST00000380851	CCDS13031.1	IDH3B	GENCODE	1230	chr20	-	2639040	2644865	AGTTGGCAAGGTTCGAACCTCTGACATGGGTGGCTATGCTACTTGCCATGACTTCACTGA	3420	isocitrate dehydrogenase 3 (NAD+) beta [Source:HGNC Symbol;Acc:5385]	7.25748	5.90073
ASHGA5P042598	1.89586e-05	0.00112286	2.56074	up	protein_coding	NM_182645	CCDS5115.1	VGLL2	RefSeq	2231	chr6	+	117586720	117594728	ACGAAGTCTACGCGCCGCACTTCGACCCGCGCTATGGGCCGCTGCTGATGCCAGCCGCCT	245806	transcription cofactor vestigial-like protein 2 isoform 1	4.47041	3.11385
ASHGA5P005986	6.72354e-06	0.000588155	2.5601	up	protein_coding	ENST00000312165	CCDS7693.1	NLRP6	GENCODE	2679	chr11	+	278569	285304	TTTCAGGCAATGACTGACCCACTGTGCCATCTGAGCAGCCTCACGCTGTCCCACTGCAAA	171389	"NLR family, pyrin domain containing 6 [Source:HGNC Symbol;Acc:22944]"	5.03936	3.68316
ASHGA5P003990	0.0462563	0.101227	2.55694	up	protein_coding	NM_138443	CCDS11928.1	HAUS1	RefSeq	1145	chr18	+	43684297	43708299	CACTATCAGAGAAACTGGCAAGATTAAAGCAACAGACTATACCTTTGAAGAAAAAATTGG	115106	HAUS augmin-like complex subunit 1	6.28635	4.93193
ASHGA5P005144	0.00657138	0.0319079	2.55512	up	protein_coding	NM_001919	CCDS10464.1	ECI1	RefSeq	1069	chr16	-	2289872	2301602	TGAGACCCAGCTGGGCATCATCGCCCCTTTCTGGTTGAAAGACACCCTGGAGAACACCAT	1632	"enoyl-CoA delta isomerase 1, mitochondrial isoform 1 precursor"	5.54279	4.1894
ASHGA5P055029	0.0287756	0.0775701	2.55462	up	protein_coding	NM_005472	CCDS8232.1	KCNE3	RefSeq	3070	chr11	-	74165885	74178600	TATGATCTAACACGAGAGGGCTGGGACGGTGGAAGACCAAGACACCTGGGGATTGCGTCT	10008	potassium voltage-gated channel subfamily E member 3	5.06813	3.71502
ASHGA5P039111	9.85673e-06	0.0007062	2.5537	up	protein_coding	NM_003875	CCDS46941.1	GMPS	RefSeq	2457	chr3	+	155588324	155655520	GCAGTCTGAAATTTTCCCCTTGGAAACACCAGCATTTGCTATAAAGGAACAAGGATTCCG	8833	GMP synthase [glutamine-hydrolyzing]	6.31306	4.96047
ASHGA5P048805	6.60811e-06	0.000585364	2.55308	up	protein_coding	NM_024522	CCDS339.2	NKAIN1	RefSeq	2930	chr1	-	31652591	31712734	GCGCAGCCCCCGGAGCCATGGGCAAGTGCAGCGGGCGCTGCACGCTGGTCGCCTTCTGCT	79570	sodium/potassium-transporting ATPase subunit beta-1-interacting protein 1 precursor	4.24509	2.89285
ASHGA5P037022	0.00311441	0.0209546	2.55236	up	protein_coding	NM_080825	CCDS13223.1	C20orf144	RefSeq	586	chr20	+	32250091	32251721	TGGGAAACTATAGTTCCCACAAAAGGACCAAAGCACCCAAGCAGGCCCGCAAGGAGAGGC	128864	uncharacterized protein C20orf144	4.71224	3.36041
ASHGA5P031526	4.67296e-05	0.00187415	2.55203	up	protein_coding	NM_014117	CCDS10538.1	C16orf72	RefSeq	3996	chr16	+	9185536	9213555	TGTAGTGTCCCCTAACCGAGCTACTTCAACGGAAACTAGCTCATCTGTAGAGACTGATTT	29035	UPF0472 protein C16orf72	5.873	4.52135
ASHGA5P010400	2.95265e-06	0.000349752	2.55095	up	protein_coding	NM_014241	CCDS7121.1	PTPLA	RefSeq	1323	chr10	-	17631957	17659373	CACATTCAGCCTTCTTGACCACTTGCCATACTTCATTAAATGGGCCAGATATAATTTTTT	9200	3-hydroxyacyl-CoA dehydratase 1	4.74144	3.3904
ASHGA5P013157	0.00036464	0.00630661	2.55056	up	protein_coding	NM_004913	CCDS42220.1	C16orf7	RefSeq	2767	chr16	-	89773540	89787394	CCGGCCCCGGGAGGCATACACGGAATACCTGAGGAGCATCCACTATATCTCCCAGGTGTT	9605	uncharacterized protein C16orf7	4.34193	2.99111
ASHGA5P055503	0.000204758	0.00438208	2.54929	up	protein_coding	NM_000706	CCDS8965.1	AVPR1A	RefSeq	4154	chr12	-	63536538	63546590	AACAGTACGGGTATGTGGAAGGACTCGCCTAAATCTTCCAAGTCCATCAAATTCATTCCT	552	vasopressin V1a receptor	4.18641	2.83631
ASHGA5P034072	7.23189e-05	0.00236885	2.54922	up	protein_coding	NM_005101	CCDS6.1	ISG15	RefSeq	685	chr1	+	948846	949919	ACTCATCTTTGCCAGTACAGGAGCTTGTGCCGTGGCCCACAGCCCACAGCCCACAGCCAT	9636	ubiquitin-like protein ISG15 precursor	5.04455	3.69449
ASHGA5P054077	0.00161368	0.0144568	2.54522	up	protein_coding	NM_153333	CCDS14504.1	TCEAL8	RefSeq	1231	chrX	-	102507922	102510121	TAGGCCTTGAATTCATTTTTGCCTAATATTAAAATCTGGCCCCAGCTTTCTTTCTGTTAG	90843	transcription elongation factor A protein-like 8	7.18413	5.83634
ASHGA5P054195	0.0336707	0.0845325	2.54314	up	protein_coding	ENST00000393600	CCDS14751.1	FAM50A	GENCODE	1352	chrX	+	153672472	153679002	ACATCTTTCCCGCCAGCCGCTGGGAACCCTACGACCCTGAAAAGAAGTGGGACAAGTACA	9130	"family with sequence similarity 50, member A [Source:HGNC Symbol;Acc:18786]"	8.30972	6.96311
ASHGA5P009529	0.0233587	0.0692736	2.54304	up	protein_coding	NM_021047	CCDS42532.1	ZNF253	RefSeq	2351	chr19	+	19976713	20004293	AAACCCCCAGTTATGAGTTCTCATTTTGCCCAAGACCTTTGGCCAGAGAACATACAAAAT	56242	zinc finger protein 253	8.62292	7.27637
ASHGA5P030711	0.0155388	0.0539516	2.54193	up	protein_coding	NM_001243531		LOC100505679	RefSeq	498	chr15	+	84841241	84850985	CAGTTCGGTGAGGAAAGAAACCAAGCTATTTTCTCTTTTCCTCATGAACATTATATTTAG	100505679	uncharacterized protein LOC100505679	5.44206	4.09613
ASHGA5P006810	0.0413715	0.0948787	2.54162	up	protein_coding	NM_018155	CCDS3114.1	SLC25A36	RefSeq	4674	chr3	+	140660661	140698785	TCAGCTGCAATGGCAGGTTTTACTGCAATCACAGCAACCAACCCCATTTGGCTTATAAAG	55186	solute carrier family 25 member 36 isoform b	6.13905	4.7933
ASHGA5P019508	0.0436509	0.0978805	2.54021	up	protein_coding	NM_021237	CCDS54597.1	SELK	RefSeq	832	chr3	-	53919225	53925989	GGAATAGCTGAGTTTGTGGTTTTGTTTTTCAAAACTCTGCTTCAGCAAGATGTGAAAAAA	58515	selenoprotein K	5.28377	3.93882
ASHGA5P045593	0.000422433	0.00686935	2.53952	up	protein_coding	NM_133497	CCDS6447.1	KCNV2	RefSeq	2174	chr9	+	2717525	2730037	TTCTCTGCGGCTGTCTACTCTGTGGAGCACGATGTGCCCAGCACCAACTTCACTACCATC	169522	potassium voltage-gated channel subfamily V member 2	4.7859	3.44134
ASHGA5P003584	0.0448544	0.099333	2.53829	up	protein_coding	NM_001040033	CCDS829.1	CD53	RefSeq	1572	chr1	+	111413820	111442558	TCAAGGAAAACAAGTGTCTGCTTATGTCGTTCTTCATCCTGCTGCTGATTATCCTCCTTG	963	leukocyte surface antigen CD53	5.11513	3.77127
ASHGA5P001815	3.04523e-05	0.00141525	2.53707	up	protein_coding	NM_001501	CCDS13040.1	GNRH2	RefSeq	423	chr20	+	3024267	3026391	ATGCCCTTAGGCCCCCAGGAAGGGCCCTGGACACTGCAGCAGGCAGCCCAGTCCAGACTG	2797	progonadoliberin-2 isoform a preproprotein	6.85942	5.51625
ASHGA5P015746	5.71894e-05	0.00208067	2.53685	up	protein_coding	NM_001142619	CCDS45301.1	STRA6	RefSeq	2839	chr15	-	74471807	74501371	GCCTGCCCAGGCCCCGGGCAGTGCCTGCTGCTGTTTTCATGGTCCTCCTGAGCTCCCTGT	64220	stimulated by retinoic acid gene 6 protein homolog isoform b	5.8484	4.50536
ASHGA5P019393	3.32504e-05	0.00149877	2.53668	up	protein_coding	NM_002957	CCDS35172.1	RXRA	RefSeq	5547	chr9	+	137218315	137332431	AGTCGCAGACATGGACACCAAACATTTCCTGCCGCTCGATTTCTCCACCCAGGTGAACTC	6256	retinoic acid receptor RXR-alpha	5.1269	3.78396
ASHGA5P014149	8.013e-06	0.000645295	2.53607	up	protein_coding	NM_130386	CCDS32782.1	COLEC12	RefSeq	3134	chr18	-	319354	500729	GAGGACAATGGCTGCCCGCCTCACTGGAAGAACTTCACAGACAAATGCTACTATTTTTCA	81035	collectin-12	5.65583	4.31323
ASHGA5P009076	0.0382755	0.0907405	2.53567	up	protein_coding	NM_181640	CCDS10808.1	CKLF	RefSeq	729	chr16	+	66586465	66600190	GCTGCGGCTGGATATTATCAACTCACTGGTAACAACAGTATTCATGCTCATCGTATCTGT	51192	chemokine-like factor isoform b	7.2074	5.86504
ASHGA5P038314	0.0121926	0.0466443	2.53402	up	protein_coding	NM_012234		RYBP	RefSeq	4678	chr3	-	72423743	72495774	TTTGGGATTGTAGCGTCTGCACCTTCAGAAACAGTGCTGAAGCCTTTAAATGCAGCATCT	23429	RING1 and YY1-binding protein	5.04323	3.7018
ASHGA5P034368	5.1762e-07	0.00011463	2.53192	up	protein_coding	NM_033513	CCDS42454.1	TPGS1	RefSeq	1134	chr19	+	507496	519654	AGCCGATCGCCTTCCTGGCTCACTACTTCGAGAACATGGGCCTGCGCTCGCCTGTAAACG	91978	tubulin polyglutamylase complex subunit 1	4.66322	3.32299
ASHGA5P054002	0.0189284	0.0607509	2.53106	up	protein_coding	NM_004493	CCDS14354.1	HSD17B10	RefSeq	963	chrX	-	53458205	53461323	AATAGTGGGCATGACACTGCCCATTGCTCGGGATCTGGCTCCCATAGGTATCCGGGTGAT	3028	3-hydroxyacyl-CoA dehydrogenase type-2 isoform 1	4.63797	3.29823
ASHGA5P037816	7.63054e-05	0.00242913	2.52925	up	protein_coding	ENST00000354336	CCDS13785.1	CRKL	GENCODE	5325	chr22	+	21271713	21308037	CTTTGCGAAAGCAATCCAGAAAAGAGTACCCTGTGCTTATGACAAGACTGCCTTGGCATT	1399	v-crk sarcoma virus CT10 oncogene homolog (avian)-like [Source:HGNC Symbol;Acc:2363]	4.91056	3.57185
ASHGA5P053540	0.0201448	0.0631625	2.52669	up	protein_coding	NM_032334	CCDS6320.1	UTP23	RefSeq	3693	chr8	+	117778741	117786921	AGAAAAAGAATTCGGAACAGATCTAACCCAAAAGTACTTTCTGAGAAGCAGAATGCAGAA	84294	rRNA-processing protein UTP23 homolog	6.17017	4.83292
ASHGA5P013055	0.00749395	0.0343878	2.52661	up	protein_coding	NM_001122731	CCDS46660.1	MICAL3	RefSeq	3384	chr22	-	18317100	18507325	TTTGAAGAGAATGCGCCCGCACAGTCCATCGGCATACGGAGACAGGGCTCCATGAAGAAG	57553	protein-methionine sulfoxide oxidase MICAL3 isoform 3	4.71074	3.37353
ASHGA5P053725	0.00381263	0.0235675	2.52261	up	protein_coding	NM_000689	CCDS6644.1	ALDH1A1	RefSeq	2378	chr9	-	75515577	75568233	CTATGGCGTGGTAAGTGCCCAGTGCCCCTTTGGTGGATTCAAGATGTCTGGAAATGGAAG	216	retinal dehydrogenase 1	6.36346	5.02854
ASHGA5P041040	1.339e-08	1.0555e-05	2.5218	up	protein_coding	ENST00000330120	CCDS3900.1	RXFP3	GENCODE	2533	chr5	+	33936490	33939023	AAGAAACGCTTTTGGAGTTAAGAAAAAGAACTGACCATCCTGGTCCGCCCACAGGAGAAA	51289	relaxin/insulin-like family peptide receptor 3 [Source:HGNC Symbol;Acc:24883]	4.3731	3.03865
ASHGA5P001234	0.0397062	0.0925599	2.52143	up	protein_coding	NM_018465	CCDS6463.1	PLGRKT	RefSeq	1020	chr9	-	5357966	5437937	AGAATGAAAGGTGAAGCTGAGGACATACTGGAAACAGAAAAGAGTAAATTGCAGCTGCCA	55848	plasminogen receptor (KT)	6.24364	4.9094
ASHGA5P046932	5.9248e-07	0.000123175	2.52108	up	protein_coding	NM_014767	CCDS7313.1	SPOCK2	RefSeq	5345	chr10	-	73818791	73848790	TGAAACTCCATGGAAACAAAGACTCCATCTGCAAGCCCTGCCACATGGCCCAGCTTGCCT	9806	testican-2 isoform 2 precursor	4.94582	3.61178
ASHGA5P006606	0.0167201	0.0565695	2.52095	up	protein_coding	ENST00000320936	CCDS12059.1	CIRBP	GENCODE	1397	chr19	+	1269266	1273171	GTTATGACAGTTACGCTACACACAACGAGTAAAAACCCTTCCTGCTCAAGATCGTCCTTC	1153	cold inducible RNA binding protein [Source:HGNC Symbol;Acc:1982]	7.73543	6.40146
ASHGA5P018897	0.0122425	0.0467372	2.51923	up	protein_coding	NM_003818	CCDS13088.1	CDS2	RefSeq	9323	chr20	+	5107406	5178533	TTGCGCCACCCGAGGACAAGGAGTCAGAGTCAGAAGCAAAGGTAGATGGAGAGACTGCAT	8760	phosphatidate cytidylyltransferase 2	6.56891	5.23593
ASHGA5P004275	0.00782994	0.0353093	2.51732	up	protein_coding	NM_001033518	CCDS47531.1	WIPI2	RefSeq	4456	chr7	+	5229834	5273486	CTGTTGTCTGGTCCCTAGCTGTTGGTAGTAAGTCCGGTTATAAATTTTTCTCCCTTTCTT	26100	WD repeat domain phosphoinositide-interacting protein 2 isoform c	7.22581	5.89392
ASHGA5P052395	0.015732	0.054363	2.51688	up	protein_coding	NM_017665	CCDS4165.1	ZCCHC10	RefSeq	2136	chr5	-	132332677	132362240	GCAGCTCTGACGATGAACCACCAAAGAAGAAGAAAAAGAAATAGAGTTGCTCCATTCATA	54819	zinc finger CCHC domain-containing protein 10	5.67725	4.34562
ASHGA5P002997	0.0168099	0.0567405	2.5154	up	protein_coding	NM_004226	CCDS2315.1	STK17B	RefSeq	5324	chr2	-	196998306	197036336	GGCCGGAGCGGTAAAAATAAGTGACTAAAGAAGCAGACCTGGGAATCACCTAACATGTCG	9262	serine/threonine-protein kinase 17B	4.72776	3.39697
ASHGA5P035105	1.25478e-06	0.000199726	2.51515	up	protein_coding	NM_017488	CCDS1909.1	ADD2	RefSeq	4119	chr2	-	70889215	70995375	TCTGGTCCGGCCGTGTGCGAGTTCTTCAGCGTTGCCCTCCACATCTGGAGTAACATATTG	119	beta-adducin isoform e	4.86205	3.5314
ASHGA5P051172	0.0116241	0.0452016	2.5151	up	protein_coding	NM_206889	CCDS46656.1	DIP2A	RefSeq	3121	chr21	+	47878861	47970023	TGTGCTGCAGGTGGGCGCCCCGGCACGGCCTATGGTTCGGTGAATCTCCCAAGCTGGCAC	23181	disco-interacting protein 2 homolog A isoform b	5.45661	4.12599
ASHGA5P049738	0.000709368	0.00915885	2.51395	up	protein_coding	NM_031498	CCDS11545.1	GNGT2	RefSeq	1057	chr17	-	47283595	47286743	AAAGGTGGCTGTCTGATAAGCTGATGGCATGGAGCCCTGCCCTGAGTGTCTGTCCCTCTT	2793	guanine nucleotide-binding protein G(I)/G(S)/G(O) subunit gamma-T2	6.78667	5.45671
ASHGA5P005818	0.00861118	0.0374721	2.51264	up	protein_coding	NM_001178142	CCDS54647.1	TFDP2	RefSeq	9185	chr3	-	141663269	141747507	TCAGTTTCAAATTTAGACCTGACCACTGGTGCCACCTTACCCCAGTCAAGTGTAAACCAA	7029	transcription factor Dp-2 isoform 5	6.62161	5.2924
ASHGA5P001592	0.040858	0.0942194	2.51224	up	protein_coding	ENST00000237889	CCDS2336.1	NDUFB3	GENCODE	755	chr2	+	201936461	201950473	TTGCTGTCAGACATGGCCCATGAACATGGACATGAGCATGGACATCATAAAATGGAACTT	4709	"NADH dehydrogenase (ubiquinone) 1 beta subcomplex, 3, 12kDa [Source:HGNC Symbol;Acc:7698]"	6.03392	4.70495
ASHGA5P028019	0.000719879	0.00922441	2.51055	up	protein_coding	NM_001417	CCDS41788.1	EIF4B	RefSeq	4041	chr12	+	53400061	53435993	GAGAAGATTATGCCGAATAGACCTCTACATCCTGTGCTTTTCTCCTAGTTTCTCTCCACC	1975	eukaryotic translation initiation factor 4B	9.21471	7.88671
ASHGA5P006870	5.53e-09	5.633e-06	2.51045	up	protein_coding	NM_198182	CCDS33144.2	GRHL1	RefSeq	3610	chr2	+	10091791	10142412	CAAAAGAAAAGTTTCTGATGTTAAAGTGCCACTGCTTCCCTCTCACAAGCGAATGGATAT	29841	grainyhead-like protein 1 homolog	5.18046	3.85251
ASHGA5P018513	3.30996e-06	0.000383165	2.50824	up	protein_coding	NM_001127691	CCDS53285.1	RHD	RefSeq	2545	chr1	+	25598980	25656936	GTACCTGCCGTTTCCTCATTTGGCTGTTGGATTTTAAGCAAAAGCATCCAAGAAAAACAA	6007	blood group Rh(D) polypeptide isoform 2	4.97024	3.64356
ASHGA5P011602	0.0418528	0.0955308	2.5055	up	protein_coding	NM_031207	CCDS488.2	HYI	RefSeq	1251	chr1	-	43916673	43919660	TTCGTGGGCTGAGACACAGTAGAGGGCTTGAGTTGGCTACGTTCATACTGGGATAGGCGG	81888	putative hydroxypyruvate isomerase isoform 1	5.85846	4.53336
ASHGA5P013473	0.032877	0.0835833	2.50381	up	protein_coding	NM_001005474	CCDS43123.1	NFKBIZ	RefSeq	3801	chr3	+	101546833	101579869	TTTGGCTTTCTTGGCCTGATGCTGAACTCTCGAGGTTGAGCCCCATATGGGGGTTGGCAG	64332	NF-kappa-B inhibitor zeta isoform b	6.30196	4.97784
ASHGA5P011499	5.04422e-06	0.000494091	2.50359	up	protein_coding	NM_002297	CCDS6991.1	LCN1	RefSeq	789	chr9	+	138413283	138418386	AGCGATTAGGGGCAGGGGACACCTTGGCTCCTCAGCAGCCCAAGGACGGCACCATCCAGC	3933	lipocalin-1 isoform 1 precursor	4.71231	3.38831
ASHGA5P015144	0.00038988	0.00654317	2.5025	up	protein_coding	NM_012418	CCDS45811.1	FSCN2	RefSeq	1690	chr17	+	79495416	79504156	GATTTTGTCGGCAAGGACGAAGAGTTCACCCTCAAGCTCATCAACCGGCCCATCCTGGTG	25794	fascin-2 isoform 1	4.23665	2.91328
ASHGA5P013543	0.0376684	0.0899804	2.50175	up	protein_coding	NM_205858	CCDS42076.1	NMB	RefSeq	1041	chr15	-	85198359	85201802	CCAAATCCAGGAGGCTGCTGGTACAAATACTGCAGAAATGACACCAATAATGGGGCAGAC	4828	neuromedin-B isoform 2 preproprotein	7.40196	6.07902
ASHGA5P001214	0.00443593	0.0259092	2.4992	up	protein_coding	NM_023948	CCDS5701.1	MOSPD3	RefSeq	1213	chr7	+	100210113	100213000	GCATTGACATTGTGATTCGCCATGTGGCACCCATTCCCAGCCACTATGATGTCCAGGACC	64598	motile sperm domain-containing protein 3 isoform a	9.06976	7.74829
ASHGA5P055686	0.0116494	0.0452421	2.49784	up	protein_coding	NM_021009	CCDS9260.1	UBC	RefSeq	2594	chr12	-	125396191	125399587	CCCTCCTGACCAGCAGAGGTTGATCTTTGCCGGAAAACAGCTGGAAGATGGTCGTACCCT	7316	polyubiquitin-C	8.81477	7.49409
ASHGA5P007115	0.000787799	0.00966176	2.4958	up	protein_coding	NM_178339	CCDS43065.1	C3orf35	RefSeq	1558	chr3	+	37440967	37476988	AACATCTTTCCCCTGGACCTTTGGACCCAAGGTAAGAAAACTGAAGTTCAGAAAAGGGAG	339883	AP20 region protein 1 isoform B	6.53776	5.21826
ASHGA5P049074	1.09688e-05	0.000737367	2.49342	up	protein_coding	NM_002582	CCDS45419.1	PARN	RefSeq	3083	chr16	-	14529556	14724128	TTCTATGTTTTCCCGAAACCCTTCAATAGATCCTCACCAGATGTCAAATTTGTTTGTCAG	5073	poly(A)-specific ribonuclease PARN isoform 1	4.36816	3.05003
ASHGA5P000983	0.000366318	0.00631203	2.49331	up	protein_coding	ENST00000381583	CCDS33434.1	SIRPG	GENCODE	1383	chr20	-	1609797	1638425	TTGTCTGAGGCCATCCGAGGCCCGGCATCATCCCTTACTGCGCTGCTCCTCATAGCTGTC	55423	signal-regulatory protein gamma [Source:HGNC Symbol;Acc:15757]	5.60956	4.2915
ASHGA5P004462	1.16719e-05	0.000762187	2.49083	up	protein_coding	NM_145867	CCDS34316.1	LTC4S	RefSeq	680	chr5	+	179220985	179223513	GCGTCTACCGAGCCCAGGTGAACTGCAGCGAGTACTTCCCGCTGTTCCTCGCCACGCTCT	4056	leukotriene C4 synthase	4.24894	2.93232
ASHGA5P013370	0.0338266	0.084854	2.48941	up	protein_coding	NM_001223	CCDS8329.1	CASP1	RefSeq	1330	chr11	-	104896236	104905884	TCCACACCAGATAATGTTTCTTGGAGACATCCCACAATGGGCTCTGTTTTTATTGGAAGA	834	caspase-1 isoform beta precursor	7.38841	6.0726
ASHGA5P046525	2.07691e-06	0.000274772	2.48484	up	protein_coding	NM_001080489	CCDS55410.1	GLOD5	RefSeq	747	chrX	+	48620153	48632064	CTGCGCCATCTGCCCTCCAGGCTGCCAGTCAAGATGTGGGGCAGGACTTTGGAGAAACAG	392465	glyoxalase domain-containing protein 5	7.6103	6.29715
ASHGA5P006108	0.0134024	0.0493742	2.48411	up	protein_coding	NM_031370	CCDS3592.1	HNRNPD	RefSeq	2257	chr4	-	83274466	83295149	AGAGGTGGTGGCCCCAGTCAAAACTGGAACCAGGGATATAGTAACTATTGGAATCAAGGC	3184	heterogeneous nuclear ribonucleoprotein D0 isoform a	5.17265	3.85993
ASHGA5P007333	0.0352452	0.0867376	2.48406	up	protein_coding	NM_033318	CCDS14031.1	C22orf32	RefSeq	1585	chr22	+	42475694	42480288	TGACTAACAGGAATTACAGAAAGGAGAAAGCACTAACTGAAGAAATGGTGATGCTCTCAG	91689	"UPF0466 protein C22orf32, mitochondrial precursor"	6.12062	4.80792
ASHGA5P009047	0.000684037	0.00898511	2.4823	up	protein_coding	NM_012410	CCDS10658.1	SEZ6L2	RefSeq	3364	chr16	-	29882479	29910585	TACCTGCCAGGGCCTCCCCTTGGGCCTGAGGGAGGAGAGGAGGAGACGACGACCACCATC	26470	seizure 6-like protein 2 isoform 1 precursor	6.31426	5.00258
ASHGA5P054742	0.0307834	0.0803667	2.48212	up	protein_coding	NM_014267	CCDS7822.1	C11orf58	RefSeq	3980	chr11	+	16760147	16779901	CAAAAAGCAATTATAAAATGATGTTTGTTAAATCCAGTGGTTCATAACTCCCAAACGCTT	10944	small acidic protein	6.32425	5.01267
ASHGA5P048624	0.00835691	0.0367581	2.4812	up	protein_coding	NM_006600	CCDS292.1	NUDC	RefSeq	1813	chr1	+	27248212	27273362	TTTTTCCAAGGCTAAATTCAACTAGCCCCTGTTTTTTCCTCCCTGAACTCTTGGGGCTGA	10726	nuclear migration protein nudC	9.31874	8.0077
ASHGA5P004487	0.00156981	0.0142022	2.47883	up	protein_coding	NM_012448	CCDS11423.1	STAT5B	RefSeq	5171	chr17	-	40351194	40428424	TATACTCCAAATACTACACACCAGTTCCCTGCGAGTCTGCTACTGCTAAAGCTGTTGATG	6777	signal transducer and activator of transcription 5B	4.77339	3.46373
ASHGA5P006905	0.00568944	0.0294827	2.47779	up	protein_coding	NM_032737	CCDS12090.1	LMNB2	RefSeq	4644	chr19	-	2428162	2456966	ATCTTTTCCACCAACAGGGGGACCCGAGGACCACCTCAAGAGGCTGCTACGTGATGTGAA	84823	lamin-B2	6.75324	5.44418
ASHGA5P003797	0.0053159	0.0285311	2.47764	up	protein_coding	NM_145201	CCDS6403.2	NAPRT1	RefSeq	1715	chr8	-	144656954	144660513	GCAGGGACAGCTGTGTGAGCCGCTCCCATCCCTGGCAGAGTCTAGAGCCTTGGCCCAGCT	93100	nicotinate phosphoribosyltransferase	10.5968	9.28787
ASHGA5P007148	0.0144675	0.0516941	2.47629	up	protein_coding	NM_178586	CCDS9965.1	PPP2R5C	RefSeq	4328	chr14	+	102276139	102394328	TAAAATAGAAAATCTAGCCAAAGCCAATCCCCAGGCACAGAAAGATCCGAAGAAGGACCG	5527	serine/threonine-protein phosphatase 2A 56 kDa regulatory subunit gamma isoform isoform b	10.3729	9.0647
ASHGA5P013267	0.0165816	0.056268	2.47457	up	protein_coding	NM_198929	CCDS30907.1	PYHIN1	RefSeq	1995	chr1	+	158901336	158946849	CAACAACCCCATCCAGCAGTTCCTTCACCAAGGTCACCAAGGACAAGGATATCAAATAAC	149628	pyrin and HIN domain-containing protein 1 isoform beta 1	8.45467	7.1475
ASHGA5P002053	1.76035e-05	0.00106742	2.47361	up	protein_coding	NM_004693	CCDS8827.1	KRT75	RefSeq	2125	chr12	-	52817853	52828110	AGGGAGTTTCTCCAGTTAACATTTCTGTGGTCACCTCTACTCTTTCCAGTGGCTATGGAA	9119	"keratin, type II cytoskeletal 75"	4.15784	2.85123
ASHGA5P038375	5.92364e-05	0.00214748	2.46985	up	protein_coding	NM_001146156	CCDS54628.1	GSK3B	RefSeq	7095	chr3	-	119540801	119813264	ATACAGAGTTGCCAGACACTATAGTCGAGCCAAACAGACGCTCCCTGTGATTTATGTCAA	2932	glycogen synthase kinase-3 beta isoform 2	4.44424	3.13981
ASHGA5P003829	0.0281061	0.0767401	2.46963	up	protein_coding	NM_022079	CCDS41533.1	HERC4	RefSeq	4531	chr10	-	69681655	69835103	TATATCAACTGGGTCCAACAGCAGGCCTATGGAATGGATGTCAACCATGGATTAACTGAG	26091	probable E3 ubiquitin-protein ligase HERC4 isoform a	6.52048	5.21618
ASHGA5P049387	0.0274359	0.0756723	2.46894	up	protein_coding	NM_017702	CCDS45555.1	DEF8	RefSeq	932	chr16	+	90015138	90025774	ACCTGCACAGGTGGGCCGAGACCCAGACGAGGAGTGAGGAATGAGAGAGACCAAAGTTCC	54849	differentially expressed in FDCP 8 homolog isoform 2	5.79616	4.49226
ASHGA5P016816	0.0256666	0.0729942	2.46747	up	protein_coding	NM_001195035	CCDS53441.1	MR1	RefSeq	7479	chr1	+	181002560	181031074	CAAAGAACAGAGCAAAATGGAGCCATCTACCTTCCAACACCAGATCGATGATTGCAGATC	3140	major histocompatibility complex class I-related gene protein isoform 4 precursor	5.68508	4.38205
ASHGA5P046549	0.0219913	0.0666147	2.46517	up	protein_coding	ENST00000374971	CCDS35304.1	PAGE2B	GENCODE	493	chrX	+	55101503	55105336	CAAGCAAGACAAATGAAGACTGAAACCAAGAACGTTATTCTTAATCTGGAAATTTGACTG	389860	"P antigen family, member 2B [Source:HGNC Symbol;Acc:31805]"	4.51067	3.20898
ASHGA5P011266	5.8937e-07	0.000123175	2.46226	up	protein_coding	NM_005063	CCDS7493.1	SCD	RefSeq	5473	chr10	+	102106771	102124588	CCGGCATCCGAGAGCCAAGATGCCGGCCCACTTGCTGCAGGACGATATCTCTAGCTCCTA	6319	acyl-CoA desaturase	4.63015	3.33017
ASHGA5P010442	0.000100737	0.00289891	2.46175	up	protein_coding	NM_181829	CCDS13864.1	NF2	RefSeq	5968	chr22	+	29999544	30094589	GGACAAGAAGGTAAAGAAGCAGATTTTAGATGAAAAGATCTACTGCCCTCCTGAGGCTTC	4771	merlin isoform 6	3.97878	2.67909
ASHGA5P053620	0.0344693	0.0856017	2.4616	up	protein_coding	NM_014066	CCDS6436.1	COMMD5	RefSeq	1475	chr8	-	146075550	146078452	AGAAGAGGTGTGAGCGCAGACTGCAGGACTGACCCCTCACTTGACCAGTCCCATTCAGAT	28991	COMM domain-containing protein 5	9.20796	7.90836
ASHGA5P055315	0.0360681	0.0877959	2.46106	up	protein_coding	NM_015954	CCDS44838.1	DERA	RefSeq	1741	chr12	+	16064185	16190315	GATCTTCCAATGTCTTAAATCAGTCACCAGTTCCAGAAAAGTTCTTTACGACAATGTTTA	51071	putative deoxyribose-phosphate aldolase	5.20808	3.9088
ASHGA5P012156	0.0183771	0.0597917	2.4596	up	protein_coding	NM_205838	CCDS4705.2	LST1	RefSeq	676	chr6	+	31553955	31556686	TCCCTGATCCCTGACCTAATGTTATCGCGGAATGATGTAAAGAGGCTGGAGAGGAGCTGG	7940	leukocyte-specific transcript 1 protein isoform 3	7.58819	6.28976
ASHGA5P026658	0.00826302	0.0365032	2.45798	up	protein_coding	ENST00000529803	CCDS53682.1	OMP	GENCODE	492	chr11	+	76813885	76814377	TTTGGCGAGGGTGTGGAGCCCGCCAACCTCAAGGCCTCCGTGGTTTTTAACCAGCTCTGA	4975	olfactory marker protein [Source:HGNC Symbol;Acc:8136]	5.10588	3.80841
ASHGA5P032065	0.0489055	0.104313	2.4577	up	protein_coding	NM_006224	CCDS45563.1	PITPNA	RefSeq	3660	chr17	-	1421282	1466110	CAAAAGGACCCAGTGAAAGGAATGACAGCAGATGACTAAAGCCGCCTTTCCCCTCTGCAC	5306	phosphatidylinositol transfer protein alpha isoform	7.20728	5.90997
ASHGA5P006099	2.8363e-05	0.00136348	2.45705	up	protein_coding	NM_000043	CCDS7393.1	FAS	RefSeq	2755	chr10	+	90750287	90775542	ATGTGAACACTGTGACCCTTGCACCAAATGTGAACATGGAATCATCAAGGAATGCACACT	355	tumor necrosis factor receptor superfamily member 6 isoform 1 precursor	7.41878	6.12185
ASHGA5P006786	0.00923385	0.0391513	2.4569	up	protein_coding	NM_005839	CCDS255.1	SRRM1	RefSeq	3952	chr1	+	24969593	24999772	TCAGGTAAAGTGACAAAACATAAAGGTACTGAGAAAAGAGAATCCCCTTCACCAGCACCG	10250	serine/arginine repetitive matrix protein 1	7.23873	5.94189
ASHGA5P001922	0.0108044	0.0431116	2.45579	up	protein_coding	NM_016200	CCDS5775.1	NAA38	RefSeq	12520	chr7	+	117824085	117844093	GTCCGCTTTGGAGAACTACATCAACCGAACTGTTGCCGTTATTACATCAGATGGGAGAAT	51691	"N-alpha-acetyltransferase 38, NatC auxiliary subunit"	6.98572	5.68953
ASHGA5P012801	0.0261477	0.0737735	2.4555	up	protein_coding	NM_001135919	CCDS45021.1	SLC46A3	RefSeq	2828	chr13	-	29274217	29293150	CTTCAGACAGAGCCTGTTAAGCTGCTATTGATAGTCGGAGCTTATATACTGTGACTTCTG	283537	solute carrier family 46 member 3 isoform b precursor	5.09994	3.80392
ASHGA5P008020	0.000161941	0.00384295	2.4533	up	protein_coding	NM_001042472	CCDS42857.1	ABHD12	RefSeq	2140	chr20	-	25280833	25371618	ATTTACAAGAGCCCTGAGCTGCCACGGATACTGAGGGAATTCCTGGGGAAGTCGGAGCCT	26090	monoacylglycerol lipase ABHD12 isoform a	4.63656	3.34183
ASHGA5P055120	0.0332184	0.0839693	2.45119	up	protein_coding	NM_001017534	CCDS31661.1	CARD16	RefSeq	695	chr11	-	104912052	104916051	TTTTCTTAGAACCAATTTTATTGAGCGGTTCTGGAGGAACATACTTCTGCTCCCCTTGCA	114769	caspase recruitment domain-containing protein 16 isoform 1	7.05331	5.75982
ASHGA5P011126	0.0177899	0.0586424	2.45002	up	protein_coding	NM_001779	CCDS888.1	CD58	RefSeq	1153	chr1	-	117057155	117113715	GACAGAACCAACTCCAATTGATTGGTAACAGAAGATGAAGACAACAGCATAACTAAATTA	965	lymphocyte function-associated antigen 3 isoform 1	7.0319	5.73911
ASHGA5P006583	0.0125674	0.0475658	2.44876	up	protein_coding	NM_018026	CCDS8129.1	PACS1	RefSeq	4511	chr11	+	65837823	66012218	GAAACTAACCTCAACCTCTGCCATCACAAGGCAACCTAACATCAAACAGAAGTTTGTGGC	55690	phosphofurin acidic cluster sorting protein 1	4.96963	3.67758
ASHGA5P001903	0.0472135	0.102246	2.44867	up	protein_coding	NM_000631	CCDS13934.1	NCF4	RefSeq	1401	chr22	+	37257029	37274059	TCAGCACCATCAAGGACATCGCGGTGGAGGAAGATCTCAGCAGCACTCCCCTATTGAAAG	4689	neutrophil cytosol factor 4 isoform 1	6.802	5.51
ASHGA5P052217	0.034091	0.0852233	2.44775	up	protein_coding	NM_015384	CCDS47198.1	NIPBL	RefSeq	10389	chr5	+	36876860	37065921	GGAGGAGTCAACGTATTTCGCAGCGTATTACGTAAAATGATTTTTATGTGCTTATATATG	25836	nipped-B-like protein isoform B	6.34849	5.05703
ASHGA5P018435	0.0038445	0.0236692	2.44729	up	protein_coding	NM_001136033	CCDS47935.1	PUF60	RefSeq	1874	chr8	-	144898552	144911196	AGTGACAATGGGCTTTGGAGATCCTCTCTCACCTTTGCAATCGATGGCGGCTCAGCGGCA	22827	poly(U)-binding-splicing factor PUF60 isoform c	5.20926	3.91808
ASHGA5P036159	0.0478643	0.102977	2.44642	up	protein_coding	NM_013310	CCDS2168.1	C2orf27A	RefSeq	1222	chr2	+	132480063	132524977	AAGCTGGACTAATTGAACAAGTATTGCTGAAAATGAGTGCTGTAGATGACATGATAGCAG	29798	uncharacterized protein C2orf27	5.58201	4.29133
ASHGA5P035141	3.91084e-06	0.000437799	2.44482	up	protein_coding	NM_001078170	CCDS42710.2	RGPD2	RefSeq	5528	chr2	-	88056717	88125286	AAAGCCTACGGGGAGCGGTACCTCGCCTCGGTGCAGGGCTCCGCCCCGTCGCCTGGAAAG	729857	RANBP2-like and GRIP domain-containing protein 2	4.66157	3.37184
ASHGA5P006043	0.0320526	0.0823298	2.44421	up	protein_coding	ENST00000313117	CCDS33183.1	SRSF7	GENCODE	2489	chr2	-	38970740	38978636	CAGGTCTATTTCACGACCAAGAAGCAGCCGATCAAAGTCCAGATCTCCATCTCCAAAAAG	6432	serine/arginine-rich splicing factor 7 [Source:HGNC Symbol;Acc:10789]	7.95513	6.66576
ASHGA5P009540	0.00141064	0.0133428	2.44244	up	protein_coding	NM_213649	CCDS7610.1	SFXN4	RefSeq	1400	chr10	-	120900424	120925204	GATGTTTCCAGCCCTGCCTCGGCGGACCAAAGGATACAAGAAGCTTGGAAGCGGAGTCTT	119559	sideroflexin-4	7.66568	6.37736
ASHGA5P018611	0.000486134	0.00752696	2.44104	up	protein_coding	NM_018461		PPP2R2D	RefSeq	2466	chr10	+	133747959	133770053	TGAACAAGAGAATAAAAGCCGCCCTCATTCTAGGGGAGAATATAATGTTTACAGCACCTT	55844	serine/threonine-protein phosphatase 2A 55 kDa regulatory subunit B delta isoform	5.4115	4.124
ASHGA5P056173	0.00134812	0.0129373	2.44076	up	protein_coding	NM_178587	CCDS45163.1	PPP2R5C	RefSeq	1623	chr14	+	102276139	102378962	CAATCCCCAGGTACTAAAAAAGAGAATAACATGAAAACGCCCAGGGTTACTTGAATGTTT	5527	serine/threonine-protein phosphatase 2A 56 kDa regulatory subunit gamma isoform isoform c	8.17814	6.89081
ASHGA5P008007	0.0171761	0.0574247	2.44051	up	protein_coding	NM_001005376	CCDS33041.1	PLAUR	RefSeq	1455	chr19	-	44150246	44174498	GGCACTCACGAACGCTCACTCTGGGGAAGCTGGTTGCCATGTAAAAGTACTACTGCCCTG	5329	urokinase plasminogen activator surface receptor isoform 2 precursor	6.00549	4.71831
ASHGA5P027257	4.38999e-06	0.000462662	2.43512	up	protein_coding	ENST00000334221	CCDS31793.1	C1QL4	GENCODE	2065	chr12	-	49726199	49730971	TTTACTTGCCCCATGCCAGGCGTCTACTTCTTCGCTTACCACGTGCTCATGCGCGGCGGC	338761	"complement component 1, q subcomponent-like 4 [Source:HGNC Symbol;Acc:31416]"	5.10624	3.82225
ASHGA5P006292	0.0206414	0.064201	2.43377	up	protein_coding	NM_145231	CCDS9887.1	EFCAB11	RefSeq	695	chr14	-	90263468	90421089	AGGTATTCAGGGAAGTAGATCGAGATTCAGATGGTCACGTCAGCTTTAGAGACTTTGAAT	90141	EF-hand calcium-binding domain-containing protein 11	4.82144	3.53824
ASHGA5P043555	0.029943	0.0792662	2.43314	up	protein_coding	NM_001172428	CCDS55095.1	KLHL7	RefSeq	1032	chr7	+	23145352	23165669	TTCACTGTGTGATGATCCTTAGTGGCACATGAATGAACGTCCAGATGTTTGTGCAGTAGC	55975	kelch-like protein 7 isoform 3	5.83912	4.5563
ASHGA5P047465	0.0301225	0.0793736	2.43087	up	protein_coding	NM_012339	CCDS7294.1	TSPAN15	RefSeq	1726	chr10	+	71211225	71267423	TGAAAGTGCCTTCCTGGCTCCAGCCATCATCCTCATCCTCCTGGGCGTCGTCATGTTCAT	23555	tetraspanin-15	7.68169	6.40022
ASHGA5P052196	8.80562e-05	0.00265095	2.43034	up	protein_coding	NM_031916	CCDS3879.1	ROPN1L	RefSeq	1093	chr5	+	10441973	10465138	TTCCTCGCAGCGCGCCGCGATTCACCAGCCTGGTCCCTTCTGCGGAGAGCGATGCCGCTT	83853	ropporin-1-like protein	4.66551	3.38435
ASHGA5P021661	0.00487795	0.0272466	2.43033	up	protein_coding	ENST00000537561	CCDS54641.1	NUDT16	GENCODE	5943	chr3	+	131100514	131107674	GTTACTTGAAGCAGCCCTCCATGGACCCATGAAAACTGAGATGAGGACCTTGGTACTAGG	131870	nudix (nucleoside diphosphate linked moiety X)-type motif 16 [Source:HGNC Symbol;Acc:26442]	7.8681	6.58694
ASHGA5P053770	0.00951215	0.0397948	2.43005	up	protein_coding	NM_006808	CCDS6741.1	SEC61B	RefSeq	583	chr9	+	101984569	101992901	CGGGGGCTCCGTAACTTTCTATCCGTCCGCGTCAGCGCCTTGCCACCCTCATCTCCAATA	10952	protein transport protein Sec61 subunit beta	8.18116	6.90018
ASHGA5P051412	7.03184e-06	0.000601961	2.42857	up	protein_coding	NM_001135589	CCDS44201.1	GDAP2	RefSeq	2553	chr1	-	118419843	118472302	TGATGCCAGGGTAAGAAGTACCAGAAGTTCTCCCTCACCTGGTATGGTATATTAACTGTT	54834	ganglioside-induced differentiation-associated protein 2 isoform b	5.48814	4.20803
ASHGA5P009229	0.030318	0.07953	2.42802	up	protein_coding	NM_020194	CCDS2465.1	MFF	RefSeq	2032	chr2	+	228192227	228222549	AAATAAAATTTCAAGGTTCCAGGCACCGATTTCTGCACCGGAGTACACTGTGACACCATC	56947	mitochondrial fission factor	5.73717	4.45739
ASHGA5P010654	0.0298382	0.0791526	2.42697	up	protein_coding	NM_004578	CCDS31050.1	RAB4A	RefSeq	1861	chr1	+	229406878	229440518	AAATATGGGATACAGCAGGACAAGAACGATTCAGGTCCGTGACGAGAAGTTATTACCGAG	5867	ras-related protein Rab-4A	5.80647	4.52732
ASHGA5P012924	9.83659e-06	0.0007062	2.42635	up	protein_coding	NM_054014	CCDS13014.1	FKBP1A	RefSeq	901	chr20	-	1352355	1373816	CCCCAGGAGACGGGCGCACCTTCCCCAAGCGCGGCCAGACCTGCGTGGTGCACTACACCG	2280	peptidyl-prolyl cis-trans isomerase FKBP1A isoform a	4.98551	3.70672
ASHGA5P029650	0.0309487	0.0807153	2.42461	up	protein_coding	NM_001024211	CCDS30874.1	S100A13	RefSeq	667	chr1	-	153591275	153600117	TTCAATGAGTACTGGAGATTGATTGGGGAGCTGGCCAAGGAAATCAGGAAGAAGAAAGAC	6284	protein S100-A13	5.38663	4.10888
ASHGA5P003220	0.034383	0.0855127	2.4239	up	protein_coding	NM_002485	CCDS6249.1	NBN	RefSeq	4639	chr8	-	90945563	90996899	GGAAATGGAGGTACAAAATCAACATGCAAAAGAAGAGTCTCTTGCTGATGATCTTTTTAG	4683	nibrin	6.36131	5.08398
ASHGA5P016366	0.00202585	0.0164441	2.42367	up	protein_coding	NM_001143842	CCDS8758.1	TMEM106C	RefSeq	1606	chr12	+	48357329	48362661	TATGTGACTACTAACGTCTCCCTTATTCCACCTCGGAGTGAGCAACTGGTGAATTTTACC	79022	transmembrane protein 106C isoform a	5.01659	3.73939
ASHGA5P037023	2.18127e-05	0.00119961	2.42131	up	protein_coding	ENST00000330271	CCDS33463.1	ACTL10	GENCODE	2028	chr20	+	32254303	32256331	CCTACCCACAGGGCCCTACTTTATGGCAATAAAGGTGATGCCCCACTTGTGTCCATGCCA	170487	actin-like 10 [Source:HGNC Symbol;Acc:16127]	6.52584	5.25005
ASHGA5P013848	0.0101333	0.0413737	2.41818	up	protein_coding	ENST00000397121	CCDS42539.1	ZNF676	GENCODE	2934	chr19	-	22361902	22379753	GAACCCCCAGTTATATGTTCTCATTTTTCCCAAGAGTTTTGGCCAGAGCAAGGCATAGAA	163223	zinc finger protein 676 [Source:HGNC Symbol;Acc:20429]	12.3953	11.1214
ASHGA5P028906	0.0332104	0.0839693	2.41764	up	protein_coding	ENST00000334163	CCDS921.1	POLR3C	GENCODE	1851	chr1	-	145592604	145610884	TTACAAGAAATAGAGGAGATGATCACAGCTCCTGAACGTCAGCAGCTAGAGACCCTGAAA	10623	polymerase (RNA) III (DNA directed) polypeptide C (62kD) [Source:HGNC Symbol;Acc:30076]	5.81407	4.54047
ASHGA5P015502	0.000962145	0.0107318	2.41674	up	protein_coding	ENST00000420846	CCDS44915.1	CD63	GENCODE	855	chr12	-	56119251	56122776	AATTGCTTTTGTTTTGGGAATTGTCTTTGCCTGCTGCCTCGTGAAGAGTATCAGAAGTGG	967	CD63 molecule [Source:HGNC Symbol;Acc:1692]	8.96135	7.6883
ASHGA5P008204	7.33157e-05	0.00237914	2.41641	up	protein_coding	NM_005920	CCDS1143.1	MEF2D	RefSeq	5888	chr1	-	156433518	156470529	TTTAGATCTGAACAATGCCCAGCGCCTTGGGGTCTCCCAGTCTACTCATTCGCTCACCAC	4209	myocyte-specific enhancer factor 2D	5.08741	3.81455
ASHGA5P010887	0.0398435	0.0927859	2.4159	up	protein_coding	NM_001113206	CCDS44257.1	TSTD1	RefSeq	476	chr1	-	161007421	161008774	ATGGCTGGAGTGTCCGAGTTGGAGAGTGCTCTGCAGATGGAGCCAGCTGCCTTCCAGGCT	100131187	thiosulfate sulfurtransferase/rhodanese-like domain-containing protein 1 isoform 2	5.72339	4.45082
ASHGA5P001311	8.48071e-06	0.000669713	2.41473	up	protein_coding	NM_053056	CCDS8191.1	CCND1	RefSeq	4304	chr11	+	69455872	69469242	ACGCGCAGACCTTCGTTGCCCTCTGTGCCACAGATGTGAAGTTCATTTCCAATCCGCCCT	595	G1/S-specific cyclin-D1	4.92098	3.64912
ASHGA5P053187	3.3595e-05	0.00150763	2.41408	up	protein_coding	NM_152789	CCDS47640.1	FAM133B	RefSeq	2369	chr7	-	92190071	92219706	GGCAGTCTCTCCGGCCCGGTTTCCCTCGGCGTGCTACTGTGCGCTCGATCCAGCACCATG	257415	protein FAM133B isoform 1	7.34958	6.0781
ASHGA5P016743	0.00102239	0.0110329	2.41389	up	protein_coding	NM_001145542	CCDS46214.1	ZSCAN18	RefSeq	2605	chr19	-	58595208	58629793	GCGGCGGGAAGTCTGTGGGTTCTGGCACCACCTGAGCCCACTGGGCATCTGGTCATCCCT	65982	zinc finger and SCAN domain-containing protein 18 isoform 1	4.02564	2.75428
ASHGA5P041704	0.0287134	0.0774792	2.4131	up	protein_coding	ENST00000343677	CCDS4577.1	HIST1H1C	GENCODE	732	chr6	-	26055967	26056699	CAAGAAGAAATAGGCGAACGCCTACTTCTAAAACCCAAAAGGCTCTTTTCAGAGCCACCA	3006	"histone cluster 1, H1c [Source:HGNC Symbol;Acc:4716]"	6.32019	5.0493
ASHGA5P002436	0.000442509	0.00707667	2.41207	up	protein_coding	NM_002492	CCDS3234.1	NDUFB5	RefSeq	1076	chr3	+	179322574	179342288	AAGGCTGCTGCTCCTGTTCGACACAGTGGAGACCATGGGAAAAGACTATTTGTCATCAGA	4711	"NADH dehydrogenase [ubiquinone] 1 beta subcomplex subunit 5, mitochondrial isoform 1 precursor"	6.44708	5.17681
ASHGA5P002529	0.0407331	0.0940286	2.41184	up	protein_coding	ENST00000260605	CCDS1813.1	DYNC2LI1	GENCODE	1399	chr2	+	44001177	44037149	GAAGGATCTGGAACTGGAACAGTACAAAAGAAGTTCTTCCAAGTCTTGGAAACAAATCGA	51626	"dynein, cytoplasmic 2, light intermediate chain 1 [Source:HGNC Symbol;Acc:24595]"	5.32906	4.05893
ASHGA5P005827	9.4641e-07	0.000169142	2.41041	up	protein_coding	NM_001083899	CCDS42626.1	GP6	RefSeq	2268	chr19	-	55525074	55549632	TCTCCAGCTGGTGAGTCCTGCCCGCCAGTACTACACCAAGGGCAACCTGGTCCGGATATG	51206	platelet glycoprotein VI isoform 1 precursor	4.22256	2.95328
ASHGA5P054619	0.00772725	0.0350011	2.40982	up	protein_coding	NM_078469	CCDS7650.1	BCCIP	RefSeq	2373	chr10	+	127512103	127531376	GAAGAGGATTGGAACCAGTTCCGATACAGCACAATGGTTGGTCTGTTCCCCCAGTATTAG	56647	BRCA2 and CDKN1A-interacting protein isoform C	9.59187	8.32294
ASHGA5P042348	4.049e-08	1.7934e-05	2.4094	up	protein_coding	NM_001031722	CCDS54978.1	ATAT1	RefSeq	1740	chr6	+	30594662	30614598	ATGTCCCAATCAAAGGATGTGGTTGACCTGGCCTTTCTGCTTCCTCACAATAACCTTAAG	79969	alpha-tubulin N-acetyltransferase isoform 1 precursor	4.96948	3.70081
ASHGA5P051240	0.000231098	0.00475595	2.4089	up	protein_coding	NM_199127	CCDS13802.2	GGTLC2	RefSeq	855	chr22	+	22988781	22990368	CATGCCCCAGGCCATCATCTACAACCTCTGGTTCGGCTATGACGTGAAGCGGGCCGTGGA	91227	gamma-glutamyltransferase light chain 2 isoform 1	4.89878	3.6304
ASHGA5P008979	9.82014e-06	0.0007062	2.40795	up	protein_coding	NM_016826	CCDS2577.1	OGG1	RefSeq	1957	chr3	+	9791627	9808353	GGGCACCAAGGGCCTCCTTGGCAATGCATTTGATGGCCACCAGCTTCTGCGTCCTCTTAT	4968	N-glycosylase/DNA lyase isoform 2b	5.45003	4.18223
ASHGA5P001298	0.000772916	0.00956856	2.40418	up	protein_coding	NM_001165412	CCDS54783.1	NFKB1	RefSeq	4090	chr4	+	103422485	103538459	TATCAACATGAGAAATGATCTGTACCAGACGCCCTTGCACTTGGCAGTGATCACTAAGCA	4790	nuclear factor NF-kappa-B p105 subunit isoform 2	7.00227	5.73673
ASHGA5P007231	0.0231375	0.068818	2.40319	up	protein_coding	NM_004695	CCDS11713.1	SLC16A5	RefSeq	1940	chr17	+	73084054	73102248	CTGAGATCATGTGCCAGTCTTCCCGCCAGCCACGTCCAGCTGGCGTCAATAAGCATCTTT	9121	monocarboxylate transporter 6	6.01753	4.75258
ASHGA5P021501	0.000102203	0.00292455	2.40286	up	protein_coding	NM_001161660	CCDS55062.1	MYB	RefSeq	3210	chr6	+	135502452	135540311	TATAGTCAATGTCCCTCAGCCAGCTGCCGCAGCCATTCAGACACAGAACCACACATGCAG	4602	transcriptional activator Myb isoform 8	4.71342	3.44867
ASHGA5P001022	5.3485e-06	0.000514011	2.40076	up	protein_coding	NM_012253	CCDS35448.1	TKTL1	RefSeq	2652	chrX	+	153524026	153558713	CGAGCTCCGGCCACCCTACATCATGTAGCAGTTCTTCTGAGATCATGTCTGTGCTGTTCT	8277	transketolase-like protein 1 isoform a	5.71251	4.44903
ASHGA5P037842	9.85372e-05	0.00284362	2.39918	up	protein_coding	ENST00000334793	CCDS30708.1	FOXD2	GENCODE	4675	chr1	+	47901688	47906363	GAAAAATCTGTCTGCCGCCTATTTCCCATTGGTGTCGATTGAATAAATGTATGTGAACTT	2306	forkhead box D2 [Source:HGNC Symbol;Acc:3803]	7.02747	5.76493
ASHGA5P007921	9.2418e-07	0.000169142	2.3984	up	protein_coding	NM_001017437	CCDS33632.2	CCDC157	RefSeq	3023	chr22	+	30752626	30772818	CTGCTCACAGAAACAAGTGACCTAAAGACAAAGATGGCCACCCTGGAGAGAGAACTGAAA	550631	coiled-coil domain-containing protein 157	4.12587	2.8638
ASHGA5P002983	0.0319613	0.0822046	2.39764	up	protein_coding	NM_001005753	CCDS42707.1	CHMP3	RefSeq	3133	chr2	-	86730552	86790620	ACATGAACTCAGTGCTCATGGGGATGAAGAACCAGCTCGCGGTCTTGCGAGTGGCTGGTT	51652	charged multivesicular body protein 3 isoform 2	5.7339	4.47228
ASHGA5P049512	0.03635	0.088086	2.39479	up	protein_coding	NM_004278	CCDS11176.1	PIGL	RefSeq	1163	chr17	+	16120508	16229573	CTGAAGCCTTGAAGGGTTTTCAGATCCAAGGAACAAAGGGGAAAATAGACAAAGGAGTGC	9487	N-acetylglucosaminyl-phosphatidylinositol de-N-acetylase precursor	4.38093	3.12102
ASHGA5P052522	0.000181153	0.00408275	2.39451	up	protein_coding	NM_052899	CCDS4405.1	GPRIN1	RefSeq	4208	chr5	-	176022802	176037131	GGCCGAGTGATCTGCCCCCATTTTGTACGCCCGAGTTTCCGACCTTCTCAGGCTCCCTTC	114787	G protein-regulated inducer of neurite outgrowth 1	9.93642	8.67669
ASHGA5P001192	0.0353206	0.0868269	2.39275	up	protein_coding	NM_005868	CCDS5635.1	BET1	RefSeq	3061	chr7	-	93620999	93633690	GCAGGCCTGGGTGAAGGAGTACCTCCTGGCAACTATGGGAACTATGGCTATGCTAATAGT	10282	BET1 homolog	4.74454	3.48588
ASHGA5P010838	0.0416768	0.095277	2.39163	up	protein_coding	NM_197972	CCDS44274.1	NME7	RefSeq	1615	chr1	-	169101772	169337186	CCTATTAGAGGTTCAATACTTCTTCAAGATCTTGGATAATTAGTGGTGTGGAAAGTAAAG	29922	nucleoside diphosphate kinase 7 isoform b	5.54165	4.28366
ASHGA5P055332	0.0016591	0.0146331	2.38835	up	protein_coding	ENST00000282892	CCDS8711.1	MED21	GENCODE	1753	chr12	+	27175482	27182682	ACAAGAAGTGGTACCCATAGCCAGTCTCTTCCAGACTCATAGCATCAGTGGATACCATGT	9412	mediator complex subunit 21 [Source:HGNC Symbol;Acc:11473]	4.80231	3.5463
ASHGA5P008665	0.0403845	0.0935693	2.38576	up	protein_coding	NM_181641	CCDS10809.1	CKLF	RefSeq	792	chr16	+	66586465	66600190	TTAATGAAGTGGTTATTTTGGCCTTTGCTTGTGTTTGCACTTGTGACAGCAGTATGCTGT	51192	chemokine-like factor isoform d	6.73526	5.48081
ASHGA5P021693	1.42e-09	3.484e-06	2.38466	up	protein_coding	NM_001170718	CCDS54041.1	BCAR1	RefSeq	3282	chr16	-	75262927	75299905	GTCCGTGCCTAACGTGCTGGCCAAAGCGCTCTATGACAATGTGGCCGAGTCCCCGGATGA	9564	breast cancer anti-estrogen resistance protein 1 isoform 5	4.21042	2.95663
ASHGA5P001074	0.00100342	0.0109091	2.38394	up	protein_coding	NM_005881	CCDS10705.1	BCKDK	RefSeq	2097	chr16	+	31119661	31124112	CCATGCACGGCTTTGGCTTCGGGTTGCCCACGTCACGGGCCTACGCGGAGTACCTCGGTG	10295	"[3-methyl-2-oxobutanoate dehydrogenase [lipoamide]] kinase, mitochondrial isoform a"	4.61273	3.35938
ASHGA5P030052	0.00105647	0.0112459	2.38391	up	protein_coding	NM_001136265	CCDS44076.1	IFFO2	RefSeq	5835	chr1	-	19230773	19282826	ATCCACCTCTTGAAGGGGCTCAACGTGCGCTTCCGCTGCTTCCTGGCTAAGGTGCACGAG	126917	intermediate filament family orphan 2	5.15014	3.89681
ASHGA5P014105	0.0476198	0.102689	2.3837	up	protein_coding	NM_152705	CCDS9324.1	POLR1D	RefSeq	2043	chr13	+	28195915	28241559	AGCTGGAGAGGAAAGCAATAGAAGAACTGCTTAAGGAGGCAAAACGTGGGAAAACTAGAG	51082	DNA-directed RNA polymerases I and III subunit RPAC2 isoform 2	4.98768	3.73448
ASHGA5P054999	0.00733412	0.0339518	2.38294	up	protein_coding	NM_022338	CCDS8180.1	C11orf24	RefSeq	2120	chr11	-	68028802	68039469	GCCGTGGTAGACAAAACTCTCCTTCTGGTGGTGCTGTTACTCGGGGTGACCCTTTTCATC	53838	uncharacterized protein C11orf24 precursor	5.90392	4.65118
ASHGA5P014869	9.99398e-06	0.0007062	2.38147	up	protein_coding	ENST00000442650	CCDS44192.1	GSTM2	GENCODE	1478	chr1	+	110210643	110226619	ATGCCTTCCCAAACCTGAAGGACTTCATCTCCCGATTTGAGCATTCCTGATGTTTGGATT	2946	glutathione S-transferase mu 2 (muscle) [Source:HGNC Symbol;Acc:4634]	5.10007	3.84822
ASHGA5P053383	0.0375771	0.0898376	2.38127	up	protein_coding	NM_001135694	CCDS47850.1	VDAC3	RefSeq	1557	chr8	+	42249278	42263455	AGGTCACAAGGTTGGCTTGGGATTTGAACTGGAAGCTTAATGTGGTTTGAGGAAAGCATC	7419	voltage-dependent anion-selective channel protein 3 isoform 2	6.11681	4.86508
ASHGA5P006946	0.00821909	0.0363718	2.38118	up	protein_coding	NM_080616	CCDS13202.1	C20orf112	RefSeq	6120	chr20	-	31030861	31071385	TCCAGCCCAGGATGAGACTTCTGTGAGCAGCGAGGATTTTGATATGAGCGACTCCACATG	140688	uncharacterized protein C20orf112 isoform 2	5.06454	3.81287
ASHGA5P050078	2.83351e-05	0.00136348	2.38043	up	protein_coding	NM_032152	CCDS45954.2	PRAM1	RefSeq	2235	chr19	-	8554939	8567538	CAGAAGCCACAGTCACTTCCTGAAGGCAGCGGCCCCAGCTCGGGTCCCACTCATCCCATG	84106	PML-RARA-regulated adapter molecule 1	4.78695	3.53573
ASHGA5P004500	0.00141053	0.0133428	2.38038	up	protein_coding	ENST00000293636	CCDS8812.1	CELA1	GENCODE	952	chr12	-	51722226	51740463	GATAAATAATGTCATCGCCTCCAACTGAACATTTTCCTGAGTCCAACGACCTTCCCAAAA	1990	"chymotrypsin-like elastase family, member 1 [Source:HGNC Symbol;Acc:3308]"	6.75143	5.50024
ASHGA5P004065	0.0493637	0.104917	2.3803	up	protein_coding	NM_022488	CCDS2966.1	ATG3	RefSeq	1372	chr3	-	112251358	112280485	TCAGTTCACCCATGCAGGCATGCTGAGGTGATGAAGAAAATCATTGAGACTGTTGCAGAA	64422	ubiquitin-like-conjugating enzyme ATG3	7.01395	5.7628
ASHGA5P010259	0.018466	0.0599129	2.37891	up	protein_coding	NM_020365	CCDS517.1	EIF2B3	RefSeq	2027	chr1	-	45316193	45452394	ATCAAGGACTGCTTGATTGGAAGTGGCCAGAGGATTGAAGCCAAAGCTAAACGAGTGAAT	8891	translation initiation factor eIF-2B subunit gamma isoform 1	6.15258	4.90228
ASHGA5P001650	0.0104878	0.0422933	2.37834	up	protein_coding	NM_005827	CCDS11552.1	SLC35B1	RefSeq	1186	chr17	-	47778689	47785282	GTGTTCCTGGGTCTTGGTCTTGATGCCAAGTTTGGGAAAGGAGCTAAGAAGACATCCCAC	10237	solute carrier family 35 member B1	7.70578	6.45582
ASHGA5P010194	0.0143291	0.0515249	2.37693	up	protein_coding	NM_018837	CCDS13408.1	SULF2	RefSeq	3909	chr20	-	46286149	46414808	CCCCCGGACTCGAAACATGGACCTGGGACTTAAAGATGGAGGAAGCTATGAGCAATACAG	55959	extracellular sulfatase Sulf-2 isoform a precursor	6.45604	5.20695
ASHGA5P052033	0.000173337	0.00401314	2.37434	up	protein_coding	NM_021227	CCDS3681.1	OSTC	RefSeq	1092	chr4	+	109571740	109588978	TGGGGCTTGAGGCCGAGAACGGCCCTTGCTGCCACCAACATGGAGACTTTGTACCGTGTC	58505	oligosaccharyltransferase complex subunit OSTC isoform 1	4.08129	2.83377
ASHGA5P011002	0.0438786	0.098132	2.37346	up	protein_coding	ENST00000368733	CCDS1038.1	S100A8	GENCODE	523	chr1	-	153362507	153363664	TCTTTCAGAAGACCTGGTGGGGCAAGTCCGTGGGCATCATGTTGACCGAGCTGGAGAAAG	6279	S100 calcium binding protein A8 [Source:HGNC Symbol;Acc:10498]	7.41988	6.17288
ASHGA5P009871	0.00129366	0.0127206	2.37258	up	protein_coding	NM_213725	CCDS10234.1	RPLP1	RefSeq	437	chr15	+	69745158	69747884	ATGAGGTGACAGTCACGGCCCTGGCCAACGTCAACATTGGGAGCCTCATCTGCAATGTAG	6176	60S acidic ribosomal protein P1 isoform 2	9.4847	8.23824
ASHGA5P051476	0.00319203	0.021267	2.37195	up	protein_coding	NM_145044	CCDS2720.2	ZNF501	RefSeq	3107	chr3	+	44771097	44778575	TACAAGCAGCATGAATTCCAGCCAAATATCACTCAGAATGAAACATGGGAGAGTTAACAT	115560	zinc finger protein 501	4.75331	3.50723
ASHGA5P046826	0.0312163	0.0811142	2.37066	up	protein_coding	NM_001001722	CCDS35473.1	CDY2B	RefSeq	1960	chrY	+	20137667	20139627	AACCCCTTATACGACCTTTGGACAGAGTCCAGATGGCTGTTCTTCTATTACATTCCCCAA	203611	testis-specific chromodomain protein Y 2	6.83085	5.58557
ASHGA5P049804	0.00032925	0.00588434	2.36695	up	protein_coding	NM_001318	CCDS42370.1	CSHL1	RefSeq	661	chr17	-	61986964	61988618	CCACCTGACTGGGCAGACCCTCAAGCAGACCTACAGCAAGTTTGACACAAACTCGCACAA	1444	chorionic somatomammotropin hormone-like 1 isoform 3	4.46519	3.22216
ASHGA5P003930	0.0369948	0.0889464	2.3669	up	protein_coding	NM_003677	CCDS45003.1	DENR	RefSeq	3061	chr12	+	123237370	123255953	ATGGCCAGAGGTAGATGATGACAGCATCGAAGATCTTGGAGAAGTAAAGAAGTGAATTTG	8562	density-regulated protein	4.80872	3.56573
ASHGA5P009977	0.0352099	0.0867015	2.36684	up	protein_coding	NM_145112	CCDS9772.1	MAX	RefSeq	2041	chr14	-	65541844	65569227	GGAGAGCGACGCTGACAAACGGGCTCATCATAATGCACTGGAACGAAAACGTAGGGACCA	4149	protein max isoform b	4.46649	3.22352
ASHGA5P050585	5.1244e-07	0.00011463	2.36565	up	protein_coding	NM_207519	CCDS33255.1	ZAP70	RefSeq	1468	chr2	+	98350868	98356323	GTGTGCCCAGCACGCATAACGTCCCCAGACAAACCGCGGCCGATGCCCATGGACACGAGC	7535	tyrosine-protein kinase ZAP-70 isoform 2	4.19953	2.9573
ASHGA5P046277	0.000118983	0.00312393	2.36306	up	protein_coding	NM_022977	CCDS14548.1	ACSL4	RefSeq	5351	chrX	-	108884563	108976621	GCTGCCTGTCCACTTGTTAATAACAATATACAGTGCCCTTATATTTATTCCATGGTATTT	2182	long-chain-fatty-acid--CoA ligase 4 isoform 2	5.70365	4.463
ASHGA5P001786	0.0318495	0.0821338	2.36258	up	protein_coding	NM_001003805	CCDS32076.1	ATP5S	RefSeq	1687	chr14	+	50779046	50792946	GATCACATGGAAACCTCAAATATTTGTTGTTAAGTGATCTTCCTGGAGTAAGAGAAAAAG	27109	"ATP synthase subunit s, mitochondrial isoform b precursor"	6.24489	5.00453
ASHGA5P011207	0.0100152	0.0410232	2.36117	up	protein_coding	NM_007269	CCDS790.1	STXBP3	RefSeq	2522	chr1	+	109289284	109352148	TATAGAAAAGCTCTGCAAAACTGAACAGGACCTGGCACTTGGAACTGATGCAGAAGGACA	6814	syntaxin-binding protein 3	4.72258	3.48308
ASHGA5P004351	0.00258575	0.0188356	2.36055	up	protein_coding	NM_006763	CCDS1437.1	BTG2	RefSeq	2718	chr1	+	203274663	203278729	AGGAGGCACTCACAGAGCACTACAAACACCACTGGTTTCCCGAAAAGCCGTCCAAGGGCT	7832	protein BTG2	5.39884	4.15972
ASHGA5P050155	0.0110603	0.043858	2.35999	up	protein_coding	NM_001806	CCDS12432.1	CEBPG	RefSeq	3784	chr19	+	33864574	33873592	AGGACAGTAGACCTCACCCTTTCCAGACTTTAGAGCTTGTGGCTTGAATGTTAAAGGTGT	1054	CCAAT/enhancer-binding protein gamma	8.36924	7.13046
ASHGA5P049959	0.0298755	0.0791526	2.3596	up	protein_coding	NM_022068		PIEZO2	RefSeq	9733	chr18	-	10670243	11148761	GACCGACGCGATGGCCTCAGAAGTGGTGTGCGGGCTCATCTTCAGGCTGCTGCTGCCCAT	63895	piezo-type mechanosensitive ion channel component 2	5.40823	4.16969
ASHGA5P045328	1.8564e-07	5.5621e-05	2.35945	up	protein_coding	ENST00000375419	CCDS43850.1	C9orf129	GENCODE	1154	chr9	-	96080480	96108696	ATATACAATCTATTGGGGATTCCGTGCCACTGACCACCATGTACAAGGAAGGGATTCACA	445577	chromosome 9 open reading frame 129 [Source:HGNC Symbol;Acc:31116]	4.14488	2.90643
ASHGA5P007291	3.59889e-05	0.00159399	2.35907	up	protein_coding	NM_020414	CCDS9918.1	DDX24	RefSeq	2967	chr14	-	94517267	94547558	TATTCCTAAAGTCCAGCATGTCATCCATTACCAGGTCCCACGTACCTCGGAGATTTATGT	57062	ATP-dependent RNA helicase DDX24	4.63638	3.39816
ASHGA5P005795	0.0327203	0.0834339	2.35837	up	protein_coding	NM_197954	CCDS8617.1	CLEC7A	RefSeq	519	chr12	-	10279921	10282868	GGTACCATGGCTGGTTTCAAAGCTGTGGAATTCAAAGGATAAATTAATGAAGAAAACAAG	64581	C-type lectin domain family 7 member A isoform f	8.17528	6.93749
ASHGA5P008754	0.0042371	0.0252565	2.35803	up	protein_coding	ENST00000346736	CCDS12299.1	C19orf57	GENCODE	2420	chr19	-	13993167	14016909	CCCAGCCGAGCCGGCTGATCATGGGCACCCACCGGGACCTGGAAGCTTTCAAGCGCCTTA	79173	chromosome 19 open reading frame 57 [Source:HGNC Symbol;Acc:28153]	6.03128	4.7937
ASHGA5P030941	0.0389281	0.091521	2.35588	up	protein_coding	ENST00000344836	CCDS32385.1	USP7	GENCODE	5412	chr16	-	8985950	9057341	AAAGGCCATTAAAATCCATAACTGATTTCCAAGCTGGTGTGTTCAAGGCGAGGACGGTGT	7874	ubiquitin specific peptidase 7 (herpes virus-associated) [Source:HGNC Symbol;Acc:12630]	6.30901	5.07275
ASHGA5P055365	0.0279817	0.0765098	2.35433	up	protein_coding	NM_181847	CCDS8751.1	AMIGO2	RefSeq	3849	chr12	-	47469489	47473734	GACACACCTTTTGTGGCGTCCACTTAATTTGTGCCTATATTTGTATGATGTCATAATTTA	347902	amphoterin-induced protein 2 precursor	5.93186	4.69654
ASHGA5P044014	0.00368067	0.0230671	2.35219	up	protein_coding	NM_175571	CCDS34777.1	GIMAP8	RefSeq	3952	chr7	+	150147961	150176483	AGTCTTTGGTGAATACGAACGGAGGACCCTATCATGTGAACTTCAAAACTGAAGGCAGCA	155038	GTPase IMAP family member 8	5.5417	4.30769
ASHGA5P053997	4.9849e-07	0.00011463	2.35091	up	protein_coding	NM_001097592	CCDS48120.2	XAGE1A	RefSeq	622	chrX	-	52255219	52260363	ATCGGCCCCTTCGCCAGTGTGGGGAACGCGGCGGAGCTGTGAGCCGGCGACTCGGGTCCC	653219	G antigen family D member 2 isoform a	5.22942	3.9962
ASHGA5P011608	0.0287056	0.0774792	2.35067	up	protein_coding	NM_001171080	CCDS55472.1	RBM41	RefSeq	5141	chrX	-	106305117	106362057	TGTGCTACAGGTTGAAGAAGCTGAGTGGAAGCAAAACTGTCTTGTACTAAAGAACTGACT	55285	RNA-binding protein 41 isoform 2	4.72375	3.49068
ASHGA5P006794	0.00488927	0.0272766	2.35062	up	protein_coding	NM_005590	CCDS8298.1	MRE11A	RefSeq	5164	chr11	-	94150468	94227040	AGAGGAAGAGCCTTTAAATCTACAAGACAGCAGCCTTCCCGAAATGTCACTACTAAGAAT	4361	double-strand break repair protein MRE11A isoform 2	5.10018	3.86714
ASHGA5P006247	1.68591e-05	0.0010346	2.3506	up	protein_coding	NM_006840	CCDS12885.1	LILRB5	RefSeq	2279	chr19	-	54754269	54761167	GAGCTGGTGGCGACAGGATTCTATGCAGAACCCACTCTTTTAGCCCTGCCGAGTCCTGTG	10990	leukocyte immunoglobulin-like receptor subfamily B member 5 isoform 2 precursor	4.28117	3.04814
ASHGA5P050361	0.0261763	0.0737953	2.35059	up	protein_coding	NM_001018067	CCDS30746.1	SERBP1	RefSeq	6764	chr1	-	67873492	67896123	ATTCCCAGCTCTGGCTTAACTGGATGCCATAAGACAACCCTGGTTCCTTTGTGAACCCTT	26135	plasminogen activator inhibitor 1 RNA-binding protein isoform 1	8.68107	7.44805
ASHGA5P007857	0.0174612	0.0579588	2.34674	up	protein_coding	NM_007276	CCDS5398.1	CBX3	RefSeq	2330	chr7	+	26240830	26253227	GCCGCGAACGTAATAGCTCTTCAAGTCTGCAATAAAAAATGGCCTCCAACAAAACTACAT	11335	chromobox protein homolog 3	6.19756	4.9669
ASHGA5P050021	0.0439822	0.0982105	2.34521	up	protein_coding	NM_014177	CCDS12003.1	TIMM21	RefSeq	1562	chr18	+	71815745	71826204	TCCCAAGATGATTAAAATAGGGTTTCTGATGGATGTTGAATGGCGTGGACTCGCTACTCC	29090	mitochondrial import inner membrane translocase subunit Tim21 precursor	6.18705	4.95733
ASHGA5P007032	0.024447	0.071175	2.34062	up	protein_coding	NM_001160266	CCDS54077.1	RPAIN	RefSeq	1474	chr17	+	5322960	5336340	TATGTACAAAGCCTGTGATACTTGGGCTGTGATCCTCTAGAGCCAGCTTGGACTCACATC	84268	RPA-interacting protein isoform e	6.92192	5.69503
ASHGA5P042313	0.000718664	0.00922441	2.34005	up	protein_coding	NM_021968	CCDS4630.1	HIST1H4J	RefSeq	356	chr6	+	27791902	27792258	ACGGTTTCGGTGGTTGAGCGTCCCTTTCTATCAATAAAAGGCCCTTTTCAGGGCCACCCT	8363	histone H4	7.16422	5.93768
ASHGA5P011432	0.0195336	0.061836	2.33973	up	protein_coding	NM_152285	CCDS7049.1	ARRDC1	RefSeq	1621	chr9	+	140500095	140509812	TTCCTCCAGAGTACAGTTCTTGGGGCTACCCCTATGAGGCCCCACCGTCTTATGAGCAGA	92714	arrestin domain-containing protein 1	6.25784	5.0315
ASHGA5P051817	0.0268803	0.0747759	2.33784	up	protein_coding	NM_001967	CCDS3282.1	EIF4A2	RefSeq	1905	chr3	+	186501360	186507685	CATTTGCTATTTCCATCCTGCAACAGTTGGAGATTGAGTTCAAGGAGACCCAAGCACTAG	1974	eukaryotic initiation factor 4A-II	4.38851	3.16334
ASHGA5P010418	0.000626176	0.00868699	2.33702	up	protein_coding	NM_014947	CCDS30689.1	FOXJ3	RefSeq	5246	chr1	-	42642209	42800903	GCAGCCTGAGATTCTCTTTGTGGCCAGATGGGTTTGTATGGACAGGCTTGTCCATCTGTA	22887	forkhead box protein J3 isoform 1	4.34839	3.12372
ASHGA5P037012	0.034742	0.0859848	2.33597	up	protein_coding	NM_001172132	CCDS54454.1	HCK	RefSeq	2234	chr20	+	30639990	30689657	CCGCTGTCATGAGTTACAGTCCTTCCAGGATGTGCCTCTGAAAATGGATTGCATATAAAT	3055	tyrosine-protein kinase HCK isoform e	7.48775	6.26373
ASHGA5P006675	9.1902e-05	0.00270839	2.33561	up	protein_coding	NM_138316	CCDS7405.1	PANK1	RefSeq	6021	chr10	-	91339253	91403648	ACAGGGACCAGCTTTGGCAACATGATGAGTAAAGAAAAGCGAGATTCCATCAGCAAGGAA	53354	pantothenate kinase 1 isoform gamma	4.31735	3.09355
ASHGA5P030074	8.03734e-05	0.00252372	2.33418	up	protein_coding	NM_134262	CCDS45271.1	RORA	RefSeq	10669	chr15	-	60780482	60884707	CTCCCTGCGCTCTCCGCACCGCGGCTTAAATGATGTATTTTGTGATCGCAGCGATGAAAG	6095	nuclear receptor ROR-alpha isoform d	5.70791	4.48499
ASHGA5P048750	0.0425661	0.0964889	2.33329	up	protein_coding	NM_004663	CCDS10212.1	RAB11A	RefSeq	4943	chr15	+	66161796	66184329	TTGAAACTTCGGCCCTAGACTCTACAAATGTAGAAGCTGCTTTTCAGACAATTTTAACAG	8766	ras-related protein Rab-11A isoform 1	6.89875	5.67639
ASHGA5P001780	7.05446e-05	0.00235459	2.33158	up	protein_coding	NM_004764	CCDS9268.1	PIWIL1	RefSeq	3591	chr12	+	130822432	130856877	ATTACAACTGGCCAGGTGTCATTCGTGTTCCTGCTCCTTGCCAGTACGCCCACAAGCTGG	9271	piwi-like protein 1 isoform 1	5.43624	4.21494
ASHGA5P006029	5.4099e-05	0.00204872	2.33112	up	protein_coding	NM_001144875	CCDS47350.1	DOK3	RefSeq	2354	chr5	-	176928905	176937427	CAGCACAGTGGTCTTGAAGCGGCGGCCCTGCTCCTGGCCGTGACCATGGACCCTCTGGAG	79930	docking protein 3 isoform 2	4.91602	3.69499
ASHGA5P007630	0.037681	0.0899804	2.33077	up	protein_coding	NM_181726	CCDS3841.1	ANKRD37	RefSeq	934	chr4	+	186317839	186321390	GGAAGTGCTGATGTCACGTGGGTTATGAAGAAGTCTGAAGAACGCCTTCATTTCATGCAA	353322	ankyrin repeat domain-containing protein 37	5.66003	4.43922
ASHGA5P012904	0.02194	0.0665099	2.33074	up	protein_coding	NM_001105538	CCDS42238.1	MYBBP1A	RefSeq	4122	chr17	-	4442190	4458681	TCAGAGTGGGGCCAAGAAGAAAGCACAGACTCTGAGATTCACAATCAGCAGCTCTAAAAA	10514	myb-binding protein 1A isoform 1	5.98795	4.76716
ASHGA5P014270	6.5544e-05	0.00226775	2.32958	up	protein_coding	NM_032837	CCDS11693.2	FAM104A	RefSeq	2842	chr17	-	71203491	71228533	AGCGCCTCCGTCCCAGGAAAAGGAGAAGGAATGGCAACGAAGAAGACAACCATCTTCCCC	84923	protein FAM104A isoform 2	5.43325	4.21318
ASHGA5P017733	0.00367756	0.0230671	2.32673	up	protein_coding	NM_001098783	CCDS2888.1	RPP14	RefSeq	3500	chr3	+	58291971	58305920	CCGGCGCGAGGTGTGATCAGCACTGGAAAAGATGCCTGCCCCTGCTGCCACATATGAAAG	11102	ribonuclease P protein subunit p14	9.07224	7.85394
ASHGA5P011852	0.0423427	0.0961503	2.32226	up	protein_coding	ENST00000540010	CCDS6825.1	TRAF1	GENCODE	4303	chr9	-	123664670	123691451	TCTCTCTGAGAACCCGAGGAATGGCGAGGATCAGATCTGCCCCAAATGCAGAGGGGAAGA	7185	TNF receptor-associated factor 1 [Source:HGNC Symbol;Acc:12031]	6.23743	5.0219
ASHGA5P036064	0.0215294	0.0657829	2.32072	up	protein_coding	NM_001205288	CCDS54387.1	LIMS3L	RefSeq	1221	chr2	+	110656008	110664033	GTTCTCCAGAAAAGAAAGCTTGGAAACTTACCCAGTTTGCCTTCCATTTGGGACATGACT	100288695	LIM and senescent cell antigen-like-containing domain protein 3-like	6.57892	5.36435
ASHGA5P010947	0.0311991	0.0810984	2.3206	up	protein_coding	NM_001012507	CCDS34529.1	CENPW	RefSeq	567	chr6	+	126661252	126669754	TGACTTATTGGTCCATCTGAACTGTTTACTGTTTGTTCATCGATTAGCAGAAGAGTCCAG	387103	centromere protein W	5.79271	4.57822
ASHGA5P052569	0.000106001	0.0029704	2.32052	up	protein_coding	NM_207582	CCDS4519.1	ERVFRD-1	RefSeq	3318	chr6	-	11102721	11112071	TTAGGTCACCATGGGCCTGCTCCTGCTGGTTCTCATTCTCACGCCTTCACTAGCAGCCTA	405754	HERV-FRD_6p24.1 provirus ancestral Env polyprotein preproprotein	5.92581	4.71136
ASHGA5P049278	0.00661212	0.0320347	2.3192	up	protein_coding	NM_022914	CCDS10842.1	ACD	RefSeq	2086	chr16	-	67691414	67694718	ATCGTGATGGTTCTGCCTTCCAGTATGAGTATGAGCCACCCTGCACGTCCCTCTGTGCTC	65057	adrenocortical dysplasia protein homolog isoform 2	8.04885	6.83522
ASHGA5P008241	0.0283679	0.0770741	2.31918	up	protein_coding	NM_003684	CCDS538.1	MKNK1	RefSeq	2827	chr1	-	47023078	47069966	AGGGAAACAAGAACATTTTGGAGCTGATTGAGTTCTTTGAAGATGACACAAGGTTTTACT	8569	MAP kinase-interacting serine/threonine-protein kinase 1 isoform 1	5.59886	4.38525
ASHGA5P011801	0.0131986	0.0490179	2.31805	up	protein_coding	NM_001166422	CCDS55452.1	HDAC8	RefSeq	1033	chrX	-	71787431	71792953	ATGCAAAGAAAGAGACGTGTGTGTATGTGGCACTTTACAAGGCATTCTGAAGAAATCCAA	55869	histone deacetylase 8 isoform 5	5.86127	4.64835
ASHGA5P001487	0.0400728	0.0931375	2.31778	up	protein_coding	NM_016047	CCDS1707.1	SF3B14	RefSeq	783	chr2	-	24290453	24299314	AAATCAGAGTGGGGAACACACCTGAAACTAGAGGAACAGCTTATGTGGTCTATGAGGACA	51639	pre-mRNA branch site protein p14	7.21429	6.00155
ASHGA5P007617	0.0253366	0.0724605	2.3167	up	protein_coding	NM_014659	CCDS32215.1	PPIP5K1	RefSeq	5564	chr15	-	43825659	43877090	CACCGAGATGGGTTTGAAGGGTGTTCCATGGTGCCTACCATCTACCCTCTGGAAACACTG	9677	inositol hexakisphosphate and diphosphoinositol-pentakisphosphate kinase 1 isoform 2	6.10914	4.89707
ASHGA5P039680	0.00158348	0.0143005	2.31647	up	protein_coding	NM_001012967	CCDS47161.1	DDX60L	RefSeq	6754	chr4	-	169277885	169401638	TATCCCATTGCCCAAAATAAAAAGACTCCTTGCATCCAGTGTTCCTGAGCTGAGAGGACA	91351	probable ATP-dependent RNA helicase DDX60-like	7.40555	6.19362
ASHGA5P001207	0.0233136	0.0692004	2.31483	up	protein_coding	NM_003910	CCDS5663.1	BUD31	RefSeq	1060	chr7	+	99006600	99017239	AGCAAGCTGGAAGTGGGCCGCATCATCGAGTGCACACACTGTGGCTGTCGTGGCTGCTCT	8896	protein BUD31 homolog	6.77421	5.5633
ASHGA5P032788	0.0127008	0.0478842	2.31436	up	protein_coding	NM_001160246	CCDS54079.1	RPAIN	RefSeq	1362	chr17	+	5322960	5336340	ATACTTGGGCTGTGATCCTCTAGAGCCAGCTTGGACTCACATCATTCTATGGGGTTGAAG	84268	RPA-interacting protein isoform d	9.58178	8.37117
ASHGA5P049155	0.0139657	0.0507559	2.31434	up	protein_coding	NM_000760	CCDS413.1	CSF3R	RefSeq	3419	chr1	-	36931643	36948915	GAGCTTCTAGGGCTTCCTGGGGTTCCCTTCTTGGGCCTGCCTCTTAAAGGCCTGAGCTAG	1441	granulocyte colony-stimulating factor receptor isoform a precursor	6.25122	5.04062
ASHGA5P012340	1.08547e-05	0.000737181	2.31427	up	protein_coding	NM_153280	CCDS14275.1	UBA1	RefSeq	3544	chrX	+	47050198	47074527	GGCACAGGGGATGTCCAGCTCGCCGCTGTCCAAGAAACGTCGCGTGTCCGGGCCTGATCC	7317	ubiquitin-like modifier-activating enzyme 1	5.29179	4.08124
ASHGA5P022757	0.0168735	0.0568608	2.31418	up	protein_coding	NM_001193622		PINLYP	RefSeq	598	chr19	+	44084695	44086256	GTGCAGGCTGGTATTTTCAAACCCAGATTTGCTATGCGGGGCTGTGCTACAGAGAGTATG	390940	uncharacterized protein ENSP00000244321 isoform 2	4.86142	3.65091
ASHGA5P035331	0.000244303	0.0049576	2.31341	up	protein_coding	NM_005915	CCDS2179.1	MCM6	RefSeq	3791	chr2	-	136597195	136634047	AGAGATCCCTCTTGCCAAGGATTTTTATGTTGCATTCCAAGACCTGCCTACCAGACACAA	4175	DNA replication licensing factor MCM6	4.39804	3.18802
ASHGA5P033351	0.000839035	0.00997345	2.31197	up	protein_coding	NM_032646	CCDS32717.1	TTYH2	RefSeq	3468	chr17	+	72209695	72258157	GGCCTGCGCCTGCAGCCCGTGAACAGCACCTTCAGCCCCGGCGACGAGAGTTACCAGGAG	94015	protein tweety homolog 2 isoform 1	6.99572	5.7866
ASHGA5P006901	0.0341748	0.0852891	2.31177	up	protein_coding	NM_152773	CCDS33929.1	TCTEX1D2	RefSeq	695	chr3	-	196018089	196045165	TAGTGATTGGAGAACAAAGAGGTGAAGGAGTATTCATGGCTTCTCGCTGTTTCTGGGATG	255758	tctex1 domain-containing protein 2	6.18505	4.97606
ASHGA5P011077	0.00279285	0.0196507	2.31108	up	protein_coding	NM_181873	CCDS942.1	MTMR11	RefSeq	2368	chr1	-	149900542	149908266	ATTCTCAAAGGCCAATCCCATCCCTTCTGGATAACCAGATGTTAAATCATGAGATCAGAG	10903	myotubularin-related protein 11 isoform b	9.63249	8.42392
ASHGA5P044205	0.0406286	0.0938299	2.30997	up	protein_coding	NM_001102560	CCDS47843.1	PPAPDC1B	RefSeq	776	chr8	-	38124497	38126738	TATGCTTGTTTTCACATCATTGAATTTAACCTAGAAAGCTAGTAGGGATGGGAAAATCTG	84513	phosphatidate phosphatase PPAPDC1B isoform 3	6.29926	5.09139
ASHGA5P000784	2.70868e-05	0.00135763	2.30995	up	protein_coding	NM_001031850	CCDS33038.1	PSG6	RefSeq	1728	chr19	-	43406233	43422076	ATCCATGATAGTCAAAGTCTCTGGTCCCTGCCATGGAAACCAGACAGAGTCTCATTAATG	5675	pregnancy-specific beta-1-glycoprotein 6 isoform b precursor	4.56573	3.35787
ASHGA5P015688	0.0195109	0.0617907	2.30977	up	protein_coding	NM_032483	CCDS47842.1	PPAPDC1B	RefSeq	880	chr8	-	38122257	38126738	CACTGGCAAGGACCCTTTAAATGGTGAAAATGGGCAGATGAATAGCAATAAGTGGACCTT	84513	phosphatidate phosphatase PPAPDC1B isoform 2	5.84969	4.64194
ASHGA5P000762	0.0345379	0.0856677	2.3096	up	protein_coding	ENST00000175091	CCDS1696.1	LAPTM4A	GENCODE	1765	chr2	-	20232410	20251789	AATATCTGGATCAACTACCTGATTTTCCCTACAAAGATGACCTCCTGGCCTTGGACTCCA	9741	lysosomal protein transmembrane 4 alpha [Source:HGNC Symbol;Acc:6924]	5.53092	4.32327
ASHGA5P011273	0.00768979	0.034878	2.30835	up	protein_coding	NM_003828	CCDS14695.1	MTMR1	RefSeq	2732	chrX	+	149861868	149933575	TGATGGGCGAGAAATATGTAATCCCCTGGCTGACTAGGACTGTTAAACATAGTGTGGACT	8776	myotubularin-related protein 1	6.42393	5.21707
ASHGA5P008393	0.0467208	0.101677	2.30796	up	protein_coding	NM_177542	CCDS54281.1	SNRPD2	RefSeq	882	chr19	-	46190711	46195443	CCTTCGATAGGCACTGCAACATGGTGCTGGAGAACGTGAAGGAGATGTGGACTGAGGTAC	6633	small nuclear ribonucleoprotein Sm D2 isoform 2	7.65922	6.45261
ASHGA5P046465	0.000558394	0.00817293	2.30698	up	protein_coding	NM_000444	CCDS14204.1	PHEX	RefSeq	2861	chrX	+	22050920	22266478	GAATTGCCCTGGTCGTGTTTGTCGGTGGCACCCTAGTTCTGGGCACGATCCTCTTTCTAG	5251	phosphate-regulating neutral endopeptidase	8.26797	7.06197
ASHGA5P002985	0.0378654	0.0902731	2.30604	up	protein_coding	NM_006433	CCDS1984.1	GNLY	RefSeq	751	chr2	+	85921413	85925875	GGCAACCCAGGTCTGGTCTTCTCTCGTCTGAGCCCTGAGTACTACGACCTGGCAAGAGCC	10578	granulysin isoform NKG5 precursor	7.85865	6.65323
ASHGA5P005725	0.0382593	0.0907233	2.30575	up	protein_coding	NM_173060	CCDS4082.1	CAST	RefSeq	4304	chr5	+	96038492	96110385	TCCACGCAGAGTGTCAGCTTCCTCTGGTGCAACCAGCAAGTCTTCCAGTATGAATCCCAC	831	calpastatin isoform b	5.28277	4.07753
ASHGA5P001256	0.00714721	0.0334198	2.30496	up	protein_coding	NM_017748	CCDS45663.1	CWC25	RefSeq	2347	chr17	-	36957445	36981589	AGTTCATCCACCGCATGAAGCTGGAGAGTGCATCTACTTCCTCCCTGGAGGATCGGGTGA	54883	pre-mRNA-splicing factor CWC25 homolog	5.05636	3.85162
ASHGA5P015305	0.0192255	0.0612414	2.30256	up	protein_coding	NM_001137608	CCDS46990.1	ZNF732	RefSeq	2193	chr4	-	264463	289944	TACATGAGACAGTAGCCAAACACCCAGCTGTGTGTTCTCATTTCACCCAAGACTTTTTGC	654254	zinc finger protein 732	4.55669	3.35345
ASHGA5P048991	0.00144155	0.0134817	2.30218	up	protein_coding	NM_001135255	CCDS44105.1	RBBP4	RefSeq	7940	chr1	+	33116748	33151812	AAGGACAAGGGTCCTAGATATGTCTTTACTTGTTGTGATTTTAGACTCCCCTTTTTTCTT	5928	histone-binding protein RBBP4 isoform b	4.36097	3.15798
ASHGA5P012496	0.0410205	0.0943926	2.30193	up	protein_coding	NM_002074	CCDS34.1	GNB1	RefSeq	3180	chr1	-	1716724	1822526	ACGCCAGTAGCATGTGGATGCCATGGAGACTGGAAGACCATTCCAACTTGGACGCGTTAC	2782	guanine nucleotide-binding protein G(I)/G(S)/G(T) subunit beta-1	6.76425	5.56141
ASHGA5P037715	0.000106865	0.0029704	2.30116	up	protein_coding	NM_001207020		SHISA8	RefSeq	1405	chr22	-	42305557	42310671	TCCTCCCGGCCTCCGGCTCGCGCTCGCGCTTCGGCTCGCGTTGCTGCTGGCGCGGCCGCC	440829	putative protein shisa-8 precursor	5.82082	4.61846
ASHGA5P038262	7.53962e-06	0.00062444	2.30112	up	protein_coding	NM_003280	CCDS2857.1	TNNC1	RefSeq	705	chr3	-	52485106	52488057	AGTTCATGAAGGGTGTGGAGTAGATGCTGACCTTCACCCAGAGCTGCCTATGCCCAGCCT	7134	"troponin C, slow skeletal and cardiac muscles"	4.31246	3.11013
ASHGA5P006178	1.89644e-06	0.000257587	2.29927	up	protein_coding	NM_001042507	CCDS42565.1	LGALS7B	RefSeq	506	chr19	+	39279849	39282394	TGAGAATTCGCGGCTTGGTTCCTCCCAATGCCAGCAGGTTCCATGTAAACCTGCTGTGCG	653499	galectin-7	4.27438	3.07321
ASHGA5P013849	0.0178808	0.0587787	2.29854	up	protein_coding	ENST00000397126	CCDS54240.1	ZNF208	GENCODE	9088	chr19	-	22148896	22193745	GAATCCCCAGTTATATGTTCTCATTTTGCTCAAGATCTTTGGCCAGAGCAGGGCATAGAA	7757	zinc finger protein 208 [Source:HGNC Symbol;Acc:12999]	6.94594	5.74522
ASHGA5P054228	0.0357466	0.0873761	2.29819	up	protein_coding	ENST00000382832	CCDS14793.1	CYorf15B	GENCODE	3315	chrY	+	21758441	21767698	CAGGATCTCCTCTAGGCATTGATTAAGATTAAGTGTGATCATTGTACTGATGGATATATT		Putative gamma-taxilin-like protein CYorf15B [Source:UniProtKB/Swiss-Prot;Acc:Q9BZA4]	5.82876	4.62826
ASHGA5P047836	0.00940257	0.0395965	2.29787	up	protein_coding	ENST00000332314	CCDS44520.1	MRGPRG	GENCODE	870	chr11	-	3239173	3240043	TGCCCTCGGTCTTCTACTGGAGCCTGCAGCCCCTGCTGAACTTCCTGCTGCCCGTGTTTT	386746	"MAS-related GPR, member G [Source:HGNC Symbol;Acc:24829]"	9.40737	8.20707
ASHGA5P008323	0.000179643	0.00406672	2.29747	up	protein_coding	NM_020344	CCDS6493.1	SLC24A2	RefSeq	10857	chr9	-	19507449	19787017	TGACCCACTCGCCGAAGAACTTGGATCATATGGAAAACTAAAATATTATGACACAATGAC	25769	sodium/potassium/calcium exchanger 2 isoform 1	4.70686	3.50681
ASHGA5P010709	0.0277425	0.0761962	2.29667	up	protein_coding	NM_013349	CCDS1505.1	NENF	RefSeq	995	chr1	+	212606228	212619721	CGGGGAGGAGGAAGATCAGCCCATCTACTTGGCAGTGAAGGGAGTGGTGTTTGATGTCAC	29937	neudesin precursor	4.82113	3.62159
ASHGA5P008006	0.0272309	0.0754872	2.29423	up	protein_coding	NM_002659	CCDS12628.1	PLAUR	RefSeq	1570	chr19	-	44152722	44174498	CTGCAACACCACCAAATGCAACGAGGGCCCAATCCTGGAGCTTGAAAATCTGCCGCAGAA	5329	urokinase plasminogen activator surface receptor isoform 1 precursor	5.14792	3.94991
ASHGA5P017444	0.0097835	0.0404976	2.29298	up	protein_coding	NM_001135670	CCDS47798.1	MSRA	RefSeq	1372	chr8	+	9911829	10286401	AGAACAGTCGAACCTTTCCCAGAGGGAACACAGATGGCTGTATTTGAAAAAACTGGCCAT	4482	mitochondrial peptide methionine sulfoxide reductase isoform b	4.43163	3.23441
ASHGA5P012595	0.00164006	0.0145407	2.29283	up	protein_coding	NM_001007072	CCDS32315.1	ZSCAN2	RefSeq	951	chr15	+	85144248	85159841	CAGGACAGTGAAACAGCTTCCTGCGTACATGGCTGCCCTGTGTGATTCCAGTTGCAGCCT	54993	zinc finger and SCAN domain-containing protein 2 isoform 3	4.66787	3.47074
ASHGA5P054972	0.00235338	0.0177986	2.29271	up	protein_coding	NM_006442	CCDS8123.1	DRAP1	RefSeq	1022	chr11	+	65686727	65689048	GGCGAGAGAGGCCCCGAGATGCCGAGCAAGAAGAAGAAGTACAACGCGCGGTTCCCGCCG	10589	dr1-associated corepressor	4.98525	3.7882
ASHGA5P010665	5.5221e-07	0.000119689	2.29219	up	protein_coding	NM_053052	CCDS1562.1	SNAP47	RefSeq	2388	chr1	+	227922696	227968932	ATACCCAGGAACTAACCCAGATCCTGAGGAGGATGAAGGGGCTGGCCCTGGAGGCCGAGA	116841	synaptosomal-associated protein 47	4.26802	3.07129
ASHGA5P056034	0.00584848	0.029819	2.29084	up	protein_coding	NM_145116	CCDS9773.1	MAX	RefSeq	575	chr14	-	65544520	65569227	ATATTGACGACCTCAAGCGGCAGAATGCTCTTCTGGAGCAGCAAGGTGAGCACCCGAGCT	4149	protein max isoform e	7.62415	6.42827
ASHGA5P010116	2.20209e-05	0.00119961	2.28954	up	protein_coding	NM_002661	CCDS42204.1	PLCG2	RefSeq	4289	chr16	+	81812898	81991899	TGAAATCAATCCGTCCATGCCTCAGAGAACCGTGAAAGCTCTGTATGACTACAAAGCCAA	5336	"1-phosphatidylinositol 4,5-bisphosphate phosphodiesterase gamma-2"	3.98334	2.78829
ASHGA5P013448	0.029403	0.0784523	2.28856	up	protein_coding	ENST00000393845	CCDS54624.1	WDR52	GENCODE	10259	chr3	-	113005776	113160361	TTGGTCAACAGGATCAAAGAACTGGTTGTCACTTTCGATGCAGAACTCCGTCTCCTTAGA	55779	WD repeat domain 52 [Source:HGNC Symbol;Acc:25631]	5.31783	4.1234
ASHGA5P003658	0.0227692	0.0683009	2.28821	up	protein_coding	NM_015488	CCDS2411.1	PNKD	RefSeq	3129	chr2	+	219135114	219211516	AAGAACCCCATGAAAGCTGTGGGACTGGCCTGGTACAGCCTGTACACCCGCACCTGGCTC	25953	probable hydrolase PNKD isoform 1 precursor	7.31472	6.1205
ASHGA5P003995	0.0299613	0.0792769	2.2867	up	protein_coding	NM_006464	CCDS46351.1	TGOLN2	RefSeq	6373	chr2	-	85545140	85555419	GGACCAGAAGTCCTAACAGAATGGTATATTCCTCTGGAAAAAGATGAACGTCACCAATGG	10618	trans-Golgi network integral membrane protein 2 isoform 1 precursor	5.44585	4.25258
ASHGA5P049176	0.000907784	0.0103673	2.28622	up	protein_coding	NM_001142777	CCDS45466.1	HSD3B7	RefSeq	2233	chr16	+	30996518	31000473	TCTTCCCCAGCCAGGCATGGCCGACTCTGCACAGGCCCAGAAGCTGGTGTACCTGGTCAC	80270	3 beta-hydroxysteroid dehydrogenase type 7 isoform b	4.2107	3.01774
ASHGA5P052270	0.00545356	0.02886	2.2847	up	protein_coding	NM_198828	CCDS47224.1	MAST4	RefSeq	1137	chr5	+	65892175	66282351	GGAGAACATCACCCCTTGGATGAATTGCCACCACATTAAATAAAACATATCCAAAGCTCA	375449	microtubule-associated serine/threonine-protein kinase 4 isoform b	10.3866	9.19455
ASHGA5P054878	0.00138479	0.0131593	2.284	up	protein_coding	NM_001079808	CCDS31575.1	PGA4	RefSeq	1395	chr11	+	60989820	60999179	CCTGTTCCCTGTCCTACCAATAACGTAGAATAAAAACATAACCCACTGAAACAGGTTTTG	643847	pepsin A preproprotein	8.16341	6.97184
ASHGA5P009284	6.78172e-05	0.00232611	2.28266	up	protein_coding	NM_176867	CCDS34043.1	PPA2	RefSeq	1184	chr4	-	106290233	106395227	CTGAGGAGCGCGGCCAGCCCTGCTCGCAGAATTACCGCCTCTTCTTTAATATTGATGATG	27068	"inorganic pyrophosphatase 2, mitochondrial isoform 4 precursor"	4.78924	3.59852
ASHGA5P001231	0.0278603	0.0763554	2.28086	up	protein_coding	ENST00000223428	CCDS35074.1	ZNF510	GENCODE	5154	chr9	-	99518146	99540328	AGTCACCCAAAAGATTACAGAGGTGATGACCTGATCAAGCAGAACAAGAAAATCAAAGAC	22869	zinc finger protein 510 [Source:HGNC Symbol;Acc:29161]	5.01868	3.82911
ASHGA5P043213	2.23345e-05	0.00121022	2.27876	up	protein_coding	NM_014891	CCDS5662.1	PDAP1	RefSeq	2707	chr7	-	98992297	99006305	AAACGAATGCAGTCACTCTCCCTGAATAAGTAACTGCGACCCGTGGGAGGAGATGCCGGG	11333	28 kDa heat- and acid-stable phosphoprotein	4.38076	3.19251
ASHGA5P013748	0.00351553	0.0224954	2.27827	up	protein_coding	NM_145698	CCDS44368.1	ACBD5	RefSeq	3993	chr10	-	27484142	27529808	TGCTCTTCCTCTCGTTTCATGCAGGCTCTTGGGAAAGCTGGTGCTGCTGCTGCCTGATTC	91452	acyl-CoA-binding domain-containing protein 5 isoform 1	7.86376	6.67582
ASHGA5P055755	0.00064473	0.00880855	2.27316	up	protein_coding	NM_016183	CCDS191.1	MRTO4	RefSeq	2273	chr1	+	19578074	19586622	GCACCGTCTTCCGCCGCACGTGGATTCAGCGCGATGCCCAAATCCAAGCGCGACAAGAAA	51154	mRNA turnover protein 4 homolog	5.57391	4.38921
ASHGA5P036523	0.00115297	0.011912	2.27268	up	protein_coding	ENST00000539719	CCDS377.1	ZNF362	GENCODE	3106	chr1	+	33722173	33766320	AAGCCCTACAAGTGTCCCAACTGCTACCGGGCCTATTCGGACTCCGCTTCTTTGCAGATC	149076	zinc finger protein 362 [Source:HGNC Symbol;Acc:18079]	4.66859	3.48419
ASHGA5P019141	0.000136559	0.00343489	2.27233	up	protein_coding	NM_024628	CCDS43143.1	SLC12A8	RefSeq	3510	chr3	-	124801479	124931609	CCAGGAGCAGAGCAGTCTCCCTGTCCAGATCACCAGGATCCCTGCTTGCTGGAGAATGAC	84561	solute carrier family 12 member 8	4.82315	3.63897
ASHGA5P054058	0.0330267	0.0838175	2.27206	up	protein_coding	NM_000169	CCDS14484.1	GLA	RefSeq	1418	chrX	-	100652778	100663001	CTAGAAAATACAATGCAGATGTCATTAAAAGACTTACTTTAAAATGTTTATTTTATTGCC	2717	alpha-galactosidase A precursor	4.65099	3.46699
ASHGA5P023154	2.00887e-05	0.0011539	2.27087	up	protein_coding	NM_001166349	CCDS11771.2	SLC26A11	RefSeq	2730	chr17	+	78194199	78227308	CGCCGAGTGGCCCCACCGTAGAGATGCCTTCTTCGGTGACGGCGCTGGGTCAGGCCAGGT	284129	sodium-independent sulfate anion transporter	4.14308	2.95983
ASHGA5P007243	1.54224e-05	0.000963855	2.26933	up	protein_coding	NM_001037666	CCDS43001.1	GATSL3	RefSeq	1644	chr22	-	30681106	30685616	ATATCTCCATTGTCATGGATGCTGAAACACAGAAAAAGTTCCCCAGTGACCTCCTGCTGA	652968	GATS-like protein 3	4.23513	3.05287
ASHGA5P013338	3.23e-09	4.317e-06	2.2686	up	protein_coding	NM_001142281	CCDS44749.1	ARCN1	RefSeq	3768	chr11	+	118443101	118473747	CCTCACCATGATCCCTGAATATTGCCGAGCCTTAGAAGAGAATGAAATATCTGAGCACTG	372	coatomer subunit delta isoform 2	4.52828	3.34648
ASHGA5P004242	1.01213e-05	0.0007062	2.26846	up	protein_coding	NM_001128840	CCDS46848.1	CACNA1D	RefSeq	7711	chr3	+	53529030	53846492	CTCAGCGAAGCAGACCCAACTGAAAGTGAAAATGTCCCTGTCCCAACTGCTACACCTGGG	776	voltage-dependent L-type calcium channel subunit alpha-1D isoform b	5.06252	3.88081
ASHGA5P055482	0.0002654	0.00513638	2.26699	up	protein_coding	ENST00000311966	CCDS8921.1	GLS2	GENCODE	2623	chr12	-	56864735	56882181	TTGTGCTCCTGACCCAGGCATTCCGAAAGAAGTTTGTCATTCCTGATTTTGAGGAGTTCA	27165	"glutaminase 2 (liver, mitochondrial) [Source:HGNC Symbol;Acc:29570]"	5.17566	3.99488
ASHGA5P038740	0.000312051	0.00567654	2.2654	up	protein_coding	ENST00000383763	CCDS43060.1	TRIM71	GENCODE	3138	chr3	+	32859509	32933771	AATGGCTTCGTTCCCCGAGACCGATTTCCAGATCTGCTTGCTGTGCAAGGAGATGTGCGG	131405	"tripartite motif containing 71, E3 ubiquitin protein ligase [Source:HGNC Symbol;Acc:32669]"	4.89585	3.71608
ASHGA5P004738	0.000598895	0.00850701	2.26224	up	protein_coding	ENST00000296585	CCDS3957.1	ITGA2	GENCODE	7869	chr5	+	52285155	52390609	AAACTTGTTTTTTGCATCATTCTCCCTGCCGGTTGATGGGACAGAAGTAACATGCCAGGT	3673	"integrin, alpha 2 (CD49B, alpha 2 subunit of VLA-2 receptor) [Source:HGNC Symbol;Acc:6137]"	4.85834	3.68059
ASHGA5P013560	0.000488813	0.00752696	2.2614	up	protein_coding	NM_003031	CCDS10735.1	SIAH1	RefSeq	2003	chr16	-	48394453	48419229	CCGCCCACAGAAATGAGCCGTCAGACTGCTACAGCATTACCTACCGGTACCTCGAAGTGT	6477	E3 ubiquitin-protein ligase SIAH1 isoform a	5.00484	3.82763
ASHGA5P050811	0.0294035	0.0784523	2.26105	up	protein_coding	NM_015680	CCDS2433.1	CNPPD1	RefSeq	2100	chr2	-	220036618	220041702	TAATGTCTCCAGCTGCCTGGAAGGCAGCATGGGGCTGCGGTCACTCTGGGGCAGTCTTCT	27013	protein CNPPD1	5.6672	4.4902
ASHGA5P003436	0.0452036	0.0997809	2.26036	up	protein_coding	NM_005849	CCDS10599.1	IGSF6	RefSeq	1062	chr16	-	21652604	21663987	CTCACAAAAGAAGAAGAGTGCTCGGCGTATTTTTCAGGAAATTGCTCAAGAACTATACCA	10261	immunoglobulin superfamily member 6 precursor	6.84274	5.66618
ASHGA5P008400	0.000153598	0.0036903	2.25944	up	protein_coding	NM_017525	CCDS31601.1	CDC42BPG	RefSeq	4945	chr11	-	64591661	64612041	ATGGACACCTCCAACTTTGATGTGGATGACGACACCCTCAACCATCCAGGGACCCTGCCA	55561	serine/threonine-protein kinase MRCK gamma	4.89067	3.7147
ASHGA5P009030	0.0164693	0.0559801	2.25836	up	protein_coding	NM_004834		MAP4K4	RefSeq	7334	chr2	+	102314164	102511152	ACACATGTAAGAAAGAACCCACACTCTATGATCCAGTGTAGCATCAAACCCCATGCAATC	9448	mitogen-activated protein kinase kinase kinase kinase 4 isoform 1	6.21148	5.0362
ASHGA5P013339	0.00420714	0.0251663	2.25797	up	protein_coding	ENST00000392863	CCDS34496.1	C6orf162	GENCODE	2434	chr6	+	88032305	88052043	GAAGAAAAAGATAATAAATCATCATTGATCAAGATGTCTTCAGCACCTGAGCCTCCAACA	57150	chromosome 6 open reading frame 162 [Source:HGNC Symbol;Acc:21401]	6.16874	4.99371
ASHGA5P053974	0.0412638	0.0947632	2.25757	up	protein_coding	NM_006579	CCDS14300.1	EBP	RefSeq	1191	chrX	+	48380163	48387104	TCATGCCCAGAGCACGCTGGATGCCAAGGCCACAAAAGCCAAGAGCAAGAAGAACTGAGG	10682	"3-beta-hydroxysteroid-Delta(8), Delta(7)-isomerase"	5.41796	4.24319
ASHGA5P012131	0.000115366	0.00306051	2.25614	up	protein_coding	NM_021221	CCDS34400.1	LY6G5B	RefSeq	774	chr6	+	31638727	31640227	GTAGGAAAGGTTCCTGTTCCCGACATCCGGACGTGCCACTTCTGCCTCGTAGAAGACCCT	58496	lymphocyte antigen 6 complex locus protein G5b precursor	4.93937	3.76551
ASHGA5P006957	0.0206764	0.0642362	2.25544	up	protein_coding	NM_024339	CCDS10491.1	THOC6	RefSeq	1444	chr16	+	3074031	3077756	ACGTCACCTTCTACCAGGACCTGATTCTGTCAGCTGGCCAGGGCCGCTGCGTCAACCAGT	79228	THO complex subunit 6 homolog isoform 1	4.58917	3.41575
ASHGA5P043066	0.000221209	0.00462722	2.25434	up	protein_coding	NM_015198	CCDS34637.1	COBL	RefSeq	5326	chr7	-	51083908	51384515	ATGCCGCACTCTCTGCTCAGGGCTCGGAAAGTCCTCTGCTAGAAGACCTTGGTCTTCTGT	23242	protein cordon-bleu	5.15752	3.98481
ASHGA5P011357	0.0471181	0.102169	2.25426	up	protein_coding	NM_004768	CCDS647.1	SRSF11	RefSeq	2811	chr1	+	70671364	70717701	TCTAGAAGTGCAAGCAGAGAGAGACGACGACGAAGAAGCAGGAGTGGCACAAGATCTCCT	9295	serine/arginine-rich splicing factor 11 isoform 1	5.15	3.97734
ASHGA5P043901	0.000145579	0.00358216	2.25338	up	protein_coding	NM_001130720	CCDS47706.1	AHCYL2	RefSeq	5072	chr7	+	128864854	129070052	GGCGAGGCCCTGGTCAGCCCCGACGGCACCGTCACCGAGGCGCCGCGCACAGTCAAGAAG	23382	putative adenosylhomocysteinase 3 isoform b	8.07787	6.90578
ASHGA5P053384	0.000158857	0.00379878	2.25334	up	protein_coding	NM_032410	CCDS6139.1	HOOK3	RefSeq	14460	chr8	+	42752032	42885682	CCACAGCAAGGTAGAGAAGTTGTGCCGCTCAATCACAGACACCTGCACCCACAACATACT	84376	protein Hook homolog 3	7.14412	5.97206
ASHGA5P002786	5.31719e-06	0.000514011	2.25129	up	protein_coding	NM_021149	CCDS10947.1	COTL1	RefSeq	1850	chr16	-	84599203	84651669	CCGTCATCTGGGTGACTTTTAAATATGACGGCTCCACCATCGTCCCCGGCGAGCAGGGAG	23406	coactosin-like protein	5.05607	3.88532
ASHGA5P034651	0.0397717	0.0926702	2.25048	up	protein_coding	NM_001145641	CCDS46095.1	SRRM5	RefSeq	2415	chr19	+	44116252	44118650	GATAGGGGGAAAGGAAAGACCTGTGATGATTCAATAAATTTTTACATAGCACCCATCCCC	100170229	serine/arginine repetitive matrix protein 5	6.75302	5.58279
ASHGA5P012046	0.00104286	0.0111754	2.24986	up	protein_coding	NM_006929	CCDS4731.1	SKIV2L	RefSeq	4187	chr6	+	31926580	31937532	TTTGCACCAAAAGATTGTCCAACTCCAGCTCCTGGACTACTAAGCCTTAGCTGTATGTTG	6499	helicase SKI2W	4.73699	3.56715
ASHGA5P001862	0.0453599	0.0999744	2.24914	up	protein_coding	NM_144581	CCDS9739.1	C14orf149	RefSeq	1381	chr14	-	59939405	59951073	AGCTGTGAGGGAAGCGAAATGTGGTGATTTTAAAGCTGTTATAGTGGAAGTATCAGGACA	112849	probable proline racemase	5.78322	4.61385
ASHGA5P036974	0.0171976	0.0574281	2.24816	up	protein_coding	NM_018474		PLK1S1	RefSeq	2329	chr20	+	21106623	21227258	CGTGTCCAAGCTCATGTTGTACACTTCACCACAAATACAGAGAAGCTTCAAAAACTGAAG	55857	centrosomal protein kizuna isoform 1	4.97163	3.80288
ASHGA5P002158	1.47449e-05	0.000927201	2.24748	up	protein_coding	NM_032865	CCDS11368.1	TNS4	RefSeq	4090	chr17	-	38632079	38657854	ATCTAAATACTGGTTTAAGCCAAACATCACCCGAGAGCAAGCAATCGAGCTGCTGAGGAA	84951	tensin-4 precursor	4.03697	2.86866
ASHGA5P001392	0.0146852	0.0521597	2.24745	up	protein_coding	ENST00000373479	CCDS4834.1	RNF8	GENCODE	5631	chr6	+	37321747	37362514	TACTTCATTGAGGCTGTCACCTTGAACTGTGCCCACAGTTTCTGCTCCTACTGTATCAAT	9025	"ring finger protein 8, E3 ubiquitin protein ligase [Source:HGNC Symbol;Acc:10071]"	4.21856	3.05027
ASHGA5P001936	0.00116833	0.0119923	2.2474	up	protein_coding	NM_014548	CCDS10144.1	TMOD2	RefSeq	9186	chr15	+	52043757	52108558	CAACATTAAGAACATTCCAATTCCAACCCTGAGGGAATTTGCAAAGGCTCTGGAGACCAA	29767	tropomodulin-2 isoform a	6.64619	5.47793
ASHGA5P037003	0.000556865	0.00817293	2.24656	up	protein_coding	NM_153324	CCDS13180.1	DEFB123	RefSeq	397	chr20	+	30028410	30038060	CCATGAAGCTCCTTTTGCTGACTTTGACTGTGCTGCTGCTCTTATCCCAGCTGACTCCAG	245936	beta-defensin 123 precursor	5.52773	4.36001
ASHGA5P035363	0.000393056	0.00657086	2.24381	up	protein_coding	NM_012097	CCDS2195.1	ARL5A	RefSeq	3169	chr2	-	152657479	152685009	GGGGTCCGCTGCCCGAGAATGGGAATTCTCTTCACTAGAATATGGAGACTGTTCAATCAC	26225	ADP-ribosylation factor-like protein 5A isoform 1	5.39574	4.22979
ASHGA5P014400	7.11901e-05	0.00235459	2.2429	up	protein_coding	NM_018051	CCDS47757.1	WDR60	RefSeq	3789	chr7	+	158649268	158738883	AGAAAGAAAGCTGCAGTACGGAGACAGCAAGGACAACCCTCTCAAGTACTGGCTTTATAA	55112	WD repeat-containing protein 60	4.10976	2.9444
ASHGA5P006861	0.0317939	0.0820792	2.24176	up	protein_coding	NM_173206	CCDS32825.1	PIAS2	RefSeq	4573	chr18	-	44395672	44497495	GTCATCAGATTTGCCAGGAGAACAAAGAAGAAATGATATTAATAATGAACTGAAGCTTGG	9063	E3 SUMO-protein ligase PIAS2 isoform alpha	6.45183	5.2872
ASHGA5P005129	0.000814111	0.00975688	2.23989	up	protein_coding	ENST00000301607	CCDS11737.1	EVPL	GENCODE	6587	chr17	-	74002926	74023507	AGCCAGCAGGCTCCATCTGGCTCAGACCTGGCCAACCCACAGGCCCAGAAGCTCCTGACA	2125	envoplakin [Source:HGNC Symbol;Acc:3503]	4.71451	3.55109
ASHGA5P012157	0.00160662	0.0144454	2.23933	up	protein_coding	ENST00000376093	CCDS54984.1	LST1	GENCODE	648	chr6	+	31554976	31556686	GAGGAGCTGGCACCTTCTGTCCTGGTCCCAGGCCCAGGGCTCCTCAGAGCAGGAACTCCA	7940	leukocyte specific transcript 1 [Source:HGNC Symbol;Acc:14189]	6.35469	5.19162
ASHGA5P042292	0.00422222	0.0251973	2.23761	up	protein_coding	NM_003545	CCDS4593.1	HIST1H4E	RefSeq	377	chr6	+	26204872	26205249	GCTACCGCTTAAACGACTCAGCATCTCGACTTCCCAAATCAAAGGCCCTTTTCAGGGCCG	8367	histone H4	5.11221	3.95026
ASHGA5P001618	5.01524e-05	0.0019726	2.23536	up	protein_coding	ENST00000239032	CCDS7606.1	PRLHR	GENCODE	1980	chr10	-	120352915	120355160	CCACTCCCAGGTGGCCATGGCCTCATCGACCACTCGGGGCCCCAGGGTTTCTGACTTATT	2834	prolactin releasing hormone receptor [Source:HGNC Symbol;Acc:4464]	4.22714	3.06663
ASHGA5P006599	0.031504	0.0816018	2.23482	up	protein_coding	NM_018048	CCDS8628.1	MAGOHB	RefSeq	3034	chr12	-	10756363	10766208	TGGCCGACAGGAGCTTGAAATTGTAATTGGAGATGAGCACATATCTTTTACCACATCAAA	55110	protein mago nashi homolog 2	5.55593	4.39578
ASHGA5P011362	5.26521e-05	0.00200267	2.23389	up	protein_coding	NM_001193334	CCDS53331.1	WLS	RefSeq	2482	chr1	-	68591040	68698229	GGCTTGATTGGAGAAAATGCAGAAGTCTCCATGGACGTTTCCCTGGCTTACCGTGATGAC	79971	protein wntless homolog isoform 3	4.26634	3.10678
ASHGA5P050407	0.00113235	0.0117947	2.23143	up	protein_coding	NM_001031693	CCDS30752.1	HHLA3	RefSeq	818	chr1	+	70820492	70833705	AAACCACAGCCTCCGTTGGATATGTTCGGTGCATGTTATAAACAACCACTTAAACCCTCC	11147	HERV-H LTR-associating protein 3 isoform 1	4.75281	3.59483
ASHGA5P013941	0.0156487	0.0541855	2.23102	up	protein_coding	NM_001100814	CCDS41911.1	TMEM55B	RefSeq	1730	chr14	-	20926011	20929637	CCGCCCCAGGCATTTCCCCCGTTTCCCGAGGGGCATCCAGCCGTGTTGCCTGGGGAGGAC	90809	transmembrane protein 55B isoform 1	6.21522	5.05752
ASHGA5P018783	0.000870864	0.0100812	2.23024	up	protein_coding	NM_139135	CCDS44091.1	ARID1A	RefSeq	7934	chr1	+	27022521	27108601	TGTATCAACAGCAACAGCAGGTATCCAGCCCTGCTCCCCTGCCCCGGCCAATGGAGAACC	8289	AT-rich interactive domain-containing protein 1A isoform b	11.4407	10.2835
ASHGA5P001140	0.00127854	0.0126452	2.22936	up	protein_coding	ENST00000221671	CCDS12345.1	C19orf44	GENCODE	3346	chr19	+	16607204	16632163	ATCATGTTATCAGTGCAGATGCAATAGAAGCCCTGACCGCTTACAGCCCGGCCGTGCTGG	84167	chromosome 19 open reading frame 44 [Source:HGNC Symbol;Acc:26141]	4.72128	3.56464
ASHGA5P004600	0.0249443	0.0720668	2.22914	up	protein_coding	NM_001035505	CCDS33224.1	BOLA3	RefSeq	465	chr2	-	74362527	74375039	GACATTTCAGGCACTAAAAGAAGAAATCAAAGAGATGCATGGATTGCGGATATTTACCTC	388962	bolA-like protein 3 isoform 2	6.43039	5.2739
ASHGA5P005927	0.0327365	0.0834342	2.22878	up	protein_coding	NM_001003803	CCDS32075.1	ATP5S	RefSeq	1859	chr14	+	50779046	50792946	CATCATTGCTTTGCGTCATTTAAGAAACCTCAAATATTTGTTGTTAAGTGATCTTCCTGG	27109	"ATP synthase subunit s, mitochondrial isoform a precursor"	6.23273	5.07648
ASHGA5P030609	0.0128382	0.0482237	2.22877	up	protein_coding	NM_001143936	CCDS45289.1	C15orf61	RefSeq	1313	chr15	+	67813521	67819641	CCTGGCAGGACCTGGCCCGGCAGAACCGCTTCTTCACGGCGCTCAAGGTCGTCAACCTCG	145853	uncharacterized protein C15orf61 precursor	5.99117	4.83492
ASHGA5P027361	0.0373326	0.0894839	2.22768	up	protein_coding	NM_001113202	CCDS31837.1	NACA	RefSeq	1061	chr12	-	57106210	57119326	TATCCCAGCAAGCACAACTAGCAGCTGCTGAGAAATTCAAAGTTCAAGGTGAAGCTGTCT	4666	nascent polypeptide-associated complex subunit alpha isoform b	8.14223	6.98669
ASHGA5P002721	2.28101e-05	0.00122298	2.22578	up	protein_coding	NM_005124	CCDS4541.1	NUP153	RefSeq	5687	chr6	-	17615268	17706818	GGAAGTGTTCTAGATATTCTGAAAAGCCCTGGTTTCGCATCGCCGAAGATAGATTCTGTT	9972	nuclear pore complex protein Nup153	4.32247	3.16816
ASHGA5P037485	0.000166745	0.0039139	2.22444	up	protein_coding	NM_001384	CCDS504.1	DPH2	RefSeq	2513	chr1	+	44435652	44439043	TCTGGTAGCTTCTTCCAGCCTATACTGGCACCATGTGAGCTGGAAGCTGCCTGCAACCCT	1802	diphthamide biosynthesis protein 2 isoform a	6.02183	4.86838
ASHGA5P008437	0.00101877	0.0110173	2.22337	up	protein_coding	NM_001912	CCDS6675.1	CTSL1	RefSeq	1730	chr9	+	90340973	90346384	GTGGACACAGGTTTTAAAACATGAATCCTACACTCATCCTTGCTGCCTTTTGCCTGGGAA	1514	cathepsin L1 isoform 1 preproprotein	4.42809	3.27534
ASHGA5P053009	1.32118e-06	0.000203922	2.22107	up	protein_coding	NM_018951	CCDS5410.2	HOXA10	RefSeq	2648	chr7	-	27210209	27213955	ATGTTTTGCACAAGAAATGTCAGCCAGAAAGGGCTATCTGCTCCCTTCGCCAAATTATCC	3206	homeobox protein Hox-A10	4.14465	2.9934
ASHGA5P018393	0.0323837	0.082971	2.22063	up	protein_coding	NM_001130107	CCDS45168.1	KLC1	RefSeq	2530	chr14	+	104095524	104167888	AGAACCCCGGGGCGTCTCTGGCCGAGCCTCTTTTTGTGGAAAACGACAGCAGCAGCAGTG	3831	kinesin light chain 1 isoform 3	4.9778	3.82683
ASHGA5P003135	0.0486936	0.10397	2.21923	up	protein_coding	NM_018317	CCDS3439.1	TBC1D19	RefSeq	2204	chr4	+	26585545	26756918	TGCAGCTGAAGCAGTTCTTGCTGACCTTTCTACTTTAAAAGTTATGCCTCTTCTTCAGAT	55296	TBC1 domain family member 19	4.72305	3.573
ASHGA5P003727	2.46812e-05	0.00128279	2.21906	up	protein_coding	NM_014901	CCDS4404.1	RNF44	RefSeq	4153	chr5	-	175953699	175964421	TCTGGGGAAGCCCTGGCCTCGAGGGCCCCCTGGCCAGCCCGCCTGCCCGGGATGAGCGCT	22838	RING finger protein 44	6.92854	5.77858
ASHGA5P002947	0.00343511	0.0221899	2.21902	up	protein_coding	NM_020143	CCDS1885.1	PNO1	RefSeq	1994	chr2	+	68385004	68403094	TGGCTGATGTGAAAGTTCACATCCTTGGCTCCTTCCAAAATATCAAGATGGCAAGAACTG	56902	RNA-binding protein PNO1	9.11413	7.96421
ASHGA5P019886	0.0458752	0.100588	2.21773	up	protein_coding	NM_003135	CCDS4108.1	SRP19	RefSeq	1502	chr5	+	112196884	112204089	TTCCCATCACGTAAGTCAGTAATGTTGTATGCAGCAGAAATGATACCTAAACTAAAAACA	6728	signal recognition particle 19 kDa protein isoform 1	5.87199	4.72291
ASHGA5P009927	1.03598e-05	0.000717926	2.21721	up	protein_coding	NM_007250	CCDS14373.1	KLF8	RefSeq	5434	chrX	+	56258821	56314322	AAAGCTCTCACCTGAAAGCTCACCGCAGAATCCATACAGGAGAGAAGCCTTATAAATGCA	11279	Krueppel-like factor 8 isoform 1	4.28324	3.13449
ASHGA5P049762	0.0298678	0.0791526	2.2169	up	protein_coding	NM_004375	CCDS11583.1	COX11	RefSeq	2427	chr17	-	53038566	53046064	CAGGAGAGACTGCACTGGCGTTTTACAGAGCTAAGAATCCTACTGACAAACCAGTAATTG	1353	"cytochrome c oxidase assembly protein COX11, mitochondrial isoform 1"	4.81342	3.66488
ASHGA5P012111	0.044249	0.0984936	2.21529	up	protein_coding	NM_001288	CCDS4719.1	CLIC1	RefSeq	1265	chr6	-	31698357	31704341	AACAAGATTGAGGAATTTCTGGAGGCAGTGCTGTGCCCTCCCAGGTACCCCAAGCTGGCA	1192	chloride intracellular channel protein 1	6.34165	5.19416
ASHGA5P055017	6.88129e-05	0.00233666	2.21511	up	protein_coding	NM_001567	CCDS8213.1	INPPL1	RefSeq	4726	chr11	+	71935881	71950188	AAGAACAGCTTCAATAACCCTGCCTACTACGTCCTTGAAGGGGTCCCGCACCAGCTGCTG	3636	"phosphatidylinositol 3,4,5-trisphosphate 5-phosphatase 2"	5.10906	3.96168
ASHGA5P005290	0.000651939	0.00880855	2.21423	up	protein_coding	NM_152868	CCDS13971.1	KCNJ4	RefSeq	2075	chr22	-	38822332	38851205	CCGCCCAGCGGCCCTGCGTCTTCCCAGGTGACCACGCCGGCTTCAGGACATGCACGGACA	3761	inward rectifier potassium channel 4	5.15251	4.00571
ASHGA5P043981	0.00075857	0.00948166	2.21392	up	protein_coding	ENST00000409703	CCDS47735.2	FAM115C	GENCODE	4885	chr7	+	143412938	143427173	TGGGTCATCCAGCCTTGGGTAGAGAAGGAATTTGAACTCAGGAAATTCAACTCCAGAACT	285966	"family with sequence similarity 115, member C [Source:HGNC Symbol;Acc:26878]"	5.13701	3.99041
ASHGA5P017848	0.00107647	0.0113519	2.21357	up	protein_coding	NM_033293	CCDS53704.1	CASP1	RefSeq	1112	chr11	-	104896236	104905884	TTATCCGTTCCATGGGTGAAGCTCCTCAGGCAGTGCAGGACAACCCAGCTATGCCCACAT	834	caspase-1 isoform gamma	7.56286	6.41648
ASHGA5P001998	0.0384837	0.0908746	2.21152	up	protein_coding	NM_020234	CCDS10132.1	DTWD1	RefSeq	2750	chr15	+	49913225	49937333	CGACTTCAAGGGTTGTTACAAGTTGAGTTGAAAACAAGAAAAACTTGCTTTTGGCGCCAT	56986	DTW domain-containing protein 1	6.27299	5.12796
ASHGA5P045431	0.0136385	0.0499192	2.20831	up	protein_coding	NM_001080497	CCDS48010.1	MEGF9	RefSeq	6227	chr9	-	123363195	123476765	ATTATGGCTTTAGTAAGAATGGCTGCTTGCCCTGCCAATGCAATAATCGGTCTGCCAGTT	1955	multiple epidermal growth factor-like domains protein 9 precursor	5.92284	4.7799
ASHGA5P007578	0.00590072	0.0299803	2.20812	up	protein_coding	NM_030808	CCDS11143.1	NDEL1	RefSeq	2407	chr17	+	8339169	8371495	AAAGTTCTCTCGATCAGGGCATACATCTTTCTTCGACAAAGGGGCAGTAAACGGCTTTGA	81565	nuclear distribution protein nudE-like 1 isoform B	4.61376	3.47094
ASHGA5P003353	0.000541479	0.00801751	2.20802	up	protein_coding	NM_052845	CCDS9131.1	MMAB	RefSeq	4154	chr12	-	109991520	110011358	ACCACTCACGGCCTTCATCCTGCCTTCGGGAGGCAAGATCAGCTCGGCGCTGCATTTCTG	326625	"cob(I)yrinic acid a,c-diamide adenosyltransferase, mitochondrial precursor"	4.6912	3.54845
ASHGA5P005167	0.0319326	0.0822046	2.20331	up	protein_coding	NM_001024843	CCDS46712.1	TNRC6B	RefSeq	15976	chr22	+	40440820	40731812	TCCACCTCCTGGTGAAGAAAGCAAACAAGAGAAGGAGCAAGAAAGGGAAGAACAGTTAAT	23112	trinucleotide repeat-containing gene 6B protein isoform 3	4.86528	3.72561
ASHGA5P036262	0.00047509	0.00745722	2.20263	up	protein_coding	NM_021192	CCDS2265.1	HOXD11	RefSeq	1463	chr2	+	176972083	176974316	GTCTGACTTCGCTAGCAAGCCTTCGTTCCTTTCCCAACCGTCGTCCTGCCAGATGACTTT	3237	homeobox protein Hox-D11	5.54932	4.41009
ASHGA5P031088	0.000108014	0.0029704	2.20169	up	protein_coding	NM_023931	CCDS10682.1	ZNF747	RefSeq	2392	chr16	-	30542778	30546194	GGCCCCGGGGCCGGGCAGGCGGCCTCCTCGCAGCGTGGGGTTTGCGTTCTTCTCCCCCAG	65988	KRAB domain-containing protein ZNF747	5.03131	3.8927
ASHGA5P037356	0.000381763	0.00647092	2.20032	up	protein_coding	NM_198691	CCDS42954.1	KRTAP10-1	RefSeq	1011	chr21	-	45959067	45960078	TATGTGCCCACCTGCTCTGAGGATTCCTCTTCATGCTGCCAGCAGTCTAGCTGCCATCCA	386677	keratin-associated protein 10-1	6.56553	5.42781
ASHGA5P013304	0.0134359	0.04943	2.19987	up	protein_coding	NM_003387	CCDS2260.1	WIPF1	RefSeq	4600	chr2	-	175424301	175499307	AACAATACAGATTTATCAGCAAGACTGTTGAACGCATAACTGCCCAAGATGCCTGTCCCT	7456	WAS/WASL-interacting protein family member 1	6.59141	5.45399
ASHGA5P043325	8.04481e-06	0.000645295	2.19937	up	protein_coding	NM_001135914		KCP	RefSeq	4733	chr7	-	128516918	128550773	TCTGTGATGCCCTGGAAGCCTACGCCAGTCACTGTCGCCAGGCAGGAGTGACACCTACCT	375616	kielin/chordin-like protein isoform 1 precursor	4.28179	3.1447
ASHGA5P027653	0.00935766	0.0395218	2.19849	up	protein_coding	NM_177551	CCDS9235.1	HCAR2	RefSeq	2082	chr12	-	123185839	123187904	TTTGCTTTTAACATTAAAAGGGAAATGTGCCTCTGCCCCACAGTTAGAGGGGTGCACGTT	338442	hydroxycarboxylic acid receptor 2	7.76004	6.62353
ASHGA5P048662	0.0291851	0.0782537	2.19743	up	protein_coding	NM_003825	CCDS10087.1	SNAP23	RefSeq	2650	chr15	+	42787503	42825259	GACAAATGGTCAGCTTCAGCAACCAACAACGGGAGCAGCCAGTGGTGGATACATTAAACG	8773	synaptosomal-associated protein 23 isoform SNAP23A	4.79333	3.65751
ASHGA5P055987	0.0340304	0.0851136	2.19689	up	protein_coding	NM_015684	CCDS45102.1	ATP5S	RefSeq	1359	chr14	+	50779046	50789743	GATCACATGGGTAACTACCCTATCGTTTTGCTAATAGAAAATGCAGATGATTTGCAGTGA	27109	"ATP synthase subunit s, mitochondrial isoform c precursor"	5.24435	4.10889
ASHGA5P000656	0.00163244	0.0145248	2.19587	up	protein_coding	NM_198794		MAP4K5	RefSeq	4435	chr14	-	50885210	50999376	TGACTTTGAGCCCCATGCAATCATTCGTCATACCATTAGATCTACAAACAGGAATGCCAG	11183	mitogen-activated protein kinase kinase kinase kinase 5	8.64326	7.50847
ASHGA5P008145	0.00264974	0.0190493	2.19521	up	protein_coding	NM_001001503	CCDS33573.1	NDUFV3	RefSeq	1056	chr21	+	44313377	44329773	TCCACCAAAAAAGCCAGCCCCAGTGCCTGCTGAGCCGTTTGACAACACTACCTACAAGAA	4731	"NADH dehydrogenase [ubiquinone] flavoprotein 3, mitochondrial isoform b precursor"	8.11646	6.9821
ASHGA5P020856	0.00524718	0.028342	2.19495	up	protein_coding	NM_018434	CCDS4451.1	RNF130	RefSeq	1865	chr5	-	179382473	179499109	GCAGTAACAAAAGAATGGTTTATTATTGCCAGTTTTGGCCTCCTCAGTGCCCTCACACTC	55819	E3 ubiquitin-protein ligase RNF130 precursor	8.5401	7.40592
ASHGA5P027004	2.20672e-06	0.000284555	2.19433	up	protein_coding	NM_001135734	CCDS44817.1	ZNF384	RefSeq	3251	chr12	-	6775642	6798738	TATCCACTCGGGGGCCAAGCCCTACAACTGTTCCTACTGCCAGAAGGCCTTCCGCCAGCT	171017	zinc finger protein 384 isoform d	3.95905	2.82526
ASHGA5P003646	0.0228814	0.0684159	2.19289	up	protein_coding	NM_032977	CCDS2340.1	CASP10	RefSeq	5906	chr2	+	202047620	202086383	TCTGCTAACACTCTAAACTCTGAAACCAGCACAAAGAGGGCAGCTGTGTACAGGATGAAT	843	caspase-10 isoform 1 preproprotein	5.63181	4.49897
ASHGA5P008293	0.00257628	0.0188133	2.19206	up	protein_coding	NM_199203	CCDS13424.1	TMEM189-UBE2V1	RefSeq	2925	chr20	-	48697660	48770335	ATCACCACAGGAGTAAAAGTCCCTCGCAATTTCCGACTGTTGGAAGAACTCGAAGAAGGC	387522	TMEM189-UBE2V1 fusion protein	5.33614	4.20385
ASHGA5P002109	6.94593e-05	0.00233708	2.1914	up	protein_coding	NM_005629	CCDS14726.1	SLC6A8	RefSeq	3580	chrX	+	152953751	152962048	AAGAACGGCGGAGGTGTGTTCCTTATTCCCTACGTCCTGATCGCCCTGGTTGGAGGAATC	6535	sodium- and chloride-dependent creatine transporter 1 isoform 1	4.7701	3.63825
ASHGA5P034196	0.00527388	0.0284259	2.19094	up	protein_coding	ENST00000326282	CCDS12539.1	EID2B	GENCODE	1865	chr19	-	40021629	40023494	AAATCTCTCTTGTTGCTGTCCTTTGCCAAACTCAGAACTATTCCATGCAGGTGCCATTGC	126272	EP300 interacting inhibitor of differentiation 2B [Source:HGNC Symbol;Acc:26796]	6.59566	5.4641
ASHGA5P004715	6.23472e-06	0.00056207	2.19051	up	protein_coding	NM_001947	CCDS33766.2	DUSP7	RefSeq	3248	chr3	-	52082936	52090461	TTCTTCCCTGAGGCCATCAGCTTCATTGACGAAGCCCGCTCCAAGAAGTGTGGTGTCCTG	1849	dual specificity protein phosphatase 7	4.0881	2.95683
ASHGA5P035744	0.00790591	0.0355036	2.18995	up	protein_coding	NM_004040	CCDS1699.1	RHOB	RefSeq	2384	chr2	+	20646834	20649201	ATGTGAAATTTTCTCTGCACCTCTGTACAGAGAATACACCTGCCCCTGTATATCCTTTTT	388	rho-related GTP-binding protein RhoB precursor	7.09602	5.96512
ASHGA5P013839	0.00123616	0.0124705	2.18995	up	protein_coding	NM_080599	CCDS7086.1	UPF2	RefSeq	5387	chr10	-	11962020	12085169	GGCCGCGCTGATTGTCCTGGGTCACATAATGCCAGCTGAGCGTAAAAAGCCAGCAAGTAT	26019	regulator of nonsense transcripts 2	5.10366	3.97276
ASHGA5P039303	0.0477321	0.102815	2.18921	up	protein_coding	NM_024511	CCDS33941.1	HAUS3	RefSeq	5620	chr4	-	2230095	2243860	GTGGACATGCTTTGTGATACTTTGTATCAAGGAGGAAATCAGCTTTTGCTTAGTGATCAG	79441	HAUS augmin-like complex subunit 3	6.29143	5.16102
ASHGA5P054064	0.0327695	0.0834976	2.1888	up	protein_coding	NM_177947	CCDS14489.1	ARMCX3	RefSeq	3367	chrX	+	100878119	100882831	CCAAAGAGCCAGGAATAACACCTTGATTTTGTAATTTAGAAGCAACACACATTGTAAACT	51566	armadillo repeat-containing X-linked protein 3	5.16783	4.03769
ASHGA5P041494	0.00104941	0.0112059	2.18879	up	protein_coding	NM_020452	CCDS1066.1	ATP8B2	RefSeq	5872	chr1	+	154300275	154323780	ACAAAAACTTTGCTTTCACCATGGTCCACTTCTGGTTTGGCTTCTTCTGTGGCTTCTCAG	57198	probable phospholipid-transporting ATPase ID isoform a	4.35047	3.22034
ASHGA5P049062	0.0104454	0.0422084	2.18863	up	protein_coding	NM_003498	CCDS10549.1	SNN	RefSeq	3307	chr16	+	11762288	11773015	AGAAAGGCCAAGCTGATGACTCCCAACGGCCCGGAAGTCCACGGCTGAGCCAGGATGCAA	8303	stannin	4.61095	3.48092
ASHGA5P052876	0.00212571	0.0168387	2.18764	up	protein_coding	NM_001030060	CCDS34548.1	SAMD5	RefSeq	6324	chr6	+	147829827	147891157	TTCCCGGTCCCACCATGTGCACCAACATAGTTTACGAGTGGCTCAAAGCGCTGCAGCTTC	389432	sterile alpha motif domain-containing protein 5	5.2233	4.09392
ASHGA5P009153	0.000187956	0.00417147	2.18708	up	protein_coding	NM_181651	CCDS8070.1	PRDX5	RefSeq	781	chr11	+	64085559	64089295	TTCACCCCTGGATGTTCCAAGGTTCGGCTCCTGGCTGATCCCACTGGGGCCTTTGGGAAG	25824	"peroxiredoxin-5, mitochondrial isoform b"	6.41596	5.28695
ASHGA5P001495	0.000764224	0.00952895	2.18703	up	protein_coding	NM_001146158	CCDS54370.1	MOGS	RefSeq	2584	chr2	-	74688183	74692537	CTCCTCACCGGACTGATGTGGGCGCAGCAGGGCACCACCCCGGGGACTCCTAAGCTCAGG	7841	mannosyl-oligosaccharide glucosidase isoform 2	5.39584	4.26687
ASHGA5P027779	0.0331338	0.0839379	2.18697	up	protein_coding	NM_004038	CCDS30782.1	AMY1A	RefSeq	1862	chr1	-	104230039	104238912	TTTCCTTTCTTAGCTTACGTTATCTACCAGAGCACCGTGGGCTGTTACTTGCCTTGAGTT	276	alpha-amylase 1 precursor	8.11381	6.98488
ASHGA5P038144	0.0221028	0.0668928	2.18639	up	protein_coding	NM_001134432	CCDS46782.1	AZI2	RefSeq	1460	chr3	-	28373179	28390618	TTCCCTCTTCGCATAAGAATAGAAGTAGCCATCAGAGTTCATATACTTTTTCAACCCTTT	64343	5-azacytidine-induced protein 2 isoform b	6.51895	5.3904
ASHGA5P000683	0.0434531	0.0976754	2.18632	up	protein_coding	NM_001017408	CCDS34523.1	GOPC	RefSeq	4616	chr6	-	117881432	117923705	CTGACTCTGGTACCATTAAGGCAAAATTGGAAAGAGAGCTTGAGGCAAACAAAAAAGAAA	57120	Golgi-associated PDZ and coiled-coil motif-containing protein isoform b	5.14867	4.02016
ASHGA5P051289	3.0564e-05	0.00141525	2.18489	up	protein_coding	NM_001003684	CCDS46681.1	UQCR10	RefSeq	993	chr22	+	30163357	30166402	GGTGAGGGCCTGTGCCATCCCTGACCTTGGACCCGCCTGAGGGGTGACAGTGGAGTAGAG	29796	cytochrome b-c1 complex subunit 9 isoform b	8.25675	7.12919
ASHGA5P017417	0.00229049	0.0175967	2.18481	up	protein_coding	NM_001128613	CCDS44640.1	NUDT22	RefSeq	1050	chr11	+	63993737	63997488	TGAGCCTCAGGTGAACCTGCCGCTGCTCACCCTGAGCCAGCCCCTGCTGTTGGGCATCGC	84304	nucleoside diphosphate-linked moiety X motif 22 isoform b	6.80312	5.67561
ASHGA5P015579	8.493e-05	0.00262793	2.18359	up	protein_coding	NM_001145544	CCDS46215.1	ZSCAN18	RefSeq	2250	chr19	-	58595208	58609730	AGGGTAGACGGGATGCTGCTGGGCTCCCCTGCGGGCTCATCCTCAATTCTTAGCGATGGA	65982	zinc finger and SCAN domain-containing protein 18 isoform 2	6.00432	4.87762
ASHGA5P049371	0.0192537	0.0613121	2.18201	up	protein_coding	NM_000485	CCDS32511.1	APRT	RefSeq	807	chr16	-	88875876	88878342	CTTAAGGGCAGGGAGAAGCTGGCACCTGTACCCTTCTTCTCTCTCCTGCAGTATGAGTGA	353	adenine phosphoribosyltransferase isoform a	9.73569	8.61003
ASHGA5P006693	0.000341386	0.0060064	2.17985	up	protein_coding	NM_004255	CCDS10273.1	COX5A	RefSeq	784	chr15	-	75212616	75230495	AACCGCATGGATGGGCTTCCCCAAGGATTTATTGACATTGCTACTTGAGTGTGAACAGTT	9377	"cytochrome c oxidase subunit 5A, mitochondrial precursor"	8.99323	7.86901
ASHGA5P011863	0.000252319	0.00500149	2.17867	up	protein_coding	ENST00000373960	CCDS33383.1	DES	GENCODE	2248	chr2	+	220283098	220291461	AACTTCCGAGAAACCAGCCCTGAGCAAAGGGGTTCTGAGGTCCATACCAAGAAGACGGTG	1674	desmin [Source:HGNC Symbol;Acc:2770]	5.94647	4.82302
ASHGA5P049125	0.000189271	0.00418286	2.17643	up	protein_coding	NM_019116	CCDS10613.2	UBFD1	RefSeq	4931	chr16	+	23568861	23585710	CAGCTCGCCTCTTCCCAGCGGCCTCTGCGGGAGCGGTGGGTGTTGTACACAATCATCATG	56061	ubiquitin domain-containing protein UBFD1	4.70417	3.58221
ASHGA5P016576	0.0333807	0.0841705	2.17449	up	protein_coding	ENST00000431837	CCDS44862.1	IRAK4	GENCODE	4147	chr12	+	44152746	44183346	CATTAAGAAGGTTCAACAGCTGCTGCAAGAGATGACAGCTTCTTAAAACTTTATTGGAAA	51135	interleukin-1 receptor-associated kinase 4 [Source:HGNC Symbol;Acc:17967]	4.59659	3.47591
ASHGA5P013236	0.000760851	0.00949852	2.17427	up	protein_coding	NM_014217	CCDS31024.1	KCNK2	RefSeq	3274	chr1	+	215256559	215410436	TGAATAAGAATGGCGGCACCTGACTTGCTGGATCCTAAATCTGCCGCTCAGAACTCCAAA	3776	potassium channel subfamily K member 2 isoform b	4.10816	2.98763
ASHGA5P049128	0.0262031	0.0738076	2.17357	up	protein_coding	NM_032626	CCDS45444.1	RBBP6	RefSeq	1780	chr16	+	24550907	24560722	GATGGCAACTACAAAAGCAGTATGTAAAAACACAATCTCACACTTTTTCTACACATTGCT	5930	E3 ubiquitin-protein ligase RBBP6 isoform 3	5.02518	3.90511
ASHGA5P055311	0.00464855	0.0265144	2.17306	up	protein_coding	NM_175054	CCDS8665.1	HIST4H4	RefSeq	412	chr12	-	14923653	14924065	GGGTCGCACCCTTTATGGTTTCGGCGGTTGAGCTGTCCCCACAGCTTCTCTACAGACTCC	121504	histone H4	6.94807	5.82834
ASHGA5P021666	0.00104297	0.0111754	2.17258	up	protein_coding	NM_001161585	CCDS55300.1	C9orf11	RefSeq	962	chr9	-	27284653	27297137	TTGCTCTAAAAAACGGATCAACCCCAAACGTGCCTGCATTTTGGACAATGTTAGCTAAAG	54586	acrosome formation-associated factor isoform 2 precursor	4.16357	3.04416
ASHGA5P055089	0.0294744	0.0785804	2.17174	up	protein_coding	NM_182533	CCDS38.2	C1orf86	RefSeq	745	chr1	-	2120987	2126214	TTGGCCGAAAGCACAGAAGACGTGACGTGGTGAGCGCCATCCAAGAGCCCTGCGCAGAGT	199990	uncharacterized protein C1orf86 isoform 2	6.36867	5.24983
ASHGA5P052656	0.01858	0.0600872	2.1709	up	protein_coding	ENST00000376072	CCDS47402.1	NCR3	GENCODE	875	chr6	-	31557050	31560762	GTGATTCCAGAGCCCAGATGTCCCTAGTCCTCTTCAAAAGACCCCAATAAATCTGCCCCA	259197	natural cytotoxicity triggering receptor 3 [Source:HGNC Symbol;Acc:19077]	8.05674	6.93845
ASHGA5P002701	0.000684445	0.00898511	2.17078	up	protein_coding	NM_012279	CCDS4409.1	ZNF346	RefSeq	3089	chr5	+	176449696	176493745	CTCAGATCAGAAGAGCAGCAGAAGCAAAGACAAGAACCAGTGCTGCCCCATCTGTAACAT	23567	zinc finger protein 346	4.474	3.35579
ASHGA5P005229	0.019304	0.0614148	2.16948	up	protein_coding	NM_005054	CCDS2082.1	RGPD5	RefSeq	7182	chr2	-	113125964	113191107	GTTGCTCAAGATGAGGAAGAAAATCCTTCCCGTTCTTCTGGATGAGCATCCTATCTTCGT	84220	RANBP2-like and GRIP domain-containing protein 5/6 isoform 1	5.55543	4.43809
ASHGA5P053806	0.0101821	0.0414236	2.16797	up	protein_coding	NM_001099679	CCDS6817.1	TRIM32	RefSeq	3731	chr9	+	119449580	119463579	ATATTCCACCCCATAGGGGATGAGAAATTATCAGTTTCTTCTGCTCCCAAGCCAACTTCC	22954	E3 ubiquitin-protein ligase TRIM32	6.92081	5.80447
ASHGA5P049469	0.0394129	0.0921716	2.16794	up	protein_coding	NM_015343	CCDS11093.1	CTDNEP1	RefSeq	1780	chr17	-	7146905	7155259	TGATGTTCGTTCCGTGCTGAGCCGAAACCTTCACCAACATCGGCTCTGGTGACAGCTGCT	23399	CTD nuclear envelope phosphatase 1	5.05409	3.93777
ASHGA5P001330	0.0328086	0.0835343	2.16771	up	protein_coding	NM_005127	CCDS8605.1	CLEC2B	RefSeq	2052	chr12	-	10004967	10022458	AGAAGAAATGAATTTTCTTAGGCGGTATAAATGCAGTTCTGATCACTGGATTGGACTGAA	9976	C-type lectin domain family 2 member B	7.7003	6.58413
ASHGA5P028496	0.0293741	0.0784413	2.1669	up	protein_coding	NM_145203	CCDS9363.1	CSNK1A1L	RefSeq	2405	chr13	-	37677396	37679801	CCGTAAACACCCATATGATCTGGGATTTTGTTCATATTTTGAAATGGGAGCTTTTATGTT	122011	casein kinase I isoform alpha-like	4.79301	3.67738
ASHGA5P041926	0.00865097	0.037576	2.1663	up	protein_coding	ENST00000255039	CCDS1148.1	HAPLN2	GENCODE	1771	chr1	+	156589085	156595517	TTCGGCTTCCCCAGGCCCCAACAGGCAGCCTATGGGACCTACTGCTACGCCGAGAATTAG	60484	hyaluronan and proteoglycan link protein 2 [Source:HGNC Symbol;Acc:17410]	6.34451	5.22927
ASHGA5P052579	0.0458554	0.100566	2.16492	up	protein_coding	NM_003472	CCDS34344.1	DEK	RefSeq	2879	chr6	-	18224399	18264799	AAGTAGAGAGGTTGACAATGCAAGTCTCTTCCTTACAGAGAGAGCCATTTACAATTGCAC	7913	protein DEK isoform 1	5.24947	4.13516
ASHGA5P034768	6.2151e-05	0.00220603	2.16431	up	protein_coding	ENST00000376819	CCDS128.1	ANGPTL7	GENCODE	2238	chr1	+	11249397	11256038	AAACCCACAAAAGATGCTGAAAAAGCCTCTCTCAGCTGTGACCTGGCTCTGCATTTTCAT	10218	angiopoietin-like 7 [Source:HGNC Symbol;Acc:24078]	4.24736	3.13345
ASHGA5P018941	0.0326046	0.0833691	2.16378	up	protein_coding	NM_198333	CCDS14442.1	P2RY10	RefSeq	1679	chrX	+	78200828	78217438	AAGCTCCAGGGAACCATAAATCCATGGCTAACCTTGACAAATACACTGAAACATTCAAGA	27334	putative P2Y purinoceptor 10	4.41394	3.30039
ASHGA5P001453	0.0364725	0.0881725	2.16343	up	protein_coding	NM_014367	CCDS43139.1	FAM162A	RefSeq	838	chr3	+	122103022	122128961	GGGCAAGAAGGCTGCCCAAAGACACGAGACTTTAACAAGCTTGAACTTAGAAAAGAAAGC	26355	protein FAM162A	6.47005	5.35673
ASHGA5P009923	0.00454161	0.0263021	2.16266	up	protein_coding	NM_032121	CCDS14436.2	MAGT1	RefSeq	4035	chrX	-	77081861	77151065	AAGAATCCCCACACGGGACATGTGAATTATATCCATGGAAGCAGTCAAGCCCAGTTTGTA	84061	magnesium transporter protein 1	5.2369	4.12409
ASHGA5P009243	0.0242162	0.0708927	2.16264	up	protein_coding	NM_176805	CCDS10343.1	MRPS11	RefSeq	1402	chr15	+	89010683	89021861	CCAAGTTCAGCACACAGATCCAGGTAGTCTCTGCTAGTAATGAGCCCCTTGCCTTTGCTT	64963	"28S ribosomal protein S11, mitochondrial isoform b"	6.50688	5.39409
ASHGA5P003337	0.00229794	0.0176273	2.16235	up	protein_coding	NM_005810	CCDS8599.1	KLRG1	RefSeq	1815	chr12	+	9142220	9163340	AAGCCCAGAATGACTATGGACCACAGCAAAAATCTTCCTCTTCCAGGCCTTCTTGTTCTT	10219	killer cell lectin-like receptor subfamily G member 1	4.48034	3.36774
ASHGA5P014467	0.000130486	0.00332316	2.16126	up	protein_coding	NM_001171603	CCDS33190.1	PREPL	RefSeq	6318	chr2	-	44544747	44589001	GCGGCTCTGGCCCCAAAAGGAGCATAAACCAGGGACTTTGATATCATGCAGCAGAAGACC	9581	prolyl endopeptidase-like isoform 1	5.88523	4.77335
ASHGA5P002421	0.0144972	0.0517639	2.15984	up	protein_coding	NM_025250	CCDS34588.1	TTYH3	RefSeq	4838	chr7	+	2671602	2704436	TCTACGACTGGTACAGGTGGCTGGGCTACCTGGGCCTGCTGCTGCTGGACGTCATCATCT	80727	protein tweety homolog 3	7.11159	6.00067
ASHGA5P003897	0.00196489	0.0161418	2.15978	up	protein_coding	NM_004927	CCDS8096.1	MRPL49	RefSeq	2119	chr11	+	64889715	64894841	ACGGCTGTTGAGCCAGACCCAGGGCCCTCCAGATTACCCCAGGTTTGTGGAGTCTGTGGA	740	"39S ribosomal protein L49, mitochondrial"	4.86731	3.75642
ASHGA5P053776	0.0114486	0.0448565	2.15955	up	protein_coding	NM_000035	CCDS6756.1	ALDOB	RefSeq	2426	chr9	-	104182841	104198062	TCAATGCTATCAACCTTTGCCCTCTACCAAAGCCCTGGAAACTAAGTTTCTCTTATGGAC	229	fructose-bisphosphate aldolase B	5.56533	4.4546
ASHGA5P012260	0.0135253	0.0496683	2.15877	up	protein_coding	NM_001127603	CCDS47981.1	NMRK1	RefSeq	1147	chr9	-	77676115	77703133	TTAATTATAATACAAGGGTCTATCAGCCTCCAGACTCTCCGGGATACTTTGATGGCCATG	54981	nicotinamide riboside kinase 1 isoform 2	3.97849	2.86828
ASHGA5P000922	0.0416854	0.095277	2.15826	up	protein_coding	NM_006739	CCDS13915.1	MCM5	RefSeq	2568	chr22	+	35796115	35820495	AAGGACTTCACCAAGCAGAAATACCCGGAGCACGCCATCCACAAGGTGCTGCAGCTCATG	4174	DNA replication licensing factor MCM5	5.75265	4.64278
ASHGA5P000931	0.000773037	0.00956856	2.15721	up	protein_coding	NM_012473	CCDS13928.1	TXN2	RefSeq	1342	chr22	-	36863092	36877687	GCATCCCTCCGCTCGCATTGCAGGGAGATGGCTCAGCGACTTCTTCTGAGGAGGTTCCTG	25828	"thioredoxin, mitochondrial precursor"	5.16988	4.06071
ASHGA5P053795	0.0326183	0.0833834	2.15685	up	protein_coding	ENST00000367364	CCDS44291.1	PTPRC	GENCODE	1017	chr1	+	198608226	198662335	ATGTATTTGTGGCTTAAACTCTTGGCATTTGGCTTTGCCTTTCTGGACACAGAAGTATTT	5788	"protein tyrosine phosphatase, receptor type, C [Source:HGNC Symbol;Acc:9666]"	6.12662	5.0177
ASHGA5P006067	0.040862	0.0942194	2.15676	up	protein_coding	NM_001122631	CCDS44519.1	CDKN1C	RefSeq	1771	chr11	-	2904447	2906995	GGTGAGCCAAAGCCCAAAGAGCCCCGAGGGAACCTGCCGGGGCAGCGGACGTTGGAAGGG	1028	cyclin-dependent kinase inhibitor 1C isoform b	4.33305	3.22419
ASHGA5P018662	0.000267231	0.00513638	2.15676	up	protein_coding	NM_004178	CCDS41791.1	TARBP2	RefSeq	1448	chr12	+	53894704	53900215	TGTAGTTTTCTCGCGATCCAAAAGGCTCCGTGCCCAAAGCAAATGCTGGCCGCCAACCCA	6895	RISC-loading complex subunit TARBP2 isoform b	3.93826	2.8294
ASHGA5P001348	4.48289e-05	0.00183402	2.15595	up	protein_coding	NM_030640	CCDS8650.1	DUSP16	RefSeq	6312	chr12	-	12626215	12715448	CTGCTTGCAGGTGGGTTTGCTGAGTTCTCTCGTTGTTTCCCTGGCCTCTGTGAAGGAAAA	80824	dual specificity protein phosphatase 16	4.59318	3.48485
ASHGA5P052928	0.0374405	0.0896356	2.154	up	protein_coding	NM_002598	CCDS5316.1	PDCD2	RefSeq	3133	chr6	-	170884659	170893780	GCAGGATGTAACAGATACACCGTAAAGGCATCTTAAAGCCTTGAAAAATGTTAATAATCT	5134	programmed cell death protein 2 isoform 1	6.88436	5.77733
ASHGA5P013643	4.2793e-05	0.00178708	2.15396	up	protein_coding	ENST00000395338	CCDS54585.1	AMT	GENCODE	1955	chr3	-	49454210	49460111	GCTGGTAGAGCTTCCTTCAGGACCCTGCTTCTGAGTGACGGACCAGCTCACACAATGTCT	275	aminomethyltransferase [Source:HGNC Symbol;Acc:473]	4.34476	3.23778
ASHGA5P053149	0.0431628	0.0973001	2.15329	up	protein_coding	NM_032936	CCDS5593.1	TMEM60	RefSeq	882	chr7	-	77423044	77427747	AACTGTTTAAATGAGAATGTCCTTGGCTCAGAGAGTACTACTCACCTGGCTTTTCACACT	85025	transmembrane protein 60	7.72076	6.61422
ASHGA5P053529	0.000250032	0.00499744	2.15297	up	protein_coding	NM_001568	CCDS6308.1	EIF3E	RefSeq	1516	chr8	-	109213971	109260959	AGCACAGACTCCCTTTTCTTTGGCAAGATGGCGGAGTACGACTTGACTACTCGCATCGCG	3646	eukaryotic translation initiation factor 3 subunit E	4.54847	3.44214
ASHGA5P014283	0.000468485	0.00737628	2.15275	up	protein_coding	NM_001018005	CCDS45273.1	TPM1	RefSeq	1246	chr15	+	63334837	63358292	GGACCACGCTCTCAACGATATGACTTCCATATAAGTTTCTTTGCTTCACTTCTCCCAAGA	7168	tropomyosin alpha-1 chain isoform 1	4.80919	3.70301
ASHGA5P009487	5.67316e-06	0.00053667	2.1527	up	protein_coding	NM_001127211	CCDS44482.1	KIAA1598	RefSeq	5361	chr10	-	118642887	118765088	TTACGTTTCAGCCTCCCAGTAGCATTGGATGCAGGAAAAAATACATTGACGGTGAAAAAC	57698	shootin-1 isoform a	4.04085	2.9347
ASHGA5P050736	0.00239531	0.0179799	2.15268	up	protein_coding	NM_052952	CCDS2296.1	DIRC1	RefSeq	1454	chr2	-	189598464	189654831	AACTAAGCCTTACCTAATTACAATGCCCTGCTGCTGCTCATCTCCCTTTATTCGTTTGTA	116093	disrupted in renal carcinoma protein 1	7.80622	6.70008
ASHGA5P025262	0.0172059	0.0574281	2.15101	up	protein_coding	NM_181696	CCDS522.1	PRDX1	RefSeq	1237	chr1	-	45976706	45987610	CCCCACGTAGCTGATAGGAAGATGTCTTCAGGAAATGCTAAAATTGGGCACCCTGCCCCC	5052	peroxiredoxin-1	6.5303	5.42529
ASHGA5P004952	0.0303927	0.0796322	2.15031	up	protein_coding	NM_018455	CCDS10931.1	CENPN	RefSeq	1465	chr16	+	81040102	81056487	TCTGGGTCAGGAGTTAGAAGCTACTGGGAAAATCTACCTCCGACAAGAGGAGATCATTTT	55839	centromere protein N isoform 3	5.64448	4.53994
ASHGA5P028107	0.00468098	0.0265741	2.14798	up	protein_coding	NM_015279	CCDS53813.1	TBC1D30	RefSeq	7840	chr12	+	65218351	65274798	TATATGGCCCTACAGAAAGAACCCCAACTGTGCACTTTCCTCAAATGAGTAGGAGCTTCA	23329	TBC1 domain family member 30	6.00958	4.9066
ASHGA5P044875	0.00175499	0.0150997	2.14711	up	protein_coding	ENST00000523207	CCDS6209.1	KCNB2	GENCODE	3582	chr8	+	73449625	73850584	ATACCTGCTGCCCTGATAAAAGGAAGAAACTGTGGGACTTGCTGGAGAAACCTAACTCAT	9312	"potassium voltage-gated channel, Shab-related subfamily, member 2 [Source:HGNC Symbol;Acc:6232]"	6.02649	4.92409
ASHGA5P005235	0.0382964	0.0907691	2.14672	up	protein_coding	NM_139178	CCDS7906.1	ALKBH3	RefSeq	1585	chr11	+	43902356	43941825	GAACTTCCTTACACTTATTCAAGAATCACTATGGAACCAAATCCTCACTGGCACCCTGTG	221120	alpha-ketoglutarate-dependent dioxygenase alkB homolog 3	7.34616	6.24402
ASHGA5P019932	0.000254734	0.00503605	2.14672	up	protein_coding	NM_052987	CCDS32514.2	CDK10	RefSeq	1643	chr16	+	89753075	89762772	TATTTCAAGGAGAAGCCCCTACGTCTTCCGATCAGTGGTGTCTGTGAAGGGTGCCGCGAG	8558	cyclin-dependent kinase 10 isoform b	4.48406	3.38193
ASHGA5P004988	0.0186646	0.0602268	2.14639	up	protein_coding	NM_144975	CCDS32619.1	SLFN5	RefSeq	4660	chr17	+	33570085	33594761	ATCTGTGAAAACCAGCCCCTGAAGAAGTTGGTGAGTTTCAGCAAGAAAAACATCTGCCAG	162394	schlafen family member 5	5.47133	4.36942
ASHGA5P053245	0.00264335	0.0190421	2.14634	up	protein_coding	NM_001145268	CCDS47676.1	FAM185A	RefSeq	2296	chr7	+	102389398	102449672	TTGTGTCTGATACTATCCACCCCCAGGCGTCCGTGGAGGTGAACGCGCCCCTGAAGTTTG	222234	protein FAM185A isoform 1	8.37256	7.27068
ASHGA5P023013	0.00339638	0.0220484	2.14588	up	protein_coding	NM_001171815	CCDS54057.1	RNF166	RefSeq	1616	chr16	-	88762902	88772800	TGCCCCATCTGCCTGGAGGTCCAGGAGCAGATGGCCAACTGCCCCAAGTTCGTCCCCGTG	115992	RING finger protein 166 isoform 2	5.30974	4.20817
ASHGA5P001467	0.00232924	0.0177207	2.14553	up	protein_coding	NM_172027	CCDS3045.1	ABTB1	RefSeq	1986	chr3	+	127391780	127399769	GCACCCCCTTGTACTATGCCTGCTTGTGTGGGCACGAGGAGCTGGTACTCTACCTTCTGG	80325	ankyrin repeat and BTB/POZ domain-containing protein 1 isoform 2	10.2537	9.15235
ASHGA5P023022	6.11573e-05	0.00219621	2.14476	up	protein_coding	NM_001128302	CCDS10593.1	LYRM1	RefSeq	1425	chr16	+	20912074	20936328	CTGACGCAGAATGACAACGGCAACACGACAAGAAGTCCTTGGCCTCTACCGCAGCATTTT	57149	LYR motif-containing protein 1	6.71814	5.61733
ASHGA5P005994	0.000287159	0.0053675	2.14397	up	protein_coding	NM_018442	CCDS1267.2	DCAF6	RefSeq	3420	chr1	+	167905796	168045083	CTGGTGATAGACGCTCTGCTGTTGCCCGTATTCAGGAGTTCTTCAGACGGAGAAAAGAAA	55827	DDB1- and CUL4-associated factor 6 isoform a	4.66029	3.56001
ASHGA5P049088	0.000142874	0.00354127	2.14152	up	protein_coding	NM_015161	CCDS10572.1	ARL6IP1	RefSeq	2280	chr16	-	18802990	18812857	TACTTCATGACCATGATCGTTTCCCTTGCTGCGGTTGCTTGGGTGGGACAACAAGTCCAC	23204	ADP-ribosylation factor-like protein 6-interacting protein 1	6.13538	5.03675
ASHGA5P053813	0.0386664	0.0912216	2.14151	up	protein_coding	NM_001031725	CCDS30964.1	DDX59	RefSeq	2337	chr1	-	200613164	200639126	CATACCTTCATGACCAGAAGAGAAAGGAACAACAGAAAGATAAACAGACACAGAATGATC	83479	probable ATP-dependent RNA helicase DDX59	6.26614	5.16751
ASHGA5P033761	8.54671e-06	0.000669733	2.14019	up	protein_coding	ENST00000399848	CCDS32794.1	C18orf1	GENCODE	8632	chr18	+	13218785	13652753	ATTCACCTGCACCAGTGGTAAATGCTTGTATCTTGGTTCGCTGGTCTGTAACCAACAGAA	753	chromosome 18 open reading frame 1 [Source:HGNC Symbol;Acc:1224]	4.06371	2.96597
ASHGA5P006027	0.0110692	0.0438584	2.13992	up	protein_coding	NM_012429	CCDS13876.1	SEC14L2	RefSeq	4303	chr22	+	30792929	30821291	CCTGGCATCTATGTCCTGCGGTTTGACAACACCTACAGCTTCATTCATGCCAAGAAGGTC	23541	SEC14-like protein 2 isoform 1	4.4038	3.30625
ASHGA5P006131	0.028441	0.0771376	2.13972	up	protein_coding	NM_003703	CCDS33945.1	NOP14	RefSeq	2939	chr4	-	2939663	2965118	AAATCATGGAACGGGATGCGGAAAGAAAGCGGAAAGTAAAGCAGCTTTTTAACAGCCTGG	8602	nucleolar protein 14	5.83672	4.7393
ASHGA5P052313	0.0134421	0.0494348	2.13891	up	protein_coding	NM_001867	CCDS4063.1	COX7C	RefSeq	448	chr5	+	85913783	85916583	TTCATCTGTCCTCATTCTCTGCGCCTTTCGCAGAGCTTCCAGCAGCGGTATGTTGGGCCA	1350	"cytochrome c oxidase subunit 7C, mitochondrial precursor"	8.44876	7.35188
ASHGA5P009142	7.50492e-06	0.00062444	2.13743	up	protein_coding	NM_001130968	CCDS44910.1	ZNF385A	RefSeq	2110	chr12	-	54762919	54785083	ATGGGGATGGTGTAGCACCCCGTCCAGGTACTAAGCACAAGACAATTCTGGAGGCCCGAA	25946	zinc finger protein 385A isoform b	4.16101	3.06513
ASHGA5P054071	0.0468773	0.101906	2.1372	up	protein_coding	NM_001168478	CCDS14500.1	ARMCX5	RefSeq	2808	chrX	+	101854425	101859085	TAAAACTCTGAATACCCCTCTGTTCTCATAAAGCCTCAAACAGTTTTTTGGAGTTGCAAT	64860	armadillo repeat-containing X-linked protein 5	13.6709	12.5751
ASHGA5P003377	0.000106086	0.0029704	2.1356	up	protein_coding	NM_022118	CCDS9462.1	RBM26	RefSeq	3624	chr13	-	79894099	79979923	TACAAACTACTTCTCCAAAGCCTTTAGTCCAGCAGCCCATTTTGCCTGTTGTGAAGCAGT	64062	RNA-binding protein 26	4.15284	3.0582
ASHGA5P001166	0.000113858	0.0030363	2.13298	up	protein_coding	ENST00000222115	CCDS12838.1	HAS1	GENCODE	2087	chr19	-	52216364	52227221	ATGCTCAGCATGGGTTATGCTACCAAGTACACCTCCAGGTCCCGCTGCTACTCAGAGACG	3036	hyaluronan synthase 1 [Source:HGNC Symbol;Acc:4818]	4.88941	3.79654
ASHGA5P002719	1.06378e-05	0.000727297	2.13182	up	protein_coding	NM_020898	CCDS8864.1	CALCOCO1	RefSeq	3046	chr12	-	54104901	54121307	CAGTTCCAAGCCAGCTACCTGCCCAAACCAGGAGCTCAGCTCTACCAGTTCCGATATGTG	57658	calcium-binding and coiled-coil domain-containing protein 1 isoform 1	4.83481	3.74273
ASHGA5P001878	0.000336848	0.0059616	2.13171	up	protein_coding	NM_020933	CCDS12210.1	ZNF317	RefSeq	4098	chr19	+	9251055	9274091	AACCTCACTTCACTGGGGTATCAGGTCGGCAAACCCAGCCTCATCTCACACTTGGAGCAG	57693	zinc finger protein 317 isoform 1	4.52254	3.43053
ASHGA5P036457	0.006408	0.0315506	2.13082	up	protein_coding	NM_006522	CCDS2425.1	WNT6	RefSeq	1700	chr2	+	219724545	219738954	TTCCGCTTCCGCCGCTGGAATTGCTCCAGCCACAGCAAGGCCTTTGGACGCATCCTGCAA	7475	protein Wnt-6 precursor	5.00319	3.91178
ASHGA5P053938	0.0318705	0.0821519	2.13022	up	protein_coding	NM_005391	CCDS14212.1	PDK3	RefSeq	1803	chrX	+	24483343	24552542	CCAGGGATGCTTCAAAATACAAAGCAAAACAGTAATATACCACCTTGATTTCCATTACAA	5165	"pyruvate dehydrogenase kinase, isozyme 3 isoform 2"	5.67658	4.58557
ASHGA5P045103	0.0291681	0.0782347	2.12853	up	protein_coding	ENST00000382387	CCDS6439.1	C9orf66	GENCODE	2786	chr9	-	213107	215893	GCATATAAGACAAAGTTCACTGCATAGACTACAATAGACTACATACGAAAACAAACCCAA	157983	chromosome 9 open reading frame 66 [Source:HGNC Symbol;Acc:26436]	4.87029	3.78044
ASHGA5P005989	0.000109629	0.00298648	2.12584	up	protein_coding	NM_001002796	CCDS47247.1	MCTP1	RefSeq	3620	chr5	-	94042288	94417545	TTGTAATAAGAAAATAATAAACACTGCTGGAACCAGTAATGCAGAAGTCCCCTTGGCTGA	79772	multiple C2 and transmembrane domain-containing protein 1 isoform S	6.32071	5.23268
ASHGA5P018009	0.0286594	0.0774411	2.1229	up	protein_coding	NM_014760	CCDS33698.1	TATDN2	RefSeq	4909	chr3	+	10290176	10322906	TAAGCAGAGAAGGTACAGTCCTCGGGAGTCTCCTAGAAAAGGGCGACCAGCAGCCTGACA	9797	putative deoxyribonuclease TATDN2	5.71031	4.62427
ASHGA5P001680	0.0021979	0.0171068	2.1221	up	protein_coding	NM_033282	CCDS7376.1	OPN4	RefSeq	2386	chr10	+	88414313	88426216	ACCTTCTGCAGGAGCAGAAGCCTCCGGACACCTGCCAACATGTTCATTATCAACCTCGCG	94233	melanopsin isoform 1	3.94538	2.85989
ASHGA5P049628	0.00230721	0.0176719	2.12136	up	protein_coding	NM_001166588	CCDS53313.1	EIF2B3	RefSeq	1607	chr1	-	45340200	45452394	ACTGTGGAGGAAGGGTATGTTTCCCCCTGTACCCACTTGAGGCAAAGATAATGGAAAAAT	8891	translation initiation factor eIF-2B subunit gamma isoform 2	6.26044	5.17545
ASHGA5P001130	0.00608647	0.0304982	2.1202	up	protein_coding	NM_000400	CCDS33049.1	ERCC2	RefSeq	2568	chr19	-	45854648	45873845	GCGCCATGAAGCTCAACGTGGACGGGCTCCTGGTCTACTTCCCGTACGACTACATCTACC	2068	TFIIH basal transcription factor complex helicase XPD subunit isoform 1	4.41531	3.33111
ASHGA5P009978	0.0252171	0.0723605	2.11962	up	protein_coding	NM_002382	CCDS9771.1	MAX	RefSeq	2068	chr14	-	65541844	65569227	ATTGACGACCTCAAGCGGCAGAATGCTCTTCTGGAGCAGCAAGTCCGTGCACTGGAGAAG	4149	protein max isoform a	4.98496	3.90115
ASHGA5P047655	0.000402767	0.00667332	2.11767	up	protein_coding	NM_152310	CCDS7531.1	ELOVL3	RefSeq	1347	chr10	+	103986142	103989344	TCTCACATGAAGTAAATCAGCTGTTCCAGCCCTATAACTTCGAGCTGTCCAAGGACATGA	83401	elongation of very long chain fatty acids protein 3	5.82988	4.7474
ASHGA5P042291	0.000807222	0.00969714	2.11559	up	protein_coding	NM_003522	CCDS4592.1	HIST1H2BF	RefSeq	430	chr6	+	26199786	26200216	ACCAGCTCTAAGTAATTCTAACGTCTTCATACCCAATCCCAAAGGCTCTTTTAAGAGCCA	8343	histone H2B type 1-C/E/F/G/I	4.13395	3.05289
ASHGA5P051186	0.0106729	0.0427925	2.11531	up	protein_coding	NM_001193414	CCDS54495.1	TUBA8	RefSeq	2095	chr22	+	18593452	18614498	ACTGATTCGTTTGAAGAAGAAAATGAAGGGGAGGAATTTTAAATATATACCTTCCCCTTG	51807	tubulin alpha-8 chain isoform 2	5.68152	4.60065
ASHGA5P034549	0.0359416	0.0876569	2.11025	up	protein_coding	NM_203282	CCDS32983.1	ZNF254	RefSeq	3986	chr19	+	24269975	24312654	GTACTGACATCTCTAGCAATCTTTTTTGCCAGTGGCTTTAAATTGCCAATAAGTTAAAGA	9534	zinc finger protein 254	4.78958	3.71217
ASHGA5P017109	0.0412692	0.0947632	2.10983	up	protein_coding	NM_006524	CCDS34645.2	ZNF138	RefSeq	2504	chr7	+	64254770	64294025	GTTTTCTTGGCTCTGTGTTCTCGTTTTGCCCAAGACCTTTGGCTAGAGCAGAACATAAAA	7697	zinc finger protein 138 isoform 1	6.51561	5.43849
ASHGA5P003657	0.0470801	0.10213	2.10979	up	protein_coding	NM_012100	CCDS42823.1	DNPEP	RefSeq	2438	chr2	-	220238179	220252662	GCTGTGCATCCCAACTACCTGGACAAGCATGAGGAGAACCACCGGCCTTTATTCCACAAG	23549	aspartyl aminopeptidase	5.51743	4.44034
ASHGA5P054066	0.0321298	0.0824035	2.1097	up	protein_coding	NM_001159560	CCDS35350.1	BEX5	RefSeq	882	chrX	-	101408678	101410762	GCCTTATGCCTTGAATCTTGAGGTTAATAATCATAAAATCCCTGCTTTCTAAATTCGCAT	340542	protein BEX5	5.87725	4.80021
ASHGA5P019454	0.000387119	0.00650756	2.10839	up	protein_coding	NM_001039500		VWA5B1	RefSeq	4475	chr1	+	20617411	20681387	AAGATTCGGCACCAGGAAATGACATGGAGGCAAGTCCCACTGCTCTCTTCAGCGAGGCCA	127731	von Willebrand factor A domain-containing protein 5B1 precursor	4.22281	3.14667
ASHGA5P000845	0.0472373	0.102246	2.10782	up	protein_coding	NM_002286	CCDS8561.1	LAG3	RefSeq	1995	chr12	+	6881669	6887621	GAGAAGACAGTGGCGACCAAGACGATTTTCTGCCTTAGAGCAAGGGATTCACCCTCCGCA	3902	lymphocyte activation gene 3 protein precursor	5.78501	4.70926
ASHGA5P053236	0.0058171	0.0297633	2.10738	up	protein_coding	ENST00000308344	CCDS5717.1	CLDN15	GENCODE	1370	chr7	-	100875372	100881227	ACAGCAGCTTTGGCAAATACGGCAGAAACGCCTACGTGTAGCAGCTCTGGCCCGTGGGCC	24146	claudin 15 [Source:HGNC Symbol;Acc:2036]	6.152	5.07655
ASHGA5P008989	0.0087844	0.0379342	2.10689	up	protein_coding	NM_173574	CCDS279.2	ZNF683	RefSeq	1665	chr1	-	26688124	26699266	CAAGTGCTCGGTGTGCCACAAGCGCTTCAGCAGCTCCAGTAACCTCAAGACCCACCTGCG	257101	zinc finger protein 683	4.64221	3.56709
ASHGA5P034411	0.00213385	0.0168639	2.10634	up	protein_coding	NM_198707	CCDS12146.1	HSD11B1L	RefSeq	1897	chr19	+	5680775	5688534	CGGACATGGCCTCCCCTGAGGCGCCCGAGAGCGTGGTGCAGTTTGCGCTGGACAAGCTGG	374875	hydroxysteroid 11-beta-dehydrogenase 1-like protein isoform c	8.6974	7.62266
ASHGA5P050371	0.0300735	0.0793246	2.10574	up	protein_coding	NM_002936	CCDS1647.1	RNASEH1	RefSeq	1648	chr2	-	3592690	3605940	AGAGAAGGAGCTAAACAATCGGAAGACTGAGCCATGTGACTTTAGTCCTTGGGAGAACTT	246243	ribonuclease H1 precursor	5.92512	4.85079
ASHGA5P046689	0.0144461	0.0516558	2.10287	up	protein_coding	NM_001012989	CCDS35420.1	UBE2NL	RefSeq	1190	chrX	+	142967172	142968357	AACAAGCATCACTGCCCTCACTAATAACATTGTGACTTTGCTGTCAAGTGTAGAGTCCCC	389898	putative ubiquitin-conjugating enzyme E2 N-like	7.00664	5.93428
ASHGA5P021792	7.7007e-06	0.000632637	2.10247	up	protein_coding	NM_001220480		PPFIA2	RefSeq	3917	chr12	-	81652044	81763193	ATCTCGAACTTGTCCGGTTTTTCTACAGACCCTGGCTTATGGAGATATGAATCATGAGTG	8499	liprin-alpha-2 isoform i	4.03889	2.96681
ASHGA5P002272	0.0275794	0.0759122	2.09963	up	protein_coding	NM_001799	CCDS3999.1	CDK7	RefSeq	1534	chr5	+	68530621	68573257	CTTAGAACAAGGAGGATTGCCCAAGAAACTAATTTTTTAAAGAGAACACTGGACAACATT	1022	cyclin-dependent kinase 7	6.28861	5.21847
ASHGA5P009060	0.0254019	0.0725989	2.09914	up	protein_coding	NM_005726	CCDS8958.2	TSFM	RefSeq	2039	chr12	+	58176527	58191370	AGGATCAACCCTCTGCATACAGTAAAGGTTTCTTGAATTCCTCTGAGCTTTCTGGACTTC	10102	"elongation factor Ts, mitochondrial isoform 2 precursor"	4.09858	3.02878
ASHGA5P008566	0.0358843	0.0876207	2.09875	up	protein_coding	NM_020185	CCDS4468.1	DUSP22	RefSeq	1511	chr6	+	292100	351355	AACATTCTGGCCGCTCCGGGAATTCTGAAGTTCTGGGCCTTTCTCAGAAGACTGTAATGT	56940	dual specificity protein phosphatase 22	5.99039	4.92086
ASHGA5P054191	0.00407126	0.0246282	2.09784	up	protein_coding	ENST00000424325	CCDS14746.1	RPL10	GENCODE	2318	chrX	+	153626570	153630680	TACTTCCTGTCCACCTATGTCTTTGTATCTACATTCTTGACGGGGAAGGAACTTCCTCTG	6134	ribosomal protein L10 [Source:HGNC Symbol;Acc:10298]	7.87581	6.80691
ASHGA5P046927	0.0051038	0.0279379	2.09692	up	protein_coding	NM_001040273	CCDS31214.1	TYSND1	RefSeq	3485	chr10	-	71897732	71906496	TTTCGGCGCCTTCTGCCCCGACATCTTTCTCAACACGCTGAGCTGCGGGGTGCTCAGCAA	219743	peroxisomal leader peptide-processing protease isoform b	5.836	4.76773
ASHGA5P007154	0.047299	0.102246	2.0963	up	protein_coding	NM_152626	CCDS34646.1	ZNF92	RefSeq	3125	chr7	+	64838767	64865998	CAAAACCCCAGTTATGTGTTCTCATTTTGCCCAAGATGTTTGGCCAGAGCACAGCATAAA	168374	zinc finger protein 92 isoform 2	6.19117	5.12333
ASHGA5P003682	0.0399202	0.092896	2.09567	up	protein_coding	NM_018456	CCDS3006.1	EAF2	RefSeq	1024	chr3	+	121554033	121605373	AATACTTTAAGAAATGATTTGCAGCTGAGTGAATCAGGAAGTGACAGTGATGACTGAAGA	55840	ELL-associated factor 2	7.88493	6.81752
ASHGA5P016281	0.00741774	0.0341382	2.09516	up	protein_coding	NM_003668	CCDS44976.1	MAPKAPK5	RefSeq	2060	chr12	+	112280278	112331228	CTCAGTGTATTCTCCCCCAGGCTGGAGAGAATGAAGATGAGAAACTGAATGAAGTAATGC	8550	MAP kinase-activated protein kinase 5 isoform 1	5.73505	4.66799
ASHGA5P035039	0.00437145	0.0257299	2.09387	up	protein_coding	ENST00000376098	CCDS41264.1	PRAMEF17	GENCODE	1557	chr1	+	13716087	13719064	ATGGATATGCTTTCTTCAGGACCCTTAGGCACTAAAATCTAGGACACAGGTGGGTTTTTT	391004	PRAME family member 17 [Source:HGNC Symbol;Acc:29485]	6.62236	5.55619
ASHGA5P004341	0.010734	0.0429385	2.09314	up	protein_coding	NM_001757	CCDS13641.1	CBR1	RefSeq	1245	chr21	+	37442284	37445462	ATTACTCCCTCTAATAAAACCCCAAGGGAGAGTGGTGAACGTATCTAGCATCATGAGCGT	873	carbonyl reductase [NADPH] 1	4.37861	3.31294
ASHGA5P048995	0.00228143	0.0175668	2.09269	up	protein_coding	NM_004548	CCDS10451.1	NDUFB10	RefSeq	741	chr16	+	2009516	2011976	CCGCTGCCACCTCCTGAGGCAGCTGTGGGTGCCCCTGCTGTGTGGCTCTGTATGACTGTT	4716	NADH dehydrogenase [ubiquinone] 1 beta subcomplex subunit 10	8.59418	7.52882
ASHGA5P010074	0.000678171	0.00898378	2.0917	up	protein_coding	NM_001699	CCDS12574.1	AXL	RefSeq	4716	chr19	+	41725107	41767671	TGGCGCCCAGTGAAGGAACCTTCAACTCCTGCCTTCTCGTGGCCCTGGTGGTATGTACTG	558	tyrosine-protein kinase receptor UFO isoform 2 precursor	4.81331	3.74864
ASHGA5P018131	1.12907e-05	0.000746874	2.09136	up	protein_coding	NM_001114132	CCDS46495.1	NBEAL1	RefSeq	9058	chr2	+	203879601	204082717	TTCTGTGATTCCCTCTGGCACAACATAACTGTTGTCCACATGCCTGGAAAAAGGCCTTTT	65065	neurobeachin-like protein 1	5.66993	4.6055
ASHGA5P029375	0.00135038	0.0129373	2.0911	up	protein_coding	NM_018379	CCDS976.1	FAM63A	RefSeq	2851	chr1	-	150969300	150980854	ATGAGGTTCTGGCAGGCCCAGATGAGCACCCTCAGGACACAGATGCAAGAGATGCTGATG	55793	protein FAM63A isoform 1	3.98973	2.92547
ASHGA5P010490	0.00225834	0.017455	2.09085	up	protein_coding	NM_032969	CCDS14462.1	PCDH11X	RefSeq	9160	chrX	+	91089658	91878228	AGATCTGGATTCATCCCCAACCACAGTCCCAGCGGCGTGTCACATTTCACCTGCCAGAAG	27328	protocadherin-11 X-linked isoform d precursor	5.12793	4.06383
ASHGA5P050327	0.0153231	0.0535415	2.09077	up	protein_coding	NM_207014	CCDS44157.1	WDR78	RefSeq	1764	chr1	-	67303281	67390570	GAATCCCATGGTAACCCAAACAAGAATAAGAAGCATTTTTATCTGGCTGTTGACAAAATT	79819	WD repeat-containing protein 78 isoform 2	4.85493	3.79089
ASHGA5P052077	0.0241588	0.0708013	2.08836	up	protein_coding	NM_014357	CCDS1020.1	LCE2B	RefSeq	619	chr1	+	152658598	152659876	CTGCTGCTGACCTGGGCTAAGAAGAACTCTTTGGACAGAATGTTTAAGAACCTCCTACAG	26239	late cornified envelope protein 2B	9.39335	8.33099
ASHGA5P045432	0.0292123	0.0782537	2.0883	up	protein_coding	NM_001009936	CCDS35117.1	PHF19	RefSeq	1001	chr9	-	123631852	123639606	TCCCATCACAGAGTCTGAGCTCCAAGCAGAAGGGCCACACCTGGGCTTTGGAGACAGATA	26147	PHD finger protein 19 isoform b	5.9724	4.91007
ASHGA5P008140	0.00946597	0.0396786	2.08814	up	protein_coding	NM_021988	CCDS13426.1	UBE2V1	RefSeq	2541	chr20	-	48697660	48732496	TTCACTGCAAAGGAGTAAAAGTCCCTCGCAATTTCCGACTGTTGGAAGAACTCGAAGAAG	7335	ubiquitin-conjugating enzyme E2 variant 1 isoform a	4.95169	3.88947
ASHGA5P031245	0.026721	0.0745977	2.08636	up	protein_coding	NM_003326	CCDS1306.1	TNFSF4	RefSeq	3493	chr1	-	173152869	173176471	TTTTCCATATCTTCATCTTCCCTCTACCCAGATTGTGAAGATGGAAAGGGTCCAACCCCT	7292	tumor necrosis factor ligand superfamily member 4	5.56786	4.50687
ASHGA5P050729	0.0159857	0.0548859	2.08634	up	protein_coding	NM_024813	CCDS740.1	RPAP2	RefSeq	3112	chr1	+	92764521	92853732	TTTGTATGGCCAGAATTATGCTTCTGTGTGTCTGAAACCCGAAGCCTCTCTGGTTAAAGA	79871	putative RNA polymerase II subunit B1 CTD phosphatase RPAP2	5.37648	4.3155
ASHGA5P035767	0.000324258	0.00584276	2.08632	up	protein_coding	NM_007046	CCDS1733.1	EMILIN1	RefSeq	3959	chr2	+	27301434	27309265	TCTCAGCTTCAGCTCCCTCAATGACTCACTGAATGAGCTCCAGACCACTGTGGAGGGCCA	11117	EMILIN-1 precursor	4.21105	3.15009
ASHGA5P033973	0.011211	0.0442424	2.08529	up	protein_coding	NM_030662	CCDS12120.1	MAP2K2	RefSeq	1759	chr19	-	4090319	4124126	GGGATGGATAGCCGGCCTGCCATGGCCATCTTTGAACTCCTGGACTATATTGTGAACGAG	5605	dual specificity mitogen-activated protein kinase kinase 2	6.04323	4.98298
ASHGA5P002501	0.039702	0.0925599	2.08383	up	protein_coding	NM_004109	CCDS8344.1	FDX1	RefSeq	3155	chr11	+	110300660	110335608	TAACAGACAGATCACGGTTGGGCTGCCAAATCTGTTTGACAAAATCTATGGACAATATGA	2230	"adrenodoxin, mitochondrial precursor"	6.52903	5.46979
ASHGA5P048733	0.0298577	0.0791526	2.08359	up	protein_coding	NM_171846	CCDS45275.1	LACTB	RefSeq	1421	chr15	+	63413998	63422026	ATAGAGCAAGGTAAATGAATACCTTCTGCTGTGTCTAGCTATATCGCATCTTAACACTAT	114294	"serine beta-lactamase-like protein LACTB, mitochondrial isoform b"	4.60744	3.54837
ASHGA5P008803	1.96437e-05	0.00114349	2.08208	up	protein_coding	NM_199190	CCDS44880.1	LARP4	RefSeq	6323	chr12	+	50794591	50873788	GCCAATTATGGCTCCCTTTCCCAATGGTAGTTTTGTGAATGGCTTTAATTCGCCAGGATC	113251	la-related protein 4 isoform c	4.97594	3.91791
ASHGA5P013266	0.0369233	0.0888584	2.07962	up	protein_coding	NM_001005781	CCDS2352.1	SUMO1	RefSeq	1078	chr2	-	203070902	203103322	AACAGTTTAGTTTTAAAATTTGAGGGTCTGGACCAAAAGAAGAGGAATATCAGGTTGAAG	7341	small ubiquitin-related modifier 1 isoform a precursor	6.81157	5.75525
ASHGA5P054258	0.0174946	0.0580134	2.07917	up	protein_coding	ENST00000322067	CCDS41469.1	BPNT1	GENCODE	2461	chr1	-	220230823	220263191	ATCCATGGGAATGTTCTTCAGTACCACAAGGATGTGAAGCATATGAACTCTGCAGGAGTC	10380	"3'(2'), 5'-bisphosphate nucleotidase 1 [Source:HGNC Symbol;Acc:1096]"	4.83752	3.78152
ASHGA5P006419	2.8032e-06	0.000344051	2.07836	up	protein_coding	NM_001037333		CYFIP2	RefSeq	6498	chr5	+	156693090	156822606	GCAGAGCCAGTGCAGAATACAGAAACTGCAGCCATGACCACGCACGTCACCCTGGAAGAT	26999	cytoplasmic FMR1-interacting protein 2	4.18911	3.13366
ASHGA5P031801	8.30706e-06	0.000661125	2.07722	up	protein_coding	ENST00000290705	CCDS32454.1	MT1A	GENCODE	396	chr16	+	56672577	56673999	GCGCCTTATAGCCTCTCAACTTCTTGCTTGGGATCTCCAACCTCACCGCGGCTCGAAATG	4489	metallothionein 1A [Source:HGNC Symbol;Acc:7393]	3.92606	2.87141
ASHGA5P011029	2.83752e-05	0.00136348	2.07709	up	protein_coding	NM_145796	CCDS44222.2	POGZ	RefSeq	6351	chr1	-	151375199	151431941	AGAAGACTCTTGTCACACTAATTGCCAACAACAATGCCCCAGGTACCCAGTTTGTTAAGC	23126	pogo transposable element with ZNF domain isoform 3	5.22166	4.1671
ASHGA5P037996	0.00084584	0.0100033	2.07632	up	protein_coding	NM_006786	CCDS91.1	UTS2	RefSeq	584	chr1	-	7907671	7913104	AAGCTGGCCTCCTGCTGTTTGCTTTTCATAGGATTCTTAAATCCTCTCTTATCTCTTCCT	10911	urotensin-2 isoform b preproprotein	5.35407	4.30004
ASHGA5P035825	0.000295817	0.00547906	2.07621	up	protein_coding	NM_152390	CCDS1804.1	TMEM178A	RefSeq	1703	chr2	+	39893034	39945104	TCTGGAGGAAGTGCTACTTCCTGGGCATCGACCGGGACATCGACACCCTCATCCTGAAAG	130733	transmembrane protein 178 isoform 1 precursor	4.04485	2.9909
ASHGA5P029453	0.0428036	0.0967472	2.07575	up	protein_coding	NM_005015	CCDS9573.1	OXA1L	RefSeq	1737	chr14	+	23235730	23240998	TGGCTTTACAGATTTTTACCCACTTCAAATATGGCCGCCAAGCTCCGTTCTCTTTTACCG	5018	mitochondrial inner membrane protein OXA1L	4.01883	2.9652
ASHGA5P013952	0.0121105	0.0464696	2.07562	up	protein_coding	NM_001025204	CCDS42948.1	U2AF1	RefSeq	1038	chr21	-	44513065	44527688	GGCTGACGGCTCACACTACCATTGCCCTCTTGAACATTTACCGTAACCCTCAAAACTCTT	7307	splicing factor U2AF 35 kDa subunit isoform c	6.03555	4.98201
ASHGA5P053681	0.00869697	0.0376524	2.07529	up	protein_coding	NM_001039592	CCDS43798.1	SPAG8	RefSeq	1715	chr9	-	35809806	35812259	TTGCCCTATGAACCTGAGAATTACCCCTACCAATTGGGAGAAATATCTTCCCTTCCCTGT	26206	sperm-associated antigen 8 isoform 1	7.18018	6.12687
ASHGA5P012434	0.0208088	0.0644958	2.07475	up	protein_coding	NM_001135570	CCDS44964.1	C12orf73	RefSeq	1720	chr12	-	104343980	104350993	ACCGGACCTGACAATACCTGAAATTCCACCAAAGCGTGGAGAACTCAAAACGGAGCTTTT	728568	uncharacterized protein C12orf73 precursor	5.81445	4.76151
ASHGA5P011737	0.00559021	0.0291739	2.07192	up	protein_coding	NM_001114753	CCDS48029.1	ENG	RefSeq	3072	chr9	-	130577290	130617047	TCGCACACGCGTTCCCCCAGCAAGCGGGAGCCCGTGGTGGCGGTGGCTGCCCCGGCCTCC	2022	endoglin isoform 1 precursor	4.22683	3.17586
ASHGA5P004183	0.000324654	0.00584276	2.07169	up	protein_coding	ENST00000286657	CCDS3553.1	ADAMTS3	GENCODE	5822	chr4	-	73146685	73434516	TTTTGGTGTTGGCTATAAAATGTGCACCGCGTTCCGAACCTTTGACCCATGTAAACAGCT	9508	"ADAM metallopeptidase with thrombospondin type 1 motif, 3 [Source:HGNC Symbol;Acc:219]"	4.20954	3.15874
ASHGA5P006663	5.26863e-05	0.00200267	2.07153	up	protein_coding	ENST00000321925	CCDS11925.1	SLC14A1	GENCODE	3971	chr18	+	43304091	43332485	ATAAAGATTATAGAGCCAGAGGAAGAGATAGCCATGGAGGACAGCCCCACTATGGTTAGA	6563	"solute carrier family 14 (urea transporter), member 1 (Kidd blood group) [Source:HGNC Symbol;Acc:10918]"	4.19232	3.14162
ASHGA5P012052	0.0126091	0.047616	2.07114	up	protein_coding	NM_024719	CCDS9534.2	GRTP1	RefSeq	1423	chr13	-	113978504	114018463	GTTTATGCAGAAAATATTTTCAGAACCTGGAAGCTTATCCATGGCCACCGTCGCCAAGCT	79774	growth hormone-regulated TBC protein 1	7.50829	6.45786
ASHGA5P006790	0.0144441	0.0516558	2.06806	up	protein_coding	NM_005591	CCDS8299.1	MRE11A	RefSeq	5141	chr11	-	94150468	94227040	ATTATAGATGCCTTTAAATCTACAAGACAGCAGCCTTCCCGAAATGTCACTACTAAGAAT	4361	double-strand break repair protein MRE11A isoform 1	5.33336	4.28508
ASHGA5P002344	0.0320046	0.082248	2.06675	up	protein_coding	NM_181837	CCDS5012.1	ORC3	RefSeq	2589	chr6	+	88299784	88377172	TATCAGTTGATATGGCAGCAGATGAAATCTGAAAATGAGCGACTACAAGAGGAATTAAAT	23595	origin recognition complex subunit 3 isoform 1	4.87385	3.82648
ASHGA5P053988	0.0230514	0.068717	2.0665	up	protein_coding	NM_001098408	CCDS43943.1	GAGE12C	RefSeq	564	chrX	+	49325444	49332811	ACAGTGTTAAAAGAAGACACGTTGAAATGATGCAGGCTGCTCCTATGTTGGAAATTTGTT	729422	G antigen 12B/C/D/E	6.15364	5.10645
ASHGA5P008922	0.000596142	0.00850546	2.06409	up	protein_coding	NM_005847	CCDS4212.1	SLC23A1	RefSeq	2366	chr5	-	138702884	138719039	ACACCTCTCATATTTGGCACCCACGGATACGGGAGGTCCAGGGTGCAATCATGGTGTCCA	9963	solute carrier family 23 member 1 isoform a	6.50515	5.45965
ASHGA5P046297	8.96915e-05	0.00266381	2.064	up	protein_coding	NM_006978	CCDS14589.1	RNF113A	RefSeq	1312	chrX	-	119004494	119005791	GAAGACCCCGATGAGGATGCAATTCCCATTACTTAGGTTTCCCATAATTCTTAAATTTAA	7737	RING finger protein 113A	9.44893	8.40349
ASHGA5P006715	0.000746518	0.00939996	2.06372	up	protein_coding	NM_007103	CCDS8173.1	NDUFV1	RefSeq	1631	chr11	+	67374322	67380012	CGGCGACACGACAGCACCCAAGAAAACCTCATTTGGCTCGCTGAAGGATGAAGACCGGAT	4723	"NADH dehydrogenase [ubiquinone] flavoprotein 1, mitochondrial isoform 1 precursor"	4.40717	3.36192
ASHGA5P008572	0.0174775	0.0579757	2.06117	up	protein_coding	NM_033334	CCDS35137.1	NR6A1	RefSeq	1918	chr9	-	127284702	127533576	TTGACCCAGGCACTATTTCTGTTTCAGATGATCGGGCTGAACAACGAACCTGTCTCATTT	2649	nuclear receptor subfamily 6 group A member 1 isoform 1	5.25754	4.21407
ASHGA5P009707	0.000383509	0.00648971	2.06081	up	protein_coding	NM_174881	CCDS12166.1	CRB3	RefSeq	777	chr19	+	6464259	6467230	CGAGGAGCAGTTCTCCCATGCAGCCGAGGCCCGGGCCCCTCAGGACTCCAAGGAGACGGT	92359	crumbs protein homolog 3 isoform b precursor	4.28102	3.2378
ASHGA5P018831	0.00141264	0.0133493	2.06025	up	protein_coding	NM_005013	CCDS41623.1	NUCB2	RefSeq	1612	chr11	+	17298285	17353070	GAGAATTGAAGTTTGAGCCACACATTTAAAGTCTGAAGTCCACCAGAACTTGGAAGAAAG	4925	nucleobindin-2 precursor	8.20338	7.16056
ASHGA5P018609	0.00146445	0.0135992	2.06025	up	protein_coding	NM_001144890	CCDS46517.1	SLC23A3	RefSeq	2418	chr2	-	220026180	220034817	ACAGAGCAAGGGCAAGGGCCTCCCTCATGCTGCACCTTTGTAGGGGACCTAGCTGCCATG	151295	solute carrier family 23 member 3 isoform 3	5.62381	4.58099
ASHGA5P012096	0.0237078	0.0699424	2.05971	up	protein_coding	NM_052889	CCDS41705.1	CARD16	RefSeq	758	chr11	-	104912052	104916051	CTCTCAGCAGGTCCGATACCTGGAAATTAGCTTAGTACACAAGACTCCCAATTACTATTT	114769	caspase recruitment domain-containing protein 16 isoform 2	7.59086	6.54842
ASHGA5P013206	1.80981e-05	0.0010845	2.05742	up	protein_coding	NM_203499	CCDS32704.1	DDX42	RefSeq	3943	chr17	+	61851566	61896677	ATAGCAGCAGGTCAGTCATTGGCACCATGAACTGGAATAAAGGTGGTCCTGGCACTAAGC	11325	ATP-dependent RNA helicase DDX42	5.88961	4.84877
ASHGA5P050136	4.61803e-05	0.00185944	2.05637	up	protein_coding	ENST00000407280	CCDS46015.1	IFI30	GENCODE	1032	chr19	+	18284578	18288927	TAAAGGCGCTTATTTCCCAGGCAGCCGCTGCAGTCGCCACACCTTTGCCCCTGCTGCGAT	10437	"interferon, gamma-inducible protein 30 [Source:HGNC Symbol;Acc:5398]"	5.01005	3.96995
ASHGA5P004785	0.000806046	0.00969444	2.0551	up	protein_coding	NM_032532	CCDS47512.1	FNDC1	RefSeq	6578	chr6	+	159590428	159693140	AAAGTGAAAGAATACATTCTTTCATACGCCCCGGCTCTCAAACCATTTGGAGCAAAGTCC	84624	fibronectin type III domain-containing protein 1 precursor	4.57953	3.54033
ASHGA5P013151	2.14876e-05	0.00119614	2.05509	up	protein_coding	NM_001018112	CCDS42221.1	FANCA	RefSeq	1673	chr16	-	89864766	89883065	TGAGGTGCTGAGCTTCAGCAGCCCGCTCCTGAGCACACTTCCTCTGCCAGTTACGATAAC	2175	Fanconi anemia group A protein isoform b	4.41737	3.37817
ASHGA5P002576	0.0344144	0.085549	2.05433	up	protein_coding	NM_004664	CCDS9021.1	LIN7A	RefSeq	1235	chr12	-	81191170	81331694	CATGTCATAGGCCCTTGAGGGAAAGCTACTTGATCAAACATCCGATAGTCACAAATTTGA	8825	protein lin-7 homolog A	6.4303	5.39163
ASHGA5P051111	0.000794124	0.00966516	2.05337	up	protein_coding	NM_001697	CCDS13634.1	ATP5O	RefSeq	815	chr21	-	35275756	35288158	TTGCGCGTTTCTCTCTTCCCACTCGGGTTTGACCTACAGCCGCCCGGGAGAAGATGGCTG	539	"ATP synthase subunit O, mitochondrial precursor"	4.71937	3.68137
ASHGA5P050454	0.000104427	0.00296216	2.05331	up	protein_coding	ENST00000306078	CCDS1809.1	KCNG3	GENCODE	3824	chr2	-	42669156	42721237	CAACCGCAGCCTGGATGACCGGAGCAGGTACTCCGCCGGCCCTGGGAGGGAGCCCTCCGG	170850	"potassium voltage-gated channel, subfamily G, member 3 [Source:HGNC Symbol;Acc:18306]"	4.34254	3.30458
ASHGA5P017825	0.00647238	0.0316602	2.05221	up	protein_coding	ENST00000446176	CCDS48040.1	FNBP1	GENCODE	5425	chr9	-	132649465	132805473	ACCTCCAAACCCAAAATCCACTGCTTCAGGAGCCTAAAGCGTGGGCTTTCTCTCAAGCTG	23048	formin binding protein 1 [Source:HGNC Symbol;Acc:17069]	6.19762	5.16044
ASHGA5P034523	0.00449223	0.0260916	2.052	up	protein_coding	NM_173544	CCDS12362.1	FAM129C	RefSeq	2523	chr19	+	17634109	17664648	TGTCTGGAGTTTTCGGCCTACCCCAAGACAATGAGATATTCCTGACCTTTCCACCTATTT	199786	niban-like protein 2 isoform a	8.81589	7.77886
ASHGA5P008421	0.0178811	0.0587787	2.05188	up	protein_coding	ENST00000342960	CCDS53355.1	NBPF10	GENCODE	10697	chr1	+	145293370	145368684	CAGTACCTTGGCTTGGCTCTTGACGTGGACAAAATTGAAAAGAAGGGGAAGGGGAAAAAA	100132406	"neuroblastoma breakpoint family, member 10 [Source:HGNC Symbol;Acc:31992]"	9.03859	8.00165
ASHGA5P009440	0.00338197	0.0220006	2.05179	up	protein_coding	NM_001161403	CCDS54395.1	LIMS2	RefSeq	2062	chr2	-	128395995	128432764	TGACGGGAAGCAATATGTCGGACGCCTTGGCCAACGCCGTGTGCCAGCGCTGCCAGGCCC	55679	LIM and senescent cell antigen-like-containing domain protein 2 isoform 3	5.77154	4.73466
ASHGA5P045888	0.010836	0.0432041	2.05123	up	protein_coding	NM_080546	CCDS6763.1	SLC44A1	RefSeq	4540	chr9	+	108006928	108153682	CTGCTTGAACCTAGCCGACGGTTATGGAAACCCATTGACATTCCAAAACAATATATACAC	23446	choline transporter-like protein 1	4.61875	3.58226
ASHGA5P052343	0.000433989	0.00701854	2.05104	up	protein_coding	NM_001040458	CCDS47250.1	ERAP1	RefSeq	5085	chr5	-	96110187	96143892	AAGCTTGAACGTATGTAAAAATTCCTCCCTTGCCAGGTTCCTGTTATCTCTAATCACCAA	51752	endoplasmic reticulum aminopeptidase 1 isoform b precursor	7.26024	6.22388
ASHGA5P031591	0.0208106	0.0644958	2.04974	up	protein_coding	NM_005622	CCDS10589.1	ACSM3	RefSeq	2158	chr16	+	20775311	20808479	ATTTGAGGTAGAAAATGCCCTGAATGAACACCCTTCAGTTGCAGAGTCAGCTGTTGTCAG	6296	"acyl-coenzyme A synthetase ACSM3, mitochondrial isoform 1"	4.8666	3.83116
ASHGA5P032679	0.00533459	0.0285311	2.04925	up	protein_coding	NM_003255	CCDS11758.1	TIMP2	RefSeq	3670	chr17	-	76849058	76921472	CCGACGCCTGCAGCTGCTCCCCGGTGCACCCGCAACAGGCGTTTTGCAATGCAGATGTAG	7077	metalloproteinase inhibitor 2 precursor	7.03159	5.99649
ASHGA5P001517	0.000683748	0.00898511	2.04747	up	protein_coding	NM_000945	CCDS46310.1	PPP3R1	RefSeq	3111	chr2	-	68405988	68479651	CCGACCCGCCGAGCAAAATGGGAAATGAGGCAAGTTATCCTTTGGAAATGTGCTCACACT	5534	calcineurin subunit B type 1	4.80502	3.77119
ASHGA5P055680	0.000648083	0.00880855	2.04491	up	protein_coding	NM_001002252	CCDS41856.1	ARL6IP4	RefSeq	1402	chr12	+	123464879	123467460	TAACCAAAGAACGACACAGAGAGATCAACAAGGTGGGTGTGGCCCCTCTGCCTGCCATCC	51329	ADP-ribosylation factor-like protein 6-interacting protein 4 isoform 4	5.64666	4.61462
ASHGA5P008362	7.33337e-05	0.00237914	2.0443	up	protein_coding	NM_015868	CCDS33107.1	KIR2DL3	RefSeq	1596	chr19	+	55249973	55264504	TCCGAAACCGGTAACCCCAGACACCTGCATGTTCTGATTGGGACCTCAGTGGTCATCATC	3804	killer cell immunoglobulin-like receptor 2DL3 precursor	5.3287	4.29709
ASHGA5P001171	0.00281059	0.0196994	2.0428	up	protein_coding	NM_000159	CCDS12286.1	GCDH	RefSeq	1839	chr19	+	13001973	13010783	ACCTACGAAGGTACACATGACATTCACGCCCTGATCCTTGGGAGAGCTATCACGGGAATC	2639	"glutaryl-CoA dehydrogenase, mitochondrial isoform a precursor"	4.93599	3.90544
ASHGA5P054143	0.0285216	0.0772327	2.04262	up	protein_coding	NM_012317	CCDS14672.1	LDOC1	RefSeq	1388	chrX	-	140269930	140271310	TCCTTCCAGGCCGTTCGCAATGGTGGATGAGTTGGTGCTGCTGCTGCACGCGCTCCTGAT	23641	protein LDOC1	6.32457	5.29415
ASHGA5P004458	0.00273639	0.019385	2.0419	up	protein_coding	NM_032902	CCDS6429.1	PPP1R16A	RefSeq	2326	chr8	+	145722108	145727504	ATGACCTGGAAGAAGTCCGCCAGTTCCTTGGGAGTGGGGTCAGCCCTGACTTGGCCAACG	84988	protein phosphatase 1 regulatory subunit 16A	4.53109	3.50118
ASHGA5P053987	0.000625391	0.00868699	2.04188	up	protein_coding	NM_001098407	CCDS43941.1	GAGE2D	RefSeq	561	chrX	+	49197562	49223943	CCGGCCCCTTCGCCCACGTGAAGAACGCCAGGGAGCTGTGAGGCAGTGCTGTGTGGTTCC	729408	G antigen 2D	8.14125	7.11136
ASHGA5P010476	0.00674013	0.0323742	2.04157	up	protein_coding	ENST00000361575	CCDS14586.1	RPL39	GENCODE	401	chrX	-	118920468	118925606	CCGCTGCTCGCCATGTCTTCTCACAAGACTTTCAGGATTAAGCGATTCCTGGCCAAGAAA	6170	ribosomal protein L39 [Source:HGNC Symbol;Acc:10350]	9.72438	8.69471
ASHGA5P035437	0.0496539	0.105358	2.03963	up	protein_coding	NM_004882	CCDS2256.1	CIR1	RefSeq	1809	chr2	-	175212877	175260443	GAAGCAGAAGTAGAGAAGAAAGACTGTATGTGACAATTACCTGGGAATAAAAATATCTCC	9541	corepressor interacting with RBPJ 1	7.13897	6.11066
ASHGA5P008815	0.00142787	0.0134298	2.03928	up	protein_coding	NM_001098494	CCDS42637.1	ZNF419	RefSeq	2285	chr19	+	57999078	58006048	ATGCTGGAGAACTTTACACTTCTGGCCTCTCTGGGTTGTTGGCATGGAGCCGAGGCTGAG	79744	zinc finger protein 419 isoform 5	4.34289	3.31483
ASHGA5P002864	0.0387316	0.0912482	2.03893	up	protein_coding	NM_014487	CCDS3754.1	ZNF330	RefSeq	1906	chr4	+	142142048	142155850	AGCATGTCAACACGCTCCCTGAAATTTGGCAGGCAGACTGGAGGTGAAGAGGGAGATGGA	27309	zinc finger protein 330	4.46718	3.43938
ASHGA5P047441	0.000200959	0.00433723	2.03788	up	protein_coding	NM_032804	CCDS7266.2	ADO	RefSeq	3739	chr10	+	64564515	64568239	GTGGGATAAAAGTTATCTTCCCCTTGGAAAGACTAATGAGCACAATGATATTAATCACTT	84890	2-aminoethanethiol dioxygenase	8.96402	7.93695
ASHGA5P001914	0.00584487	0.0298156	2.03713	up	protein_coding	ENST00000249041	CCDS13958.1	GALR3	GENCODE	1157	chr22	+	38219388	38221502	TCTCCGTGGACAGGTACCTGGCCGTGCGGCACCCGCTGCGCTCGCGCGCCCTGCGCACGC	8484	galanin receptor 3 [Source:HGNC Symbol;Acc:4134]	6.82437	5.79783
ASHGA5P000633	0.00160832	0.0144479	2.03652	up	protein_coding	NM_001039933	CCDS42372.1	CD79B	RefSeq	1303	chr17	-	62006097	62009704	CGAGTCATGGGATTCAGCACCTTGGCACAGCTGAAGCAGAGGAACACGCTGAAGGATGGT	974	B-cell antigen receptor complex-associated protein beta chain isoform 3 precursor	7.46035	6.43425
ASHGA5P035586	0.000439339	0.00704811	2.03641	up	protein_coding	ENST00000314933	CCDS228.1	C1QB	GENCODE	1044	chr1	+	22979681	22988029	TTTCCGGGTTCCTGCTCTTTCCAGATATGGAGGCCTGACCTGTGGGCTGCTTCACATCCA	713	"complement component 1, q subcomponent, B chain [Source:HGNC Symbol;Acc:1242]"	5.55142	4.52539
ASHGA5P053888	0.0297618	0.0790783	2.036	up	protein_coding	NM_004669	CCDS7021.1	CLIC3	RefSeq	813	chr9	-	139889059	139891024	AGGAGAAAGAGTTCAAATACACGTGTCCGCACAGCGCCGAGATCCTGGCGGCCTACCGGC	9022	chloride intracellular channel protein 3	6.2336	5.20786
ASHGA5P010449	0.0441056	0.0982866	2.03505	up	protein_coding	NM_017520	CCDS9287.1	MPHOSPH8	RefSeq	4281	chr13	+	20207787	20247599	TGTTTTTCTGGACAGTCATTTTGTTTACTCATTCAGCCCTGTTGCAGGTCCCAATAAACT	54737	M-phase phosphoprotein 8	4.95177	3.9267
ASHGA5P049106	0.0434548	0.0976754	2.03417	up	protein_coding	NM_001888	CCDS10597.1	CRYM	RefSeq	1506	chr16	-	21269838	21314404	TCATCCCGCCTCTAGAGACGGCCCTGGCCAACTTCTCCAGCGGTCCCGAAGGAGGGGTCA	1428	thiomorpholine-carboxylate dehydrogenase isoform 1	6.29148	5.26704
ASHGA5P017152	0.0478629	0.102977	2.03347	up	protein_coding	NM_001040057	CCDS47641.1	FAM133B	RefSeq	2468	chr7	-	92190071	92219706	TTTAACAAAGGCCTATATGAACCCAATAGCAATGGCGAGATCAAGGGGTCCAATCCAGTC	257415	protein FAM133B isoform 2	7.01192	5.98797
ASHGA5P055377	0.0354803	0.0869885	2.03309	up	protein_coding	NM_033124	CCDS8772.1	CCDC65	RefSeq	1832	chr12	+	49297892	49315359	GCCCATCCAGGTGATAAACAACATCCAACCACTTAAAATATAATTGAAGCAGCCCAGATG	85478	coiled-coil domain-containing protein 65	6.79983	5.77616
ASHGA5P036050	0.000150537	0.00366871	2.03261	up	protein_coding	NM_182588	CCDS46381.1	RGPD4	RefSeq	7172	chr2	+	108443387	108509000	AAGGCCTACGGGGAGCGGTACGTCGCCTCCGTGCAGGGCTCCGCCCCGTCGCCTCGAAAG	285190	ranBP2-like and GRIP domain-containing protein 4	4.90354	3.8802
ASHGA5P000851	0.0345992	0.0857782	2.03173	up	protein_coding	NM_012201	CCDS32485.1	GLG1	RefSeq	8300	chr16	-	74481325	74641042	TCAAGGACAGGCTACAATACAGGTCAGAGACAATGGCTTATAAAGGTTTAGTGTGGTCTC	2734	Golgi apparatus protein 1 isoform 1 precursor	7.52412	6.50141
ASHGA5P004873	0.00459638	0.0264039	2.03078	up	protein_coding	NM_197948	CCDS41754.1	CLEC7A	RefSeq	2503	chr12	-	10269375	10282868	AAATGAATTGATTTCAGATCAGAACCACAGCTACCCAAGAAAACCCATCTCCAAATTGTG	64581	C-type lectin domain family 7 member A isoform c	4.82636	3.80433
ASHGA5P007445	0.00090431	0.0103419	2.02976	up	protein_coding	NM_153051	CCDS46682.1	MTMR3	RefSeq	8897	chr22	+	30279157	30426857	ACTTTAATGGAGACTTTGGGGATGAGGTGATGACCCGTTGGCTTCCTGACCACCTGGCCG	8897	myotubularin-related protein 3 isoform b	5.043	4.02169
ASHGA5P018915	0.00011024	0.00298674	2.02955	up	protein_coding	NM_004656	CCDS2853.1	BAP1	RefSeq	3599	chr3	-	52435024	52444009	CCACTGCAGGGGAGCCCTACCACGACATCCGCTTCAACCTGATGGCAGTGGTGCCCGACC	8314	ubiquitin carboxyl-terminal hydrolase BAP1	4.17456	3.1534
ASHGA5P005928	0.0269238	0.0748766	2.02818	up	protein_coding	ENST00000311469	CCDS47090.2	COQ2	GENCODE	1641	chr4	-	84184976	84206067	GACTCACCAGATTTACACTCTAGACATCCACAGACCTGAGGATTGTTGGAATAAATTTAT	27235	"coenzyme Q2 homolog, prenyltransferase (yeast) [Source:HGNC Symbol;Acc:25223]"	5.43375	4.41357
ASHGA5P005641	0.00147805	0.013663	2.02808	up	protein_coding	NM_153373	CCDS4434.1	AGXT2L2	RefSeq	2017	chr5	-	177635539	177659803	GGCTCATCAGCTCTTCCTGCAGACTCTTTTTTCCCGAGGATCCTGTTAAGATTGTCCGGG	85007	alanine--glyoxylate aminotransferase 2-like 2	4.88477	3.86466
ASHGA5P035091	0.034978	0.0864018	2.02774	up	protein_coding	NM_152792	CCDS1897.1	ASPRV1	RefSeq	2216	chr2	-	70187223	70189397	CCATTGTGCCTTATGCCAATAATTCAATTGCTGCAAACACCAATAAAGATTGATTCATGG	151516	retroviral-like aspartic protease 1 precursor	6.51913	5.49926
ASHGA5P003427	0.000796133	0.00967805	2.02732	up	protein_coding	NM_002569	CCDS10364.1	FURIN	RefSeq	4180	chr15	+	91411884	91426687	ACCAGCGAAGCCAACAACTATGGGACGCTGACCAAGTTCACCCTCGTACTCTATGGCACC	5045	furin preproprotein	4.10585	3.08628
ASHGA5P001351	5.59457e-05	0.00206242	2.02678	up	protein_coding	ENST00000228887	CCDS8658.1	GPRC5D	GENCODE	1038	chr12	-	13093708	13103318	AACTTCATATGGTACTCCCATTCAGCCGCAGACTGTTGATCCCACACAAGAGTGTTTCAT	55507	"G protein-coupled receptor, family C, group 5, member D [Source:HGNC Symbol;Acc:13310]"	4.3324	3.31321
ASHGA5P017677	0.00429252	0.0254662	2.02644	up	protein_coding	NM_001190764	CCDS54323.1	TMEM238	RefSeq	711	chr19	-	55890611	55895627	AGTGAGGCCCAGACAACCCCTTGGCTCCAGCTGTCAGGACCAGACTGAGATGTGCAGCTG	388564	transmembrane protein 238	12.0854	11.0664
ASHGA5P021362	0.00705484	0.0331493	2.02623	up	protein_coding	NM_001012635	CCDS45394.1	IL32	RefSeq	892	chr16	+	3115611	3119668	AAGACTGCGTGCAGAAGGCCTTGGCTCCTTGAACTTTTGGCCGCCATGTGCTTCCCGAAG	9235	interleukin-32 isoform C	7.23428	6.21548
ASHGA5P014809	0.000971528	0.0107551	2.0254	up	protein_coding	ENST00000413580	CCDS45726.1	PHOSPHO1	GENCODE	2173	chr17	-	47300731	47308128	TGAGTGGCTGTTTTCCAGTTTCTGGCCTCCGCTGCCTATCTAGGGTGTTGGATGTGCCAG	162466	"phosphatase, orphan 1 [Source:HGNC Symbol;Acc:16815]"	5.25013	4.23193
ASHGA5P010882	0.00417487	0.0250611	2.02422	up	protein_coding	NM_001185092	CCDS53401.1	NIT1	RefSeq	2139	chr1	+	161087861	161095235	TATCCTTCAGCTTTTGGATCCATTACAGGCCCAGCCCACTGGGAGCCCGTCTCCTCTTGA	4817	nitrilase homolog 1 isoform 2	4.51211	3.49475
ASHGA5P051193	0.0436373	0.0978716	2.02313	up	protein_coding	ENST00000263202	CCDS13761.1	UFD1L	GENCODE	1783	chr22	-	19437463	19466738	CCCAATTATGAATTTAAACTTGGTAAGATAACTTTCATCAGAAATTCACGTCCCCTTGTC	7353	ubiquitin fusion degradation 1 like (yeast) [Source:HGNC Symbol;Acc:12520]	7.50332	6.48673
ASHGA5P007697	0.00259674	0.0188579	2.02269	up	protein_coding	NM_023946	CCDS34951.1	LYNX1	RefSeq	1290	chr8	-	143845755	143859639	TGCCTACTGCATGACCACGCGCACCTCTGCAGCCGAAGCCATATGGTGTCACCAGTGCAC	66004	ly-6/neurotoxin-like protein 1 isoform a precursor	4.43808	3.4218
ASHGA5P054266	0.0317337	0.0819511	2.02216	up	protein_coding	NM_003268	CCDS31033.1	TLR5	RefSeq	4277	chr1	-	223282747	223316624	CATCTCCTAATCAAAGGAGCAATTTCCAACTTATCTCAAGCCACAAATAACTCTTCACTT	7100	toll-like receptor 5 precursor	4.9293	3.9134
ASHGA5P041678	0.0325631	0.0833468	2.02149	up	protein_coding	ENST00000340650	CCDS4542.1	NHLRC1	GENCODE	2134	chr6	-	18120717	18122851	GAAAAAGGATTTTGTGGTGGCCATCACTTTCATTCAATTTGCGACTGCTCTGATGGCACA	378884	NHL repeat containing 1 [Source:HGNC Symbol;Acc:21576]	4.92174	3.90632
ASHGA5P011437	8.89981e-05	0.00265095	2.02066	up	protein_coding	NM_006204	CCDS7429.1	PDE6C	RefSeq	2980	chr10	+	95372344	95425429	ACTTGTTGCAATTTTGAAAGAGGACTTGCCAGACCCACGCTCAGCAGAACTGTACGAATT	5146	"cone cGMP-specific 3',5'-cyclic phosphodiesterase subunit alpha'"	4.16369	3.14886
ASHGA5P008917	0.00101866	0.0110173	2.01752	up	protein_coding	ENST00000397570	CCDS7704.1	IRF7	GENCODE	1885	chr11	-	612554	615999	TGTGCTGGAGGCGAGGCCGCGGCCCCAGAGTCCCCGCACCAGGCAGAGCCGTACCTGTCA	3665	interferon regulatory factor 7 [Source:HGNC Symbol;Acc:6122]	4.42032	3.40774
ASHGA5P007339	0.0129311	0.0483233	2.01583	up	protein_coding	NM_176880	CCDS32967.1	NR2C2AP	RefSeq	1316	chr19	-	19312223	19314238	AAGATTGTAGATTTCTACCCTGAGGACAACAACTCGCTTCAGACTTTCCCCATACCAGCT	126382	nuclear receptor 2C2-associated protein	5.30959	4.29821
ASHGA5P053760	0.000691945	0.00904757	2.01562	up	protein_coding	NM_153698	CCDS35073.1	AAED1	RefSeq	1242	chr9	-	99403532	99417599	GAGCGGACCCAGGCCCTCGGCCGCCCCGCGTCATGGCCGCGCCGGCCCCGGTCACGCGGC	195827	UPF0308 protein C9orf21	6.13999	5.12877
ASHGA5P008365	0.0122452	0.0467372	2.01513	up	protein_coding	NM_198337	CCDS5939.1	INSIG1	RefSeq	2728	chr7	+	155089485	155101945	ACAGCAGCTGGTATACATCCCCAGATTTCCTCTATATTCGTTCTTGGCTCCCTTGTATAT	3638	insulin-induced gene 1 protein isoform 3	7.2985	6.28763
ASHGA5P029297	0.000248146	0.00499744	2.015	up	protein_coding	ENST00000357904	CCDS9891.1	C14orf102	GENCODE	3465	chr14	-	90744397	90798279	CCCAATAATACAGCCCTTTGGCAGAAATACCTTTTATTTTGCCAGAGCCAGTTTAGTACC	55051	chromosome 14 open reading frame 102 [Source:HGNC Symbol;Acc:20186]	6.88947	5.87869
ASHGA5P017046	0.000281535	0.00530934	2.01454	up	protein_coding	NM_001127645	CCDS4357.1	GABRA1	RefSeq	4000	chr5	+	161275541	161326965	CCCACAGCAGCTGCTCCAGCCCGCGATGAGGAAAAGTCCAGGTCTGTCTGACTGTCTTTG	2554	gamma-aminobutyric acid receptor subunit alpha-1 precursor	4.21041	3.19996
ASHGA5P014321	0.00131023	0.0127833	2.01408	up	protein_coding	NM_001146288	CCDS54503.1	AIFM3	RefSeq	2439	chr22	+	21321446	21335649	TCTCCAAACCCAAACCAGGCGCTGCCTTGCCCACAGTGGAGCTCAAGATCGAGGTGGTGC	150209	apoptosis-inducing factor 3 isoform 3	4.28797	3.27785
ASHGA5P017800	0.0411221	0.0945195	2.01318	up	protein_coding	NM_001111112	CCDS47043.1	UBE2K	RefSeq	5130	chr4	+	39699663	39784410	AGCAAATCAGAATGCAGTAATAGTGGCCTTGTCTTCAAAATCATGGGATGTAGAGACTGC	3093	ubiquitin-conjugating enzyme E2 K isoform 2	6.6976	5.68812
ASHGA5P028597	0.0322073	0.0825605	2.01306	up	protein_coding	NM_001071775	CCDS31990.1	MZT1	RefSeq	2412	chr13	-	73282494	73301938	AACCCAGAAGCTTTATCATCGGTTATTAAGGAGCTTCGCAAGGCTACTGAAGCACTGAAG	440145	mitotic-spindle organizing protein 1	4.94834	3.93895
ASHGA5P050324	0.0465796	0.101499	2.01278	up	protein_coding	ENST00000301219	CCDS12888.1	LILRA5	GENCODE	1365	chr19	-	54818352	54824409	TGATATTTCAGGATTGGCACAGCCAGAGAAGCCCCCAAGCTGCAGCTGGAAGGTGAACAG	353514	"leukocyte immunoglobulin-like receptor, subfamily A (with TM domain), member 5 [Source:HGNC Symbol;Acc:16309]"	6.97151	5.96232
ASHGA5P048671	1.40252e-06	0.000207176	2.01195	up	protein_coding	NM_032892	CCDS10107.2	FRMD5	RefSeq	2261	chr15	-	44165729	44487429	AACAATTCCACTATCAATACTTTTGTCCCCTCAGGCGATGGTTTGCCTGCAAAATCCGCT	84978	FERM domain-containing protein 5 isoform 2	4.09968	3.09108
ASHGA5P004510	3.62652e-05	0.00159928	2.01093	up	protein_coding	NM_172089	CCDS11108.1	TNFSF12-TNFSF13	RefSeq	1882	chr17	+	7452374	7464925	TGTACTGTCAGAGTTCCGATGCCCTGGAAGCCTGGGAGAATGGGGAGAGATCCCGGAAAA	407977	TNFSF12-TNFSF13 protein	4.13996	3.13209
ASHGA5P002662	0.00281466	0.0197065	2.01044	up	protein_coding	NM_024953	CCDS9159.1	NAA25	RefSeq	5825	chr12	-	112464492	112546635	CATCATCATGCCACCTGTCTTTACCAGTTTCCAAGACTATGTTACTGGGCTTCAGACTTT	80018	"N-alpha-acetyltransferase 25, NatB auxiliary subunit"	4.27338	3.26587
ASHGA5P053924	0.0263215	0.0739248	2.01027	up	protein_coding	NM_014176	CCDS1425.1	UBE2T	RefSeq	935	chr1	-	202300784	202311094	CCTGATGTTTAGGGGACTTGTCCTGGTTCATCTTAGTTAATGTGTTCTTTGCCAAGGTGA	29089	ubiquitin-conjugating enzyme E2 T	5.76562	4.75823
ASHGA5P012086	0.00116022	0.0119506	2.00996	up	protein_coding	NM_000434	CCDS4723.1	NEU1	RefSeq	2088	chr6	-	31826828	31830709	TGAATGCCAGCCCTATGAGCTCCCAGATGGCTCAGTCGTCATCAATGCCCGAAACCAGAA	4758	sialidase-1 precursor	7.95043	6.94327
ASHGA5P042316	0.0466144	0.101531	2.00973	up	protein_coding	ENST00000244623	CCDS4642.1	OR2B6	GENCODE	942	chr6	+	27925018	27925960	CAAGGAGGTAAAGGAAGGCTTTAAAAGGTTGGTTGCAAGAGTCTTCTTAATCAAGAAATA	26212	"olfactory receptor, family 2, subfamily B, member 6 [Source:HGNC Symbol;Acc:8241]"	5.04032	4.03332
ASHGA5P012054	0.0138073	0.0503132	2.00962	up	protein_coding	NM_001008895	CCDS41908.1	CUL4A	RefSeq	3797	chr13	+	113863930	113919392	AAGAAGCTGGTCATCAAGAACTTCCGAGACAGACCTCGGCTGCCCGACAACTACACGCAG	8451	cullin-4A isoform 1	5.26875	4.26182
ASHGA5P054939	0.00207412	0.0166327	2.00908	up	protein_coding	NM_004322	CCDS8065.1	BAD	RefSeq	1240	chr11	-	64037299	64052176	TGTCCTCACAGCCCAGAGCATGTTCCAGATCCCAGAGTTTGAGCCGAGTGAGCAGGAAGA	572	bcl2 antagonist of cell death	4.73037	3.72383
ASHGA5P005800	0.0211179	0.065072	2.00847	up	protein_coding	NM_031492	CCDS8149.1	RBM4B	RefSeq	1814	chr11	-	66432469	66445275	TTTTAAAAACTGGAGGTAGGATAATTGCGGACTGAACCCTCGGGCTGCGGTCATATATGA	83759	RNA-binding protein 4B	7.76749	6.7614
ASHGA5P010440	0.0057472	0.0295997	2.00788	up	protein_coding	NM_145080	CCDS10628.2	NSMCE1	RefSeq	1079	chr16	-	27236314	27280113	ACAGCCTCCTCATCCAGGGTCAAAGCTGCGAAACCTGTGGGATCAGGATGCACTTACCCT	197370	non-structural maintenance of chromosomes element 1 homolog	6.18948	5.18381
ASHGA5P034008	0.0153984	0.0536653	2.00784	up	protein_coding	NM_005001	CCDS42492.1	NDUFA7	RefSeq	585	chr19	-	8376183	8386280	ATTACTATTGCACTCGCGATGGCCGCCGGGAATCTGTGCCCCCTTCCATCATCATGTCGT	4701	NADH dehydrogenase [ubiquinone] 1 alpha subcomplex subunit 7	10.3458	9.34013
ASHGA5P055062	0.000170455	0.00396721	2.00743	up	protein_coding	NM_001162952	CCDS53687.1	SYTL2	RefSeq	2645	chr11	-	85405264	85430383	AGTGCCTACACAACCTGATAATCCATTTTCTCACCCTGACAAACTCAAAAGGATGAGCAA	54843	synaptotagmin-like protein 2 isoform h	3.72713	2.72177
ASHGA5P037600	0.00458794	0.0264039	2.00469	up	protein_coding	NM_206956	CCDS13801.1	PRAME	RefSeq	2197	chr22	-	22890122	22901550	AGATTTGGAAGTGACTTGTACCTGGAAGCTACCCACCTTGGCGAAATTTTCTCCTTACCT	23532	melanoma antigen preferentially expressed in tumors	6.80916	5.80578
ASHGA5P050177	0.00129987	0.0127447	2.00344	up	protein_coding	ENST00000401500	CCDS46059.1	WDR62	GENCODE	4745	chr19	+	36545782	36596012	TTCCCCGCAGCTCTGGGAGACGTGGAGGCCTCTGAAGCTGAAGACCACTTCTTCAACCCA	284403	WD repeat domain 62 [Source:HGNC Symbol;Acc:24502]	4.12926	3.12678
ASHGA5P013427	6.1989e-07	0.000126007	2.00258	up	protein_coding	NM_001134402	CCDS44189.1	CYB561D1	RefSeq	4816	chr1	+	110036657	110043063	ATGCAGCCCCTGGAGTTCTGCCTCTGCATGGCTGAAGCCATCCTACTCTTCTCACCTGAA	284613	cytochrome b561 domain-containing protein 1 isoform 3	6.35658	5.35473
ASHGA5P048028	0.000135141	0.00341607	2.0014	up	protein_coding	NM_014186	CCDS7900.1	COMMD9	RefSeq	3006	chr11	-	36293841	36310999	TTCAGCCCTTGGCTTGAAAAAACTCTTGGATGTTACATGTTCCAGCTTGTCTGTGACCCA	29099	COMM domain-containing protein 9 isoform 1	7.36225	6.36123
ASHGA5P001366	0.0205409	0.0640104	2.00102	up	protein_coding	NM_020244	CCDS9086.1	CHPT1	RefSeq	1567	chr12	+	102091416	102122846	AAGCACCTGAACAGGTTCAAGTTCTTTCTTCAAAGAGTCATCAGAATAACATGGATTGAA	56994	cholinephosphotransferase 1	7.69862	6.69789
ASHGA5P004779	0.0375725	0.0898376	2.00019	up	protein_coding	NM_203288	CCDS5440.1	RP9	RefSeq	1184	chr7	-	33134409	33149002	GCAGTTCAGAGTGGCACATGAAGATCCCATGTATGACATCATACGAGACAATAAACGACA	6100	retinitis pigmentosa 9 protein	6.14184	5.1417
ASHGA5P013432	0.00363238	0.0229525	2.00001	up	protein_coding	NM_001178100	CCDS54376.1	CD8B	RefSeq	944	chr2	-	87042459	87089047	ACCCAGAAGGGCCTCAAGGGGAAGGTATATCAGGAACCTTTGTCCCCCAATGCCTGCATG	926	T-cell surface glycoprotein CD8 beta chain isoform 6 precursor	6.00326	5.00325
