# Supplementary material for: Age and poverty status alter the coding and noncoding transcriptome
Source: Aging (Albany NY). 2019 Feb 17;11(4):1189–203. doi: 10.18632/aging.101823 (PMC6402526; doi:10.18632/aging.101823)
Supplement: Supplementary Table 7 [file aging-11-101823-s008.xlsx]

## Sheet: Sheet1
Supplementary Table 7. mRNAs significantly lower in abundance in young white males.
ProbeName	P-value	FDR	Fold Change	Regulation	type	seqname	ccdsID	GeneSymbol	source	RNAlength	chrom	strand	txStart	txEnd	Sequence	EntrezID	product	group-Y(normalized)	group-O(normalized)
ASHGA5P043324	0.00215189	0.0169736	30.4834	down	protein_coding	ENST00000241312	CCDS380.1	CSMD2	GENCODE	13108	chr1	-	33979608	34631443	TTTCTTCCTTCCTGAGAGGTTTTGATCTCTCGGAGTTGGAAAGAACCAACTCAACTCCTC	114784	CUB and Sushi multiple domains 2 [Source:HGNC Symbol;Acc:19290]	3.62778	8.55773
ASHGA5P049694	2.20185e-05	0.00119961	25.302	down	protein_coding	NM_133373		PLCD3	RefSeq	3477	chr17	-	43189007	43209891	ATCTATCATGGCCATACCCTCACCTCCAAGATTCTCTTCCGGGACGTGGTCCAAGCCGTG	113026	"1-phosphatidylinositol 4,5-bisphosphate phosphodiesterase delta-3"	3.85647	8.51765
ASHGA5P033105	0.00279289	0.0196507	24.1081	down	protein_coding	ENST00000394008	CCDS54127.1	KRTAP9-9	GENCODE	981	chr17	+	39411635	39412616	CTTCCTTCTTTTAATGATCACTTTGGGTTATCTCCCTATAACCAGGGATCTTACCTATAT	81870	keratin associated protein 9-9 [Source:HGNC Symbol;Acc:16773]	3.50627	8.09771
ASHGA5P033104	0.00163381	0.0145248	19.4138	down	protein_coding	NM_033191	CCDS11386.1	KRTAP9-4	RefSeq	990	chr17	+	39405938	39406905	CCTTCTTTCTTCTTTTCATAACTTTGGGTTATGTTTCTGCTACCAGCAGAGATTCTTAGC	85280	keratin-associated protein 9-4	2.53205	6.81106
ASHGA5P036681	0.00287817	0.0199863	17.7345	down	protein_coding	NM_001242671		C20orf78	RefSeq	659	chr20	-	18790371	18810839	AAGAACCTGCCTTCCTTCCTTCATGGTCCAAGCAAATGTTCCAGGTATTTAAGCCACATG	100128496	putative uncharacterized protein C20orf78	7.01602	11.1645
ASHGA5P039988	0.000272321	0.0051853	14.586	down	protein_coding	NM_178497	CCDS3569.1	C4orf26	RefSeq	1882	chr4	+	76481257	76491103	GTGTAACCACCGTTTTCCATTCCAGCCATTTTATTGGCCACACCGTTACCTTACTTATAG	152816	uncharacterized protein C4orf26 isoform 2 precursor	5.90832	9.77483
ASHGA5P006435	0.000337085	0.0059616	14.3592	down	protein_coding	NM_203467	CCDS9687.1	LRR1	RefSeq	1049	chr14	+	50065414	50081390	TCTAAGTAAGGATTCCATATGGCTCTCATATCATTCCATTCCATCTCTGCCAAGATTTGG	122769	leucine-rich repeat protein 1 isoform 3	7.28669	11.1306
ASHGA5P048748	0.000597193	0.00850701	14.2214	down	protein_coding	NM_017851	CCDS10204.1	PARP16	RefSeq	2551	chr15	-	65550436	65579018	AGCCGCCTAGAAAACTTCCATTCCATTATCCACAATGGCCTGCACTGCCATCTGAACAAG	54956	poly [ADP-ribose] polymerase 16	7.09437	10.9244
ASHGA5P034053	0.00200024	0.0163404	14.1734	down	protein_coding	NM_030824	CCDS12271.1	ZNF442	RefSeq	2825	chr19	-	12460184	12476475	GAAGACAGAAGTGATCTCTTCCTTCCTGACTCTCAGACTAATGAAGAGAGAAAACAATAT	79973	zinc finger protein 442	3.57283	7.39794
ASHGA5P033783	0.00479469	0.0269418	13.3104	down	protein_coding	NM_138375	CCDS42418.1	CABLES1	RefSeq	4307	chr18	+	20735788	20840434	CCTTCCTTGAATGCTTTCTAAGAGGGGCTGCCATGCAAGAATATATGCTGATTTTCCCAT	91768	CDK5 and ABL1 enzyme substrate 1 isoform 1	3.10527	6.83975
ASHGA5P054528	0.00231951	0.0177082	11.7749	down	protein_coding	NM_001549	CCDS7402.1	IFIT3	RefSeq	2552	chr10	+	91087601	91100725	CCAGTTTCCTCTTCCTTCCCCTAAAAGCAATTACTCAAAAACGGAGAAAACATCAGCTGA	3437	interferon-induced protein with tetratricopeptide repeats 3	6.16908	9.72673
ASHGA5P006510	0.018393	0.0598243	11.3456	down	protein_coding	NM_005238	CCDS8475.1	ETS1	RefSeq	5242	chr11	-	128328655	128392205	CCCTCCCCGGATATGGAATGTGCAGATGTCCCACTATTAACTCCAAGCAGCAAAGAAATG	2113	protein C-ets-1 isoform 2	7.18717	10.6912
ASHGA5P054236	0.00443847	0.0259092	11.2144	down	protein_coding	NM_000651	CCDS44308.1	CR1	RefSeq	9979	chr1	+	207669472	207815110	CCTTCCTTGACAAAGTACTATACAGCTGAAGAACATCTCGAATACAATTTTGGTGGGAAA	1378	complement receptor type 1 isoform S precursor	3.32495	6.81223
ASHGA5P008969	0.00205826	0.0166014	10.5079	down	protein_coding	ENST00000349339	CCDS13270.1	C20orf152	GENCODE	1927	chr20	+	34556528	34618622	AGAAATTTTGGCCTTCCTTCCAGAGGGTGAATGCGACACACGACCCTTGATCCTGATGAG	140894	chromosome 20 open reading frame 152 [Source:HGNC Symbol;Acc:16145]	4.44148	7.83488
ASHGA5P055284	0.0054917	0.0289415	9.89048	down	protein_coding	NM_024865	CCDS31736.1	NANOG	RefSeq	2098	chr12	+	7941994	7948655	TTTTTCCTCCTCTTCCTCTATACTAACATGAGTGTGGATCCAGCTTGTCCCCAAAGCTTG	79923	homeobox protein NANOG	6.13114	9.43718
ASHGA5P047409	0.00270094	0.0192274	9.54746	down	protein_coding	NM_003055	CCDS7231.1	SLC18A3	RefSeq	2440	chr10	+	50818346	50820766	TGTGTAGAGCCTGCATCTGTCTGTCCTTCCTTCCATTGCTCCCAGTGCCAAACTTGGGCC	6572	vesicular acetylcholine transporter	6.39956	9.65468
ASHGA5P055376	0.003523	0.022529	9.17029	down	protein_coding	NM_015270	CCDS8767.1	ADCY6	RefSeq	6583	chr12	-	49159974	49177877	ATGGTCTCTAATACTATCTCCTTCCTTCCCTACCAGCAACATGTCATGGTTTAGTGGCCT	112	adenylate cyclase type 6 isoform a	7.36548	10.5624
ASHGA5P055443	0.000120637	0.00313503	8.88579	down	protein_coding	ENST00000430889	CCDS8873.1	HOXC4	GENCODE	1666	chr12	+	54447660	54449814	TCCACTCCAGAAATTAATGATCATGAGCTCGTATTTGATGGACTCTAACTACATCGATCC	3221	homeobox C4 [Source:HGNC Symbol;Acc:5126]	3.71579	6.86729
ASHGA5P032403	0.00151865	0.0138873	8.60238	down	protein_coding	NM_033184	CCDS32648.1	KRTAP2-4	RefSeq	812	chr17	-	39221367	39222131	GTCACCATCATCTTTTGCAATGTGTTGCTCACTGTTGTCAATAAACTAATTTTTCCTGGC	85294	keratin-associated protein 2-4	3.27291	6.37765
ASHGA5P047424	0.00183703	0.0155689	8.56111	down	protein_coding	NM_012242	CCDS7246.1	DKK1	RefSeq	1815	chr10	+	54074040	54077417	AAGTGACGGTCATTTTCTCTTTCTTTCTCCCTCTTGAGTCCTTCTGAGATGATGGCTCTG	22943	dickkopf-related protein 1 precursor	5.41881	8.51661
ASHGA5P007584	0.00277999	0.0195985	8.46011	down	protein_coding	NM_013373	CCDS13776.1	ZDHHC8	RefSeq	5029	chr22	+	20119363	20135530	ACACCACCATCACCATGGCTGTCATGTGTGTGGCCGGCCTCTTCTTCATCCCTGTCATTG	29801	probable palmitoyltransferase ZDHHC8 isoform 2	5.98888	9.06956
ASHGA5P003615	0.000924434	0.0104869	8.23165	down	protein_coding	NM_005742	CCDS1675.1	PDIA6	RefSeq	2344	chr2	-	10923516	10952960	CTGGTGCTCGGTCTGGTGAGCTGTACCTTCTTTCTGGCAGTGAATGGTCTGTATTCCTCT	10130	protein disulfide-isomerase A6 precursor	4.01299	7.05417
ASHGA5P037165	1.41436e-05	0.000906171	8.22473	down	protein_coding	ENST00000370487	CCDS13503.1	C20orf20	GENCODE	1636	chr20	+	61427804	61431945	TGAGATTCTTCCATTCCCGAATCCAGAGAGGAACTTCGTCCTTCCAGAAGAGATCATTCA	55257	chromosome 20 open reading frame 20 [Source:HGNC Symbol;Acc:15866]	2.83745	5.87742
ASHGA5P012030	0.00940121	0.0395965	8.13597	down	protein_coding	NM_003671	CCDS6721.1	CDC14B	RefSeq	5472	chr9	-	99262394	99382112	TTCCTCTCACTCTCTCCATTTCAAGGACTAAAACAGTCTTGCGTTAAGTAAAAACCTGTG	8555	dual specificity protein phosphatase CDC14B isoform 1	4.99188	8.01619
ASHGA5P052578	0.000455803	0.00721087	8.01384	down	protein_coding	NM_153020	CCDS4538.1	RBM24	RefSeq	2399	chr6	+	17282931	17294099	TTTAGAGGTTATGTATGTATGTCTGTGTGTGTCTGTTGCTAAGGTCACCATGGCTGACCG	221662	RNA-binding protein 24 isoform 2	3.91616	6.91866
ASHGA5P010956	2.91707e-05	0.00138677	8.00485	down	protein_coding	NM_001003396	CCDS34527.1	TPD52L1	RefSeq	1327	chr6	+	125474878	125584644	CCATCAGCAAGAAGTTCGGAGACATGAGTTACTCCATTCGCCATTCCATAAGTATGCCTG	7164	tumor protein D53 isoform 3	3.30221	6.30308
ASHGA5P054380	0.00161119	0.0144568	7.91731	down	protein_coding	NM_018324	CCDS7106.1	OLAH	RefSeq	1834	chr10	+	15085894	15115851	GTAGGCGTGAGCCACCGTGCCTGGCCAAAATTCTTGGTCTATTCTGGATTCTAATTTTTT	55301	"S-acyl fatty acid synthase thioesterase, medium chain isoform 1"	7.45845	10.4435
ASHGA5P012794	0.00029473	0.00546888	7.84218	down	protein_coding	NM_020135	CCDS4475.1	WRNIP1	RefSeq	2670	chr6	+	2765665	2785979	AATAAATCTCAGCAGGACACTTTCCTTCCTCACGTGGAATGTGGGACGATCACTCTGATT	56897	ATPase WRNIP1 isoform 1	2.42457	5.39583
ASHGA5P049996	0.00408808	0.0247006	7.81125	down	protein_coding	NM_020783	CCDS11922.1	SYT4	RefSeq	4111	chr18	-	40847856	40857615	GTCTTCACAGTCTCTCTCTTTGCATGGATCTGCTGTCAGAGAAAATCATCCAAGTCTAAC	6860	synaptotagmin-4	4.55131	7.51687
ASHGA5P052592	0.000738685	0.00935944	7.77337	down	protein_coding	ENST00000377791	CCDS4585.1	HIST1H2AC	GENCODE	546	chr6	+	26124372	26124918	TTTTGTTTGTTTTCTCGTGAGCTTAGGCCGCTGGTTTTGGTGATTTTTGTCTGATTGCAA	8334	"histone cluster 1, H2ac [Source:HGNC Symbol;Acc:4733]"	3.5884	6.54694
ASHGA5P015940	0.00219199	0.0170979	7.72461	down	protein_coding	NM_133505	CCDS9041.1	DCN	RefSeq	1456	chr12	-	91539034	91572329	TCTGATTTGGGTCTTCCTCCTTCCCTTACGGAATTACATCTTGATGGCAACAAAATCAGC	1634	decorin isoform c precursor	5.99737	8.94683
ASHGA5P012097	0.0015066	0.0138153	7.49881	down	protein_coding	ENST00000375707	CCDS31662.1	CARD17	GENCODE	466	chr11	-	104963195	104972158	TTCCTTCCTAGGTTCAACTTTCATTTGAGCAGCCAGATGATAAAGCACAGATGCCCAGCA	440068	"caspase recruitment domain family, member 17 [Source:HGNC Symbol;Acc:33827]"	3.87399	6.78065
ASHGA5P050131	0.00491957	0.0273856	7.49552	down	protein_coding	NM_133644	CCDS32950.1	GTPBP3	RefSeq	2708	chr19	+	17448325	17453540	TCTCTCTCTGCCTGCCTTCTCTCACCCACAGCCGACATCGAAGTACGGGCACTGCAGGTG	84705	"tRNA modification GTPase GTPBP3, mitochondrial isoform IV"	7.96641	10.8724
ASHGA5P034645	6.32399e-05	0.00222773	7.46049	down	protein_coding	NM_005026	CCDS104.1	PIK3CD	RefSeq	5411	chr1	+	9711789	9789172	ACCTGACCATGGTCCATTCCTCCTCCATCCTCGCCATGCGGGATGAGCAGAGCAACCCTG	5293	"phosphatidylinositol 4,5-bisphosphate 3-kinase catalytic subunit delta isoform"	3.96107	6.86034
ASHGA5P049208	0.000151769	0.00367239	7.37868	down	protein_coding	NM_001099439	CCDS41305.1	EPHA10	RefSeq	5526	chr1	-	38181645	38230824	GGGTGCAGGTGTGAGTGGACCCCATTCTTCCAAGGCAGGACTCCGGTGGGGGTCCAGTCC	284656	ephrin type-A receptor 10 isoform 3 precursor	4.6895	7.57286
ASHGA5P047291	0.0101665	0.0414204	7.30007	down	protein_coding	NM_178161	CCDS7143.1	PTF1A	RefSeq	1339	chr10	+	23481459	23483181	GCCTTTCCTTCTTCGTACTTCGACGAGGACGACTTCTTCACCGACCAGTCTTCACGGGAC	256297	pancreas transcription factor 1 subunit alpha	3.37206	6.23997
ASHGA5P043720	0.00193419	0.0160062	7.17245	down	protein_coding	NM_001305	CCDS5560.1	CLDN4	RefSeq	1846	chr7	+	73245192	73247015	GGGGTTTTTCCTCTTCCTTCTTTGTGGTTTCTGTTTTGTAATTTAAGAAGAGCTATTCAT	1364	claudin-4	4.08579	6.92826
ASHGA5P001267	0.000197107	0.00429963	7.03508	down	protein_coding	NM_018952	CCDS11531.1	HOXB6	RefSeq	1686	chr17	-	46673098	46682334	TGCTCCACTCCGGTCTACCCGTGGATGCAGCGGATGAATTCGTGCAACAGTTCCTCCTTT	3216	homeobox protein Hox-B6	5.09409	7.90866
ASHGA5P004410	0.00183647	0.0155689	7.03139	down	protein_coding	NM_058180	CCDS13735.1	C21orf58	RefSeq	2991	chr21	-	47721046	47743785	AACTTCCTTCTCCTGACTCAGGCCACAGTCTTCTGTGTGGCTGGTCTCCAGGAGGTAAGG	54058	uncharacterized protein C21orf58	2.2976	5.11141
ASHGA5P017735	0.00713909	0.0334198	7.01056	down	protein_coding	ENST00000445202	CCDS44764.1	PATE3	GENCODE	1336	chr11	+	125658005	125661495	TGTTCCTCTTCCTCCTTTACTGCCTCATTGTGGCAGTGACATCACTTCAGTGCATAACAT	100169851	prostate and testis expressed 3 [Source:HGNC Symbol;Acc:35426]	5.65133	8.46086
ASHGA5P009263	0.000861496	0.0100643	6.91679	down	protein_coding	NM_003099	CCDS32266.1	SNX1	RefSeq	8332	chr15	+	64388082	64436433	ACAGCAGCAGCTGGCAAAGTACTGGGAAGCCTTCCTTCCTGAGGCAAAGGCCATCTCCTA	6642	sorting nexin-1 isoform a	4.73968	7.52978
ASHGA5P034278	0.000404186	0.00667332	6.87908	down	protein_coding	NM_000815	CCDS36.1	GABRD	RefSeq	1942	chr1	+	1950767	1962192	AGCTGGCGCAGTTCACCATCACCAGCTACCGCTTCACCACGGAGCTGATGAACTTCAAGT	2563	gamma-aminobutyric acid receptor subunit delta precursor	3.81243	6.59464
ASHGA5P055970	0.00272252	0.0193405	6.79343	down	protein_coding	NM_003317	CCDS9659.1	NKX2-1	RefSeq	2352	chr14	-	36985603	36988903	TTTTCCTCCTCTTCCTTCCTCCTCCAGCCGCCGCCGAATCATGTCGATGAGTCCAAAGCA	7080	homeobox protein Nkx-2.1 isoform 2	10.7829	13.547
ASHGA5P053254	0.00367564	0.0230671	6.55355	down	protein_coding	NM_182715	CCDS47685.1	SYPL1	RefSeq	2300	chr7	-	105730813	105752791	TCTCTCCCTCCTTTCCTCAGAGGATGTCCGGCTTCCAGATCAACCTCAACCCGCTCAAGG	6856	synaptophysin-like protein 1 isoform b	8.20762	10.9199
ASHGA5P008997	0.00210959	0.0167632	6.44963	down	protein_coding	NM_013291	CCDS34966.1	CPSF1	RefSeq	4494	chr8	-	145618445	145634733	CTTTAAGAAGGTCCCTCACAACATCAACTTCCGTGAGAAGAAGCCAAAGCCATCCAAGAA	29894	cleavage and polyadenylation specificity factor subunit 1	2.82777	5.51698
ASHGA5P015289	0.00297387	0.0203731	6.36744	down	protein_coding	ENST00000429604	CCDS12859.1	ZNF160	GENCODE	4336	chr19	-	53569866	53606687	GTGGTCACAGATATCCCTCCTAAATGTACAATCAAGGATTTGCTACCAAAAGAGAAGAGC	90338	zinc finger protein 160 [Source:HGNC Symbol;Acc:12948]	4.49878	7.16949
ASHGA5P010759	0.0110354	0.0438103	6.36081	down	protein_coding	NM_017909	CCDS5232.1	RMND1	RefSeq	1928	chr6	-	151725988	151773316	TTCCTTCTTCTCTTCCGGCGGAGAGCTTGGGATGTGGTAATGCCAGCCACACTCCTCAGA	55005	required for meiotic nuclear division protein 1 homolog	3.06454	5.73375
ASHGA5P006167	0.000747795	0.00939996	6.2931	down	protein_coding	NM_001145093	CCDS46803.1	ZNF619	RefSeq	4051	chr3	+	40518603	40531728	AATGTGACTTCCTTGTCAGCATTTCCATTCCCCAAACCAGATCTGATATTCCAGCTGGAG	285267	zinc finger protein 619 isoform 2	4.28274	6.93651
ASHGA5P012684	0.00124609	0.0125018	6.24048	down	protein_coding	NM_015272	CCDS32447.1	RPGRIP1L	RefSeq	6199	chr16	-	53633817	53737771	TCAGAGTGATGAGACTTCTCCTCCTCCTGAAGATAGGAAGGAAATTTCACCAGAGGTAGA	23322	protein fantom isoform a	4.70889	7.35055
ASHGA5P008192	0.000570356	0.00830032	6.19009	down	protein_coding	ENST00000340790	CCDS46001.1	PALM3	GENCODE	2260	chr19	-	14164178	14169971	GTTTGTTCACACTCCAGTCCCAGCTGCAACTGTTGCAAAGTGCTTCCACAGGTGCCCAGC	342979	paralemmin 3 [Source:HGNC Symbol;Acc:33274]	4.21724	6.8472
ASHGA5P027299	0.00646276	0.0316602	6.18387	down	protein_coding	ENST00000252252	CCDS8828.1	KRT6B	GENCODE	2282	chr12	-	52840434	52845910	CTGCTTTCTCTGCTCTCTTTGCCTTCTTTTGTTCTGTTGAATAAAGCATATTGAGAATGT	3854	keratin 6B [Source:HGNC Symbol;Acc:6444]	5.64035	8.26886
ASHGA5P052887	0.00272655	0.0193422	6.16548	down	protein_coding	NM_025107	CCDS5239.1	MYCT1	RefSeq	3066	chr6	+	153019029	153045715	AGATTCCTGAGTAGGGTGGCTTTTGGTTTTTGTTTCTTTCTTGTCTTGTCTTTTATTGAA	80177	myc target protein 1	3.50741	6.13162
ASHGA5P040173	0.00417424	0.0250611	6.143	down	protein_coding	ENST00000435205	CCDS47146.1	FAM160A1	GENCODE	4576	chr4	+	152330397	152584784	AGATCCATCCATTTTAGAACTCTTCTTCCACACTAGTGAAGACCAAGGCGCTGCCAACTT	729830	"family with sequence similarity 160, member A1 [Source:HGNC Symbol;Acc:34237]"	3.32886	5.9478
ASHGA5P005557	0.00606218	0.0304234	6.13358	down	protein_coding	NM_145003	CCDS6384.1	TSNARE1	RefSeq	1915	chr8	-	143293440	143484543	TCATCATCATCATCGCCACCTCTGTCCGAAAGTGATGCTACCCGTGCATCGGCCGCTGAA	203062	t-SNARE domain-containing protein 1	5.49153	8.10826
ASHGA5P046859	0.0108815	0.0433178	6.10345	down	protein_coding	ENST00000224600	CCDS7218.1	RBP3	GENCODE	4276	chr10	-	48381486	48390991	TTCCTTCCACACTAACGTGCTTGAGGACAACATTGGCTACTTGAGGTTTGACATGTTTGG	5949	"retinol binding protein 3, interstitial [Source:HGNC Symbol;Acc:9921]"	2.37385	4.98348
ASHGA5P040663	0.000662703	0.00888109	6.06384	down	protein_coding	ENST00000509018	CCDS34225.1	RAPGEF6	GENCODE	8357	chr5	-	130759613	130970929	ATTTGCAGCCATTCCATCCTAAACTAGGAGATGTGACTGATGCAGATAGCGAAGCAGATG	51735	Rap guanine nucleotide exchange factor (GEF) 6 [Source:HGNC Symbol;Acc:20655]	4.09402	6.69425
ASHGA5P003318	0.00038571	0.00649459	6.04949	down	protein_coding	ENST00000266110	CCDS48047.1	RAPGEF1	GENCODE	6085	chr9	-	134452156	134612925	ATGGACACAGACTCTCAGCGTTCTCATCTCTCTTCCTTCACCATGAAGCTGATGGACAAA	2889	Rap guanine nucleotide exchange factor (GEF) 1 [Source:HGNC Symbol;Acc:4568]	4.91935	7.51616
ASHGA5P014541	7.67651e-05	0.00243615	6.03028	down	protein_coding	NM_001185062	CCDS55096.1	AQP1	RefSeq	2434	chr7	+	30961118	30965131	ATGCAGTCGGGCATGGGGTGGAATGTTCTGGACTTTTGGCTGGCTGATGGTGTGAACTCG	358	aquaporin-1 isoform 4	3.16649	5.75871
ASHGA5P042432	0.00579209	0.0296801	5.99135	down	protein_coding	ENST00000341495	CCDS34446.1	TREML4	GENCODE	2070	chr6	+	41196061	41206120	TCCCTTTTTTCTCCTCTCCTCCGCTGTCAGAAACAGATCTGGGCTGGAATGGCCTGGGGT	285852	triggering receptor expressed on myeloid cells-like 4 [Source:HGNC Symbol;Acc:30807]	6.96029	9.54317
ASHGA5P042562	0.00339805	0.0220484	5.95304	down	protein_coding	NM_145315	CCDS5067.1	LACE1	RefSeq	2262	chr6	+	108616097	108844251	TCTCTCTTCTGGGTTCCAATAAAGTTTTCCTCTTCCTCTCCTCGTACGGAGTTCAAGATG	246269	lactation elevated protein 1	5.60502	8.17865
ASHGA5P007750	0.00533478	0.0285311	5.83928	down	protein_coding	NM_003672	CCDS769.1	CDC14A	RefSeq	4287	chr1	+	100818022	100985833	TTCTATCCCTTCCCTTCAGTCTGAATATGTTCATTACTAAGGCCTTGCCACTCCAGTGAA	8556	dual specificity protein phosphatase CDC14A isoform 1	6.29868	8.84447
ASHGA5P026883	0.000603059	0.00853244	5.80192	down	protein_coding	NM_001037558	CCDS41729.1	HEPN1	RefSeq	1428	chr11	+	124789145	124790573	ATAAGCCCATCCATCTCTTTTATTCATGAACAGAGACAGAAAGAGTGCTTGGCATGGCAT	641654	putative cancer susceptibility gene HEPN1 protein	3.80376	6.34029
ASHGA5P037481	0.000935579	0.0105312	5.75627	down	protein_coding	NM_005239	CCDS13659.1	ETS2	RefSeq	3784	chr21	+	40177754	40196878	TCTCTCTGCCTCAATAAGCCAACCATGTCTTTCAAGGATTACATCCAAGAGAGGAGTGAC	2114	protein C-ets-2 isoform 1	3.25859	5.78373
ASHGA5P003913	0.000320334	0.00579617	5.74029	down	protein_coding	NM_020776	CCDS45855.1	KIAA1328	RefSeq	4875	chr18	+	34409079	34805288	ATTACAATTGTTTATTGAAGTCAAACTGTGATGGCTGGCTGCTTGGAACATCATCATCTA	57536	uncharacterized protein KIAA1328	3.41463	5.93576
ASHGA5P004296	0.00304962	0.0207248	5.73501	down	protein_coding	NM_178562	CCDS5810.1	TSPAN33	RefSeq	2900	chr7	+	128784711	128809534	AAATACCTGCTCTTCTTCTTCAACATGCTCTTCTGGGTGATTTCCATGGTGATGGTGGCT	340348	tetraspanin-33	3.12237	5.64217
ASHGA5P013330	0.0026297	0.0189722	5.6601	down	protein_coding	NM_001024956	CCDS8435.1	SC5DL	RefSeq	7019	chr11	+	121163576	121184119	AGAGGCTGGCAGGGGCTAAGTGATGGATCTTGTACTCCGTGTTGCAGATTACTATTTTTT	6309	lathosterol oxidase	3.1559	5.65673
ASHGA5P026433	1.88729e-05	0.00112286	5.56806	down	protein_coding	NM_001331	CCDS44607.1	CTNND1	RefSeq	6282	chr11	+	57529233	57586652	TGATTCACCTTCCTTTTTACCCTGCCCTGCGGCGGCTCCGCCCCTTACCTTCATGGACGA	1500	catenin delta-1 isoform 1B	7.30995	9.78713
ASHGA5P014185	0.0032949	0.0216549	5.52752	down	protein_coding	NM_001165038	CCDS55208.1	GFRA2	RefSeq	3061	chr8	-	21549529	21646346	ACATGATCTTGGCAAACGTCTTCTGCCTCTTCTTCTTTCTAGGTGAGGAGTTCTACGAAG	2675	GDNF family receptor alpha-2 isoform b precursor	3.40926	5.87589
ASHGA5P008000	0.00432265	0.0255422	5.51302	down	protein_coding	NM_003973	CCDS33739.1	RPL14	RefSeq	875	chr3	+	40498782	40503863	TTGGGCGGGTCTTCTTCCTTCTCGCCTAACGCCGCCAACATGGTGTTCAGGCGCTTCGTG	9045	60S ribosomal protein L14	3.79082	6.25366
ASHGA5P043635	0.000665854	0.00888998	5.49578	down	protein_coding	ENST00000395891	CCDS5469.2	HECW1	GENCODE	6839	chr7	+	43152197	43602938	GTAAGCCAGCTTCCTTCCCTGAGGCCTGAACATCATCACTACCCAACAATCGATGAGCCT	23072	"HECT, C2 and WW domain containing E3 ubiquitin protein ligase 1 [Source:HGNC Symbol;Acc:22195]"	5.62855	8.08687
ASHGA5P014000	0.000910209	0.0103767	5.48759	down	protein_coding	NM_014709	CCDS42686.1	USP34	RefSeq	11326	chr2	-	61414589	61697849	TCATGGACTGTGTGGCAGCTAGACTGTCTTGCTTGCTTGCTGAAGTTAATATGCCAGTTT	9736	ubiquitin carboxyl-terminal hydrolase 34	4.20321	6.65938
ASHGA5P007402	0.000112536	0.00301684	5.47065	down	protein_coding	NM_024426	CCDS7878.2	WT1	RefSeq	3037	chr11	-	32409321	32457081	AGGTAAAACAAGTGAAAAGCCCTTCAGCTGTCGGTGGCCAAGTTGTCAGAAAAAGTTTGC	7490	Wilms tumor protein isoform D	3.67753	6.12925
ASHGA5P045645	0.00181967	0.0154604	5.45798	down	protein_coding	ENST00000366474	CCDS31115.1	OR2T1	GENCODE	1110	chr1	+	248569295	248570405	TGTATGTGTGCTGTGTTTTGATGCTGCTGATTCCTTTCTCTGTAGTCCTTGCTTCCTATG	26696	"olfactory receptor, family 2, subfamily T, member 1 [Source:HGNC Symbol;Acc:8277]"	3.99373	6.4421
ASHGA5P048512	0.00135528	0.0129514	5.33392	down	protein_coding	NM_001981	CCDS557.1	EPS15	RefSeq	5220	chr1	-	51819934	51984995	ATTGATCCTCCTCACGTTCTTACTCCTGAAATGATTCCACCATCAGACAGGGCCAGTTTA	2060	epidermal growth factor receptor substrate 15 isoform A	5.5862	8.00139
ASHGA5P049237	0.00267542	0.019173	5.33383	down	protein_coding	ENST00000332374	CCDS10767.1	MT1H	GENCODE	397	chr16	+	56703725	56705041	GTTCCACTGCCTCTTCTCTTCTCGCTTGGGAACTCCAGTCTCACCTCGGCTTGCAATGGA	4496	metallothionein 1H [Source:HGNC Symbol;Acc:7400]	5.95486	8.37003
ASHGA5P005956	0.00331197	0.0217531	5.33187	down	protein_coding	NM_001093728	CCDS47413.1	TCP11	RefSeq	1941	chr6	-	35085848	35109187	CCCCCTCCCTTTCTTTCTGTCACAGGTCTGACAGAAACCGTTAATGAAGTTTCCAAGCTG	6954	T-complex protein 11 homolog isoform 1	10.2152	12.6298
ASHGA5P012224	0.0283798	0.0770741	5.31858	down	protein_coding	NM_001954	CCDS4690.1	DDR1	RefSeq	3840	chr6	+	30851860	30867933	AATGGCTCTGCCTACAGTGGGGACTATATGGAGCCTGAGAAGCCAGGCGCCCCGCTTCTG	780	epithelial discoidin domain-containing receptor 1 isoform 1 precursor	4.64587	7.05691
ASHGA5P051441	0.000284848	0.00533408	5.27421	down	protein_coding	NM_138410	CCDS33730.1	CMTM7	RefSeq	1369	chr3	+	32433162	32496333	TCCTCCTCATCGCCTCCATTGTGGCAGCTTCCAAGAGTTACAACCAGAGCGGACTGGTAG	112616	CKLF-like MARVEL transmembrane domain-containing protein 7 isoform a	5.2963	7.69525
ASHGA5P010423	0.00877095	0.0379082	5.22378	down	protein_coding	NM_006589	CCDS1103.1	FAM189B	RefSeq	3209	chr1	-	155216995	155225274	CACTCTAGTGATCTCCTTCTTCTCCTTGCTTTCGGTGCTCTGTGTCATGCTTAGCATGGC	10712	protein FAM189B isoform a	5.43565	7.82074
ASHGA5P052922	0.00533344	0.0285311	5.19742	down	protein_coding	NM_001129895		HGC6.3	RefSeq	1016	chr6	-	168376603	168377619	CCTCCTCCCAACACACTGCAGGGGGAATGACCCCCACTGTCTTCTCCTCCCAACACACTG	100128124	uncharacterized protein LOC100128124	7.21376	9.59156
ASHGA5P055193	0.000528715	0.0078628	5.17525	down	protein_coding	NM_174926	CCDS8432.1	TMEM136	RefSeq	4105	chr11	+	120195837	120204388	TTGTTTTTCTGGTTTTGGTCTTTTCATCACAGGATGGCATTAGCTCTGTGTCTGCAGGTG	219902	transmembrane protein 136 isoform b	2.84251	5.21413
ASHGA5P050528	0.0131482	0.0489103	5.16967	down	protein_coding	NM_001135041	CCDS46342.1	DCTN1	RefSeq	4166	chr2	-	74588280	74601862	TCCTCTCCTTGCTTTCTTTGGTTTTCTGCAATGATGAGACAGGCACCGACAGCCCGAAAG	1639	dynactin subunit 1 isoform 4	4.53509	6.90516
ASHGA5P003362	0.00561406	0.0292235	5.13834	down	protein_coding	NM_024068	CCDS8911.1	NABP2	RefSeq	1404	chr12	+	56618124	56623638	GCTGGCTTGGTGGGGTGCCGAGGCTCAGGCAGCATGACGACGGAGACCTTTGTGAAGGAT	79035	SOSS complex subunit B1	4.66644	7.02775
ASHGA5P012582	0.00117336	0.0120252	5.13336	down	protein_coding	NM_031244	CCDS4527.1	SIRT5	RefSeq	2426	chr6	+	13574760	13605970	CCCAGCTACGAACAGATTCAGTCATTTGATCTCCATCTCATCTCTAATTATTATAAAGAA	23408	"NAD-dependent protein deacylase sirtuin-5, mitochondrial isoform 2"	3.11234	5.47224
ASHGA5P055582	2.02756e-05	0.0011539	5.08831	down	protein_coding	NM_213611	CCDS9065.1	SLC25A3	RefSeq	1919	chr12	+	98987402	98995778	TGTCCTCTAACCGTCGCTCCCTCCTCCCCTAGAAAGATGTTCTCGTCCGTGGCGCACCTG	5250	"phosphate carrier protein, mitochondrial isoform b precursor"	9.82482	12.172
ASHGA5P010819	0.00163532	0.0145248	5.07796	down	protein_coding	NM_020318	CCDS41438.1	PAPPA2	RefSeq	6940	chr1	+	176432306	176811970	GTCATGTGAGCCCTTCCAAGCAGATGGTTGGTGTGACACTATCAACAACCGAGCCTACTG	60676	pappalysin-2 isoform 1 precursor	3.7554	6.09965
ASHGA5P041465	0.000856814	0.0100286	5.06386	down	protein_coding	NM_014945	CCDS4294.1	ABLIM3	RefSeq	4335	chr5	+	148521053	148639999	TAGCCAGTTAGATGTGAGGTCCTCCACTCCAACCTCTTACCAGGCTCCCAAGCACTTTCA	22885	actin-binding LIM protein 3	5.68094	8.02118
ASHGA5P035266	0.00361097	0.0228478	5.04988	down	protein_coding	NM_182528	CCDS42737.1	C1QL2	RefSeq	2049	chr2	-	119913818	119916471	ATCACTATGACCCCACCACGGGCAAGTTCAGCTGCCAGGTACGCGGCATCTACTTCTTCA	165257	complement C1q-like protein 2 precursor	6.09894	8.43519
ASHGA5P047276	0.00124478	0.0125018	5.04938	down	protein_coding	NM_001098844	CCDS41492.1	TMEM236	RefSeq	5464	chr10	+	18041217	18089854	CAATGCATCTCTCTCTTCATCAATCAACGCTGCAGGTGCTTACAAGACTTATAACTTAAA	653567	transmembrane protein 236	2.78657	5.12267
ASHGA5P009746	0.00124524	0.0125018	5.03395	down	protein_coding	NM_006888	CCDS9892.1	CALM1	RefSeq	4268	chr14	+	90863326	90874619	TCTGCTCTTCCTCCCTTCGCTCGCACCATGGCTGATCAGCTGACCGAAGAACAGATTGCT	801	calmodulin	7.59258	9.92427
ASHGA5P007819	0.000374546	0.00639112	4.99256	down	protein_coding	NM_004887	CCDS4188.1	CXCL14	RefSeq	1989	chr5	-	134906370	134914969	AAGATGGTTATCATCACCACCAAGAGCGTGTCCAGGTACCGAGGTCAGGAGCACTGCCTG	9547	C-X-C motif chemokine 14 precursor	3.13946	5.45924
ASHGA5P040900	0.000178874	0.00406672	4.93986	down	protein_coding	NM_144697	CCDS949.1	C1orf51	RefSeq	1758	chr1	+	150255228	150259501	TCCCACCTCCCCAGTGAACAGTGACTTTGGCTTCCCCTCTGATAGTGAGAGGGAGGACAA	148523	uncharacterized protein C1orf51	7.4283	9.73277
ASHGA5P051823	0.00553108	0.0290127	4.91309	down	protein_coding	NM_001167931	CCDS54696.1	IL1RAP	RefSeq	2930	chr3	+	190231839	190374986	TATCCTATAATTACTGTGTGTGGTGGGTGGTGGCTACTATCTCTACCAACCCTCTGTATG	3556	interleukin-1 receptor accessory protein isoform 3 precursor	4.42958	6.72621
ASHGA5P045705	1.00995e-05	0.0007062	4.89359	down	protein_coding	NM_016446	CCDS6595.1	TMEM8B	RefSeq	2173	chr9	+	35829221	35847232	GACACATTGGAGTAAATGAACAAAACTGTTTGCAACTTAATAAAGTAAGTTTGGGCCTCC	51754	transmembrane protein 8B isoform b	5.2626	7.55349
ASHGA5P026248	0.00185505	0.0156436	4.88904	down	protein_coding	NM_147193	CCDS582.1	GLIS1	RefSeq	2816	chr1	-	53971905	54199877	AGTTTCCACTCCATCCAGAGTTGCTTCCCCTATGGCGACTGCTACCGGATGGCTGAACCA	148979	zinc finger protein GLIS1	6.94215	9.2317
ASHGA5P004541	0.00148676	0.0137189	4.88543	down	protein_coding	NM_152492	CCDS50.1	CCDC27	RefSeq	2174	chr1	+	3668964	3688209	GAACGTGGACGGGTACCTCCTTCCCTTCAGTAAGAGCATCTGCGAGTTCGATTACTTGCG	148870	coiled-coil domain-containing protein 27	5.1947	7.48319
ASHGA5P030572	0.00814818	0.0361837	4.87872	down	protein_coding	NM_001005279	CCDS30902.1	OR6K2	RefSeq	975	chr1	-	158669467	158670442	CTCCCTTCTTCAACCCCATTATCTATAGCCTGAGGAATAAAGAAATAAAAGAAGCTATAA	81448	olfactory receptor 6K2	4.85731	7.14381
ASHGA5P031074	0.00799617	0.0356955	4.86009	down	protein_coding	NM_003609	CCDS10664.1	HIRIP3	RefSeq	3065	chr16	-	30003641	30007417	AGGAAAGGCAGGACACGAAGCTCCTCTTCCTCCTCAGATGGAAGTCCAGAGGCCAAAGGA	8479	HIRA-interacting protein 3 isoform 1	5.2244	7.50538
ASHGA5P006381	0.00712708	0.0333994	4.85337	down	protein_coding	NM_139211	CCDS3507.1	HOPX	RefSeq	1154	chr4	-	57514153	57522688	TCAAAATCACCCCCGCGCTTCCTTCACTCCTTCCTTAGAGCCGGAGCGCGCAGGGACCAT	84525	homeodomain-only protein isoform b	7.17248	9.45147
ASHGA5P008142	0.000740304	0.0093683	4.84697	down	protein_coding	NM_001015050	CCDS33840.1	ALG1L	RefSeq	833	chr3	-	125648117	125655887	GGCTGGACAGAGTTTGAACAACTTACTCTTGATGGACACAACCTTCCTTCTCTTGTCTGT	200810	putative glycosyltransferase ALG1-like isoform 2	3.16528	5.44236
ASHGA5P035115	0.0175884	0.0581919	4.81864	down	protein_coding	ENST00000394003	CCDS54369.1	DCTN1	GENCODE	4479	chr2	-	74588280	74607482	TTTTCTCTCTGTCTTTGGCCAGCTGGGGGAGGGGGTAGAGGCCGGGTGAGCAACATGGCA	1639	dynactin 1 [Source:HGNC Symbol;Acc:2711]	5.22648	7.49511
ASHGA5P054559	0.00637707	0.031444	4.81074	down	protein_coding	NM_001308	CCDS7486.1	CPN1	RefSeq	1756	chr10	-	101802064	101841642	GCAAGATGTCAGACCTGCTCTCAGTCTTCCTCCACCTCCTCCTTCTCTTCAAGTTGGTTG	1369	carboxypeptidase N catalytic chain precursor	7.81521	10.0815
ASHGA5P008743	0.00153655	0.0140133	4.79032	down	protein_coding	ENST00000346541	CCDS13221.1	CBFA2T2	GENCODE	7737	chr20	+	32150170	32237837	AAGCTTGAAAGAAATACAGGTCCTGGCAAGGCAATGGAAAGTTGGTCCTGAGAAAAGGGT	9139	"core-binding factor, runt domain, alpha subunit 2; translocated to, 2 [Source:HGNC Symbol;Acc:1536]"	2.62043	4.88055
ASHGA5P050012	0.000270049	0.00516183	4.78471	down	protein_coding	NM_002639	CCDS32839.1	SERPINB5	RefSeq	2633	chr18	+	61144143	61172318	CCAATGCCAAGGTCAAACTCTCCATTCCAAAATTTAAGGTGGAAAAGATGATTGATCCCA	5268	serpin B5	3.31207	5.5705
ASHGA5P005281	0.000245963	0.00498136	4.76315	down	protein_coding	NM_001660	CCDS2884.1	ARF4	RefSeq	1758	chr3	-	57557089	57583215	GTCACCACCATTCCTACCATTGGTTTTAATGTGGAAACAGTAGAATATAAGAACATTTGT	378	ADP-ribosylation factor 4	4.27651	6.52843
ASHGA5P002609	0.00312345	0.0209747	4.75307	down	protein_coding	NM_199039	CCDS3449.1	KLHL5	RefSeq	7545	chr4	+	39063851	39127853	GTTCATGCAGATTGGTGCTCTCCTCTGTCTCAGACTATTTTGCTGCCATGTTTACTAATG	51088	kelch-like protein 5 isoform 2	4.8454	7.09426
ASHGA5P006660	0.00291403	0.020135	4.74769	down	protein_coding	NM_004204	CCDS10412.1	PIGQ	RefSeq	2993	chr16	+	619967	634136	AGGCTGGCGGCTGGCGTGAAGTTCCGTGTCCTCCGGCACGAGGCCGGCAGGCCCCTCCGC	9091	phosphatidylinositol N-acetylglucosaminyltransferase subunit Q isoform 2	5.56476	7.81199
ASHGA5P034443	0.0211725	0.0651613	4.73787	down	protein_coding	ENST00000305625	CCDS12209.1	MBD3L1	GENCODE	748	chr19	+	8953268	8954016	ATAGTGCAGATGAAATAAAGTGTAATCCTTTATTAACATCTCTTTGCAGTGTCCCCAATG	85509	methyl-CpG binding domain protein 3-like 1 [Source:HGNC Symbol;Acc:15774]	3.36386	5.60809
ASHGA5P013530	0.00509175	0.0279319	4.72474	down	protein_coding	NM_001039372	CCDS43616.1	HEPACAM2	RefSeq	2092	chr7	-	92817899	92855782	ATACCTCCTTCTCTTCGGTGCTTGCTCGGGGCTGAAGGTGACAGTGCCATCACACACTGT	253012	HEPACAM family member 2 isoform 1 precursor	4.38365	6.62389
ASHGA5P034340	0.00512526	0.0279728	4.70545	down	protein_coding	NM_198988	CCDS12895.2	LENG9	RefSeq	1930	chr19	-	54972978	54974894	TCTCTTTCTCTCTTTAATTTTGGTTTCTCTCAAGCTTCCAAATGGTGCTCAGTGCTCCAA	94059	leukocyte receptor cluster member 9	6.07158	8.30591
ASHGA5P008092	0.00368002	0.0230671	4.69141	down	protein_coding	NM_178177	CCDS3111.1	NMNAT3	RefSeq	1919	chr3	-	139279022	139396885	AATTAATAAGGAATGTACCAGGTCATCCAGGGTATCATCTCTCCTGTCAACGACACCTAT	349565	nicotinamide mononucleotide adenylyltransferase 3 isoform 1	3.50493	5.73495
ASHGA5P054838	0.00912773	0.0388893	4.68271	down	protein_coding	NM_001193473	CCDS53626.1	FOLH1	RefSeq	2266	chr11	-	49168186	49230222	TCTCCTGGAGGCAGATGTTGCCTCTCTCTCTCGCTCGGATTGGTTCAGTGCACTCTAGAA	2346	glutamate carboxypeptidase 2 isoform 5	6.35922	8.58656
ASHGA5P012010	0.00608298	0.0304958	4.62628	down	protein_coding	NM_005216	CCDS212.1	DDOST	RefSeq	2144	chr1	-	20978259	20988037	AATCTCATCATTTTCTCCCCTTCGGTAGAAGATTTTGGAGGCAACATCAACGTGGAGACC	1650	dolichyl-diphosphooligosaccharide--protein glycosyltransferase 48 kDa subunit precursor	3.76124	5.97109
ASHGA5P039971	0.00112969	0.0117791	4.61569	down	protein_coding	ENST00000304915	CCDS3540.1	SMR3B	GENCODE	785	chr4	+	71248794	71255961	GGTCCAGGGAGAATCCCACCTCCTCCTCCCGCACCCTATGGTCCAGGGATATTTCCACCA	10879	submaxillary gland androgen regulated protein 3B [Source:HGNC Symbol;Acc:17326]	9.11237	11.3189
ASHGA5P042366	0.00544756	0.028846	4.61424	down	protein_coding	NM_000594	CCDS4702.1	TNF	RefSeq	1686	chr6	+	31543343	31546112	TCCTTCCTGATCGTGGCAGGCGCCACCACGCTCTTCTGCCTGCTGCACTTTGGAGTGATC	7124	tumor necrosis factor	4.08954	6.29563
ASHGA5P006755	0.00438434	0.0257722	4.60565	down	protein_coding	NM_000972	CCDS6965.1	RPL7A	RefSeq	890	chr9	+	136215068	136218280	TTTCTCTCTCCTCCCGCCGCCCAAGATGCCGAAAGGAAAGAAGGCCAAGGGAAAGAAGGT	6130	60S ribosomal protein L7a	7.88422	10.0876
ASHGA5P029170	4.17745e-05	0.00176487	4.60488	down	protein_coding	NM_017420	CCDS9749.2	SIX4	RefSeq	6277	chr14	-	61176255	61190852	AAAGAGTGCGAGGGAGTGAGGGAGGGAGGAAAATAAACAACAAAAAATGTCCTCTTCCTC	51804	homeobox protein SIX4	2.70332	4.90648
ASHGA5P046724	0.00184718	0.0156289	4.57848	down	protein_coding	NM_014370	CCDS35441.1	SRPK3	RefSeq	2014	chrX	+	153046455	153051187	CCTCTTCCTCCCCCGCCCCAGGGGGCGGCCGTAGCCTCAGCGCGGGCTCACAGACCTCAG	26576	SRSF protein kinase 3 isoform 1	7.47557	9.67044
ASHGA5P034960	0.000781251	0.0096468	4.55852	down	protein_coding	NM_001145122	CCDS46254.1	CAPN14	RefSeq	3841	chr2	-	31395921	31440411	TGTCTCCTCCACCTATAAGAACTTGTTCTGGGGAGCACTTCTGGAAAAGGCCTATGCCAA	440854	calpain-14	2.6832	4.87177
ASHGA5P028400	0.000488286	0.00752696	4.5574	down	protein_coding	NM_025215	CCDS9275.2	PUS1	RefSeq	2014	chr12	+	132413812	132428406	TCAGGGGTCGGGGATCAGGGCGGGGTCGGGTGCACTGGTAGCCTGCGCATGGGCCTCCAG	80324	"tRNA pseudouridine synthase A, mitochondrial isoform 1"	4.21316	6.40137
ASHGA5P035044	0.00459322	0.0264039	4.52284	down	protein_coding	NM_001122964	CCDS46289.1	SMEK2	RefSeq	4470	chr2	-	55775513	55844796	ATTACAGATATAGTTGGAGTTTCATATGTACCCCTTCACATTCCCATTCCCATTCTACCC	57223	serine/threonine-protein phosphatase 4 regulatory subunit 3B isoform 1	8.18767	10.3649
ASHGA5P005913	0.000704652	0.00913268	4.46866	down	protein_coding	ENST00000311303	CCDS10730.1	ABCC12	GENCODE	5168	chr16	-	48116883	48180681	GCATCACCTATCACCTCCTCTACTTTAACTGTGCTCTCAGGTGGTTTGCGCTGAGAATGG	94160	"ATP-binding cassette, sub-family C (CFTR/MRP), member 12 [Source:HGNC Symbol;Acc:14640]"	4.49691	6.65675
ASHGA5P050058	0.002645	0.0190421	4.46192	down	protein_coding	NM_182919	CCDS12136.1	TICAM1	RefSeq	2727	chr19	-	4815935	4831754	ACCTGTGCCCATGGCCTGCACAGGCCCATCACTTCCTAGCGCCTTCGACATTCTAGGTGC	148022	TIR domain-containing adapter molecule 1	4.8529	7.01057
ASHGA5P054576	0.00795559	0.0355923	4.42519	down	protein_coding	NM_031271	CCDS6080.1	TEX15	RefSeq	10155	chr8	-	30689059	30706533	AATTCTGCCTCCTCCTCAGAAGTTGTCCCTGGTGATTGTGCTGTTCTTACTAATGGTTTG	56154	testis-expressed sequence 15 protein	6.53105	8.67679
ASHGA5P007036	0.000200689	0.00433723	4.40686	down	protein_coding	NM_138643	CCDS11883.1	CABYR	RefSeq	1153	chr18	+	21718954	21741564	TCAGATGTTAGCAATGGCAACAAGTGAACGAGGACAACCACCACCATGTTCTAACATGTG	26256	calcium-binding tyrosine phosphorylation-regulated protein isoform d	3.26504	5.40479
ASHGA5P012493	2.39596e-05	0.0012588	4.39875	down	protein_coding	NM_001033582	CCDS41229.1	PRKCZ	RefSeq	2044	chr1	+	2036154	2116834	ATAGACTGGGACTTGCTGGAGAAGAAGCAGGCGCTCCCTCCATTCCAGCCACAGATCACA	5590	protein kinase C zeta type isoform 2	5.57152	7.70861
ASHGA5P007493	0.00411811	0.0248085	4.39853	down	protein_coding	NM_001001713	CCDS33560.1	SH3BGR	RefSeq	1017	chr21	+	40817796	40887433	ATTATTTATTCCTTCCTTGGTTTGGCTCCTCCTCCAGACTCAAAGGGATCAGAGAAGGCT	6450	SH3 domain-binding glutamic acid-rich protein isoform b	5.68818	7.8252
ASHGA5P036594	0.0024092	0.0179799	4.37961	down	protein_coding	NM_001037732	CCDS33430.1	DEFB128	RefSeq	282	chr20	-	168526	170264	AAGCTGAGTGTGCTGCAGGATTACATCATCTTACCCACCATCACCATTTTCACAGTCTAA	245939	beta-defensin 128 precursor	4.71569	6.8465
ASHGA5P006214	0.00169311	0.0148069	4.35987	down	protein_coding	NM_198057	CCDS14530.1	TSC22D3	RefSeq	2312	chrX	-	106956451	107019017	ATCGACCAGACCATGCTCTCCATCCTGCTCTTCTTCCACAGTGCCTCCGGAGCCAGCGTG	1831	TSC22 domain family protein 3 isoform 1	6.87162	8.99591
ASHGA5P045491	0.0148248	0.0525106	4.33233	down	protein_coding	NM_001131016	CCDS6894.1	CIZ1	RefSeq	3016	chr9	-	130928343	130953868	CCCCCAAGGCAGGTGCAGCTGCAGCTGCAGAAGCAGGTCCAGACACAGACATATCCACAG	25792	cip1-interacting zinc finger protein isoform 1	2.87581	4.99095
ASHGA5P049557	0.000186308	0.00414392	4.28855	down	protein_coding	NM_000382	CCDS11210.1	ALDH3A2	RefSeq	3702	chr17	+	19552063	19580908	CCCGCCTCCCACTCCCCAGCGCCCCCGGACCGTGCAGTTCTCTGCAGGACCAGGCCATGG	224	fatty aldehyde dehydrogenase isoform 2	10.1666	12.2671
ASHGA5P045118	0.0045071	0.0261468	4.28831	down	protein_coding	NM_024896	CCDS34983.1	ERMP1	RefSeq	5355	chr9	-	5784571	5833081	CCTGATGTTGTGCTGGCATCCATTTTGGCTGGCTGTACAATGATTCTCTCGTCCTATTTT	79956	endoplasmic reticulum metallopeptidase 1	4.27801	6.37842
ASHGA5P053669	0.00590477	0.029986	4.2618	down	protein_coding	NM_001040411	CCDS47962.1	C9orf131	RefSeq	3198	chr9	+	35041101	35045988	AAGTGGTCTGTTTGTTCTTCTGTCTTCTTCAACAAGCTTGCCTTCCTACCTAGGTCCAAC	138724	uncharacterized protein C9orf131 isoform C	3.77112	5.86258
ASHGA5P036635	0.00150151	0.0137925	4.21736	down	protein_coding	ENST00000217289	CCDS13098.1	FERMT1	GENCODE	5151	chr20	-	6055491	6104191	TATATATGACCCCATCAATGGAACACCAGCATCATCCACCATGACTTGGTTCAGTGACAG	55612	fermitin family member 1 [Source:HGNC Symbol;Acc:15889]	5.12911	7.20545
ASHGA5P020378	0.0249795	0.0721092	4.20357	down	protein_coding	NM_001167741	CCDS54872.1	MTX3	RefSeq	7882	chr5	-	79272538	79287088	GGTGGTGATGGCGATGTACCAATTTTGACAACTGAAGACGACATGGTTTCTCAGCCAGCA	345778	metaxin-3 isoform 1	3.64765	5.71926
ASHGA5P004687	0.017211	0.0574281	4.18848	down	protein_coding	NM_001142646	CCDS46899.1	TPRA1	RefSeq	1743	chr3	-	127291911	127309568	AGCTCCTGCTTCTTCTTCCTGCTGTGTAGATGCCACAACCTTCCTGTACTTCAGCTTCTT	131601	transmembrane protein adipocyte-associated 1 isoform 2	5.7774	7.84382
ASHGA5P054147	0.0146899	0.0521597	4.18749	down	protein_coding	NM_005462	CCDS35417.1	MAGEC1	RefSeq	4337	chrX	+	140991641	140997187	CGAGTTCCTTCTTCTCCTCTGCTTTATTGAGTATTTTCCAGAGTTCCCCTGAGAGTACTC	9947	melanoma-associated antigen C1	5.78143	7.84752
ASHGA5P032406	0.00703613	0.0330919	4.15912	down	protein_coding	NM_031854	CCDS32649.1	KRTAP4-12	RefSeq	1077	chr17	-	39279344	39280419	CTTGAAGTCCAGTGAAGTCTCTCTCTTAAAGTCTTTTGCAAACATTTTTGTACCTTGTTA	83755	keratin-associated protein 4-12	2.93277	4.98905
ASHGA5P048858	0.000634173	0.00874927	4.15659	down	protein_coding	NM_001267536		GOLGA6L4	RefSeq	4155	chr15	+	84904524	84914120	GGAGAACAGGGAGCTAAACATCACCATCATCTAAGAGCGGGTCAAGGAATTGAAAAAAAA	643707	putative golgin subfamily A member 6-like protein 4	5.65225	7.70765
ASHGA5P054710	0.0053504	0.0285663	4.15221	down	protein_coding	NM_003754	CCDS7785.1	EIF3F	RefSeq	1274	chr11	+	8008866	8017719	ATTTCCGCTTCCGCCTCCTTCTTTCTCGACAAGATGGCCACACCGGCGGTACCAGTAAGT	8665	eukaryotic translation initiation factor 3 subunit F	5.86704	7.92092
ASHGA5P051949	0.00512665	0.0279728	4.13645	down	protein_coding	NM_133267	CCDS3494.1	GSX2	RefSeq	1212	chr4	+	54966247	54968122	TTGCCCGCGGGTGAACCATGCGCATCATCACCACCACCCGCCGCAGCACCACCATCACCA	170825	GS homeobox 2	6.48472	8.53311
ASHGA5P008915	0.000642481	0.00880855	4.09474	down	protein_coding	NM_171825	CCDS43386.1	CAMK2A	RefSeq	4885	chr5	-	149599053	149669403	ATGGTGTGAAGGAATCCTCAGAGAGCACCAACACCACCATCGAGGATGAAGACACCAAAG	815	calcium/calmodulin-dependent protein kinase type II subunit alpha isoform 2	4.07752	6.11129
ASHGA5P041042	7.11775e-05	0.00235459	4.07415	down	protein_coding	NM_002185	CCDS3911.1	IL7R	RefSeq	4617	chr5	+	35856976	35879705	ATTTTGAGTTTTTTCTCTGTCGCTCTGTTGGTCATCTTGGCCTGTGTGTTATGGAAAAAA	3575	interleukin-7 receptor subunit alpha precursor	5.271	7.2975
ASHGA5P030197	0.00104437	0.0111754	4.06913	down	protein_coding	NM_001164465	CCDS45325.1	GOLGA6L10	RefSeq	3548	chr15	-	83009406	83018198	GCGGAGAACAGGGAGCTAAACATCACCATCATCTAAGAGCGGGTCAAGAAATTGAAAAAA	647042	putative golgin subfamily A member 6-like protein 10	5.5622	7.58692
ASHGA5P050810	2.94787e-05	0.00138677	4.04866	down	protein_coding	NM_002181	CCDS33380.1	IHH	RefSeq	2074	chr2	-	219919141	219925238	CTCCCCGGCCATGTCTCCCGCCCGGCTCCGGCCCCGACTGCACTTCTGCCTGGTCCTGTT	3549	indian hedgehog protein precursor	8.36181	10.3793
ASHGA5P035485	2.65462e-05	0.00134931	4.01973	down	protein_coding	NM_022353	CCDS46472.1	OSGEPL1	RefSeq	2339	chr2	-	190611385	190627924	AAGACTACGTGCTGGCTTGGGCATTTTACATGACATAGAAGGCATCCGCTATGAACCAAA	64172	probable tRNA threonylcarbamoyladenosine biosynthesis protein OSGEPL1	3.94445	5.95155
ASHGA5P004421	7.95366e-05	0.00250848	4.01502	down	protein_coding	NM_003283	CCDS12917.1	TNNT1	RefSeq	1059	chr19	-	55644160	55660606	AACAGCTCCGGGCCCGGTCTGCCTGGCTGCCTCCATCACAGCCCTCCTGCCCTGCCAGGG	7138	"troponin T, slow skeletal muscle isoform a"	6.86411	8.86952
ASHGA5P041417	0.00013472	0.0034139	4.01062	down	protein_coding	ENST00000394633	CCDS54912.1	PCDHA1	GENCODE	4468	chr5	+	140165875	140391929	GTAAATGATAATGCTCCAGAACTGGCGGTCACTTCATTGTATTTGCCTATCAGAGAGGAC	56147	protocadherin alpha 1 [Source:HGNC Symbol;Acc:8663]	2.65465	4.65848
ASHGA5P052549	0.00171294	0.0149143	3.99811	down	protein_coding	NM_203297	CCDS43414.1	TRIM7	RefSeq	3026	chr5	-	180620923	180627930	TCAAGTCCCTCTCCAACTTCTCCTCCTGGGACAGAAACAGATGGCAGCGGAGCAGGAGAA	81786	tripartite motif-containing protein 7 isoform 2	5.29225	7.29157
ASHGA5P027603	0.00402704	0.0244478	3.99655	down	protein_coding	ENST00000526441	CCDS41840.1	TBX5	GENCODE	1050	chr12	-	114803901	114841703	AGTGTGATCACCCCTGGTCAATTTGCTTTCTTTCTTACCTTTTCCTTTCCTTGGGTTGGG	6910	T-box 5 [Source:HGNC Symbol;Acc:11604]	4.40255	6.4013
ASHGA5P047845	0.00458304	0.0264039	3.99237	down	protein_coding	NM_001005238	CCDS31365.1	OR51G2	RefSeq	945	chr11	-	4935948	4936893	GTATCTTCTCTTTCCTCCTGTGATGAATCCCATTGTCTACAGTGTGAAGACCAAACAGAT	81282	olfactory receptor 51G2	4.0671	6.06435
ASHGA5P012944	0.00329251	0.0216549	3.98893	down	protein_coding	NM_001145841	CCDS53594.1	TNNI2	RefSeq	707	chr11	+	1861431	1862910	TGTCACACACCACACAGCACCATGTCCCAGTGCAAGAAGCGGAACAGGGCCATCACGGCC	7136	"troponin I, fast skeletal muscle isoform 2"	5.8663	7.86231
ASHGA5P005868	0.00837777	0.0368134	3.91035	down	protein_coding	NM_003183	CCDS1665.1	ADAM17	RefSeq	3572	chr2	-	9629410	9695917	AGTATGAATCTCTGTCTCTGTTTCACCCCAGTAACGTCGAAATGCTGAGCAGCATGGATT	6868	disintegrin and metalloproteinase domain-containing protein 17 preproprotein	6.03455	8.00184
ASHGA5P045805	0.0155511	0.0539576	3.89433	down	protein_coding	NM_178828	CCDS6676.1	FAM75E1	RefSeq	4471	chr9	+	90497771	90503814	ACCAGTGTGTGTGGCCTAGTGCTCCTCTTCCTATTGCTCCTCTACGTCCACAGTGACCCA	286234	protein FAM75E1	5.69442	7.6558
ASHGA5P011092	0.00025509	0.00503605	3.89019	down	protein_coding	NM_006720	CCDS31289.1	ABLIM1	RefSeq	6850	chr10	-	116190868	116286685	ACGTCCCGCTCTCCCCAGCATTTCCACAGACCTGATCAAGGAATCAACATTTACCGAAAG	3983	actin-binding LIM protein 1 isoform s	6.83159	8.79143
ASHGA5P052811	0.00577702	0.0296625	3.84485	down	protein_coding	NM_175768	CCDS5049.1	GRIK2	RefSeq	4679	chr6	+	101846860	102517958	GCCACCATACCATCCAGACACTGTTTAGTAATCTTTTGAAACTTACTAAAAGAGGTTTTT	2898	"glutamate receptor, ionotropic kainate 2 isoform 2 precursor"	3.52913	5.47205
ASHGA5P008988	0.00847446	0.0370671	3.83558	down	protein_coding	NM_138297	CCDS3311.1	MUC4	RefSeq	3958	chr3	-	195473637	195538844	TGTGTCTCTGCCTCCTTCCGCATGTGGTCCCAGGAGTTTCCCTCTTCCCCTATGGGGCAG	4585	mucin-4 isoform e precursor	7.38263	9.32208
ASHGA5P033356	0.0330711	0.0838965	3.82459	down	protein_coding	NM_175738	CCDS11703.1	RAB37	RefSeq	3091	chr17	+	72667255	72743474	TGGGAAAGACGTCTCTGCTGGTTCAGTTCGATCAGGGCAAGTTCATCCCCGGCTCCTTCT	326624	ras-related protein Rab-37 isoform 3	4.52165	6.45696
ASHGA5P055944	0.0149826	0.0528489	3.82137	down	protein_coding	NM_001136022	CCDS45089.1	NFATC4	RefSeq	5672	chr14	+	24836144	24848810	CTGGAGGAAGGTGGGTGTGGGACTGGGGGCTGTGAGTGTGAGTGTGTGCAAGAGATTGCT	4776	"nuclear factor of activated T-cells, cytoplasmic 4 isoform 1"	5.89619	7.83028
ASHGA5P032112	0.00383143	0.0236376	3.81822	down	protein_coding	NM_000080	CCDS11058.1	CHRNE	RefSeq	2460	chr17	-	4801063	4806369	ATCACCATCTCTTCAACAACTATGACCCAGGAAGCCGGCCAGTGCGGGAGCCTGAGGATA	1145	acetylcholine receptor subunit epsilon precursor	4.13617	6.06907
ASHGA5P007650	0.00975989	0.0404492	3.80473	down	protein_coding	NM_198276	CCDS1871.1	TMEM17	RefSeq	1925	chr2	-	62727355	62733604	ACAGGAGAAGGTTCCTGAGTTGGCTGGCTTTTGGCTTTTGAGCCTTCTATTGCAGTTACC	200728	transmembrane protein 17	4.57056	6.49836
ASHGA5P042410	0.00943097	0.0396178	3.80426	down	protein_coding	ENST00000394571	CCDS54997.1	PNPLA1	GENCODE	2478	chr6	+	36238236	36276372	TCACTCCATCTCCTTCTCGGGCAGTGGATTCCTCTCCTTCTACCAGGCGGGGGCTGTGGA	285848	patatin-like phospholipase domain containing 1 [Source:HGNC Symbol;Acc:21246]	8.29993	10.2276
ASHGA5P001326	0.0292425	0.0782747	3.79986	down	protein_coding	NM_133504	CCDS9040.1	DCN	RefSeq	1570	chr12	-	91539034	91572329	TCTGATTTGGAACTGGGCACCAATCCGCTGAAGAGCTCAGGAATTGAAAATGGGGCTTTC	1634	decorin isoform b precursor	5.61957	7.54551
ASHGA5P004309	9.0275e-07	0.000169142	3.77741	down	protein_coding	NM_020478	CCDS6122.1	ANK1	RefSeq	3304	chr8	-	41510743	41522804	AAACAGTGACCCCGAGCCGCTCTCCTTGGAGTAGCCTCTCGGGAGGATCACACCTCGACA	286	ankyrin-1 isoform 5 precursor	3.72751	5.6449
ASHGA5P050680	0.0124961	0.0473931	3.77481	down	protein_coding	NM_000726	CCDS46426.1	CACNB4	RefSeq	7979	chr2	-	152689285	152955593	GGCCATGCGGCGGCTCTGAACGATGTCCTCCTCCTCCTACGCCAAGAACGGGACCGCGGA	785	voltage-dependent L-type calcium channel subunit beta-4 isoform b	7.6672	9.58361
ASHGA5P041751	0.000603979	0.00853361	3.76576	down	protein_coding	NM_001105205	CCDS41412.1	RUSC1	RefSeq	2525	chr1	+	155293727	155300909	CTCGCCTCCCTCCGTCTCCTCCCTTTCCCCTGTCTGTCTTTCCATTGGTCCATGCCGCCC	23623	RUN and SH3 domain-containing protein 1 isoform c	11.373	13.2859
ASHGA5P032418	0.00165348	0.0146089	3.76492	down	protein_coding	ENST00000328119	CCDS11395.1	KRT36	GENCODE	1644	chr17	-	39642387	39646116	TATCAAGGGCCTCTGTGGCACAGCAGGCGGCATCTCTCGGGTGTCCTCCATCCGTTCTGT	8689	keratin 36 [Source:HGNC Symbol;Acc:6454]	4.00007	5.91269
ASHGA5P007388	0.000971685	0.0107551	3.76323	down	protein_coding	NM_017596	CCDS30965.1	KIF21B	RefSeq	9916	chr1	-	200938513	200992828	TCTTCTCTCGTCTCACCAGTAATCAGAGCCAGGGGTCAGCGCTGGACAAGGGCATCATCT	23046	kinesin-like protein KIF21B isoform 2	2.74657	4.65854
ASHGA5P044963	0.0229881	0.068645	3.71548	down	protein_coding	NM_001100117	CCDS55269.1	RIMS2	RefSeq	6797	chr8	+	104512975	105266656	TATTGCCAAACAAAGTTCTGTGCTCGTTGTGGAGGTCGAGTGTCATTACGCTCAAACAAG	9699	regulating synaptic membrane exocytosis protein 2 isoform a	3.39298	5.28653
ASHGA5P055424	0.00232173	0.0177082	3.71218	down	protein_coding	NM_000224	CCDS31809.1	KRT18	RefSeq	1485	chr12	+	53342842	53346685	GGCCGCCACCGTCGTCCGCAAAGCCTGAGTCCTGTCCTTTCTCTCTCCCCGGACAGCATG	3875	"keratin, type I cytoskeletal 18"	8.82432	10.7166
ASHGA5P033985	0.000721693	0.00923604	3.712	down	protein_coding	NM_007322	CCDS42478.1	RANBP3	RefSeq	3415	chr19	-	5916151	5978320	ACTCCTCCGCCTCCCGCTCCTGAAGCCCAGCTTCCTCCTTTTCCGCGAGAACTGGCAGGG	8498	ran-binding protein 3 isoform RANBP3-d	9.33618	11.2284
ASHGA5P055417	0.000323997	0.00584276	3.69288	down	protein_coding	NM_000424	CCDS8830.1	KRT5	RefSeq	2320	chr12	-	52908358	52914243	TAGCAGCTCCAGCGTCAAATTTGTCTCCACCACCTCCTCCTCCCGGAAGAGCTTCAAGAG	3852	"keratin, type II cytoskeletal 5"	7.78275	9.6675
ASHGA5P011814	0.000511846	0.00771876	3.67363	down	protein_coding	NM_024820	CCDS35134.1	DENND1A	RefSeq	2166	chr9	-	126163869	126692417	GCCCTGAGCAAAACACCATTGCAACACCAGCTACACTCCACATCCTACAGAAAAGCATTA	57706	DENN domain-containing protein 1A isoform 2	5.7126	7.58981
ASHGA5P037593	0.000486947	0.00752696	3.6685	down	protein_coding	NM_001128633	CCDS46669.1	RIMBP3C	RefSeq	5802	chr22	-	21899957	21905750	CTGGGAGGTTAAGGTTATCTGTCCATTGCCTTGTACGAAAGTCTCAAGAAAAGTCTACAT	150221	RIMS-binding protein 3C	5.41219	7.28738
ASHGA5P008349	0.000634302	0.00874927	3.65983	down	protein_coding	NM_006749	CCDS6132.1	SLC20A2	RefSeq	3971	chr8	-	42273979	42397356	GCCATGGTTGGTTCCGCTGTGTGGCAGCTGATTGCTTCCTTCCTGAGGCTTCCAATCTCA	6575	sodium-dependent phosphate transporter 2	3.84306	5.71483
ASHGA5P055256	0.00201005	0.016368	3.65058	down	protein_coding	NM_017417	CCDS8533.1	GALNT8	RefSeq	2135	chr12	+	4829751	4881892	TACCTGAAAAATGTTTATCCACTCTTGAAGCCACTCCACACCATCGTGGGCTATGGAAGA	26290	probable polypeptide N-acetylgalactosaminyltransferase 8	6.41565	8.28378
ASHGA5P006532	0.019938	0.062721	3.64958	down	protein_coding	NM_003934	CCDS43893.1	FUBP3	RefSeq	3175	chr9	+	133454959	133513739	CAGCAGGTCCCAAGCCAGCAGAGCCAGCCGCAGAGCAGCCAGCCCAACTACAGCAAGGCC	8939	far upstream element-binding protein 3	5.82904	7.69677
ASHGA5P046670	0.032031	0.0822949	3.63843	down	protein_coding	NM_001017417	CCDS48174.1	CT45A1	RefSeq	1008	chrX	+	134847184	134856988	TGTGGCTGGCTGCTTCCCTTCCTTCCATCCCCTTTGGACCAAACGGGATCGGTGCTTCTG	541466	cancer/testis antigen family 45 member A1	10.4257	12.289
ASHGA5P010347	0.0250031	0.0721345	3.63436	down	protein_coding	ENST00000360957	CCDS33050.1	PPP1R13L	GENCODE	3120	chr19	-	45882891	45908312	GCCCGGATCCGCGCCCGCTCCGGCCGGCACCATGGACAGCGAGGCATTCCAGAGCGCGCG	10848	"protein phosphatase 1, regulatory subunit 13 like [Source:HGNC Symbol;Acc:18838]"	3.22244	5.08415
ASHGA5P040844	0.0086576	0.037576	3.61928	down	protein_coding	ENST00000327245	CCDS43394.1	ATP10B	GENCODE	7566	chr5	-	159990126	160279219	TTTACCTCCTTGCCTCCTCTTGTCTTTGGAGTCCTTGACAAAGACATCTCTGCAGAAACA	23120	"ATPase, class V, type 10B [Source:HGNC Symbol;Acc:13543]"	5.35269	7.20839
ASHGA5P005566	4.40544e-06	0.000462662	3.61501	down	protein_coding	NM_080794	CCDS33522.1	MRPL39	RefSeq	1171	chr21	-	26957967	26979801	GATCTCGGAAAATGACTCCATTTCCCATTCTCCTTCTATTTACTACGCAGTCATTCTTCA	54148	"39S ribosomal protein L39, mitochondrial isoform b"	3.3146	5.1686
ASHGA5P052516	0.0429173	0.0969183	3.60481	down	protein_coding	ENST00000253490	CCDS43401.1	FAM153B	GENCODE	2096	chr5	+	175511908	175543458	ATGACTTTTACCTCATTTTTAAAACAAATCCATAGTATGGTAAGTTACATCAATATGGAG	202134	"family with sequence similarity 153, member B [Source:HGNC Symbol;Acc:27323]"	3.94247	5.79239
ASHGA5P046514	0.000843336	0.0100033	3.60398	down	protein_coding	NM_006915	CCDS14270.1	RP2	RefSeq	3831	chrX	+	46696346	46741791	AGGATGCTCAAAGGGTTTTTCGGGAAAAAGCACCTGACTTCCTTCCTCTTCTGAACAAAG	6102	protein XRP2	4.87921	6.7288
ASHGA5P034614	0.000850556	0.0100054	3.60232	down	protein_coding	ENST00000333625	CCDS12531.1	IL29	GENCODE	856	chr19	+	39786964	39789312	GAAAAACTGGAGTTGCAGCTCTCCTGTCTTCCCCGGGAATTGGGACCTGAGGCTTCTCCA	282618	"interleukin 29 (interferon, lambda 1) [Source:HGNC Symbol;Acc:18363]"	5.012	6.86092
ASHGA5P002274	0.000297061	0.00549213	3.59883	down	protein_coding	NM_001570	CCDS33697.1	IRAK2	RefSeq	3469	chr3	+	10206562	10285427	TGATTCAAAGGACTTCAGCACCTCCATTCCTAAGCAGGAAAAACTTTTGAGCTTGGCTGG	3656	interleukin-1 receptor-associated kinase-like 2	4.25527	6.1028
ASHGA5P029461	0.00332261	0.0217854	3.57964	down	protein_coding	ENST00000408907	CCDS41923.1	PSMB11	GENCODE	1894	chr14	+	23511375	23513269	CTTATCTGCTCTCCTTCTCTGACTTGACCATCATGACTAGAATGATTATCCCTTTACTGA	122706	"proteasome (prosome, macropain) subunit, beta type, 11 [Source:HGNC Symbol;Acc:31963]"	4.95294	6.79276
ASHGA5P010536	0.0238198	0.0701276	3.57208	down	protein_coding	ENST00000361874	CCDS1939.1	DCTN1	GENCODE	4500	chr2	-	74588280	74607482	CTCCTCCTTCAGGCATTGCTACTCTGGTCTCTGGCATTGCTGGTGAAGAACAGCAGCGAG	1639	dynactin 1 [Source:HGNC Symbol;Acc:2711]	4.58121	6.41798
ASHGA5P014456	0.00553888	0.0290127	3.56552	down	protein_coding	NM_001103148	CCDS46543.1	GIGYF2	RefSeq	7735	chr2	+	233562014	233725289	CACAGTCCTGGCTGGCGGGAACACATGGAACGACGTCGGAGGTTTGAGTTTGATTTTCGA	26058	PERQ amino acid-rich with GYF domain-containing protein 2 isoform c	3.76101	5.59512
ASHGA5P037507	0.00740387	0.0341127	3.56179	down	protein_coding	ENST00000334662	CCDS13713.1	KRTAP10-8	GENCODE	876	chr21	+	46031995	46032871	TGCTGTGTGCCTGTCTGCTCTGGGGCTTCCTCTCTGTGCTGCCAGAAGTCTAGCTGCCAG	386681	keratin associated protein 10-8 [Source:HGNC Symbol;Acc:20525]	6.69825	8.53085
ASHGA5P042666	0.0153068	0.0535203	3.56038	down	protein_coding	NM_198569	CCDS47489.1	GPR126	RefSeq	6934	chr6	+	142623055	142767403	CACCACCCACTGTCACCACTAACATGCCTGTTACTAACAGAATCGATAAACAAAGGAATG	57211	G-protein coupled receptor 126 beta 1 precursor	5.97238	7.80441
ASHGA5P011779	0.00342811	0.0221663	3.55371	down	protein_coding	NM_001190730	CCDS55344.1	RALGPS1	RefSeq	1849	chr9	+	129677052	129940810	AGATCTTGCAGCCATGTGAGACCAGAAACCAGCAAGCCAGCCAACCTCCAGCATCAGAGC	9649	ras-specific guanine nucleotide-releasing factor RalGPS1 isoform 4	4.73302	6.56235
ASHGA5P052628	0.00172164	0.0149263	3.55011	down	protein_coding	NM_001207043		LOC554223	RefSeq	1301	chr6	+	29759682	29765584	ATCTTTGCAGGGTTTCTCTTCTCCCTCTCCCAACCTGTGTCGGGTCCTTCTTCCTGGGTA	554223	histocompatibility antigen-related	7.94028	9.76814
ASHGA5P012311	0.00374132	0.0233526	3.54657	down	protein_coding	ENST00000377095	CCDS45700.1	SLC25A39	GENCODE	1610	chr17	-	42396992	42402217	TATACCAAATTGCCCTCCTCTCTCCAATCCACAGGGAAGTGCCTCCTGTATTGCAATGGT	51629	"solute carrier family 25, member 39 [Source:HGNC Symbol;Acc:24279]"	6.59301	8.41944
ASHGA5P034159	0.00078815	0.00966176	3.54399	down	protein_coding	NM_001035516	CCDS42549.1	DMKN	RefSeq	613	chr19	-	35988118	35992813	GCCTCTGCTCTGCTCCTGCTCCTGCTGGGCCTGGCCTGGACCCAGGGGAGCCACGGCTGG	93099	dermokine isoform 1 precursor	6.70034	8.52572
ASHGA5P012103	0.00694112	0.0328617	3.53773	down	protein_coding	ENST00000375741	CCDS45068.1	ARHGEF7	GENCODE	5525	chr13	+	111767623	111947542	GCGGCTGGAGCTCCTGTTTCCTCCTTCCCAGCCTCCTCAGCATCTGGTAACCACCATTCT	8874	Rho guanine nucleotide exchange factor (GEF) 7 [Source:HGNC Symbol;Acc:15607]	6.85116	8.67399
ASHGA5P003502	0.000345837	0.00607421	3.53522	down	protein_coding	NM_001671	CCDS11089.1	ASGR1	RefSeq	1519	chr17	-	7076750	7082883	TCAGCATCTGGACAATGAGGAGAGTGACCACCATCAGCTCAGAAAAGGGCCACCTCCTCC	432	asialoglycoprotein receptor 1 isoform a	2.71261	4.53441
ASHGA5P012675	0.00380375	0.0235412	3.53332	down	protein_coding	NM_001184836	CCDS55376.1	GPR64	RefSeq	4823	chrX	-	19007424	19140755	TAATTCCAGTTTGTCACCACCACCTGATGTTACTTTAAGCTTACTCCCTTCAAACGAAAC	10149	G-protein coupled receptor 64 isoform 8 precursor	5.00429	6.82531
ASHGA5P004611	0.00245484	0.0181872	3.53109	down	protein_coding	NM_021101	CCDS3295.1	CLDN1	RefSeq	3452	chr3	-	190023489	190040235	ATCGTTCAAGAATTCTATGACCCTATGACCCCAGTCAATGCCAGGTACGAATTTGGTCAG	9076	claudin-1	4.71761	6.53773
ASHGA5P013609	0.00912347	0.0388873	3.52105	down	protein_coding	NM_022369	CCDS10261.1	STRA6	RefSeq	2802	chr15	-	74471807	74495220	TTTCATCTCTGCAACTCCTTCCTCCCTGGGCCTCCCTTCTGGAGAAGGGCCAGAGAATGT	64220	stimulated by retinoic acid gene 6 protein homolog isoform a	8.4566	10.2726
ASHGA5P008166	0.00261087	0.0189033	3.50667	down	protein_coding	NM_001184837	CCDS55377.1	GPR64	RefSeq	4805	chrX	-	19007424	19140755	AAGATACTGATAATTCCAGTTTGTCACCACCACCTGAGGTTGAAACAACAAGCCTCAATG	10149	G-protein coupled receptor 64 isoform 9 precursor	4.18979	5.99989
ASHGA5P023281	0.00119307	0.0121908	3.50054	down	protein_coding	NM_014598	CCDS32637.1	SOCS7	RefSeq	7978	chr17	+	36508006	36561846	CATGCCCCAGATGCATTTCCCCGGATTGCTCCCATCCGAGCAGCTGAATCCCTGCACAGC	30837	suppressor of cytokine signaling 7	7.19611	9.00369
ASHGA5P040443	0.00558664	0.0291739	3.50038	down	protein_coding	NM_007036	CCDS3963.1	ESM1	RefSeq	2089	chr5	-	54273694	54281414	AATTCCCCTTCTTCCAATATTCAGTAACCAAGTCTTCCAACAGATTTGTTTCTCTCACGG	11082	endothelial cell-specific molecule 1 isoform a precursor	4.44019	6.2477
ASHGA5P054884	0.00574877	0.0295997	3.4945	down	protein_coding	NM_145017	CCDS8008.1	PPP1R32	RefSeq	1558	chr11	+	61248584	61258400	GCCCTCCTCCCAGGCCAGAGTGTCACCAAGTCAGACTTCCTCCCCAAGACTCACCTACAT	220004	protein phosphatase 1 regulatory subunit 32 isoform 1	8.78253	10.5876
ASHGA5P004766	0.00259618	0.0188579	3.48524	down	protein_coding	NM_001168394	CCDS54948.1	CREBRF	RefSeq	2536	chr5	+	172483354	172519333	CCCAGTCCCTGAGCCGCCCCTACACCCACAGACAGCATCGCACAGAATTATTTTAAAAAA	153222	CREB3 regulatory factor isoform 2	9.10758	10.9088
ASHGA5P003760	0.00753509	0.0344834	3.4845	down	protein_coding	ENST00000275838	CCDS47749.2	ASB10	GENCODE	1820	chr7	-	150872784	150884478	CCTCCCCAAGAAACATCAGCGTTTCTACTCCTCCCTCTTCGCCTTGGTGAGGCAGCCCAG	136371	ankyrin repeat and SOCS box containing 10 [Source:HGNC Symbol;Acc:17185]	6.51328	8.31423
ASHGA5P056132	0.00503305	0.0277294	3.48385	down	protein_coding	NM_024734	CCDS9933.1	CLMN	RefSeq	12750	chr14	-	95648275	95786245	GGACTTTGCGGGCAGTTGGAGGAGTGGGCTGGCTTTCCTGGCGGTGATCAAGGCCATTGA	79789	calmin	4.81018	6.61087
ASHGA5P054864	0.0284684	0.0771708	3.48124	down	protein_coding	NM_001039396	CCDS41650.1	MPEG1	RefSeq	4527	chr11	-	58975982	58980494	AGTTTTCCGCTTCATCATCTGCTTCTGTTTTCTCCATCTTAGTTTGCCCAAAGCTTGCTG	219972	macrophage-expressed gene 1 protein precursor	5.70471	7.50431
ASHGA5P047948	0.00741481	0.0341382	3.44981	down	protein_coding	NM_001177314	CCDS53603.1	RRAS2	RefSeq	2054	chr11	-	14299465	14386052	CACATTAAAAGCAATGGCCCATTAAGGAAATAAGTGGATGATGCTCCTCCATCACCCATG	22800	ras-related protein R-Ras2 isoform c	3.80529	5.5918
ASHGA5P010712	0.00966694	0.0401783	3.44475	down	protein_coding	NM_001164688	CCDS1498.1	RD3	RefSeq	4287	chr1	-	211649863	211666259	TGTCTGCGTTAAGATCCACCCATCCTATTGTGGGCCTGCTATCCTCAGGTTCCGGCAGCT	343035	protein RD3	4.9511	6.7355
ASHGA5P043904	0.000751959	0.00942215	3.44118	down	protein_coding	NM_001004023	CCDS31000.1	DYRK3	RefSeq	2301	chr1	+	206808880	206822542	ATCCTTAATCATTTAGAATTTTGCCTCCACCATCCACCAGAAAATGAAGTGGAAAGAGAA	8444	dual specificity tyrosine-phosphorylation-regulated kinase 3 isoform b	4.84044	6.62334
ASHGA5P053110	0.0141367	0.0510677	3.43265	down	protein_coding	ENST00000493151	CCDS44267.1	NOS1AP	GENCODE	5559	chr1	+	162332772	162339813	TGTCCTGTCTTCTCTGCCGCTGCCTCTTCTCTGCAGGTACACTTGCTGAAGGACCAGTTG	9722	nitric oxide synthase 1 (neuronal) adaptor protein [Source:HGNC Symbol;Acc:16859]	6.97732	8.75664
ASHGA5P004158	0.00860034	0.0374409	3.42716	down	protein_coding	NM_000827	CCDS4322.1	GRIA1	RefSeq	5747	chr5	+	152870083	153193429	CTGCCCTGAGAAATCCAGTAAACCTGGCAGTGTTAAAACTGAACGAGCAGGGGCTTTTGG	2890	glutamate receptor 1 isoform 1 precursor	5.25076	7.02777
ASHGA5P039666	0.00127378	0.0126285	3.41338	down	protein_coding	NM_001025199	CCDS41367.1	CHI3L2	RefSeq	1516	chr1	+	111772332	111786062	AGAAGGTGGTCATGGGCATCCCCACATATGGGCACTCCTTCACACTGGCCTCTGCAGAAA	1117	chitinase-3-like protein 2 isoform c	5.60686	7.37806
ASHGA5P000700	0.00222423	0.0172437	3.41122	down	protein_coding	ENST00000074304	CCDS46369.1	INPP4A	GENCODE	6752	chr2	+	99061320	99207496	CCTCCACTGCATGCCATCCTCATCTGACCACACATTGCAGTCCCCCTCCTGAAGAGTCCA	3631	"inositol polyphosphate-4-phosphatase, type I, 107kDa [Source:HGNC Symbol;Acc:6074]"	8.61391	10.3842
ASHGA5P008734	0.000161652	0.00384295	3.40832	down	protein_coding	ENST00000355162	CCDS14779.1	TBL1Y	GENCODE	2376	chrY	+	6778726	6959724	CGTCTGATGGCTCTGTGTGTGTTCTGGATCTGTGAAAGTAAACACAAAATATAGAAAAAA	90665	"transducin (beta)-like 1, Y-linked [Source:HGNC Symbol;Acc:18502]"	4.01396	5.78302
ASHGA5P055083	0.00959793	0.0400385	3.40143	down	protein_coding	NM_020179	CCDS8292.1	C11orf75	RefSeq	979	chr11	-	93211638	93276546	CCCACCATCACCGAGTGAGCCCCGCAGCCGGCTGCGGACCCCATCGGCAGGGAGAGGAGG	56935	UPF0443 protein C11orf75	5.76121	7.52735
ASHGA5P032351	0.0228813	0.0684159	3.39978	down	protein_coding	ENST00000297307	CCDS11293.1	SLC35G3	GENCODE	1874	chr17	-	33519538	33521412	TGTTAATCTAGAAGAAAGTGGTTGCATAGAGAAGAGTAAGAATGTAGACCAGCTTATTGA	146861	"solute carrier family 35, member G3 [Source:HGNC Symbol;Acc:26848]"	4.36544	6.13088
ASHGA5P042179	0.00738872	0.0340737	3.39426	down	protein_coding	NM_144699	CCDS1197.1	ATP1A4	RefSeq	3912	chr1	+	160121351	160156767	TCACTTCTCTTGGGCTATGGTTGGCTGGAGGCTATCATTTTTCTCATTGGCATCATTGTG	480	sodium/potassium-transporting ATPase subunit alpha-4 isoform 1	3.4025	5.16559
ASHGA5P008472	0.000111651	0.00300896	3.38338	down	protein_coding	ENST00000343529	CCDS34722.1	RELN	GENCODE	11565	chr7	-	103112230	103629963	AGGTCGTCCTCACTCGCAAACAAAATTACATGATGAATTTTTCACGACAACATGGGCTCA	5649	reelin [Source:HGNC Symbol;Acc:9957]	3.38362	5.14209
ASHGA5P049193	0.0034524	0.0222823	3.38313	down	protein_coding	NM_001099687	CCDS45477.1	TP53TG3B	RefSeq	1447	chr16	-	32684848	32687448	TGATTTATTTTTCCAACCCATCTAATTCTTCTGTCTCTCTCCTCTCCTCAGGCTCAATAA	729355	TP53-target gene 3 protein isoform 1	6.97407	8.73242
ASHGA5P049513	0.00110406	0.011583	3.38189	down	protein_coding	NM_018955	CCDS11177.1	UBB	RefSeq	971	chr17	+	16284366	16286054	AGCCCGGAGCATTTAGGGGCGGTTGGCTTTGTTGGGTGAGCTTGTTTGTGTCCCTGTGGG	7314	polyubiquitin-B precursor	3.25064	5.00847
ASHGA5P011222	0.0138766	0.050506	3.36727	down	protein_coding	NM_001077394	CCDS41358.1	DPH5	RefSeq	1828	chr1	-	101455179	101491362	ATTGGCTGCTCCTAGTCTCTCTTCTCCTCAAGTTTGAAATGCTTTATCTCATCGGGTTGG	51611	diphthine synthase isoform a	5.46169	7.21327
ASHGA5P020595	0.0215117	0.0657485	3.34639	down	protein_coding	NM_001495	CCDS47816.1	GFRA2	RefSeq	3376	chr8	-	21549529	21646346	GATCTTGGCAAACGTCTTCTGCCTCTTCTTCTTTCTAGACGAGACCCTCCGCTCTTTGGC	2675	GDNF family receptor alpha-2 isoform a preproprotein	5.40091	7.14351
ASHGA5P004713	0.00240839	0.0179799	3.33998	down	protein_coding	NM_032355	CCDS2808.2	MON1A	RefSeq	2244	chr3	-	49946301	49967445	GCAGACAAGAACGCCATCCGCTCCATCCATGCAGATGGCTACAAGGTAGTATTCGTGCGC	84315	vacuolar fusion protein MON1 homolog A isoform a	4.50014	6.23998
ASHGA5P001218	0.012598	0.047616	3.3391	down	protein_coding	NM_001084	CCDS5715.1	PLOD3	RefSeq	2995	chr7	-	100849257	100861011	CCGGCATGAGGATTCAAGGCTGGCTGGAGGCTACGAGAATGTGCCCACCGTGGACATCCA	8985	"procollagen-lysine,2-oxoglutarate 5-dioxygenase 3 precursor"	4.29081	6.03027
ASHGA5P034285	0.00578595	0.029677	3.33181	down	protein_coding	NM_002152	CCDS12759.1	HRC	RefSeq	2430	chr19	-	49654455	49658681	TGAAGAGGACTTCCAAGATGAGTATAAAACAGAAGTCCCTCACCATCACCACCACAGAGT	3270	sarcoplasmic reticulum histidine-rich calcium-binding protein precursor	5.23478	6.97108
ASHGA5P013628	0.00134285	0.0129175	3.31698	down	protein_coding	NM_001144942	CCDS45636.1	RAB34	RefSeq	1761	chr17	-	27041298	27044908	TGTGCTTCTCTTCCTTACCCCTGCTCAGTATGCGCTGATGGAGAAAGACGCCCTCCAGGT	83871	ras-related protein Rab-34 isoform 4	5.46334	7.19321
ASHGA5P009738	0.0307721	0.0803578	3.31403	down	protein_coding	ENST00000356929	CCDS32980.1	ZNF708	GENCODE	4003	chr19	-	21473962	21512212	GTATTCCTGGGTATTGCTGTGTCTAATTTAGACCTGATCACCTGTCTGGAGCAAGGAAAA	7562	zinc finger protein 708 [Source:HGNC Symbol;Acc:12945]	5.71226	7.44084
ASHGA5P010464	2.42372e-05	0.00126618	3.31327	down	protein_coding	NM_014847	CCDS1063.1	UBAP2L	RefSeq	4006	chr1	+	154193324	154243329	TTCTCAGATCCTTCACCATCACCTGCAGCAGGATGGCCAGACGGGCAGCGGGCAACGTAG	9898	ubiquitin-associated protein 2-like isoform a	4.10297	5.83122
ASHGA5P034025	0.0174364	0.0579158	3.30741	down	protein_coding	NM_006631	CCDS12213.1	ZNF266	RefSeq	3618	chr19	-	9523270	9546234	AATGGAAAGTGCAACTTAAAACCAAAGAGTTAGCCCTTCAGCAGGATGTTTTGGGGGAGC	10781	zinc finger protein 266	10.2566	11.9823
ASHGA5P051609	0.0176312	0.0582956	3.29804	down	protein_coding	NM_016247	CCDS2940.1	IMPG2	RefSeq	8365	chr3	-	100941389	101039419	TCTGTCCTCTCCTCATTCCTTTGGTTTTGGCCCAAATGATTATGTTTCCTCTTTTTGGGA	50939	interphotoreceptor matrix proteoglycan 2 precursor	5.63889	7.3605
ASHGA5P052692	0.00370043	0.0231407	3.29342	down	protein_coding	NM_005453	CCDS4775.1	ZBTB22	RefSeq	2681	chr6	-	33282181	33285512	GGTATCCCCTCCCTCCACAACATGGAGCCATCTCCTCTGTCTCCCAGTGGGGCAGCACTT	9278	zinc finger and BTB domain-containing protein 22	10.3026	12.0222
ASHGA5P044196	0.00681283	0.0325985	3.29217	down	protein_coding	NM_024025	CCDS6092.1	DUSP26	RefSeq	1665	chr8	-	33448853	33457439	TACCACCACCTTACCCTCGTGGAGGCCATCAAGAAAGTCAAAGACCACCGAGGCATCATC	78986	dual specificity protein phosphatase 26	5.13415	6.85318
ASHGA5P031565	0.00144253	0.0134817	3.29044	down	protein_coding	NM_001004067	CCDS42123.1	NOMO3	RefSeq	4336	chr16	+	16326388	16388668	GCGGCGGCTGGCGGCGGCGGTGGGGCGGGGCCTGGGCTGTCAGCCGGCCTAGGAGGAGGA	408050	nodal modulator 3 precursor	5.35979	7.07807
ASHGA5P012227	6.26258e-05	0.00221517	3.28873	down	protein_coding	ENST00000376581	CCDS32000.1	FARP1	GENCODE	1321	chr13	+	98795433	98897558	GGAGGCATTTGAAGTTCCAATGGTGTCCTCATCCTCCTTCCTCAAAGCCACCGGCTCCTC	10160	"FERM, RhoGEF (ARHGEF) and pleckstrin domain protein 1 (chondrocyte-derived) [Source:HGNC Symbol;Acc:3591]"	5.33648	7.05401
ASHGA5P052172	0.0208669	0.0646358	3.27837	down	protein_coding	NM_024330	CCDS1053.1	SLC27A3	RefSeq	2430	chr1	+	153747767	153752633	TCCTCCCGGGTTTCTGCTCTCCGCCCGTGTGGAGTGGTGGGGGCCTGGGTGGGAATGGGC	11000	long-chain fatty acid transport protein 3	7.75126	9.46424
ASHGA5P044376	0.0192155	0.0612414	3.2773	down	protein_coding	NM_172239		REXO1L1	RefSeq	7032	chr8	-	86758550	86789306	TGGAAGGCAAAAGCTACTGAATTTAGCGAATTTGTGGAGGCATTGCCACAAATCAGCCAG	254958	exonuclease GOR	3.37072	5.08323
ASHGA5P009684	0.0122319	0.0467372	3.27177	down	protein_coding	NM_183360	CCDS46236.1	DTNB	RefSeq	2453	chr2	-	25600111	25896516	ATGTCATCCCTGGTGAAGGAGCTCCATTCAGGTTAGCAGAGGAGCCGGACACAGAGGAAG	1838	dystrobrevin beta isoform 4	4.00385	5.71392
ASHGA5P001464	0.00374398	0.0233526	3.25488	down	protein_coding	NM_021629	CCDS3230.1	GNB4	RefSeq	6428	chr3	-	179113875	179169371	CTCCCTCCAGCTGTTTTCACTCATTAGCTCCTGAGGTAAACAAATTGAAAAAATGAGCGA	59345	guanine nucleotide-binding protein subunit beta-4	5.72398	7.42658
ASHGA5P054734	0.00528387	0.0284647	3.25385	down	protein_coding	NM_001080521		RASSF10	RefSeq	2698	chr11	+	13030969	13033653	GCCGCCCCAGCAGACCCCGGCCGGACCTGCCACCTGCGCCCTGGTTGCGCCATGGATCCT	644943	ras association domain-containing protein 10	7.42469	9.12684
ASHGA5P000718	0.000141723	0.0035299	3.24719	down	protein_coding	NM_016041	CCDS11073.1	DERL2	RefSeq	1156	chr17	-	5377612	5389494	CTTAATGACCCTTTTTGGTCTGTTTGTGAGCTTAGTTTTCTTGGGCCAGGCCTTTACAAT	51009	derlin-2	2.87141	4.5706
ASHGA5P009676	0.00145439	0.0135553	3.24402	down	protein_coding	NM_001042376	CCDS41598.1	INS-IGF2	RefSeq	847	chr11	-	2167852	2182439	GACCTGCAGGCCTCAGCTTTGTCCCTCTCCTCCTCCACGTCAACCTGGCCAGAGGGTCTG	723961	insulin- insulin-like growth factor 2 read-through product precursor	7.75928	9.45706
ASHGA5P002597	0.00617566	0.0307485	3.24009	down	protein_coding	NM_005460	CCDS4131.1	SNCAIP	RefSeq	3569	chr5	+	121647819	121799794	CTCTCTCCTGCCACACCTAGCTGCAGACAATCTAGACAAAATTCACGACGAAAATGGAAA	9627	synphilin-1 isoform 1	5.59371	7.28975
ASHGA5P012144	0.00057776	0.00834732	3.23604	down	protein_coding	ENST00000375976	CCDS4709.1	BAG6	GENCODE	3644	chr6	-	31606804	31620170	TCAGCTAGCAGAGACCTGTCGGCCATGGAGCCTAATGATAGTACCAGTACCGCTGTGGAG	7917	BCL2-associated athanogene 6 [Source:HGNC Symbol;Acc:13919]	2.88265	4.57688
ASHGA5P006331	0.00593076	0.030088	3.23491	down	protein_coding	NM_024070	CCDS5690.1	PVRIG	RefSeq	1587	chr7	+	99816870	99819111	CCAGTATGGGGCCTAGCCAGGGCTGGGTTCTCACCCACCTGTGCCGCCCTGCCTTGTTAC	79037	transmembrane protein PVRIG	3.65445	5.34818
ASHGA5P004876	7.39782e-06	0.000622823	3.2273	down	protein_coding	NM_003086	CCDS6998.1	SNAPC4	RefSeq	4661	chr9	-	139270028	139292889	TAATAGAAAAATATGGTGTCGGTCACTGGGCAAAAATAGCTTCTGAGCTGCCCCATCGGT	6621	snRNA-activating protein complex subunit 4	4.89384	6.58417
ASHGA5P029219	4.28044e-05	0.00178708	3.22624	down	protein_coding	NM_203309	CCDS9815.1	HEATR4	RefSeq	3472	chr14	-	73945188	74025651	AACCCAAAGGAGAACAAGGACCACTAACACTCCAGACTTTACTCCAAGAAACTTTTCAGG	399671	HEAT repeat-containing protein 4	3.13373	4.82359
ASHGA5P011409	0.0235331	0.0696089	3.22386	down	protein_coding	NM_006434	CCDS31252.1	SORBS1	RefSeq	5402	chr10	-	97071529	97200937	TGATGATAAAGAGATGAGACCTGCCAGAGCCAAATTTGACTTTAAAGCTCAGACACTAAA	10580	sorbin and SH3 domain-containing protein 1 isoform 1	3.6392	5.32799
ASHGA5P019342	0.00206307	0.0166234	3.21293	down	protein_coding	NM_001170752	CCDS55402.1	SRPX	RefSeq	1798	chrX	-	38008587	38080177	AATGCTGCAGGCTGTTGCTGCGAATCCCACTCTACTCCTTCAGTATGGTGCTAGTGGATA	8406	sushi repeat-containing protein SRPX isoform 4 precursor	4.68145	6.36533
ASHGA5P006389	0.000220939	0.00462722	3.21023	down	protein_coding	NM_017735	CCDS33176.1	TTC27	RefSeq	2953	chr2	+	32853086	33046118	GTCGGTTCAGAGAGTGGATCTTTCCTACAATTGCTACTGGAAGGGAACTATGAAGCCATA	55622	tetratricopeptide repeat protein 27 isoform 1	2.58981	4.27249
ASHGA5P015485	0.0219007	0.0664587	3.19572	down	protein_coding	NM_001164315	CCDS54379.1	ANKRD36	RefSeq	6269	chr2	+	97779232	97930257	AGAAGAGAAATTCACTTCCCTAAATAAATCAGCGGGGGTGTCTCCTCAGAAACAATCGGC	375248	ankyrin repeat domain-containing protein 36A	6.37161	8.04775
ASHGA5P016014	0.00572119	0.0295524	3.19449	down	protein_coding	NM_001145515	CCDS47568.1	SCRN1	RefSeq	5118	chr7	-	29959718	30029425	GCCGCCCCAGTGCACTTACATTTCAATCGACCAAGTTCCAAGGACCTATGCCATAATGAT	9805	secernin-1 isoform c	6.75605	8.43163
ASHGA5P032504	0.000646662	0.00880855	3.19267	down	protein_coding	NM_002145	CCDS11527.1	HOXB2	RefSeq	1614	chr17	-	46620018	46622393	GGAGACATTTCAAACTTCATCAATCAAGGAGTCGACATTAATTCCTCCTCCTCCTCCTTT	3212	homeobox protein Hox-B2	4.76121	6.43597
ASHGA5P049968	0.00125034	0.0125018	3.18912	down	protein_coding	ENST00000361303	CCDS45833.1	C18orf1	GENCODE	8086	chr18	+	13620866	13652753	ACTCTCCTCTTCCATGGCAGCGGAGCTGGAGTTCGCCCAAATCATCATCATCGTCGTGGT	753	chromosome 18 open reading frame 1 [Source:HGNC Symbol;Acc:1224]	4.08728	5.76043
ASHGA5P011835	0.00454529	0.0263084	3.18507	down	protein_coding	ENST00000373745	CCDS13286.1	DSN1	GENCODE	2354	chr20	-	35380193	35402154	CCTCCTCCCGGAGTTTACCACCTAGGATGACTTCAGTGACTAGATCAGAGATCATAGATG	79980	"DSN1, MIND kinetochore complex component, homolog (S. cerevisiae) [Source:HGNC Symbol;Acc:16165]"	4.34717	6.0185
ASHGA5P040587	0.00384534	0.0236692	3.17489	down	protein_coding	NM_153234	CCDS4088.1	LIX1	RefSeq	3979	chr5	-	96427573	96478520	TTCCAACTATTGCACTGGAATGGAAGCCTAAAAGCCCTTCGTGAAACAAAGTGTTCCCGA	167410	protein limb expression 1 homolog	3.43942	5.10613
ASHGA5P051862	0.00311569	0.0209546	3.16451	down	protein_coding	NM_207046	CCDS961.1	ENSA	RefSeq	1116	chr1	-	150594598	150601609	AAGACGGTGAATGGAAAGGGGATGGCTGGTGGTCTTGGGTGTGATGTGTGTTATTGGTTT	2029	alpha-endosulfine isoform 6	3.84469	5.50667
ASHGA5P002519	0.0170024	0.0570637	3.1611	down	protein_coding	NM_020396	CCDS10148.1	BCL2L10	RefSeq	887	chr15	-	52401821	52404972	AGGGCGGCTGGGATGGCTTTTGTCACTTCTTCAGGACCCCCTTTCCACTGGCTTTTTGGA	10017	bcl-2-like protein 10	7.81794	9.47837
ASHGA5P011675	0.00216225	0.016996	3.15745	down	protein_coding	NM_004034	CCDS7326.1	ANXA7	RefSeq	2212	chr10	-	75135188	75173841	TTCTCTCCTGTTTCTTTGGATTATAGCAGTGAACCTGCCACAGTGACTCAGGTCACTCAA	310	annexin A7 isoform 2	3.20825	4.86701
ASHGA5P002966	0.000572444	0.00830696	3.14891	down	protein_coding	ENST00000530656	CCDS7912.1	PRDM11	GENCODE	1536	chr11	+	45117356	45246459	ATGCTCACCTCTCTTCCTTTACCAGAGAGAGAAAGACAGAATGACCGAGAACATGAAGGA	56981	PR domain containing 11 [Source:HGNC Symbol;Acc:13996]	3.85079	5.50565
ASHGA5P015613	0.004217	0.0251809	3.14881	down	protein_coding	NM_001100592	CCDS47742.1	ATP6V0E2	RefSeq	2565	chr7	+	149570056	149577738	TCACCATGCTGGTCGCCACCGCCGTCTGCTGTTACCTCTTGTGCCCAGCTCTCGGAATGA	155066	V-type proton ATPase subunit e 2 isoform 2	7.56221	9.21702
ASHGA5P038786	0.00939617	0.0395965	3.1474	down	protein_coding	NM_003278	CCDS2726.1	CLEC3B	RefSeq	886	chr3	+	45067758	45077563	CCCAGGTCACCACCGAGCCACCAACCCAGAAGCCCAAGAAGATTGTAAATGCCAAGAAAG	7123	tetranectin precursor	5.75929	7.41345
ASHGA5P003633	0.000241781	0.00493592	3.13365	down	protein_coding	NM_199336	CCDS2030.1	FAHD2B	RefSeq	1286	chr2	-	97749322	97760582	CCGCCGCCAGGCTCTGATGCTGGTGTCTGGTAGAAGAAGATTACTCACAGCTCTGCTGCA	151313	fumarylacetoacetate hydrolase domain-containing protein 2B	3.13836	4.7862
ASHGA5P014171	0.00307804	0.0207885	3.12847	down	protein_coding	NM_005134	CCDS42413.1	PPP4R1	RefSeq	3929	chr18	-	9546788	9614605	TGCTGTTGAGAATATGGACTCCACTCTTCACTATATTCACAGCGATTCAGACTTGAGCAA	9989	serine/threonine-protein phosphatase 4 regulatory subunit 1 isoform b	3.28017	4.92563
ASHGA5P042465	0.0212129	0.0652175	3.11512	down	protein_coding	ENST00000340057	CCDS4937.1	IL17A	GENCODE	1859	chr6	+	52051184	52055436	AAACTCATCCATCCCCAGTTGATTGGAAGAAACAACGATGACTCCTGGGAAGACCTCATT	3605	interleukin 17A [Source:HGNC Symbol;Acc:5981]	5.46842	7.10771
ASHGA5P013919	0.0300705	0.0793246	3.10439	down	protein_coding	NM_025078	CCDS12020.1	PQLC1	RefSeq	2565	chr18	-	77662419	77711653	TCCTTCCTGGACTTCGACCCCCACCACTTCTGGCAGTGGAGCAGCTTCTCGGACTACGTG	80148	PQ-loop repeat-containing protein 1 isoform 1	7.53598	9.17029
ASHGA5P012130	8.21162e-05	0.00256089	3.10256	down	protein_coding	ENST00000375858	CCDS34401.2	LY6G5C	GENCODE	726	chr6	-	31644460	31648150	ATAGTGCTGGTCATGATGAGCTTGGTGTTTGGTAAGTTTGTTCCTGTCAATTGGGAACCC	80741	"lymphocyte antigen 6 complex, locus G5C [Source:HGNC Symbol;Acc:13932]"	2.74743	4.38088
ASHGA5P052353	0.00122761	0.0124064	3.098	down	protein_coding	ENST00000333274	CCDS4097.1	EFNA5	GENCODE	5335	chr5	-	106712589	107006596	ATTATAGCACAGTCTCCTCCCATCACTTGTCACAGAAAACATCAGGGTCTTGGAACACCA	1946	ephrin-A5 [Source:HGNC Symbol;Acc:3225]	5.70647	7.33781
ASHGA5P019493	0.000264204	0.00513638	3.09235	down	protein_coding	NM_001014840	CCDS34433.1	CUTA	RefSeq	951	chr6	-	33384318	33386065	CGGCGGAGTGGCCTCTCTGCTCCTGTCTTTTGTTTGGATGCCGGCGCTGCTGCCTGTGGC	51596	protein CutA isoform 3 precursor	4.29197	5.92067
ASHGA5P008483	0.00646298	0.0316602	3.08871	down	protein_coding	NM_001130021	CCDS45684.1	ATP6V0A1	RefSeq	4205	chr17	+	40610861	40674597	TCAGCATGACCAGCTCTCCACCCACTCAGAGGACGCAGACGAGCCTTCCGAGGACGAAGT	535	V-type proton ATPase 116 kDa subunit a isoform 1 isoform b	6.29252	7.91953
ASHGA5P050952	0.00550085	0.0289434	3.08152	down	protein_coding	NM_001083537		FAM86B1	RefSeq	2458	chr8	-	12039612	12051624	GGACTTGAGACCCTTCACAACCCCCCTCACTTGGACTTGAGACCCTTCACAACCCAGCAG	85002	protein FAM86B1	12.9081	14.5317
ASHGA5P045641	0.00790081	0.0355031	3.08114	down	protein_coding	ENST00000317861	CCDS31112.1	OR14C36	GENCODE	939	chr1	+	248512076	248513015	CTCCCCTCTTTAACCCTATTATTTACAGTCTTAGAAATAAGCAAATAAAGGTGGCCATCA	127066	"olfactory receptor, family 14, subfamily C, member 36 [Source:HGNC Symbol;Acc:15026]"	5.77433	7.39779
ASHGA5P053908	0.0031517	0.0210686	3.08108	down	protein_coding	ENST00000540122	CCDS55366.1	HDHD1	GENCODE	825	chrX	-	6975626	7066231	GGATCCCTTCTCAGCGCTCCTCCTTCTGTGTAATCAACTGCTTCTCTGCTCTGATGACAC	8226	haloacid dehalogenase-like hydrolase domain containing 1 [Source:HGNC Symbol;Acc:16818]	6.01246	7.6359
ASHGA5P007360	0.000944556	0.0105727	3.07788	down	protein_coding	NM_001101	CCDS5341.1	ACTB	RefSeq	1852	chr7	-	5566778	5570232	CCGCCGCCAGCTCACCATGGATGATGATATCGCCGCGCTCGTCGTCGACAACGGCTCCGG	60	"actin, cytoplasmic 1"	8.16854	9.79048
ASHGA5P033962	0.000242483	0.00494034	3.0763	down	protein_coding	NM_031304	CCDS12108.1	DOHH	RefSeq	1761	chr19	-	3490818	3500621	ATGGATCAGCCAGGCCTTCGATGACGATTCCGCCCTGCTCAAGCACGAGCTGGCCTACTG	83475	deoxyhypusine hydroxylase	4.37112	5.99231
ASHGA5P048687	0.00594436	0.030097	3.07613	down	protein_coding	NM_001948	CCDS45255.1	DUT	RefSeq	1874	chr15	+	48624364	48635570	GTGCGCTCTCCTCTTCCCCCGGTGGTCTCCTCGCTCGCCTTCTGGCTCTGCCATGCCCTG	1854	"deoxyuridine 5'-triphosphate nucleotidohydrolase, mitochondrial isoform 2"	8.71357	10.3347
ASHGA5P028260	0.0361588	0.0878411	3.07495	down	protein_coding	ENST00000342331	CCDS31894.2	ASCL4	GENCODE	2260	chr12	+	108168161	108170421	GTGTAGCTCTCCATCTAAGTTTTGGATAAACTGAAGTGGCACTGTGACTTTAAAAATAAA	121549	achaete-scute complex homolog 4 (Drosophila) [Source:HGNC Symbol;Acc:24311]	4.67459	6.29515
ASHGA5P009686	0.0116188	0.0452016	3.07441	down	protein_coding	NM_001079858	CCDS43923.1	GPR64	RefSeq	4895	chrX	-	19007424	19140755	TGATAATTCCAGTTTGTCACCACCACCTGCTAAATTATCTGTTGTCAGTTTTGCCCCCTC	10149	G-protein coupled receptor 64 isoform 1 precursor	5.08634	6.70665
ASHGA5P054731	0.00307122	0.0207885	3.07125	down	protein_coding	ENST00000256186	CCDS41620.1	MICALCL	GENCODE	3044	chr11	+	12308446	12380691	ATTCATCTTCCCCACCATCTTCTTCTTCAACCAGTGTTTCTGGGAATGCTCCAGATGGTT	84953	MICAL C-terminal like [Source:HGNC Symbol;Acc:25933]	5.19825	6.81707
ASHGA5P008519	0.000369591	0.00633082	3.06635	down	protein_coding	NM_181359	CCDS1068.1	IL6R	RefSeq	5834	chr1	+	154377668	154441926	ACAAGCCTCCCAGGTTCAAGAAGACGTGGAAGCTGCGGGCTCTGAAGGAAGGCAAGACAA	3570	interleukin-6 receptor subunit alpha isoform 2 precursor	2.70995	4.32647
ASHGA5P010884	0.00721433	0.0336042	3.06616	down	protein_coding	NM_030916	CCDS1216.1	PVRL4	RefSeq	3520	chr1	-	161040780	161059385	TCCTCCACGTGTCCTTCCTTGCTGAGGCCTCTGTGAGGGGCCTTGAAGACCAAAATCTGT	81607	poliovirus receptor-related protein 4 precursor	4.1751	5.79153
ASHGA5P038119	0.00376036	0.0233914	3.04908	down	protein_coding	NM_004628	CCDS46763.1	XPC	RefSeq	3729	chr3	-	14186647	14220172	AAAGTACAGCCTTCTCTCGATCTCTTCTGCCTGTGAAGCCAGTGGAGATAGAGATTGAAA	7508	DNA repair protein complementing XP-C cells isoform 1	3.92517	5.53354
ASHGA5P052342	0.011586	0.0451517	3.03419	down	protein_coding	NM_183001	CCDS30881.1	SHC1	RefSeq	3493	chr1	-	154934773	154943223	AGTACAATCCACTCCGGAATGAGTCTCTGTCATCGCTGGAGGAAGGGGCTTCTGGGTCCA	6464	SHC-transforming protein 1 isoform 1	6.30305	7.90436
ASHGA5P021168	0.00312837	0.0209801	3.03363	down	protein_coding	NM_001164470	CCDS53638.1	MS4A12	RefSeq	1044	chr11	+	60260250	60274901	TTAAAGAAGAAGCAAAGGCACTAGGGTTTATTATCTCTGGCTCTCTCTCTGTGTCAGCAT	54860	membrane-spanning 4-domains subfamily A member 12 isoform 2	5.22344	6.82448
ASHGA5P050854	0.00382835	0.023636	3.0309	down	protein_coding	NM_022049	CCDS772.1	GPR88	RefSeq	3465	chr1	+	101003727	101007583	TGAAGAGTTGGCCAGAATGACCAACTCCTCCTCCACATCCACCTCCTCCACCACCGGTGG	54112	probable G-protein coupled receptor 88	6.8347	8.43445
ASHGA5P009604	0.00756314	0.0344979	3.02942	down	protein_coding	NM_002816	CCDS11669.1	PSMD12	RefSeq	1814	chr17	-	65336618	65362721	TTGAAACCCTTCTCTCTCTGGAAAAGCAGACTCGTACTGCTTCCGATATGGTATCGACAT	5718	26S proteasome non-ATPase regulatory subunit 12 isoform 1	4.04641	5.64546
ASHGA5P020660	0.0104604	0.0422356	3.02535	down	protein_coding	NM_001165039	CCDS55207.1	GFRA2	RefSeq	2977	chr8	-	21549529	21646346	ATTTAACATGATCTTGGCAAACGTCTTCTGCCTCTTCTTCTTTCTAGGGACAGGGGCAGA	2675	GDNF family receptor alpha-2 isoform c precursor	5.97351	7.57061
ASHGA5P007644	0.0172033	0.0574281	3.02434	down	protein_coding	ENST00000335304	CCDS3251.1	HTR3E	GENCODE	1912	chr3	+	183817966	183824783	CTCTTGTCATCATTCCTGTGGCTGGAAATGGTTTGGGATAACCCATTTATCAGCTGGAAC	285242	"5-hydroxytryptamine (serotonin) receptor 3E, ionotropic [Source:HGNC Symbol;Acc:24005]"	3.85753	5.45416
ASHGA5P007553	4.09681e-05	0.00174883	3.02245	down	protein_coding	NM_145290	CCDS33964.1	GPR125	RefSeq	4576	chr4	-	22388998	22517672	GGCACTAAAGAATACTATTGTGGAGGCTTCTATTCAGCTTCCTCCTTCCCTTTTCTCACC	166647	probable G-protein coupled receptor 125 precursor	4.96793	6.56365
ASHGA5P043894	0.000179561	0.00406672	3.02167	down	protein_coding	NM_001193321	CCDS53464.1	IKBKE	RefSeq	3373	chr1	+	206643585	206670223	GGCCTCGCCGCCTCCCATAGCTCCTTACCCCAGCCCTACACGAAAGGACCTGCTTCTCCA	9641	inhibitor of nuclear factor kappa-B kinase subunit epsilon isoform 3	7.95061	9.54596
ASHGA5P045647	0.00216907	0.0170103	3.02094	down	protein_coding	NM_001010887	CCDS34992.1	ACER2	RefSeq	2852	chr9	+	19408924	19452500	ACAAGAAATCATCAGTCAAGATCACGTGATGGCAAGATGGTGGCTGGCTTCTCTGCTTAT	340485	alkaline ceramidase 2	2.99952	4.59451
ASHGA5P007976	0.0099376	0.0408697	3.01737	down	protein_coding	NM_031925		TMEM120A	RefSeq	1497	chr7	-	75616154	75623992	AGGAGTGGCAGGTGCTTATGTGCGGCTTTCCCTTCCTCCTCCTTTTCCTCGGCAATTTCT	83862	transmembrane protein 120A	7.98901	9.58231
ASHGA5P049392	0.00716219	0.0334531	3.00977	down	protein_coding	ENST00000325921	CCDS10993.1	PRDM7	GENCODE	2442	chr16	-	90122973	90128733	AATCCCTGCTTCCCTCACTTCCAGATTGTGAGATGTGTCAGAACTTCTTCATTGACAGCT	11105	PR domain containing 7 [Source:HGNC Symbol;Acc:9351]	6.36331	7.95296
ASHGA5P051648	0.000644267	0.00880855	3.00555	down	protein_coding	NM_001145152	CCDS47811.1	VPS37A	RefSeq	4510	chr8	+	17104400	17155533	TGCTTCTCAGGGTTTTCCATTTCTTCCTCCATATCCTCCACAAGAAGCAAACAGGAGTAT	137492	vacuolar protein sorting-associated protein 37A isoform 2	3.8929	5.48052
ASHGA5P055963	0.000517072	0.00775761	2.99164	down	protein_coding	NM_138638	CCDS9649.1	CFL2	RefSeq	3267	chr14	-	35179587	35184029	TCCCAGTGCCACAGAGCCGAAGCCCGAGCTGCCGCCGCAGCCACAGCCGAGGGCACTATG	1073	cofilin-2 isoform 1	5.06469	6.64563
ASHGA5P031487	0.00417726	0.0250611	2.9856	down	protein_coding	ENST00000445369	CCDS10487.1	CLDN9	GENCODE	2050	chr16	+	3062456	3064506	CACCTCCCTCTCCCCAACATCCCCACCCTCGAGTTGGAAATAAAGAGCATTTGTAACTGG	9080	claudin 9 [Source:HGNC Symbol;Acc:2051]	11.1941	12.7721
ASHGA5P009255	0.00145334	0.0135553	2.98115	down	protein_coding	NM_002000	CCDS12907.1	FCAR	RefSeq	1671	chr19	+	55385548	55401839	GTGGTCACAGACTCCATCCACCAAGATTACACGACGCAGAACTTGATCCGCATGGCCGTG	2204	immunoglobulin alpha Fc receptor isoform a precursor	5.51684	7.09271
ASHGA5P053080	0.000215259	0.00454005	2.97746	down	protein_coding	NM_001013398	CCDS34632.1	IGFBP3	RefSeq	2638	chr7	-	45951843	45960871	GCCGCCTGCGCGCCTACCTGCTGCCAGCGCCGCCAGCTCCAGGTGAGCCGCCCGCGCCAG	3486	insulin-like growth factor-binding protein 3 isoform a precursor	7.09894	8.67302
ASHGA5P053807	0.00155932	0.0141829	2.97331	down	protein_coding	NM_001018003	CCDS47824.1	SORBS3	RefSeq	2057	chr8	+	22423178	22433008	AACGTTCCCTGGAAATTACGTTGCCCCGGTGTGAGTGGTCTCCATGGCAACTTGGAGCCA	10174	vinexin isoform 2	4.03188	5.60395
ASHGA5P005761	0.00379222	0.0235267	2.97083	down	protein_coding	NM_030963	CCDS5136.1	RNF146	RefSeq	2400	chr6	+	127587982	127609705	TGATTTGCAGGATGGCTGGCTGTGGTGAAATTGATCATTCAATAAACATGCTTCCTACAA	81847	E3 ubiquitin-protein ligase RNF146 isoform a	5.6053	7.17617
ASHGA5P055513	0.000801575	0.00968477	2.96787	down	protein_coding	ENST00000376132	CCDS41257.1	PRAMEF13	GENCODE	2164	chr1	-	13447413	13452656	TTTTCTCCAGGTGCCATCATTCCATGTCAGATAATGAACTCGAAGGACGGTTAGTCACCA	400736	PRAME family member 13 [Source:HGNC Symbol;Acc:13262]	2.89362	4.46305
ASHGA5P009822	0.0197012	0.0621481	2.96621	down	protein_coding	NM_018070	CCDS590.1	SSBP3	RefSeq	2014	chr1	-	54692194	54871979	CCACAGTCAGCCTCCGGGAGGAGTTCCTGGGACACAGCCATTGCTGCCCAATTCTATGGA	23648	single-stranded DNA-binding protein 3 isoform b	3.63485	5.20348
ASHGA5P008981	0.0252878	0.0724225	2.94924	down	protein_coding	NM_198195	CCDS2910.1	UBA3	RefSeq	2094	chr3	-	69103880	69129524	ATGGCGAGGAGCCAATGGCTGTTGATGGTGGGTGTGGGGACACTGGAGACTGGGAAGGTC	9039	NEDD8-activating enzyme E1 catalytic subunit isoform 2	2.84925	4.4096
ASHGA5P054936	0.00683486	0.0326273	2.93478	down	protein_coding	NM_006819	CCDS8058.1	STIP1	RefSeq	2219	chr11	+	63953586	63972020	ATTCGGTGATGACTTGTTCATCCCCCCTTCCCTTCGCCCTCATGTGGAAAGAGGAGCTGG	10963	stress-induced-phosphoprotein 1	9.48234	11.0356
ASHGA5P013754	0.00689098	0.0327418	2.92549	down	protein_coding	NM_001040114	CCDS45423.1	MYH11	RefSeq	6903	chr16	-	15796991	15950887	GCCTCCTCCCACAAGGGCAAGAAAGACACAAGTATCACGCAAGGCCCATCTTTTGCCTAC	4629	myosin-11 isoform SM1B	5.94874	7.49742
ASHGA5P026964	0.00132377	0.0128676	2.92	down	protein_coding	ENST00000339235	CCDS8509.1	FBXL14	GENCODE	2111	chr12	-	1675158	1703331	TCAAGTCTCTCTCCCTCTGCTCCTGCCACATCAGTGATGATGGCATCAACCGCATGGTGC	144699	F-box and leucine-rich repeat protein 14 [Source:HGNC Symbol;Acc:28624]	9.14914	10.6951
ASHGA5P004904	0.00022591	0.00470622	2.91323	down	protein_coding	NM_006157	CCDS7855.1	NELL1	RefSeq	3255	chr11	+	20691116	21597229	TATTCACTGTCCGGGGAGTCCTGTATTGACATTGATGAATGTGCCTTAAGAACTCACACC	4745	protein kinase C-binding protein NELL1 isoform 1 precursor	2.82239	4.365
ASHGA5P007138	0.000167369	0.0039194	2.90832	down	protein_coding	NM_148901	CCDS9.1	TNFRSF18	RefSeq	1003	chr1	-	1138887	1142089	CTTGGACAGACTGCTGCTGGAGGTGCCGCCGTCGACCGAAGACGCCAGAAGCTGCCAGTT	8784	tumor necrosis factor receptor superfamily member 18 isoform 2 precursor	3.87363	5.41382
ASHGA5P012035	0.0136362	0.0499192	2.90654	down	protein_coding	NM_153695	CCDS6718.1	ZNF367	RefSeq	3714	chr9	-	99148224	99180669	GGCTGGCGAGGTATTGGGAAATGAGAGAGCAGCGCACCCCCACTTTGAAAGGCAAGCTGG	195828	zinc finger protein 367	6.93647	8.47577
ASHGA5P034674	0.0104171	0.0421443	2.90443	down	protein_coding	ENST00000263284	CCDS46120.1	CCDC61	GENCODE	1825	chr19	+	46498338	46521874	CTCCCTTCCAGGCCCTCCCCACCACGTGGGCGCGGCCTACCCTCCCGCAGGGGGTAATAG		coiled-coil domain containing 61 [Source:HGNC Symbol;Acc:33629]	8.70045	10.2387
ASHGA5P017208	0.000456069	0.00721087	2.8903	down	protein_coding	NM_138496	CCDS47943.1	CYHR1	RefSeq	1670	chr8	-	145675314	145690418	ATTTCCACTGGTGTACTAATGGTCACTTGATGTGCGCTGGCTGTTTTATCCACCTACTAG	50626	cysteine and histidine-rich protein 1 isoform 1 precursor	2.99972	4.53094
ASHGA5P036342	0.000511868	0.00771876	2.88745	down	protein_coding	NM_012316	CCDS352.1	KPNA6	RefSeq	7373	chr1	+	32573643	32642168	GCCGCTGAAGCTGCCGCCGTTGCCTCCGCCGCCAAGAGTGAGCGAGCGGACCCGCGATGG	23633	importin subunit alpha-7	9.24867	10.7785
ASHGA5P037476	0.00129107	0.0127206	2.88686	down	protein_coding	NM_018962	CCDS13648.1	DSCR6	RefSeq	2260	chr21	+	38378862	38391958	CGGCTGTCACTGCCCCGGGGACGCTCCCTGGAGGCCTCCGCCACCGCGCGGGCCGGAGAG	53820	protein ripply3	3.28285	4.81235
ASHGA5P048176	0.000352189	0.00615394	2.8865	down	protein_coding	NM_153265	CCDS8023.2	EML3	RefSeq	3265	chr11	-	62369690	62380237	CCTCCTCCGCCGCCGCCGCTCGGAGCAACCCGGGGGCCGGATGGACGGGGCCGCGGGGCC	256364	echinoderm microtubule-associated protein-like 3	10.0029	11.5323
ASHGA5P012713	0.00261933	0.0189324	2.88568	down	protein_coding	NM_002915	CCDS9352.1	RFC3	RefSeq	2396	chr13	+	34392205	34411644	AATAATGAAGGGCCTTCTCTCAGAACTGTTACATAATTGTGATGGACAACTGAAAGGGGA	5983	replication factor C subunit 3 isoform 1	3.53824	5.06715
ASHGA5P001426	2.10444e-05	0.00117791	2.88426	down	protein_coding	NM_003118	CCDS4318.1	SPARC	RefSeq	3604	chr5	-	151040656	151066615	ATCAAGCAGAAGGATATCGACAAGGATCTTGTGATCTAAATCCACTCCTTCCACAGTACC	6678	SPARC precursor	3.29072	4.81892
ASHGA5P003681	0.0407895	0.0941247	2.88341	down	protein_coding	NM_032316	CCDS2798.1	NICN1	RefSeq	3227	chr3	-	49459765	49466757	CCGCTTTGATGTGGATGGCTGTTATGACCTGAACTTGCTCTCCTACACTTGAATGGTTGC	84276	nicolin-1	5.01393	6.54171
ASHGA5P019220	7.19342e-05	0.00236457	2.88225	down	protein_coding	NM_182697	CCDS47710.1	UBE2H	RefSeq	5081	chr7	-	129470572	129592800	CCATCTATAGATCTTACCAATATATTTGAGTCCTTCCTGCCTCAGTTATTGGCCTATCCT	7328	ubiquitin-conjugating enzyme E2 H isoform 2	3.69084	5.21804
ASHGA5P005935	0.00235402	0.0177986	2.87122	down	protein_coding	NM_001171818	CCDS4803.1	PPARD	RefSeq	3845	chr6	+	35310334	35395968	ATGGGGGACCACAGCATGCACTTCCTTCCAGCAGCTACACAGACCTCTCCCGGAGCTCCT	5467	peroxisome proliferator-activated receptor delta isoform 1	4.61707	6.13873
ASHGA5P002052	0.000827016	0.00987668	2.86841	down	protein_coding	NM_005931	CCDS43449.1	MICB	RefSeq	2497	chr6	+	31465854	31478901	GCCGCCGCTGAGCCCCACAGTCTTCGTTACAACCTCATGGTGCTGTCCCAGGATGGATCT	4277	MHC class I polypeptide-related sequence B precursor	9.10132	10.6216
ASHGA5P002300	0.0219454	0.0665099	2.86739	down	protein_coding	NM_001423	CCDS8660.1	EMP1	RefSeq	2804	chr12	+	13349601	13369708	CTGGTGTGCTGGCTGTGCATTCTTGTGGGGGTGTCCATCTACACTAGTCATTATGCGAAT	2012	epithelial membrane protein 1	5.50858	7.02831
ASHGA5P052452	0.034272	0.0853218	2.86571	down	protein_coding	NM_001387	CCDS43381.1	DPYSL3	RefSeq	5066	chr5	-	146770370	146833260	GCTGCAGCCACCACCGCCACCATGTCCTACCAAGGCAAGAAGAACATCCCGCGGATCACG	1809	dihydropyrimidinase-related protein 3 isoform 2	6.77597	8.29486
ASHGA5P004481	0.00498695	0.0276152	2.8638	down	protein_coding	NM_018273	CCDS12716.1	TMEM143	RefSeq	2265	chr19	-	48835615	48867186	CCGGCTGCAGGCCTTATATGACCCCATCAACCCTGACAGGGAGACCCTCGATCAGCCATC	55260	transmembrane protein 143	4.60201	6.11994
ASHGA5P019100	0.0179337	0.0589133	2.86309	down	protein_coding	NM_023924	CCDS34127.2	BRD9	RefSeq	2699	chr5	-	863849	892939	AGCGTGCCGGACACAGCCAGCCGAAAATGAGAGCACACCTATTCAGCAACTCCTGGAACA	65980	bromodomain-containing protein 9 isoform 1	3.23354	4.75112
ASHGA5P005563	0.00903692	0.0386641	2.86227	down	protein_coding	NM_003711	CCDS34159.1	PPAP2A	RefSeq	1638	chr5	-	54720682	54830873	GTGTTGCTGGCTGGATTGCCTTTTGCAATTCTTACTTCAAGGCATACCCCCTTCCAACGA	8611	lipid phosphate phosphohydrolase 1 isoform 1	7.2089	8.72606
ASHGA5P043857	0.0138093	0.0503132	2.85829	down	protein_coding	ENST00000358184	CCDS1462.1	CTSE	GENCODE	2228	chr1	+	206317458	206332104	TTCCCTCATCACTGGCCCTTCCGACAAGATTAAGCAGCTGCAAAACGCCATTGGGGCAGC	1510	cathepsin E [Source:HGNC Symbol;Acc:2530]	7.04925	8.5644
ASHGA5P012840	0.00321825	0.0214137	2.85818	down	protein_coding	NM_001135565	CCDS48076.1	HDHD1	RefSeq	2224	chrX	-	6966960	7066231	TCTCCCCCTCCTGCTATGGAGAAGTGCCTTGTCTTTGAAGATGCTCCCAATGGGGTGGAG	8226	pseudouridine-5'-monophosphatase isoform a	9.12459	10.6397
ASHGA5P041737	0.00495664	0.0275168	2.8558	down	protein_coding	NM_021903	CCDS4665.1	GABBR1	RefSeq	4297	chr6	-	29570004	29596005	CCTCCCACTCCCCCCATCTCCCGCGGCCTCACTCGCGGGTCCCCCCGCACCCCTCCTCAG	2550	gamma-aminobutyric acid type B receptor subunit 1 isoform b precursor	12.0926	13.6065
ASHGA5P013647	0.0148169	0.0525009	2.84952	down	protein_coding	NM_001030288	CCDS10650.1	SPN	RefSeq	6944	chr16	+	29674270	29681823	TGCCTCCCTCAGGTCCCAGCTCTTGCTCCTGCCTGTTTGCCTGGAAATGGCCACGCTTCT	6693	leukosialin precursor	7.53057	9.04129
ASHGA5P003845	0.0359649	0.0876704	2.84936	down	protein_coding	NM_006757	CCDS7727.1	TNNT3	RefSeq	1217	chr11	+	1940798	1959936	AGCCCTTCTCACACTCGACCCGCAGAAACCACCCACCTTCACCATGTCTGACGAGGAAGT	7140	"troponin T, fast skeletal muscle isoform 1"	7.88867	9.39931
ASHGA5P051782	0.00279483	0.0196507	2.8481	down	protein_coding	NM_181361	CCDS3223.1	KCNMB2	RefSeq	2543	chr3	+	178254223	178562217	TCTTCCGGGGAAAAGCTCCTCCTCTACCACACAGAAGAGACAATAAAAATCAATCAGAAG	10242	calcium-activated potassium channel subunit beta-2	4.75154	6.26154
ASHGA5P049067	0.00735616	0.0339697	2.84737	down	protein_coding	NM_001130006	CCDS45413.1	GSPT1	RefSeq	7166	chr16	-	11961984	12009825	GTCCACCACACACACGGCCCCCCCGATCATGGATCCGGGCAGTGGCGGCGGCGGCGGCGG	2935	eukaryotic peptide chain release factor GTP-binding subunit ERF3A isoform 2	9.30419	10.8138
ASHGA5P007465	0.017338	0.0577287	2.83635	down	protein_coding	ENST00000333206	CCDS42427.1	ZSCAN30	GENCODE	4128	chr18	-	32831022	32870196	CAGGAGAGAGATGGCAGGATGGTGGCTGGCAAAGTGTTGATGGCAAAGCAAGAAATTGTT	100101467	zinc finger and SCAN domain containing 30 [Source:HGNC Symbol;Acc:33517]	2.98007	4.48411
ASHGA5P051693	0.00261792	0.0189324	2.83347	down	protein_coding	NM_001679	CCDS3121.1	ATP1B3	RefSeq	1853	chr3	+	141595469	141645382	CTCCTCTCGCCGTCCGCGCGCACACCATGACGAAGAACGAGAAGAAGTCCCTCAACCAGA	483	sodium/potassium-transporting ATPase subunit beta-3	4.50729	6.00986
ASHGA5P029419	0.0012162	0.0123278	2.82469	down	protein_coding	ENST00000315543	CCDS32030.1	OR4K17	GENCODE	1032	chr14	+	20585565	20586597	GCTGTGTTTTATACCATCATCACTCCTATCTTGAATCCAATTATCTATACTCTGAGAAAC	390436	"olfactory receptor, family 4, subfamily K, member 17 [Source:HGNC Symbol;Acc:15355]"	2.79225	4.29035
ASHGA5P036896	0.00171951	0.0149216	2.8094	down	protein_coding	ENST00000370053	CCDS13529.1	STMN3	GENCODE	2255	chr20	-	62271060	62284780	GCGCCTCTCCAGCCTCCGCAGGCCCAACCGCCGCCAGCACCATGGCCAGCACCATTTCCG	50861	stathmin-like 3 [Source:HGNC Symbol;Acc:15926]	7.21431	8.70457
ASHGA5P014020	0.000113318	0.00302985	2.80388	down	protein_coding	ENST00000398718	CCDS43472.1	DEFB113	GENCODE	249	chr6	-	49936389	49937338	TGTATTTTTCTGACCTTTGTCTTCACTGTGTCTTGTGGTCCATCAGTTCCACAGAAAAAA	245927	"defensin, beta 113 [Source:HGNC Symbol;Acc:18094]"	2.88836	4.37578
ASHGA5P050550	0.0192004	0.0612414	2.80127	down	protein_coding	ENST00000340326	CCDS1976.1	SH2D6	GENCODE	894	chr2	+	85661917	85664152	CTTCTTCTAGAAGGAAGGAAATCGTCTCTTCCCTCTGTAGCCCCCACTGGGAGTGCCTCA	284948	SH2 domain containing 6 [Source:HGNC Symbol;Acc:30439]	10.9303	12.4163
ASHGA5P041260	0.030307	0.07953	2.79984	down	protein_coding	NM_005575	CCDS4087.1	LNPEP	RefSeq	4470	chr5	+	96271345	96365115	GCTCGGGCGCTCCGGCTGTAAGGAGCCGCGGCGGGGGGAAAATGGAGCCCTTCACCAATG	4012	leucyl-cystinyl aminopeptidase isoform 1	5.95902	7.44436
ASHGA5P050038	0.000272243	0.0051853	2.79766	down	protein_coding	NM_004368	CCDS12053.1	CNN2	RefSeq	2478	chr19	+	1026297	1039064	GCGGCCCCGTCCCGCCGCCCGCCCGCCAGCCATGAGCTCCACGCAGTTCAACAAGGGCCC	1265	calponin-2 isoform a	10.0456	11.5298
ASHGA5P004935	2.5178e-05	0.00129539	2.79325	down	protein_coding	NM_152647	CCDS32237.1	FAM227B	RefSeq	2009	chr15	-	49620591	49913118	TCCAGGAACCACTACCTGCTCCAACATACCGTGATGTTATAAAGGAGGCAAAAAGACAAT	196951	uncharacterized protein C15orf33	2.80941	4.29135
ASHGA5P050884	0.0170048	0.0570637	2.78808	down	protein_coding	NM_001167599	CCDS54441.1	NEU4	RefSeq	2373	chr2	+	242752029	242758739	AGTGGGCCCCGGGAGTCCCCTCCAGCCTCCACTCCTCGGTCCTGGAGTCCACGAACCCCC	129807	sialidase-4 isoform 2	8.39288	9.87215
ASHGA5P010983	0.00768724	0.034878	2.78285	down	protein_coding	NM_001143758	CCDS44495.1	LRRC27	RefSeq	1798	chr10	+	134145613	134166901	AGCAGAGACGTCCTTTCCTCCTCATTTTCCCTAGAGTATTCCAGGCCCTGACACGGTCAT	80313	leucine-rich repeat-containing protein 27 isoform b	4.82098	6.29754
ASHGA5P002971	0.020187	0.0632197	2.78024	down	protein_coding	NM_002344	CCDS10077.1	LTK	RefSeq	3143	chr15	-	41795839	41806085	GGGGCGGCAGGTGGTGGGGGCGGCTGGACGTCGCGGGCTCCCTCTCCGCAGGCCGGCCGC	4058	leukocyte tyrosine kinase receptor isoform 1 precursor	6.14972	7.62493
ASHGA5P011480	0.000503738	0.007682	2.77553	down	protein_coding	NM_001012727	CCDS35181.1	AGPAT2	RefSeq	1480	chr9	-	139567594	139581911	CAGGGAGAACGTGCCCATCGTCCCCGTGGTGTACTCTTCCTTCTCCTCCTTCTACAACAC	10555	1-acyl-sn-glycerol-3-phosphate acyltransferase beta isoform b precursor	7.2308	8.70356
ASHGA5P017996	0.000681871	0.00898511	2.77388	down	protein_coding	NM_001083113	CCDS13535.1	ZGPAT	RefSeq	1925	chr20	+	62338793	62367494	CAGGCGCCGGCCCTGGTCCAGCGCCTCCCTCTCTCAGCATGGACGAGGAGAGCCTGGAGT	84619	zinc finger CCCH-type with G patch domain-containing protein isoform c	4.50754	5.97944
ASHGA5P052657	0.00508727	0.0279224	2.76847	down	protein_coding	NM_032955	CCDS34398.1	AIF1	RefSeq	503	chr6	+	31583788	31584798	ATCCCTTCTGCTCTCTCCCCTCACCCAGAGAAATACATGGAGTTTGACCTTAATGGAAAT	199	allograft inflammatory factor 1 isoform 1	9.74193	11.211
ASHGA5P050617	0.00864103	0.0375538	2.76488	down	protein_coding	ENST00000439055	CCDS46389.1	ACOXL	GENCODE	2373	chr2	+	111490149	111875799	GGTGATCTCGACCTTTAACATTCCACACACCTACCTCCACGCACCAATCGCCGGAATCTC	55289	acyl-CoA oxidase-like [Source:HGNC Symbol;Acc:25621]	6.61787	8.08509
ASHGA5P007670	0.0161619	0.0553231	2.75936	down	protein_coding	ENST00000458694	CCDS34449.1	PRICKLE4	GENCODE	1646	chr6	+	41748499	41755110	AAGGAAGCAGGCTTTGCCACAAATGTCAGTGCAGAACTCTGGCTGGCCCCACCAAGAAGA	29964	prickle homolog 4 (Drosophila) [Source:HGNC Symbol;Acc:16805]	8.1092	9.57353
ASHGA5P004744	0.00756905	0.0344993	2.75731	down	protein_coding	NM_006706	CCDS4282.1	TCERG1	RefSeq	4233	chr5	+	145826872	145891069	CCAATTCCACTTCCAGGTGTAGCAATGATGCAAATAGTCAGCTGCCCGTATGTAAAGACA	10915	transcription elongation regulator 1 isoform 1	3.67717	5.14043
ASHGA5P006241	0.0178493	0.0587689	2.75623	down	protein_coding	ENST00000316097	CCDS45903.1	SCAMP4	GENCODE	2526	chr19	+	1905372	1926012	GGGGCGCGTGCGGCTGGCTGTCGGCAATTGGATTCTTCCAGTACAGCCCGGGCGCTGCCG	113178	secretory carrier membrane protein 4 [Source:HGNC Symbol;Acc:30385]	3.30093	4.76362
ASHGA5P010004	0.00559413	0.0291794	2.75271	down	protein_coding	NM_001134937	CCDS47055.1	FIP1L1	RefSeq	2440	chr4	+	54243819	54326103	CCACCTCCAGGTTTTCCTCCTCCACCAGGCGCTCCACCTCCATCTCTTATACCAACAATA	81608	pre-mRNA 3'-end-processing factor FIP1 isoform 2	7.97656	9.43742
ASHGA5P041421	0.0131755	0.0489671	2.75211	down	protein_coding	NM_031860	CCDS34255.1	PCDHA10	RefSeq	4465	chr5	+	140235633	140391929	AATTCACCTGAGGTGATTGTCACTTCTCTGTCTCTCCCAGTGAAAGAAGATGCTCAAGTG	56139	protocadherin alpha-10 isoform 3 precursor	6.07856	7.53909
ASHGA5P047815	0.000107362	0.0029704	2.74935	down	protein_coding	NM_001004325	CCDS31331.1	KRTAP5-2	RefSeq	1149	chr11	-	1618406	1619524	TGGCCCAAGTGTGACCAGGAAGGTCTCTTTCCTTCCTGTTGTCTCCATCTGTTTAAAAAA	440021	keratin-associated protein 5-2	3.66036	5.11945
ASHGA5P004307	0.0285982	0.0773382	2.74924	down	protein_coding	NM_020125	CCDS1188.1	SLAMF8	RefSeq	3316	chr1	+	159796478	159807282	CTCTGGGAAGCCCTACTTCCCATTACAGTTACTGGTGCCCAAGTGCTGAGCAAAGTCGGG	56833	SLAM family member 8 precursor	4.39463	5.85366
ASHGA5P008814	0.00279884	0.0196633	2.74885	down	protein_coding	NM_017974	CCDS2502.2	ATG16L1	RefSeq	3354	chr2	+	234160216	234204320	GAGCAGCCACGAGACGCTCTGTCTCTTCCTTCCCAGTCCCCCAGGACAATGTGGATACTC	55054	autophagy-related protein 16-1 isoform 2	6.20854	7.66737
ASHGA5P054640	0.00690524	0.0327637	2.74804	down	protein_coding	NM_003641	CCDS41584.1	IFITM1	RefSeq	733	chr11	+	313990	315272	CAACACTTCCTTCCCCAAAGCCAGAAGATGCACAAGGAGGAACATGAGGTGGCTGTGCTG	8519	interferon-induced transmembrane protein 1	5.96859	7.42699
ASHGA5P007966	0.0046278	0.0264669	2.74437	down	protein_coding	NM_001002031	CCDS31812.1	ATP5G2	RefSeq	1178	chr12	-	54058943	54070512	GATGCCTGAGCTGATCCTCTCTCCTGCCACAGCTCCTCACCCCCTGAAAATGTTCGCCTG	517	"ATP synthase lipid-binding protein, mitochondrial isoform a precursor"	8.33574	9.79222
ASHGA5P013567	0.00481731	0.0270349	2.74281	down	protein_coding	NM_001099922	CCDS55477.1	ALG13	RefSeq	4179	chrX	+	110924345	111003875	GGCAGGCCAGTGATTGCCTCACCATCCTATCCATGCCATTCTGCTATTCCTCATGCTGGT	79868	UDP-N-acetylglucosamine transferase subunit ALG13 homolog isoform 1	4.68757	6.14323
ASHGA5P049246	0.043304	0.0974094	2.74077	down	protein_coding	NM_020807	CCDS32462.1	ZNF319	RefSeq	4220	chr16	-	58028572	58033762	CCTGCCCTGACTCTGCGGCTGTGGCCCCTACCAGCCTGACCTGAGTCGGCGCCGTGGGCC	57567	zinc finger protein 319	7.74322	9.19781
ASHGA5P014699	0.00079319	0.00966516	2.73776	down	protein_coding	NM_006700	CCDS9160.1	TRAFD1	RefSeq	2665	chr12	+	112563348	112591408	TTTCTCCTCTCGTCCCTGGAAGAGCTAAAGATGGCTGAATTTCTAGATGACCAGGAAACT	10906	TRAF-type zinc finger domain-containing protein 1	3.81555	5.26854
ASHGA5P053970	0.000474144	0.00745387	2.72992	down	protein_coding	NM_006950	CCDS14280.1	SYN1	RefSeq	3210	chrX	-	47431299	47479256	AACCTTCCAGAGCCAGCCCCGCCCAGGCCCAGCCTTAGCCAGGACGAGGTGAAAGCTGAG	6853	synapsin-1 isoform Ia	7.38173	8.83059
ASHGA5P007639	0.0230547	0.068717	2.72662	down	protein_coding	NM_181291	CCDS9968.1	WDR20	RefSeq	2620	chr14	+	102606188	102690010	GATTTATTTGCACATGGGGAAGGCCTGGTAAAGTGGGCTCATTGTCATCCCCAAGCCAGG	91833	WD repeat-containing protein 20 isoform 1	3.93737	5.38449
ASHGA5P050268	0.00260274	0.0188579	2.72505	down	protein_coding	NM_012423	CCDS12768.1	RPL13A	RefSeq	1196	chr19	+	49990810	49995564	AAGGGATAAGAAACCCTGCGACAAAACCTCCTCCTTTTCCAAGCGGCTGCCGAAGATGGC	23521	60S ribosomal protein L13a isoform 1	5.07765	6.52393
ASHGA5P006578	0.00646689	0.0316602	2.72461	down	protein_coding	NM_002113	CCDS1386.1	CFHR1	RefSeq	1312	chr1	+	196788860	196801319	GGCTGGTCCACCCCTCCCAAATGCAGGTCCACTGACACTTCCTGTGTGAATCCGCCCACA	3078	complement factor H-related protein 1 precursor	9.67437	11.1204
ASHGA5P010693	0.0420771	0.0958621	2.72203	down	protein_coding	NM_001135599	CCDS44318.1	TGFB2	RefSeq	5966	chr1	+	218518675	218617961	TACAAAATAGACATGCCGCCCTTCTTCCCCTCCGAAACTGTCTGCCCAGTTGTTACAACA	7042	transforming growth factor beta-2 isoform 1 precursor	9.27728	10.722
ASHGA5P034063	0.000725715	0.00925264	2.71997	down	protein_coding	ENST00000325084	CCDS45999.1	CACNA1A	GENCODE	8626	chr19	-	13317255	13617274	TATTACGAGTAATATCTCCCCCTCTCGGCTTAGGCAAGAAATGTCCTCATAGGGTTGCTT	773	"calcium channel, voltage-dependent, P/Q type, alpha 1A subunit [Source:HGNC Symbol;Acc:1388]"	8.97943	10.423
ASHGA5P006752	0.0143558	0.0515359	2.7185	down	protein_coding	NM_017871	CCDS21.1	CPSF3L	RefSeq	2168	chr1	-	1246964	1260067	TCCACCTCCACCAGACGGTCCAGGTAGATGATGAGCTGGAGATCAAGGCCTACTATGCAG	54973	integrator complex subunit 11 isoform 2	4.9485	6.39131
ASHGA5P009128	0.0046527	0.0265232	2.71451	down	protein_coding	NM_001135	CCDS53971.1	ACAN	RefSeq	8543	chr15	+	89346673	89418585	TGTAAAAAGGGCACAGCCACCACCTACAAACGCAGACTACAGAAGCGGAGCTCACGGCAC	176	aggrecan core protein isoform 1 precursor	3.6864	5.12709
ASHGA5P018250	0.00667431	0.0322233	2.71147	down	protein_coding	NM_001137560	CCDS47437.1	TMEM151B	RefSeq	4637	chr6	+	44238479	44247182	TATACCACCACCCAGGTCTACCACGAACGCGTCAACACGCACGTGGCGGAGGCTGAGTTC	441151	transmembrane protein 151B	5.35155	6.79062
ASHGA5P010800	0.0383178	0.0907862	2.70323	down	protein_coding	NM_001194999	CCDS53442.1	MR1	RefSeq	7725	chr1	+	181002560	181031074	AATCACTCAGATAATGTGGCTCACACCATCAAGCAGGCATGGGAGGCCAATCAGCATGAG	3140	major histocompatibility complex class I-related gene protein isoform 2 precursor	3.42835	4.86304
ASHGA5P009773	0.000678069	0.00898378	2.69883	down	protein_coding	NM_001017523	CCDS41827.1	BTBD11	RefSeq	3900	chr12	+	107974633	108053419	TCCCACTACTCTGGAATTCAGAGGCCCTTCCTCGTGCTGCCGCCGCTGATGGAGTGGATC	121551	ankyrin repeat and BTB/POZ domain-containing protein BTBD11 isoform b	6.13227	7.5646
ASHGA5P053045	0.0284597	0.0771676	2.69574	down	protein_coding	NM_001077473	CCDS53411.1	NR1I3	RefSeq	1120	chr1	-	161199455	161208000	TTTTTGGAGTTGCTCTTTCACTTCCATGGAACACTACGAAAACTGCAGCTCCAAGAGCCT	9970	nuclear receptor subfamily 1 group I member 3 isoform 12	4.7814	6.21209
ASHGA5P011338	0.0045634	0.0263833	2.68894	down	protein_coding	NM_147175	CCDS48169.1	HS6ST2	RefSeq	4456	chrX	-	131760037	132095423	GACCGTCCAGGAACTTCCACTACATCACCATCCTCCGAGACCCAGTGTCCCGGTACTTGA	90161	heparan-sulfate 6-O-sulfotransferase 2 isoform S	5.0635	6.49054
ASHGA5P046791	0.000355855	0.00619674	2.68706	down	protein_coding	NM_000451	CCDS14107.1	SHOX	RefSeq	3757	chrY	+	535078	557558	GTTACAACCGCTGTAAAATGACGGAGAGAGAGAGAAAGAATCCCAGACATTAACGGTATT	6473	short stature homeobox protein isoform SHOXa	2.78935	4.21538
ASHGA5P010545	0.000120451	0.00313503	2.685	down	protein_coding	NM_181553	CCDS10815.1	CMTM3	RefSeq	1962	chr16	+	66638566	66647795	AGCCGCTGGGGTGTTTGGCTTCTTTGCTACCATCGTGTTTGCAACTGATTTCTACCTGAT	123920	CKLF-like MARVEL transmembrane domain-containing protein 3	3.33178	4.7567
ASHGA5P010914	0.00786486	0.0353884	2.68481	down	protein_coding	NM_001042586	CCDS41420.1	CD1E	RefSeq	1514	chr1	+	158323485	158327343	TGTTCCTCCTCTTCGAGGGTCTCTGCTGTCCTGGGGAAAATACAGCAGTGAAGCCAGAGG	913	"T-cell surface glycoprotein CD1e, membrane-associated isoform e precursor"	3.81292	5.23774
ASHGA5P046127	0.00501979	0.0277163	2.68098	down	protein_coding	NM_001184960	CCDS55383.1	SH3KBP1	RefSeq	3864	chrX	-	19552082	19689119	GGGAGTTCTGGGACCTTTTCAAACTGAAGAGAGGAGGCTGGCTGCATCATGGGAGAAGAG	30011	SH3 domain-containing kinase-binding protein 1 isoform c	3.04744	4.4702
ASHGA5P007882	0.0214165	0.0656376	2.68049	down	protein_coding	NM_014836	CCDS7261.1	RHOBTB1	RefSeq	4515	chr10	-	62629197	62704033	GTGTTCTGTTCTTCACTTCCAGCAAGCCAGAGTTTCATAAATGGACGCTGACATGGACTA	9886	rho-related BTB domain-containing protein 1	3.87804	5.30053
ASHGA5P055467	0.0184149	0.0598763	2.67746	down	protein_coding	ENST00000317269	CCDS8894.1	DNAJC14	GENCODE	3330	chr12	-	56214743	56223420	GCGGAAGAAAGTGAGGAGGCCCTTCCAACGTTGATGCCCCTTCTCTTTCCTCAAATCAAT	85406	"DnaJ (Hsp40) homolog, subfamily C, member 14 [Source:HGNC Symbol;Acc:24581]"	6.53907	7.95994
ASHGA5P012751	0.00204833	0.0165475	2.67413	down	protein_coding	NM_001035223	CCDS32910.1	RGL3	RefSeq	2553	chr19	-	11504731	11530018	CCACCTCCAGTGTGTCCCCAGGGTCACCCCCCTCAAGTCCTAGAAGCAGAGATGCTCCTG	57139	ral guanine nucleotide dissociation stimulator-like 3 isoform 2	9.46733	10.8864
ASHGA5P055869	0.0125084	0.047422	2.67373	down	protein_coding	NM_080687	CCDS9544.1	UPF3A	RefSeq	2303	chr13	+	115047058	115071291	GAGGTTTCGTCGGGGGCTGGCGGCTGCGGCTCGGCGGAGAGTGCGGCATGCGCTCGGAAA	65110	regulator of nonsense transcripts 3A isoform hUpf3pdelta	4.79192	6.21077
ASHGA5P034076	0.0147415	0.0522874	2.66492	down	protein_coding	ENST00000315576	CCDS32935.1	EMR2	GENCODE	6771	chr19	-	14843204	14889353	AAACCCATGCCACAGCTCCACCCACTGCCTCAACAACGTGGGCAGCTATCAGTGCCGCTG	30817	"egf-like module containing, mucin-like, hormone receptor-like 2 [Source:HGNC Symbol;Acc:3337]"	6.73046	8.14455
ASHGA5P048821	0.0012364	0.0124705	2.66401	down	protein_coding	NM_006791	CCDS32304.1	MORF4L1	RefSeq	1894	chr15	+	79165122	79190081	AGGGGGCGGTAGTCGGGGGTGGTGGGAGAAGGAGGAGGCGGCGAATCACTTATAAATGGC	10933	mortality factor 4-like protein 1 isoform 1	5.42885	6.84245
ASHGA5P013841	0.00107458	0.0113519	2.66306	down	protein_coding	NM_006164	CCDS42782.1	NFE2L2	RefSeq	2859	chr2	-	178095030	178129859	ATGATGGACTTGGAGCTGCCGCCGCCGGGACTCCCGTCCCAGCAGGACATGGATTTGATT	4780	nuclear factor erythroid 2-related factor 2 isoform 1	8.16404	9.57713
ASHGA5P012204	0.000662921	0.00888109	2.659	down	protein_coding	ENST00000376462	CCDS41496.1	KIAA1217	GENCODE	6123	chr10	+	23983674	24836772	AAAGACAGAGAGACCAGAGAGAGGATGCAAGCCATGGAGAAACAGATTGCCAGTTTAACT	56243	KIAA1217 [Source:HGNC Symbol;Acc:25428]	3.13476	4.54565
ASHGA5P055010	0.00977037	0.0404673	2.65655	down	protein_coding	ENST00000398531	CCDS41684.1	KRTAP5-10	GENCODE	1058	chr11	+	71276608	71277666	GGCTCCAAAGGTGGCTGTGGTTCCTGTGGGGGCTCCAAGGGGGGCTGTGGTTCTTGTGGC	387273	keratin associated protein 5-10 [Source:HGNC Symbol;Acc:23605]	6.24128	7.65084
ASHGA5P020842	0.0235259	0.0696089	2.65245	down	protein_coding	NM_001161780	CCDS55262.1	PDP1	RefSeq	4247	chr8	+	94929161	94938296	ATCGTTTGGTCTCCTGCCGTGCCCGGAGAATGTGTGTGTGTCCCGGGCCCAGACGAATTG	54704	pyruvate dehyrogenase phosphatase catalytic subunit 1 isoform 2	4.99552	6.40284
ASHGA5P028876	0.000615322	0.00861028	2.64566	down	protein_coding	NM_001257995		LOC729420	RefSeq	1168	chr13	+	76445173	76457948	TCTCTGAATCGGATTTTCCTGGCTGTAGAGACCAGATCAACCCTTCCATTCCATCGATTT	729420	uncharacterized protein LOC729420	5.11822	6.52184
ASHGA5P005629	0.00611263	0.0305575	2.6449	down	protein_coding	NM_025124	CCDS8167.1	TMEM134	RefSeq	930	chr11	-	67231818	67236731	TGCTGCTGGGGCTGGTGCTGATCCTGGTCGGCGTGGGACTGGAGGCGACCCCCTCTCCAG	80194	transmembrane protein 134 isoform a	8.8964	10.2996
ASHGA5P030601	0.00122021	0.0123439	2.64262	down	protein_coding	ENST00000432196	CCDS45281.1	KBTBD13	GENCODE	3123	chr15	+	65369153	65372276	TTAGGAACCTAGTGCTGACCTCTGTTGTTGGATGAGGACTCTCGTTCCTTCATCAAAATC	390594	kelch repeat and BTB (POZ) domain containing 13 [Source:HGNC Symbol;Acc:37227]	2.90017	4.30213
ASHGA5P037258	5.58019e-05	0.00206242	2.63985	down	protein_coding	NM_181607	CCDS13594.1	KRTAP19-1	RefSeq	273	chr21	-	31852363	31852636	GGATATGGCTGCTGCCGCCCATCGTACAATGGAGGATACGGATTCTCTGGCTTTTATTAA	337882	keratin-associated protein 19-1	4.13718	5.53764
ASHGA5P049744	0.0169833	0.0570421	2.63932	down	protein_coding	NM_030802	CCDS11553.1	FAM117A	RefSeq	2385	chr17	-	47787686	47841518	TTGGGGGGCTGTGTGAGTCTCGCAGTGGGGCTGAGGCAGGCAGCCGGGAGAGCCATGGCG	81558	protein FAM117A	5.2377	6.63787
ASHGA5P001808	0.00120069	0.01221	2.633	down	protein_coding	NM_012155	CCDS12670.1	EML2	RefSeq	2275	chr19	-	46112657	46142675	CACCCGCCGCCATGAGTAGCTTTGGAGCTGGCAAAACCAAAGAAGTTATCTTCAGTGTGG	24139	echinoderm microtubule-associated protein-like 2 isoform 2	6.69358	8.09028
ASHGA5P051969	0.00668857	0.0322463	2.63266	down	protein_coding	NM_001145007	CCDS3541.1	MUC7	RefSeq	2504	chr4	+	71337674	71348714	TACACCAGCTCCACCATCTTCCTCAGCTCCACCAGAGACCACAGCTGCCCCACCCACACC	4589	mucin-7 precursor	7.30891	8.70543
ASHGA5P007215	0.000106465	0.0029704	2.6312	down	protein_coding	NM_031246	CCDS12616.1	PSG2	RefSeq	1612	chr19	-	43568361	43586893	AAAGTCTCTGCTTCTACAAGAATAGGACTTCTTCCTCTCCTTAATCCAACATAGCAGCTG	5670	pregnancy-specific beta-1-glycoprotein 2 precursor	3.92704	5.32277
ASHGA5P008338	0.00742803	0.0341622	2.63063	down	protein_coding	NM_001077395	CCDS41359.1	DPH5	RefSeq	1807	chr1	-	101455179	101491362	GAACTACCTACGATTCTCTCAGCGGTCTCTCTTCTCCTCAAGTTTGAAATGCTTTATCTC	51611	diphthine synthase isoform b	5.41614	6.81155
ASHGA5P030149	0.000419043	0.00684101	2.62926	down	protein_coding	NM_003612	CCDS10262.1	SEMA7A	RefSeq	3393	chr15	-	74701629	74726299	CCGCCGCCTCCGCCCAGGGCCACCTAAGGAGCGGACCCCGCATCTTCGCCGTCTGGAAAG	8482	semaphorin-7A isoform 1 preproprotein	8.7568	10.1515
ASHGA5P009395	0.00328045	0.0216297	2.62334	down	protein_coding	NM_001079668	CCDS41945.1	NKX2-1	RefSeq	2197	chr14	-	36985603	36989430	GCAGGCTCAGCCGCCGCCGAATCATGTCGATGAGTCCAAAGCACACGACTCCGTTCTCAG	7080	homeobox protein Nkx-2.1 isoform 1	6.92995	8.32136
ASHGA5P035286	0.00181702	0.0154597	2.62061	down	protein_coding	NM_017980	CCDS2147.1	LIMS2	RefSeq	2173	chr2	-	128395995	128422167	GGCCGCGTCGGGGCTGTACCGGCGGCGCCAGCACCGGCAGAGCCCGCCGCCAGCCACGGG	55679	LIM and senescent cell antigen-like-containing domain protein 2 isoform 2	3.2226	4.6125
ASHGA5P052542	0.0202773	0.0634098	2.61829	down	protein_coding	NM_014275	CCDS4448.1	MGAT4B	RefSeq	2482	chr5	-	179224597	179233952	CCTTCCTGACGCTGCTGCTCTTCTGCCTGTGCGCCTTCCTCTCGCTGTCCTGGTACGCGG	11282	"alpha-1,3-mannosyl-glycoprotein 4-beta-N-acetylglucosaminyltransferase B isoform 1 precursor"	7.00809	8.39672
ASHGA5P008176	9.27626e-05	0.00271544	2.61798	down	protein_coding	ENST00000453009	CCDS54522.1	IFT27	GENCODE	683	chr22	-	37154246	37164074	ATCTCTCTCCCAGGTGTTTTAGTTGGGAACAAGACAGACCTGGCCGGCAGACGAGCAGTG	11020	intraflagellar transport 27 homolog (Chlamydomonas) [Source:HGNC Symbol;Acc:18626]	5.78031	7.16877
ASHGA5P050801	0.00143494	0.0134591	2.61663	down	protein_coding	NM_005731	CCDS2410.1	ARPC2	RefSeq	1424	chr2	+	219082119	219119071	TCCTTCCCCTGGGGGCAGCCGCCGCCATGATCCTGCTGGAGGTGAACAACCGCATCATCG	10109	actin-related protein 2/3 complex subunit 2	6.85681	8.24452
ASHGA5P014002	0.000977773	0.0107912	2.61657	down	protein_coding	NM_018914	CCDS47294.1	PCDHGA11	RefSeq	4872	chr5	+	140800536	140892546	AAATGTGACCCGACAAGTAATCAGCAAGCCCCGCCCAACACGGACTGGCGTTTCTCTCAG	56105	protocadherin gamma-A11 isoform 1 precursor	6.51112	7.89879
ASHGA5P049993	0.00524455	0.028342	2.61529	down	protein_coding	ENST00000440549	CCDS45854.1	SLC39A6	GENCODE	1666	chr18	-	33690962	33709357	CTGCTGGCTTATTCATGTATGTTGCTCTGGTTGATATGGTAAGTTTTTAAGAAGTCTTAT	25800	"solute carrier family 39 (zinc transporter), member 6 [Source:HGNC Symbol;Acc:18607]"	3.47827	4.86524
ASHGA5P034320	0.00568989	0.0294827	2.61237	down	protein_coding	ENST00000378486		PLCH2	GENCODE	4837	chr1	+	2407753	2436964	TACTCCTCTGGGTTGGAGGGAGTGTGGTGCTGTCTTCAGAGTGGCAGCTCGGCCCCCTGG	9651	"phospholipase C, eta 2 [Source:HGNC Symbol;Acc:29037]"	3.42698	4.81234
ASHGA5P039777	0.0306517	0.0801461	2.60748	down	protein_coding	NM_176801	CCDS3364.1	ADD1	RefSeq	4097	chr4	+	2845583	2931802	ACCCTTGCTGCAGTCTCTCTCGTCCGGTGTCTGCGTGCCAAGCTGTATTACCAACTGCTT	118	alpha-adducin isoform d	5.6935	7.07616
ASHGA5P009432	0.0108512	0.0432306	2.6073	down	protein_coding	NM_153427	CCDS3693.1	PITX2	RefSeq	3110	chr4	-	111538579	111563279	CTGGTGTCGGCGTGTGTGCAATTAGAGAAAGATAAAAGCCAGCAGGGGAAGAATGAGGAC	5308	pituitary homeobox 2 isoform a	3.61557	4.99813
ASHGA5P039198	0.000334508	0.00593737	2.60696	down	protein_coding	NM_138345	CCDS54686.1	VWA5B2	RefSeq	4040	chr3	+	183948316	183960117	AGGCCGCCTGCTGCCGCGCTCTGGGCCCGGGGCTGGGGACCCCGACGCCCCGCCGCTGCG	90113	von Willebrand factor A domain-containing protein 5B2	6.89311	8.27548
ASHGA5P052152	0.000854426	0.0100277	2.60543	down	protein_coding	NM_024949	CCDS34109.2	WWC2	RefSeq	8822	chr4	+	184020462	184241929	GCCGCCGACCATGCCTAGGAGGGCCGGGAGCGGTCAGCTGCCGCTGCCCCGGGGCTGGGA	80014	protein WWC2	5.19611	6.57763
ASHGA5P003694	0.00186065	0.0156648	2.60169	down	protein_coding	NM_001128931	CCDS47159.1	NAF1	RefSeq	1635	chr4	-	164047859	164088073	CAGATGCATCATGGAAGAATGATCAGGAACCACCACCAGAGGCCTTAGATTTTAGTGATG	92345	H/ACA ribonucleoprotein complex non-core subunit NAF1 isoform b	4.07836	5.45781
ASHGA5P015312	0.0232924	0.0691779	2.59683	down	protein_coding	NM_001184748	CCDS53713.1	PAFAH1B2	RefSeq	2537	chr11	+	117014999	117047592	GCAGCCACAGGCGTGAGTCACCGCACCAGGCCATCTTCAGGTCATTTTAACAATACCCCT	5049	platelet-activating factor acetylhydrolase IB subunit beta isoform d	4.32532	5.70207
ASHGA5P034635	0.00214861	0.0169674	2.59612	down	protein_coding	NM_001130924	CCDS44055.2	TMEM201	RefSeq	3857	chr1	+	9648931	9674935	ATCTGTTCAGCGGTAGCCGCCCACCATCTCAGGTGTCTCGATCTGGGGAGTTTCCTGTTT	199953	transmembrane protein 201 isoform 1	4.54986	5.92621
ASHGA5P050781	0.00218065	0.0170686	2.58467	down	protein_coding	NM_006891	CCDS2378.1	CRYGD	RefSeq	724	chr2	-	208986330	208989313	GCTCAGCGCCGCCGCCCCACCAGCTCAGCACCGCCGTGCGCCCAGCCAGCCATGGGGAAG	1421	gamma-crystallin D	9.25549	10.6255
ASHGA5P026741	8.51297e-05	0.00262793	2.58357	down	protein_coding	ENST00000458427	CCDS8308.1	JRKL	GENCODE	3570	chr11	+	96123157	96126727	GTATAAGTTAAAGAAAGGCCTGTTCTCTCAAACTTCCTCCTCTTTCACCTTCTTCTGCAG	8690	jerky homolog-like (mouse) [Source:HGNC Symbol;Acc:6200]	4.53647	5.90584
ASHGA5P001165	0.00263311	0.0189834	2.5757	down	protein_coding	NM_003830	CCDS33088.1	SIGLEC5	RefSeq	2523	chr19	-	52114755	52133727	CTGTCCAGCTCAATGTCTCCTATGCTCCACAGACCATCACCATCTTCAGGAACGGCATAG	8778	sialic acid-binding Ig-like lectin 5 precursor	4.92183	6.28679
ASHGA5P011131	0.000235493	0.00483497	2.5756	down	protein_coding	NM_005725	CCDS881.1	TSPAN2	RefSeq	3213	chr1	-	115590632	115632121	GCTTGGATCATTTTTTACCTGCCTCCTGGTGATATTTGCTGCTGAAGTAACCACTGGAGT	10100	tetraspanin-2	3.96334	5.32825
ASHGA5P004708	0.00106192	0.0112784	2.57202	down	protein_coding	ENST00000296422	CCDS34041.1	SLC9B1	GENCODE	1879	chr4	-	103822084	103940896	TTCTATTAGGTTTTGTTCTAGGTGCTGTCTCTCCTGCTGTTGTTGTCCCTTACATGATGG	150159	"solute carrier family 9, subfamily B (NHA1, cation proton antiporter 1), member 1 [Source:HGNC Symbol;Acc:24244]"	4.94885	6.31175
ASHGA5P012749	0.00828484	0.0365458	2.57013	down	protein_coding	NM_002836	CCDS13038.1	PTPRA	RefSeq	3637	chr20	+	2844840	3019315	CAGCAACCACTCCAGAAACTTTCCCTCCTTCAGGTAATTCTGACTCGAAGGACAGAAGAG	5786	receptor-type tyrosine-protein phosphatase alpha isoform 1 precursor	5.92955	7.29139
ASHGA5P006947	0.000481425	0.00748745	2.5678	down	protein_coding	NM_032385	CCDS43390.1	C5orf4	RefSeq	2997	chr5	-	154198051	154230213	TACCACCATCTCAAGTTCAACCAGTGCTATGGGGTGCTGGGTGTGCTGGACCACCTCCAT	10826	uncharacterized protein C5orf4	3.00911	4.36964
ASHGA5P053046	0.0279208	0.0764183	2.56598	down	protein_coding	NM_001077477	CCDS53408.1	NR1I3	RefSeq	1093	chr1	-	161199455	161208000	GTTCCAGGTAGAGTTTTTGGAGTTGCTCTTTCACTTCCATGGAACACTACGAAAACTGCA	9970	nuclear receptor subfamily 1 group I member 3 isoform 14	4.70085	6.06036
ASHGA5P003153	0.0110514	0.0438398	2.56329	down	protein_coding	NM_198329	CCDS3077.1	UBA5	RefSeq	2866	chr3	+	132373289	132396944	CTACCCACCACCAGCCGCTTGATGGCATTGAAACGAATGGGAATTGTAAGCGACTATGAG	79876	ubiquitin-like modifier-activating enzyme 5 isoform 2	5.23698	6.59497
ASHGA5P006388	0.000951886	0.0106325	2.55797	down	protein_coding	NM_004259	CCDS42380.1	RECQL5	RefSeq	3732	chr17	-	73622924	73663269	TTCTGTGAAGAACTGGGGTGCCGCCATGCCGCCATTGCCAAGTACTTCGGGGATGCGCTG	9400	ATP-dependent DNA helicase Q5 isoform 1	6.12407	7.47907
ASHGA5P037983	0.0273407	0.0755468	2.55712	down	protein_coding	NM_033386	CCDS13961.1	MICALL1	RefSeq	4495	chr22	+	38302154	38338465	ATCACGCTGGTGCAGGCAGAACCAAAGAAGAAGCCAGCCCCACTTCCCCCAAGCAGCAGC	85377	MICAL-like protein 1	8.09919	9.45371
ASHGA5P034190	0.00142906	0.0134298	2.55675	down	protein_coding	NM_006149	CCDS12521.1	LGALS4	RefSeq	1291	chr19	-	39292310	39303740	AGGGCTCACAGCTCGAAGAACCATCATCATCAAGGGCTATGTGCCTCCCACAGGCAAGAG	3960	galectin-4	3.51581	4.87012
ASHGA5P039905	0.00526119	0.0283876	2.55441	down	protein_coding	ENST00000313860	CCDS33977.1	LIMCH1	GENCODE	6165	chr4	+	41362803	41702061	CTTCCAGGCTGGGCCTTTCTCTCCCTGTTCTCCCACCCCTCCCGGTCAGTCACCAAACAG	22998	LIM and calponin homology domains 1 [Source:HGNC Symbol;Acc:29191]	10.3778	11.7308
ASHGA5P006955	0.00996535	0.0409392	2.54925	down	protein_coding	ENST00000326233	CCDS1025.1	LCE1D	GENCODE	430	chr1	+	152769226	152770657	TGTGACTCCGCTCCTGAACACCCACCACCGAGATGTCCTGCCAGCAGAGCCAGCAGCAGT	353134	late cornified envelope 1D [Source:HGNC Symbol;Acc:29465]	8.39963	9.7497
ASHGA5P042453	0.000676571	0.00898378	2.54671	down	protein_coding	NM_004348	CCDS4913.1	RUNX2	RefSeq	5720	chr6	+	45389913	45518819	TCCTCCCCCTCCCCCGGCCACTTCGCTAACTTGTGGCTGTTGTGATGCGTATTCCCGTAG	860	runt-related transcription factor 2 isoform c	13.1141	14.4628
ASHGA5P055456	0.000283442	0.00532734	2.54607	down	protein_coding	NM_006741	CCDS44912.1	PPP1R1A	RefSeq	1849	chr12	-	54973023	54982443	CCCGCCGCAGCGCGGGCCCACCGGCCGCCGCCCCAGCCATGGAGCAAGACAACAGCCCCC	5502	protein phosphatase 1 regulatory subunit 1A	7.39329	8.74156
ASHGA5P038754	3.99209e-06	0.000441313	2.54311	down	protein_coding	NM_005201	CCDS2684.1	CCR8	RefSeq	1487	chr3	+	39371196	39375171	TTTTATTGCCTCCTGTTTGTATTCAGTCTTCTGGGAAACAGCCTGGTCATCCTGGTCCTT	1237	C-C chemokine receptor type 8	2.80844	4.15504
ASHGA5P050626	0.0426299	0.0965671	2.54235	down	protein_coding	NM_003466	CCDS46398.1	PAX8	RefSeq	4065	chr2	-	113973573	114036498	AGTTCTAGCTCCACCCCTTCCTCTTTATCTAGCTCCGCCTTTTTGGATCTGCAGCAAGTC	7849	paired box protein Pax-8 isoform PAX8A	9.91014	11.2563
ASHGA5P010898	0.0228484	0.0683572	2.5404	down	protein_coding	NM_002857	CCDS1201.1	PEX19	RefSeq	3722	chr1	-	160246598	160254941	AGAGCTGGCTGGAGAGATGCCTCCTGGCCTCAACTTTGACCTGGATGCCCTCAATCTTTC	5824	peroxisomal biogenesis factor 19 isoform a	4.28467	5.62973
ASHGA5P001748	0.00863631	0.0375538	2.53957	down	protein_coding	NM_013278	CCDS42217.1	IL17C	RefSeq	1048	chr16	+	88705000	88706882	CACCATGACGCTCCTCCCCGGCCTCCTGTTTCTGACCTGGCTGCACACATGCCTGGCCCA	27189	interleukin-17C precursor	8.39977	9.74436
ASHGA5P051740	0.0261782	0.0737953	2.53779	down	protein_coding	NM_024996	CCDS33885.1	GFM1	RefSeq	3468	chr3	+	158362316	158410360	TGAACCCACCCGGCGCCACGGGACTTTGACGCGTGCTCTGCGCTTGCCATGAGACTCCTG	85476	"elongation factor G, mitochondrial"	6.16752	7.5111
ASHGA5P004295	0.00125055	0.0125018	2.53076	down	protein_coding	NM_017546	CCDS2050.1	C2orf29	RefSeq	2544	chr2	+	101869344	101886778	ATATATGCAGAATCGGTTGGTGCGTCTTGTGTGTGTGTTTCTCCAATCCTTGATCCGTAA	55571	UPF0760 protein C2orf29	5.4178	6.75737
ASHGA5P054728	0.000705796	0.00913589	2.5236	down	protein_coding	ENST00000422024	CCDS47750.2	ASB10	GENCODE	1934	chr7	-	150872784	150884478	CCTCTCCTCCTCCCCACTCCCCTTTCCCTGCCCACATGCTCATGAGTTGGTCTCCAGAAG	136371	ankyrin repeat and SOCS box containing 10 [Source:HGNC Symbol;Acc:17185]	12.692	14.0275
ASHGA5P006221	0.001562	0.0141879	2.52186	down	protein_coding	NM_003652	CCDS3404.1	CPZ	RefSeq	2259	chr4	+	8594386	8621488	AACCCCGCCGCCACCTGCGTGGACCTGCAGCTCAGGACCTGCAGTGATGCCGCCTACAAC	8532	carboxypeptidase Z isoform 2 precursor	7.96558	9.30006
ASHGA5P011793	0.00626101	0.031049	2.52174	down	protein_coding	ENST00000392017	CCDS2503.2	ATG16L1	GENCODE	3405	chr2	+	234160216	234204320	ATATCTTTGGGAGACGCTCTGTCTCTTCCTTCCCAGTCCCCCAGGACAATGTGGATACTC	55054	autophagy related 16-like 1 (S. cerevisiae) [Source:HGNC Symbol;Acc:21498]	5.98579	7.32021
ASHGA5P012583	0.000595708	0.00850546	2.51923	down	protein_coding	NM_148902	CCDS30552.1	TNFRSF18	RefSeq	1193	chr1	-	1138887	1142089	CAGCTGAGGAAGACCCAGCTGCTGCTGGAGGTGCCGCCGTCGACCGAAGACGCCAGAAGC	8784	tumor necrosis factor receptor superfamily member 18 isoform 3 precursor	3.09084	4.42382
ASHGA5P008709	0.0117737	0.0455487	2.51862	down	protein_coding	NM_004532	CCDS3310.1	MUC4	RefSeq	4111	chr3	-	195473637	195538844	TGTCTCTGCCTCCTTCCGCATGTGGTCCCAGGAATGACAACACCGTCACTGAAGACAGAC	4585	mucin-4 isoform d precursor	5.74237	7.07501
ASHGA5P001860	0.00309407	0.0208631	2.51652	down	protein_coding	NM_005982	CCDS9748.1	SIX1	RefSeq	2687	chr14	-	61111416	61116155	CCAAGGAAAGGGAGAACACCGAAAACAATAACTCCTCCTCCAACAAGCAGAACCAACTCT	6495	homeobox protein SIX1	4.56647	5.8979
ASHGA5P013660	0.00255777	0.0187135	2.51527	down	protein_coding	NM_152904	CCDS42280.1	SPECC1	RefSeq	4992	chr17	+	19990334	20142743	CAGAGCCGCCCCTCCCTCCCTGGGCTCTGTCAGCTAGCAGAGCATTTGGTGGAAGAAAGA	92521	cytospin-B isoform 3	11.2233	12.554
ASHGA5P053336	0.00231918	0.0177082	2.51444	down	protein_coding	NM_004333	CCDS5863.1	BRAF	RefSeq	2949	chr7	-	140433812	140624564	GGCTCTCGGTTATAAGATGGCGGCGCTGAGCGGTGGCGGTGGTGGCGGCGCGGAGCCGGG	673	serine/threonine-protein kinase B-raf	3.22367	4.55391
ASHGA5P051638	0.0392602	0.092047	2.51199	down	protein_coding	NM_005213	CCDS3011.1	CSTA	RefSeq	838	chr3	+	122044010	122060815	ACACTTCCCTGTTCACTTTGGTTCCAGCATCCTGTCCAGCAAAGAAGCAATCAGCCAAAA	1475	cystatin-A	5.70368	7.03251
ASHGA5P007863	0.00100325	0.0109091	2.51046	down	protein_coding	ENST00000337679	CCDS46067.1	YIF1B	GENCODE	2854	chr19	-	38794199	38806606	CTACTACCTGGTGCTGGGCTGGTGCTGCGTAGCCATCTTTGTGTTCATGTTTCCCCTTTT	90522	Yip1 interacting factor homolog B (S. cerevisiae) [Source:HGNC Symbol;Acc:30511]	4.59357	5.92152
ASHGA5P010119	0.00073149	0.00931461	2.50654	down	protein_coding	NM_018646	CCDS5874.1	TRPV6	RefSeq	2931	chr7	-	142568959	142583490	AGCAGAAGAGGATCTGGGAGTCTCCTCTCCTTCTAGCTGCCAAAGATAATGATGTCCAGG	55503	transient receptor potential cation channel subfamily V member 6	4.00457	5.33026
ASHGA5P011325	0.0347768	0.086022	2.50584	down	protein_coding	NM_007131	CCDS14648.1	ZNF75D	RefSeq	3293	chrX	-	134419722	134429965	TATGAAAGAGCTGTGCATGATCAACAGATGTTAGCCCTTTCTGAGCAGAAAAGAATCAAA	7626	zinc finger protein 75D isoform 1	4.70337	6.02867
ASHGA5P027586	0.00114106	0.0118492	2.49954	down	protein_coding	ENST00000377617	CCDS31902.1	ATXN2	GENCODE	4702	chr12	-	111890017	112037480	GGTGGCCACCGAGTCTCGCCGCTTCGCCGCAGCCAGGTGGCCCGGGTGGCGCTCGCTCCA	6311	ataxin 2 [Source:HGNC Symbol;Acc:10555]	3.98295	5.30462
ASHGA5P048899	0.00135126	0.0129373	2.49722	down	protein_coding	NM_002005	CCDS10365.1	FES	RefSeq	2783	chr15	+	91427687	91439006	TACGTGCTGTCGGTGCTGTGGGATGGTCTGCCCCGGCACTTCATCATCCAGTCCTTGGAT	2242	tyrosine-protein kinase Fes/Fps isoform 1	6.237	7.55733
ASHGA5P049888	0.00484502	0.0271337	2.49459	down	protein_coding	NM_144679	CCDS11779.1	ENTHD2	RefSeq	2308	chr17	-	79202076	79212891	CGGAAGCGGGGCAGACCGGGAGGGGACCTGGATCATGGCTGCCGCGCCGCCGCTACGGGA	146705	AP-4 complex accessory subunit tepsin	3.44637	4.76518
ASHGA5P001391	0.000403264	0.00667332	2.49149	down	protein_coding	NM_002119	CCDS4763.1	HLA-DOA	RefSeq	3485	chr6	-	32971959	32977389	AGGCATTGGGAGCTCCAGGTGCCTATTCCACCACCAGATGCCATGGAGACCCTGGTCTGT	3111	"HLA class II histocompatibility antigen, DO alpha chain precursor"	3.76213	5.07913
ASHGA5P034371	0.017929	0.0589133	2.49119	down	protein_coding	ENST00000215582	CCDS12042.1	C19orf21	GENCODE	2851	chr19	+	751145	764318	TTCAGCCCCATCCACCTACACTCAAACGTGGCGTGGACAGTGGAAGATCCAGTGGACAGT	126353	chromosome 19 open reading frame 21 [Source:HGNC Symbol;Acc:27000]	5.09372	6.41056
ASHGA5P055180	0.0327907	0.0835307	2.48687	down	protein_coding	NM_001164277		SLC37A4	RefSeq	2621	chr11	-	118895060	118901616	GTCTTGGCTGGTAGGGCCTGCTCTTTTCTACCATGGCAGCCCAGGGCTATGGCTATTATC	2542	glucose-6-phosphate translocase isoform 1	5.05928	6.37361
ASHGA5P021830	0.010674	0.0427925	2.48655	down	protein_coding	ENST00000545060	CCDS54099.1	SLC13A2	GENCODE	2226	chr17	+	26800663	26824796	TCGTCCCCAGTAAGGTTGCCGTCGAGTATCTTAAGGACTCCAACCTCCTGTTCTTCGGGG	9058	"solute carrier family 13 (sodium-dependent dicarboxylate transporter), member 2 [Source:HGNC Symbol;Acc:10917]"	4.91821	6.23236
ASHGA5P050794	0.0287191	0.0774792	2.48507	down	protein_coding	NM_212476	CCDS42813.1	FN1	RefSeq	8272	chr2	-	216225178	216300791	TGCCTCTACAGGACAAGAAGCTCTCTCTCAGACAACCATCTCATGGGCCCCATTCCAGGA	2335	fibronectin isoform 5 preproprotein	4.72347	6.03676
ASHGA5P010997	0.0402679	0.0934416	2.48468	down	protein_coding	NM_005978	CCDS1044.1	S100A2	RefSeq	970	chr1	-	153533584	153538306	TTCCTGGGTCTGTCTCTGCCACCTGGTCTGCCACAGATCCATGATGTGCAGTTCTCTGGA	6273	protein S100-A2	6.04443	7.35749
ASHGA5P003370	0.00252131	0.0185315	2.48462	down	protein_coding	ENST00000267119	CCDS8831.1	KRT71	GENCODE	2265	chr12	-	52937692	52946931	AATTTCCCTCCCCTGTCAGCATCTCCATCATCAGCAGCACCAGTGGCGGCAGTGTCTATG	112802	keratin 71 [Source:HGNC Symbol;Acc:28927]	9.84698	11.16
ASHGA5P032122	0.000642758	0.00880855	2.48461	down	protein_coding	NM_002479	CCDS1433.1	MYOG	RefSeq	1744	chr1	-	203052256	203055166	TTCTATGATGGGGAAAACTACCTGCCTGTCCACCTCCAGGGCTTCGAACCACCAGGCTAC	4656	myogenin	5.24772	6.56073
ASHGA5P013542	0.000331501	0.00591418	2.48279	down	protein_coding	NM_018915	CCDS47289.1	PCDHGA2	RefSeq	4790	chr5	+	140718353	140892546	AAGAGAAGAAACGTTTTCTCAGCAAGCCCCGCCCAACACGGACTGGCGTTTCTCTCAGGC	56113	protocadherin gamma-A2 isoform 1 precursor	6.55615	7.86811
ASHGA5P008045	0.00157781	0.0142619	2.48082	down	protein_coding	NM_001135179	CCDS46811.1	ZDHHC3	RefSeq	12630	chr3	-	44956752	45017674	GATTGGACAAAGTGCAGCTCCTTCTCTCCACCCACCACAGTGATTCTCCTTATCCTGCTG	51304	palmitoyltransferase ZDHHC3 isoform 1	6.31971	7.63052
ASHGA5P007324	0.000376137	0.00640753	2.47826	down	protein_coding	ENST00000331427	CCDS11708.1	OTOP2	GENCODE	2147	chr17	+	72920369	72930006	AAGACATTTCTCTGTTTCTCCTACTCTGCAATGTCATTCTGTGGATCATGCCTGCCTTCG	92736	otopetrin 2 [Source:HGNC Symbol;Acc:19657]	3.46004	4.76937
ASHGA5P048520	0.0239723	0.0704168	2.47474	down	protein_coding	NM_001005467	CCDS31709.1	OR8B3	RefSeq	942	chr11	-	124266305	124267247	GGGTGCATGACTCAGCTGTTTTTCTTTCTCTTTTTTGTCATCTCTGAATGTTACATGTTG	390271	olfactory receptor 8B3	3.56053	4.8678
ASHGA5P011524	0.00565717	0.0293881	2.47251	down	protein_coding	NM_153710	CCDS35169.1	C9orf96	RefSeq	2779	chr9	+	136243283	136271220	ATGGTCTACAGCCTGCTAGCCATCACCACAACCCAGGAGTCAGAGTCACTGTCAGAGGAG	169436	protein kinase-like protein SgK071	4.19494	5.50092
ASHGA5P005613	0.0020814	0.016643	2.47241	down	protein_coding	NM_002149	CCDS1671.1	HPCAL1	RefSeq	1779	chr2	+	10443029	10567743	CTGGTCTCTGGTGTAGTCGCCGCCGCCAGCCGCCATGGGCAAACAGAACAGCAAGCTGCG	3241	hippocalcin-like protein 1	9.45437	10.7603
ASHGA5P052458	0.00111285	0.0116631	2.46793	down	protein_coding	NM_024028	CCDS4296.1	PCYOX1L	RefSeq	2561	chr5	+	148737569	148749221	GCTAGCGCCTGAATCCGGCGTGCTGCCCGCTCGCCGCCCGCCATGGCCCGCGCAGCCCCG	78991	prenylcysteine oxidase-like precursor	6.58548	7.88878
ASHGA5P054450	0.00300575	0.02055	2.46786	down	protein_coding	NM_001040084	CCDS31194.1	ANXA8	RefSeq	2070	chr10	+	48255224	48271368	AGGCAGAGCCCGGGGGCGAGGGGACGGCAGGCAGGTGTGGCGCTGCCCTGGGCGGGCTTG	653145	annexin A8	3.96073	5.26398
ASHGA5P011450	0.00796274	0.035593	2.46683	down	protein_coding	NM_002979	CCDS572.1	SCP2	RefSeq	2725	chr1	+	53392900	53517289	ATTCAGGGTGGTGTGGCAGAATGTGTCTTGGCTCTTGGGTTTGAGAAGATGAGTAAGGGA	6342	non-specific lipid-transfer protein isoform 1 proprotein	3.59538	4.89803
ASHGA5P031090	0.00146154	0.013597	2.46474	down	protein_coding	NM_001256932		LOC730183	RefSeq	587	chr16	-	30709024	30709810	TCCCAGCGAACCGCCGCTGCCGCTCCCGAGGCCTCACCAAAATGGCCGCCGCCGTCTCGG	730183	uncharacterized protein LOC730183	9.07024	10.3717
ASHGA5P047673	0.000177604	0.00406672	2.46382	down	protein_coding	NM_001143909		LOC729020	RefSeq	2130	chr10	+	105005643	105007773	AAAGTGGGCTCTAGTCTTGCCGGGGACTCGTGGGGTAACTTGTTCTTGGGAGCCAGCGGT	729020	rcRPE protein	3.44644	4.74734
ASHGA5P013318	0.000120519	0.00313503	2.46356	down	protein_coding	NM_144671	CCDS9152.1	FAM109A	RefSeq	3168	chr12	-	111798454	111806925	GGCCTGAGAGGCCCCAGGCTCCCCTCCAGGCCCCGCGATTGCCACCATGAAGCTGAACGA	144717	sesquipedalian-1 isoform 2	6.83582	8.13656
ASHGA5P049180	0.00830028	0.0365722	2.46347	down	protein_coding	NM_002773	CCDS45469.1	PRSS8	RefSeq	1940	chr16	-	31142753	31147151	TTTGTCCAAGAGGACATGGTGTGTGCTGGCTATGTGGAGGGGGGCAAGGACGCCTGCCAG	5652	prostasin preproprotein	5.05011	6.3508
ASHGA5P000993	0.00499972	0.0276505	2.46124	down	protein_coding	NM_199360	CCDS13542.1	TPD52L2	RefSeq	2428	chr20	+	62496580	62522898	ATTTTCACACTCCTTTAGCAGCTACTCCATCCGCCACTCAATAAGTATGCCAGCCATGAG	7165	tumor protein D54 isoform a	5.59537	6.89475
ASHGA5P005595	0.00022771	0.00471479	2.45785	down	protein_coding	NM_007286	CCDS4308.1	SYNPO	RefSeq	5397	chr5	+	150020206	150038792	CGAGGCTCAGGACCGCCGGGAGAGCCTGCCCACCTCCCCACCCTGGACGCCGGGCGCGTC	11346	synaptopodin isoform A	9.20228	10.4997
ASHGA5P012822	0.000196617	0.00429816	2.45701	down	protein_coding	NM_001190737	CCDS55291.1	NFIB	RefSeq	8507	chr9	-	14081841	14314045	ATATGTGGGACTAAGCCCAAGAGACCCATCCTTCCTACATCAGCAACAGTCCTGGTACCT	4781	nuclear factor 1 B-type isoform 1	3.88476	5.18166
ASHGA5P003016	0.000483119	0.00750233	2.45631	down	protein_coding	NM_020533	CCDS12180.1	MCOLN1	RefSeq	2118	chr19	+	7587495	7598895	AATTCCACAAGCTGGTCAATGTCACCATCCACTTCCGGCTGAAGACCATTAACCTCCAGA	57192	mucolipin-1	3.33902	4.63551
ASHGA5P010276	0.000301078	0.00552223	2.45478	down	protein_coding	NM_144569	CCDS347.1	SPOCD1	RefSeq	3888	chr1	-	32256024	32281580	GGGGGCCCAGGCCTTTGGGCTCTTCCTGTCTCCCCTCTCCTTTCCCCAGGTCTGGAGGTC	90853	SPOC domain-containing protein 1	8.81177	10.1074
ASHGA5P054908	0.000183936	0.00411359	2.45415	down	protein_coding	NM_002696	CCDS31585.1	POLR2G	RefSeq	852	chr11	+	62529010	62534187	AGGGACTGTCGGAGGTGTGGACTCTGCCTGCCTACCTGGTCTGGGAAGATGTTCTACCAT	5436	DNA-directed RNA polymerase II subunit RPB7	8.7829	10.0781
ASHGA5P010722	0.0195511	0.061853	2.45355	down	protein_coding	NM_014161	CCDS5270.1	MRPL18	RefSeq	994	chr6	+	160211491	160219461	TTCGGTCGCGGTTTTGGGGGTTGTTCTCGGTTTGCAGGAACCCTGGGTGCAGGTTCGCAG	29074	"39S ribosomal protein L18, mitochondrial"	3.62362	4.91849
ASHGA5P007420	0.0169073	0.0568767	2.45333	down	protein_coding	NM_001135054	CCDS31325.1	SIGIRR	RefSeq	1761	chr11	-	405715	414999	CGGCTCCGTGACTCCTTCCTCCGATTTTTGGAAAGAAGTGCAGCTGGCGCTGCCGCGGAA	59307	single Ig IL-1-related receptor	5.5452	6.83994
ASHGA5P053303	0.00071149	0.00916991	2.45082	down	protein_coding	NM_022143	CCDS5799.1	LRRC4	RefSeq	3723	chr7	-	127667123	127671002	TCAAATATGACTCCCCTCCCCCAAAAAACTTATAAAATGCAATAGAATGCACACAAAGAC	64101	leucine-rich repeat-containing protein 4 precursor	11.5816	12.8749
ASHGA5P013665	0.00228722	0.0175967	2.44567	down	protein_coding	NM_001130921	CCDS33683.1	RABL2B	RefSeq	2438	chr22	-	51205919	51222087	TTGGCTTTCTGTCGCTCTCTCTACAGGGTACAGACAGTGACAATACCCTCCCCTCCCTTG	11158	rab-like protein 2B isoform 1	9.98424	11.2745
ASHGA5P009946	0.00272517	0.0193422	2.44269	down	protein_coding	NM_024816	CCDS42140.1	RABEP2	RefSeq	2280	chr16	-	28915741	28936532	CCAGGGCCAGCCTGGAGGGGCAGCTGAGGGTGCAGCGGGAGGAGACAGAGGTGCTGGAGG	79874	rab GTPase-binding effector protein 2	3.25028	4.53875
ASHGA5P009421	0.00258508	0.0188356	2.43933	down	protein_coding	NM_018896	CCDS45730.1	CACNA1G	RefSeq	8264	chr17	+	48638428	48704832	TGACATGCACACACTCTTACTTAGTGCCCTGGAGAGCAATATGCAGCCCCACCCCACGGA	8913	voltage-dependent T-type calcium channel subunit alpha-1G isoform 1	7.20954	8.49602
ASHGA5P003288	0.00993492	0.0408697	2.43901	down	protein_coding	NM_018712	CCDS44723.1	ELMOD1	RefSeq	3006	chr11	+	107461816	107537505	GCAGGTCCTGTCTGACTCTCTTCATCCGAAATGCAGGGATATCACTAAAGAAGAAATAAG	55531	ELMO domain-containing protein 1 isoform 1	3.87504	5.16134
ASHGA5P013695	0.00133819	0.0129175	2.43567	down	protein_coding	NM_001164104	CCDS54541.1	MOV10L1	RefSeq	3828	chr22	+	50528434	50600116	CATTTCGACCGACCCCTGTTTTGGTGCTTTGCTGGAATACAGTATTACAAACGGTGTTTA	54456	putative helicase Mov10l1 isoform 2	4.73509	6.01941
ASHGA5P008971	0.0185749	0.0600872	2.43468	down	protein_coding	NM_001168344	CCDS34336.1	RREB1	RefSeq	8532	chr6	+	7107829	7252213	TACAGAGGCACATGCTCACACACACTGACAGTCAGTCGGATGCGGAGACTGCAGCCGCCG	6239	ras-responsive element-binding protein 1 isoform 2	4.01015	5.29388
ASHGA5P001959	0.0298744	0.0791526	2.43374	down	protein_coding	ENST00000319590	CCDS12821.1	KLK12	GENCODE	1074	chr19	-	51532347	51538148	CACCCACGGAACCCATTCCCGGATCTGCTCCAGTGCCTCAACCTCTCCATCGTCTCCCAT	43849	kallikrein-related peptidase 12 [Source:HGNC Symbol;Acc:6360]	7.64751	8.93068
ASHGA5P051552	0.0017952	0.0153415	2.43127	down	protein_coding	NM_014041	CCDS33769.2	SPCS1	RefSeq	1100	chr3	+	52739856	52742197	CGGGGCCGCCGCCATCGCTCTCCCGGGCTTAGAAGGCCCGGCTACTGACGCGCAGTGCCA	28972	signal peptidase complex subunit 1	6.93523	8.21694
ASHGA5P013758	0.00491146	0.0273554	2.4291	down	protein_coding	NM_017668	CCDS10564.1	NDE1	RefSeq	3222	chr16	+	15744082	15820208	CGCCGCCCCTGCTCGGACACCATGCCACAAGGAGAGTGATCTCTTCCCCTGTTTTCACAA	54820	nuclear distribution protein nudE homolog 1	9.4457	10.7261
ASHGA5P052907	2.06945e-05	0.00116472	2.4252	down	protein_coding	NM_003564	CCDS1189.1	TAGLN2	RefSeq	1360	chr1	-	159887902	159895284	AGATCCTCTGATCCCACCCCAGGCCTTGCCCCTGCCCTCCCACGAATGGTTAATATATAT	8407	transgelin-2	11.8061	13.0842
ASHGA5P050706	0.00219852	0.0171068	2.4251	down	protein_coding	NM_007023	CCDS42775.1	RAPGEF4	RefSeq	4361	chr2	+	173600524	173917620	CAGGGACACCGCGCGCCGCCGCTCAACATGGTCGCTGCGCACGCTGCCCATTCTTCCTCC	11069	rap guanine nucleotide exchange factor 4 isoform a	6.45182	7.72987
ASHGA5P002171	0.0234173	0.0693666	2.4228	down	protein_coding	NM_005568	CCDS11316.1	LHX1	RefSeq	3431	chr17	+	35294771	35301915	AGCTCATCCCCAATGGTCCCTTCTCCTTCTACGGAGATTACCAGAGCGAGTACTACGGGC	3975	LIM/homeobox protein Lhx1	6.04932	7.326
ASHGA5P037080	0.00172883	0.0149488	2.42274	down	protein_coding	ENST00000372622	CCDS13369.1	DNTTIP1	GENCODE	1290	chr20	+	44420575	44440066	CGGCCGGTGACAGAGTCCAGCGGAGTTGTGGGGGCCGGGGGCGCCATGGGAGCCACTGGC	116092	"deoxynucleotidyltransferase, terminal, interacting protein 1 [Source:HGNC Symbol;Acc:16160]"	4.27458	5.55122
ASHGA5P028955	0.000447832	0.00713938	2.42211	down	protein_coding	NM_007111	CCDS9538.1	TFDP1	RefSeq	2651	chr13	+	114239055	114295788	CTTCATCATCGTCAACACCAGCAAGAAGACGGTCATCGACTGCAGCATCTCCAATGACAA	7027	transcription factor Dp-1	3.7585	5.03477
ASHGA5P007341	0.0181572	0.0593881	2.41844	down	protein_coding	NM_001010898	CCDS30799.1	SLC6A17	RefSeq	6422	chr1	+	110693131	110744823	ATCGGCTTCTCCAGCTGCATAGTCTGTCTCTTTGTGGGGCTGTATTATAATGTGATCATC	388662	sodium-dependent neutral amino acid transporter SLC6A17	4.46465	5.73873
ASHGA5P038653	0.00024871	0.00499744	2.41698	down	protein_coding	ENST00000412723	CCDS3324.1	PIGZ	GENCODE	2701	chr3	-	196673213	196695704	AGTTTTACCCCAGCAGCTCCTGCCGCTCGGTGCTCTTCCCCCTGCTGATCTCTGGTTCCA	80235	"phosphatidylinositol glycan anchor biosynthesis, class Z [Source:HGNC Symbol;Acc:30596]"	7.19054	8.46374
ASHGA5P009774	0.0243318	0.0710014	2.41657	down	protein_coding	ENST00000398793	CCDS13797.1	TOP3B	GENCODE	3107	chr22	-	22311402	22337147	TACAACCACCCACCCTTCCGAGACATGAAGAAAGGCATGGGCTGCAACGAGTGTACGCAC	8940	topoisomerase (DNA) III beta [Source:HGNC Symbol;Acc:11993]	6.69758	7.97054
ASHGA5P055757	0.00391642	0.0239763	2.41177	down	protein_coding	NM_005830	CCDS9372.1	MRPS31	RefSeq	1344	chr13	-	41303431	41345347	GGACGCACCATTTCAGTTGTGTTCTTGGTTCATTTCGTGTCTCGGCGATGTTTCCTAGAG	10240	"28S ribosomal protein S31, mitochondrial"	3.15775	4.42784
ASHGA5P013864	0.00059966	0.00850701	2.41071	down	protein_coding	NM_172314	CCDS45086.1	IL25	RefSeq	1187	chr14	+	23842017	23845612	CATGTACCAGGTGGTTGCATTCTTGGCAATGGTCATGGGAACCCACACCTACAGCCACTG	64806	interleukin-25 isoform 2 precursor	3.15432	4.42378
ASHGA5P049860	0.0446331	0.0989504	2.41013	down	protein_coding	NM_198955	CCDS45788.1	MGAT5B	RefSeq	4068	chr17	+	74868728	74946471	GTCTGGAGCTCAGCCCCCATCCTTTCATTCTCCCTTGCTTCCTTCACTCATGCACTCATT	146664	"alpha-1,6-mannosylglycoprotein 6-beta-N-acetylglucosaminyltransferase B isoform 2"	8.57062	9.83973
ASHGA5P052694	0.000443369	0.00707932	2.40694	down	protein_coding	NM_006772	CCDS34434.2	SYNGAP1	RefSeq	6011	chr6	+	33387846	33421466	GCCCCCTCCCCCCAGGCCTGATGAGCAGGTCTCGAGCCTCCATCCATCGGGGGAGCATCC	8831	ras GTPase-activating protein SynGAP	13.1518	14.419
ASHGA5P014438	0.000493714	0.00758592	2.40551	down	protein_coding	NM_207387	CCDS11178.2	FAM211A	RefSeq	2715	chr17	-	16345318	16395505	TCCCAAGCCGCCTCAAGGCTGTCCTGGCCGGAAGCCCCCCAGACAACACAGTGGACCTGT	388341	leucine-rich repeat-containing protein FAM211A isoform 2	8.7024	9.96874
ASHGA5P009579	0.000928675	0.0104989	2.40316	down	protein_coding	NM_207194	CCDS1085.1	ADAM15	RefSeq	2927	chr1	+	155023747	155035252	GAGACTCCAGTCTCAGGGGCCAGCCAAGCCCCCACCCCCAAGGAAGCCACTGCCTGCCGA	8751	disintegrin and metalloproteinase domain-containing protein 15 isoform 3 preproprotein	9.68964	10.9546
ASHGA5P049478	0.00634135	0.0313741	2.40281	down	protein_coding	NM_001080424	CCDS32552.1	KDM6B	RefSeq	6704	chr17	+	7743234	7758118	CTCCCCCCAGGCCCCAGCCAGCACGTCGCGATGAGGCCGGACGCCCCGCCCGCCTGCCTG	23135	lysine-specific demethylase 6B	9.39341	10.6581
ASHGA5P004433	7.39273e-05	0.00239078	2.40023	down	protein_coding	NM_198406	CCDS1136.1	PAQR6	RefSeq	1882	chr1	-	156213208	156217792	CAAGCTCTGGGTCAACGTGGAGGTACCAGGCCACCATGCTCAGTCTCAAGCTGCCCCAAC	79957	progestin and adipoQ receptor family member 6 isoform 2	3.22846	4.49163
ASHGA5P002410	0.034782	0.086022	2.39994	down	protein_coding	NM_032639	CCDS5424.1	PLEKHA8	RefSeq	2315	chr7	+	30067976	30130359	ACAGCCCTAAGAAATCCAACAGAAAACACTTGACACCAAAACATACCCTGATGAAGATCC	84725	pleckstrin homology domain-containing family A member 8 isoform 3	3.31536	4.57836
ASHGA5P045749	0.016864	0.0568475	2.39845	down	protein_coding	NM_001098805	CCDS43828.1	ANKRD20A4	RefSeq	3517	chr9	+	69381980	69425109	CCCAGATGAATTGAAGTGTATTGCTGTGTCTTGTAATACCTTGCTTTAACTAGCTTTTTA	728747	ankyrin repeat domain-containing protein 20A4	3.39725	4.65935
ASHGA5P034408	0.0254357	0.0726215	2.39499	down	protein_coding	NM_001242901		LOC100131094	RefSeq	3071	chr19	+	4679293	4685960	ACAGATGGGGGCAGAGAGAGAGAGAGAAACAGGCGTCGGGTCCTACAGCCAGCATCAGCC	100131094	uncharacterized protein LOC100131094	6.37231	7.63233
ASHGA5P046543	0.0116735	0.0452726	2.39226	down	protein_coding	NM_175698	CCDS14344.1	SSX2	RefSeq	1322	chrX	+	52780307	52790617	TCTGAGTGTTTAATTTCAGATTTTTTCCTCTGCATTTACACACACACGCACACAAACCAC	6757	protein SSX2 isoform b	5.08605	6.34443
ASHGA5P011757	0.00430324	0.0254863	2.39218	down	protein_coding	NM_001032221	CCDS35146.1	STXBP1	RefSeq	3850	chr9	+	130374485	130454995	GTGCTGATAGGATCCACACACATCCTCACCCCACAGAAACTGCTGGACACACTGAAGAAA	6812	syntaxin-binding protein 1 isoform b	5.68735	6.94568
ASHGA5P050427	0.0119182	0.0459887	2.39156	down	protein_coding	NM_172195	CCDS46245.1	EIF2B4	RefSeq	1719	chr2	-	27587218	27592919	TCTCTCTGGCTCACTTTGTGCCCTGTTTTCTGATGCAGACTCGGGATCCGGGATGAAGGC	8890	translation initiation factor eIF-2B subunit delta isoform 1	3.83395	5.0919
ASHGA5P012908	0.0104661	0.0422417	2.38616	down	protein_coding	NM_006065	CCDS13019.1	SIRPB1	RefSeq	2469	chr20	-	1545028	1600689	TATCACCCATGAAGCAGCGCTGGCTCCTACTGCTCCACTCCTCGTAGCTCTCCTCCTGGG	10326	signal-regulatory protein beta-1 isoform 1 precursor	6.64086	7.89555
ASHGA5P043900	0.0158213	0.0544868	2.38586	down	protein_coding	NM_005631	CCDS5811.1	SMO	RefSeq	3772	chr7	+	128828712	128853385	TACGTCAATGCGTGCTTCTTTGTGGGCAGCATTGGCTGGCTGGCCCAGTTCATGGATGGT	6608	smoothened homolog precursor	3.44377	4.69828
ASHGA5P004661	0.00142423	0.0134143	2.3846	down	protein_coding	NM_016625	CCDS3181.1	RSRC1	RefSeq	1647	chr3	+	157827891	158262576	GAGCCCAAAGAAATGGGACGTCGGTCATCAGATACTGAAGAAGAAAGCAGAAGCAAGAGA	51319	serine/Arginine-related protein 53	2.98042	4.23417
ASHGA5P015754	0.015782	0.0544505	2.38414	down	protein_coding	NM_001037340	CCDS30742.1	PDE4B	RefSeq	4273	chr1	+	66458389	66840262	CTCATACATGCTTTGATGTGGAAAATGGCCCTTCCCCAGGTCGGAGTCCACTGGATCCCC	5142	"cAMP-specific 3',5'-cyclic phosphodiesterase 4B isoform 3"	6.1778	7.43127
ASHGA5P018860	0.000746877	0.00939996	2.38338	down	protein_coding	NM_001097641	CCDS12153.1	FUT3	RefSeq	2066	chr19	-	5842898	5851485	GCCTCTCCAGATACTCTGACCCATGGATCCCCTGGGTGCAGCCAAGCCACAATGGCCATG	2525	galactoside 3(4)-L-fucosyltransferase	6.94416	8.19717
ASHGA5P049467	0.0251196	0.0722455	2.38255	down	protein_coding	NM_004422	CCDS11091.1	DVL2	RefSeq	3046	chr17	-	7128660	7137863	GGCCCTCCTCCATCCAGAGGCTCAACTGGGGGTGCCCCTAATCTCCGAGCCCACCCAGGG	1856	segment polarity protein dishevelled homolog DVL-2	7.68888	8.94139
ASHGA5P004622	0.00990191	0.04082	2.37864	down	protein_coding	NM_001553	CCDS3512.1	IGFBP7	RefSeq	1137	chr4	-	57897236	57976551	GTGAAAAAAGGTGAAGGTGCCGAGCTATAAACCTCCAGAATATTATTAGTCTGCATGGTT	3490	insulin-like growth factor-binding protein 7 isoform 1 precursor	6.74948	7.99962
ASHGA5P006976	0.00192642	0.0159743	2.37551	down	protein_coding	ENST00000326524	CCDS3922.1	GDNF	GENCODE	3810	chr5	-	37812778	37839782	CCGATCCGAGGTGCCGCCGCCGGACGGGACTTTAAGATGAAGTTATGGGATGTCGTGGCT	2668	glial cell derived neurotrophic factor [Source:HGNC Symbol;Acc:4232]	5.38687	6.63511
ASHGA5P051145	0.00133193	0.0129099	2.37527	down	protein_coding	NM_004571	CCDS13692.1	PKNOX1	RefSeq	4997	chr21	+	44394642	44453688	ACCATCACCACGCCCGTGAACATGAACGTGGACAGCCTTCAGTCTCTGTCCTCGGACGGG	5316	homeobox protein PKNOX1	5.58576	6.83386
ASHGA5P001891	0.000437927	0.00704042	2.37422	down	protein_coding	NM_007127	CCDS2417.1	VIL1	RefSeq	2759	chr2	+	219283837	219314248	CCCAAGACAGGCTCACTCACCATGACCAAGCTGAGCGCCCAAGTCAAAGGCTCTCTCAAC	7429	villin-1	3.37772	4.62517
ASHGA5P012323	0.00405289	0.0245462	2.37398	down	protein_coding	ENST00000377203	CCDS54132.1	CD300LG	GENCODE	1297	chr17	+	41924515	41935602	ATGAGTCTTTACTGATCTCTCTGTTCGTCTTTCCAGCTTCTCCTGGGCTCTACCCGGCAG	146894	CD300 molecule-like family member g [Source:HGNC Symbol;Acc:30455]	4.56158	5.80889
ASHGA5P005742	0.00487641	0.0272466	2.36634	down	protein_coding	NM_003377	CCDS8062.1	VEGFB	RefSeq	1822	chr11	+	64002055	64006736	AGCCAGACAGGGCTGCCACTCCCCACCACCGTCCCCAGCCCCGTTCTGTTCCGGGCTGGG	7423	vascular endothelial growth factor B isoform VEGFB-186 precursor	8.8408	10.0835
ASHGA5P052468	0.00250785	0.0184821	2.36525	down	protein_coding	NM_016221	CCDS4310.1	DCTN4	RefSeq	3937	chr5	-	150088308	150138657	ATGCGCCGGGAGCGTCATCGCCTCCTCCCTCCCCAAGATGGCGTCCTTGCTGCAGTCGGA	51164	dynactin subunit 4 isoform b	10.2918	11.5338
ASHGA5P002040	0.00227139	0.0175293	2.36209	down	protein_coding	NM_000501	CCDS5562.2	ELN	RefSeq	3480	chr7	+	73442426	73484236	CCAGCAGCTGCAGCTGCTAAAGCAGCCGCCAAAGCCGCCCAGTTTGGGTTAGTTCCTGGT	2006	elastin isoform a precursor	4.69888	5.93895
ASHGA5P010007	0.00138171	0.0131424	2.36182	down	protein_coding	NM_212471	CCDS11678.1	PRKAR1A	RefSeq	3653	chr17	+	66508109	66528910	AACAAAGGCGACCCAAGACACCCAGAGAGGGACAGAGAACCATGGAGTCTGGCAGTACCG	5573	cAMP-dependent protein kinase type I-alpha regulatory subunit	3.52839	4.76828
ASHGA5P052646	0.037308	0.089446	2.36023	down	protein_coding	NM_002701	CCDS34391.1	POU5F1	RefSeq	1411	chr6	-	31132113	31138451	CAAGCCCTCATTTCACCAGGCCCCCGGCTTGGGGCGCCTTCCTTCCCCATGGCGGGACAC	5460	"POU domain, class 5, transcription factor 1 isoform 1"	6.22337	7.4623
ASHGA5P041813	0.0143475	0.0515359	2.35912	down	protein_coding	NM_006708	CCDS4837.1	GLO1	RefSeq	2071	chr6	-	38643701	38670952	AGAAAAAGATGAAAAAATAGCCTGGGCGCTCTCCAGAAAAGCTACACTTGAGCTGACACA	2739	lactoylglutathione lyase	3.53133	4.76958
ASHGA5P050048	0.00217959	0.0170686	2.35644	down	protein_coding	ENST00000404279	CCDS45905.1	LINGO3	GENCODE	2130	chr19	-	2289773	2308156	GATGATCTGAGGGGTCCCCAGGGCGGACCCTCCCCTCCCCTCCCCCGCGGGCCGGCCGCT	645191	leucine rich repeat and Ig domain containing 3 [Source:HGNC Symbol;Acc:21206]	12.2211	13.4577
ASHGA5P047733	0.00232623	0.017711	2.3529	down	protein_coding	ENST00000425699	CCDS7607.1	NANOS1	GENCODE	4627	chr10	+	120789227	120793854	GCTTCGCCGAGCTGAGCCCGTTCGCGGGTCGTGCCGCCGCCGTGCTGCTGGGCTGCGCGC	340719	nanos homolog 1 (Drosophila) [Source:HGNC Symbol;Acc:23044]	6.38935	7.6238
ASHGA5P054482	0.00245781	0.0181885	2.3521	down	protein_coding	ENST00000299299	CCDS31217.1	PCBD1	GENCODE	1006	chr10	-	72643266	72648541	ATAGACCCTGCCCTTCCTCTTTGAATTCTTCCGGGGGAAGGGGTGACTGAACTGGGAGTC	5092	pterin-4 alpha-carbinolamine dehydratase/dimerization cofactor of hepatocyte nuclear factor 1 alpha [Source:HGNC Symbol;Acc:8646]	7.5448	8.77874
ASHGA5P016942	0.0142176	0.0513053	2.34934	down	protein_coding	ENST00000435911	CCDS45652.1	CCL14	GENCODE	554	chr17	-	34310691	34313764	AATCCTCCTCACAAACTGGGGGGAAACCGAAGGTTGTTAAAATACAGCTAAAGTTGGTGG	6358	chemokine (C-C motif) ligand 14 [Source:HGNC Symbol;Acc:10612]	4.29252	5.52477
ASHGA5P041376	0.00356638	0.0226642	2.34852	down	protein_coding	NM_003202	CCDS4169.1	TCF7	RefSeq	3277	chr5	+	133450401	133483920	CGCCGCCGGTCCCGAGCGCGACCTGGCCGAGCTCAAGTCGTCGCTCGTGAACGAGTCCGA	6932	transcription factor 7 isoform 1	3.13832	4.37007
ASHGA5P037661	0.0024338	0.0181159	2.3412	down	protein_coding	NM_032756	CCDS519.1	HPDL	RefSeq	1803	chr1	+	45792544	45794346	GTCATTATTAGCCCTTTGCTTTTCTGTATTGTTTCACTCCGTATGTAACATAACCCTAAA	84842	4-hydroxyphenylpyruvate dioxygenase-like protein	4.67054	5.89779
ASHGA5P049258	0.000617392	0.0086274	2.34088	down	protein_coding	NM_181521	CCDS42170.1	CMTM4	RefSeq	8133	chr16	-	66648652	66730610	GCCTGGACACGTGAGGACCTGCCTGGATCCTCCTCCCTCCCGTCCTCGTGCCTGTCTCTC	146223	CKLF-like MARVEL transmembrane domain-containing protein 4 isoform 2	10.0644	11.2915
ASHGA5P001684	0.01194	0.0460382	2.33957	down	protein_coding	NM_000905	CCDS5387.1	NPY	RefSeq	576	chr7	+	24323806	24331484	GCCAGCCACCATGCTAGGTAACAAGCGACTGGGGCTGTCCGGACTGACCCTCGCCCTGTC	4852	pro-neuropeptide Y preproprotein	4.39377	5.62001
ASHGA5P013611	0.0250557	0.0722313	2.3394	down	protein_coding	NM_033247	CCDS10256.1	PML	RefSeq	1797	chr15	+	74287013	74328735	CGTTGACCTGCTGCCTCCTCCAGCCCATGCTCTTACAGGCCCTGCACAGAGTAGCACTCA	5371	protein PML isoform 8	7.50422	8.73036
ASHGA5P035112	0.0108764	0.0433143	2.33876	down	protein_coding	NM_001965	CCDS1925.2	EGR4	RefSeq	2379	chr2	-	73518056	73520829	TTACTCGCTGGGCCTCTCCTTCGCTTCTCTCTGAGCAAGAGATGGGTTTATGGGTTGGGG	1961	early growth response protein 4	5.75865	6.98439
ASHGA5P050010	0.000410177	0.00675036	2.333	down	protein_coding	NM_194449	CCDS45881.2	PHLPP1	RefSeq	6411	chr18	+	60382671	60647676	CCCCACTGCAATGGAGCCCGCCGCCGCGGCCACGGTACAGCGACTCCCCGAGCTCGGCAG	23239	PH domain leucine-rich repeat-containing protein phosphatase 1	6.25439	7.47658
ASHGA5P008287	0.000129305	0.00330134	2.33204	down	protein_coding	NM_001141974	CCDS44072.1	ATP13A2	RefSeq	3694	chr1	-	17312452	17338423	ATGGCGTTAAGGTCCTGGTCCAGGGCACTGTCTTTGCCCGCATGGCCCCTGAGCAGAAGA	23400	probable cation-transporting ATPase 13A2 isoform 3	3.35066	4.57225
ASHGA5P044541	0.00259098	0.018853	2.33071	down	protein_coding	NM_022746	CCDS1526.1	MARC1	RefSeq	2258	chr1	+	220960038	220987741	GACCAGCGCGCTCCGGCCTTGCCGCCGCCACCTCGCGGAGAAGCCAGCCATGGGCGCCGC	64757	"MOSC domain-containing protein 1, mitochondrial precursor"	6.71526	7.93604
ASHGA5P013566	0.00455834	0.026369	2.32875	down	protein_coding	NM_001142683	CCDS46247.1	CCDC121	RefSeq	2762	chr2	-	27848505	27851745	TGGATTCCAGGTTTGCTGAGGGCCCCAGAAGGCTCCTTCCACCGTATCATAGTCTAATAA	79635	coiled-coil domain-containing protein 121 isoform 2	3.20743	4.42699
ASHGA5P054944	0.00190676	0.015863	2.32782	down	protein_coding	NM_004630	CCDS31599.1	SF1	RefSeq	3586	chr11	-	64532075	64546316	CCGGCATGATGTATGCCCCGCCCCCTCCTCCTCCGCCTCCCATGGACCCTTCTAACTTTG	7536	splicing factor 1 isoform 1	12.6156	13.8345
ASHGA5P018871	0.000299359	0.00551459	2.32691	down	protein_coding	NM_001127180	CCDS53684.1	MYO7A	RefSeq	7339	chr11	+	76839315	76926286	CTTCTTCGAGCAAACTACGGAGCCAAACTTCCCTGAGATCCTCCTAATTGCCATCAACAA	4647	unconventional myosin-VIIa isoform 2	3.41515	4.63356
ASHGA5P034421	0.00256709	0.0187597	2.32657	down	protein_coding	NM_144614	CCDS42483.1	MBD3L2	RefSeq	774	chr19	+	7049350	7051746	CTCTGAATTGTCACACTTTTCCCTTCCCCACCAGTTCTTTAATAAAAGTATTTGAAAGGC	125997	methyl-CpG-binding domain protein 3-like 2	6.78512	8.00333
ASHGA5P005081	0.00097236	0.0107551	2.32628	down	protein_coding	NM_032704	CCDS8782.1	TUBA1C	RefSeq	1581	chr12	+	49658864	49667113	TCTAGTCATGCGTGAGTGCATCTCCATCCACGTTGGCCAGGCTGGTGTCCAGATTGGCAA	84790	tubulin alpha-1C chain	3.26559	4.48361
ASHGA5P009236	0.000109937	0.00298648	2.32442	down	protein_coding	NM_139015	CCDS9208.1	SPPL3	RefSeq	4139	chr12	-	121200312	121342155	CCTACTCGTGGGCCTATTCCCTGGTGGATTCCAGTCAAGTGTCTACATTTCTGATTTCCA	121665	signal peptide peptidase-like 3	3.67128	4.88815
ASHGA5P045876	0.0200364	0.0629047	2.32263	down	protein_coding	NM_003692	CCDS6750.1	TMEFF1	RefSeq	2501	chr9	+	103235519	103339918	TGCTTCTGCTCTTCGCCTTCTCTCTGCCCGGGAGCCGCGCGTCCAACCAGCCCCCGGGTG	8577	tomoregulin-1 precursor	6.2	7.41576
ASHGA5P011604	0.000194562	0.00427836	2.32205	down	protein_coding	NM_016520	CCDS6931.1	C9orf78	RefSeq	1835	chr9	-	132589563	132597572	ACGGGGTGAGTGCTGTGGCCTTGCTGGTGGGAGAGAAGGTACAAGAGGAGACCACTCTAG	51759	uncharacterized protein C9orf78	4.58406	5.79946
ASHGA5P039864	0.0178791	0.0587787	2.31995	down	protein_coding	NM_022836	CCDS866.1	DCLRE1B	RefSeq	3795	chr1	+	114447914	114456708	ACTGTCCTGGTTCTGTCATGTTTCTCTTTGAAGGATATTTTGGAACCATCCTCTACACAG	64858	5' exonuclease Apollo	3.81756	5.03165
ASHGA5P049841	0.00682943	0.0326273	2.31926	down	protein_coding	NM_015353	CCDS32728.1	KCTD2	RefSeq	3714	chr17	+	73043278	73061981	GGAGGGGGCGGCGGGAGTGGGGTGGGCGACGGGGGTGGCCCAGTCCGCGGGCCCCCCAGC	23510	BTB/POZ domain-containing protein KCTD2	5.20681	6.42048
ASHGA5P016673	0.0019984	0.0163385	2.31811	down	protein_coding	ENST00000432826	CCDS46173.1	TARM1	GENCODE	897	chr19	-	54573200	54584634	CATGATCCCTAAGCTGCTTTCCCTCCTCTGTTTCAGACTGTGCGTGGGCCAAGGAGACAC	441864	"T cell-interacting, activating receptor on myeloid cells 1 [Source:HGNC Symbol;Acc:37250]"	5.30692	6.51987
ASHGA5P047482	0.000937694	0.0105329	2.31468	down	protein_coding	NM_001171933	CCDS53540.1	CDH23	RefSeq	4341	chr10	+	73555527	73575704	AAGCTCTTTGCACAGCGGATGGTGCAAAAAGCCTCCTCCTGCCACTCCTCCATCTCTGAG	64072	cadherin-23 isoform 6	6.2915	7.50232
ASHGA5P001309	0.0118901	0.0459154	2.30967	down	protein_coding	NM_006278	CCDS8474.1	ST3GAL4	RefSeq	2053	chr11	+	126225788	126284536	ATGGTGTGGTATTCCATCTCCCGGGAAGACAGTTTTTATTTTCCCATCCCAGAGAAGAAG	6484	"CMP-N-acetylneuraminate-beta-galactosamide- alpha-2,3-sialyltransferase 4 isoform 1 precursor"	5.21521	6.4229
ASHGA5P010872	0.0324361	0.0830844	2.30793	down	protein_coding	NM_001077469	CCDS44261.1	NR1I3	RefSeq	1248	chr1	-	161199455	161208000	GGAGCCCGTGTGGGGTTCCAGGTAGAGTTTTTGGAGTTGCTCTTTCACTTCCATGGAACA	9970	nuclear receptor subfamily 1 group I member 3 isoform 6	4.37428	5.58088
ASHGA5P004680	0.00291281	0.020135	2.30781	down	protein_coding	NM_175769	CCDS33163.1	TCF23	RefSeq	786	chr2	+	27371944	27375819	CCCTCTCAAGAAGTGGCCGATGCGATCTCGTCTCTATGCTGGAGGCCTGGGGTACTCCGA	150921	transcription factor 23	3.79333	4.99985
ASHGA5P053646	0.0100972	0.0412928	2.30694	down	protein_coding	NM_000077	CCDS6510.1	CDKN2A	RefSeq	1267	chr9	-	21967750	21975132	CGGCGGCTGCGGAGAGGGGGAGAGCAGGCAGCGGGCGGCGGGGAGCAGCATGGAGCCGGC	1029	cyclin-dependent kinase inhibitor 2A isoform p16INK4a	5.14834	6.35432
ASHGA5P036285	0.000962884	0.0107318	2.30621	down	protein_coding	ENST00000410062	CCDS2282.1	UBE2E3	GENCODE	1543	chr2	+	181845341	181928150	ACAGCTGCCTCCATTTCCTTAAGGAAGGGTTTTTTTCTCTCTCCCTCCCCCACACCGTAG	10477	ubiquitin-conjugating enzyme E2E 3 [Source:HGNC Symbol;Acc:12479]	10.9887	12.1943
ASHGA5P020770	2.79052e-05	0.00136015	2.30508	down	protein_coding	NM_001193503	CCDS54070.1	ENO3	RefSeq	1365	chr17	+	4854383	4860426	ACTAAGAGACGGAGACAAAGGCCGCTACCTGGGGAAAGCCAAGTTTGGGGCCAATGCCAT	2027	beta-enolase isoform 2	3.02197	4.22679
ASHGA5P006831	0.00701787	0.0330365	2.30489	down	protein_coding	NM_153823	CCDS44835.1	GSG1	RefSeq	2544	chr12	-	13236470	13248740	TTTCATTGAACTTACACCACCAGCCAAGAGAGAAATCCTATGGTTATCCCTGGGAACGCA	83445	germ cell-specific gene 1 protein isoform 2	3.02282	4.22751
ASHGA5P049173	0.00201794	0.0164156	2.30414	down	protein_coding	NM_014771	CCDS10691.1	RNF40	RefSeq	6022	chr16	+	30772932	30787628	AGAGCTGGAGAAACTGCAGGCCGAACTTCAGGGGGCTGTGCGGACCAATGAGCGCCTCAA	9810	E3 ubiquitin-protein ligase BRE1B isoform 1	3.62564	4.82987
ASHGA5P013485	0.00185278	0.0156436	2.30398	down	protein_coding	ENST00000394168	CCDS34451.1	KIAA0240	GENCODE	6515	chr6	+	42788793	42836296	GTCGGATCACTAGTTTGTCATGGATGATGATGATGACTCGTGTCTCCTTGATCTTATTGG	23506	KIAA0240 [Source:HGNC Symbol;Acc:21111]	3.03258	4.23671
ASHGA5P046135	0.017329	0.0577276	2.30224	down	protein_coding	NM_030624	CCDS35217.1	KLHL15	RefSeq	6290	chrX	-	24001832	24045303	ACCGATACCATCATTCAGAATATCCGGTTTTGCTTGATGACCCCAACCAGCGTTTTTGAG	80311	kelch-like protein 15	4.27469	5.47773
ASHGA5P004811	0.0170901	0.0571746	2.29668	down	protein_coding	NM_015496	CCDS34923.1	KIAA1429	RefSeq	6456	chr8	-	95500004	95565746	TGACACAATTGGATGCTGTGGAGATGATAATGGTCTCATGGAAGTAGAGGGAGCTCATAC	25962	protein virilizer homolog isoform 1	2.82139	4.02094
ASHGA5P010518	0.00212991	0.0168589	2.29284	down	protein_coding	ENST00000361773	CCDS10713.1	TGFB1I1	GENCODE	1773	chr16	+	31483528	31489281	GGATCCCCGGATGCCCTGCTCTCTGACCTGGAGACTACCACCTCGCACATGCCAAGGTCA	7041	transforming growth factor beta 1 induced transcript 1 [Source:HGNC Symbol;Acc:11767]	6.75601	7.95314
ASHGA5P012829	0.0212834	0.0653842	2.29274	down	protein_coding	NM_001037442	CCDS34001.1	RUFY3	RefSeq	4435	chr4	+	71587695	71674336	TAATCAGATGGCTGCTACCATTAAACAACTTGAACAAAGATTGCGCCAGGCTGAGCGAAG	22902	protein RUFY3 isoform 1	3.75558	4.95265
ASHGA5P003441	0.00882054	0.0380097	2.28305	down	protein_coding	ENST00000432069	CCDS42176.1	NOL3	GENCODE	1885	chr16	+	67204404	67209643	GTGGGTCCGGGCTACCGGGACCGCAGCTATGACCCTCCATGCCCAGGCCACTGGACGCCG	8996	nucleolar protein 3 (apoptosis repressor with CARD domain) [Source:HGNC Symbol;Acc:7869]	4.7084	5.89937
ASHGA5P007580	0.00492408	0.0273957	2.28166	down	protein_coding	ENST00000334534	CCDS33439.1	C20orf94	GENCODE	1407	chr20	+	10415950	10604027	AAACCCCGCCACCATCATAGGTCTGTAGTTACTGTGGAATCAATAAGCCATGGCATCTAA	128710	chromosome 20 open reading frame 94 [Source:HGNC Symbol;Acc:16225]	7.64657	8.83665
ASHGA5P026346	0.00303195	0.0206598	2.28012	down	protein_coding	NM_021117	CCDS7915.2	CRY2	RefSeq	4204	chr11	+	45868956	45904799	TGGGCGGGCTATGGGCGGGGTCCACGTCGCCTACCGGGGCGGAGCGGGGGTGGCTGGAGC	1408	cryptochrome-2 isoform 1	5.22354	6.41265
ASHGA5P037979	0.000598678	0.00850701	2.27953	down	protein_coding	NM_007032	CCDS43016.1	TRIOBP	RefSeq	4753	chr22	+	38142240	38172563	CGAGAGCCGCGTCCACGTTCCTGCCTCCTGCTCCCGCCGCCCTGGGGCGCCGCCATGACG	11078	TRIO and F-actin-binding protein isoform 1	7.98795	9.17669
ASHGA5P046115	0.00295857	0.0203229	2.27621	down	protein_coding	NM_001001994	CCDS48084.1	GPM6B	RefSeq	1533	chrX	-	13792092	13956831	GTCCCCGGGGAGCCCGAACGCCCCGCAGCCCTCACCCCTCCCGCCAGTCTCCAGCCATGG	2824	neuronal membrane glycoprotein M6-b isoform 4	10.4541	11.6407
ASHGA5P023589	0.00495548	0.0275168	2.27428	down	protein_coding	NM_001193654	CCDS32776.1	C17orf62	RefSeq	2387	chr17	-	80400462	80408707	AAGAAACGAGCGCTCGACCCCTCCTCCTGTAGAGAGTGGTGCTGCCCTCTCGGGATGTAC	79415	uncharacterized protein C17orf62 isoform a	7.82827	9.01368
ASHGA5P034937	0.0276037	0.0759586	2.27391	down	protein_coding	NM_021933	CCDS143.1	MIIP	RefSeq	1801	chr1	+	12079298	12092106	AGGCAGCTGTGGGTGGGGCAGGATGCTGTGCGGCGGTCAGTGGCCAGGGCAGCCTCGGAG	60672	migration and invasion-inhibitory protein	3.96281	5.14799
ASHGA5P049656	0.0162208	0.0554686	2.27236	down	protein_coding	NM_001079518	CCDS42315.1	MED24	RefSeq	3718	chr17	-	38175349	38210889	TTCACCTCAAAGCTGGCCGCCACCGCTGCCACCTGCTCAGAGTGAAATAATGAAGGTGGT	9862	mediator of RNA polymerase II transcription subunit 24 isoform 2	7.52525	8.70944
ASHGA5P002297	0.00296811	0.0203631	2.26959	down	protein_coding	ENST00000435432	CCDS45876.1	NEDD4L	GENCODE	8406	chr18	+	55816564	56068772	TCACCGACGCAGTTGCAGAACAGGGCCATCTACCACCGCCATCAGTGGCCTATGTACATA	23327	"neural precursor cell expressed, developmentally down-regulated 4-like, E3 ubiquitin protein ligase [Source:HGNC Symbol;Acc:7728]"	4.2051	5.38753
ASHGA5P013386	0.00570958	0.0295524	2.26636	down	protein_coding	NM_020701	CCDS43149.1	ISY1	RefSeq	3778	chr3	-	128846258	128880073	ATTTGCCTGGTGTTAGAGAGCTGTTTGAAAAAGAACCTCTTCCTCCTCCCAGAAAGACAC	57461	pre-mRNA-splicing factor ISY1 homolog isoform 2	6.72079	7.90116
ASHGA5P048781	0.000107457	0.0029704	2.26603	down	protein_coding	NM_025240	CCDS10251.1	CD276	RefSeq	2765	chr15	+	73976621	74006859	TGACCATGAGGACCAGGGAGCTGCTACCCCTCCCTACAGCTCCTACCCTCTGGCTGCAAT	80381	CD276 antigen isoform b precursor	8.88389	10.0641
ASHGA5P049753	0.0153622	0.0535942	2.26599	down	protein_coding	NM_001144070	CCDS45739.1	ABCC3	RefSeq	1958	chr17	+	48712217	48745288	TCCACACCACAACCACCTTCACCTGGATGTGCAGCCCCTTCCTGGTGAGGCTTGGCACAG	8714	canalicular multispecific organic anion transporter 2 isoform 2	6.45868	7.63882
ASHGA5P000830	0.0185316	0.0600069	2.26503	down	protein_coding	NM_001145798	CCDS54409.1	CACNB4	RefSeq	7793	chr2	-	152689285	152955593	ATGCCCCCCAAGTCAGCGAATGAGGCACAGCAACCACTCCACAGAGAACTCTCCAATTGA	785	voltage-dependent L-type calcium channel subunit beta-4 isoform d	10.0955	11.275
ASHGA5P051801	0.0294245	0.0784678	2.26258	down	protein_coding	NM_018622	CCDS3248.1	PARL	RefSeq	1423	chr3	-	183547172	183602693	TGGGGCAGAGGTTGGGAAGATGGCGTGGCGAGGCTGGGCGCAGAGAGGCTGGGGCTGCGG	55486	"presenilins-associated rhomboid-like protein, mitochondrial isoform 1 preproprotein"	6.55732	7.73529
ASHGA5P005363	0.0034822	0.0223523	2.26138	down	protein_coding	ENST00000304519	CCDS47800.1	C8orf74	GENCODE	1036	chr8	+	10530146	10558103	GAAACCAAAGGCTGCTCCATTACTGAGGCTGTGACGATCCTGGGGAACAAGCTTAGAGAT	203076	chromosome 8 open reading frame 74 [Source:HGNC Symbol;Acc:32296]	3.50107	4.67828
ASHGA5P008267	0.0038942	0.023869	2.25999	down	protein_coding	NM_205850	CCDS10128.1	SLC24A5	RefSeq	1617	chr15	+	48413168	48434589	AATACTTCCTACCCTCCCTGGAAATCATCAGTGAATCCCTTGGATTGTCTCAGGATGTTG	283652	sodium/potassium/calcium exchanger 5 precursor	8.24252	9.41883
ASHGA5P026648	0.00128631	0.0127096	2.25542	down	protein_coding	NM_003369	CCDS8241.1	UVRAG	RefSeq	5166	chr11	+	75526211	75855282	GCTGCTCTGCCTCCCGGTTCTGCCGCGCGGGCCCTGCATGTGGAGCTGCCGTCTCAGCAG	7405	UV radiation resistance-associated gene protein	6.28406	7.45745
ASHGA5P037579	0.00838469	0.0368134	2.25429	down	protein_coding	NM_001039775		AIM1L	RefSeq	5245	chr1	-	26648349	26680621	TGAAGGGAGCCCCATCTCATCTCTCACCCAGAAAGAGGTTGTGCAGGACCCTGATGCTCT	55057	absent in melanoma 1-like protein	4.99669	6.16936
ASHGA5P002395	0.00149105	0.013746	2.25382	down	protein_coding	NM_000784	CCDS2423.1	CYP27A1	RefSeq	2388	chr2	+	219646471	219680016	AATTGAAGTTGATGGCTTCCTCTTCCCCAAGAACACCCAGTTTGTGTTCTGCCACTATGT	1593	"sterol 26-hydroxylase, mitochondrial precursor"	4.77658	5.94895
ASHGA5P032660	0.00129963	0.0127447	2.25251	down	protein_coding	NM_033452	CCDS32737.1	TRIM47	RefSeq	2268	chr17	-	73870244	73874656	CGCCTGGTGCCGCCGCTGCGCCGGCTAGAGGAGAGCCTGTGCCCGCGCCACCTACGGCCG	91107	tripartite motif-containing protein 47	5.57576	6.7473
ASHGA5P030524	0.0169013	0.0568767	2.25221	down	protein_coding	NM_001025248	CCDS32231.1	DUT	RefSeq	2146	chr15	+	48623620	48635570	GGGCCGCTGGCTGGAAGGGCGAGCTTCCTAAGGCGGGGGGAAGCCCGGCGCCGGGGCCGG	1854	"deoxyuridine 5'-triphosphate nucleotidohydrolase, mitochondrial isoform 1 precursor"	5.02112	6.19246
ASHGA5P045588	0.00460022	0.0264039	2.25153	down	protein_coding	NM_015158	CCDS34976.1	KANK1	RefSeq	5090	chr9	+	504694	746106	TAAAATTTGCATGACTCCTCACTCCTTTCTGGATCTCTCATTGGACTCAAGCCAGCATGG	23189	KN motif and ankyrin repeat domain-containing protein 1 isoform a	4.17055	5.34146
ASHGA5P037982	0.00265782	0.0190805	2.25143	down	protein_coding	NM_001136497	CCDS44146.1	BTF3L4	RefSeq	4576	chr1	+	52521856	52556388	GGAGAGCAAATTGGAAAACAGTTCTATTTATCCTCCTCCCTCCCCAGTAGAAATAAAAAA	91408	transcription factor BTF3 homolog 4 isoform 2	10.8562	12.027
ASHGA5P014697	0.0393379	0.0921024	2.25095	down	protein_coding	NM_001001329	CCDS45977.1	PRKCSH	RefSeq	2253	chr19	+	11546268	11561782	GCAGCCCAAGCCGGCCAGCCCTGCTGAGGAAGACAAAATGCCGCCCTACGACGAGCAGAC	5589	glucosidase 2 subunit beta isoform 2 precursor	5.60691	6.77745
ASHGA5P039248	0.0116899	0.0453095	2.25053	down	protein_coding	NM_153690	CCDS33923.1	FAM43A	RefSeq	3182	chr3	+	194406621	194409766	AAGTAGCACTGTTCTGGTTCTGTTTGCACGCCAGTGGGGAGAGAATAAAGAGGAAAATTT	131583	protein FAM43A	4.91278	6.08304
ASHGA5P014660	0.00105421	0.0112335	2.24989	down	protein_coding	NM_032777	CCDS6097.2	GPR124	RefSeq	6050	chr8	+	37654400	37701504	AATGTTTCTCTGTCGTCCTTCCACATCAAGAACAGCGTGGCCCTGGCCTCCATCCAGCTG	25960	G-protein coupled receptor 124 precursor	4.99188	6.16174
ASHGA5P054551	0.00271451	0.0192971	2.24916	down	protein_coding	NM_002629	CCDS7458.1	PGAM1	RefSeq	1762	chr10	+	99186026	99193198	GGTGCCGCATCCCCAGCCCGCCGCCATGGCCGCCTACAAACTGGTGCTGATCCGGCACGG	5223	phosphoglycerate mutase 1	7.94682	9.1162
ASHGA5P039820	0.0418368	0.0955264	2.24855	down	protein_coding	NM_001256855		LOC100287238	RefSeq	1593	chr4	+	9226621	9228214	GAAAGAGCCACTCAGGAAAGCACCTTAGACCGCTGGAAATTCCTTCAAGAGCAAAACAAA	100287238	ubiquitin carboxyl-terminal hydrolase 17-like	3.95705	5.12605
ASHGA5P007373	0.0232308	0.069015	2.24706	down	protein_coding	NM_001614	CCDS11782.1	ACTG1	RefSeq	2004	chr17	-	79476996	79479892	TTCTCTGCCGGTCGCAATGGAAGAAGAGATCGCCGCGCTGGTCATTGACAATGGCTCCGG	71	"actin, cytoplasmic 2"	4.66206	5.8301
ASHGA5P007711	0.00358298	0.0227271	2.24639	down	protein_coding	NM_133328	CCDS12597.1	DEDD2	RefSeq	1951	chr19	-	42702744	42721944	CCAGAATCTGGCCGGGTTCTGAGCTTGTTCCGCCTCCCTCCCCCGGGAATGGCGCTATCC	162989	DNA-binding death effector domain-containing protein 2 isoform 1	9.97663	11.1442
ASHGA5P018856	0.000523521	0.00781969	2.24038	down	protein_coding	ENST00000458322	CCDS48062.1	NDOR1	GENCODE	4829	chr9	+	140100118	140113813	ATCGCCTCCTCGCTGCTGATCCTCGTGGCTGTAGTGCAGTTCCAGACTCGCCTCAAGGAG	27158	NADPH dependent diflavin oxidoreductase 1 [Source:HGNC Symbol;Acc:29838]	7.19025	8.354
ASHGA5P000844	0.00269325	0.0191995	2.23912	down	protein_coding	NM_003365	CCDS2774.1	UQCRC1	RefSeq	1636	chr3	-	48636431	48647098	CCGCCGCTCGCCGGCCCTGCTGCGGACGCCAGCCTTGCGGAGTACGGCAACCTTCGCTCA	7384	"cytochrome b-c1 complex subunit 1, mitochondrial precursor"	6.36698	7.52991
ASHGA5P048358	0.00516618	0.0280682	2.23682	down	protein_coding	NM_175885	CCDS31648.1	FAM181B	RefSeq	1875	chr11	-	82443045	82444906	CAGTGTCCTAGTCCCTCCCTTCCCTCTCCTTGAGTGCATTTTGAATTAAAGCCTATATTG	220382	protein FAM181B	11.3904	12.5519
ASHGA5P011051	0.00188003	0.0157628	2.23395	down	protein_coding	ENST00000368954	CCDS973.1	CERS2	GENCODE	2504	chr1	-	150937648	150947479	CTGCCGCCGGGATGCTCCAGACCTTGTATGATTACTTCTGGTGGGAACGTCTGTGGCTGC	29956	ceramide synthase 2 [Source:HGNC Symbol;Acc:14076]	4.67081	5.83041
ASHGA5P018455	0.00325319	0.0215497	2.23383	down	protein_coding	NM_001136032	CCDS12819.1	KLK11	RefSeq	1195	chr19	-	51525486	51529872	CCCAGAGCCTAGGAACCTGGGGCCCGCTCCTCCCCCCTCCAGGCCATGAGGATTCTGCAG	11012	kallikrein-11 isoform 1 precursor	10.7687	11.9283
ASHGA5P050960	0.00262559	0.018956	2.23223	down	protein_coding	NM_181466	CCDS13250.1	EIF6	RefSeq	1078	chr20	-	33866708	33872619	AGTCCATGTCCCTACAGTGTGTTCGAGGGCGAGCTCTCCGATACCATCCCCGTGGTGCAC	3692	eukaryotic translation initiation factor 6 isoform c	6.00142	7.15991
ASHGA5P030637	0.00666226	0.0321804	2.23041	down	protein_coding	NM_018652	CCDS10245.2	GOLGA6B	RefSeq	3178	chr15	+	72947037	72959738	CCCCACCCCATGATGTTAGAAGAATCTCGACAGAATAAATTGGCAGCAGCCAAGAAAAAG	55889	putative golgin subfamily A member 6B	7.77955	8.93686
ASHGA5P008098	0.0110478	0.0438398	2.22884	down	protein_coding	NM_001005388	CCDS53460.1	NFASC	RefSeq	10351	chr1	+	204797781	204991950	CCAACCGCAGCTCCTCCCACATTGCCCCCGACTACCGTGGGTGCGACGGGCGCTGTGAGC	23114	neurofascin isoform 1 precursor	6.54976	7.70606
ASHGA5P010327	0.005895	0.0299803	2.22854	down	protein_coding	ENST00000360797	CCDS32638.1	PCGF2	GENCODE	2604	chr17	-	36890149	36904558	AGATTGTCAGCCTCTCCATCGAATTCTACGAAGGTGCCAGGGACCGGGACGAGAAGAAGG	7703	polycomb group ring finger 2 [Source:HGNC Symbol;Acc:12929]	4.00122	5.15732
ASHGA5P005574	2.67558e-05	0.00134931	2.22848	down	protein_coding	NM_021094	CCDS8686.1	SLCO1A2	RefSeq	7225	chr12	-	21417533	21487832	AAATGTGGTGAGTCAGGGGCATGCAGGATATATGATTCCACCACCTTCAGATACATCTAC	6579	solute carrier organic anion transporter family member 1A2	2.8774	4.03346
ASHGA5P052669	0.00619413	0.0308254	2.22821	down	protein_coding	NM_001002029	CCDS47405.1	C4B	RefSeq	5444	chr6	+	31949833	31970458	AGAAGGTAGCAGACAGACAGACGGATCTAACCTCTCTTGGATCCTCCAGCCATGAGGCTG	721	complement C4-B preproprotein	3.35037	4.50625
ASHGA5P008184	0.0342519	0.0853218	2.22735	down	protein_coding	NM_133499	CCDS35233.1	SYN1	RefSeq	3172	chrX	-	47431299	47479256	CCCAGCTCAAAGCCAGCCCCGCCCAGGCCCAGCCTTAGCCAGGACGAGGTGAAAGCTGAG	6853	synapsin-1 isoform Ib	7.73482	8.89015
ASHGA5P030359	0.0184782	0.059929	2.22728	down	protein_coding	NM_018958	CCDS10015.1	NPAP1	RefSeq	8053	chr15	+	24920540	24928593	TTGTTTACTTGACTGAATCCCTTCCTTTTCCAGAAACCTTGAGCCTCCTCCACTGGTTTG	23742	protein C15orf2	6.73678	7.89207
ASHGA5P046593	0.000802044	0.00968477	2.22647	down	protein_coding	NM_000052	CCDS35339.1	ATP7A	RefSeq	8499	chrX	+	77166193	77305892	TTTGACACACCCCCTATGCTGTTTGTGTTTATTGCACTAGGCCGATGGCTGGAACATATA	538	copper-transporting ATPase 1	6.52867	7.68343
ASHGA5P019589	0.00505103	0.0277834	2.22567	down	protein_coding	ENST00000576860		AC103702.1	GENCODE	427	chr17	+	46679852	46683772	CAGCCGCCAGCCGTTTCCTCTCCCTCGCCGGCCTCGGCGGAGATTCCAGGCCCTATAGAA			5.83946	6.9937
ASHGA5P002361	0.00093318	0.0105158	2.22322	down	protein_coding	NM_005480	CCDS8784.1	TROAP	RefSeq	2618	chr12	+	49716970	49725514	TATCTGCTCACTCCAGTCTTTGAGACCCCCAGCAGGCCAGGCAGGCCTCAGCAATCTGGC	10024	tastin isoform 1	6.87496	8.02761
ASHGA5P026997	0.00669561	0.0322484	2.22218	down	protein_coding	ENST00000360168	CCDS53738.1	SCNN1A	GENCODE	3481	chr12	-	6456008	6484390	CCAGAGCTCAGCCTTGACCCTGACCCTTGCTCTCCCCAATCCACTCCGGGGCTCATGAAG	6337	"sodium channel, non-voltage-gated 1 alpha subunit [Source:HGNC Symbol;Acc:10599]"	8.21132	9.36329
ASHGA5P041327	0.0341468	0.0852607	2.21824	down	protein_coding	NM_177478	CCDS4128.1	FTMT	RefSeq	894	chr5	+	121187649	121188523	AAAGTCAGCTGTCTCCTGCTTTCTTGCCCTTAAAATCACCTCCATCTTTATATTCTTCTG	94033	"ferritin, mitochondrial precursor"	4.79499	5.94441
ASHGA5P019832	0.00112251	0.0117282	2.21706	down	protein_coding	NM_001194956	CCDS54908.1	MATR3	RefSeq	4193	chr5	+	138629438	138667366	TAGGGCGGCGGAGGAGTGGAGTCAACATATCAATGGAGCAAGTCACAGTCGTCGATGCCA	9782	matrin-3 isoform b	3.44383	4.59247
ASHGA5P029017	0.00515899	0.0280682	2.21531	down	protein_coding	NM_005399	CCDS925.1	PRKAB2	RefSeq	5431	chr1	-	146626684	146644129	AGGAGGTCTTCATCTCTGGGTCCTTCAACAATTGGAGCACCAAGATTCCACTGATTAAGA	5565	5'-AMP-activated protein kinase subunit beta-2	3.81579	4.9633
ASHGA5P030673	0.00152856	0.0139654	2.21406	down	protein_coding	NM_001101404	CCDS45315.1	SH2D7	RefSeq	1892	chr15	+	78384926	78396393	CCCCTTCATTCTGCAGAACGGTGCCCTGCCTCCCTGGTTTCATGGATTCATCACCCGCAA	646892	SH2 domain-containing protein 7	7.16379	8.31048
ASHGA5P004560	0.00307529	0.0207885	2.21176	down	protein_coding	NM_012205	CCDS33187.1	HAAO	RefSeq	1301	chr2	-	42994228	43019751	CCCCCATCATCCAGGAGTTCTTCAGCTCTGAGCAGTACAGAACAGGAAAGCCCATCCCTG	23498	"3-hydroxyanthranilate 3,4-dioxygenase"	4.95432	6.09952
ASHGA5P041725	0.00135349	0.0129464	2.21134	down	protein_coding	ENST00000303324	CCDS4641.1	OR2B2	GENCODE	1212	chr6	-	27878962	27880174	CAAAAAGCTATATTTGTTTCTGTTGCCTAAACATTTTCATTGAACAAGCCCCCAGAATTG	81697	"olfactory receptor, family 2, subfamily B, member 2 [Source:HGNC Symbol;Acc:13966]"	4.5403	5.68522
ASHGA5P014789	0.00673188	0.0323632	2.21054	down	protein_coding	NM_001145713	CCDS54285.1	SAE1	RefSeq	2323	chr19	+	47634079	47713893	CTCCTTCAAGGCCCTGTCTCAGCGGGACCCTCCTCACAACAACTTCTTCTTCTTCGATGG	10055	SUMO-activating enzyme subunit 1 isoform b	5.92249	7.06688
ASHGA5P006053	0.0218302	0.0663619	2.20832	down	protein_coding	NM_138415	CCDS14061.1	PHF21B	RefSeq	3671	chr22	-	45277042	45405581	TGACAACAAGCCTCCTCCACGCCTCCTCTCTTCCCCTCACCCCGCAACCCATCACTGTCC	112885	PHD finger protein 21B isoform 1	10.8344	11.9774
ASHGA5P054479	0.0140208	0.0508473	2.20435	down	protein_coding	NM_018055	CCDS7304.1	NODAL	RefSeq	2086	chr10	-	72191691	72201465	CCAGCCCACCATGCACGCCCACTGCCTGCCCTTCCTTCTGCACGCCTGGTGGGCCCTACT	4838	nodal homolog precursor	9.19206	10.3324
ASHGA5P053304	0.00171685	0.0149216	2.20213	down	protein_coding	NM_001174164	CCDS55160.1	PRRT4	RefSeq	3562	chr7	-	127990378	128001739	TGGCGGCCGCCGCCGCCCTCGGGAGCGCCGCGCATCGCCCGCTGCGGCCCCTGCGGCTCG	401399	proline-rich transmembrane protein 4 isoform 1 precursor	6.58959	7.72849
ASHGA5P034963	0.0107023	0.0428892	2.19786	down	protein_coding	NM_015955	CCDS1776.1	MEMO1	RefSeq	1831	chr2	-	32092893	32235698	TGGGAGGGGAGGGGGCCGTGGGGGCGGCTCGGCGGAACCAGCCCCGGCTGGGCAGCAGCG	51072	protein MEMO1 isoform 1	5.22858	6.36468
ASHGA5P052764	0.000548132	0.00808409	2.19453	down	protein_coding	NM_016571	CCDS4964.1	LGSN	RefSeq	5634	chr6	-	63985855	64029882	ATGTGATACCTTCACTGTGACTGGTGAGCCTCTTTTGACTTCCCCAAGGTACATTGCAAA	51557	lengsin isoform a	4.30319	5.4371
ASHGA5P044580	0.0223442	0.0673432	2.19384	down	protein_coding	ENST00000542437	CCDS55280.1	CCDC166	GENCODE	1320	chr8	-	144788863	144790279	TGTCCTCACAGGACACTCTCCGCTCCACGAAGTCTGGCCCCAAGCTTCTCTCTGGCCTGT	100130274	coiled-coil domain containing 166 [Source:HGNC Symbol;Acc:41910]	7.44128	8.57474
ASHGA5P004180	0.0264093	0.0740113	2.19331	down	protein_coding	NM_182947	CCDS8947.1	ARHGEF25	RefSeq	2563	chr12	+	58005217	58011028	GGGGGACGTGAATCCTATTCCATTGCGGGCAGTGAGGGGAGTATATCGGCTTCTGCTGCC	115557	rho guanine nucleotide exchange factor 25 isoform 1	4.25958	5.39269
ASHGA5P044307	0.00561002	0.0292206	2.19315	down	protein_coding	NM_001080416	CCDS47867.1	MYBL1	RefSeq	5188	chr8	-	67474409	67525480	ACTAAAAAGAAACCAAACCCTAACACTTCCAAAGTTGTCAAATTGGAAAAGAATCTTCAG	4603	myb-related protein A isoform 1	4.51115	5.64415
ASHGA5P034731	0.00141853	0.0133801	2.19314	down	protein_coding	NM_001195076	CCDS54296.1	C19orf81	RefSeq	765	chr19	+	51152701	51162567	CAGAGGTGGAGCCCGTGTGCTTCCCTGCCATGGGCAGCCCCACCATGCACAGGAAGGCAG	342918	putative uncharacterized protein C19orf81	3.40197	4.53496
ASHGA5P004192	0.00838754	0.0368134	2.18872	down	protein_coding	NM_001040701	CCDS12152.1	FUT6	RefSeq	3009	chr19	-	5830636	5839742	GCCCCCCCAGATACTCTGACCCATGGATCCCCTGGGCCCGGCCAAGCCACAGTGGTCGTG	2528	"alpha-(1,3)-fucosyltransferase"	11.8413	12.9714
ASHGA5P002746	0.00244055	0.0181342	2.18792	down	protein_coding	NM_024761	CCDS6520.1	MOB3B	RefSeq	6528	chr9	-	27325206	27529850	ATTTCCAACATGCGTGGGTGTTCCCTTCCCAAAGAACTTCCTTCAGATCTGCAAGAAGAT	79817	MOB kinase activator 3B	4.16299	5.29255
ASHGA5P005860	0.000769219	0.00956733	2.18616	down	protein_coding	NM_145170	CCDS7324.3	TTC18	RefSeq	3714	chr10	-	75013515	75118617	TAGCCCTAAACCAGACCATGCCAGATGATGTCCAAGGCACTGTTGCAACCATTTATACAA	118491	tetratricopeptide repeat protein 18	3.63456	4.76296
ASHGA5P048777	0.00212181	0.0168225	2.18416	down	protein_coding	NM_020214	CCDS10241.2	PARP6	RefSeq	2631	chr15	-	72533521	72563628	CCCCAGGCAGGTCTCCTGTGCCCTCAGCACGTGGGCCTCCCTCCCCCAGCACGGACCTCT	56965	poly [ADP-ribose] polymerase 6	10.7179	11.845
ASHGA5P006232	0.00936879	0.0395372	2.18326	down	protein_coding	NM_001145400	CCDS45536.1	ADAD2	RefSeq	2076	chr16	+	84224722	84230772	CAGCCACCAGGTCCCTGCTTCCCCTTCTCGGTGAGCGCGGAACTGGATGGGGTGGTCTGC	161931	adenosine deaminase domain-containing protein 2 isoform 2	6.40263	7.52912
ASHGA5P050042	0.0297719	0.0790783	2.18304	down	protein_coding	ENST00000330475	CCDS12071.1	ADAMTSL5	GENCODE	2857	chr19	-	1505016	1513188	TGTTCCCCAGGCCCCACCTCTTCCAGAACCTCCTGCTCTTCCTGTGGGCCCTGCTGAACT	339366	ADAMTS-like 5 [Source:HGNC Symbol;Acc:27912]	8.70479	9.83113
ASHGA5P001422	0.00531563	0.0285311	2.18175	down	protein_coding	NM_004394	CCDS3880.1	DAP	RefSeq	2385	chr5	-	10679341	10761387	TCCACCTAAACCCACTGTGTTCATCTCTGGGGTCATCGCCCGGGGTGACAAAGATTTCCC	1611	death-associated protein 1	3.70669	4.83217
ASHGA5P053288	0.0173414	0.0577287	2.18076	down	protein_coding	NM_014888	CCDS5782.1	FAM3C	RefSeq	2552	chr7	-	120988904	121036422	GACTGAGCGCTGGGAGGCCGGAAGGCGGGCGCGCGCGGCGGAGAGGCGGGCGGGAGGCCG	10447	protein FAM3C precursor	3.29666	4.42149
ASHGA5P010472	0.00168603	0.0148065	2.18053	down	protein_coding	NM_001171167	CCDS54072.1	CAMTA2	RefSeq	4852	chr17	-	4871286	4890665	GCGGTAGATGGGCACAGACTCCCCCTCCCCCCGGCCCCTCAGGCCGGGGGTGACCTTGCC	23125	calmodulin-binding transcription activator 2 isoform 4	10.4471	11.5718
ASHGA5P032011	0.00665521	0.0321724	2.17688	down	protein_coding	NM_001113525	CCDS45554.1	ZNF276	RefSeq	4621	chr16	+	89787951	89807332	GGACTCGGGGCCGCCCTTCCCTTAGCGGTGGGCCGAGGGTGGACGGGGCGACGGCGCGGC	92822	zinc finger protein 276 isoform a	4.70212	5.82439
ASHGA5P005094	0.00635073	0.03139	2.17672	down	protein_coding	NM_021102	CCDS12510.1	SPINT2	RefSeq	1817	chr19	+	38755097	38783254	ACCAAGGAGGAGTGCCTCAAGAAATGTGCCACTGTCACAGAGAATGCCACGGGTGACCTG	10653	kunitz-type protease inhibitor 2 isoform a precursor	3.27852	4.40067
ASHGA5P012072	0.00213349	0.0168639	2.17485	down	protein_coding	NM_001135248	CCDS44071.1	MFAP2	RefSeq	1121	chr1	-	17300998	17307173	ACCCGGACAGCTGTCCTCTCTGACACCACCCCGGCCTGCCTCTTTGTTGCCATGAGAGCT	4237	microfibrillar-associated protein 2 isoform b precursor	9.35227	10.4732
ASHGA5P035333	0.0463759	0.10127	2.17459	down	protein_coding	ENST00000409817	CCDS33295.1	CXCR4	GENCODE	1895	chr2	-	136871918	136873813	TAACTGGGTTAATGCTTGCTGAATTGGAAGTGAATGTCCATTCCTTTGCCTCTTTTGCAG	7852	chemokine (C-X-C motif) receptor 4 [Source:HGNC Symbol;Acc:2561]	3.99636	5.1171
ASHGA5P012965	0.0278927	0.076406	2.17397	down	protein_coding	ENST00000382058	CCDS46695.1	FBXO7	GENCODE	1758	chr22	+	32871223	32894818	GTCCCCTCCTCGATTCAGAGCATTCTTCACTCCAGAATAATGAGCAACCCTCTTTGGCCA	25793	F-box protein 7 [Source:HGNC Symbol;Acc:13586]	7.46976	8.59009
ASHGA5P002764	0.0309884	0.0807469	2.17271	down	protein_coding	NM_001114331	CCDS45378.1	CLCN7	RefSeq	4164	chr16	-	1494933	1525085	TGCGCGCCAGGATATGGACCCTCCACATCCCTTCCCCAAGGAGATCCCACACAACGAGAA	1186	H(+)/Cl(-) exchange transporter 7 isoform b	7.96854	9.08804
ASHGA5P053471	0.00584263	0.0298156	2.17261	down	protein_coding	ENST00000327835	CCDS34913.1	ZNF704	GENCODE	14386	chr8	-	81540685	81787016	ACCATTCCAGGATCGGCCAAGTTCACCCCCAATGGCAGCAGCTTCAGCATTTCCTGGCAA	619279	zinc finger protein 704 [Source:HGNC Symbol;Acc:32291]	5.67436	6.79379
ASHGA5P051856	0.0492699	0.104797	2.1706	down	protein_coding	ENST00000330198	CCDS3332.1	LMLN	GENCODE	7043	chr3	+	197687070	197770591	GCTGGAGCGGGTCTGTGTGGGTCCGAAGCGTTTTACTCCTGTTGGGCGGGCTCCGGGCCA	89782	leishmanolysin-like (metallopeptidase M8 family) [Source:HGNC Symbol;Acc:15991]	3.28905	4.40714
ASHGA5P026443	0.0155377	0.0539516	2.16954	down	protein_coding	ENST00000313253	CCDS31563.1	OR4D11	GENCODE	936	chr11	+	59271048	59271984	AGTTCTTGATGATTTCCAACAATGGCCTGGTCACTACCCTGTGGTTTATCTTCCTGCTTG	219986	"olfactory receptor, family 4, subfamily D, member 11 [Source:HGNC Symbol;Acc:15174]"	3.669	4.78639
ASHGA5P036360	0.0274446	0.0756723	2.16938	down	protein_coding	ENST00000286201	CCDS2351.1	FZD7	GENCODE	3851	chr2	+	202899309	202903160	GATTTTTGTTTTGTTGGCTTTAAAGGTCTACCCCACTTTATCACATGTACAGATCACAAA	8324	frizzled family receptor 7 [Source:HGNC Symbol;Acc:4045]	5.17659	6.29387
ASHGA5P007180	0.0418082	0.0954933	2.16938	down	protein_coding	ENST00000329125	CCDS54068.1	GP1BA	GENCODE	2501	chr17	+	4835591	4838325	AAGACGCTCTGTGCCTTCGGAGGTCTTTCTGCCTGCCTGTCCTCATGCCTCTCCTCCTCT	2811	"glycoprotein Ib (platelet), alpha polypeptide [Source:HGNC Symbol;Acc:4439]"	6.7618	7.87908
ASHGA5P006900	8.33827e-05	0.00258969	2.16911	down	protein_coding	NM_001039803	CCDS35060.1	CDK20	RefSeq	2406	chr9	-	90581358	90589695	TCGATCTGTGGTCTGTGGGCTGCATCATGGGGGAGCTGTTGAATGGGTCCCCCCTTTTCC	23552	cyclin-dependent kinase 20 isoform 3	6.64279	7.7599
ASHGA5P052092	0.0254594	0.0726689	2.16867	down	protein_coding	NM_173080	CCDS1031.1	SPRR4	RefSeq	766	chr1	+	152943127	152945069	AACAGAAGTAAGGATGGACTGGATATTACCATCATCCACCATCCTGGCTACCAGATGGAA	163778	small proline-rich protein 4	5.06656	6.18337
ASHGA5P056067	0.00179549	0.0153415	2.16866	down	protein_coding	NM_004350	CCDS257.1	RUNX3	RefSeq	4270	chr1	-	25226001	25256770	ATTCCCGTAGACCCAAGCACCAGCCGCCGCTTCACACCTCCCTCCCCGGCCTTCCCCTGC	864	runt-related transcription factor 3 isoform 2	10.5554	11.6723
ASHGA5P035324	0.00314479	0.0210624	2.1675	down	protein_coding	NM_144586	CCDS42759.1	LYPD1	RefSeq	2683	chr2	-	133402336	133428481	CCTCCTCTGATGCGCTTGCCCTCTCCCGGCCCCGGGACTCCGGGAGAATGTGGGTCCTAG	116372	ly6/PLAUR domain-containing protein 1 isoform a precursor	6.38645	7.50248
ASHGA5P008616	0.000734501	0.0093385	2.16727	down	protein_coding	NM_018287	CCDS7170.1	ARHGAP12	RefSeq	5105	chr10	-	32094325	32217804	CCTGAAAATGAGTCTTCTCCCTCCTCACCAAAGCACCAAGATACAGCCAGCAGTCCAAAG	94134	rho GTPase-activating protein 12 isoform 1	7.25671	8.37259
ASHGA5P038231	0.00675295	0.0323946	2.16525	down	protein_coding	NM_001190317	CCDS54581.1	IP6K2	RefSeq	2242	chr3	-	48730883	48754711	CATCTCACACCCTCAGTTTTCAATCCCTGGTAAGATTGCTCAATTCTGTTTTGTTGTGTG	51447	inositol hexakisphosphate kinase 2 isoform e	4.11732	5.23186
ASHGA5P008920	0.0046441	0.0265039	2.16219	down	protein_coding	NM_006903	CCDS3668.2	PPA2	RefSeq	1595	chr4	-	106290233	106395227	CCTCCCTCAGATTCTTTCTTGTGGAGAAGTTATTCATGTGAAGATCCTTGGAATTTTGGC	27068	"inorganic pyrophosphatase 2, mitochondrial isoform 2 precursor"	5.26651	6.37901
ASHGA5P013456	0.00106285	0.0112784	2.16074	down	protein_coding	NM_001161661	CCDS54945.1	WWC1	RefSeq	6753	chr5	+	167719064	167899308	CAGCGTCCGGATGAAGCGGCCGTCCCCACCCCCACAGCCTTCCTCGGTCAAGTCGCTGCG	23286	protein KIBRA isoform 1	9.67307	10.7846
ASHGA5P050341	0.000266115	0.00513638	2.16013	down	protein_coding	NM_152600	CCDS12927.1	ZNF579	RefSeq	2173	chr19	-	56088890	56092211	GGCCTCCTGACCTTCGCCGCCCTGCCCTCCGCCGCTCCGCCTGAGCTCCCCGGTTTGCAG	163033	zinc finger protein 579	11.3744	12.4855
ASHGA5P047472	0.00104379	0.0111754	2.16005	down	protein_coding	NM_018649	CCDS7296.1	H2AFY2	RefSeq	2181	chr10	+	71812356	71872040	CAAAAAGCGAGGGACCAAAGGCAAGTCGGAAACGATCCTCTCCCCACCCCCAGAGAAAAG	55506	core histone macro-H2A.2	9.502	10.6131
ASHGA5P054134	0.00804627	0.0358405	2.15791	down	protein_coding	NM_001017438	CCDS35407.1	CT45A6	RefSeq	1008	chrX	-	134963214	134971244	GGTGCTTCTGGTGAGACGTCTCCCCATGCACATCACTCCCAGATGCCCTAGGGGGCACAT	541465	cancer/testis antigen family 45 member A4/A6	6.77842	7.88806
ASHGA5P054932	0.00132607	0.0128777	2.15775	down	protein_coding	ENST00000433688		C11orf95	GENCODE	5582	chr11	-	63527363	63536113	GGGGCCGCCCCGCCCCGAGTCCCCCCAGGGCCCCATCCCCCCCGGCACTGCCGCAGCCTC		chromosome 11 open reading frame 95 [Source:HGNC Symbol;Acc:28449]	11.7029	12.8125
ASHGA5P045486	0.00120158	0.01221	2.15729	down	protein_coding	NM_001142533	CCDS48026.1	SH2D3C	RefSeq	2694	chr9	-	130500595	130517583	AGCCTGTGGAGTGCCCTGTCGGCCGCCGCCTGCTGCTTCTACCGCGGCTCCTTCGTGCAG	10044	SH2 domain-containing protein 3C isoform d	7.45647	8.56569
ASHGA5P046163	0.00137561	0.0130965	2.15683	down	protein_coding	NM_153477	CCDS14284.1	UXT	RefSeq	797	chrX	-	47511190	47518579	AGATGAACTGTGTGTGAGGCCAAACTGGATCGGTCAACATGGTCTTCCCCCTCCCCACTC	8409	protein UXT isoform 1	10.0083	11.1172
ASHGA5P008538	0.00699455	0.0329572	2.15582	down	protein_coding	NM_033164	CCDS7517.1	FGF8	RefSeq	1003	chr10	-	103529886	103535759	CTCCCAACAGCATGTGAGGGAGCAGAGCCTGGTGACGGATCAGCTCAGCCGCCGCCTCAT	2253	fibroblast growth factor 8 isoform E precursor	3.66422	4.77246
ASHGA5P002049	0.0213425	0.0655262	2.15334	down	protein_coding	NM_022719	CCDS13756.1	DGCR14	RefSeq	5405	chr22	-	19117791	19132190	ATTTGGATTTGTTGCCACTCCTTCCCCTGCCCCTGGTGTGAACGAGTCCCCGATGATGAC	8220	protein DGCR14	10.1435	11.2501
ASHGA5P021750	0.000693668	0.00904757	2.15266	down	protein_coding	ENST00000539851	CCDS53657.1	GPR137	GENCODE	1843	chr11	+	64052282	64056972	TGGAGATAAGGCCTCCCTCCCTGACATGGAGAGTAACCTGTCTGGCCTGGTGCCTGCTGC	56834	G protein-coupled receptor 137 [Source:HGNC Symbol;Acc:24300]	8.10391	9.21003
ASHGA5P011384	0.02618	0.0737953	2.1516	down	protein_coding	NM_014495	CCDS622.1	ANGPTL3	RefSeq	2126	chr1	+	63063186	63071180	GGTTATTCAGGAGGCTGGTGGTGGCATGATGAGTGTGGAGAAAACAACCTAAATGGTAAA	27329	angiopoietin-related protein 3 precursor	3.20089	4.3063
ASHGA5P048194	0.0432037	0.0973708	2.15002	down	protein_coding	ENST00000301894	CCDS8078.1	NRXN2	GENCODE	3535	chr11	-	64373645	64410787	CGAGGGGGCCCGGGTCTCCTCCAGCCTCAGCACCACCCACCACGTCCACCACTTCCACAG	9379	neurexin 2 [Source:HGNC Symbol;Acc:8009]	7.29815	8.4025
ASHGA5P017834	6.2348e-06	0.00056207	2.14884	down	protein_coding	NM_001080429	CCDS45947.1	CAMSAP3	RefSeq	4201	chr19	+	7660787	7683196	AAGCTGGTTCCTCACGCAATTGCCTTCTGTTTGAAGGAGTCGGGGAGCAAACCCCCCATG	57662	calmodulin-regulated spectrin-associated protein 3 isoform 1	7.2286	8.33216
ASHGA5P051336	0.0175627	0.0581635	2.14813	down	protein_coding	NM_003932	CCDS14006.1	ST13	RefSeq	3214	chr22	-	41220600	41252687	CCGCCCCCTTCTGCGCGGTCACGCCGAGCCAGCGCCTGGGCCTGGAACCGGGCCGTAGCC	6767	hsc70-interacting protein	6.75999	7.86307
ASHGA5P052673	0.0259199	0.0734073	2.14704	down	protein_coding	NM_022110	CCDS4738.1	FKBPL	RefSeq	1357	chr6	-	32096483	32098067	GGGCTGGCTCAGGGTCTGCGCAAGATGTTTGGCTGATTAAAAGTTAAACCTTAAAAGAGA	63943	FK506-binding protein-like	5.80243	6.90478
ASHGA5P015715	0.00231399	0.0177082	2.1462	down	protein_coding	NM_001098514	CCDS45404.2	C16orf89	RefSeq	1575	chr16	-	5094122	5116146	GAAAAACAATTTCCAGATGGCTGCTCCTCCCACAACACAGCCACAGCAGTGGCAGCCCTG	146556	UPF0764 protein C16orf89 isoform 2 precursor	4.8062	5.90798
ASHGA5P033764	0.0252235	0.0723605	2.14458	down	protein_coding	ENST00000324750	CCDS11868.1	MC5R	GENCODE	1319	chr18	+	13825542	13826861	TAAGCACAAAGTGCTCCTCTCTGTGGCTCTGTTCTCCTTTGTTTGCTCACCTATGACAAA	4161	melanocortin 5 receptor [Source:HGNC Symbol;Acc:6933]	5.76635	6.86704
ASHGA5P005109	0.000328117	0.00588434	2.14341	down	protein_coding	NM_145068	CCDS11029.1	TRPV3	RefSeq	6130	chr17	-	3413795	3461289	TCACCCCCACAAAGAAGAGTGCACACTTCTTCCTGGAGATAGAAGGGTTTGAACCCAACC	162514	transient receptor potential cation channel subfamily V member 3 isoform 2	4.50696	5.60687
ASHGA5P010068	0.00029763	0.00549267	2.1424	down	protein_coding	NM_139017	CCDS3970.2	IL31RA	RefSeq	2704	chr5	+	55147206	55213165	GCAAAACATTCTCTCTCCCCAGCCTTCATGTGTTAACCTGGGGATGATGTGGACCTGGGC	133396	interleukin-31 receptor subunit alpha isoform 1	5.49231	6.59154
ASHGA5P055385	0.0214239	0.0656376	2.13908	down	protein_coding	NM_002631	CCDS113.1	PGD	RefSeq	1937	chr1	+	10459084	10480201	TCTTTCCCTCACTCGTCCTCCGCGCGTCGCCGCTCTTCGGTTCTGCTCTGTCCGCCGCCA	5226	"6-phosphogluconate dehydrogenase, decarboxylating"	6.49193	7.58892
ASHGA5P051538	0.00108701	0.0114395	2.13831	down	protein_coding	NM_170714	CCDS2820.1	RASSF1	RefSeq	1979	chr3	-	50367216	50378367	CTCTCTGCAGATTGCAAGTTCACCTGCCACTACCGCTGCCGCGCGCTCGTCTGCCTGGAC	11186	ras association domain-containing protein 1 isoform D	4.42239	5.51886
ASHGA5P033370	0.00265507	0.0190742	2.13739	down	protein_coding	NM_001015002	CCDS45776.1	LLGL2	RefSeq	1440	chr17	+	73521782	73560804	TTCGGGAGTGGGTGCCCAGGGTTAGGTGTGGGAGGCATGGGGCAGGACCATCAGTAAAGA	3993	lethal(2) giant larvae protein homolog 2 isoform b	4.25516	5.351
ASHGA5P049320	0.0074998	0.0343991	2.13552	down	protein_coding	NM_001906	CCDS32490.1	CTRB1	RefSeq	873	chr16	+	75252883	75258822	ACCTTCTGAGGCAGCGGCATGGCTTCCCTCTGGCTCCTCTCCTGCTTCTCCCTTGTGGGG	1504	chymotrypsinogen B precursor	7.60934	8.70393
ASHGA5P054241	0.0373829	0.0895761	2.13266	down	protein_coding	NM_005525	CCDS1489.1	HSD11B1	RefSeq	1477	chr1	+	209878135	209908295	AGCTCTGTAGGTTCTCTCTGTGTGTCCTACAGGAGTCTTCAGGCCAGCTCCCTGTCGGAT	3290	corticosteroid 11-beta-dehydrogenase isozyme 1	4.06679	5.15944
ASHGA5P018255	0.0196867	0.062147	2.13238	down	protein_coding	NM_001136036	CCDS44348.1	ZNF692	RefSeq	2208	chr1	-	249144202	249153125	TGCTTCTGTCTGCCTGCCTCCCACCCGACGACACTCACATGCCTCTGGTGCACATGGCTT	55657	zinc finger protein 692 isoform 1	8.88872	9.98118
ASHGA5P013810	0.0110807	0.0438584	2.12997	down	protein_coding	NM_024085	CCDS42820.1	ATG9A	RefSeq	3743	chr2	-	220084101	220094361	TGTTCCTGAGGTGGTCAAGGTGGACAGGGGGCGGTGGTGATGGCGCAGTTTGACACTGAA	79065	autophagy-related protein 9A	3.71332	4.80416
ASHGA5P049553	4.06407e-05	0.00174686	2.12928	down	protein_coding	NM_001037330	CCDS32588.1	TRIM16L	RefSeq	1982	chr17	+	18625401	18639431	TGAGATCAGCCACAGAAGTTAAACTTCTTTCCAGGGAAGAAGGGCGGGGATGTCAGGGCT	147166	tripartite motif-containing protein 16-like protein	3.2184	4.30876
ASHGA5P015560	0.00134279	0.0129175	2.12773	down	protein_coding	NM_001102599		CEACAM20	RefSeq	1530	chr19	-	45010210	45033548	ACCATCAACTGTCCCCAGTCCTCCTCCCTGTCCTCAGGGGCCATCGCTGGTATTGTCATC	125931	carcinoembryonic antigen-related cell adhesion molecule 20 isoform 4L precursor	8.39123	9.48054
ASHGA5P041624	0.0141547	0.0511144	2.12697	down	protein_coding	NM_148959	CCDS4470.1	HUS1B	RefSeq	1026	chr6	-	655938	656964	GCAGGGCGTATATTTTGTTGAGCCCTTCCTCCTTTGCAAAATTTATATTAAAGCATTGGT	135458	checkpoint protein HUS1B	5.84572	6.93452
ASHGA5P044037	0.00696821	0.0329045	2.12136	down	protein_coding	ENST00000297375	CCDS5940.1	EN2	GENCODE	3395	chr7	+	155250823	155257526	AGAACCAGTGTGGGATTTACTGTGAACAGCATGGAGGAGAATGACCCCAAGCCTGGCGAA	2020	engrailed homeobox 2 [Source:HGNC Symbol;Acc:3343]	3.37528	4.46027
ASHGA5P053047	0.04312	0.0972898	2.12045	down	protein_coding	NM_001077480	CCDS41430.1	NR1I3	RefSeq	1399	chr1	-	161199455	161208000	TCTCCCACAGTGGGGTTCCAGGTAGAGTTTTTGGAGTTGCTCTTTCACTTCCATGGAACA	9970	nuclear receptor subfamily 1 group I member 3 isoform 2	4.31333	5.3977
ASHGA5P049043	0.0107139	0.042902	2.11872	down	protein_coding	ENST00000304735	CCDS10514.1	VASN	GENCODE	2806	chr16	+	4421848	4433529	TCCAGTCACCCCTCCACGCAAAGCCCTACATCTAAGCCAGAGAGAGACAGGGCAGCTGGG	114990	vasorin [Source:HGNC Symbol;Acc:18517]	7.43061	8.5138
ASHGA5P002518	0.00314847	0.0210686	2.11772	down	protein_coding	NM_001128629	CCDS10054.1	PAK6	RefSeq	3856	chr15	+	40509628	40569688	TGCCACTGAGGTGGATATCTGGTCTCTGGGCATCATGGTGATTGAGATGGTAGATGGGGA	56924	serine/threonine-protein kinase PAK 6	3.11049	4.19301
ASHGA5P035043	0.00245858	0.0181885	2.11754	down	protein_coding	NM_198389	CCDS41266.1	PDPN	RefSeq	2822	chr1	+	13910251	13944452	CGACCCCGCTCCCCCGCCTCCTCGGGAGAGATAAATGCTGACTCCGCTCGGAAAGTTCTC	10630	podoplanin isoform b	10.3476	11.43
ASHGA5P009110	0.00523439	0.028333	2.11606	down	protein_coding	NM_133168	CCDS12874.1	OSCAR	RefSeq	1385	chr19	-	54597932	54604148	CTGACCCTCTTCCCCCCAGCTTCATACCACCCTAAGCCATGGCTGGGAGCTCAGCCGGCT	126014	osteoclast-associated immunoglobulin-like receptor isoform 5 precursor	9.86857	10.95
ASHGA5P055762	0.00106695	0.0113101	2.11574	down	protein_coding	NM_003689	CCDS194.1	AKR7A2	RefSeq	2619	chr1	-	19629201	19638640	CGCGTCTCGCGTAGTCTCCCGCGCCGCCGTCCACTGCGCGCTTCGCTCTCCGCCGCCCGA	8574	aflatoxin B1 aldehyde reductase member 2	7.06484	8.146
ASHGA5P012704	0.009231	0.0391513	2.11382	down	protein_coding	NM_000459	CCDS6519.1	TEK	RefSeq	4817	chr9	+	27109146	27230172	GAGAGAGAAGGCATACAGAGGATGACCCCAAAGATAGTGGATTTGCCAGATCATATAGAA	7010	angiopoietin-1 receptor precursor	3.6621	4.74196
ASHGA5P027815	0.00425938	0.02533	2.11292	down	protein_coding	NM_006113	CCDS785.1	VAV3	RefSeq	4776	chr1	-	108113781	108507545	TTAACAACCTCCGGGCGCACTCCATCAACCTGAAGGAGATCAACCTGAGGCCGCAGATGT	10451	guanine nucleotide exchange factor VAV3 isoform 1	3.8212	4.90044
ASHGA5P008695	0.00147222	0.0136341	2.10811	down	protein_coding	NM_001081443	CCDS42611.1	LILRB5	RefSeq	1982	chr19	-	54754269	54761167	GTGGCGACAGGCGTGTCTAGGAAGCCCTCCCTCCTGATCCCGCAGGGCTCTGTCGTGGCC	10990	leukocyte immunoglobulin-like receptor subfamily B member 5 isoform 3 precursor	8.13438	9.21033
ASHGA5P032823	0.0279088	0.076406	2.10762	down	protein_coding	NM_001141	CCDS11128.1	ALOX15B	RefSeq	2730	chr17	+	7942357	7952451	ATACACCCTGCACATCAACACACTCGCCCGGGAGCTGCTTATCGTGCCAGGGCAGGTGGT	247	arachidonate 15-lipoxygenase B isoform d	4.39409	5.4697
ASHGA5P021623	0.000434088	0.00701854	2.10689	down	protein_coding	NM_001190411	CCDS10994.1	RPH3AL	RefSeq	2578	chr17	-	62179	202633	TCTGTTCCCGATGTGACTCCCCACCCCCAGCCGGGTGCTCCGAGCCATGGCCGACACCAT	9501	rab effector Noc2 isoform 1	9.2035	10.2786
ASHGA5P038274	0.00156943	0.0142022	2.10667	down	protein_coding	NM_003392	CCDS46850.1	WNT5A	RefSeq	6194	chr3	-	55499742	55521670	TCGGCTGCGCTCGCTCGGGTGGCGACTTCCTCCCCGCGCCCCCTCCCCCTCGCCATGAAG	7474	protein Wnt-5a isoform 1	11.8397	12.9147
ASHGA5P046812	0.00755976	0.0344979	2.10655	down	protein_coding	ENST00000457222	CCDS48204.1	TSPY3	GENCODE	1161	chrY	+	9236029	9238826	AGTGAGCAGGCGGCTTTGGGGGAGGAGGCGGTGCTGCTGTTGGATGACATAATGGCGGAG	728137	"testis specific protein, Y-linked 3 [Source:HGNC Symbol;Acc:33876]"	4.12967	5.20455
ASHGA5P050260	0.00501632	0.0277122	2.10539	down	protein_coding	NM_004605	CCDS12724.1	SULT2B1	RefSeq	1281	chr19	+	49078992	49102684	ATGGCGTCTCCCCCACCTTTCCACAGCCAGAAGTTGCCAGGTGAATACTTCCGGTACAAG	6820	sulfotransferase family cytosolic 2B member 1 isoform a	8.12819	9.20228
ASHGA5P050064	0.0163266	0.0556622	2.10506	down	protein_coding	ENST00000245912	CCDS12171.1	TNFSF14	GENCODE	2894	chr19	-	6663147	6670599	TGTGGCCCGGGTGGGTCTGGGTCTCTTGCTGTTGCTGATGGGGGCCGGGCTGGCCGTCCA	8740	"tumor necrosis factor (ligand) superfamily, member 14 [Source:HGNC Symbol;Acc:11930]"	5.40462	6.47848
ASHGA5P055232	0.00755779	0.0344979	2.1042	down	protein_coding	NM_016522	CCDS8491.1	NTM	RefSeq	3381	chr11	+	131780711	132206716	GGGCGTGTGCCGTGCGGCTGCCGGAGTTCGGGGAAGTTGTGGCTGTCGAGAATGGGGGTC	50863	neurotrimin isoform 1 precursor	6.93591	8.00919
ASHGA5P009244	0.00647285	0.0316602	2.10326	down	protein_coding	NM_006732	CCDS12664.1	FOSB	RefSeq	3776	chr19	+	45971252	45978437	AGAGGAGACGCTCACCCCAGAGGAAGAGGAGAAGCGAAGGGTGCGCCGGGAACGAAATAA	2354	protein fosB isoform 1	3.4678	4.54043
ASHGA5P041816	0.00195917	0.0161212	2.09968	down	protein_coding	NM_001135105	CCDS47421.1	KCNK16	RefSeq	1412	chr6	-	39282473	39290330	TTTGCCTCTCCCATCATCCAACAGCAAGTGGGCTCCTATGTGGCTGGGTTCCTCTGCACA	83795	potassium channel subfamily K member 16 isoform 1	5.70671	6.77688
ASHGA5P011310	0.00424957	0.0252913	2.0989	down	protein_coding	NM_001134670	CCDS44469.1	HOGA1	RefSeq	2012	chr10	+	99344101	99372555	AAACTGGAGGAGAATCTGCACAAACTGGGCACCTTCCCCTTCCGAGGAGCTGTGGGGGGC	112817	"probable 4-hydroxy-2-oxoglutarate aldolase, mitochondrial isoform 2"	8.16138	9.23101
ASHGA5P051097	0.0467749	0.10175	2.09804	down	protein_coding	NM_181605		KRTAP6-3	RefSeq	616	chr21	+	31964758	31965374	CTGTGGCTATGGCTGTGGCTATGGCTATGTCTCCCACTCCTTCTGTGGCTGTGGCTATAG	337968	keratin-associated protein 6-3	5.21648	6.28552
ASHGA5P006826	0.005341	0.0285311	2.09636	down	protein_coding	NM_003052	CCDS4418.1	SLC34A1	RefSeq	2608	chr5	+	176811431	176825849	CGCTTTCCAGATTGCCCTCTGTCACTTCTTCTTCAACATCTCGGGTATCCTTCTGTGGTA	6569	sodium-dependent phosphate transport protein 2A isoform 1	5.21702	6.28491
ASHGA5P007609	0.00427639	0.0254163	2.09579	down	protein_coding	NM_182557	CCDS8403.1	BCL9L	RefSeq	7740	chr11	-	118766850	118781613	ATCCTGGCTAACAAGACAAGGTTACCCCACCCCAGGAGGAGAGAAGCTCCAGGGAGCCCG	283149	B-cell CLL/lymphoma 9-like protein	7.25943	8.32692
ASHGA5P054700	0.0421194	0.0959031	2.09513	down	protein_coding	NM_031946	CCDS43681.1	AGAP3	RefSeq	3247	chr7	+	150783825	150841523	CCAGCGCCGACCAGTGGAGTGAGGCCACCACTTCCCTGCCCCCAGGCATGCAGCACCCTG	116988	"arf-GAP with GTPase, ANK repeat and PH domain-containing protein 3 isoform a"	7.12262	8.18966
ASHGA5P053232	4.96392e-05	0.00195998	2.09408	down	protein_coding	NM_001128852	CCDS47666.1	SRRT	RefSeq	3029	chr7	+	100472700	100486285	AGAATGACAGTTCTAATGATGACAAAACAAAGAAGTCGGAGGGTGATGGGGACAAGGAAG	51593	serrate RNA effector molecule homolog isoform c	3.96075	5.02706
ASHGA5P053862	0.0328642	0.0835757	2.08879	down	protein_coding	NM_020064	CCDS6950.1	BARHL1	RefSeq	1907	chr9	+	135457992	135465640	GGTGGGTGGGGAGCTTTTGGGGAGGACAGGTCGCAGCTTGGCTATGGAAGGCTCCAATGG	56751	barH-like 1 homeobox protein	4.06451	5.12718
ASHGA5P054016	0.00714813	0.0334198	2.08787	down	protein_coding	NM_001184830	CCDS55435.1	VSIG4	RefSeq	2209	chrX	-	65241579	65259967	AAGCAGCCAGGTAAGAAAGTCTCTCCTCTTCCATTTTTGACCCCGTCCCTGCCCTCAATT	11326	V-set and immunoglobulin domain-containing protein 4 isoform 4 precursor	6.78472	7.84675
ASHGA5P008700	0.0279656	0.0765	2.0878	down	protein_coding	NM_133271	CCDS12908.1	FCAR	RefSeq	1383	chr19	+	55385548	55401839	GTAGTGACAGACTCCATCCACCAAGATTACACGACGCAGAACTTGATCCGCATGGCCGTG	2204	immunoglobulin alpha Fc receptor isoform c precursor	5.11979	6.18178
ASHGA5P055384	0.0154263	0.0537441	2.08773	down	protein_coding	NM_018113	CCDS8780.2	LMBR1L	RefSeq	2358	chr12	-	49490922	49504680	CCAGGTCTCCTTCTCCAAGCTGGGCTCCTTTGGTGCCGTCATTCAGGTTGTACTCATCTT	55716	protein LMBR1L	5.46629	6.52823
ASHGA5P046586	0.0119691	0.0460999	2.08662	down	protein_coding	NM_006517	CCDS14426.1	SLC16A2	RefSeq	4141	chrX	+	73641327	73753764	ATCTTCTTCTGTTCTCCCATTGTGAGTATATTCACTGACCGTTTGGGCTGCCGAATCACA	6567	monocarboxylate transporter 8	4.21645	5.27762
ASHGA5P014144	4.55422e-05	0.00184836	2.08573	down	protein_coding	NM_001191321	CCDS53921.1	GABRB3	RefSeq	5543	chr15	-	26788693	26874237	GGCCACCTACCAGACAGAAGAGGATTATACCTTAACCATGTATTTTCAACAATATTGGAG	2562	gamma-aminobutyric acid receptor subunit beta-3 isoform 4	3.73199	4.79254
ASHGA5P006197	0.00746842	0.0342861	2.07706	down	protein_coding	NM_130802	CCDS8083.1	MEN1	RefSeq	3172	chr11	-	64570985	64578213	GGGGAAGCCGGCCGCCGCCCACCGCCCGCCGCCATGGGGCTGAAGGCCGCCCAGAAGACG	4221	menin isoform 1	9.66368	10.7182
ASHGA5P048539	0.00266878	0.0191457	2.07299	down	protein_coding	NM_032714	CCDS41999.1	INF2	RefSeq	1719	chr14	+	105155942	105171145	CTCGCCTGCGGTGAGTCCCCACTGTAGCGGTCCTGCCGGCTCCCCCTCCTGCTCCCAAGG	64423	inverted formin-2 isoform 3	9.20162	10.2533
ASHGA5P010023	0.0086759	0.0375942	2.07087	down	protein_coding	NM_172081	CCDS5486.1	CAMK2B	RefSeq	4097	chr7	-	44256748	44365230	CTGCCGCCCTGGAGTCTTCTGACAGTGCCAATACCACCATAGAGGATGAAGACGCTAAAG	816	calcium/calmodulin-dependent protein kinase type II subunit beta isoform 5	4.78753	5.83776
ASHGA5P004875	0.00535732	0.0285733	2.07055	down	protein_coding	NM_153022	CCDS8619.1	C12orf59	RefSeq	2800	chr12	+	10331556	10344403	GCCCTGCTGTATTTCATCCTGTTGCCTGACCACAGACTGGGTACATCTCTGGTATATATG	120939	uncharacterized protein C12orf59	4.51813	5.56814
ASHGA5P011712	0.00575906	0.0296184	2.07047	down	protein_coding	NM_004828	CCDS4855.1	NCR2	RefSeq	941	chr6	+	41303527	41318625	TGCTCGTCTGGTGGGGGGACATATGGTGGAAAACCATGATGGAGCTCAGGAGCCTGGATA	9436	natural cytotoxicity triggering receptor 2 isoform 1 precursor	4.06414	5.11409
ASHGA5P040269	0.0238779	0.0702004	2.07017	down	protein_coding	NM_000892	CCDS34120.1	KLKB1	RefSeq	2252	chr4	+	187148671	187179625	TAAAATAACCCAACGGATGGTCTGTGCTGGCTATAAAGAAGGGGGAAAAGATGCTTGTAA	3818	plasma kallikrein preproprotein	5.44944	6.49918
ASHGA5P032353	0.0257801	0.0731381	2.068	down	protein_coding	NM_152781	CCDS11299.1	C17orf66	RefSeq	1969	chr17	-	34181959	34195895	ATGTTCCATCTCCCAATGAGCAAGCTGACTATAAAATCTGAGATGCGATCCAGGCCCTTA	256957	uncharacterized protein C17orf66	5.65425	6.70249
ASHGA5P035393	5.12677e-05	0.00198536	2.06775	down	protein_coding	NM_006922	CCDS33312.1	SCN3A	RefSeq	9141	chr2	-	165944029	166060577	GTTTCCTTGGTGGGTGGACCTTCAGCTCTAACGTCACCTACTGGACAACTTCCCCCAGAG	6328	sodium channel protein type 3 subunit alpha isoform 1	4.66127	5.70933
ASHGA5P037440	0.000204328	0.00438208	2.06482	down	protein_coding	NM_181616	CCDS13604.1	KRTAP20-2	RefSeq	198	chr21	+	32007582	32007780	GGATATGGCTGCTGCCGCCCATCTTGCTATGGAAGATACTGGTCCTGTGGCTTCTACTGA	337976	keratin-associated protein 20-2	4.63382	5.67983
ASHGA5P004117	0.00363879	0.0229525	2.06305	down	protein_coding	NM_133169	CCDS12875.1	OSCAR	RefSeq	1420	chr19	-	54597932	54604148	GACATCACTCCGTCTGTCCCCCCAGCTTCATACCACCCTAAGCCATGGCTGGGAGCTCAG	126014	osteoclast-associated immunoglobulin-like receptor isoform 4 precursor	8.75333	9.79811
ASHGA5P013959	0.0209507	0.0647069	2.06192	down	protein_coding	NM_001638	CCDS44923.1	APOF	RefSeq	1720	chr12	-	56754354	56756583	GGACTGTGTGGGTACTCTGCTCCAGACATGCGTGGCCTCAGACTCATCATGATACCAGTT	319	apolipoprotein F precursor	6.13223	7.17622
ASHGA5P043670	0.00460066	0.0264039	2.05982	down	protein_coding	NM_182595	CCDS43584.1	POM121L12	RefSeq	1284	chr7	+	53103348	53104618	GCTTGCTTTTTCTCCATGTCTCCCAGTTTGTATAGTTAAATTGTCCAGTTGTATAGTTAA	285877	POM121-like protein 12	4.23266	5.27518
ASHGA5P004394	0.0468657	0.101906	2.05803	down	protein_coding	NM_002606	CCDS13690.1	PDE9A	RefSeq	2103	chr21	+	44073861	44195618	GCCTGCCTCGGAACACGACCATCTCCCTGCTGACCACCGACGACGCCATGGTCTCCATCG	5152	"high affinity cGMP-specific 3',5'-cyclic phosphodiesterase 9A isoform a"	7.68367	8.72494
ASHGA5P052441	0.00786156	0.0353884	2.0576	down	protein_coding	ENST00000435817	CCDS47295.1	FCHSD1	GENCODE	4320	chr5	-	141018868	141030986	TTCCGGAGTCCAGTGGCTGACCGCCTTGCTGGAGCGGAGATGCAGCCGCCGCCCCGAAAA	89848	FCH and double SH3 domains 1 [Source:HGNC Symbol;Acc:25463]	5.24201	6.28298
ASHGA5P005455	0.006479	0.0316706	2.0554	down	protein_coding	ENST00000306030	CCDS45416.1	SNX29	GENCODE	7002	chr16	+	12146054	12668145	CCTTCTTCGTCGACATCACCCCGCCCGGAGAGCCTGTGAACAGCCGGCCCAAAGCAGCTT	92017	sorting nexin 29 [Source:HGNC Symbol;Acc:30542]	6.71039	7.74981
ASHGA5P001910	0.00170604	0.0148796	2.05524	down	protein_coding	NM_022044	CCDS13792.1	SDF2L1	RefSeq	876	chr22	+	21996541	21998588	AACCTGCACACGCACCACTTCCCGTCGCCGCTGTCCAACAACCAGGAGGTGAGTGCCTTT	23753	stromal cell-derived factor 2-like protein 1 precursor	7.702	8.74131
ASHGA5P012859	0.00116898	0.0119923	2.05521	down	protein_coding	NM_001177675	CCDS54537.1	PNPLA5	RefSeq	2208	chr22	-	44275557	44287893	AAGTCGGTCGACTGCCCCTCCACCATCACGGTGTCGCCCTTCCATGGGACAGTGGACATC	150379	patatin-like phospholipase domain-containing protein 5 isoform 2	6.82391	7.86319
ASHGA5P010313	0.00465768	0.0265368	2.05492	down	protein_coding	NM_207191	CCDS1088.1	ADAM15	RefSeq	2782	chr1	+	155023747	155035252	GCCAGTACAGTCTCAGGGGCCAGCCAAGCCCCCACCCCCAAGGAAGCCACTGCCTGCCGA	8751	disintegrin and metalloproteinase domain-containing protein 15 isoform 1 preproprotein	9.98529	11.0244
ASHGA5P033099	0.00636875	0.0314181	2.05246	down	protein_coding	NM_001146041	CCDS54124.1	KRTAP4-9	RefSeq	1100	chr17	+	39261640	39262740	GCCGCCCAGTTATATTCTGTGTTTCTCCTAGTGTGAATTTCTTATGCTTTGTTGCATCTC	100132386	keratin-associated protein 4-9	5.46632	6.50368
ASHGA5P049590	0.00848799	0.0370945	2.05024	down	protein_coding	NM_054035	CCDS11234.1	UNC119	RefSeq	1665	chr17	-	26873724	26879646	TGGGGAAGTGGGGGCGTCTAGAGACTGAGCTGCGGGAGGGAGAGGGACTTGTGGGTCTGA	9094	protein unc-119 homolog A isoform b	4.33124	5.36703
ASHGA5P054333	0.0305057	0.0798256	2.04865	down	protein_coding	NM_017634	CCDS6048.1	KCTD9	RefSeq	3417	chr8	-	25285363	25315984	GTGGGAGGGTGGCGGCTCACTCAGGACCCAGCGGGGGCAGCGCGATGAGGCGGGTGACCC	54793	BTB/POZ domain-containing protein KCTD9	4.80534	5.84001
ASHGA5P011394	0.00135008	0.0129373	2.04856	down	protein_coding	NM_001114094	CCDS44464.1	BLNK	RefSeq	1760	chr10	-	97951454	98031333	AACTATATTCATCCCACAGAAAGCAGTTCACCTCCACCTGAAAAAGGTCGAAACAGTGGG	29760	B-cell linker protein isoform 2	3.85383	4.88844
ASHGA5P047668	0.0332754	0.0840715	2.04766	down	protein_coding	NM_001083913	CCDS44473.1	WBP1L	RefSeq	4123	chr10	+	104503726	104576021	GCGCTCCTGCTCCTCCAGGCGCTGCCCAGCCCCTTGTCAGCCAGGGCTGAACCCCCGCAG	54838	WW domain binding protein 1-like isoform 1 precursor	10.9028	11.9368
ASHGA5P053972	0.00385745	0.0236934	2.04479	down	protein_coding	ENST00000272198	CCDS44296.1	PPFIA4	GENCODE	5045	chr1	+	203020310	203047864	TTTCTCTCCCCCATCACCGCTCAAGGTCGCACATGGGCAGTGCAGCAGACGTGCGGTTCT	8497	"protein tyrosine phosphatase, receptor type, f polypeptide (PTPRF), interacting protein (liprin), alpha 4 [Source:HGNC Symbol;Acc:9248]"	7.36227	8.39422
ASHGA5P053980	0.0175262	0.0580806	2.04128	down	protein_coding	NM_033626	CCDS14316.1	CCDC120	RefSeq	4004	chrX	+	48916515	48927510	CTGTCTCTGGCAGGTATGGGGGGTGCTTTTACTGATGGGTAGGGGTCTCGTAAGGCAGAT	90060	coiled-coil domain-containing protein 120 isoform 3	5.15359	6.18307
ASHGA5P004839	0.00173969	0.0149951	2.04087	down	protein_coding	NM_182765	CCDS7414.1	HECTD2	RefSeq	4826	chr10	+	93170095	93274520	AAACTCTCACAGGTTTTCCTTCTGTCAGTACCCATTCGTTATTTCTGTAGCTGCAAAAAA	143279	probable E3 ubiquitin-protein ligase HECTD2 isoform a	3.16776	4.19695
ASHGA5P055427	0.00387418	0.0237606	2.03985	down	protein_coding	NM_015319	CCDS8842.1	TENC1	RefSeq	4952	chr12	+	53442732	53458162	CCTCCTGTCCAGTCCTCAGGCCCTGGGACAGCTGCTGAGGAAGGAGAGCAGACCCAGGAG	23371	tensin-like C1 domain-containing phosphatase isoform 1	3.21063	4.23909
ASHGA5P005886	0.00283253	0.019818	2.03815	down	protein_coding	NM_014316	CCDS10537.1	CARHSP1	RefSeq	2727	chr16	-	8946801	8962863	GGATTGCAGGGTCAGCCATGTCATCTGAGCCTCCCCCACCACCACAGCCCCCCACCCATC	23589	calcium-regulated heat stable protein 1	11.8572	12.8845
ASHGA5P008950	0.00038511	0.00649459	2.03526	down	protein_coding	NM_004769	CCDS5916.1	ASIC3	RefSeq	2294	chr7	+	150745378	150749843	TGGGCCCCAGACCTCCCACCCCTCCCTGTGCCGTCACCAAGACTCTCTCCGCCTCCCACC	9311	acid-sensing ion channel 3 isoform a	12.363	13.3882
ASHGA5P054675	0.031618	0.0817908	2.03417	down	protein_coding	NM_001039165	CCDS41603.1	MRGPRE	RefSeq	1296	chr11	-	3249040	3253616	CCGCCCCATGATGGAGCCCAGAGAAGCTGGACAGCACGTGGGGGCCGCCAACGGCGCCCA	116534	mas-related G-protein coupled receptor member E	3.87315	4.89759
ASHGA5P014146	0.00688688	0.0327418	2.03308	down	protein_coding	NM_177560	CCDS13004.1	CSNK2A1	RefSeq	2522	chr20	-	463337	524482	TGAGCAGAGGGGAGAGCGGCCGCCGCCGCTGCCGCTTCCACCACAGAAATCAAGATGACT	1457	casein kinase II subunit alpha isoform b	7.90731	8.93097
ASHGA5P005703	0.0433069	0.0974094	2.03285	down	protein_coding	ENST00000308919	CCDS5319.2	CYP2W1	GENCODE	2304	chr7	+	1022834	1029276	TTCTCTGCAGGCCGCCGCGTCTGTGTTGGGGAGCGCCTGGCCAGGACCGAGCTCTTCCTG	54905	"cytochrome P450, family 2, subfamily W, polypeptide 1 [Source:HGNC Symbol;Acc:20243]"	3.97153	4.99504
ASHGA5P004270	0.0284378	0.0771376	2.03135	down	protein_coding	ENST00000288709	CCDS30569.2	MMEL1	GENCODE	2902	chr1	-	2522080	2564481	GTGAGCAAAGGTTCCTCCGCGGTGCTCTCCCGTCCAGAGCCCTGCTGATGGGGAAGTCCG	79258	membrane metallo-endopeptidase-like 1 [Source:HGNC Symbol;Acc:14668]	5.86362	6.88606
ASHGA5P020659	0.00158585	0.0143092	2.02732	down	protein_coding	ENST00000518069	CCDS54925.1	PCDHGA5	GENCODE	4602	chr5	+	140743897	140892546	AAACAAAGAAGAACGGCGAGTTCAGCAAGCCCCGCCCAACACGGACTGGCGTTTCTCTCA	56110	"protocadherin gamma subfamily A, 5 [Source:HGNC Symbol;Acc:8703]"	5.72529	6.74486
ASHGA5P051256	0.00623474	0.0309821	2.02597	down	protein_coding	NM_198440	CCDS42986.1	DERL3	RefSeq	3216	chr22	-	24176689	24181199	CTGGCTTCCTGTGAGTGTTGAGAGCCCTCCCTCCCTCTCCCCACCCTCAGAAGGATCCCC	91319	derlin-3 isoform 3	12.3835	13.4021
ASHGA5P005011	0.000541476	0.00801751	2.02596	down	protein_coding	ENST00000300119	CCDS8929.1	MYO1A	GENCODE	3621	chr12	-	57422300	57443901	TCCTCCCGATTTGGAAAATACATGGATATTGAATTTGACTTCAAGGGATCCCCCCTCGGT	4640	myosin IA [Source:HGNC Symbol;Acc:7595]	5.82868	6.84729
ASHGA5P034070	0.00566303	0.0293883	2.02517	down	protein_coding	NM_002730	CCDS12304.1	PRKACA	RefSeq	2689	chr19	-	14202506	14228559	CCGCCGCCGCCGCGATGGGCAACGCCGCCGCCGCCAAGAAGGGCAGCGAGCAGGAGAGCG	5566	cAMP-dependent protein kinase catalytic subunit alpha isoform 1	11.3717	12.3897
ASHGA5P012376	0.0178808	0.0587787	2.02506	down	protein_coding	NM_001135113	CCDS46121.1	IGFL2	RefSeq	618	chr19	+	46651499	46664561	AGAATCTTCGCTCCTGCTTATGTGTCAGTCTGTCTCCTCCTCTTGTGTCCAAGGGAAGTC	147920	insulin growth factor-like family member 2 isoform b precursor	5.98024	6.9982
ASHGA5P008617	0.00997845	0.0409392	2.02271	down	protein_coding	NM_001171087	CCDS54691.1	CLCN2	RefSeq	3248	chr3	-	184063972	184079439	TTTGTCATTGATGGAATTCATACGGACAGCAGCACCTACCGGATTGTGCCTGGGGGCTAC	1181	chloride channel protein 2 isoform 2	6.65484	7.67113
ASHGA5P040266	0.00169285	0.0148069	2.02261	down	protein_coding	NM_003265	CCDS3846.1	TLR3	RefSeq	3057	chr4	+	186990308	187006252	GAACTCCATCTCATGTCCAACTCAATCCAGAAAATTAAAAATAATCCCTTTGTCAAGCAG	7098	toll-like receptor 3 precursor	4.67601	5.69223
ASHGA5P002782	0.0111403	0.0440551	2.02249	down	protein_coding	NM_016835	CCDS11501.1	MAPT	RefSeq	6762	chr17	+	43971747	44105699	CAAAAAAGCCAAGACATCCACACGTTCCTCTGCTAAAACCTTGAAAAATAGGCCTTGCCT	4137	microtubule-associated protein tau isoform 1	3.87704	4.89318
ASHGA5P003908	2.74539e-05	0.00135763	2.02093	down	protein_coding	NM_000834	CCDS8662.1	GRIN2B	RefSeq	5941	chr12	-	13714409	14133022	TAGTCACTGAGAATAAAACAGACGAGGAGCCGGGTTACATCAAAAAATGCTGCAAGGGGT	2904	glutamate [NMDA] receptor subunit epsilon-2 precursor	3.23537	4.25039
ASHGA5P003919	0.0101689	0.0414204	2.01491	down	protein_coding	NM_014456	CCDS7567.1	PDCD4	RefSeq	3644	chr10	+	112631552	112659764	AACCCTGCAGATCCTGATAACTTAAGTGACTCTCTCTTTTCCGGTGATGAAGAAAATGCT	27250	programmed cell death protein 4 isoform 1	3.72607	4.73679
ASHGA5P043858	0.0276746	0.0760922	2.01427	down	protein_coding	NM_001753	CCDS5767.1	CAV1	RefSeq	2723	chr7	+	116164838	116201239	ACCTCCTCACAGTTTTCATCCAGCCACGGGCCAGCATGTCTGGGGGCAAATACGTAGACT	857	caveolin-1 isoform alpha	5.34493	6.35518
ASHGA5P017764	0.0088961	0.0382221	2.01372	down	protein_coding	NM_001081461	CCDS42383.1	JMJD6	RefSeq	5445	chr17	-	74708913	74722881	GCTCCTCCAGGATTAGGGACACTTGTGGAGGCCGGGCTCACCCCTGAGCAGATAAAGAGA	23210	bifunctional arginine demethylase and lysyl-hydroxylase JMJD6 isoform 1	3.68229	4.69216
ASHGA5P029610	0.0353828	0.0868541	2.01253	down	protein_coding	NM_001014450	CCDS30867.1	SPRR2F	RefSeq	657	chr1	-	153084612	153085989	AACCATTAGAGAATTCTGTTGATGTTTTCTGTGTCTGTCTGTCCCCTGGGCATGAGCTTC	6705	small proline-rich protein 2F	5.30254	6.31156
ASHGA5P042633	9.18589e-06	0.00069316	2.00987	down	protein_coding	NM_001016	CCDS5164.1	RPS12	RefSeq	532	chr6	+	133135707	133138703	GGCCAAGGATGTCATTGAAGAGTATTTCAAATGCAAGAAATGAAGAAATAAATCTTTGGC	6206	40S ribosomal protein S12	9.17644	10.1835
ASHGA5P033091	0.0351676	0.0866601	2.00986	down	protein_coding	NM_000964	CCDS11366.1	RARA	RefSeq	3301	chr17	+	38465422	38513895	TCAATGGGTACCCGGTGCCTCCCTACGCCTTCTTCTTCCCCCCTATGCTGGGTGGACTCT	5914	retinoic acid receptor alpha isoform 1	9.43592	10.443
ASHGA5P051343	0.00354899	0.0226242	2.00939	down	protein_coding	NM_005650	CCDS14033.1	TCF20	RefSeq	7407	chr22	-	42556018	42611445	CCCCTTGCAGAACAAGACCGCGAAAGGCAGCCTCAGCACAGAGCAGTCGGAGCGGGGGTG	6942	transcription factor 20 isoform 1	7.05361	8.06037
ASHGA5P050477	0.00119763	0.01221	2.00773	down	protein_coding	NM_080667	CCDS1854.2	CCDC104	RefSeq	1315	chr2	+	55746739	55772216	AAAGTGGAAAGGTCTGAAACTTCCTCCCTCCCACAAAAAGACCTGAAGATTCCTGGCTTA	112942	coiled-coil domain-containing protein 104	9.85333	10.8589
ASHGA5P014552	1.74313e-05	0.00106331	2.00559	down	protein_coding	NM_020868	CCDS46400.1	DPP10	RefSeq	5253	chr2	+	115199898	116602326	AACAATCAAGGAACTGGGAAGTAACAGCCCTCCACAGAGAAACTGGAAGGGAATTGCTAT	57628	inactive dipeptidyl peptidase 10 isoform long	3.38363	4.38766
ASHGA5P049236	0.0209619	0.0647086	2.00461	down	protein_coding	NM_005950	CCDS10766.1	MT1G	RefSeq	396	chr16	-	56700652	56701977	CCCGTAAAATCCAGGATTTTTTGTTTTTTGCTACAATCTTGACCCCTTTGCTACATTCCT	4495	metallothionein-1G	5.46016	6.46348
ASHGA5P048787	0.00186712	0.0157064	2.00148	down	protein_coding	NM_033240	CCDS45298.1	PML	RefSeq	3751	chr15	+	74287013	74328735	CAGCCCAGGACTCCTGCCTCCCCCCATTTCAGGTCCCAGGGGGCACAGCCACAGCAGGTG	5371	protein PML isoform 2	10.8536	11.8547
ASHGA5P043982	0.00173012	0.0149488	2.00071	down	protein_coding	NM_001004685	CCDS43666.1	OR2F2	RefSeq	954	chr7	+	143632325	143633279	TCTATGCCATTGTTATGCCTCTGCTGAACCCTGTGATTTATAGTCTAAGGAATAAAGAGG	135948	olfactory receptor 2F2	5.8216	6.82212
ASHGA5P048435	0.0256564	0.0729887	2.00009	down	protein_coding	NM_020809	CCDS31673.1	ARHGAP20	RefSeq	6196	chr11	-	110447758	110583451	TTGAAGATTTTCTTCATGGAAGCGATGTCCCCCCAGCAGGAGACTCTAGGGGGACAGCCG	57569	rho GTPase-activating protein 20 isoform 1	6.57406	7.57413
