# Supplementary material for: Age and poverty status alter the coding and noncoding transcriptome
Source: Aging (Albany NY). 2019 Feb 17;11(4):1189–203. doi: 10.18632/aging.101823 (PMC6402526; doi:10.18632/aging.101823)
Supplement: Supplementary Table 8 [file aging-11-101823-s009.xlsx]

## Sheet: Sheet1
Supplementary Table 8. mRNAs significantly higher in abundance in white males living above poverty
ProbeName	P-value	FDR	Fold Change	Regulation	type	seqname	ccdsID	GeneSymbol	source	RNAlength	chrom	strand	txStart	txEnd	Sequence	EntrezID	product	group-AP(normalized)	group-BP(normalized)
ASHGA5P010424	0.0139663	0.0524613	16.026	up	protein_coding	ENST00000361365	CCDS14795.1	EIF1AY	GENCODE	1390	chrY	+	22737610	22755040	GAGAAAAAAGGTTTGGATAAATACATCAGACATTATATTGGTTGGTCTACGGGACTATCA	9086	"eukaryotic translation initiation factor 1A, Y-linked [Source:HGNC Symbol;Acc:3252]"	7.14616	3.14381
ASHGA5P050622	0.0204771	0.0654558	14.9441	up	protein_coding	NM_000576	CCDS2102.1	IL1B	RefSeq	1498	chr2	-	113587336	113594356	ATTTGTGTCTTCCTAAAGAGAGCTGTACCCAGAGAGTCCTGTGCTGAATGTGGACTCAAT	3553	interleukin-1 beta proprotein	6.90073	2.99923
ASHGA5P036990	0.00389445	0.0329783	11.0618	up	protein_coding	ENST00000480798	CCDS13165.2	CST7	GENCODE	930	chr20	+	24929865	24940564	AAATATATGCTGGAGGTGGAAATTGGCAGAACTACCTGCAAGAAAAACCAGCACCTGCGT	8530	cystatin F (leukocystatin) [Source:HGNC Symbol;Acc:2479]	7.1069	3.63938
ASHGA5P014053	0.00297205	0.0320046	10.0622	up	protein_coding	NM_002123	CCDS43451.1	HLA-DQB1	RefSeq	1656	chr6	-	32627240	32634466	AGTCAGAAAGGGCTTCTGCACTGACTCCTGAGACTATTTTAACTAGGATTGGTTATCACT	3119	"HLA class II histocompatibility antigen, DQ beta 1 chain isoform 1 precursor"	6.56393	3.23307
ASHGA5P012727	0.00819323	0.0396879	9.65809	up	protein_coding	NM_016085	CCDS46243.1	ATRAID	RefSeq	1098	chr2	+	27435218	27440046	TTTGCAATAACACTGGGGACCCAGAAATGTGTCCTGAGAATGGATCTTGTGTACCTGATG	51374	apoptosis-related protein 3 isoform a	6.25221	2.98047
ASHGA5P001763	0.00483442	0.0338278	9.46449	up	protein_coding	NM_018643	CCDS4854.1	TREM1	RefSeq	1633	chr6	-	41242998	41254457	TCAACCTTACAAATGTGACAGATATCATCAGGGTTCCGGTGTTCAACATTGTCATTCTCC	54210	triggering receptor expressed on myeloid cells 1 isoform 1 precursor	7.78588	4.54335
ASHGA5P018669	0.00497793	0.0338278	9.25871	up	protein_coding	NM_207422		FLJ44635	RefSeq	2269	chrX	+	71364033	71381600	AAGGATAATGGAAACCGTCATCATGATTATCTACTGGGACCTCATCAGCCACAGTGAGAT	392490	TPT1-like protein	7.42064	4.20983
ASHGA5P052679	0.0082158	0.039695	9.05471	up	protein_coding	NM_002124	CCDS47409.1	HLA-DRB1	RefSeq	1280	chr6	-	32546546	32557613	TGAAATGCAGATGACCACATTCAAGGAAGAACTTTCTGCCCCGGCTTTGCAGGATGAAAA	3123	"major histocompatibility complex, class II, DR beta 1 precursor"	9.45163	6.27297
ASHGA5P012584	0.00418678	0.0331313	8.74961	up	protein_coding	NM_002970	CCDS14207.1	SAT1	RefSeq	1089	chrX	+	23801274	23804327	ACTGGACTCCGGAAGGACACAGCATTGTTGGTTTTGCCATGTACTATTTTACCTATGACC	6303	diamine acetyltransferase 1	7.24244	4.11322
ASHGA5P000976	0.00513607	0.0338278	8.73027	up	protein_coding	NM_020529	CCDS9656.1	NFKBIA	RefSeq	1579	chr14	-	35870715	35873960	GGGCATCGTGGAGCTTTTGGTGTCCTTGGGTGCTGATGTCAATGCTCAGGAGCCCTGTAA	4792	NF-kappa-B inhibitor alpha	6.39976	3.27373
ASHGA5P012464	0.0231999	0.0707173	8.66512	up	protein_coding	NM_001001437	CCDS32626.1	CCL3L3	RefSeq	780	chr17	-	34522267	34524147	ACTTTGAGACGAGCAGCCAGTGCTCCAAGCCCAGTGTCATCTTCCTAACCAAGAGAGGCC	414062	C-C motif chemokine 3-like 1 precursor	7.22379	4.10858
ASHGA5P004963	0.00296978	0.0320046	8.66091	up	protein_coding	NM_014358	CCDS8594.1	CLEC4E	RefSeq	2158	chr12	-	8685900	8693558	GGAGGAGCAGGAATTCCTTTCCTACAAGAAACCTAAAATGAGAGAGTTTTTTATTGGACT	26253	C-type lectin domain family 4 member E	5.97269	2.85817
ASHGA5P054557	0.00412436	0.0330909	8.63651	up	protein_coding	NM_015960	CCDS7483.1	CUTC	RefSeq	1378	chr10	+	101491957	101515894	AAGTAAGGACTTTGAATGCTATCGCAAAGAACATCCTGGTGTAGCCAGACCTCTCTGAGA	51076	copper homeostasis protein cutC homolog	5.94751	2.83706
ASHGA5P006686	0.00396244	0.0329783	8.61826	up	protein_coding	NM_004152		OAZ1	RefSeq	1146	chr19	+	2269519	2273487	GCAAGGACAGCTTTGCAGTTCTCCTGGAGTTCGCTGAGGAGCAGCTGCGAGCCGACCATG	4946	ornithine decarboxylase antizyme 1	6.76208	3.65468
ASHGA5P011564	0.00123403	0.026401	8.43623	up	protein_coding	NM_001012	CCDS513.1	RPS8	RefSeq	705	chr1	+	45241245	45244412	CGAGCGATGGGCATCTCTCGGGACAACTGGCACAAGCGCCGCAAAACCGGGGGCAAGAGA	6202	40S ribosomal protein S8	10.5339	7.45733
ASHGA5P003600	0.00436046	0.0334484	8.30694	up	protein_coding	NM_006694	CCDS1057.1	JTB	RefSeq	1574	chr1	-	153946744	153950451	AAGCTGTCAGCAAGCACCTCAAATTTGCCATGCTGGCTGGTGGAAGAGTTTGTGGTAGCA	10899	protein JTB precursor	6.32757	3.27326
ASHGA5P005958	0.002119	0.0306124	8.15872	up	protein_coding	NM_213595	CCDS44966.1	ISCU	RefSeq	1093	chr12	+	108956293	108963160	TCACAAGAAGGTTGTTGATCATTATGAAAATCCTAGAAACGTGGGGTCCCTTGACAAGAC	23479	"iron-sulfur cluster assembly enzyme ISCU, mitochondrial isoform ISCU2"	5.79888	2.77053
ASHGA5P009120	0.00722429	0.0373841	8.06601	up	protein_coding	NM_199185	CCDS4377.1	NPM1	RefSeq	1362	chr5	+	170814707	170837888	GCCAGTGAAGAAAGGACAAGAATCCTTCAAGAAACAGGAAAAAACTCCTAAAACACCAAA	4869	nucleophosmin isoform 2	6.51515	3.5033
ASHGA5P004996	0.00299552	0.0321046	8.01015	up	protein_coding	NM_032231	CCDS10189.1	FAM96A	RefSeq	1108	chr15	-	64364760	64386207	CAGCGATGTTTACCATTTAAACATAAGTTGGAAATCTACATTTCTGAAGGAACCCACTCA	84191	MIP18 family protein FAM96A isoform a precursor	6.72235	3.72052
ASHGA5P010699	0.00156738	0.0280187	7.97462	up	protein_coding	NM_020197	CCDS31022.1	SMYD2	RefSeq	1689	chr1	+	214454564	214510477	ATATGGACAGAAAATCATTAAGCCCTACAGTAAGCACTATCCTTTGTACTCCCTCAACGT	56950	N-lysine methyltransferase SMYD2	6.57703	3.58161
ASHGA5P002618	0.0046929	0.0338278	7.8834	up	protein_coding	NM_017917	CCDS9654.1	PPP2R3C	RefSeq	1843	chr14	-	35554677	35591519	TGGAGAAATGGACTATAAGACCTACTTGGACTTTGTCCTTGCATTAGAAAACAGAAAGGA	55012	serine/threonine-protein phosphatase 2A regulatory subunit B'' subunit gamma	5.99993	3.02111
ASHGA5P007884	0.00335229	0.032685	7.77398	up	protein_coding	NM_001623	CCDS4706.1	AIF1	RefSeq	639	chr6	+	31583032	31584798	CCCTCCAAACTGGAAGGCTTCAAAGAGAAATACATGGAGTTTGACCTTAATGGAAATGGC	199	allograft inflammatory factor 1 isoform 3	7.64868	4.69002
ASHGA5P049810	0.00604034	0.0348208	7.76007	up	protein_coding	NM_004396	CCDS11659.1	DDX5	RefSeq	3769	chr17	-	62494373	62502484	TGTCTGCTGGTATACAGACCAGTTTTAGGACTGGTAATCCAACAGGGACTTACCAGAATG	1655	probable ATP-dependent RNA helicase DDX5	7.54899	4.59292
ASHGA5P003198	0.00335454	0.032685	7.61364	up	protein_coding	NM_003143	CCDS5866.1	SSBP1	RefSeq	714	chr7	+	141438120	141450288	TGTATTACAGGTACTTCGTCAGTTTGTAAGACATGAGTCCGAAACAACTACCAGTTTGGT	6742	"single-stranded DNA-binding protein, mitochondrial precursor"	6.13913	3.21055
ASHGA5P012604	0.00013109	0.0145843	7.58143	up	protein_coding	NM_004595	CCDS14203.1	SMS	RefSeq	1868	chrX	+	21958690	22012955	ACTTGGAATTGTGGGTATTTTACACTGTTTGGAAGAAAGCTAAACCCTGAAGATCAGTAG	6611	spermine synthase isoform 1	6.55241	3.62995
ASHGA5P036430	0.0169293	0.0582434	7.46622	up	protein_coding	NM_021141	CCDS2402.1	XRCC5	RefSeq	3448	chr2	+	216974019	217071016	AACACCGTATTTTATGAAGAGCATAGACTGCATCCGAGCCTTCCGGGAAGAAGCCATTAA	7520	X-ray repair cross-complementing protein 5	8.52823	5.62786
ASHGA5P030763	0.00737156	0.0377476	7.30939	up	protein_coding	NM_013272	CCDS10371.1	SLCO3A1	RefSeq	5106	chr15	+	92396937	92709137	CGTTTTATAGTGACTAAAGGAGGGCTGAACTCTGTATTAGTAATCCAAGGGTCATTTTTT	28232	solute carrier organic anion transporter family member 3A1 isoform 1	6.32093	3.45118
ASHGA5P031551	0.000115904	0.0145843	7.18057	up	protein_coding	NM_014287	CCDS10556.1	NOMO1	RefSeq	4261	chr16	+	14927642	14990014	AGCCAAGAAACAGAAGACAAGGCGGACTTGAGGAGGAAGGGGACAGTTGCAGTCTCACTT	23420	nodal modulator 1 precursor	7.08166	4.23756
ASHGA5P030649	0.00467098	0.0338278	7.06045	up	protein_coding	NM_006465	CCDS10264.1	ARID3B	RefSeq	4253	chr15	+	74833547	74890472	TTGAAGGTGTCTCAGACATTTGGCCAGTATGTCTTTCTCAGGGGTTTGGTCACAAAGGAT	10620	AT-rich interactive domain-containing protein 3B	5.43299	2.61323
ASHGA5P003569	0.00276069	0.0318783	7.03877	up	protein_coding	NM_031286	CCDS278.1	SH3BGRL3	RefSeq	1131	chr1	+	26606212	26608013	GTACTGTGGGGACTATGAGCTCTTCGTGGAGGCTGTGGAACAAAACACGCTGCAGGAGTT	83442	SH3 domain-binding glutamic acid-rich-like protein 3	6.01182	3.19649
ASHGA5P011004	0.00238338	0.031171	7.01343	up	protein_coding	NM_005621	CCDS1037.1	S100A12	RefSeq	466	chr1	-	153346183	153348075	TGTGCATTGAGGGGTTAACATTAGGCTGGGAAGATGACAAAACTTGAAGAGCATCTGGAG	6283	protein S100-A12	6.60917	3.79905
ASHGA5P054240	0.0111086	0.0465119	6.94182	up	protein_coding	NM_015714	CCDS1488.1	G0S2	RefSeq	978	chr1	+	209848669	209849735	AGAGCCCAGAGCCGAGATGGAAACGGTCCAGGAGCTGATCCCCCTGGCCAAGGAGATGAT	50486	G0/G1 switch protein 2	9.13116	6.33584
ASHGA5P055154	0.00487272	0.0338278	6.90964	up	protein_coding	NM_016090	CCDS8370.1	RBM7	RefSeq	2025	chr11	+	114271383	114279635	CACTAACACATGTTAAAAGGACATTGTTTTTATAGGGTCATTTTAGGCCCTTTGACTAAG	10179	RNA-binding protein 7	5.94511	3.1565
ASHGA5P042592	0.000387931	0.0201625	6.80653	up	protein_coding	ENST00000368605	CCDS34519.1	FAM26F	GENCODE	1109	chr6	+	116782555	116784934	AACCAGGCCAAGGCGTCGGACGTGCAGGACCTCCTGAAGGATCTGAAGGCTCAGTCGCAG	441168	"family with sequence similarity 26, member F [Source:HGNC Symbol;Acc:33391]"	7.69538	4.92846
ASHGA5P003228	0.00279073	0.0318783	6.80526	up	protein_coding	NM_002413	CCDS3749.1	MGST2	RefSeq	817	chr4	+	140586921	140625406	GAGAGAGTATTTCGGGCACAACAAAACTGTGTGGAGTTTTATCCTATATTCATAATTACA	4258	microsomal glutathione S-transferase 2 isoform 1 precursor	5.82083	3.05418
ASHGA5P001798	0.00271789	0.0318783	6.75694	up	protein_coding	NM_001081450	CCDS46175.1	LILRB3	RefSeq	2843	chr19	-	54720146	54726959	GAAAACCTCTATGCTGCCGTGAAGGACACACAGTCTGAGGACAGGGTGGAGCTGGACAGT	11025	leukocyte immunoglobulin-like receptor subfamily B member 3 isoform 1 precursor	5.8997	3.14333
ASHGA5P052678	0.00183278	0.0290776	6.75025	up	protein_coding	NM_019111	CCDS4750.1	HLA-DRA	RefSeq	1312	chr6	+	32407618	32412826	TGTTTCATAGACAAGTTCACCCCACCAGTGGTCAATGTCACGTGGCTTCGAAATGGAAAA	3122	"HLA class II histocompatibility antigen, DR alpha chain precursor"	7.37835	4.62341
ASHGA5P002106	0.00493426	0.0338278	6.69249	up	protein_coding	ENST00000253108	CCDS12227.1	EIF3G	GENCODE	1127	chr19	-	10225689	10230599	ACCTGGCTAAGGACAAGACCACTGGCCAATCCAAGGGCTTTGCCTTCATCAGCTTCCACC	8666	"eukaryotic translation initiation factor 3, subunit G [Source:HGNC Symbol;Acc:3274]"	6.57474	3.8322
ASHGA5P052901	0.00721233	0.0373841	6.67102	up	protein_coding	NM_138810	CCDS5263.1	TAGAP	RefSeq	1344	chr6	-	159459943	159466184	GAACAACAAGGTTTGTTCTGCTTACTGATGAGAAATCCCCAACTTATGATCTCACCATCT	117289	T-cell activation Rho GTPase-activating protein isoform c	7.46271	4.7248
ASHGA5P055883	0.00465637	0.0338278	6.66015	up	protein_coding	NM_080648	CCDS9550.1	APEX1	RefSeq	1497	chr14	+	20923289	20925931	ATATGATGAATGCTCGATCCAAGAATGTTGGTTGGCGCCTTGATTACTTTTTGTTGTCCC	328	DNA-(apurinic or apyrimidinic site) lyase	6.13174	3.39618
ASHGA5P030849	0.00766458	0.0384959	6.61033	up	protein_coding	NM_001001410	CCDS10435.1	TSR3	RefSeq	1214	chr16	-	1399240	1401873	ATCCCTTCGATGTGGATTCAGGGAGAGAGTTTGGAAACCCCAACAGGCCTGTGGCCAGCA	115939	probable ribosome biogenesis protein C16orf42	5.65118	2.92646
ASHGA5P055288	0.0168262	0.0580062	6.5795	up	protein_coding	NM_080387	CCDS8593.1	CLEC4D	RefSeq	1973	chr12	+	8666135	8674960	ATAGACGGCTTTCCTATTTCCTTGGACTTAGAGATGAGAATGCCAAAGGTCAGTGGCGTT	338339	C-type lectin domain family 4 member D	6.29588	3.57791
ASHGA5P012373	0.022706	0.069867	6.54375	up	protein_coding	NM_013300	CCDS31899.1	FAM216A	RefSeq	1529	chr12	+	110906231	110928192	TGGCGGCCAGTGAGAAACAAAGAAGGGATAAAAACTGGATATGCATCTAAAACAAGATGT	29902	protein FAM216A	5.9841	3.27399
ASHGA5P007572	0.0170444	0.0584602	6.47725	up	protein_coding	NM_002624	CCDS8853.1	PFDN5	RefSeq	743	chr12	+	53689234	53693234	CTGAACGTGCTGAACAAGAGCAACGAGGGGAAAGAATTACTCGTCCCACTGACGAGTTCT	5204	prefoldin subunit 5 isoform alpha	7.6269	4.93152
ASHGA5P005270	0.00529796	0.0340831	6.47722	up	protein_coding	NM_015702	CCDS2189.1	MMADHC	RefSeq	1466	chr2	-	150426146	150444330	CTTAGAAAAGTTCATCAATGGTGCTAAGGAAATTTGCTATGCTCTTCGAGCTGAGGGTTA	27249	"methylmalonic aciduria and homocystinuria type D protein, mitochondrial"	6.16635	3.47097
ASHGA5P012237	0.00371395	0.0329783	6.32715	up	protein_coding	NM_005516	CCDS34379.1	HLA-E	RefSeq	2679	chr6	+	30457182	30461982	GCTTGTAAAGCCTGAGACAGCTGCCTTGTGTGCGACTGAGATGCACAGCTGCCTTGTGTG	3133	"HLA class I histocompatibility antigen, alpha chain E precursor"	8.28271	5.62115
ASHGA5P012740	0.0221742	0.0688832	6.29812	up	protein_coding	NM_001014812	CCDS45278.1	FAM96A	RefSeq	1058	chr15	-	64364760	64386207	GGCGACTCTTATTGTTGGAAATCTACATTTCTGAAGGAACCCACTCAACAGAAGAAGACA	84191	MIP18 family protein FAM96A isoform b precursor	7.51624	4.86132
ASHGA5P025247	0.00453648	0.033633	6.27642	up	protein_coding	NM_014670		BZW1	RefSeq	3195	chr2	+	201676268	201688569	GAAAAAAAACAACATTCATTTCATGAAAGCCTTCCAGAAAATAGTGGTGCTTTTTTATAA	9689	basic leucine zipper and W2 domain-containing protein 1 isoform 4	6.2821	3.63216
ASHGA5P010954	6.22197e-06	0.00560452	6.24215	up	protein_coding	NM_153741	CCDS1095.1	DPM3	RefSeq	417	chr1	-	155112366	155112996	ACGTGGGGTAGAGTGACCATGACGAAATTAGCGCAGTGGCTTTGGGGACTAGCGATCCTG	54344	dolichol-phosphate mannosyltransferase subunit 3 isoform 2	6.84163	4.19958
ASHGA5P001538	0.010441	0.0449067	6.24175	up	protein_coding	NM_002923	CCDS1377.1	RGS2	RefSeq	1375	chr1	+	192778168	192781407	GGAAGCTCCAAAAGAGATAAACATAGATTTTCAAACCAAAACTCTGATTGCCCAGAATAT	5997	regulator of G-protein signaling 2	6.92837	4.28642
ASHGA5P001611	0.00464794	0.0338278	6.23573	up	protein_coding	NM_017657	CCDS1878.1	AFTPH	RefSeq	4054	chr2	+	64751438	64820138	CCTTTAGATGGTGTGGATCCGGAGTTGTATGAGTTAACAACTTCTAAGCTGGAAATCTCC	54812	aftiphilin isoform b	6.98963	4.34907
ASHGA5P021925	0.00270173	0.0318783	6.22473	up	protein_coding	NM_001173514	CCDS54255.1	TYROBP	RefSeq	575	chr19	-	36395302	36399211	GCTGTAAGTGATTGCAGTTGCTCTACGGTGAGCCCGGGCGTGCTGGCAGGGATCGTGATG	7305	TYRO protein tyrosine kinase-binding protein isoform 3 precursor	6.85213	4.21412
ASHGA5P006476	0.0080859	0.0394393	6.19003	up	protein_coding	NM_002831	CCDS44820.1	PTPN6	RefSeq	2321	chr12	+	7060433	7070479	CCTCGTCCAAACACAAGGAGGATGTGTATGAGAACCTGCACACTAAGAACAAGAGGGAGG	5777	tyrosine-protein phosphatase non-receptor type 6 isoform 1	7.04722	4.41727
ASHGA5P007491	0.000478871	0.0212428	6.1818	up	protein_coding	NM_001008237	CCDS33151.1	TTC32	RefSeq	838	chr2	-	20096513	20101744	GTCCCGGGAGCAAATGCAGCCCTGAGGATTTGGCTACTGCATATAACAACAGGGGGCAAA	130502	tetratricopeptide repeat protein 32	9.27486	6.64683
ASHGA5P006676	0.0184177	0.061214	6.16961	up	protein_coding	NM_007104	CCDS4806.1	RPL10A	RefSeq	719	chr6	+	35436177	35438558	AGAAGCCATGAGCAGCAAAGTCTCTCGCGACACCCTGTACGAGGCGGTGCGGGAAGTCCT	4736	60S ribosomal protein L10a	7.3883	4.76311
ASHGA5P004400	0.0138861	0.0522949	6.11664	up	protein_coding	NM_003681	CCDS13699.1	PDXK	RefSeq	7390	chr21	+	45138977	45182188	CCCCAATAACCTCAAGGTGGCCTGTGAGAAGACCGTGTCTACCTTGCACCACGTTCTGCA	8566	pyridoxal kinase	8.20193	5.58919
ASHGA5P046011	9.50916e-05	0.0145843	6.07597	up	protein_coding	NM_007313	CCDS35165.1	ABL1	RefSeq	5881	chr9	+	133589267	133763062	AAAGGGGTACCTATTATTACTTTATGGGGCAGCAGCCTGGAAAAGTACTTGGGGACCAAA	25	tyrosine-protein kinase ABL1 isoform b	6.3597	3.75659
ASHGA5P004910	0.00509354	0.0338278	6.05606	up	protein_coding	NM_018206	CCDS10721.1	VPS35	RefSeq	3298	chr16	-	46693588	46723144	AAATGATGCGGTAACAATTCAGGTTTTAAACCAGCTTATCCAAAAGATTCGAGAAGACCT	55737	vacuolar protein sorting-associated protein 35	6.32006	3.72168
ASHGA5P003892	0.00176909	0.0290206	6.01797	up	protein_coding	NM_003977	CCDS8168.1	AIP	RefSeq	1250	chr11	+	67250504	67258579	TTCCATCCTCAACAAGTACGACGACAACGTCAAGGCCTACTTCAAGCGGGGCAAGGCCCA	9049	AH receptor-interacting protein	7.87749	5.28821
ASHGA5P004782	0.00438011	0.0334484	5.98271	up	protein_coding	NM_020690	CCDS4224.1	ANKHD1-EIF4EBP3	RefSeq	8349	chr5	+	139781398	139929163	AAAGTTATCCAAAATTCAACTGAATGCACTGATGCCCAGCAGGCCAGTCTGCTTCCTTCA	404734	ANKHD1-EIF4EBP3 protein	5.80597	3.22517
ASHGA5P005023	0.00929112	0.0422162	5.96612	up	protein_coding	NM_206939	CCDS7985.1	MS4A7	RefSeq	2976	chr11	+	60145957	60163426	AGCTCTGTGTTTTGGCATTACTGGATCCCTCTCAATTATCTCTGGAAAACAATCAACTAA	58475	membrane-spanning 4-domains subfamily A member 7 isoform 1	6.52255	3.94576
ASHGA5P003726	0.0289495	0.0815567	5.95671	up	protein_coding	NM_138820	CCDS4401.1	HIGD2A	RefSeq	628	chr5	+	175815783	175816751	GAAAAGTTCGTTCGCAAGACCCGCGAGAACCCGGTGGTACCCATAGGTTGCCTGGCCACG	192286	HIG1 domain family member 2A	6.31165	3.73714
ASHGA5P054329	0.0110083	0.0461987	5.91899	up	protein_coding	NM_001139459	CCDS44343.1	CNST	RefSeq	2562	chr1	+	246729638	246811544	TTGATGATCTTGCCAAAAGGATAGAGATTGCAGAGGTAAATCAGAGATGAAGTACAATTA	163882	consortin isoform 2	6.25601	3.69066
ASHGA5P046209	0.00346578	0.0328172	5.89112	up	protein_coding	ENST00000545075	CCDS55427.1	MTRNR2L10	GENCODE	1121	chrX	-	55207823	55208944	TGATGCTATCTCAATCTAACAAATCATCACATACCCTACCCAAGAACAGGGTTTGTTAAG	100463488	MT-RNR2-like 10 [Source:HGNC Symbol;Acc:37167]	6.71161	4.15307
ASHGA5P001149	0.00449195	0.0335929	5.85969	up	protein_coding	NM_001281	CCDS12488.1	TBCB	RefSeq	1475	chr19	+	36605887	36616849	ATGTATGTAGGTCTCACAGATTTCAAGCCTGGCTACTGGATTGGTGTCCGCTATGATGAG	1155	tubulin-folding cofactor B	6.22	3.66917
ASHGA5P010883	0.00394651	0.0329783	5.85727	up	protein_coding	NM_012394	CCDS1217.1	PFDN2	RefSeq	668	chr1	-	161070345	161087866	AATGAGCACAGCCTAGTGATCGATACACTGAAGGAGGTAGATGAAACTCGTAAGTGCTAC	5202	prefoldin subunit 2	6.0011	3.45087
ASHGA5P026516	0.0044237	0.0334484	5.82664	up	protein_coding	NM_002228	CCDS610.1	JUN	RefSeq	3338	chr1	-	59246462	59249785	CTTCCAATTTGGAATCTTCTCTTTGACAATTCCTAGATAAAAAGATGGCCTTTGCTTATG	3725	transcription factor AP-1	7.91867	5.37601
ASHGA5P003539	0.0103236	0.0445718	5.80704	up	protein_coding	NM_000454	CCDS33536.1	SOD1	RefSeq	981	chr21	+	33031934	33041243	CAATTTCGAGCAGAAGGAAAGTAATGGACCAGTGAAGGTGTGGGGAAGCATTAAAGGACT	6647	superoxide dismutase [Cu-Zn]	7.45909	4.92129
ASHGA5P022049	0.00463467	0.0338278	5.80163	up	protein_coding	NM_000979	CCDS12726.1	RPL18	RefSeq	893	chr19	-	49118583	49122675	CGCCATCATGGGAGTGGACATCCGCCATAACAAGGACCGAAAGGTTCGGCGCAAGGAGCC	6141	60S ribosomal protein L18 isoform 1	6.60161	4.06515
ASHGA5P055279	0.0141853	0.0528436	5.79927	up	protein_coding	ENST00000456013	CCDS44821.1	PTPN6	GENCODE	2389	chr12	+	7060433	7070479	CCCGGCTGCAGACACAAGGAGGATGTGTATGAGAACCTGCACACTAAGAACAAGAGGGAG	5777	"protein tyrosine phosphatase, non-receptor type 6 [Source:HGNC Symbol;Acc:9658]"	6.75601	4.22014
ASHGA5P041323	0.00107768	0.0254127	5.77946	up	protein_coding	ENST00000368738	CCDS1036.1	S100A9	GENCODE	577	chr1	+	153330329	153333503	ACCCTGAACCAGGGGGAATTCAAAGAGCTGGTGCGAAAAGATCTGCAAAATTTTCTCAAG	6280	S100 calcium binding protein A9 [Source:HGNC Symbol;Acc:10499]	8.24562	5.71469
ASHGA5P010127	0.000943222	0.0248284	5.75712	up	protein_coding	NM_005016	CCDS44900.1	PCBP2	RefSeq	3187	chr12	+	53845885	53874946	TCATTGAGTGTGTCAAACAGATCTGCGTGGTCATGTTGGAGACTCTCTCCCAGTCCCCCC	5094	poly(rC)-binding protein 2 isoform a	6.58562	4.06027
ASHGA5P004263	0.018922	0.0621201	5.74995	up	protein_coding	NM_147223	CCDS1713.1	NCOA1	RefSeq	6952	chr2	+	24807345	24993570	CTTCTCAAAACAGAAGCAGATGGAACCCAGGACAAGAAGACAGAAGAGTTCTTCTCTGTG	8648	nuclear receptor coactivator 1 isoform 2	6.04809	3.52454
ASHGA5P051903	0.0378021	0.0976146	5.74085	up	protein_coding	NM_031950	CCDS3419.1	FGFBP2	RefSeq	1188	chr4	-	15961862	15964859	GGCCCTGTGCGCCTTTCTCATCAGCTTCTTCCGAGGGTGACAGGTGAAAGACCCCTACAG	83888	fibroblast growth factor-binding protein 2 precursor	8.171	5.64973
ASHGA5P006632	0.00631035	0.0354179	5.72777	up	protein_coding	NM_001008897	CCDS43522.1	TCP1	RefSeq	2377	chr6	-	160199529	160210735	TAATCAAAAATACTAAGGCTCGTACGTCTGCATCGATTATCTTACGTGGGGCAAATGATT	6950	T-complex protein 1 subunit alpha isoform b	7.6142	5.09623
ASHGA5P029071	0.00287736	0.0318783	5.72228	up	protein_coding	NM_178230	CCDS30835.1	PPIAL4A	RefSeq	660	chr1	-	147954759	147955419	GCCATAATGGCACTGGTGACAAGTCCATCTATGGGGAGAAATTTGATGATGAGAACCTCA	164022	peptidylprolyl cis-trans isomerase A-like 4B	7.85316	5.33657
ASHGA5P008902	0.00559124	0.0344573	5.70586	up	protein_coding	NM_007209	CCDS6858.1	RPL35	RefSeq	475	chr9	-	127620157	127624240	TGCAGCAATGGCCAAGATCAAGGCTCGAGATCTTCGCGGGAAGAAGAAGGAGGAGCTGCT	11224	60S ribosomal protein L35	8.10728	5.59484
ASHGA5P014451	0.00301204	0.0321046	5.70095	up	protein_coding	NM_001135188	CCDS46534.1	AGFG1	RefSeq	8678	chr2	+	228336887	228425938	CAGCCCAATGGTTTTGCAGCATTTGGACAAACAAAGCCAGTAGTAACCCCTTTTGGTCAA	3267	arf-GAP domain and FG repeat-containing protein 1 isoform 3	6.32495	3.81374
ASHGA5P047459	0.00512907	0.0338278	5.68084	up	protein_coding	NM_002727	CCDS7285.1	SRGN	RefSeq	1270	chr10	+	70847827	70864567	AAGAAAAAGGACCAATGTTCGAACTACTTCCAGGTGAATCCAACAAGATCCCCCGTCTGA	5552	serglycin precursor	7.72609	5.21998
ASHGA5P027101	0.00231286	0.0309607	5.66507	up	protein_coding	NM_024829	CCDS31751.1	PLBD1	RefSeq	1951	chr12	-	14656596	14720791	GGCGTGACCAAGGGAAAGTGACTGATACGGCATCCATGAAATATATCATGCGATACAACA	79887	phospholipase B-like 1 precursor	6.67162	4.16953
ASHGA5P041653	0.00289975	0.0319013	5.64164	up	protein_coding	ENST00000500576	CCDS54962.1	LYRM4	GENCODE	794	chr6	-	5186833	5261172	GTAGAAATTCAAACCCTAGTGAATAAAGCCAAGAGAGACCTTGGAGTAATTCGTCGACAG	57128	LYR motif containing 4 [Source:HGNC Symbol;Acc:21365]	6.72827	4.23216
ASHGA5P012593	0.00636419	0.0354584	5.62676	up	protein_coding	NM_030948		PHACTR1	RefSeq	2896	chr6	+	12717036	13288075	ACTTAACAAGGTTTCACCGACCTTAACAGTCGAATTCCTCTTGAGTGCTATGCTGTCTTC	221692	phosphatase and actin regulator 1	5.81299	3.32068
ASHGA5P050203	0.00470206	0.0338278	5.62592	up	protein_coding	NM_001020	CCDS12535.1	RPS16	RefSeq	603	chr19	-	39923846	39926618	TTTCCGGTTGCGGCGCCGCGCGGTGAGGTTGTCTAGTCCACGCTCGGAGCCATGCCGTCC	6217	40S ribosomal protein S16	7.17929	4.6872
ASHGA5P043215	0.00686726	0.03655	5.6127	up	protein_coding	NM_032164	CCDS5666.1	ZNF394	RefSeq	2259	chr7	-	99090853	99097877	GGGAAAGATTTAGACAAAGTACACACCTTATCCGACACCAAAGAATTCATCAAAATAAAG	84124	zinc finger protein 394	6.477	3.9883
ASHGA5P033063	0.00607293	0.0348634	5.61036	up	protein_coding	NM_024835	CCDS11314.1	GGNBP2	RefSeq	2869	chr17	+	34900736	34946276	AATGTACCACAGTTTGCAGAACCTACAGAAACGTTGTTTGGTCCCGATTCCGGAAAAGGT	79893	gametogenetin-binding protein 2	6.79532	4.30722
ASHGA5P022320	0.00336257	0.032685	5.6047	up	protein_coding	NM_006432	CCDS32121.1	NPC2	RefSeq	921	chr14	-	74946642	74960084	TCTTCTGCTGGGAAATCCCAGTACAGATCGTTTCTCATCTCTAAGTGCCTCATTGAGTTC	10577	epididymal secretory protein E1 precursor	7.05464	4.56801
ASHGA5P055504	0.00387102	0.0329783	5.59887	up	protein_coding	NM_001146181		LOC649330	RefSeq	1002	chr1	-	12907235	12908237	GACAGAGACAGCACCAATGGCCAGGATGACTCTTAAGCACATAGTGGGGTTGAGAAATCT	649330	heterogeneous nuclear ribonucleoprotein C-like	8.06008	5.57495
ASHGA5P005731	0.00565833	0.0345083	5.59447	up	protein_coding	NM_003295	CCDS9397.1	TPT1	RefSeq	829	chr13	-	45911303	45915297	ACCTCATCAGCCACGATGAGATGTTCTCCGACATCTACAAGATCCGGGAGATCGCGGACG	7178	translationally-controlled tumor protein	7.79365	5.30965
ASHGA5P050201	0.00551275	0.0343796	5.57007	up	protein_coding	NM_019088	CCDS12533.1	PAF1	RefSeq	2320	chr19	-	39876269	39881835	TCTTTGGCAGTGATGCTGATTCTGAGGACGATGCCGACTCTGATGATGAGGACAGAGGAC	54623	RNA polymerase II-associated factor 1 homolog isoform 1	6.44374	3.96604
ASHGA5P001157	0.0140338	0.0525791	5.55018	up	protein_coding	ENST00000221978	CCDS12830.1	NKG7	GENCODE	826	chr19	-	51874873	51875960	ATCATATCAGGCTACATCCACGTGACGCAGACCTTCAGCATTATGGCTGTTCTGTGGGCC	4818	natural killer cell group 7 sequence [Source:HGNC Symbol;Acc:7830]	5.57023	3.0977
ASHGA5P008672	0.00474478	0.0338278	5.53323	up	protein_coding	NM_001184762	CCDS55307.1	CLTA	RefSeq	1000	chr9	+	36190852	36212059	ACAAAAGCAAACAACAGGGCAGCAGAAGAAGCCTTTGTAAATGACATTGACGAGTCGTCC	1211	clathrin light chain A isoform f	6.16896	3.70084
ASHGA5P018316	0.00467672	0.0338278	5.51649	up	protein_coding	NM_001136180	CCDS45886.1	HSBP1L1	RefSeq	766	chr18	+	77724581	77730822	AAGAACAAATGCTGAAGACCTAACTGCAGCATGTCTGTATTTGGAGATGGGGCCTCTACA	440498	heat shock factor-binding protein 1-like protein 1	6.04944	3.58569
ASHGA5P001841	0.00328445	0.0326774	5.50961	up	protein_coding	ENST00000246554	CCDS12469.1	COX6B1	GENCODE	590	chr19	+	36139124	36149686	GTGCCTTTAGGATTCAGCACCATGGCGGAAGACATGGAGACCAAAATCAAGAACTACAAG	1340	cytochrome c oxidase subunit VIb polypeptide 1 (ubiquitous) [Source:HGNC Symbol;Acc:2280]	6.03773	3.57578
ASHGA5P021738	0.0111546	0.0466469	5.50831	up	protein_coding	NM_001177963	CCDS53899.1	MNAT1	RefSeq	1271	chr14	+	61201458	61435398	AGATGAGCTGGGTCAACATATTTCACTGGCACCTATTCACAAGCTTGAAGAAGCTCTGTA	4331	CDK-activating kinase assembly factor MAT1 isoform 2	7.29601	4.83441
ASHGA5P027654	0.0241521	0.0723244	5.50727	up	protein_coding	ENST00000528880	CCDS53842.1	HCAR3	GENCODE	2137	chr12	-	123199302	123201439	AGGATAGAAAGCTGTTTCCCACCTGTTTGCTTTTACCATTAAAAGGGAAACGTGCCTCTG	8843	hydroxycarboxylic acid receptor 3 [Source:HGNC Symbol;Acc:16824]	6.57522	4.11388
ASHGA5P000905	0.00290242	0.0319013	5.46035	up	protein_coding	NM_002305	CCDS13954.1	LGALS1	RefSeq	586	chr22	+	38071612	38075809	ACGCTAAGAGCTTCGTGCTGAACCTGGGCAAAGACAGCAACAACCTGTGCCTGCACTTCA	3956	galectin-1	7.32359	4.8746
ASHGA5P001255	0.0119203	0.0481492	5.45585	up	protein_coding	NM_002795	CCDS11328.1	PSMB3	RefSeq	784	chr17	+	36909001	36920478	ATGAGAAACGGTTTGGCCCTTACTACACTGAGCCAGTCATTGCCGGGTTGGACCCGAAGA	5691	proteasome subunit beta type-3	6.17024	3.72244
ASHGA5P033108	0.00822033	0.039695	5.45345	up	protein_coding	NM_005801	CCDS11403.1	EIF1	RefSeq	1326	chr17	+	39845126	39847898	TTTCCACCGAGGAAAAGGAATCGTATCGTATGTCCGCTATCCAGAACCTCCACTCTTTCG	10209	eukaryotic translation initiation factor 1	9.71933	7.27216
ASHGA5P034059	0.000881239	0.0244068	5.45037	up	protein_coding	ENST00000222190	CCDS12274.1	WDR83OS	GENCODE	861	chr19	-	12778880	12780465	ACGCCGGACTACATGAACCTGCTGGGCATGATCTTCAGCATGTGCGGCCTCATGCTTAAG	51398	WD repeat domain 83 opposite strand [Source:HGNC Symbol;Acc:30203]	6.10783	3.66148
ASHGA5P016096	0.00568123	0.0345083	5.4478	up	protein_coding	NM_001131063	CCDS47322.1	SAP30L	RefSeq	6105	chr5	+	153825516	153840613	CGACAAGAGCCTGCAGGTGAACACCCTACGACGTTATAAACGACACTACAAGTTGCAGAC	79685	histone deacetylase complex subunit SAP30L isoform 3	6.65461	4.20894
ASHGA5P002399	0.0056492	0.0345083	5.44777	up	protein_coding	NM_001037872	CCDS42722.1	REV1	RefSeq	4748	chr2	-	100016937	100106480	ACATGAAAAGGCTGATGCAGCAATCGGTGGAATCGGTTTGGAATATGGCATTTGACTTTA	51455	DNA repair protein REV1 isoform 2	6.28757	3.84191
ASHGA5P005879	0.00433332	0.0334484	5.44503	up	protein_coding	NM_016050	CCDS8139.1	MRPL11	RefSeq	1610	chr11	-	66202549	66206310	TGGTGAAGGACCTCAGTTCAGAAGAGCTTGCAGCTTTCCAGAAGGAACGAGCCATCTTCC	65003	"39S ribosomal protein L11, mitochondrial isoform a"	5.95019	3.50525
ASHGA5P005128	0.000809574	0.0239047	5.44103	up	protein_coding	NM_006356	CCDS11712.1	ATP5H	RefSeq	628	chr17	-	73034954	73043074	GTCGGTGAAGGATCCCAAAATGGCTGGGCGAAAACTTGCTCTAAAAACCATTGACTGGGT	10476	"ATP synthase subunit d, mitochondrial isoform a"	7.41506	4.97118
ASHGA5P009062	0.00836725	0.0400362	5.43753	up	protein_coding	NM_201436	CCDS5497.1	H2AFV	RefSeq	1351	chr7	-	44873212	44887725	CGAGAACATGTTTCCTGTGGGCCGCATCCACAGACACTTGAAGACTCGCACCACAAGCCA	94239	histone H2A.V isoform 3	5.62898	3.18603
ASHGA5P043944	0.00354782	0.0328487	5.4363	up	protein_coding	NM_001061	CCDS5855.1	TBXAS1	RefSeq	2082	chr7	+	139528951	139720125	TAGGGCTGCTTGAGGTCAAGTTGACACTGCTCCACGTGCTGCACAAGTTCCGGTTCCAAG	6916	thromboxane-A synthase isoform 1	6.15276	3.71014
ASHGA5P002912	0.00183627	0.0290776	5.43456	up	protein_coding	NM_014972	CCDS10987.1	TCF25	RefSeq	2286	chr16	+	89939993	89977792	GGCCAGAGAGGCTAAGTCCTATCAGCCATGGAAACACCATTGCTCTCTTCTTCCGGTCAC	22980	transcription factor 25	6.34576	3.90359
ASHGA5P054771	0.00261999	0.0316606	5.43211	up	protein_coding	NM_030771	CCDS31448.1	CCDC34	RefSeq	1488	chr11	-	27360060	27384795	ATCATCTCTGGTAATTCATAAAGCCAGGAGCAATCTTTGCCTTGGAACTCTGTGCAGAAT	91057	coiled-coil domain-containing protein 34 isoform 1	6.20871	3.7672
ASHGA5P007121	0.0059331	0.0347809	5.4267	up	protein_coding	NM_001040431	CCDS32660.1	COA3	RefSeq	772	chr17	-	40949651	40950704	TTGGCTATTTATGGTTACACCTTCTACTCGATTTCCCAGGAGCGTTTCCTAGATGAGCTA	28958	cytochrome oxidase assembly	5.6375	3.19743
ASHGA5P016457	0.00416048	0.0330909	5.41515	up	protein_coding	NM_001145645	CCDS45067.1	TNFSF13B	RefSeq	2618	chr13	+	108921976	108960832	GAAGAAACAGGATCTTACACATTTGTTCCATGGCTTCTCAGCTTTAAAAGGGGAAGTGCC	10673	tumor necrosis factor ligand superfamily member 13B isoform 2	8.24941	5.81241
ASHGA5P038920	0.0182864	0.060897	5.40856	up	protein_coding	ENST00000273352	CCDS2938.1	GPR128	GENCODE	3140	chr3	+	100328432	100414323	TTTTACTTTTGCCAGAATCCCAGTGGGCAGATATGGACCATCCTTGCAAACATGTGGCAA	84873	G protein-coupled receptor 128 [Source:HGNC Symbol;Acc:19241]	5.12035	2.6851
ASHGA5P012397	0.00408251	0.0330909	5.38199	up	protein_coding	NM_024808	CCDS9446.1	BORA	RefSeq	2803	chr13	+	73302041	73330328	TAATATGAAGCAAGACCACACAACACAGAGGTGTTGGATGAAAACAGCAAGCCCTTTTCA	79866	protein aurora borealis	5.63003	3.20189
ASHGA5P002614	0.0036414	0.0329783	5.37167	up	protein_coding	NM_018364	CCDS862.1	RSBN1	RefSeq	6604	chr1	-	114304453	114355070	TTGAAACAACCACCATTTCAAATTTTCACACTCAGGTCAACAGGACATACTGCTGTGGCA	54665	round spermatid basic protein 1	5.67687	3.2515
ASHGA5P049509	0.00377989	0.0329783	5.37073	up	protein_coding	NM_001042697	CCDS42266.1	ZSWIM7	RefSeq	2008	chr17	-	15879874	15903006	AGCATAAAAGGTACAGATTGAGCATCATTCTTTCAAAATAGAATCCTGTCAAGAAATGCA	125150	zinc finger SWIM domain-containing protein 7	6.30182	3.8767
ASHGA5P010107	0.00433002	0.0334484	5.37036	up	protein_coding	NM_001128913	CCDS44902.1	PCBP2	RefSeq	3094	chr12	+	53845885	53874946	ATGGCAACACCGGATTCAGTGGCATTGAATCCAGCTCTCCAGAGGTGAAAGGCTATTGGG	5094	poly(rC)-binding protein 2 isoform f	6.1813	3.75628
ASHGA5P055067	0.00073926	0.023569	5.36343	up	protein_coding	NM_007173	CCDS8278.1	PRSS23	RefSeq	3806	chr11	+	86511490	86522273	TTTGCTATTGGATTAAAGGAAACTACCTGGATTGTAGGGAGGGGTGACACAGTGTTCCCT	11098	serine protease 23 precursor	6.48456	4.06141
ASHGA5P054219	0.001462	0.0274621	5.33638	up	protein_coding	NM_182659	CCDS14784.1	UTY	RefSeq	4931	chrY	-	15409388	15592550	AAATGATTAAGTAAGTGCCTTCTGAAACTGCTGCAGTTTCTCTTTGGGGGTATTGGTAGC	7404	histone demethylase UTY isoform 2	7.1272	4.71134
ASHGA5P012596	0.00500256	0.0338278	5.33589	up	protein_coding	NM_014059	CCDS41880.1	RGCC	RefSeq	1126	chr13	+	42031541	42045013	ACTTTAGCAAGTATGTGAAACAAGAAGTTCTGGGTCCTTTCATCATAAGGGAGAAGCTTC	28984	regulator of cell cycle RGCC	6.87873	4.463
ASHGA5P005788	0.00442938	0.0334484	5.33301	up	protein_coding	NM_023075	CCDS11853.1	MPPE1	RefSeq	2976	chr18	-	11883471	11908796	GGAACAGAAACAACCCCAGTTTCATCATGGGTAGCATCACGCCCACAGACTACACCCTCT	65258	metallophosphoesterase 1 isoform 1	6.83216	4.41721
ASHGA5P011588	0.00638678	0.0354584	5.30278	up	protein_coding	NM_203290	CCDS4901.1	POLR1C	RefSeq	1353	chr6	+	43484776	43489246	CATTATATCTTCTCTGTTGAGTCAACGGGGGTGTTGCCACCAGATGTGCTGGTGAGTGAA	9533	DNA-directed RNA polymerases I and III subunit RPAC1	5.16338	2.75664
ASHGA5P005297	0.00440268	0.0334484	5.2941	up	protein_coding	NM_001002755	CCDS33217.1	NFU1	RefSeq	1104	chr2	-	69623244	69664760	TATCACCCAGTGAGATACATGTTTATTCAAACACAAGATACCCCAAATCCAAACAGCTTA	27247	"NFU1 iron-sulfur cluster scaffold homolog, mitochondrial isoform 2"	5.57465	3.17027
ASHGA5P011682	0.00451754	0.033633	5.26756	up	protein_coding	NM_001184979	CCDS434.1	NDUFS5	RefSeq	580	chr1	+	39491966	39500308	CGAGCATCGGCCATGCCTTTCTTGGACATCCAGAAAAGGTTCGGCCTTAACATAGATCGA	4725	NADH dehydrogenase [ubiquinone] iron-sulfur protein 5	6.44998	4.05285
ASHGA5P006105	0.0107521	0.0457907	5.24985	up	protein_coding	NM_004604	CCDS10700.1	STX4	RefSeq	1403	chr16	+	31044902	31051485	TTGGATAATGTCGCACATTGTTGGCACTAGGAGCACCAGGAACCCAGGGCCTGGCCTTCT	6810	syntaxin-4	6.43365	4.04137
ASHGA5P044882	0.00816091	0.0396275	5.22806	up	protein_coding	NM_015364	CCDS6216.1	LY96	RefSeq	642	chr8	+	74903563	74941307	TTAACCCCTGTATAGAATTGAAAAGATCCAAAGGATTATTGCACATTTTCTACATTCCAA	23643	lymphocyte antigen 96 isoform 1 precursor	6.84708	4.4608
ASHGA5P040234	0.00157979	0.0280187	5.22215	up	protein_coding	NM_003864	CCDS3817.1	SAP30	RefSeq	1126	chr4	+	174292092	174298683	AGAAAAGGGAGTGATGATGATGGAGGTGATTCACCTGTTCAAGATATTGATACCCCAGAG	8819	histone deacetylase complex subunit SAP30	6.3114	3.92675
ASHGA5P009645	0.00361571	0.0329783	5.21925	up	protein_coding	NM_007047	CCDS4605.1	BTN3A2	RefSeq	3812	chr6	+	26365397	26378548	TCTTCGTCCGATACCAATAAGTCAGCCTGATGCTCTAATGGAAAAATGGCCCTCTTCAAG	11118	butyrophilin subfamily 3 member A2 isoform a precursor	6.203	3.81916
ASHGA5P000958	0.00343412	0.0328172	5.20343	up	protein_coding	NM_002788	CCDS9731.1	PSMA3	RefSeq	1014	chr14	+	58711522	58738727	GAAAATAGTAGTACAGCTATTGGAATCAGATGCAAAGATGGTGTTGTCTTTGGGGTAGAA	5684	proteasome subunit alpha type-3 isoform 1	7.15477	4.7753
ASHGA5P010151	0.00500603	0.0338278	5.18977	up	protein_coding	ENST00000359678	CCDS2304.1	HIBCH	GENCODE	1939	chr2	-	191069359	191184771	TGGAGTATCGGCTAAGTCAAGCTTGTATGAGAGGTCATGACTTTCATGAAGGCGTTAGAG	26275	3-hydroxyisobutyryl-CoA hydrolase [Source:HGNC Symbol;Acc:4908]	5.50355	3.12788
ASHGA5P055115	0.00212156	0.0306124	5.18217	up	protein_coding	NM_001191016		CASP12	RefSeq	1688	chr11	-	104756444	104769397	TTTCAACAACCGTAACTGCCAGAGTCTGAAAGACAAACCCAAGGTCATCATCATGCAAGC	100506742	inactive caspase-12	5.3737	3.00014
ASHGA5P003791	0.00425678	0.0333311	5.17788	up	protein_coding	NM_005005	CCDS6352.1	NDUFB9	RefSeq	736	chr8	+	125551342	125562227	TGCGTCCAGAGAGACAAATACCGATACTTTGCTTGTTTGATGAGAGCCCGGTTTGAAGAA	4715	NADH dehydrogenase [ubiquinone] 1 beta subcomplex subunit 9	6.82839	4.45603
ASHGA5P002343	0.008619	0.0405176	5.17337	up	protein_coding	NM_018064	CCDS5013.1	AKIRIN2	RefSeq	1948	chr6	-	88384577	88411985	ATATGGAGAACAGCCTGCTAGCTATGTTTCATGAATCACGTATCCTGCATTTGTGGGCTG	55122	akirin-2	6.11052	3.73942
ASHGA5P014546	0.0232678	0.0708396	5.1267	up	protein_coding	NM_015079	CCDS32301.2	TBC1D2B	RefSeq	6035	chr15	-	78287326	78369994	ACTCGCACTATCCTTGATGCTAGATCCGGAACCGACGCGCCTACCACTTGGAGAAAGTCC	23102	TBC1 domain family member 2B isoform b	5.84307	3.48504
ASHGA5P005036	0.00614071	0.0350489	5.09715	up	protein_coding	NM_014685	CCDS10771.1	HERPUD1	RefSeq	2198	chr16	+	56965747	56977793	AATGTGAAGAGTCCTTCAAAAATGCCAGAAATCAACGCCAAGGTGGCTGAATCCACAGAG	9709	homocysteine-responsive endoplasmic reticulum-resident ubiquitin-like domain member 1 protein isoform 1	5.78744	3.43775
ASHGA5P001384	0.00375488	0.0329783	5.08994	up	protein_coding	NM_014034	CCDS47469.1	ASF1A	RefSeq	2525	chr6	+	119215240	119230335	CTTTTCTAAGCTTCAAAGGAATATTTTGGCATCTAATCCCAGGGTCACAAGATTCCACAT	25842	histone chaperone ASF1A	6.36922	4.02157
ASHGA5P046634	0.00271846	0.0318783	5.08991	up	protein_coding	NM_181777	CCDS14582.1	UBE2A	RefSeq	2678	chrX	+	118714297	118718379	CTGAAGAATATCCAAATAAACCACCTACAGTTAGATTTGTCTCTAAGATGTTCCATCCAA	7319	ubiquitin-conjugating enzyme E2 A isoform 3	5.72564	3.378
ASHGA5P012653	0.00369795	0.0329783	5.08485	up	protein_coding	NM_001172415	CCDS55301.1	BAG1	RefSeq	3885	chr9	-	33252469	33264759	TTGAAAAGGAAAGGCTTGGTAAAAAAGGTTCAGGCATTCCTAGCCGAGTGTGACACAGTG	573	BAG family molecular chaperone regulator 1 isoform BAG-1S	6.49465	4.14845
ASHGA5P001471	0.00565047	0.0345083	5.08229	up	protein_coding	NM_005875	CCDS2690.1	EIF1B	RefSeq	1014	chr3	+	40351172	40353915	TCTCTTGGAGGTTGGCATTGTAAAGGAGGAACAGCTTAAGGTTCATGGATTCTAAAATGA	10289	eukaryotic translation initiation factor 1b	6.6183	4.27283
ASHGA5P003246	0.027917	0.0798401	5.03744	up	protein_coding	NM_080426	CCDS46624.1	GNAS	RefSeq	1884	chr20	+	57466425	57486250	TGAGTTTCTGAGGATCAGCACTGCCAGTGGAGATGGGCGTCACTACTGCTACCCTCATTT	2778	protein ALEX GNASS	7.02078	4.68809
ASHGA5P049861	0.00837547	0.040038	5.03537	up	protein_coding	NM_001143999	CCDS11752.1	SEC14L1	RefSeq	5542	chr17	+	75137004	75213181	TGATCTCCAGGTAGTGCCGCGCTGCCTGCACCTAGTGTGCAGAGGGGACGGCCGCCCCTC	6397	SEC14-like protein 1 isoform a	5.04007	2.70797
ASHGA5P009313	0.0205843	0.0657074	5.02612	up	protein_coding	NM_019554	CCDS1042.1	S100A4	RefSeq	564	chr1	-	153516094	153518282	ATAGTACGTGTTGATCCTGACTGCTGTCATGGCGTGCCCTCTGGAGAAGGCCCTGGATGT	6275	protein S100-A4	6.73011	4.40067
ASHGA5P002080	0.0192842	0.0629037	5.02551	up	protein_coding	NM_005720	CCDS5661.1	ARPC1B	RefSeq	1551	chr7	+	98972297	98992404	AGAAGATGGCCGTCGCGACTCTGGCCTCTGAAACACTACCACTGCTGGCGCTGACCTTCA	10095	actin-related protein 2/3 complex subunit 1B	5.13978	2.81051
ASHGA5P015226	0.00428432	0.0334484	5.01699	up	protein_coding	NM_015184	CCDS33713.1	PLCL2	RefSeq	3964	chr3	+	16974581	17132098	CATCTTAAAGGGACAAGCAGATCTTTTGAAATATGCTAAGAATGAGACATTGGAGAACCT	23228	inactive phospholipase C-like protein 2 isoform 2	5.52358	3.19676
ASHGA5P009097	0.00986433	0.0436458	5.0104	up	protein_coding	NM_145897	CCDS8854.1	PFDN5	RefSeq	608	chr12	+	53689234	53693234	GAGCTGAATCTGCCGCAGCTAGAAATGCTCAAGAACCAGCTGGACCAGATGTATGTCCCT	5204	prefoldin subunit 5 isoform gamma	6.25323	3.92831
ASHGA5P004186	0.0179644	0.0602778	5.00661	up	protein_coding	NM_014435	CCDS43239.1	NAAA	RefSeq	1880	chr4	-	76834808	76862166	AGCAAACCTCAGCCTGGAGGCACTTTTCCAGATTTTGTCGGTGGTTCCAGTTTATAACAA	27163	N-acylethanolamine-hydrolyzing acid amidase isoform 1 precursor	6.33256	4.00873
ASHGA5P008392	0.00293402	0.0319884	4.98294	up	protein_coding	NM_004597	CCDS33053.1	SNRPD2	RefSeq	767	chr19	-	46190711	46195443	TGACCATCATGAGCCTCCTCAACAAGCCCAAGAGTGAGATGACCCCAGAGGAGCTGCAGA	6633	small nuclear ribonucleoprotein Sm D2 isoform 1	8.27979	5.96279
ASHGA5P044671	0.00132766	0.0270465	4.98049	up	protein_coding	NM_016353	CCDS47810.1	ZDHHC2	RefSeq	4012	chr8	+	17013835	17080241	TGTTAACCAGGATCCTGAACAAGCATCTACTCCTGCAGGGCTGAATTCCACAGCTAAAAA	51201	palmitoyltransferase ZDHHC2	5.28483	2.96854
ASHGA5P011326	0.000108406	0.0145843	4.96771	up	protein_coding	NM_003902	CCDS683.1	FUBP1	RefSeq	2884	chr1	-	78413590	78444777	AGCACCTCAGGGCCAATAATAAGAAGTGGACAATACAGTATTTGCTTCATTGTGTGGGGG	8880	far upstream element-binding protein 1	7.53172	5.21914
ASHGA5P042896	0.00318349	0.0325604	4.95401	up	protein_coding	NM_006854	CCDS5351.1	KDELR2	RefSeq	2874	chr7	-	6500711	6523849	TGGCCGGCGTAGTCCAGACCATCCTATACTGTGACTTCTTCTACTTGTACATTACAAAAG	11014	ER lumen protein retaining receptor 2 isoform 1	5.34116	3.03256
ASHGA5P001245	0.00519359	0.0340239	4.95381	up	protein_coding	NM_002983	CCDS11307.1	CCL3	RefSeq	813	chr17	-	34415602	34417506	ACCAGTTCTCTGCATCACTTGCTGCTGACACGCCGACCGCCTGCTGCTTCAGCTACACCT	6348	C-C motif chemokine 3 precursor	8.88568	6.57714
ASHGA5P014228	0.00382036	0.0329783	4.94659	up	protein_coding	NM_001004333	CCDS45594.1	RNASEK	RefSeq	830	chr17	+	6915735	6917852	GATCATGTTGATAATGCTCGGAATATTTTTCAATGTCCATTCCGCTGTGTTGATTGAGGA	440400	ribonuclease kappa	5.9325	3.62606
ASHGA5P004946	0.00354802	0.0328487	4.9434	up	protein_coding	NM_148923	CCDS12004.1	CYB5A	RefSeq	850	chr18	-	71920526	71959251	CAGACCAAAGTTAAACAAGCCTCCGGAAACTCTTATCACTACTATTGATTCTAGTTCCAG	1528	cytochrome b5 isoform 1	5.41622	3.11071
ASHGA5P021909	0.00439768	0.0334484	4.93807	up	protein_coding	ENST00000544216	CCDS12435.1	LSM14A	GENCODE	3715	chr19	+	34663351	34720420	TGAATATAGGAAAGACAACAAAGTTGCTGCATAGTCTACAAACAAGTCTCTGAAAATAGG	26065	"LSM14A, SCD6 homolog A (S. cerevisiae) [Source:HGNC Symbol;Acc:24489]"	5.58961	3.28566
ASHGA5P005934	0.00956778	0.0429181	4.92962	up	protein_coding	NM_015247	CCDS45482.1	CYLD	RefSeq	8730	chr16	+	50775960	50835846	GATCGGGATGGTGGTCAGAATGGCTTCAACATTCCTCAAGTCACCCCATGCCCAGAAGTA	1540	ubiquitin carboxyl-terminal hydrolase CYLD isoform 1	7.04576	4.74428
ASHGA5P011208	0.00882105	0.0410762	4.92922	up	protein_coding	NM_003491	CCDS14737.1	NAA10	RefSeq	1136	chrX	-	153195279	153200607	ACCTCTATTCCAACACCCTCAACTTTCAGATCAGTGAAGTGGAGCCCAAATACTATGCAG	8260	N-alpha-acetyltransferase 10 isoform 1	6.95947	4.65811
ASHGA5P001039	0.00441345	0.0334484	4.9254	up	protein_coding	NM_003254	CCDS14281.1	TIMP1	RefSeq	931	chrX	+	47441689	47446190	TTTCTCATTGCTGGAAAACTGCAGGATGGACTCTTGCACATCACTACCTGCAGTTTTGTG	7076	metalloproteinase inhibitor 1 precursor	6.12103	3.82079
ASHGA5P005303	0.0143189	0.0530424	4.91965	up	protein_coding	NM_205840	CCDS54986.1	LST1	RefSeq	609	chr6	+	31554976	31556686	CATCGAAGAGGCCCAGGGCTCCTCAGAGCAGGAACTCCACTATGCATCTCTGCAGAGGCT	7940	leukocyte-specific transcript 1 protein isoform 5	6.27086	3.9723
ASHGA5P042125	0.00582513	0.0347584	4.91424	up	protein_coding	NM_007044	CCDS5217.1	KATNA1	RefSeq	2051	chr6	-	149916010	149969940	TGCAAGTATAGCAGAAAACATGGAAGGTTATTCAGGTGCGGACATTACCAACGTGTGCAG	11104	katanin p60 ATPase-containing subunit A1 isoform 1	5.67951	3.38254
ASHGA5P004598	0.00472487	0.0338278	4.88371	up	protein_coding	NM_173647	CCDS2051.1	RNF149	RefSeq	2968	chr2	-	101892062	101925178	AAATACGGCATTGCTAGAAGCCGGCAGGAGTGACTCTCGGCATGGAGGACCCATCTCCTA	284996	E3 ubiquitin-protein ligase RNF149 precursor	6.42634	4.13837
ASHGA5P055760	0.00485672	0.0338278	4.88109	up	protein_coding	NM_001009814	CCDS31963.1	VWA8	RefSeq	3453	chr13	-	42293472	42535221	TGGCAAAGGAGTAAGGCAAATTCAGTACTCTTCTGATTCTTAAATGCTGATAGTTCTTGA	23078	uncharacterized protein KIAA0564 isoform b precursor	5.89686	3.60965
ASHGA5P011168	0.0273601	0.0786669	4.87252	up	protein_coding	NM_001191003	CCDS53573.1	GSTO1	RefSeq	1070	chr10	+	106013951	106027222	GTTTTCTAAGGTGCCATCCTTGGTAGGAAGCTTTATTAGAAGCCAAAATAAAGAAGACTA	9446	glutathione S-transferase omega-1 isoform 3	9.66047	7.37581
ASHGA5P009615	0.0040073	0.0330479	4.86771	up	protein_coding	NM_017569	CCDS9362.1	FAM48A	RefSeq	2981	chr13	-	37583450	37633850	TTAACCTTACTGGAGTAGGAAGTTTTATGCAGTCACAGGCAGCTGCAGTTGCGATTCTTG	55578	protein FAM48A isoform b	6.31011	4.02687
ASHGA5P054127	0.00362069	0.0329783	4.86468	up	protein_coding	NM_001166599	CCDS55497.1	FAM122B	RefSeq	4277	chrX	-	133903595	133931185	GGATGATCTCTCACCCAAGTGACTTAACCATTTCTGATTCAACGTTTTAACTGCTGTTTC	159090	protein FAM122B isoform 2	5.14963	2.86728
ASHGA5P032360	0.0061393	0.0350489	4.85402	up	protein_coding	NM_021006	CCDS11310.1	CCL3L1	RefSeq	804	chr17	-	34623841	34625730	TTTTGTTCAGGGCTGTGATCGGCCTGGGGAAATAATAAAGATGTTCTTTTAAACGGTAAA	6349	C-C motif chemokine 3-like 1 precursor	10.0876	7.8084
ASHGA5P029432	0.0049642	0.0338278	4.85315	up	protein_coding	NM_002934	CCDS9561.1	RNASE2	RefSeq	735	chr14	+	21423629	21424594	TGTGGTAACCCAAATATGACCTGTCCTAGTAACAAAACTCGCAAAAATTGTCACCACAGT	6036	non-secretory ribonuclease precursor	6.43833	4.15941
ASHGA5P034132	0.00512434	0.0338278	4.83956	up	protein_coding	ENST00000359788	CCDS32981.1	ZNF675	GENCODE	2209	chr19	-	23835707	23870017	GGAGAGAAACTACAGAACTGGAATGTGTGATAATGATTTTGACAACACCTCAAATTTTTC	171392	zinc finger protein 675 [Source:HGNC Symbol;Acc:30768]	5.5243	3.24943
ASHGA5P006649	0.00394954	0.0329783	4.83018	up	protein_coding	NM_005528	CCDS41666.1	DNAJC4	RefSeq	1300	chr11	+	63997752	64001753	ATCATCACAGCCTTCTACAACGAAGCCCGGGCACGGGCCAGGGCCAACAGAGGCATCCTT	3338	dnaJ homolog subfamily C member 4	5.80417	3.5321
ASHGA5P009751	0.0194425	0.0631789	4.81569	up	protein_coding	NM_152392	CCDS1868.1	AHSA2	RefSeq	3059	chr2	+	61404554	61414686	TGACACTGAGAATTTACAACGGGAATGATTTTACCAACGAAAGCTATGGCAACCCAGGAA	130872	activator of 90 kDa heat shock protein ATPase homolog 2	6.18357	3.91583
ASHGA5P021777	0.0140571	0.052629	4.79489	up	protein_coding	NM_001170766	CCDS53561.1	LCOR	RefSeq	7793	chr10	+	98592016	98724198	AATTAATGAGTGGATGACAATCGAGCAGCAGAAGAATGGTGTGCCTACCCTTTAATGCTG	84458	ligand-dependent corepressor isoform 2	5.37867	3.11718
ASHGA5P011138	0.00467344	0.0338278	4.79267	up	protein_coding	NM_033020	CCDS873.1	TRIM33	RefSeq	8288	chr1	-	114935398	115053781	GTTTAATGAAGCTGATTCAGAAGTAGCTCAGGCAGGGAAAGCAGTTGCATTGTACTTTGA	51592	E3 ubiquitin-protein ligase TRIM33 isoform beta	7.1553	4.89447
ASHGA5P053382	0.0125201	0.0495937	4.78927	up	protein_coding	NM_005662	CCDS6131.1	VDAC3	RefSeq	1554	chr8	+	42249278	42263455	ACTTTATCAGCTTTAATCGATGGGAAGAACTTCAGTGCAGGAGGTCACAAGGTTGGCTTG	7419	voltage-dependent anion-selective channel protein 3 isoform 1	6.26495	4.00514
ASHGA5P008278	0.00474638	0.0338278	4.78349	up	protein_coding	NM_017994	CCDS5536.1	TMEM248	RefSeq	4238	chr7	+	66386202	66423538	ATTTTGTCCCGAGAAGGTGGCTTTGGCTGAAGCCTAATTCCACAGCTCCTTGTTTTTTGA	55069	transmembrane protein 248	6.8548	4.59673
ASHGA5P005126	0.00510507	0.0338278	4.77943	up	protein_coding	NM_005809	CCDS12281.1	PRDX2	RefSeq	1039	chr19	-	12907633	12912694	CATGGGGAAGTTTGTCCCGCTGGCTGGAAGCCTGGCAGTGACACGATTAAGCCCAACGTG	7001	peroxiredoxin-2 isoform a	5.72986	3.47302
ASHGA5P006613	0.000297163	0.0187505	4.77601	up	protein_coding	NM_001004	CCDS7717.1	RPLP2	RefSeq	511	chr11	+	809935	812876	ACGCCGCCGCGATGCGCTACGTCGCCTCCTACCTGCTGGCTGCCCTAGGGGGCAACTCCT	6181	60S acidic ribosomal protein P2	11.6734	9.41759
ASHGA5P056048	0.00417412	0.0330909	4.76752	up	protein_coding	NM_006370	CCDS9786.1	VTI1B	RefSeq	1357	chr14	-	68117866	68141602	TCCGAAACCCCATGATGTCTAAGCTTCGAAACTACCGGAAGGACCTTGCTAAACTCCATC	10490	vesicle transport through interaction with t-SNAREs homolog 1B	6.44066	4.18742
ASHGA5P007249	0.00644203	0.0355515	4.75963	up	protein_coding	NM_001311	CCDS10004.1	CRIP1	RefSeq	480	chr14	+	105953256	105955124	TGCAACAAGGAGGTGTACTTCGCCGAGAGGGTGACCTCTCTGGGCAAGGACTGGCATCGG	1396	cysteine-rich protein 1	7.27965	5.02879
ASHGA5P003301	0.00848466	0.0401641	4.75232	up	protein_coding	NM_016422	CCDS7803.1	RNF141	RefSeq	4084	chr11	-	10533224	10562774	TTGATAAATGGAGTGATCGACACAGGAATTGCCCTATTTGTCGCCTACAGATGACTGGAG	50862	RING finger protein 141	5.47886	3.23022
ASHGA5P003722	0.00343677	0.0328172	4.75178	up	protein_coding	ENST00000274680	CCDS4494.1	FARS2	GENCODE	1841	chr6	+	5261583	5771816	AAGGTTGATCTCATAGACAAGTTTGTACATCCAAAGACGCACAAGACCAGCCACTGCTAC	10667	"phenylalanyl-tRNA synthetase 2, mitochondrial [Source:HGNC Symbol;Acc:21062]"	5.74312	3.49466
ASHGA5P005049	0.0411449	0.103161	4.74755	up	protein_coding	ENST00000300584	CCDS45314.1	TBC1D2B	GENCODE	6067	chr15	-	78287326	78369994	TATCTCCGCTACTTCACTCGCACTATCCTTGATGCTAGGAAGCTGATCAGTATCTCCTTT	23102	"TBC1 domain family, member 2B [Source:HGNC Symbol;Acc:29183]"	6.0501	3.80292
ASHGA5P008627	0.0347343	0.0920734	4.73454	up	protein_coding	ENST00000420646	CCDS43252.1	SNCA	GENCODE	3127	chr4	-	90645249	90758127	AGTTGGGCAAGGAAGGGTATCAAGACTACGAACCTGAAGCCTAAGAAATATCTTTGCTCC	6622	"synuclein, alpha (non A4 component of amyloid precursor) [Source:HGNC Symbol;Acc:11138]"	6.10299	3.85977
ASHGA5P007232	0.00864925	0.0406082	4.73149	up	protein_coding	NM_013345	CCDS9997.1	GPR132	RefSeq	3652	chr14	-	105515736	105531754	AAGAATGTGAATGTGCCCAATGCTACTGAAAAACGGTTACAATGGAAACGCCACCCCAGT	29933	probable G-protein coupled receptor 132	5.72374	3.48144
ASHGA5P055050	0.00565231	0.0345083	4.72076	up	protein_coding	NM_145018	CCDS8263.1	C11orf82	RefSeq	3577	chr11	+	82612736	82645699	GTCACCTGAATTGTTTTCATAAAAAGTCACCTGAACCCAATTCCTGAACTTTTAAATCTG	220042	nitric oxide-inducible gene protein	7.50094	5.26192
ASHGA5P013797	0.00583364	0.0347584	4.71941	up	protein_coding	NM_001145295	CCDS46779.1	NGLY1	RefSeq	2421	chr3	-	25760434	25824989	CTGGCACATGATAACAGTCTTCACTCCTATGCTGATTTTTCTGGTGCCACTGAAGTTATT	55768	peptide-N(4)-(N-acetyl-beta- glucosaminyl)asparagine amidase isoform 4	6.67151	4.4329
ASHGA5P002513	0.00122985	0.026401	4.71454	up	protein_coding	NM_018097	CCDS10090.1	HAUS2	RefSeq	3953	chr15	+	42841010	42862190	AATCTACCAGAAAAACCTGGAAATTGAACTCCTGAAACTAGAAAAAGATACAGCAGATGT	55142	HAUS augmin-like complex subunit 2 isoform 1	5.49337	3.25625
ASHGA5P049790	0.0156478	0.0557357	4.70499	up	protein_coding	ENST00000521764	CCDS11630.1	NACA2	GENCODE	770	chr17	-	59667793	59668563	CCTGCACAAAATGCCGGGCGAAGCCACAGAAACCGTCCCTGCTACAGAGCAGGAGTTGCC	342538	nascent polypeptide-associated complex alpha subunit 2 [Source:HGNC Symbol;Acc:23290]	5.42785	3.19366
ASHGA5P007147	0.00391541	0.0329783	4.6995	up	protein_coding	NM_001008215	CCDS33257.1	COA5	RefSeq	1767	chr2	-	99215785	99224981	TGTGGTCCAGGAAGGAAAATCACCTCGGCAGTGTTTGAAGGAAGGATACTGCAACTCTTT	493753	cytochrome c oxidase assembly factor 5	6.15647	3.92396
ASHGA5P005952	0.00503263	0.0338278	4.66821	up	protein_coding	NM_152516	CCDS1869.1	COMMD1	RefSeq	725	chr2	+	62132802	62363205	TTTCTGGCAAAGATGAGGGGGATTCTTAAGTCTATTGCGTCTGCAGACATGGATTTCAAC	150684	COMM domain-containing protein 1	6.50042	4.27755
ASHGA5P011113	0.014267	0.0530424	4.66302	up	protein_coding	NM_001017986	CCDS30821.1	FCGR1B	RefSeq	1917	chr1	-	120926127	120935944	TACACTGTGAAAGGCCTCCAGTTACCAACTCCTGTCTGGTTTCATGTCCTTTTCTATCTG	2210	high affinity immunoglobulin gamma Fc receptor IB isoform 1 precursor	6.22097	3.9997
ASHGA5P012661	0.00654091	0.0357469	4.66225	up	protein_coding	NM_020233	CCDS11159.2	ADPRM	RefSeq	1518	chr17	+	10600926	10614875	ATTCTCTGACACAAACCAAGAAAAGGTGGTGATTGTGAGCCATCTTCCCATTTACCCGGA	56985	manganese-dependent ADP-ribose/CDP-alcohol diphosphatase	6.01146	3.79044
ASHGA5P011836	0.0160286	0.0563923	4.65852	up	protein_coding	NM_014222	CCDS6835.1	NDUFA8	RefSeq	859	chr9	-	124906337	124922098	ACTGTCAAAGGTCACCAAAGTGAAAACAGATCGACCTTTACCGGAGAATCCCTATCACTC	4702	NADH dehydrogenase [ubiquinone] 1 alpha subcomplex subunit 8	6.54439	4.32452
ASHGA5P009565	0.0268173	0.0776543	4.65173	up	protein_coding	NM_001079862	CCDS42740.1	DBI	RefSeq	616	chr2	+	120124503	120130122	GATGTCTCAGGCTGAGTTTGAGAAAGCTGCAGAGGAGGTTAGGCACCTTAAGACCAAGCC	1622	acyl-CoA-binding protein isoform 3	5.48115	3.26338
ASHGA5P010839	0.00483561	0.0338278	4.65144	up	protein_coding	ENST00000367819	CCDS1273.1	XCL2	GENCODE	565	chr1	-	168510002	168513235	GAGCAGTAATTTTTATTACCAAACGTGGCCTAAAAGTCTGTGCTGATCCACAAGCCACGT	6846	chemokine (C motif) ligand 2 [Source:HGNC Symbol;Acc:10646]	5.48342	3.26575
ASHGA5P003524	0.00563708	0.0345083	4.65133	up	protein_coding	NM_006701	CCDS32852.1	TXNL4A	RefSeq	1415	chr18	-	77732866	77748532	GTACAGCATCGCCGAGAAGGTTAAAAATTTTGCAGTTATTTATCTTGTGGATATTACAGA	10907	thioredoxin-like protein 4A	5.67493	3.45728
ASHGA5P011005	0.000541839	0.0220186	4.62991	up	protein_coding	NM_016567	CCDS7649.1	BCCIP	RefSeq	1461	chr10	+	127512103	127542264	ATACAGCACAATGGTGGTTCACGGGGGCAAGTGACAGCCCTGGTTTCTCTGAAGGCTGGA	56647	BRCA2 and CDKN1A-interacting protein isoform BCCIPalpha	6.31536	4.10438
ASHGA5P001480	0.00217189	0.0306998	4.60983	up	protein_coding	NM_021103	CCDS1970.1	TMSB10	RefSeq	482	chr2	+	85132762	85133799	AACGAGACTGCACGGATTGTTTTAAGAAAATGGCAGACAAACCAGACATGGGGGAAATCG	9168	thymosin beta-10	12.0426	9.83787
ASHGA5P012134	0.0124682	0.0495181	4.60546	up	protein_coding	NM_006573	CCDS9509.1	TNFSF13B	RefSeq	2675	chr13	+	108921976	108960832	ATACAAAAAGGATCTTACACATTTGTTCCATGGCTTCTCAGCTTTAAAAGGGGAAGTGCC	10673	tumor necrosis factor ligand superfamily member 13B isoform 1	8.38597	6.18262
ASHGA5P043785	0.00507973	0.0338278	4.60085	up	protein_coding	NM_004126	CCDS5634.1	GNG11	RefSeq	964	chr7	+	93551015	93555826	GGAAAAACTGAAAATGGAAGTTGAGCAGCTTCGCAAAGAAGTGAAGTTGCAGAGACAACA	2791	guanine nucleotide-binding protein G(I)/G(S)/G(O) subunit gamma-11 precursor	6.55872	4.35683
ASHGA5P054894	0.0023861	0.031171	4.59415	up	protein_coding	ENST00000273550	CCDS41655.1	FTH1	GENCODE	1229	chr11	-	61731756	61735132	TTTGGTACCCAGGTGTTGTCTTTGAGGTCTTGGGATGAATCAGAAATCTATCCAGGCTAT	2495	"ferritin, heavy polypeptide 1 [Source:HGNC Symbol;Acc:3976]"	8.09417	5.89438
ASHGA5P009035	0.0118076	0.0478854	4.59183	up	protein_coding	NM_183420	CCDS5952.1	FBXO25	RefSeq	2502	chr8	+	356807	419875	TGCATTTCTGTCGGCACTGCAGCATTCTCTTTTGGAAGGACTCAGGACACCCCTGCACGG	26260	F-box only protein 25 isoform 2	9.16702	6.96795
ASHGA5P005015	0.00253499	0.0314036	4.59152	up	protein_coding	NM_130434	CCDS10210.1	DPP8	RefSeq	4096	chr15	-	65737997	65810035	CGGGGGGAAGGAAAATGCAACATGGCAGCAGCAATGGAAACAGAACAGCTGGGTGTTGAG	54878	dipeptidyl peptidase 8 isoform 1	6.55233	4.35336
ASHGA5P006089	0.0057875	0.0347584	4.58979	up	protein_coding	NM_001002264	CCDS31964.1	EPSTI1	RefSeq	3201	chr13	-	43460523	43566407	GGCACCTAAGGGTATATGAGAAAATATTGACTCCTATCTGGCCTTCATCAACTGACCTCG	94240	epithelial-stromal interaction protein 1 isoform 1	6.05844	3.86002
ASHGA5P010029	0.000275387	0.0187505	4.58105	up	protein_coding	NM_014639	CCDS4072.1	TTC37	RefSeq	5704	chr5	-	94799598	94890709	ATTCAAACGCAAAATGGGGGCAAGAGAGACACGGCGTCTTTTGGAAAGAGTGGTATATCA	9652	tetratricopeptide repeat protein 37	6.48215	4.28647
ASHGA5P001463	0.00406173	0.0330909	4.56942	up	protein_coding	NM_020685	CCDS2896.1	C3orf14	RefSeq	832	chr3	+	62305395	62319320	TTCTCTTGAGACTCGTTACTGGGCATCAGTAGAAGAATATATTCCCAAATGGGAACAGTT	57415	uncharacterized protein C3orf14	5.60796	3.41594
ASHGA5P007930	0.000544713	0.0220186	4.553	up	protein_coding	NM_198481	CCDS12872.1	VSTM1	RefSeq	1034	chr19	-	54544079	54567207	GATGAACTTGAAGCTCCCTCAATGAAAACAGACACCAGAACCATCTTTGTCGCCATCTTC	284415	V-set and transmembrane domain-containing protein 1 precursor	8.25817	6.07136
ASHGA5P002594	0.00677871	0.0363557	4.54733	up	protein_coding	NM_013269	CCDS8602.1	CLEC2D	RefSeq	5284	chr12	+	9822303	9852151	AATGGATAAATGGTACTGAATGGACAAGACAGTTTCCTATCCTGGGAGCAGGAGAGTGTG	29121	C-type lectin domain family 2 member D isoform 1	5.80954	3.62452
ASHGA5P017136	0.00309302	0.0323215	4.53794	up	protein_coding	NM_207118	CCDS5256.1	GTF2H5	RefSeq	7503	chr6	+	158589378	158620376	TTATAGAATGTGATCCTGCCATGAAGCAGTTTCTGCTGTACTTGGATGAGTCCAATGCCC	404672	general transcription factor IIH subunit 5	5.50479	3.32275
ASHGA5P012416	0.0014199	0.0274621	4.5377	up	protein_coding	NM_198220	CCDS13123.1	SNRPB2	RefSeq	1592	chr20	+	16710608	16722417	TAGGCCTTAGATTTTTTACTGTCTCCTGAAGAATTTAACACAAACATGGATATCAGACCA	6629	U2 small nuclear ribonucleoprotein B''	5.70305	3.52109
ASHGA5P021223	0.00287398	0.0318783	4.53148	up	protein_coding	NM_001114173	CCDS44693.1	CTSC	RefSeq	6099	chr11	-	88053980	88070941	TATATGATTTGCCACATCTGAGGAACAAACTGGCCATGAACAGACGTTGGGGCTAAGAGA	1075	dipeptidyl peptidase 1 isoform c precursor	7.62961	5.44962
ASHGA5P008716	0.00271855	0.0318783	4.51333	up	protein_coding	NM_201434	CCDS11419.1	RAB5C	RefSeq	1819	chr17	-	40276993	40307062	AACGAAATCTTCATGGCAATAGCTAAGAAGCTTCCCAAGAACGAGCCCCAGAATGCAACT	5878	ras-related protein Rab-5C isoform a	5.44981	3.27562
ASHGA5P049413	0.00302222	0.0321505	4.49712	up	protein_coding	NM_002615	CCDS11012.1	SERPINF1	RefSeq	1552	chr17	+	1665258	1680859	TTGTTTGATTCACCAGACTTTAGCAAGATCACAGGCAAACCCATCAAGCTGACTCAGGTG	5176	pigment epithelium-derived factor precursor	5.05958	2.89057
ASHGA5P000897	0.00474374	0.0338278	4.49091	up	protein_coding	NM_001084393	CCDS42988.1	DDTL	RefSeq	1641	chr22	+	24309025	24314748	TCTTTGAGTTTCTCACCAAGGAGCTAGCCCTGGGCCAGGACCGGTTCCCTACGGTCTTAT	100037417	D-dopachrome decarboxylase-like protein	6.59307	4.42607
ASHGA5P023143	0.00276346	0.0318783	4.48401	up	protein_coding	NM_001002245	CCDS11789.1	ANAPC11	RefSeq	799	chr17	+	79849598	79858363	GGAAGGGCGGGCTCTGCTGCCATGAAGGTGAAGATTAAGTGCTGGAACGGCGTGGCCACT	51529	anaphase-promoting complex subunit 11 isoform 2	5.64939	3.4846
ASHGA5P006620	0.026669	0.077379	4.4792	up	protein_coding	NM_015344	CCDS6075.1	LEPROTL1	RefSeq	2721	chr8	+	29952921	29965587	AGCACATCTGATTGAGTGGGGAGCTTGTGCACTTGTTCTCACAGGAAACACAGTCATCTT	23484	leptin receptor overlapping transcript-like 1 isoform 1	6.73842	4.57518
ASHGA5P052834	0.0101284	0.0441878	4.47059	up	protein_coding	NM_016104	CCDS43496.1	RWDD1	RefSeq	1323	chr6	+	116892582	116914436	GAGAATTTCTTAAATTGGAAAGCCAAGTTTGATGCAGAACTCTTGGAAATTAAAAAGAAA	51389	RWD domain-containing protein 1 isoform b	6.46131	4.30085
ASHGA5P016412	0.00882041	0.0410762	4.4654	up	protein_coding	NM_003333	CCDS12382.1	UBA52	RefSeq	2801	chr19	+	18682613	18688270	GGCCGAGCTGACGCAAACATGCAGATCTTTGTGAAGACCCTCACTGGCAAAACCATCACC	7311	ubiquitin-60S ribosomal protein L40 precursor	8.5411	6.38231
ASHGA5P013824	0.00522209	0.0340573	4.46301	up	protein_coding	NM_001012633	CCDS32378.1	IL32	RefSeq	919	chr16	+	3115312	3119668	TTTGTGACAAGTCCTACGGAGCCCCACGGGGGGACAAGGAGGAGCTGACACCCCAGAAGT	9235	interleukin-32 isoform A	7.43651	5.27849
ASHGA5P052556	0.00386641	0.0329783	4.45948	up	protein_coding	NM_032292	CCDS1121.1	GON4L	RefSeq	4738	chr1	-	155734575	155826972	AGAACTCCAGGTGAGAGCTGGAGAATATTCTCAAGTATTTCGTGGACTCAGTAATATGTA	54856	GON-4-like protein isoform b	6.22797	4.07109
ASHGA5P055897	0.00978016	0.0434309	4.45001	up	protein_coding	NM_001077443	CCDS45079.1	HNRNPC	RefSeq	3187	chr14	-	21677295	21737638	ATGACTCTTAAGCACATAGTGGGGTTTAGAAATCTTATCCCATTATTTCTTTACCTAGGC	3183	heterogeneous nuclear ribonucleoproteins C1/C2 isoform b	7.5588	5.405
ASHGA5P001768	0.00301192	0.0321046	4.44408	up	protein_coding	NM_003144	CCDS4499.1	SSR1	RefSeq	9874	chr6	-	7281287	7313541	AATCAAATCAATAAAGCTTCACCAAGAAGGTTGCCCAGGAAACGGGCACAGAAGAGATCA	6745	translocon-associated protein subunit alpha precursor	5.87612	3.72423
ASHGA5P002595	0.00397988	0.0330479	4.43804	up	protein_coding	NM_001004419	CCDS31741.1	CLEC2D	RefSeq	5366	chr12	+	9822303	9852151	AAAGGTTTCACAAGTTCCTCGAATGAATCCAAGACCTGTCATGGTTTCCTATCCTGGGAG	29121	C-type lectin domain family 2 member D isoform 2	5.91861	3.76869
ASHGA5P006155	0.0226191	0.069706	4.43661	up	protein_coding	ENST00000314595	CCDS3511.1	POLR2B	GENCODE	3748	chr4	+	57845108	57897334	TGAAGAACCGCCACGATATTTGCTGAAGTTTGAACAAATTTATCTTTCCAAGCCTACCCA	5431	"polymerase (RNA) II (DNA directed) polypeptide B, 140kDa [Source:HGNC Symbol;Acc:9188]"	6.42249	4.27303
ASHGA5P005767	0.0116656	0.0477022	4.43254	up	protein_coding	NM_024557	CCDS7788.1	RIC3	RefSeq	5827	chr11	-	8127596	8190590	ACACCTGAAGGAAAATTGGGCCGATTTCCACCTATGATGCATCATCACCAGGCACCCTCA	79608	protein RIC-3 isoform a precursor	6.57412	4.42599
ASHGA5P000640	0.0150339	0.0544096	4.43062	up	protein_coding	NM_004075	CCDS9112.1	CRY1	RefSeq	3273	chr12	-	107385142	107487598	CACTAATTAGAAAACATTCAGGAGGAATACTGTTGCAGCTGAAATTGGTGGGGAGTTCAA	1407	cryptochrome-1	6.28708	4.13957
ASHGA5P045445	0.000219747	0.0182999	4.43013	up	protein_coding	NM_194252	CCDS6834.2	TTLL11	RefSeq	2023	chr9	-	124751189	124855885	TCGTGTAGGATGAGTGATCGGGGTGGGATGGCCAGAGGAGGGGACAGTGTTGGTGGTGCT	158135	tubulin polyglutamylase TTLL11 isoform b	5.62041	3.47306
ASHGA5P005462	0.00488167	0.0338278	4.42187	up	protein_coding	NM_002201	CCDS10345.1	ISG20	RefSeq	974	chr15	+	89182038	89198879	CAGGCTAGAGATCCTGCAGCTCCTGAAAGGCAAGCTGGTGGTGGGTCATGACCTGAAGCA	3669	interferon-stimulated gene 20 kDa protein	5.99971	3.85505
ASHGA5P051184	0.00341164	0.0328172	4.41011	up	protein_coding	NM_001696	CCDS13745.1	ATP6V1E1	RefSeq	1406	chr22	-	18074902	18111588	ACTAAGCCTTCAGGAGGTGGAGCTCGTCGTCAGCTCTCCTGCTGTGATGTGGAAGCTTCT	529	V-type proton ATPase subunit E 1 isoform a	5.64514	3.50432
ASHGA5P009769	0.00469327	0.0338278	4.40678	up	protein_coding	NM_014183	CCDS13235.1	DYNLRB1	RefSeq	702	chr20	+	33104203	33128762	GTTGCACCAGATAAAGACTATTTCCTGATTGTGATTCAGAATCCAACCGAATAAGCCACT	83658	dynein light chain roadblock-type 1	6.62782	4.48809
ASHGA5P020234	0.00367906	0.0329783	4.39908	up	protein_coding	NM_001033112	CCDS4211.1	PAIP2	RefSeq	1521	chr5	+	138678133	138705409	AACCTTTGGGGTTAAAAACGACAACCAACATCAGCCATGAAAGATCCAAGTCGCAGCAGT	51247	polyadenylate-binding protein-interacting protein 2	5.35544	3.21823
ASHGA5P028246	0.00502055	0.0338278	4.38364	up	protein_coding	NM_001008394	CCDS53822.1	EID3	RefSeq	1486	chr12	+	104697509	104698982	GGCAGCTTTTGAAATTTCTGAGGCTATGATTACATACTCCTCATACTAAAGATTTCTTAG	493861	EP300-interacting inhibitor of differentiation 3	5.33675	3.20463
ASHGA5P010877	0.0047598	0.0338278	4.37206	up	protein_coding	NM_004550	CCDS1224.1	NDUFS2	RefSeq	2059	chr1	+	161169104	161184184	TGTCGTTGCCATCATAGGTACCCAAGATATTGTATTTGGAGAAGTAGATCGGTGAGCAGG	4720	"NADH dehydrogenase [ubiquinone] iron-sulfur protein 2, mitochondrial isoform 1 precursor"	6.42263	4.29432
ASHGA5P014033	0.0195861	0.0635021	4.36706	up	protein_coding	NM_001134493	CCDS47424.1	TOMM6	RefSeq	881	chr6	+	41755180	41757634	AGCCAAGTAGTTCTAATGCCACCTGTCGTCTTATCATCTGATTGCAGACAAATGGAATCC	100188893	mitochondrial import receptor subunit TOM6 homolog	6.36362	4.23695
ASHGA5P007680	0.0372181	0.0965718	4.3619	up	protein_coding	NM_001114735	CCDS45322.1	BCL2A1	RefSeq	955	chr15	-	80253231	80263643	ACAAGAAGAGGAAAATGGCTTTGTAAAGAAGTTTGAACCTAAATCTGGCTGGATGACTTT	597	bcl-2-related protein A1 isoform 2	8.05006	5.9251
ASHGA5P047293	0.00780933	0.0387311	4.35792	up	protein_coding	NM_001145373	CCDS44366.1	OTUD1	RefSeq	3125	chr10	+	23728197	23731310	CAGCAATAGAGAGGTTTCCTAAATTATCACATGAAGAGGATAGGCTAATCATGAGTAATT	220213	OTU domain-containing protein 1	6.27597	4.15233
ASHGA5P055276	0.0290777	0.081765	4.34156	up	protein_coding	NM_000365	CCDS8566.1	TPI1	RefSeq	1366	chr12	+	6976692	6980110	AATGGTTGGGACCAGGCCAATCCCTTCTCCACTTACTATAATGGTTGGAACTAAACGTCA	7167	triosephosphate isomerase isoform 1	7.62035	5.50213
ASHGA5P034474	0.00357734	0.0328981	4.33515	up	protein_coding	NM_152262	CCDS12268.1	ZNF439	RefSeq	2566	chr19	+	11976843	11980306	GGAAACCCTATGAATGTAAGCAATGTGGCAAAAGCTTTCACTTCTTCCAGTTCTTTTCAA	90594	zinc finger protein 439	6.52071	4.40463
ASHGA5P010146	0.00432911	0.0334484	4.32781	up	protein_coding	NM_001001486	CCDS33856.1	ATP2C1	RefSeq	3514	chr3	+	130613433	130735555	AAGCATGTTAGTTCGACATCATCATCTTTTCTTGAAGTCTGGCTCTGGGAGAGGAGTGGA	27032	calcium-transporting ATPase type 2C member 1 isoform 1d	5.41712	3.30348
ASHGA5P016800	0.0194884	0.063286	4.30771	up	protein_coding	NM_001098478	CCDS43439.1	HLA-F	RefSeq	1025	chr6	+	29691116	29694303	TACTTGGAGAATGGGAAGGAGACGCTACAGCGCGCAGAGCAGTCTCCCCAGCCCACCATC	3134	"HLA class I histocompatibility antigen, alpha chain F isoform 3 precursor"	5.94416	3.83723
ASHGA5P022443	9.70061e-05	0.0145843	4.30578	up	protein_coding	NM_194279	CCDS32122.1	ISCA2	RefSeq	1061	chr14	+	74960449	74962271	TACAAATTTTCACTGGATACAGTTATCAACCCCGACGACAGGGTATTTGAACAGGGTGGG	122961	"iron-sulfur cluster assembly 2 homolog, mitochondrial precursor"	5.33357	3.22729
ASHGA5P013535	0.00283724	0.0318783	4.30242	up	protein_coding	NM_007200	CCDS32319.1	AKAP13	RefSeq	13290	chr15	+	85923846	86292589	ACCACCGGAGTTCAATGCGAGTTCTTGGGGATGTTGTCAGGAGACCTCCCATTCATAGGA	11214	A-kinase anchor protein 13 isoform 2	5.37495	3.2698
ASHGA5P001514	0.0288377	0.0813541	4.29815	up	protein_coding	NM_005813	CCDS1789.1	PRKD3	RefSeq	5907	chr2	-	37477645	37544222	CTGGCTACAGGACTATCAGACTTGGCTTGACCTTAGAGAATTTGAAACTCGCATTGGAGA	23683	serine/threonine-protein kinase D3	5.81855	3.71483
ASHGA5P005612	0.0134673	0.0516038	4.29647	up	protein_coding	NM_002948	CCDS2640.1	RPL15	RefSeq	2350	chr3	+	23958294	23962347	CAGCCATCAGGTAAGCCAAGATGGGTGCATACAAGTACATCCAGGAGCTATGGAGAAAGA	6138	60S ribosomal protein L15 isoform 1	6.39274	4.28959
ASHGA5P001989	0.00225362	0.0309205	4.29411	up	protein_coding	NM_024057	CCDS9089.1	NUP37	RefSeq	1228	chr12	-	102467972	102512361	CTCGGTCCAGTTATCCTCAAAATAAGAGACCTGTTCACATGGATCGAGCCTGCTTATTCA	79023	nucleoporin Nup37	5.15519	3.05284
ASHGA5P009988	0.00477159	0.0338278	4.2921	up	protein_coding	ENST00000358465	CCDS872.1	TRIM33	GENCODE	8339	chr1	-	114935398	115053781	TAATTTGAAGGCTGATTCAGAAGTAGCTCAGGCAGGGAAAGCAGTTGCATTGTACTTTGA	51592	tripartite motif containing 33 [Source:HGNC Symbol;Acc:16290]	7.27699	5.1753
ASHGA5P000913	0.00386251	0.0329783	4.28756	up	protein_coding	NM_172002	CCDS13845.1	HSCB	RefSeq	1106	chr22	+	29138042	29153496	ACTGTACCTTCTAAAGCTCCATGGAATAGAGATTCCTGAAAGGACAGATTATGAAATGGA	150274	"iron-sulfur cluster co-chaperone protein HscB, mitochondrial precursor"	5.21152	3.11136
ASHGA5P007142	0.0221156	0.0688011	4.27722	up	protein_coding	NM_006384	CCDS10360.1	CIB1	RefSeq	995	chr15	-	90773476	90777279	TTATGCCTTCCGCATCTTTGACTTTGATGATGACGGAACCTTGAACAGAGAAGACCTGAG	10519	calcium and integrin-binding protein 1	5.41519	3.31852
ASHGA5P000654	0.00254941	0.0314036	4.27031	up	protein_coding	NM_198175	CCDS11578.1	NME1	RefSeq	1031	chr17	+	49230919	49239450	ACAAGTTGGCAGGAACATTATACATGGCAGTGATTCTGTGGAGAGTGCAGAGAAGGAGAT	4830	nucleoside diphosphate kinase A isoform a	6.70365	4.60931
ASHGA5P050867	0.000741152	0.023569	4.26443	up	protein_coding	NM_080678	CCDS2523.1	UBE2F	RefSeq	2206	chr2	+	238875586	238951423	AAGTGGATGACTACATCAAACGTTATGCCAGATGATAAAAGGGGACGATTGCAGGCCCAT	140739	NEDD8-conjugating enzyme UBE2F isoform 1	8.38784	6.29549
ASHGA5P050877	0.0218061	0.0680989	4.2441	up	protein_coding	NM_002712	CCDS2546.1	PPP1R7	RefSeq	1299	chr2	+	242089901	242122439	CGTGCGGCAGATCGATGCCACGTTCGTCAGGTTCTGAGTCCTTCTTGGCTCCTCATGTGG	5510	protein phosphatase 1 regulatory subunit 7	7.20337	5.11791
ASHGA5P000994	4.27899e-05	0.0121181	4.24067	up	protein_coding	NM_001336	CCDS13474.1	CTSZ	RefSeq	1517	chr20	-	57570241	57582309	ATGGGACTGAGTACTGGATTGTCCGGAATTCATGGGGTGAACCATGGGGCGAGAGAGGCT	1522	cathepsin Z preproprotein	7.69545	5.61116
ASHGA5P005848	0.0055222	0.0343796	4.24036	up	protein_coding	NM_006704	CCDS9436.1	SUGT1	RefSeq	1705	chr13	+	53226830	53262433	AGAAAAAGAGTTGTCTGCTTTGGTTAAACTTCCTTCTGGAGAGGATTACAATTTGAAACT	10910	suppressor of G2 allele of SKP1 homolog isoform SGT1A	6.05777	3.97358
ASHGA5P000647	0.00280159	0.0318783	4.23632	up	protein_coding	NM_025228	CCDS1490.2	TRAF3IP3	RefSeq	2267	chr1	+	209929393	209955668	AAGAAGACTTTGCAGCTCCAGGCCAAGGAAAAGGAGTGCAGAGAACTGCATTCAGAATTA	80342	TRAF3-interacting JNK-activating modulator	5.73819	3.65538
ASHGA5P010818	0.00777574	0.0386796	4.23603	up	protein_coding	NM_021243	CCDS43509.1	ABRACL	RefSeq	941	chr6	+	139349818	139364439	GGTTCAAAAAATGCTGATGGAAAGTTAAGCGTGAAATTTGGGGTCCTCTTCCGTGATGAT	58527	costars family protein ABRACL	7.6052	5.52249
ASHGA5P010487	0.00588708	0.0347605	4.23407	up	protein_coding	NM_001010986	CCDS35410.1	ATP11C	RefSeq	6023	chrX	-	138808504	138914447	AAGTGCCAGGAATCCGAATCTTGAACTGCCTATGTTATTGTCCTACAAGCATACTGACAG	286410	probable phospholipid-transporting ATPase IG isoform b	6.21264	4.1306
ASHGA5P014738	0.00477149	0.0338278	4.21598	up	protein_coding	NM_152132	CCDS45113.1	PSMA3	RefSeq	993	chr14	+	58711522	58738727	ATGTGCATGCATATACACTCTACAGTGCTGTTAGACCTTTTGGCTGCAGTGTGAATGACG	5684	proteasome subunit alpha type-3 isoform 2	6.2621	4.18623
ASHGA5P002035	0.00644756	0.0355515	4.21597	up	protein_coding	NM_018466	CCDS14559.1	ALG13	RefSeq	2993	chrX	+	110924345	110933623	CAGTCTGCAAAAAATCGAGAGCCTTGGTTACAACCGACTTATCCTGCAAATTGGTAGAGG	79868	UDP-N-acetylglucosamine transferase subunit ALG13 homolog isoform 2	5.79056	3.71469
ASHGA5P004350	0.00399027	0.0330479	4.21361	up	protein_coding	NM_002796	CCDS996.1	PSMB4	RefSeq	925	chr1	+	151372040	151374412	ATACTTGGCTCAGCCTCTGCTGCGAGAAGTTCTGGAGAAGCAGCCAGTGCTAAGCCAGAC	5692	proteasome subunit beta type-4	6.42451	4.34945
ASHGA5P054593	0.0034234	0.0328172	4.20731	up	protein_coding	NM_001195305		BBIP1	RefSeq	2226	chr10	-	112658487	112679124	CCAACAACTCAGATATGGCAGAAGTGAAGTCAATGTTCCGGGAAGTTCTTCCAAAGCAAG	92482	BBSome-interacting protein 1 isoform 2	5.90582	3.83292
ASHGA5P052610	0.00518826	0.0340108	4.20233	up	protein_coding	ENST00000359303	CCDS4638.1	HIST1H3J	GENCODE	478	chr6	-	27858092	27858570	GTGAGATCCGCCGTTATCAGAAGTCGACTGAGCTGCTCATCCGCAAACTGCCATTTCAGC	8356	"histone cluster 1, H3j [Source:HGNC Symbol;Acc:4774]"	6.30228	4.23109
ASHGA5P038165	0.00596906	0.0347809	4.20156	up	protein_coding	ENST00000322716	CCDS46790.1	EPM2AIP1	GENCODE	7439	chr3	-	37027356	37034795	ACAACTTTTCTATTGCAACTTGCCTAGGGACTTTGGTTTAGATCATAGGTTGGCCATGAT	9852	EPM2A (laforin) interacting protein 1 [Source:HGNC Symbol;Acc:19735]	5.66322	3.5923
ASHGA5P034234	0.00135636	0.0271992	4.19212	up	protein_coding	NM_001033719		ZNF404	RefSeq	1868	chr19	-	44376514	44384288	ACTCTTAATGTAATGAGAGGGAAAGCCTTTAGCCATGGCACATTTTTACTGTTGTCACTA	342908	zinc finger protein 404	6.23863	4.17095
ASHGA5P049454	0.000364801	0.0197382	4.18608	up	protein_coding	NM_032731	CCDS11077.1	TXNDC17	RefSeq	2075	chr17	+	6544221	6547861	CAGCACAATGGCAAGACCATTTTCGCCTACTTTACGGGTTCTAAGGACGCCGGGGGGAAA	84817	thioredoxin domain-containing protein 17	10.8283	8.76272
ASHGA5P010777	0.00308338	0.0323215	4.18221	up	protein_coding	NM_015984	CCDS1378.1	UCHL5	RefSeq	5108	chr1	-	192981495	193028523	TTAGCAGAACACCAGCAGTTAATACCACTAGTAGAAAAGGCAAAAGAAAAACAGAACGCA	51377	ubiquitin carboxyl-terminal hydrolase isozyme L5 isoform 1	5.73486	3.6706
ASHGA5P007477	0.00449702	0.0335929	4.17581	up	protein_coding	NM_001006607	CCDS42353.1	LRRC37A2	RefSeq	5175	chr17	+	44590075	44633014	GGAGAGTCAGGATGGACTTTCCTCATTTGGACAGCCGCTCTGGTTTAAAGATATGTACAA	474170	leucine-rich repeat-containing protein 37A2 precursor	6.80549	4.74343
ASHGA5P012437	0.00462853	0.0338278	4.17556	up	protein_coding	NM_024120	CCDS13118.1	NDUFAF5	RefSeq	2311	chr20	+	13765671	13799067	GATTTACAAGGTATGGGTGAGAGTAACTGTGCTTGGAATAGAAAAGCCCTGCTGCATCGA	79133	NADH dehydrogenase [ubiquinone] 1 alpha subcomplex assembly factor 5 isoform 1	5.79278	3.73081
ASHGA5P048609	0.00669372	0.0361553	4.16935	up	protein_coding	NM_001023567	CCDS45211.1	GOLGA8B	RefSeq	4271	chr15	-	34817483	34828222	TTAGACCAAATAATGTGGCTAATAGTGGTATGATTTCTAGCCCGTGGGTTTAAAACTGTA	440270	Golgin subfamily A member 8B	7.10422	5.0444
ASHGA5P027002	0.00199259	0.0299571	4.16498	up	protein_coding	NM_016497	CCDS8547.1	MRPL51	RefSeq	690	chr12	-	6601315	6602471	TGTGCTGTTGAAGGGGGGAGACTAGAGAAATGGCAGGGAACCTCTTATCCGGGGCAGGTA	51258	"39S ribosomal protein L51, mitochondrial"	7.32653	5.26823
ASHGA5P010706	0.00384244	0.0329783	4.16455	up	protein_coding	NM_001042552	CCDS31019.1	TATDN3	RefSeq	2588	chr1	+	212965169	212990167	AGAAAAACAGGTACGGAATGAGCCCTGGAACATTTCTATTTCAGCAGAATATATTGCCCA	128387	putative deoxyribonuclease TATDN3 isoform 1	5.59679	3.53863
ASHGA5P005618	0.0255941	0.0752208	4.1517	up	protein_coding	NM_001335	CCDS8117.1	CTSW	RefSeq	1327	chr11	+	65647283	65651212	GGGAGAGAAGGGCTATTTCCGGCTGCACCGAGGGAGCAATACCTGTGGCATCACCAAGTT	1521	cathepsin W preproprotein	5.932	3.8783
ASHGA5P006269	0.0140798	0.0526353	4.14802	up	protein_coding	NM_182491	CCDS5323.1	ZFAND2A	RefSeq	907	chr7	-	1192542	1199855	ATAAGTGTCCGTTTGCATTCCAGAAGGATGTTCACGTCCCAGTATGCCCACTCTGTAATA	90637	AN1-type zinc finger protein 2A	6.66797	4.61555
ASHGA5P017726	0.00562057	0.034492	4.1448	up	protein_coding	NM_001013438	CCDS46965.1	FXR1	RefSeq	8475	chr3	+	180630233	180700539	AATGGGCTAGGCAAAAGATGTGATTGAAGAGCATGGTCCTTCAGAAAAGGCAATAAACGG	8087	fragile X mental retardation syndrome-related protein 1 isoform b	6.11647	4.06517
ASHGA5P011250	0.0109442	0.0461268	4.14076	up	protein_coding	NM_016040	CCDS743.1	TMED5	RefSeq	6083	chr1	-	93615298	93646246	AGACATCCTGGAATCCATCAACAGCATCAAGTCCAGACTAAGCAAAAGTGGGCACATACA	50999	transmembrane emp24 domain-containing protein 5 isoform 1 precursor	5.64493	3.59504
ASHGA5P003046	0.0134403	0.0515499	4.13613	up	protein_coding	ENST00000264265	CCDS3183.1	LXN	GENCODE	1116	chr3	-	158384202	158390482	TATAGCATCTCAGGAGATTATTCCCTGGCAAATGCAAGTTCTCTGGCATCCACAATACGG	56925	latexin [Source:HGNC Symbol;Acc:13347]	6.7795	4.73122
ASHGA5P050968	0.00764243	0.0384462	4.13345	up	protein_coding	NM_152838	CCDS13261.1	RBM12	RefSeq	6692	chr20	-	34236846	34252878	CTTGTATTAGGGTAGCCATTCACATCATTTTTTATAGGGTAGATCTTCATATTGCTGTGA	10137	RNA-binding protein 12	5.62491	3.57757
ASHGA5P003435	0.0252002	0.0744101	4.13313	up	protein_coding	NM_003366	CCDS10601.1	UQCRC2	RefSeq	1674	chr16	+	21964608	21994668	TTCCAACACAGATGTCCAAGCTGCCAAGAACAAGCTGAAAGCTGGATACCTAATGTCAGT	7385	"cytochrome b-c1 complex subunit 2, mitochondrial precursor"	6.73436	4.68712
ASHGA5P003270	0.00449997	0.0335929	4.12994	up	protein_coding	NM_003919	CCDS5637.1	SGCE	RefSeq	1709	chr7	-	94214535	94285521	ACAGCAGACTACAGGTAAATGGTATCCCTGAAGAAAGAAAACTGACTGAAGCAATGAATT	8910	epsilon-sarcoglycan isoform 2	5.36511	3.31899
ASHGA5P001281	0.0415417	0.103849	4.11972	up	protein_coding	ENST00000393622	CCDS45696.1	HDAC5	GENCODE	5324	chr17	-	42154120	42201014	CAGTGTAGAGCTGCAGCCCTTGGATGAGGCAGTCTTGCAGCAAAAGCCCAACATCAACGC	10014	histone deacetylase 5 [Source:HGNC Symbol;Acc:14068]	6.18263	4.14008
ASHGA5P012722	0.00448865	0.0335929	4.11627	up	protein_coding	NM_052818	CCDS9345.2	N4BP2L1	RefSeq	3051	chr13	-	32974859	33002315	AGTTAGCAAGAAGAAACATTCATGGTGTCTCAAGAGAAAAAATCCACCGAATGAAAGAAC	90634	NEDD4-binding protein 2-like 1 isoform 1	5.80925	3.76791
ASHGA5P011344	0.0238227	0.0718697	4.11299	up	protein_coding	NM_002792	CCDS13489.1	PSMA7	RefSeq	984	chr20	-	60711782	60718514	TGGAGTACATCACCCGCTACATCGCCAGTCTGAAGCAGCGTTATACGCAGAGCAATGGGC	5688	proteasome subunit alpha type-7	8.28399	6.24381
ASHGA5P004138	0.00572164	0.0346119	4.11234	up	protein_coding	NM_006111	CCDS11939.1	ACAA2	RefSeq	1952	chr18	-	47309873	47340251	TCAAGAATTACTGCACACCTGGTTCACGAATTAAGGCGTCGAGGTGGAAAATATGCCGTT	10449	"3-ketoacyl-CoA thiolase, mitochondrial"	6.51358	4.47363
ASHGA5P028421	0.00573957	0.0346586	4.11117	up	protein_coding	NM_001042414	CCDS41870.1	PSPC1	RefSeq	2031	chr13	-	20277008	20357159	AGGCCCTAATAAGCGTCGTAGATATTAAACATTCGTTCATTCCTGGCTATCTAGAAAAAA	55269	paraspeckle component 1	6.47858	4.43903
ASHGA5P052902	0.004167	0.0330909	4.11096	up	protein_coding	NM_000636	CCDS5265.1	SOD2	RefSeq	1593	chr6	-	160102754	160114353	TGAAAGATACATGGCTTGCAAAAAGTAAACCACGATCGTTATGCTGAGTATGTTAAGCTC	6648	"superoxide dismutase [Mn], mitochondrial isoform A precursor"	8.65227	6.61279
ASHGA5P012806	0.00547399	0.0343796	4.10828	up	protein_coding	NM_015932	CCDS9331.1	POMP	RefSeq	1477	chr13	+	29233140	29253093	GCGGAAGATGAATGCCAGAGGACTTGGATCTGAGCTAAAGGACAGTATTCCAGTTACTGA	51371	proteasome maturation protein	6.17734	4.1388
ASHGA5P005255	0.00228548	0.0309205	4.10109	up	protein_coding	NM_004513	CCDS10317.1	IL16	RefSeq	6077	chr15	+	81589253	81605104	ATTTTCAAAGGAGCAGCCTCAGAACAAAGTGAGACAGTCCAGCCTGGAGATGAAATCTTA	3603	pro-interleukin-16 isoform 1	5.89228	3.85627
ASHGA5P014013	0.00325342	0.0326774	4.09747	up	protein_coding	NM_004671	CCDS32824.1	PIAS2	RefSeq	4427	chr18	-	44390022	44497495	TCAAGCATGTCATCAGATTTGCCAGGTTTGGATTTTCTTTCCCTTATTCCAGTTGATCCC	9063	E3 SUMO-protein ligase PIAS2 isoform beta	5.14735	3.11261
ASHGA5P054685	0.0350239	0.0926724	4.09079	up	protein_coding	NM_000518	CCDS7753.1	HBB	RefSeq	626	chr11	-	5246695	5248301	TCACCTGGACAACCTCAAGGGCACCTTTGCCACACTGAGTGAGCTGCACTGTGACAAGCT	3043	hemoglobin subunit beta	6.80723	4.77485
ASHGA5P055285	0.0148854	0.0541494	4.08577	up	protein_coding	NM_004054	CCDS8588.1	C3AR1	RefSeq	1985	chr12	-	8210918	8218955	AAATAGTACAACTGTGTGAAAATGTGGAGCAGCCAACAAGCAGGGGCTCTTAGGCAATCA	719	C3a anaphylatoxin chemotactic receptor	6.22302	4.19241
ASHGA5P007365	0.00810862	0.0394661	4.0849	up	protein_coding	NM_004261		SEP15	RefSeq	1851	chr1	-	87328127	87380107	GCAAATCAAGTATGTCCGTGGTTCAGACCCTGTATTAAAGCTTTTGGACGACAATGGGAA	9403	15 kDa selenoprotein isoform 1 precursor	6.9149	4.8846
ASHGA5P025168	0.0175086	0.0593939	4.07698	up	protein_coding	NM_000442		PECAM1	RefSeq	6831	chr17	-	62396776	62407083	CAGATACTCTAGAACGGAAGGCTCCCTTGATGGAACTTAGACAGCAAGGCCAGATGCACA	5175	platelet endothelial cell adhesion molecule precursor	5.95373	3.92623
ASHGA5P003333	0.00499902	0.0338278	4.06703	up	protein_coding	NM_033114	CCDS8740.1	ZCRB1	RefSeq	1844	chr12	-	42705887	42719932	TTTTTCCCTGACAAACAATGACTTGTACCGGATATTTTCCAAGTATGGCAAAGTTGTAAA	85437	zinc finger CCHC-type and RNA-binding motif-containing protein 1	6.52229	4.49832
ASHGA5P002507	0.000713332	0.023569	4.06083	up	protein_coding	NM_021199	CCDS10127.1	SQRDL	RefSeq	1682	chr15	+	45927255	45983479	ATGAAAGCTGACCTGATGCCTTTCCTGTATTGGAATATGATGCTAAGGGGTTACTGGGGA	58472	"sulfide:quinone oxidoreductase, mitochondrial"	9.01376	6.99199
ASHGA5P046796	0.00435617	0.0334484	4.05836	up	protein_coding	NM_172247	CCDS35192.1	CSF2RA	RefSeq	1590	chrY	+	1351570	1378828	CCTCCGCGACACGGGGGAACTGTTTTCTTGATGATGCTGTGAACCTTTATATCATTTTCT	1438	granulocyte-macrophage colony-stimulating factor receptor subunit alpha isoform c precursor	6.51615	4.49525
ASHGA5P007904	0.00844062	0.0401235	4.04609	up	protein_coding	NM_000904	CCDS4481.1	NQO2	RefSeq	1139	chr6	+	3000066	3019994	TCTACGATTCCGGTTTGCTCCAGGGTAAACTAGCGCTCCTTTCCGTAACCACGGGAGGCA	4835	ribosyldihydronicotinamide dehydrogenase [quinone]	5.45929	3.44277
ASHGA5P053684	0.00330563	0.0326774	4.04412	up	protein_coding	NM_001001790	CCDS43803.1	TOMM5	RefSeq	773	chr9	-	37588411	37592636	CAGAGCCGCGATGTTCCGGATTGAGGGCCTCGCGCCGAAGCTGGACCCGGAGGAGATGAA	401505	mitochondrial import receptor subunit TOM5 homolog isoform 1	5.92318	3.90736
ASHGA5P034335	0.026394	0.0768435	4.04077	up	protein_coding	NM_181985	CCDS12889.1	LILRA5	RefSeq	1329	chr19	-	54818352	54824409	TCTCATCCGCATGGGCATGGCCGGCTTGATCCTGGTGGTCCTTGGGATTCTGATATTTCA	353514	leukocyte immunoglobulin-like receptor subfamily A member 5 isoform 2	6.83799	4.82336
ASHGA5P009596	0.00844916	0.04013	4.03035	up	protein_coding	NM_001002032	CCDS32729.1	HN1	RefSeq	1582	chr17	-	73131343	73150774	ACTCCTCTGAAGCAAGCTCCGGAGACTTCTTAGATCTGAAGAAAATGTGGACACAGACTT	51155	hematological and neurological expressed 1 protein isoform 2	5.93602	3.92512
ASHGA5P049485	0.00280623	0.0318783	4.02538	up	protein_coding	NM_001177802	CCDS54087.1	RANGRF	RefSeq	1166	chr17	+	8191968	8193409	ATCCCCTTAGGTAGCAAAGGACGTGACACTTCATCAGGCCTTGCTGAGGCTGCCCCAGTA	29098	ran guanine nucleotide release factor isoform C	5.18078	3.17166
ASHGA5P010943	0.00138771	0.0274621	4.02367	up	protein_coding	NM_014017	CCDS1128.1	LAMTOR2	RefSeq	699	chr1	+	156024516	156028301	TTAATGAAGACAATCTCAAATTCATCCTCATGGACTGCATGGAGGGCCGTGTAGCCATCA	28956	ragulator complex protein LAMTOR2 isoform 1	6.7758	4.76729
ASHGA5P049634	0.00778707	0.0386796	4.01816	up	protein_coding	ENST00000417170	CCDS45656.1	TADA2A	GENCODE	1304	chr17	+	35767311	35825757	AGCCATGCATGTAGGTGGTTTTTGAGCCTTGAGCAGTATTTGTGTGTGTATATTTATATA	6871	transcriptional adaptor 2A [Source:HGNC Symbol;Acc:11531]	5.783	3.77646
ASHGA5P010274	0.00199969	0.0299571	4.01786	up	protein_coding	NM_021077	CCDS10332.1	NMB	RefSeq	1046	chr15	-	85198359	85201802	ACCCCAAATCCAGTACAGGAGGCTGCTGGTACAAATACTGCAGAAATGACACCAATAATG	4828	neuromedin-B isoform 1 preproprotein	5.8359	3.82947
ASHGA5P010730	0.0103096	0.0445392	4.01757	up	protein_coding	NM_032960	CCDS31001.1	MAPKAPK2	RefSeq	2997	chr1	+	206858364	206907630	GGATGTCAAGGAGGAGATGACCAGTGCCTTGGCCACAATGCGCGTTGACTACGAGCAGAT	9261	MAP kinase-activated protein kinase 2 isoform 2	7.13851	5.13219
ASHGA5P011743	0.00618407	0.0352286	4.01359	up	protein_coding	NM_004096	CCDS7303.1	EIF4EBP2	RefSeq	7531	chr10	+	72163860	72188374	AACAACTTGAACAATCACGACAGGAAACATGCAGTTGGGGATGATGCTCAGTTCGAGATG	1979	eukaryotic translation initiation factor 4E-binding protein 2	5.43142	3.42653
ASHGA5P038128	0.00484611	0.0338278	4.01323	up	protein_coding	NM_206831	CCDS2629.1	DPH3	RefSeq	4065	chr3	-	16298567	16306496	GGGGAAGACGTGGCAACGTGTCCTAGCTGCTCTCTCATTATAAAAGTGATTTATGACAAA	285381	DPH3 homolog isoform 1	5.86434	3.85957
ASHGA5P012575	0.00396038	0.0329783	4.01104	up	protein_coding	NM_013238	CCDS9388.1	DNAJC15	RefSeq	2792	chr13	+	43597361	43683306	TTTAGGTGTAAGCCCATCTGCTGGCAAGGCTAAGATTAGAACAGCTCATAGGAGAGTCAT	29103	dnaJ homolog subfamily C member 15	6.76088	4.7569
ASHGA5P021410	0.00705233	0.0369658	4.0086	up	protein_coding	NM_001146169	CCDS53476.1	TATDN3	RefSeq	2575	chr1	+	212965169	212990167	CAGAAAAACAGCAGAATATATTGCCCAGGTGAAAGGGATCTCAGTGGAAGAAGTTATAGA	128387	putative deoxyribonuclease TATDN3 isoform 3	5.51205	3.50895
ASHGA5P027099	0.00415477	0.0330909	4.00552	up	protein_coding	NM_005274	CCDS696.1	GNG5	RefSeq	823	chr1	-	84964005	84972262	GCCGCTATGAAGAAAGTGGTTCAACAGCTCCGGCTGGAGGCCGGACTCAACCGCGTAAAA	2787	guanine nucleotide-binding protein G(I)/G(S)/G(O) subunit gamma-5 precursor	7.16055	5.15855
ASHGA5P017048	0.0173126	0.0590043	4.00158	up	protein_coding	NM_001100595	CCDS45748.1	SKA2	RefSeq	2988	chr17	-	57187307	57232800	AGCAAGTGAGCTGTCACCACTGACTAAAGAAGAGAAAACTGCGGCAGAGCAATTCAAATT	348235	spindle and kinetochore-associated protein 2 isoform 2	6.28092	4.28035
ASHGA5P012474	0.00372465	0.0329783	3.99225	up	protein_coding	NM_174923	CCDS6583.1	CCDC107	RefSeq	1272	chr9	+	35658286	35661500	CCCCTTTTTGAGCGTGTGACTACTCTGGCTGGAGCCCAGCAGGAGCTTCTGAACATGAAG	203260	coiled-coil domain-containing protein 107 isoform A precursor	6.14974	4.15254
ASHGA5P056107	0.0146547	0.0536374	3.98911	up	protein_coding	NM_004755	CCDS9893.1	RPS6KA5	RefSeq	3883	chr14	-	91337166	91526993	AGTAGCTTAGGCATGGTAGGAGTGTATCAGTGATCCATTGCACCTTTATTCCCTCAGCAT	9252	ribosomal protein S6 kinase alpha-5 isoform a	5.60263	3.60656
ASHGA5P001972	0.0284011	0.0806586	3.98769	up	protein_coding	NM_001344	CCDS9571.1	DAD1	RefSeq	711	chr14	-	23033806	23058143	TTCATCCTAGCGGTTTGCCTGAGAATACAGATCAACCCACAGAACAAAGCGGATTTCCAA	1603	dolichyl-diphosphooligosaccharide--protein glycosyltransferase subunit DAD1	6.72504	4.72949
ASHGA5P007310	0.00607466	0.0348634	3.97881	up	protein_coding	NM_001025249	CCDS45256.1	DUT	RefSeq	1830	chr15	+	48623620	48635570	ACCTGTACAGTGCCTATGATTACACAATACCACCTATGGAGAAAGCTGTTGTGAAAACGG	1854	"deoxyuridine 5'-triphosphate nucleotidohydrolase, mitochondrial isoform 3"	5.47629	3.48395
ASHGA5P001305	0.00524381	0.0340745	3.97595	up	protein_coding	NM_001165416	CCDS53611.1	LDHA	RefSeq	2102	chr11	+	18415935	18429765	TGGTTGAGAGGGTCTTTACGGAATAAAGGATGATGTCTTCCTTAGTGTTCCTTGCATTTT	3939	L-lactate dehydrogenase A chain isoform 5	5.7357	3.7444
ASHGA5P004775	0.0450699	0.109971	3.9666	up	protein_coding	NM_024632	CCDS4326.1	SAP30L	RefSeq	6243	chr5	+	153825516	153840613	CATTCCTGAGGTTGATCTGTTCCAGCTGCAGGTGAACACCCTACGACGTTATAAACGACA	79685	histone deacetylase complex subunit SAP30L isoform 1	6.50817	4.52026
ASHGA5P034403	0.0115016	0.0473208	3.95793	up	protein_coding	NM_172251	CCDS12111.1	MRPL54	RefSeq	628	chr19	+	3762664	3767563	AACAGAACATCTGGCGCCACAACCGGCTGAGCAAGAACAAGAGGTTGTAGCATGGAGGGC	116541	"39S ribosomal protein L54, mitochondrial"	6.0399	4.05515
ASHGA5P014562	0.00930135	0.0422432	3.95053	up	protein_coding	NM_001130716	CCDS3601.1	PLAC8	RefSeq	1442	chr4	-	84011210	84031012	AGAGCGGGCAGAGAAGTCCACTGCTTTTAAGGCCCTGCACTGAAAATGCAAGCTCAGGCG	51316	placenta-specific gene 8 protein	5.9676	3.98555
ASHGA5P050060	0.0237667	0.0717792	3.9504	up	protein_coding	NM_015414	CCDS12147.1	RPL36	RefSeq	557	chr19	+	5690345	5691678	CTGTCCGCAGCCATGGCCCTACGCTACCCTATGGCCGTGGGCCTCAACAAGGGCCACAAA	25873	60S ribosomal protein L36	8.40614	6.42414
ASHGA5P006712	0.003539	0.0328487	3.93694	up	protein_coding	NM_001032363	CCDS30620.1	MINOS1	RefSeq	3726	chr1	+	19923470	19956315	GTCGTGAAGATAGGTACTGGTTTTGGATTAGGAATTGTTTTCTCACTTACCTTCTTTAAA	440574	mitochondrial inner membrane organizing system protein 1 isoform a	7.39396	5.41689
ASHGA5P005822	0.00377518	0.0329783	3.93552	up	protein_coding	NM_001168347	CCDS55119.1	NSUN5	RefSeq	2371	chr7	-	72716513	72722864	TAATTGAACGGGTCGAGGTGCCAAGCCTCACAGGCCAAAGCATCAGCACCAGAACGCACA	55695	putative methyltransferase NSUN5 isoform 3	5.93174	3.95519
ASHGA5P029435	0.00592026	0.0347807	3.93365	up	protein_coding	NM_001029991	CCDS41913.1	METTL17	RefSeq	1802	chr14	+	21457964	21465194	TGACCAAAATCAGTGGGATGTGGCAGGAAGCTGCAGCCCACGCCAGCATCTGTTTCCACA	64745	"methyltransferase-like protein 17, mitochondrial isoform 1 precursor"	5.73823	3.76236
ASHGA5P042818	0.000611697	0.0230282	3.92689	up	protein_coding	NM_001035230	CCDS41437.1	RABGAP1L	RefSeq	815	chr1	+	174844655	174927327	AAGATGATGGAAGAAATCTCCATTATGGTAGCCTATGACGCCCATGTTTTCAGCCAGCTG	9910	rab GTPase-activating protein 1-like isoform B	5.99599	4.0226
ASHGA5P034928	0.0310428	0.0854915	3.92571	up	protein_coding	NM_001013663	CCDS33156.1	PTRHD1	RefSeq	602	chr2	-	25013135	25016251	ATACTTGGTGTTACGAAAGGATCTATCACAAGCTCCGTTCTCCTGGCCGGCGGGCGCACT	391356	putative peptidyl-tRNA hydrolase PTRHD1	5.71161	3.73866
ASHGA5P039201	0.00893343	0.0413283	3.92524	up	protein_coding	NM_002808	CCDS3258.1	PSMD2	RefSeq	2990	chr3	+	184017021	184026840	TTTGTTATCCTTCGGAAGAACCCCAATTATGATCTCTAAGTGACCACCAGGGGCTCTGAA	5708	26S proteasome non-ATPase regulatory subunit 2	8.92915	6.95637
ASHGA5P006478	0.00203807	0.0300663	3.92162	up	protein_coding	NM_006755	CCDS7712.1	TALDO1	RefSeq	1319	chr11	+	747431	765024	GCCAAGGCGGCCCAAGCCAGTGACCTGGAAAAAATCCACCTGGATGAGAAGTCTTTCCGT	6888	transaldolase	7.2035	5.23205
ASHGA5P006109	0.002861	0.0318783	3.91892	up	protein_coding	NM_031369	CCDS3591.1	HNRNPD	RefSeq	2200	chr4	-	83274466	83295149	AACAACTACTATGGATATGGTGATTATAGCAACCAGCAGAGTGGTTATGGGAAGGTATCC	3184	heterogeneous nuclear ribonucleoprotein D0 isoform b	6.11575	4.1453
ASHGA5P000883	0.00652531	0.0357192	3.91874	up	protein_coding	NM_004765	CCDS10693.1	BCL7C	RefSeq	877	chr16	-	30899115	30905399	AACTGCTGGAAGCTGAGGCCCCCGAAGCTTACCCTGTCTTTGAGCCAGTGCCACCTGTCC	9274	B-cell CLL/lymphoma 7 protein family member C	7.49671	5.52632
ASHGA5P052990	0.00718807	0.0373406	3.91433	up	protein_coding	NM_001002926	CCDS34606.1	TWISTNB	RefSeq	3892	chr7	-	19735084	19748660	AGATGACACTCCAATGGAAGAGTCAGCCCTGCAGAATACTAATAATGCGAATGGCATCTG	221830	DNA-directed RNA polymerase I subunit RPA43	6.18059	4.21182
ASHGA5P046735	0.0142561	0.053022	3.90187	up	protein_coding	NM_001636	CCDS14114.1	SLC25A6	RefSeq	1502	chrY	-	1455044	1461039	CGGCCGTGGCCGGCGTGGTGTCCTACCCCTTCGACACGGTGCGGCGGCGCATGATGATGC	293	ADP/ATP translocase 3	7.11712	5.15296
ASHGA5P055345	0.00548805	0.0343796	3.89969	up	protein_coding	NM_139241	CCDS8727.1	FGD4	RefSeq	8312	chr12	+	32655040	32798984	ATCATCCTGAACCTAAGAAAAAATCAGAATGCTGAACTCCTCCAGGACCAGCCATGGTGT	121512	"FYVE, RhoGEF and PH domain-containing protein 4"	9.91809	7.95473
ASHGA5P050699	0.0021963	0.0308178	3.89558	up	protein_coding	NM_014168	CCDS33320.1	METTL5	RefSeq	956	chr2	-	170668267	170681353	TTCTCCGCAGATCCTGTGCCTTCAAACCCTACGAGTCCATACTTTAAAACAAAATGAAGA	29081	methyltransferase-like protein 5	6.40413	4.44229
ASHGA5P053038	0.00611898	0.0350191	3.89477	up	protein_coding	NM_015483	CCDS34614.1	KBTBD2	RefSeq	3710	chr7	-	32907777	32931468	GTACGATTGTTGAGTTTTGCTGATCTCTTCAGTTGTGAGGAATTAAAACAGAGTGCTAAA	25948	kelch repeat and BTB domain-containing protein 2	5.0684	3.10686
ASHGA5P003628	0.00431002	0.0334484	3.89306	up	protein_coding	NM_016058	CCDS1927.1	TPRKB	RefSeq	752	chr2	-	73956956	73964517	TCCTACAGTGATTGTTGATCCATTTCAGATACTTGTGGCAGCAAACAAAGCAGTTCACCT	51002	TP53RK-binding protein	6.44222	4.48131
ASHGA5P007799	0.00587961	0.0347584	3.89117	up	protein_coding	ENST00000337018	CCDS12392.1	SUGP2	GENCODE	3657	chr19	-	19101696	19144380	CAACAAATAGTTCCAGGGTCACCCCCGAGAGGACAACAGGCATCTGGAAGTGCTCTCTCG	10147	SURP and G patch domain containing 2 [Source:HGNC Symbol;Acc:18641]	8.50063	6.54042
ASHGA5P055727	0.0047242	0.0338278	3.89107	up	protein_coding	NM_001039650	CCDS31942.1	ZMYM5	RefSeq	1535	chr13	-	20411592	20437776	GTAGTAAATTAGCAGAGGTCTGGATTTTTATACCTAAGTTGTTGTTTAGGCTAACAGTGA	9205	zinc finger MYM-type protein 5 isoform 1	5.45976	3.4996
ASHGA5P002024	0.00619297	0.0352445	3.88924	up	protein_coding	ENST00000407724	CCDS48208.1	CYorf15A	GENCODE	864	chrY	+	21729234	21752308	GCTCTCTGTAAGAAATATGCTGATCTTGGAAATTCACCTCTTCTATAGAAGAGTTTGTTT		Putative gamma-taxilin 2 [Source:UniProtKB/Swiss-Prot;Acc:Q9BZA5]	6.02034	4.06086
ASHGA5P020064	0.00520936	0.0340396	3.88598	up	protein_coding	NM_001130929	CCDS55168.1	C7orf73	RefSeq	2515	chr7	+	135347220	135361160	CTGGCTCAGAACTATGATATACCAAACCTGGCTAAAAAACTTGAAGAAATTAAAAAGGAC	647087	uncharacterized protein C7orf73 precursor	7.1632	5.20492
ASHGA5P001228	0.00977536	0.0434309	3.88516	up	protein_coding	NM_006555	CCDS5482.1	YKT6	RefSeq	2783	chr7	+	44240577	44253893	AAAGCCTTCTATAAAACTGCCCGGAAACAAAACTCATGCTGTGCCATCATGTGATGCAGC	10652	synaptobrevin homolog YKT6	4.89649	2.93851
ASHGA5P015763	0.0045999	0.0338278	3.88509	up	protein_coding	NM_001195307		BBIP1	RefSeq	2136	chr10	-	112658487	112679124	GAACTTTCAGGGCCACTGTTTGTGGAAGATATAATGACAATGGTGCTGTGTAAACCCAAA	92482	BBSome-interacting protein 1 isoform 3	5.81873	3.86078
ASHGA5P012746	0.00248715	0.0313776	3.8837	up	protein_coding	NM_001145646	CCDS45276.1	APH1B	RefSeq	4082	chr15	+	63569748	63601325	CTGGCCTATGCTTTCATGACGCTGGTCATTATCTTGCTGCATGTATTCTGGGGCATTGTA	83464	gamma-secretase subunit APH-1B isoform 2	6.47919	4.52175
ASHGA5P012467	0.0403361	0.101961	3.87799	up	protein_coding	NM_016299	CCDS7103.1	HSPA14	RefSeq	1810	chr10	+	14880260	14913740	TATCAACAAGGTTGTCCTTTGTGGAGGGTCTTCTCGAATCCCAAAGCTACAGCAACTGAT	51182	heat shock 70 kDa protein 14 isoform 1	5.27452	3.31921
ASHGA5P033955	0.00225553	0.0309205	3.87725	up	protein_coding	NM_012458	CCDS12089.1	TIMM13	RefSeq	1977	chr19	-	2425621	2427875	ATGACGGACAAGTGTTTCCGGAAGTGTATAGGGAAACCTGGGGGCTCCCTGGACAACTCC	26517	mitochondrial import inner membrane translocase subunit Tim13	7.43363	5.4786
ASHGA5P003042	0.00409916	0.0330909	3.86544	up	protein_coding	NM_005783	CCDS2044.1	TXNDC9	RefSeq	1556	chr2	-	99935486	99952860	CTTCTGACATTCTTAATTACAGTGGAAATTTAATGGAGCCACCATTTCAGAACCAAAAGA	10190	thioredoxin domain-containing protein 9	5.57848	3.62785
ASHGA5P010817	0.0265967	0.0772349	3.86416	up	protein_coding	NM_016217	CCDS5194.1	HECA	RefSeq	5621	chr6	+	139456248	139501946	AGATCGAATATGATGTTCCTTGTCACCTTCAAGGGAGACTCATGCATCTGTATGCCGTGT	51696	headcase protein homolog	6.34182	4.39166
ASHGA5P009898	0.0103054	0.0445392	3.86187	up	protein_coding	NM_004635	CCDS2832.1	MAPKAPK3	RefSeq	2553	chr3	+	50654561	50686728	AAAGACCACTGGGACGAAGTCAAGGAGGAGATGACCAGTGCCTTGGCCACTATGCGGGTA	7867	MAP kinase-activated protein kinase 3	6.98944	5.04014
ASHGA5P010164	0.00379863	0.0329783	3.85859	up	protein_coding	NM_001033574	CCDS32714.1	AMZ2	RefSeq	1806	chr17	+	66244144	66253305	CAGTCCATTGGGGACATCCTGAAGTTCTTGAAAAAGAAGAAACCTGAAGATGCCTTCTGT	51321	archaemetzincin-2 isoform 2	5.20865	3.26058
ASHGA5P010366	0.0156977	0.055865	3.85706	up	protein_coding	NM_007315	CCDS2309.1	STAT1	RefSeq	4326	chr2	-	191833761	191878976	AAGACTGAGTTGATTTCTGTGTCTGAAGTTCACCCTTCTAGACTTCAGACCACAGACAAC	6772	signal transducer and activator of transcription 1-alpha/beta isoform alpha	5.23618	3.28868
ASHGA5P050688	0.00296775	0.0320046	3.85099	up	protein_coding	NM_018103	CCDS726.1	LRRC8D	RefSeq	3782	chr1	+	90287479	90401989	TGGGATTTAAACTAAGATAATATATGCACAGTGATGTGCAGGAACAACTTCCTAGATTGC	55144	leucine-rich repeat-containing protein 8D	5.09237	3.14714
ASHGA5P034333	0.00970267	0.0433134	3.84563	up	protein_coding	NM_006865	CCDS12887.1	LILRA3	RefSeq	1651	chr19	-	54799854	54804265	TAAAATCAAAGCGCCAATCTCATAAGTACCAGGCTGAATTCCCCATGAGTCCTGTGACCT	11026	leukocyte immunoglobulin-like receptor subfamily A member 3 isoform 1 precursor	8.03821	6.09499
ASHGA5P002993	0.00235358	0.03105	3.84245	up	protein_coding	NM_012110	CCDS3493.1	CHIC2	RefSeq	1178	chr4	-	54875957	54930815	CCAGTTATTTGCCTCAGTAAAAGAACACGAAGATCGATTGAGAAGTTATTAGAATGGGAA	26511	cysteine-rich hydrophobic domain 2 protein	4.84978	2.90775
ASHGA5P038341	0.0180585	0.060494	3.8405	up	protein_coding	NM_020654	CCDS2941.2	SENP7	RefSeq	4934	chr3	-	101043117	101232085	TGGCAGCCTAGAATCTTATCAAAATCTAAACCCTCACAAGAGCTGTTATTTATCTGAAAG	57337	sentrin-specific protease 7 isoform 1	5.22998	3.28869
ASHGA5P003842	0.0279139	0.0798401	3.83718	up	protein_coding	NM_139273	CCDS41602.1	CARS	RefSeq	2558	chr11	-	3022151	3078681	GACAAATACTCCAAGTTTGATGAAAATGTAAGCATGGTCTGCCCACACATGACATGGAGG	833	"cysteine--tRNA ligase, cytoplasmic isoform a"	5.8609	3.92085
ASHGA5P006795	0.00732647	0.037674	3.83632	up	protein_coding	NM_024116	CCDS8293.1	TAF1D	RefSeq	1323	chr11	-	93469095	93474703	CTATTGAGGAGTCAACAGCAGAGGATGAGGATGCAACACATCTTGAAGATAACGAATGTG	79101	TATA box-binding protein-associated factor RNA polymerase I subunit D	5.75663	3.81691
ASHGA5P051579	0.00584282	0.0347584	3.83265	up	protein_coding	NM_006407	CCDS2912.1	ARL6IP5	RefSeq	2135	chr3	+	69134089	69155239	ATCGTTGAGACTTCGGAACCTCAAGAACAAACTGGAGAATAAAATGGAAGGAATAGGTTT	10550	PRA1 family protein 3	6.1771	4.23876
ASHGA5P021073	0.00312962	0.0323621	3.8283	up	protein_coding	NM_148170	CCDS31654.1	CTSC	RefSeq	6143	chr11	-	88053980	88070941	AACAAACTGGTTATTAAATAGAGCATCTGTTGAGGGACTCTTTTAAAACCACAGCCATGA	1075	dipeptidyl peptidase 1 isoform b precursor	6.1385	4.2018
ASHGA5P017426	0.0311456	0.0856819	3.82814	up	protein_coding	NM_001142386	CCDS48088.1	PDK3	RefSeq	12795	chrX	+	24483343	24568583	AAGCAAAACAAGACAAGATCAAGACTAATAGAACTTTCTAGAGGACTGAATGCTGTGGTC	5165	"pyruvate dehydrogenase kinase, isozyme 3 isoform 1"	5.26293	3.32629
ASHGA5P049102	0.00500578	0.0338278	3.82791	up	protein_coding	NM_207332	CCDS5955.1	ERICH1	RefSeq	1836	chr8	-	614199	681226	ATATCCTTCCTGAGAAGAGCAGTGACTAAAATGGAATATCTCTTTAAGAACAGCTCCTCT	157697	glutamate-rich protein 1	6.49987	4.56331
ASHGA5P006656	0.00368655	0.0329783	3.81896	up	protein_coding	NM_001099672	CCDS55255.1	C8orf59	RefSeq	963	chr8	-	86126287	86132643	TGCTGTTTCAACAATGGCCAAGAACAAATTAAGAGGGCCGAAGTCCAGGAATGTATTTCA	401466	uncharacterized protein C8orf59	6.60926	4.67608
ASHGA5P051886	0.0303633	0.0841017	3.8182	up	protein_coding	NM_144720	CCDS3385.1	JAKMIP1	RefSeq	2593	chr4	-	6055481	6202318	AGAACTCGAAGTAAGAGACTCTATCTGTTGTAAACTCTCAAACGGAGCAGACATTCTCTT	152789	janus kinase and microtubule-interacting protein 1 isoform 2	5.77434	3.84145
ASHGA5P004514	0.0246215	0.0732939	3.8177	up	protein_coding	NM_201412	CCDS32348.1	LUC7L	RefSeq	1452	chr16	-	238973	279449	ACCGAAGTGCGAAATACAAGTTCTCCAGAGAGCGGGCATCCAGAGAGGAGTCCTGGGAGA	55692	putative RNA-binding protein Luc7-like 1 isoform b	6.443	4.5103
ASHGA5P011167	0.0033804	0.032685	3.81441	up	protein_coding	NM_001191002	CCDS53572.1	GSTO1	RefSeq	918	chr10	+	106014467	106027222	GTTTTCTAAGGTTCTGACTAATAAGAAGACGACCTTCTTTGGTGGCAATTCTATCTCTAT	9446	glutathione S-transferase omega-1 isoform 2	7.13992	5.20846
ASHGA5P005387	0.0283456	0.0805457	3.80721	up	protein_coding	NM_001002033	CCDS45772.1	HN1	RefSeq	1696	chr17	-	73131343	73150774	AACTCCTCTGAAGCAAGCTCCGGAGACTTCTTAGATCTGAAGGGAGAAGGTGATATTCAT	51155	hematological and neurological expressed 1 protein isoform 3	6.12453	4.19579
ASHGA5P001268	0.00737311	0.0377476	3.80642	up	protein_coding	NM_005022	CCDS11061.1	PFN1	RefSeq	847	chr17	-	4848944	4852381	CAACATCACGCCAGCTGAGGTGGGTGTCCTGGTTGGCAAAGACCGGTCAAGTTTTTACGT	5216	profilin-1	5.55942	3.63098
ASHGA5P051928	0.00471272	0.0338278	3.80285	up	protein_coding	NM_001100400	CCDS54759.1	PDS5A	RefSeq	2745	chr4	-	39899590	39979576	CTTGCAAACAAGCAGATATTTGTGTGGTTAGTAAATCATACTTCACACTTTTTCTCTAGC	23244	sister chromatid cohesion protein PDS5 homolog A isoform 3	5.36395	3.43688
ASHGA5P000678	0.00588036	0.0347584	3.80131	up	protein_coding	NM_001102668	CCDS45319.1	PSMA4	RefSeq	1072	chr15	+	78832746	78841563	GGATGTTAGTAAACTCTCTGCTGAAAAAGTGGAAATTGCAACACTAACAAGAGAGAATGG	5685	proteasome subunit alpha type-4 isoform 2	6.21237	4.28587
ASHGA5P008607	0.00906219	0.0416479	3.79851	up	protein_coding	NM_017971	CCDS26.1	MRPL20	RefSeq	749	chr1	-	1337275	1342693	TACCTGAAGAAAAAGAACATGAGGACCCTCTGGATTAATCGAATTACAGCTGCTAGCCAG	55052	"39S ribosomal protein L20, mitochondrial"	6.46615	4.54071
ASHGA5P032985	0.00943341	0.0425098	3.78395	up	protein_coding	NM_000984	CCDS11241.1	RPL23A	RefSeq	979	chr17	+	27046999	27051374	TAACAAGCTGTACAAGAACCCCTTTTATCCCTGGAAGAGGCTGTGTATGAAACCAATGCC	6147	60S ribosomal protein L23a	8.82684	6.90694
ASHGA5P036964	0.00317664	0.0325558	3.77581	up	protein_coding	NM_080820	CCDS13138.1	DTD1	RefSeq	1368	chr20	+	18568555	18744560	AAGACCAGAGCTAAGGGACCTTCTGAATCAAGCAAGGAAAGAAACACTCCCCGAAAAGAA	92675	D-tyrosyl-tRNA(Tyr) deacylase 1	5.66405	3.74727
ASHGA5P004429	0.0116479	0.0476784	3.77005	up	protein_coding	NM_014297	CCDS12622.1	ETHE1	RefSeq	978	chr19	-	44010870	44031396	TCAAAATCATGGGCAACCTGAACTTGCCTAAACCTCAGCAGATAGACTTTGCTGTTCCAG	23474	"protein ETHE1, mitochondrial"	6.18423	4.26965
ASHGA5P008987	0.00657879	0.0358577	3.76563	up	protein_coding	NM_178237	CCDS3503.1	EXOC1	RefSeq	3381	chr4	+	56719815	56771244	AAGAAGTTTGGTCTTCATGGAAGTTCGGGGAAATTAACTGGATCTACTTCTAGTCTAAAT	55763	exocyst complex component 1 isoform 2	4.97376	3.06086
ASHGA5P047942	0.00553941	0.0344085	3.76545	up	protein_coding	NM_199342	CCDS474.1	CCDC23	RefSeq	816	chr1	-	43272722	43283059	AACAGAGTCATGACAGAACTGGAGCAGCAGCAGTTTGATGAGTTCTGTAAACAGATGCAG	374969	coiled-coil domain-containing protein 23	5.31695	3.40413
ASHGA5P003058	0.0288988	0.0814911	3.7615	up	protein_coding	NM_016129	CCDS3600.1	COPS4	RefSeq	1765	chr4	+	83956238	83996971	CATTTTGAAACACGAGAAGCCCTGCCAACGTGGGATAAGCAGATCCAATCACTTTGTTTC	51138	COP9 signalosome complex subunit 4 isoform 1	5.41573	3.50442
ASHGA5P009874	0.00520809	0.0340396	3.76003	up	protein_coding	NM_152524	CCDS42796.1	SGOL2	RefSeq	4542	chr2	+	201390864	201448818	GAACCCAAAAATCAGGAATAGGTGATAGACCATTACAGGACTTGTCAAATACCAGTTTTG	151246	shugoshin-like 2 isoform 1	4.65313	2.74239
ASHGA5P002634	0.00378605	0.0329783	3.75459	up	protein_coding	ENST00000261560	CCDS32978.1	ZNF430	GENCODE	3919	chr19	+	21203425	21242852	AGACATGCGATGGTAGATCAACCCCCAGTTACATATTCTCATTTTGCCCAAGACCTTTGG	80264	zinc finger protein 430 [Source:HGNC Symbol;Acc:20808]	7.76259	5.85394
ASHGA5P050763	0.00583531	0.0347584	3.7486	up	protein_coding	NM_001127184	CCDS46487.1	CFLAR	RefSeq	1299	chr2	+	201980876	202006323	CCTGATCTGAAAATTCTTGGAAATTGTTCCATGTGATTAACATGGAACTGCCTCTACTTA	8837	CASP8 and FADD-like apoptosis regulator isoform 2	7.09259	5.18624
ASHGA5P012023	0.00366154	0.0329783	3.7483	up	protein_coding	ENST00000401084	CCDS41277.1	CAPZB	GENCODE	1710	chr1	-	19665266	19812066	ATGGGCTGAGGTCTGTGCAGACTTTTGCAGACAAATCAAAACAAGAAGCTCTGAAGAATG	832	"capping protein (actin filament) muscle Z-line, beta [Source:HGNC Symbol;Acc:1491]"	6.81643	4.91019
ASHGA5P003167	0.00439872	0.0334484	3.74312	up	protein_coding	ENST00000265073	CCDS3897.1	SUB1	GENCODE	3507	chr5	+	32585604	32604185	CGAGCGAAGCGATGCCTAAATCAAAGGAACTTGTTTCTTCAAGCTCTTCTGGCAGTGATT	10923	SUB1 homolog (S. cerevisiae) [Source:HGNC Symbol;Acc:19985]	6.93984	5.03559
ASHGA5P055369	0.00483734	0.0338278	3.74146	up	protein_coding	NM_138371	CCDS8752.1	PCED1B	RefSeq	2091	chr12	+	47610051	47630443	GCCTCAATAGACGGACCTAGGCCTTATTTCCTCTTTATGAACATGGATTGGACAGATCTG	91523	protein FAM113B	6.56119	4.65759
ASHGA5P001836	0.026713	0.0774183	3.74019	up	protein_coding	NM_001003962	CCDS12489.1	CAPNS1	RefSeq	1489	chr19	+	36630917	36641255	AGGTGAACATCCAGGAGTGGCTGCAGCTGACTATGTATTCCTGAACTGGAGCCCCAGACC	826	calpain small subunit 1	7.28044	5.37733
ASHGA5P003001	0.00365734	0.0329783	3.73928	up	protein_coding	NM_016951	CCDS10807.1	CKLF	RefSeq	888	chr16	+	66586465	66600190	GCCTTTGCTTGATATTATCAACTCACTGGTAACAACAGTATTCATGCTCATCGTATCTGT	51192	chemokine-like factor isoform a	7.05815	5.15539
ASHGA5P001021	0.0288155	0.0813208	3.73912	up	protein_coding	ENST00000217901	CCDS14730.1	IDH3G	GENCODE	1485	chrX	-	153051220	153059978	CTCCATCCGTAAGGCTGTCCTGGCATCCATGGACAATGAGAATATGCACACTCCGGACAT	3421	isocitrate dehydrogenase 3 (NAD+) gamma [Source:HGNC Symbol;Acc:5386]	8.11568	6.21298
ASHGA5P014591	0.0074056	0.0377978	3.73791	up	protein_coding	NM_030984	CCDS5856.1	TBXAS1	RefSeq	1919	chr7	+	139528951	139720125	ACCCTGAAAGGTACCGCTGCAGCTAGAATCCAAATCTGCCCTAGGTCCAAAAAATGGTGT	6916	thromboxane-A synthase isoform 2	6.37742	4.47519
ASHGA5P023525	0.00342892	0.0328172	3.73559	up	protein_coding	NM_015832	CCDS45871.1	MBD2	RefSeq	1367	chr18	-	51729049	51751158	AAACAGAGACTGCGAAACGATCCTCTCAATCAAAATAAGCTGCGCTGGAACACTCATCGT	8932	methyl-CpG-binding domain protein 2 testis-specific isoform	4.95753	3.05619
ASHGA5P041193	0.00504636	0.0338278	3.73502	up	protein_coding	NM_003248	CCDS4049.1	THBS4	RefSeq	3233	chr5	+	79331169	79379107	TCCTGCTGCACCTGGTCCTGCAGCGGTGGCTAGCGGCAGGCGCCCAGGCCACCCCCCAGG	7060	thrombospondin-4 precursor	9.50418	7.60307
ASHGA5P004740	0.0227783	0.0700187	3.73397	up	protein_coding	ENST00000296595	CCDS4065.1	TMEM161B	GENCODE	2594	chr5	-	87491022	87564665	GTATCCCTTTAATGACAGAAGCCACATTCGATACTCTGCGACTCTGGTTAATAATCCTGC	153396	transmembrane protein 161B [Source:HGNC Symbol;Acc:28483]	5.62363	3.72291
ASHGA5P008964	0.00386352	0.0329783	3.73228	up	protein_coding	NM_201517	CCDS5498.1	H2AFV	RefSeq	1315	chr7	-	44873212	44887725	TGGGCTACAGGTGCTGGAGCTGGCAGGTAATGCTTCTAAGGATCTCAAAGTAAAGCGTAT	94239	histone H2A.V isoform 5	6.64113	4.74107
ASHGA5P011742	0.00323327	0.0326774	3.73023	up	protein_coding	NM_003022	CCDS14449.1	SH3BGRL	RefSeq	2090	chrX	+	80457302	80554046	CTCTACAGCGATTAAGAAGAAACAACAAGATGTGCTTGGTTTCCTAGAAGCCAACAAAAT	6451	SH3 domain-binding glutamic acid-rich-like protein	4.95034	3.05108
ASHGA5P008638	0.00222011	0.0308881	3.7286	up	protein_coding	NM_001114092	CCDS2573.1	THUMPD3	RefSeq	3775	chr3	+	9404716	9428475	ACATTGCATCTTTATTGACCAAGAGCCAAATTAAAGAAGGCAAACCCTCCTGGGGCTTGC	25917	THUMP domain-containing protein 3	6.23313	4.33449
ASHGA5P051929	0.00580476	0.0347584	3.72829	up	protein_coding	ENST00000381799	CCDS3458.1	RHOH	GENCODE	1999	chr4	+	40198526	40246281	TAAACCCCAAGAGACTTCACACAACACTTATGTATGCACCCCAAAGACTAATGGGGAGAG	399	ras homolog family member H [Source:HGNC Symbol;Acc:686]	8.11941	6.22089
ASHGA5P055563	0.0317863	0.0867884	3.72633	up	protein_coding	NM_001731	CCDS9043.1	BTG1	RefSeq	4704	chr12	-	92534053	92539673	AGAACGAGCCCTTCCAAAAACTACAATATGATGACTGTATCAGGTTAAGATATAGTCTGT	694	protein BTG1	8.26202	6.36427
ASHGA5P003951	0.00510297	0.0338278	3.72306	up	protein_coding	NM_006023	CCDS7090.1	CDC123	RefSeq	1566	chr10	+	12237960	12292589	GCTCACAAGCTAATAGACTTCCTTAAGCTGAAGAGAAATCAGCAGGAGGACGACTGATGA	8872	cell division cycle protein 123 homolog	6.67543	4.77894
ASHGA5P017259	0.00681346	0.0363903	3.72278	up	protein_coding	NM_174893	CCDS32542.1	C17orf49	RefSeq	909	chr17	+	6918055	6920843	AAACTCAACTTCGACCAGGCCTGACCCTGGATTCTGGCCTTCTCATGACCTCTGCTGATC	124944	chromatin complexes subunit BAP18 isoform 2	7.76375	5.86737
ASHGA5P010570	0.0372312	0.0965812	3.71481	up	protein_coding	NM_181514	CCDS8186.1	MRPL21	RefSeq	713	chr11	-	68658745	68671303	ATCTACCAGGATATGTTCCTAAAACATCCCTGAGTTCACCACCTTGGCCAGAAGTTGTTC	219927	"39S ribosomal protein L21, mitochondrial isoform d"	7.82265	5.92936
ASHGA5P034698	0.00795054	0.0391834	3.71335	up	protein_coding	NM_004228	CCDS12722.1	CYTH2	RefSeq	4622	chr19	+	48972464	48985571	AACTGCTTTGAACTTTACATCCCCAACAACAAGGGGCAGCTCATCAAAGCCTGCAAAACT	9266	cytohesin-2 isoform 2	6.7057	4.81298
ASHGA5P033787	0.00530068	0.0340831	3.70851	up	protein_coding	NM_013326	CCDS32803.1	C18orf8	RefSeq	2173	chr18	+	21083461	21111744	CCTTAAGGTTTATCCGGGGCATTGGTGGCCATGACAACATTTCTGCACGAAAATTTTTAG	29919	uncharacterized protein C18orf8	6.3469	4.45606
ASHGA5P052275	0.0172307	0.0588826	3.70585	up	protein_coding	NM_001015892	CCDS4002.1	TAF9	RefSeq	1482	chr5	-	68660569	68665840	AGTCTCCAGCTGTAAAAGCTTCAATTCCTGCAACCTCAGCAGTTCAGAATGTTCTGATTA	6880	adenylate kinase isoenzyme 6 isoform a	7.27539	5.38559
ASHGA5P009271	0.0327289	0.0885499	3.70143	up	protein_coding	NM_001098671	CCDS31598.1	RASGRP2	RefSeq	2284	chr11	-	64494382	64511630	GTAATAGATGCTGTGGTTGGATCAAGGACTCATTCCTGCCTTGGAGAAAATACTTCAACC	10235	RAS guanyl-releasing protein 2	8.06139	6.17331
ASHGA5P010944	0.00301286	0.0321046	3.69693	up	protein_coding	NM_001145264	CCDS44243.1	LAMTOR2	RefSeq	609	chr1	+	156024516	156028301	TAATGAAGACAATCTCAAATTCATCCTCATGGACTGCATGGCCCAGGCTTTGGTGCAGTA	28956	ragulator complex protein LAMTOR2 isoform 2	6.53115	4.64482
ASHGA5P008787	0.0266996	0.0774129	3.69393	up	protein_coding	NM_021709	CCDS9993.1	SIVA1	RefSeq	595	chr14	+	105219469	105225996	TCGCAGGAGGTCTTCGACCCATCTGGGGTAGCGTCCATTGCCTGTTCCTCATGCGTGCGA	10572	apoptosis regulatory protein Siva isoform 2	5.42825	3.54309
ASHGA5P054252	0.00419885	0.0331836	3.69298	up	protein_coding	NM_001042553	CCDS41465.1	TATDN3	RefSeq	2585	chr1	+	212965169	212990167	TCTATTTCAGCAGAATATATTGCCCAGGTGAAAGGGATCTCAGTGGAAGAAGTTATAGAA	128387	putative deoxyribonuclease TATDN3 isoform 2	5.66067	3.77588
ASHGA5P028073	0.0122502	0.0490403	3.69202	up	protein_coding	NM_001035267	CCDS44919.1	RPL41	RefSeq	593	chr12	+	56510373	56511616	AATCCATAGACATCTGACCTCGGCACTTAGCATCATCACAGCAAACTAACTGTAGCCTTT	6171	60S ribosomal protein L41	7.35057	5.46616
ASHGA5P045711	0.00735729	0.0377476	3.68331	up	protein_coding	NM_001833	CCDS6600.1	CLTA	RefSeq	1156	chr9	+	36190852	36212059	TGACTTTAACCCCAAGTCTAGCAAGCAGGCCAAAGATGTCTCCCGCATGCGCTCAGTCCT	1211	clathrin light chain A isoform a	7.86168	5.98068
ASHGA5P006787	0.0158787	0.0562437	3.67783	up	protein_coding	NM_001040031	CCDS46139.1	CD37	RefSeq	1229	chr19	+	49838676	49843861	CCTACTCGAGCTCGGGTTCATGACGCTCTCGATATTCCTGTGCAGAAACCTGGACCACGT	951	leukocyte antigen CD37 isoform B	5.52155	3.6427
ASHGA5P006734	0.00549916	0.0343796	3.67746	up	protein_coding	NM_001019	CCDS10571.1	RPS15A	RefSeq	554	chr16	-	18794276	18801656	GCAATCTAAGCCACAATGGTGCGCATGAATGTCCTGGCAGATGCTCTCAAGAGTATCAAC	6210	40S ribosomal protein S15a	8.3508	6.47209
ASHGA5P054220	0.00860159	0.0404731	3.67663	up	protein_coding	ENST00000329134	CCDS14785.1	UTY	GENCODE	4325	chrY	-	15434913	15592550	TAAACTTTTAAAAATGTAAGCAAAATTACAGTATGTAAAACACACATTGCTAATGGAGAA	7404	"ubiquitously transcribed tetratricopeptide repeat gene, Y-linked [Source:HGNC Symbol;Acc:12638]"	5.65503	3.77665
ASHGA5P038006	0.00457941	0.0337557	3.67283	up	protein_coding	NM_014248	CCDS14009.1	RBX1	RefSeq	906	chr22	+	41347350	41369019	GTGGATACCCCGAGCGGCACCAACAGCGGCGCGGGCAAGAAGCGCTTTGAAGTGAAAAAG	9978	E3 ubiquitin-protein ligase RBX1	7.14045	5.26355
ASHGA5P004572	0.00379397	0.0329783	3.66887	up	protein_coding	NM_018460	CCDS2184.1	ARHGAP15	RefSeq	1774	chr2	+	143886898	144525921	CCATGAAAGTCCTCTTTGGACATCTAACTAAGATAGTGGCCAAAGCCTCCAAGAACCTCA	55843	rho GTPase-activating protein 15	5.97718	4.10184
ASHGA5P047132	0.00501878	0.0338278	3.66742	up	protein_coding	NM_007041	CCDS31299.1	ATE1	RefSeq	2224	chr10	-	123502624	123687546	TTCTTTGTATGTCAAGTATCAAGTGGCCATACACCAGGATCCACCCGATGAATGTGGGAA	11101	arginyl-tRNA--protein transferase 1 isoform 2	5.44751	3.57274
ASHGA5P018803	0.00870139	0.0407732	3.66705	up	protein_coding	NM_001195101	CCDS53292.1	PTP4A2	RefSeq	3445	chr1	-	32372021	32385259	AAGTTCACAGAGGATTGGCCATTTGATGATGGAGCTCCACCCCCTAATCAGATAGTAGAT	8073	protein tyrosine phosphatase type IVA 2 isoform 4	9.12313	7.24851
ASHGA5P056145	0.00828947	0.0398832	3.66677	up	protein_coding	NM_003384	CCDS9947.1	VRK1	RefSeq	1720	chr14	+	97263683	97347951	AAGACCCCAAAAGATGTCACGATGGCACTATTGAATTCACGAGCATCGATGCACACAATG	7443	serine/threonine-protein kinase VRK1	5.70346	3.82895
ASHGA5P050443	0.000510352	0.0216207	3.65093	up	protein_coding	NM_006449	CCDS1791.1	CDC42EP3	RefSeq	5715	chr2	-	37869024	37899342	GGTGCTGAATGTAATGGATAAAAATAAGTAACAAGATGCCAACTTTTTTCCTTTGGGGTA	10602	cdc42 effector protein 3	5.94466	4.07639
ASHGA5P039735	0.000141823	0.0146987	3.64992	up	protein_coding	NM_020827	CCDS47168.1	KIAA1430	RefSeq	4892	chr4	-	186080818	186125182	AACTGATGGACTATCATCGCAATATGGGCTATCTCAACTCATCACCATTGTCAAGACGGG	57587	UPF0501 protein KIAA1430	5.24865	3.38078
ASHGA5P013402	0.00827135	0.0398582	3.64723	up	protein_coding	NM_024684	CCDS8254.1	C11orf67	RefSeq	557	chr11	+	77532207	77583398	AGTGCGGTGGACTTCAGTGAAGTTCCTTATGACTTCCCCTGAAATTGCTTCCTTATCATG	28971	UPF0366 protein C11orf67	4.86505	2.99825
ASHGA5P003410	0.00386175	0.0329783	3.64414	up	protein_coding	NM_004049	CCDS10312.1	BCL2A1	RefSeq	899	chr15	-	80253231	80263643	CGGAGGCTGGGAAAATGGCTTTGTAAAGAAGTTTGAACCTAAATCTGGCTGGATGACTTT	597	bcl-2-related protein A1 isoform 1	8.53609	6.67051
ASHGA5P002493	0.00238062	0.031171	3.64379	up	protein_coding	NM_001145057	CCDS8206.2	IL18BP	RefSeq	1371	chr11	+	71710662	71713574	CCAGCTCTGGGCTGGGCTGAGGGCAACCTTGCCCCCCACCCAAGAAGCCCTGCCCTCCAG	10068	interleukin-18-binding protein isoform a precursor	11.7284	9.863
ASHGA5P048608	0.00398366	0.0330479	3.64007	up	protein_coding	NM_018648	CCDS10037.1	NOP10	RefSeq	552	chr15	-	34633916	34635362	TTCTCCCCAGATGACAAATACTCTCGACACCGAATCACCATCAAGAAACGCTTCAAGGTG	55505	H/ACA ribonucleoprotein complex subunit 3	8.50295	6.63899
ASHGA5P028257	0.00568914	0.0345083	3.63992	up	protein_coding	NM_007062	CCDS9114.1	PWP1	RefSeq	1853	chr12	+	108079589	108106257	TTTATGCCTTTGGAGGTCAAAAAGAAGGGCTTCGGGTCTGGGATATAAGCACAGTCTCTT	11137	periodic tryptophan protein 1 homolog	5.86445	4.00055
ASHGA5P006543	0.0254758	0.0749847	3.63953	up	protein_coding	ENST00000319942	CCDS669.1	RABGGTB	GENCODE	1496	chr1	+	76251885	76260764	GCCGGAGAAGTTACCAGATGTATGCTACTCATGGTGGGTCCTGGCTTCCCTAAAGATAAT	5876	"Rab geranylgeranyltransferase, beta subunit [Source:HGNC Symbol;Acc:9796]"	8.32764	6.46389
ASHGA5P001235	0.00468536	0.0338278	3.63506	up	protein_coding	ENST00000224073	CCDS7011.1	EDF1	GENCODE	640	chr9	-	139756570	139760738	TCGAGCGGGCCATTGGCCTCAAGCTCCGGGGAAAGGACATTGGAAAGCCCATCGAGAAGG	8721	endothelial differentiation-related factor 1 [Source:HGNC Symbol;Acc:3164]	6.83217	4.97019
ASHGA5P005905	0.0079091	0.0390737	3.6347	up	protein_coding	NM_016096	CCDS6291.1	ZNF706	RefSeq	2755	chr8	-	102209265	102217960	CCCGGCCCGGATATGGCTCGTGGACAGCAGAAAATTCAGTCTCAGCAGAAAAATGCCAAA	51123	zinc finger protein 706	6.3594	4.49756
ASHGA5P045495	0.011567	0.0474558	3.632	up	protein_coding	NM_052844	CCDS6906.2	WDR34	RefSeq	1818	chr9	-	131395939	131419129	TGATCTCCAGAAAAGCTCCCAGAAACCCACAGTTTTGATCAAGCAAACCCAGGATGAAAG	89891	WD repeat-containing protein 34	5.7039	3.84314
ASHGA5P056069	0.0133148	0.0513002	3.62942	up	protein_coding	NM_015484	CCDS259.1	SYF2	RefSeq	1777	chr1	-	25548766	25559013	ACCTGCAAATTGGGAAGCCAAAAAAGCTCGTTTGGAGTGGGAACTAAAGGAAGAGGAAAA	25949	pre-mRNA-splicing factor SYF2 isoform 1	5.8583	3.99856
ASHGA5P007518	0.00287425	0.0318783	3.62922	up	protein_coding	NM_181869	CCDS9071.1	APAF1	RefSeq	4559	chr12	+	99039077	99129211	AGAATGTAAAGTGGTGGAACGTTGTCACTGGGGAATCCTCACAGACCTTCTACACAAATG	317	apoptotic protease-activating factor 1 isoform e	5.25414	3.39447
ASHGA5P010456	0.00976683	0.0434309	3.61617	up	protein_coding	NM_145806	CCDS7677.1	ZNF511	RefSeq	1098	chr10	+	135122422	135126666	ACAGACATAGAATACCCTCTACCATCTGCTTTGGTCAGGGTGCCGCTCGAGGATTTAAAA	118472	zinc finger protein 511	5.66531	3.81085
ASHGA5P000825	0.00348482	0.0328172	3.6095	up	protein_coding	NM_002294	CCDS14599.1	LAMP2	RefSeq	6603	chrX	-	119560002	119603204	ACACAAGGAAAGTATTCTACAGCTCAAGACTGCAGTGCAGATGACGACAACTTCCTTGTG	3920	lysosome-associated membrane glycoprotein 2 isoform A precursor	5.10738	3.25558
ASHGA5P014137	0.00659301	0.035916	3.60913	up	protein_coding	NM_001003696	CCDS13574.1	ATP5J	RefSeq	841	chr21	-	27096790	27107965	GGCTCACGAGAATCAGCATGATTCTTCAGAGGCTCTTCAGGTTCTCCTCTGTCATTCGGT	522	"ATP synthase-coupling factor 6, mitochondrial isoform a precursor"	5.47123	3.61958
ASHGA5P001711	0.0106624	0.0455995	3.60785	up	protein_coding	NM_020317	CCDS260.1	C1orf63	RefSeq	1482	chr1	-	25568739	25573985	AAAGCCTGAACTGTCGGAAAAGGTAACAGAAGATGGAACTCGAAATCCCAATGAAAAACC	57035	UPF0471 protein C1orf63	9.26228	7.41114
ASHGA5P004857	0.00523343	0.0340745	3.60165	up	protein_coding	NM_001001	CCDS9689.1	RPL36AL	RefSeq	549	chr14	-	50085406	50087349	CTGTTTCTCGTTTTCATCATATAGACAAAACAGCCCTGCTGCAAAGATGGTCAACGTACC	6166	60S ribosomal protein L36a-like	8.14321	6.29455
ASHGA5P009218	0.00354449	0.0328487	3.60012	up	protein_coding	NM_033295	CCDS8332.1	CASP1	RefSeq	443	chr11	-	104896236	104905884	ATGGGTGAAGATAATGTTTCTTGGAGACATCCCACAATGGGCTCTGTTTTTATTGGAAGA	834	caspase-1 isoform epsilon	7.23428	5.38623
ASHGA5P018459	0.00638866	0.0354584	3.59959	up	protein_coding	NM_153201	CCDS44754.1	HSPA8	RefSeq	1872	chr11	-	122928199	122932901	AAGTTTGAACTCACAGGCATGCCAGGAGGAATGCCTGGGGGATTTCCTGGTGGTGGAGCT	3312	heat shock cognate 71 kDa protein isoform 2	7.32403	5.47619
ASHGA5P010528	0.00393306	0.0329783	3.5832	up	protein_coding	ENST00000441611	CCDS7491.1	BLOC1S2	GENCODE	2024	chr10	-	102033712	102046114	GAACTGACGGCCACCAGTGAAGACTATAAGCTCCTGGAAAATATGAATAAACTCACCAGC	282991	"biogenesis of lysosomal organelles complex-1, subunit 2 [Source:HGNC Symbol;Acc:20984]"	5.08392	3.24267
ASHGA5P007188	0.00778757	0.0386796	3.58179	up	protein_coding	NM_003916	CCDS14173.1	AP1S2	RefSeq	2283	chrX	-	15843928	15873100	ACTGCAGGAGGAAGCTGAAACCCCACGTAGTGTTCTTGAAGAAATTGGACTGACATAACT	8905	AP-1 complex subunit sigma-2	6.37639	4.53571
ASHGA5P052254	0.00411149	0.0330909	3.58083	up	protein_coding	NM_153706	CCDS3972.1	SETD9	RefSeq	1722	chr5	+	56205086	56213165	CTACTACACAATTGTCAGCTAACTCTGTGAATCAGAAATTATTAGGTTTTCTACTCAGCT	133383	SET domain-containing protein 9 isoform 1	5.57093	3.73063
ASHGA5P008478	0.00844013	0.0401235	3.5771	up	protein_coding	NM_001220769		IKZF1	RefSeq	5830	chr7	+	50344377	50472798	ACAGCAAAGCTCCAAGAGTGACAGAGTCGTGGGAGAACGGCCCTTCCAGTGCAATCAGTG	10320	DNA-binding protein Ikaros isoform 6	5.25554	3.41675
ASHGA5P055103	0.00145516	0.0274621	3.57085	up	protein_coding	NM_144664	CCDS41700.1	FAM76B	RefSeq	3958	chr11	-	95502105	95522954	TCTCCTTGAGAAAGTCATTTGTTTAGCATTTCTTCTTACAATGTAAATTTGGGGAAAAAA	143684	protein FAM76B	6.12599	4.28972
ASHGA5P006123	0.010035	0.0439495	3.57035	up	protein_coding	NM_001127505	CCDS47813.1	ASAH1	RefSeq	2485	chr8	-	17913924	17942507	AGGACTGCAGAAAATCAACCTATCCTCCTTCAGGACCAACTGTCTTCCCTGCTGTTATAA	427	acid ceramidase isoform c	7.88832	6.05226
ASHGA5P033583	0.00755193	0.0381794	3.56791	up	protein_coding	ENST00000261332	CCDS11912.1	ZNF24	GENCODE	6311	chr18	-	32912177	32924426	CGTATAGTCAAAGCTCAAATCTTTTTAGACATCAGAGAAGACACAATGCAGAAAAACTTC	7572	zinc finger protein 24 [Source:HGNC Symbol;Acc:13032]	6.9788	5.14372
ASHGA5P049783	0.00122185	0.026401	3.56166	up	protein_coding	NM_002876	CCDS45745.1	RAD51C	RefSeq	607	chr17	+	56769962	56772695	CAGGTGTTGGAAAAACACAATTATGGTAAAATAAAGTGTTCTCCTTTTAAGGGTGGGTTT	5889	DNA repair protein RAD51 homolog 3 isoform 2	7.65287	5.82032
ASHGA5P053885	0.0161546	0.0566101	3.56036	up	protein_coding	NM_153200	CCDS7012.1	EDF1	RefSeq	538	chr9	-	139757232	139760738	ATACCCAATAACCAGGTGCTTGGCAAAATCGAGCGGGCCATTGGTGAGTGTCCCTCCACC	8721	endothelial differentiation-related factor 1 isoform beta	7.14293	5.3109
ASHGA5P010288	0.0070148	0.036892	3.55676	up	protein_coding	NM_001935	CCDS2216.1	DPP4	RefSeq	3913	chr2	-	162848754	162931052	TTGGAGTGGATTTCCAGGCAATGTGGTATACTGATGAAGACCATGGAATAGCTAGCAGCA	1803	dipeptidyl peptidase 4	5.40216	3.5716
ASHGA5P042374	0.00525802	0.0340831	3.55514	up	protein_coding	NM_001040438	CCDS34416.1	C6orf48	RefSeq	748	chr6	+	31802692	31807541	TGGAGAGAAGCTTTGTATGGCTGTCATGCTTAGACAGTGATTCCTGCAACTTGACCTTCA	50854	protein G8	7.59132	5.76141
ASHGA5P014048	0.0215183	0.0675521	3.55218	up	protein_coding	NM_003965	CCDS43079.1	CCRL2	RefSeq	1745	chr3	+	46448720	46451014	CAGCCCAGTGGGCAGTCTGAAGATGGCCAATTACACGCTGGCACCAGAGGATGAATATGA	9034	C-C chemokine receptor-like 2 isoform 1	5.54494	3.71623
ASHGA5P014022	0.0395379	0.100593	3.5483	up	protein_coding	ENST00000398733	CCDS43369.1	UBE2D2	GENCODE	2702	chr5	+	138940750	139008018	AATCCACAAGGAATTGAATGATCTGGCACGGGACCCTCCAGCACAGTGTTCAGCAGGTCC	7322	ubiquitin-conjugating enzyme E2D 2 [Source:HGNC Symbol;Acc:12475]	8.29096	6.46384
ASHGA5P000736	0.0113435	0.0470314	3.54766	up	protein_coding	NM_005113	CCDS9905.1	GOLGA5	RefSeq	2891	chr14	+	93260649	93306304	TCAATTGATCAGTTTAGTATTCGCCTGGGAATTTTTCTCCGAAGATACCCCATAGCGCGA	9950	Golgin subfamily A member 5	5.62814	3.80127
ASHGA5P007833	0.0132584	0.0511796	3.54423	up	protein_coding	NM_001024466	CCDS34564.1	SOD2	RefSeq	918	chr6	-	160100148	160114353	CAGTGTGCGGCACCAGCAGGCAGCTGGCTCCGGTTTTGGGGTATCTGGGCTCCAGGCAGA	6648	"superoxide dismutase [Mn], mitochondrial isoform B precursor"	5.0282	3.20273
ASHGA5P033060	0.0029405	0.0319884	3.54028	up	protein_coding	NM_002988	CCDS11306.1	CCL18	RefSeq	793	chr17	+	34391642	34398841	ATACCTCCTGGCAGATTCCACAAAAGTTCATAGTTGACTATTCTGAAACCAGCCCCCAGT	6362	C-C motif chemokine 18 precursor	7.50829	5.68442
ASHGA5P008881	0.00344559	0.0328172	3.5377	up	protein_coding	ENST00000348222	CCDS1932.1	DGUOK	GENCODE	880	chr2	+	74153952	74186088	ACAGTGACAGGCTCCACTTTGAGGCTCTGATGAACATTCCAGTGCTGGTGTTGGATGTCA	1716	deoxyguanosine kinase [Source:HGNC Symbol;Acc:2858]	7.31074	5.48793
ASHGA5P013226	0.00280384	0.0318783	3.53309	up	protein_coding	NM_001130447	CCDS45247.1	HAUS2	RefSeq	3860	chr15	+	42841010	42862190	GGTCAATCAGAAAAACCTGGAAATTGAACTCCTGAAACTAGAAAAAGATACAGCAGATGT	55142	HAUS augmin-like complex subunit 2 isoform 2	5.06881	3.24788
ASHGA5P038545	0.00400806	0.0330479	3.52713	up	protein_coding	NM_145860	CCDS3202.1	PDCD10	RefSeq	1212	chr3	-	167401694	167452630	TGGCCTGAAAGTTGTATATGTTAAGAGATGTACTTCTCAGTGGCAGTATTGAACTGCCTT	11235	programmed cell death protein 10	5.77451	3.95602
ASHGA5P017849	0.012248	0.0490403	3.52582	up	protein_coding	NM_033294	CCDS8331.1	CASP1	RefSeq	968	chr11	-	104896236	104905884	TGCCGTGGTGATAATGTTTCTTGGAGACATCCCACAATGGGCTCTGTTTTTATTGGAAGA	834	caspase-1 isoform delta	7.32862	5.51066
ASHGA5P011028	0.00957471	0.0429303	3.52209	up	protein_coding	NM_001007793	CCDS31306.1	BUB3	RefSeq	1555	chr10	+	124913759	124924886	CAAAACCCAAGTCCACCTAATCATCCTGTGAAAGTGGTTTCTCTATGGAAAGCTTTGTTT	9184	mitotic checkpoint protein BUB3 isoform b	7.04148	5.22504
ASHGA5P013372	0.00298113	0.0320346	3.51011	up	protein_coding	NM_033306	CCDS41704.1	CASP4	RefSeq	1352	chr11	-	104813593	104827422	TAGACCAAATATCCCCCAATAAAAAAGCTCATCCGAATATGGAGGCTGGACCACCTGAGT	837	caspase-4 isoform gamma precursor	5.85085	4.03933
ASHGA5P049484	0.0113929	0.047102	3.50607	up	protein_coding	NM_025099	CCDS42259.1	CTC1	RefSeq	7089	chr17	-	8128138	8151413	AAGTAAACAGAAAGCTTACTTCATCCTGTCTCTTGGTAGATCACACCCAGCTGTCACCCA	80169	CST complex subunit CTC1	4.77271	2.96286
ASHGA5P005490	0.023521	0.0712909	3.50466	up	protein_coding	NM_004853	CCDS32565.1	STX8	RefSeq	988	chr17	-	9153787	9479275	ATCTAATCAGGTCCAGCCTGATGAGTGAAGAGGCTAAGCGAGGAGCACCCAACCCTTGGC	9482	syntaxin-8	6.63121	4.82194
ASHGA5P005063	0.0050296	0.0338278	3.49069	up	protein_coding	NM_003414	CCDS32440.1	ZNF267	RefSeq	3268	chr16	+	31885078	31928629	ATCCAGCCAGATGTGTTTTCGCATTATAACAAGGACCTGTTGACAGAGCACTGCACAGAA	10308	zinc finger protein 267 isoform 1	6.12692	4.32341
ASHGA5P010978	0.0330325	0.0892062	3.48864	up	protein_coding	NM_145062	CCDS5110.1	ZUFSP	RefSeq	2226	chr6	-	116956780	116989973	AGGAGAAACTTGCCAGGAGACAAGCTTCTCAAGTCTTTACAGCCGAGAAGATTCCTTGAA	221302	zinc finger with UFM1-specific peptidase domain protein	6.57744	4.77477
ASHGA5P021786	0.00405076	0.0330909	3.4877	up	protein_coding	NM_001134484	CCDS47968.1	TOMM5	RefSeq	932	chr9	-	37588411	37592636	GCGGTTTGAGCTCCATTTATCTTAAAGAAATTGGACAGCATATGAAGACAGGACATCACA	401505	mitochondrial import receptor subunit TOM5 homolog isoform 3	6.77939	4.97712
ASHGA5P055331	0.00495919	0.0338278	3.48173	up	protein_coding	NM_016551	CCDS8710.1	TM7SF3	RefSeq	4346	chr12	-	27124505	27167339	GAGCGCCGAGTGACAAACATTCTGGACCCTAGCTACCACATTCCTCCATTGAGAGAGAGG	51768	transmembrane 7 superfamily member 3 precursor	7.74832	5.94851
ASHGA5P005565	0.00756338	0.0381994	3.47603	up	protein_coding	NM_013374	CCDS2660.1	PDCD6IP	RefSeq	5972	chr3	+	33840062	33911199	ATGCTTTCAAACAGTGTCAATACAAAGATACTCTCCCCAAGGAGGTGTTCCCTGTCTTGG	10015	programmed cell death 6-interacting protein isoform 1	6.26116	4.46372
ASHGA5P050745	0.00806015	0.0393926	3.47589	up	protein_coding	NM_139266	CCDS42793.1	STAT1	RefSeq	2798	chr2	-	191840262	191878976	TGTCTGAAGTGTAAGTGAACACAGAAGAGTGACATGTTTACAAACCTCAAGCCAGCCTTG	6772	signal transducer and activator of transcription 1-alpha/beta isoform beta	6.73514	4.93776
ASHGA5P009607	0.00096904	0.0249914	3.47557	up	protein_coding	NM_018890	CCDS5349.1	RAC1	RefSeq	2398	chr7	+	6414125	6443598	ACAGATTACGCCCCCTATCCTATCCGCAAACAGTTGGAGAAACGTACGGTAAGGATATAA	5879	ras-related C3 botulinum toxin substrate 1 isoform Rac1b	9.52637	7.72912
ASHGA5P004160	0.00306922	0.0322997	3.47462	up	protein_coding	NM_001628	CCDS5831.1	AKR1B1	RefSeq	1416	chr7	-	134127106	134143888	CCTTGTTGAGCTGTACCTCCCACAAGGATTACCCCTTCCATGAAGAGTTTTGAAGCTGTG	231	aldose reductase	7.42388	5.62702
ASHGA5P015165	0.00587247	0.0347584	3.47024	up	protein_coding	NM_001225	CCDS8327.1	CASP4	RefSeq	1319	chr11	-	104813593	104839325	CCTATGGCAGAAGGCAACCACAGAAAAAAGCCACTTAAGGTGTTGGAATCCCTGGGCAAA	837	caspase-4 isoform alpha precursor	4.84901	3.05397
ASHGA5P003990	0.00514285	0.0338359	3.46588	up	protein_coding	NM_138443	CCDS11928.1	HAUS1	RefSeq	1145	chr18	+	43684297	43708299	CACTATCAGAGAAACTGGCAAGATTAAAGCAACAGACTATACCTTTGAAGAAAAAATTGG	115106	HAUS augmin-like complex subunit 1	6.39367	4.60045
ASHGA5P006344	0.00877199	0.0409721	3.46423	up	protein_coding	NM_197967	CCDS13749.1	BID	RefSeq	2147	chr22	-	18216905	18257261	ATTTTATTAACCAGAACCTACGCACCTACGTGAGGAGCTTAGCCAGAAATGGGATGGACT	637	BH3-interacting domain death agonist isoform 3	7.75	5.95746
ASHGA5P011601	0.00679029	0.0363557	3.46073	up	protein_coding	NM_001190880	CCDS53309.1	HYI	RefSeq	1269	chr1	-	43916673	43919660	TCAGCCTCGAGGAGACACAGTAGAGGGCTTGAGTTGGCTACGTTCATACTGGGATAGGCG	81888	putative hydroxypyruvate isomerase isoform 3	5.69832	3.90725
ASHGA5P009076	0.00315873	0.0324685	3.45173	up	protein_coding	NM_181640	CCDS10808.1	CKLF	RefSeq	729	chr16	+	66586465	66600190	GCTGCGGCTGGATATTATCAACTCACTGGTAACAACAGTATTCATGCTCATCGTATCTGT	51192	chemokine-like factor isoform b	7.31818	5.53085
ASHGA5P005933	0.0107596	0.0457973	3.45018	up	protein_coding	NM_000982	CCDS9320.1	RPL21	RefSeq	582	chr13	+	27825691	27830702	CATCTTCCAGTAATTCGCCAAAATGACGAACACAAAGGGAAAGAGGAGAGGCACCCGATA	6144	60S ribosomal protein L21	11.2174	9.43077
ASHGA5P009225	0.00635627	0.0354584	3.44758	up	protein_coding	NM_080423	CCDS11864.1	PTPN2	RefSeq	1619	chr18	-	12785476	12884334	ACAGTGAGAGGCCAAGATTGACAGACACCTAATATTCATGACTTGAGAATATTCTGCAGC	5771	tyrosine-protein phosphatase non-receptor type 2 isoform 3	7.57728	5.7917
ASHGA5P013555	0.0258399	0.0756847	3.44495	up	protein_coding	NM_138448	CCDS1850.1	ACYP2	RefSeq	1238	chr2	+	54342409	54532435	TCAATTCCATGAAGTCCTGGCTGAGCAAGGTTGGAAGCCCTAGTTCTCGCATTGACCGCA	98	acylphosphatase-2	6.34886	4.56438
ASHGA5P017278	0.0140575	0.052629	3.44329	up	protein_coding	NM_022551	CCDS4771.1	RPS18	RefSeq	549	chr6	+	33239851	33244281	TGCAGCCATGTCTCTAGTGATCCCTGAAAAGTTCCAGCATATTTTGCGAGTACTCAACAC	6222	40S ribosomal protein S18	9.2138	7.43001
ASHGA5P005665	0.0097769	0.0434309	3.44078	up	protein_coding	NM_001137550	CCDS46551.1	LRRFIP1	RefSeq	4109	chr2	+	238536223	238690290	AAAGATAGGGGCATTAGAGAGGCAGAAAGAGTTCTTTGATTCCGTAAGGAGTGAACGGGA	9208	leucine-rich repeat flightless-interacting protein 1 isoform 1	6.25053	4.4678
ASHGA5P013783	0.0250975	0.0742789	3.43764	up	protein_coding	NM_172088	CCDS42256.1	TNFSF13	RefSeq	2112	chr17	+	7461608	7464925	TCTCCACATGGAACCTTCCTGGGACTTTGATTTTACGGATATCTTGCTTCTGTTCCCCAT	8741	tumor necrosis factor ligand superfamily member 13 isoform gamma proprotein	5.33234	3.55092
ASHGA5P034796	0.0030456	0.0321842	3.43246	up	protein_coding	NM_001001668	CCDS33122.1	ZNF470	RefSeq	7149	chr19	+	57078889	57094262	ACATCTTGCTCATCATCAGCGAATTCATACCGGAGAGTCATCAGTTATTCTCTCCTCTGC	388566	zinc finger protein 470	5.46189	3.68264
ASHGA5P013300	0.033251	0.0895631	3.42895	up	protein_coding	NM_001037494	CCDS9200.1	DYNLL1	RefSeq	820	chr12	+	120907659	120936298	CCCACCTCAGGTAACCATGTGCGACCGAAAGGCCGTGATCAAAAATGCGGACATGTCGGA	8655	"dynein light chain 1, cytoplasmic"	6.43188	4.65412
ASHGA5P052444	0.00318821	0.032576	3.42412	up	protein_coding	NM_030571	CCDS4273.1	NDFIP1	RefSeq	3599	chr5	+	141488323	141534008	TCTGGGTTTCCAAAGCCCCCATCTTACAATGTAGCTACAACACTGCCCAGTTATGATGAA	80762	NEDD4 family-interacting protein 1	6.27342	4.49769
ASHGA5P050425	0.0188442	0.0619822	3.42163	up	protein_coding	NM_003353	CCDS1747.1	UCN	RefSeq	615	chr2	-	27530264	27531130	TTCGACTCGGTGGGCAAGTGATGGCCCGGTTTGGGGCTGCGAAAACGTTGACCCCTTTCC	7349	urocortin preproprotein	5.69135	3.91667
ASHGA5P052894	0.00627208	0.0353305	3.42163	up	protein_coding	NM_016020	CCDS5248.1	TFB1M	RefSeq	2818	chr6	-	155577263	155635617	CTCACACTTTAAGAGCCTCTGTGATGTATACAGAAAAATGTGTGATGAAGACCCACAACT	51106	"dimethyladenosine transferase 1, mitochondrial"	5.90936	4.13468
ASHGA5P011774	0.0150956	0.0545157	3.41935	up	protein_coding	NM_138493	CCDS34441.1	CCDC167	RefSeq	637	chr6	-	37450696	37467700	CAGCCTAATGAACAAAGCCTCCAACTACGAGAAGGAACTGAAGTTTCTTCGGCAAGAGAA	154467	coiled-coil domain-containing protein 167	5.24544	3.47172
ASHGA5P055830	0.01357	0.0517358	3.4172	up	protein_coding	NM_006260	CCDS9479.1	DNAJC3	RefSeq	5598	chr13	+	96329392	96447243	ATTTAGATTTAAATTCCACTTCAATTAAACCAACTGTTTTTCTGCTCTTCTTAATTTTTT	5611	dnaJ homolog subfamily C member 3 precursor	5.61553	3.84271
ASHGA5P035492	0.0414914	0.103774	3.41701	up	protein_coding	NM_003151	CCDS2310.1	STAT4	RefSeq	2840	chr2	-	191894301	192015986	TCTCCAAGTGTGTATGCGGTGTTGAGAGAAAACCTGAGTCCCACAACAATTGAAACTGCA	6775	signal transducer and activator of transcription 4	6.99884	5.22611
ASHGA5P042339	0.0107632	0.0457973	3.41324	up	protein_coding	NM_001185094	CCDS53403.1	NIT1	RefSeq	1536	chr1	+	161087907	161090984	TGACCTCTATGGCAATCTGGGTCACCCACTGTCTTAAGACTTGACTTCTGTGAGTTTAGA	4817	nitrilase homolog 1 isoform 4	5.14153	3.37039
ASHGA5P013715	0.043566	0.107471	3.41016	up	protein_coding	NM_018221	CCDS46340.1	MOB1A	RefSeq	1336	chr2	-	74383210	74405995	CTTTGTTCAGGAGTTTAATCTGATTGATAGGCGTGAGCTGGCACCTCTTCAAGAATTAAT	55233	MOB kinase activator 1A	5.90395	4.13411
ASHGA5P004888	0.0189498	0.0621513	3.40728	up	protein_coding	NM_019852	CCDS32044.1	METTL3	RefSeq	1975	chr14	-	21966281	21979457	GGGAAGGAACACTGCTTGGTTGGTGTCAAAGGAAATCCCCAAGGCTTCAACCAGGGTCTG	56339	N6-adenosine-methyltransferase 70 kDa subunit	6.13496	4.36633
ASHGA5P001131	0.00561221	0.034492	3.40711	up	protein_coding	ENST00000221486	CCDS12282.1	RNASEH2A	GENCODE	1142	chr19	+	12917427	12924462	AAACTGCAGGACTTGGATACTGATTATGGCTCAGGCTACCCCAATGATCCCAAGACAAAA	10535	"ribonuclease H2, subunit A [Source:HGNC Symbol;Acc:18518]"	6.5605	4.79195
ASHGA5P008718	0.00736905	0.0377476	3.40693	up	protein_coding	NM_012383	CCDS6651.1	OSTF1	RefSeq	1313	chr9	+	77703397	77762114	AACCAGTCAAACCAGGGCAAGTTAAAGTCTTCAGAGCCCTGTATACGTTTGAACCCAGAA	26578	osteoclast-stimulating factor 1	4.91285	3.14438
ASHGA5P011405	0.0153354	0.054966	3.40242	up	protein_coding	NM_145243	CCDS608.1	OMA1	RefSeq	1928	chr1	-	58946390	59012446	TATACCTCAGGCTCTCAAAATTAGAGAGATGTGTAATTGTCCACCACTGTCTAATCCAGA	115209	"metalloendopeptidase OMA1, mitochondrial precursor"	6.08895	4.32239
ASHGA5P003563	0.0102173	0.0443459	3.40097	up	protein_coding	NM_002798	CCDS11056.1	PSMB6	RefSeq	849	chr17	+	4699438	4701798	AAGAGTGTCTGCAATTCACTGCCAATGCTCTCGCTTTGGCCATGGAGCGGGATGGCTCCA	5694	proteasome subunit beta type-6 isoform 1 proprotein	6.66553	4.89958
ASHGA5P013543	0.00295782	0.0320046	3.39939	up	protein_coding	NM_205858	CCDS42076.1	NMB	RefSeq	1041	chr15	-	85198359	85201802	CCAAATCCAGGAGGCTGCTGGTACAAATACTGCAGAAATGACACCAATAATGGGGCAGAC	4828	neuromedin-B isoform 2 preproprotein	7.5128	5.74753
ASHGA5P012830	0.000422782	0.0211462	3.39317	up	protein_coding	NM_019072	CCDS3988.1	SGTB	RefSeq	5453	chr5	-	64961754	65017941	ATGCAGAACCCTCAAGTTCAACAGCTAATGTCAGGAATGATGACAAATGCCATTGGGGGA	54557	small glutamine-rich tetratricopeptide repeat-containing protein beta	7.31288	5.55024
ASHGA5P019508	0.00514497	0.0338359	3.39203	up	protein_coding	NM_021237	CCDS54597.1	SELK	RefSeq	832	chr3	-	53919225	53925989	GGAATAGCTGAGTTTGTGGTTTTGTTTTTCAAAACTCTGCTTCAGCAAGATGTGAAAAAA	58515	selenoprotein K	5.38223	3.62008
ASHGA5P048058	0.0236998	0.0716408	3.38839	up	protein_coding	NM_004813	CCDS31472.1	PEX16	RefSeq	1929	chr11	-	45931219	45939674	ACCTGGCAGAAAATCTACTTCTACAGTTGGGGCTGACAGACCTCCCGGAAGGAGGGTGTG	9409	peroxisomal biogenesis factor 16 isoform 1	6.41121	4.65061
ASHGA5P004607	0.00643647	0.0355515	3.38697	up	protein_coding	NM_031372	CCDS3593.1	HNRPDL	RefSeq	4157	chr4	-	83343716	83351378	TATGGGAACTATGGATATGGACAGGGATATGCAGACTACAGTGGCCAACAGAGCACTTAT	9987	heterogeneous nuclear ribonucleoprotein D-like isoform a	7.50548	5.74549
ASHGA5P056054	0.0429567	0.10655	3.38601	up	protein_coding	NM_004450	CCDS9794.1	ERH	RefSeq	801	chr14	-	69846839	69865021	TTATAACAAAGACTGGATTAAAGAGAAGATCTACGTGCTCCTTCGTCGGCAGGCCCAACA	2079	enhancer of rudimentary homolog	5.21662	3.45704
ASHGA5P002619	0.0143357	0.0530661	3.38587	up	protein_coding	NM_005669	CCDS4109.2	REEP5	RefSeq	3116	chr5	-	112212080	112258031	TACTACATGCTGAAGTGTGGCTTCCTGTTGTGGTGCATGGCCCCGAGCCCTTCTAATGGG	7905	receptor expression-enhancing protein 5	8.42834	6.66881
ASHGA5P054905	0.00217282	0.0306998	3.38328	up	protein_coding	NM_015853	CCDS8029.1	UBXN1	RefSeq	1307	chr11	-	62443971	62446527	TCTGCAGGAGCTGGGTATGGCTGCAAGACTAGAAACCAGGACTAGAAACTGGGGGAGTAG	51035	UBX domain-containing protein 1	7.90145	6.14303
ASHGA5P054540	0.03025	0.0839206	3.38186	up	protein_coding	NM_020992	CCDS7441.1	PDLIM1	RefSeq	1462	chr10	-	96997329	97050781	TGAAGTGGTCACTGTGTTCCCCAAGTGAGCCAGCAGATCTGACCACTGTTCTCCAGCAGG	9124	PDZ and LIM domain protein 1	6.52846	4.77065
ASHGA5P008783	0.00447852	0.0335708	3.3816	up	protein_coding	NM_172215	CCDS53837.1	CAMKK2	RefSeq	2852	chr12	-	121681390	121736111	GGAAATCAAGATCCTGGTGAAGACCATGATACGTAAACGCTCCTTTGGGAACCCATTCGA	10645	calcium/calmodulin-dependent protein kinase kinase 2 isoform 6	4.92025	3.16254
ASHGA5P001592	0.0040028	0.0330479	3.38002	up	protein_coding	ENST00000237889	CCDS2336.1	NDUFB3	GENCODE	755	chr2	+	201936461	201950473	TTGCTGTCAGACATGGCCCATGAACATGGACATGAGCATGGACATCATAAAATGGAACTT	4709	"NADH dehydrogenase (ubiquinone) 1 beta subcomplex, 3, 12kDa [Source:HGNC Symbol;Acc:7698]"	6.13813	4.3811
ASHGA5P014543	0.012001	0.0483601	3.37944	up	protein_coding	NM_001130710	CCDS47571.1	LSM5	RefSeq	2212	chr7	-	32524944	32534870	GGACCTGGAGAGCTTGTGGACAAATGTATAGGATCAAGAATTCACATCGTGATGAAGAGT	23658	U6 snRNA-associated Sm-like protein LSm5 isoform b	5.7833	4.02652
ASHGA5P011002	0.00199816	0.0299571	3.37641	up	protein_coding	ENST00000368733	CCDS1038.1	S100A8	GENCODE	523	chr1	-	153362507	153363664	TCTTTCAGAAGACCTGGTGGGGCAAGTCCGTGGGCATCATGTTGACCGAGCTGGAGAAAG	6279	S100 calcium binding protein A8 [Source:HGNC Symbol;Acc:10498]	7.56441	5.80891
ASHGA5P001903	0.00393119	0.0329783	3.37582	up	protein_coding	NM_000631	CCDS13934.1	NCF4	RefSeq	1401	chr22	+	37257029	37274059	TCAGCACCATCAAGGACATCGCGGTGGAGGAAGATCTCAGCAGCACTCCCCTATTGAAAG	4689	neutrophil cytosol factor 4 isoform 1	6.92392	5.16868
ASHGA5P002069	0.01236	0.0492418	3.3618	up	protein_coding	NM_015965	CCDS12404.2	NDUFA13	RefSeq	557	chr19	+	19627018	19639013	ATCATGAAGGACGTGCCCGACTGGAAGGTGGGGGAGTCTGTGTTCCACACAACCCGCTGG	51079	NADH dehydrogenase [ubiquinone] 1 alpha subcomplex subunit 13	7.47308	5.72384
ASHGA5P005504	0.0197797	0.0639227	3.36099	up	protein_coding	NM_001161012	CCDS55148.1	ARMC10	RefSeq	2369	chr7	+	102715327	102740210	TTTGTCTGAAAATCCAGCCATGACAGAAGGACTTCTCCGTGCCCAAGTGGATTCATCATT	83787	armadillo repeat-containing protein 10 isoform d	5.72094	3.97205
ASHGA5P053468	0.0122614	0.0490403	3.35513	up	protein_coding	NM_014018	CCDS6226.1	MRPS28	RefSeq	724	chr8	-	80831094	80942506	TTTCGCGAGCGCGTTGGAGCGGCACTCGGAGCTTCTACAGAAGGTGGAGCCCCTACAGAA	28957	"28S ribosomal protein S28, mitochondrial"	5.34934	3.60297
ASHGA5P008101	0.00852469	0.0402585	3.35164	up	protein_coding	NM_024077	CCDS6683.1	SECISBP2	RefSeq	3477	chr9	+	91933411	91974561	TGTACAAGAGAGTTATCTTGGACACCAATGGGTTATGTTGTTCGACAGACATTATCTACA	79048	selenocysteine insertion sequence-binding protein 2	5.77346	4.02859
ASHGA5P013914	0.032811	0.0887063	3.34414	up	protein_coding	NM_178584	CCDS42726.1	SEPT10	RefSeq	3187	chr2	-	110300373	110371783	GCGGCACCTGAAAAGAGAAAACATTCGTTCGTTGACTATGTCTGGCCATGTTGGTTTTGA	151011	septin-10 isoform 2	7.14078	5.39914
ASHGA5P044724	0.00527831	0.0340831	3.34236	up	protein_coding	NM_003133	CCDS1546.1	SRP9	RefSeq	1524	chr1	+	225965514	225978168	TCCACACCATAGTATGCATTGTTATACATACTGTGTACCTAATTATGTATAGCAGTGTAG	6726	signal recognition particle 9 kDa protein isoform 2	6.18312	4.44225
ASHGA5P000881	0.0215161	0.0675521	3.34096	up	protein_coding	NM_002812	CCDS12515.2	PSMD8	RefSeq	1556	chr19	+	38865189	38874464	TGACAGACTACGCCAAGAAGCGAGGGTGGGTCCTGGGCCCCAACAACTACTACAGTTTTG	5714	26S proteasome non-ATPase regulatory subunit 8	6.98139	5.24112
ASHGA5P012225	0.0138209	0.0521688	3.33704	up	protein_coding	NM_138346	CCDS141.1	KIAA2013	RefSeq	2832	chr1	-	11979644	11986485	CAGGAGTAAGGAAGATCCCAGTGTCTGAGTGAACTAACAGTCCTGCTTTCAGCCACCATT	90231	uncharacterized protein KIAA2013 precursor	6.64296	4.90439
ASHGA5P010085	0.00626985	0.0353305	3.3278	up	protein_coding	NM_004244	CCDS8578.1	CD163	RefSeq	4190	chr12	-	7623411	7656414	AATTCCTCAGAAAATTCCCATGAGTCAGCTGATTTCAGTGCTGCTGAACTAATTTCTGTG	9332	scavenger receptor cysteine-rich type 1 protein M130 isoform a precursor	5.5159	3.78133
ASHGA5P003573	0.031704	0.0866605	3.32402	up	protein_coding	NM_014288	CCDS30736.1	ITGB3BP	RefSeq	1019	chr1	-	63906440	63988944	CCTCACAAAGCATCACGTCATCTTGACAGCTATGAATTCCTTAAAGCCATTTTAAACTGA	23421	centromere protein R isoform 2	7.4823	5.74937
ASHGA5P035435	0.00347447	0.0328172	3.32391	up	protein_coding	NM_001011708	CCDS42779.1	OLA1	RefSeq	4255	chr2	-	174937174	175113365	CTTCTTCAAATTTAACACACCTCAACAACCGAAGAAGAAATAAAATTTAGTTATTGCTCA	29789	obg-like ATPase 1 isoform 2	6.42777	4.69489
ASHGA5P008177	0.00723363	0.0373841	3.32323	up	protein_coding	NM_006860	CCDS13932.1	IFT27	RefSeq	1101	chr22	-	37154245	37172177	TTTTGAAACATCCGTGAAAGAGATGGAAAACTTCGAAGCCCCTTTCCACTGCCTTGCCAA	11020	intraflagellar transport protein 27 homolog isoform 2	8.16662	6.43404
ASHGA5P014105	0.00322038	0.0326774	3.32084	up	protein_coding	NM_152705	CCDS9324.1	POLR1D	RefSeq	2043	chr13	+	28195915	28241559	AGCTGGAGAGGAAAGCAATAGAAGAACTGCTTAAGGAGGCAAAACGTGGGAAAACTAGAG	51082	DNA-directed RNA polymerases I and III subunit RPAC2 isoform 2	5.11864	3.38708
ASHGA5P005640	0.00217173	0.0306998	3.31966	up	protein_coding	NM_012412	CCDS5496.1	H2AFV	RefSeq	1429	chr7	-	44873212	44887725	GCTGGGGGTGGTGTGATCCCTCACATCCACAAATCTCTGATTGGAAAGAAGGGACAGCAG	94239	histone H2A.V isoform 1	7.82499	6.09395
ASHGA5P002327	0.00934219	0.0423281	3.31839	up	protein_coding	NM_000700	CCDS6645.1	ANXA1	RefSeq	1399	chr9	+	75766780	75785307	AAGCCATGAAAGGTGTTGGAACTCGCCATAAGGCATTGATCAGGATTATGGTTTCCCGTT	301	annexin A1	8.31044	6.57995
ASHGA5P001875	0.0243534	0.0726679	3.31395	up	protein_coding	NM_004546	CCDS5862.1	NDUFB2	RefSeq	509	chr7	+	140396480	140406446	TGGAGTCCGTCATGCCGGTGGTGGTGTGCACATTGAGCCCCGGTATAGACAGTTCCCCCA	4708	"NADH dehydrogenase [ubiquinone] 1 beta subcomplex subunit 2, mitochondrial precursor"	7.63455	5.906
ASHGA5P004763	0.00688545	0.0366228	3.31352	up	protein_coding	NM_052971	CCDS4163.1	LEAP2	RefSeq	707	chr5	+	132209357	132210582	AAGGCTATGCAGAAAAAGACGCTGTTCCTTAAGTGTGGCCCAGGAATGATGTACATACCA	116842	liver-expressed antimicrobial peptide 2 precursor	5.12307	3.3947
ASHGA5P015467	0.014925	0.0542054	3.31319	up	protein_coding	NM_001190942	CCDS54680.1	TNFSF10	RefSeq	1805	chr3	-	172223297	172241297	CGTTAGAAAGACTCCAAGAATGAAAAGGCTCTGGGCCGCAAAATAAACTCCTGGGAATCA	8743	tumor necrosis factor ligand superfamily member 10 isoform 2	5.36586	3.63764
ASHGA5P040824	0.00493617	0.0338278	3.31008	up	protein_coding	NM_001040874	CCDS30849.1	HIST2H2AA4	RefSeq	534	chr1	+	149822627	149823161	TACTGCTCCCTAAGAAGACGGAGAGTCACCACAAGGCAAAGGGCAAGTGAGGCTGACGTC	723790	histone H2A type 2-A	7.66642	5.93955
ASHGA5P007374	0.00547528	0.0343796	3.30305	up	protein_coding	NM_172313	CCDS412.1	CSF3R	RefSeq	2999	chr1	-	36931643	36948915	CAGCGATCAGGCTGGGCCTCCCAGGCGATCTGCATACTTTAAGGACCAGATCATGCTCCA	1441	granulocyte colony-stimulating factor receptor isoform d precursor	7.49033	5.76653
ASHGA5P004191	0.0164824	0.0572791	3.30216	up	protein_coding	NM_004894	CCDS9986.1	C14orf2	RefSeq	673	chr14	-	104378624	104387903	CTGCGCCAAGATGCTTCAAAGTATTATTAAAAACATATGGATCCCCATGAAGCCCTACTA	9556	6.8 kDa mitochondrial proteolipid isoform 1	7.45518	5.73177
ASHGA5P009052	0.00681206	0.0363903	3.29843	up	protein_coding	NM_145182	CCDS10709.1	PYCARD	RefSeq	725	chr16	-	31212806	31214097	ACGCACCAGGGCCTGCACTTTATAGACCAGCACCGGGCTGCGCTTATCGCGAGGGTCACA	29108	apoptosis-associated speck-like protein containing a CARD isoform b	5.97815	4.25637
ASHGA5P011295	0.0162942	0.0569041	3.2968	up	protein_coding	NM_203341		SEP15	RefSeq	1801	chr1	-	87328127	87380107	GAAAATTGGGAAGGTTCCCTCAAGTCCAAGTATGTCCGTGGTTCAGACCCTGTATTAAAG	9403	15 kDa selenoprotein isoform 2 precursor	6.26242	4.54136
ASHGA5P013002	0.0148668	0.0541116	3.29634	up	protein_coding	NM_016003	CCDS34593.1	WIPI2	RefSeq	4435	chr7	+	5229834	5273486	AGGACAACACGTCCCTAGCTGTTGGTAGTAAGTCCGGTTATAAATTTTTCTCCCTTTCTT	26100	WD repeat domain phosphoinositide-interacting protein 2 isoform b	6.18143	4.46057
ASHGA5P002396	0.00566137	0.0345083	3.295	up	protein_coding	NM_004846	CCDS2496.1	EIF4E2	RefSeq	1014	chr2	+	233415356	233433920	ACAGCATCAAAATGCCAGGCAGGCTGGGCCCCCAAAGGCTCCTTTTTCAAAACCTCTGGA	9470	eukaryotic translation initiation factor 4E type 2	7.51747	5.7972
ASHGA5P032065	0.00568935	0.0345083	3.295	up	protein_coding	NM_006224	CCDS45563.1	PITPNA	RefSeq	3660	chr17	-	1421282	1466110	CAAAAGGACCCAGTGAAAGGAATGACAGCAGATGACTAAAGCCGCCTTTCCCCTCTGCAC	5306	phosphatidylinositol transfer protein alpha isoform	7.31125	5.59097
ASHGA5P020782	0.00391574	0.0329783	3.27792	up	protein_coding	NM_001193557	CCDS55270.1	ENY2	RefSeq	2876	chr8	+	110346551	110358189	GAAGAGTGTGGTTAGCAAGATGAACAAAGATGCGCAGATGAGAGCAGCGATTAACCAAAA	56943	enhancer of yellow 2 transcription factor homolog isoform 2	6.74488	5.0321
ASHGA5P020708	0.00443874	0.0334484	3.27552	up	protein_coding	NM_001011669	CCDS55232.1	CHCHD7	RefSeq	1747	chr8	+	57124314	57131176	AGAAACTCATGCACCAAACTCGAACTGGTAAGAAGACTGTTAGAATGCCCTCGGTAACAC	79145	coiled-coil-helix-coiled-coil-helix domain-containing protein 7 isoform c	7.49197	5.78025
ASHGA5P042797	0.0129817	0.0505084	3.27337	up	protein_coding	NM_004905	CCDS1307.1	PRDX6	RefSeq	1715	chr1	+	173446485	173457946	TTACAATTGTGAAGAGCCCACAGAAAAGTTACCTTTTCCCATCATCGATGATAGGAATCG	9588	peroxiredoxin-6	4.98027	3.26949
ASHGA5P015303	0.00183894	0.0290776	3.2722	up	protein_coding	NM_001128592	CCDS47360.1	PSMG4	RefSeq	938	chr6	+	3259161	3268300	CAGCGCCTAGGGCTCGGAGGGAAGACTGGCCTGGCCTGTGAGTGTGGCGTAGAGTGGGGA	389362	proteasome assembly chaperone 4 isoform a	6.08571	4.37545
ASHGA5P030201	0.0047475	0.0338278	3.26797	up	protein_coding	NM_001021	CCDS10320.1	RPS17	RefSeq	511	chr15	-	83205503	83209208	CATCATAGAAAAGTACTACACGCGCCTGGGCAACGACTTCCACACGAACAAGCGCGTGTG	6218	40S ribosomal protein S17	9.2496	7.54121
ASHGA5P015224	0.0102213	0.0443459	3.26329	up	protein_coding	ENST00000418107	CCDS4760.1	HLA-DMB	GENCODE	1397	chr6	-	32902405	32908847	GCTGGCGGAGAGCTGGCCACTCTAGTTACACTCCTCTTCCTGGGTCCAATTATTCAGAAG	3109	"major histocompatibility complex, class II, DM beta [Source:HGNC Symbol;Acc:4935]"	6.55286	4.84653
ASHGA5P007423	0.000182738	0.0167707	3.25993	up	protein_coding	ENST00000332797	CCDS5192.1	CCDC28A	GENCODE	1496	chr6	+	139094656	139114456	CAAGCATTTGGAAATGAATGTTCCATTGAACAGATGGAACATGTTCGGGGAATGCAGGAG	25901	coiled-coil domain containing 28A [Source:HGNC Symbol;Acc:21098]	5.11831	3.41347
ASHGA5P014257	0.0106595	0.0455995	3.25232	up	protein_coding	NM_014660	CCDS47542.1	PHF14	RefSeq	8370	chr7	+	11013498	11147376	TTGGAGATGCCTCAGATTCTGAAGGGAGTGGTAATGGAAGTGAAGATGCTTCAAAGGACA	9678	PHD finger protein 14	5.61846	3.91699
ASHGA5P003070	0.0153375	0.054966	3.25195	up	protein_coding	NM_014497	CCDS1917.1	ZNF638	RefSeq	6526	chr2	+	71558884	71662191	GTCCCTGAGGAATTAGACTTTCTTGTACCTAAGGCTGGATTCTTCTGTCCAATTTGTTCC	27332	zinc finger protein 638 isoform 1	6.73961	5.03831
ASHGA5P004751	0.00589543	0.0347605	3.24514	up	protein_coding	NM_023039	CCDS4020.1	ANKRA2	RefSeq	2198	chr5	-	72848024	72861511	ACTTCAGAATGGTGCTGATCCCCAACTTTTAGGAAAAGGTCGAGAAAGTGCACTGTCGTT	57763	ankyrin repeat family A protein 2	5.63331	3.93503
ASHGA5P012543	0.0315403	0.0864641	3.2448	up	protein_coding	NM_203391	CCDS14225.1	GK	RefSeq	4503	chrX	+	30671475	30749577	CCAGAAAGTGGTATTCCATAAAACCTACCAACTCATGGATTCCCAAGATGTGAGCTTTTT	2710	glycerol kinase isoform a	4.90977	3.21164
ASHGA5P055720	0.0459472	0.111391	3.24405	up	protein_coding	NM_003440	CCDS9282.1	ZNF140	RefSeq	3067	chr12	+	133657036	133684258	TAACAGTCTCTCATCAAGAAGCCCTGGCTCAACATATGAATATCAGTACTGTGGAGAGGC	7699	zinc finger protein 140	5.1528	3.455
ASHGA5P002311	0.00207195	0.0301527	3.24198	up	protein_coding	NM_032864	CCDS567.1	PRPF38A	RefSeq	2780	chr1	+	52870218	52883992	CTCCCGAAAGGTCTAAGAAGAGCCACAAGAAGAGCCGGAGAGGGAATGAGTAATGGACTC	84950	pre-mRNA-splicing factor 38A	5.02151	3.32463
ASHGA5P001234	0.00606329	0.0348634	3.23796	up	protein_coding	NM_018465	CCDS6463.1	PLGRKT	RefSeq	1020	chr9	-	5357966	5437937	AGAATGAAAGGTGAAGCTGAGGACATACTGGAAACAGAAAAGAGTAAATTGCAGCTGCCA	55848	plasminogen receptor (KT)	6.31812	4.62304
ASHGA5P053982	0.00904843	0.0416146	3.23728	up	protein_coding	NM_001029896	CCDS35250.1	WDR45	RefSeq	1655	chrX	-	48932091	48937564	ATGATGACTTTTAAGGACCCTGGGGGCTGTGCTAGGGACCTGCAGTGGCAGAACTGCAGA	11152	WD repeat domain phosphoinositide-interacting protein 4 isoform 2	6.12088	4.4261
ASHGA5P017336	0.00374227	0.0329783	3.23601	up	protein_coding	ENST00000457378	CCDS55078.1	SUN1	GENCODE	1309	chr7	+	856251	883509	CCCAGGACAGTATGGTTTGAAGTGGTGAACATGGATTTTTCTCGGCTTCACATGTACAGT	23353	Sad1 and UNC84 domain containing 1 [Source:HGNC Symbol;Acc:18587]	4.87444	3.18022
ASHGA5P007721	0.0159763	0.0563923	3.23244	up	protein_coding	NM_033082	CCDS8892.1	SARNP	RefSeq	941	chr12	-	56151053	56211540	AGATGAAACAGAGGAAGAAGAAACAAAGCCCATTGAGCTCCCTGTCAAAGAGGAAGAACC	84324	SAP domain-containing ribonucleoprotein	5.02687	3.33425
ASHGA5P054342	0.00584022	0.0347584	3.22447	up	protein_coding	NM_012341	CCDS31132.1	GTPBP4	RefSeq	2537	chr10	+	1034348	1063708	ACTTGCTGTCTGGGAAGAGGAAAGCTGGTAAAAAGGACAGGAGATAGTATCCGTTTGGTT	23560	nucleolar GTP-binding protein 1	5.28604	3.59698
ASHGA5P055344	0.00456092	0.0336682	3.22137	up	protein_coding	NM_018169	CCDS8725.2	C12orf35	RefSeq	6246	chr12	+	32112352	32146043	TGCTAGCAACCTGTCTTTCCCTGTGGAAAAAGCAACCTTCAGATACTGCAAAAGAAAAGG	55196	uncharacterized protein C12orf35	4.98386	3.29619
ASHGA5P002189	0.0231773	0.0706864	3.22092	up	protein_coding	NM_005455	CCDS660.1	ZRANB2	RefSeq	3162	chr1	-	71528973	71546972	GTCACCCGAAAGCCAGGTGATTGGTGAAAACACTAAACAACCCTGAGCCCAGGGCCAACC	9406	zinc finger Ran-binding domain-containing protein 2 isoform 2	7.36667	5.67919
ASHGA5P004065	0.0048322	0.0338278	3.21619	up	protein_coding	NM_022488	CCDS2966.1	ATG3	RefSeq	1372	chr3	-	112251358	112280485	TCAGTTCACCCATGCAGGCATGCTGAGGTGATGAAGAAAATCATTGAGACTGTTGCAGAA	64422	ubiquitin-like-conjugating enzyme ATG3	7.12572	5.44037
ASHGA5P054195	0.00527509	0.0340831	3.21603	up	protein_coding	ENST00000393600	CCDS14751.1	FAM50A	GENCODE	1352	chrX	+	153672472	153679002	ACATCTTTCCCGCCAGCCGCTGGGAACCCTACGACCCTGAAAAGAAGTGGGACAAGTACA	9130	"family with sequence similarity 50, member A [Source:HGNC Symbol;Acc:18786]"	8.37373	6.68844
ASHGA5P041478	0.0204217	0.0653789	3.21341	up	protein_coding	NM_006118	CCDS1064.1	HAX1	RefSeq	1196	chr1	+	154245038	154248355	TATTCCTGGGACGTTGGTTCCGGTCCCGGTAGCCTTGTTAACCCTCAGAGGCCTTCAAGT	10456	HCLS1-associated protein X-1 isoform a	7.63878	5.95468
ASHGA5P012429	0.0134783	0.0516038	3.20886	up	protein_coding	NM_015864	CCDS47384.1	FAM65B	RefSeq	2452	chr6	-	24839594	24877583	TATTCTAAAAAAGTAGAGAAGATCCTCTAATGGATCCCAGTGTGCCCATCCCTCAACCTC	9750	protein FAM65B isoform 2	7.14682	5.46476
ASHGA5P035831	0.00474011	0.0338278	3.20817	up	protein_coding	ENST00000318522	CCDS1807.1	EML4	GENCODE	5549	chr2	+	42396489	42559688	ACAACCTCTCCAAATACACAGACAAACTCCAGAAAGCAAGAATGCTACTCCCACCAAAAG	27436	echinoderm microtubule associated protein like 4 [Source:HGNC Symbol;Acc:1316]	6.5173	4.83555
ASHGA5P046826	0.00159362	0.0280187	3.20642	up	protein_coding	NM_001001722	CCDS35473.1	CDY2B	RefSeq	1960	chrY	+	20137667	20139627	AACCCCTTATACGACCTTTGGACAGAGTCCAGATGGCTGTTCTTCTATTACATTCCCCAA	203611	testis-specific chromodomain protein Y 2	6.94363	5.26267
ASHGA5P053808	0.00767173	0.0384959	3.20135	up	protein_coding	NM_012482	CCDS1402.1	ZNF281	RefSeq	3535	chr1	-	200375419	200379166	TTACAGGTAAGGTCCCAAAAGTGGCCAGGCTGGAGGTCTTCTAATGTAATTTTGTTTTAT	23528	zinc finger protein 281	5.21732	3.53864
ASHGA5P008242	0.00492113	0.0338278	3.19778	up	protein_coding	NM_001135553	CCDS44134.1	MKNK1	RefSeq	2704	chr1	-	47023078	47069966	CTTTGAAGATGACACAAGGTTTTACTTGGTCTTTGAGAAATTGCAAGGAGGTTCCATCTT	8569	MAP kinase-interacting serine/threonine-protein kinase 1 isoform 3	5.47371	3.79664
ASHGA5P048745	0.0109224	0.0461114	3.1964	up	protein_coding	NM_000942	CCDS10191.1	PPIB	RefSeq	1045	chr15	-	64448013	64455354	ACAGTCAAGACAGCCTGGCTAGATGGCAAGCATGTGGTGTTTGGCAAAGTTCTAGAGGGC	5479	peptidyl-prolyl cis-trans isomerase B precursor	7.72611	6.04966
ASHGA5P054742	0.00344904	0.0328172	3.19333	up	protein_coding	NM_014267	CCDS7822.1	C11orf58	RefSeq	3980	chr11	+	16760147	16779901	CAAAAAGCAATTATAAAATGATGTTTGTTAAATCCAGTGGTTCATAACTCCCAAACGCTT	10944	small acidic protein	6.4013	4.72624
ASHGA5P015517	0.0140933	0.0526662	3.18767	up	protein_coding	NM_001082969	CCDS8356.2	C11orf57	RefSeq	3199	chr11	+	111944967	111955874	GCGGCGCACGATTGAAGAATGTCCCGGATTCCACTGGGGAAGGTCCTCCTGAGGAATGTC	55216	uncharacterized protein C11orf57 isoform a	5.09964	3.42713
ASHGA5P000717	0.0408719	0.102653	3.18248	up	protein_coding	NM_014716	CCDS11101.1	ACAP1	RefSeq	2523	chr17	+	7239847	7254793	ATCGCCATGGAAACAGCCAACGCTGACATCGTCACCCTGCTACGACTGGCAAAGATGAGG	9744	"arf-GAP with coiled-coil, ANK repeat and PH domain-containing protein 1"	6.53089	4.86073
ASHGA5P051582	0.00965219	0.0431556	3.18195	up	protein_coding	NM_173359	CCDS33786.1	EIF4E3	RefSeq	6185	chr3	-	71728439	71803924	GCGACTGTTTTAGAAAAGATCTATGAACTTCTGCCCCACATAACTTTTAAAGCAGTATTT	317649	eukaryotic translation initiation factor 4E type 3 isoform b	9.31222	7.6423
ASHGA5P038876	0.00664405	0.0360365	3.17363	up	protein_coding	NM_174907	CCDS2917.1	PPP4R2	RefSeq	1495	chr3	+	73046118	73115011	ACAGAAGTCACCGATGAACCAATGGAACAAGACTAACTATTTAGAAACATTTAGATGCAG	151987	serine/threonine-protein phosphatase 4 regulatory subunit 2	5.50113	3.83499
ASHGA5P001531	0.000590701	0.0227075	3.17244	up	protein_coding	NM_000983	CCDS58.1	RPL22	RefSeq	2099	chr1	-	6245079	6259679	TTTCTAACTCCGCTGCCGCCATGGCTCCTGTGAAAAAGCTTGTGGTGAAGGGGGGCAAAA	6146	60S ribosomal protein L22 proprotein	10.9091	9.24352
ASHGA5P055315	0.00454965	0.033633	3.17066	up	protein_coding	NM_015954	CCDS44838.1	DERA	RefSeq	1741	chr12	+	16064185	16190315	GATCTTCCAATGTCTTAAATCAGTCACCAGTTCCAGAAAAGTTCTTTACGACAATGTTTA	51071	putative deoxyribose-phosphate aldolase	5.28678	3.622
ASHGA5P010094	0.00895247	0.041362	3.16129	up	protein_coding	ENST00000359204	CCDS7430.1	FRA10AC1	GENCODE	3089	chr10	-	95427639	95462329	GGCCTCCAAGAAAAAAGATAAAGGACATTCATCTTCAAAGAAATCTGAAGATTCTCTACT	118924	"fragile site, folic acid type, rare, fra(10)(q23.3) or fra(10)(q24.2) candidate 1 [Source:HGNC Symbol;Acc:1162]"	5.96687	4.30636
ASHGA5P029550	0.00797374	0.0392219	3.15821	up	protein_coding	NM_002806	CCDS9710.2	PSMC6	RefSeq	1599	chr14	+	53173895	53194716	GGTCGTCGGTTTTCTGAGGGTACTTCAGCTGACAGAGAGATTCAGAGAACGTTAATGGAG	5706	26S protease regulatory subunit 10B	5.70442	4.04531
ASHGA5P027066	0.0158285	0.0561465	3.15672	up	protein_coding	NM_002261	CCDS41755.1	KLRC3	RefSeq	1042	chr12	-	10564913	10573194	TGTGCAATGCTACATGTACGTGGACTTATATCAGACCAGTGTGGATCTTCAAGAATCATT	3823	NKG2-E type II integral membrane protein isoform E	5.79763	4.1392
ASHGA5P019052	0.021857	0.0681744	3.15419	up	protein_coding	NM_015952	CCDS34520.1	RWDD1	RefSeq	1081	chr6	+	116892582	116914436	TCCTTCACAGTATTATCAGAAAATCCACCCAGCTTCACCATTACTGTGACGTCTGAGGCT	51389	RWD domain-containing protein 1 isoform a	5.60804	3.95078
ASHGA5P010935	0.028978	0.0816142	3.15416	up	protein_coding	NM_144772	CCDS1145.1	APOA1BP	RefSeq	1121	chr1	+	156561557	156564091	GCCCGCAGAGCCCATGACGATTGATGAACTGTATGAGCTGGTGGTGGATGCCATCTTTGG	128240	NAD(P)H-hydrate epimerase precursor	5.86289	4.20564
ASHGA5P008665	0.0040307	0.0330909	3.14763	up	protein_coding	NM_181641	CCDS10809.1	CKLF	RefSeq	792	chr16	+	66586465	66600190	TTAATGAAGTGGTTATTTTGGCCTTTGCTTGTGTTTGCACTTGTGACAGCAGTATGCTGT	51192	chemokine-like factor isoform d	6.83178	5.17751
ASHGA5P007333	0.00540096	0.0342588	3.14187	up	protein_coding	NM_033318	CCDS14031.1	C22orf32	RefSeq	1585	chr22	+	42475694	42480288	TGACTAACAGGAATTACAGAAAGGAGAAAGCACTAACTGAAGAAATGGTGATGCTCTCAG	91689	"UPF0466 protein C22orf32, mitochondrial precursor"	6.18686	4.53523
ASHGA5P007042	0.00690282	0.0366228	3.14019	up	protein_coding	NM_080422	CCDS11863.1	PTPN2	RefSeq	1721	chr18	-	12785476	12884334	AAAGAAAAAGGCCAAGATTGACAGACACCTAATATTCATGACTTGAGAATATTCTGCAGC	5771	tyrosine-protein phosphatase non-receptor type 2 isoform 2	7.6737	6.02285
ASHGA5P000858	0.0062426	0.0353305	3.13767	up	protein_coding	NM_006263	CCDS9612.1	PSME1	RefSeq	1012	chr14	+	24605377	24608176	CAATGCTTATGCTGTGTTATATGACATCATCCTGAAGAACTTCGAGAAGCTCAAGAAGCC	5720	proteasome activator complex subunit 1 isoform 1	8.70193	7.05224
ASHGA5P002529	0.00494963	0.0338278	3.13722	up	protein_coding	ENST00000260605	CCDS1813.1	DYNC2LI1	GENCODE	1399	chr2	+	44001177	44037149	GAAGGATCTGGAACTGGAACAGTACAAAAGAAGTTCTTCCAAGTCTTGGAAACAAATCGA	51626	"dynein, cytoplasmic 2, light intermediate chain 1 [Source:HGNC Symbol;Acc:24595]"	5.41564	3.76616
ASHGA5P010838	0.00463414	0.0338278	3.13672	up	protein_coding	NM_197972	CCDS44274.1	NME7	RefSeq	1615	chr1	-	169101772	169337186	CCTATTAGAGGTTCAATACTTCTTCAAGATCTTGGATAATTAGTGGTGTGGAAAGTAAAG	29922	nucleoside diphosphate kinase 7 isoform b	5.6342	3.98495
ASHGA5P000909	0.0396377	0.100746	3.13636	up	protein_coding	NM_005008	CCDS14022.1	NHP2L1	RefSeq	1752	chr22	-	42069936	42084913	AGACGCTATGACTGAGGCTGATGTGAATCCAAAGGCCTATCCCCTTGCCGATGCCCACCT	4809	NHP2-like protein 1	7.90341	6.25432
ASHGA5P009977	0.00274801	0.0318783	3.13613	up	protein_coding	NM_145112	CCDS9772.1	MAX	RefSeq	2041	chr14	-	65541844	65569227	GGAGAGCGACGCTGACAAACGGGCTCATCATAATGCACTGGAACGAAAACGTAGGGACCA	4149	protein max isoform b	4.56644	2.91745
ASHGA5P033319	0.00252759	0.0314036	3.13528	up	protein_coding	NM_181671		PITPNC1	RefSeq	6383	chr17	+	65373396	65693379	AAACCAACATAAAAGTTTGCAATCAGCATTCCTCCCCTGTGGATGACATAGAGAGTCATG	26207	cytoplasmic phosphatidylinositol transfer protein 1 isoform b	7.18552	5.53692
ASHGA5P048932	0.0103278	0.0445718	3.13083	up	protein_coding	NM_018445	CCDS53979.1	VIMP	RefSeq	1250	chr15	-	101812389	101817700	TAAGAATCTTGTTAGTGTCACTTTTGACATTAGCAAGATGAACCCTTAACCCTCGATTCA	55829	selenoprotein S	6.74984	5.1033
ASHGA5P019520	0.0100894	0.0440928	3.12337	up	protein_coding	NM_001166703	CCDS55422.1	FAM104B	RefSeq	1405	chrX	-	55171677	55187535	TTCTTTGGTTGAAAAGAAGAAGAAATGGCAGTAAAGAGGGCAACCATCATTCCACCCAGC	90736	protein FAM104B isoform 6	4.5291	2.886
ASHGA5P010887	0.00512101	0.0338278	3.12022	up	protein_coding	NM_001113206	CCDS44257.1	TSTD1	RefSeq	476	chr1	-	161007421	161008774	ATGGCTGGAGTGTCCGAGTTGGAGAGTGCTCTGCAGATGGAGCCAGCTGCCTTCCAGGCT	100131187	thiosulfate sulfurtransferase/rhodanese-like domain-containing protein 1 isoform 2	5.80532	4.16367
ASHGA5P050021	0.00417356	0.0330909	3.11986	up	protein_coding	NM_014177	CCDS12003.1	TIMM21	RefSeq	1562	chr18	+	71815745	71826204	TCCCAAGATGATTAAAATAGGGTTTCTGATGGATGTTGAATGGCGTGGACTCGCTACTCC	29090	mitochondrial import inner membrane translocase subunit Tim21 precursor	6.29034	4.64886
ASHGA5P006810	0.00999299	0.0439495	3.11879	up	protein_coding	NM_018155	CCDS3114.1	SLC25A36	RefSeq	4674	chr3	+	140660661	140698785	TCAGCTGCAATGGCAGGTTTTACTGCAATCACAGCAACCAACCCCATTTGGCTTATAAAG	55186	solute carrier family 25 member 36 isoform b	6.18411	4.54312
ASHGA5P032505	0.0015768	0.0280187	3.11802	up	protein_coding	NM_024015	CCDS11529.1	HOXB4	RefSeq	2042	chr17	-	46652868	46655743	TTTGATCAACTCAAACTATGTCGACCCCAAGTTCCCTCCATGCGAGGAATATTCACAGAG	3214	homeobox protein Hox-B4	6.66663	5.026
ASHGA5P011602	0.00882652	0.0410762	3.11593	up	protein_coding	NM_031207	CCDS488.2	HYI	RefSeq	1251	chr1	-	43916673	43919660	TTCGTGGGCTGAGACACAGTAGAGGGCTTGAGTTGGCTACGTTCATACTGGGATAGGCGG	81888	putative hydroxypyruvate isomerase isoform 1	5.91326	4.2736
ASHGA5P005669	0.0229664	0.0703693	3.11218	up	protein_coding	NM_014547	CCDS10145.1	TMOD3	RefSeq	4682	chr15	+	52121824	52204331	ACAGAACTGAAACAACTGGAAACTGTTTTGGATGATCTTGACCCCGAGAATGCCCTTCTG	29766	tropomodulin-3	8.48668	6.84875
ASHGA5P007104	0.0165211	0.0573622	3.10659	up	protein_coding	ENST00000328178	CCDS32977.1	ZNF85	GENCODE	2331	chr19	+	21106058	21133503	AAACCCACAGTTATGTGTTCTCATTTTGCCCAAGACCTTTGGCCGGAGCAGAATATAAAA	7639	zinc finger protein 85 [Source:HGNC Symbol;Acc:13160]	6.25648	4.62115
ASHGA5P017331	0.0380939	0.0981194	3.10367	up	protein_coding	NM_001131062	CCDS47321.1	SAP30L	RefSeq	6120	chr5	+	153825516	153840613	CGACAAGAGCGTTGATCTGTTCCAGCTGCAGGTGAACACCCTACGACGTTATAAACGACA	79685	histone deacetylase complex subunit SAP30L isoform 2	5.78138	4.14741
ASHGA5P054797	0.0168437	0.0580272	3.10326	up	protein_coding	NM_005898	CCDS31453.1	CAPRIN1	RefSeq	5562	chr11	+	34073229	34124157	CCCCCAAGACCCAACAGAGGGATGCCGCAAATGAACACTCAGCAAGTGAATTAATCTGAT	4076	caprin-1 isoform 1	7.50406	5.87028
ASHGA5P012813	0.0364456	0.0952956	3.09799	up	protein_coding	NM_203433	CCDS13661.1	PSMG1	RefSeq	1077	chr21	-	40547371	40555440	CAATCCCTCGGTTTTTGGCTCTTGTCCAAGGAAGAACATGCAGATAACTATTCTCACATG	8624	proteasome assembly chaperone 1 isoform b	5.27308	3.64175
ASHGA5P053620	0.00532918	0.0341221	3.09757	up	protein_coding	NM_014066	CCDS6436.1	COMMD5	RefSeq	1475	chr8	-	146075550	146078452	AGAAGAGGTGTGAGCGCAGACTGCAGGACTGACCCCTCACTTGACCAGTCCCATTCAGAT	28991	COMM domain-containing protein 5	9.27178	7.64065
ASHGA5P012808	0.00596367	0.0347809	3.09747	up	protein_coding	ENST00000380851	CCDS13031.1	IDH3B	GENCODE	1230	chr20	-	2639040	2644865	AGTTGGCAAGGTTCGAACCTCTGACATGGGTGGCTATGCTACTTGCCATGACTTCACTGA	3420	isocitrate dehydrogenase 3 (NAD+) beta [Source:HGNC Symbol;Acc:5385]	7.2927	5.66161
ASHGA5P003220	0.00431796	0.0334484	3.09713	up	protein_coding	NM_002485	CCDS6249.1	NBN	RefSeq	4639	chr8	-	90945563	90996899	GGAAATGGAGGTACAAAATCAACATGCAAAAGAAGAGTCTCTTGCTGATGATCTTTTTAG	4683	nibrin	6.43618	4.80525
ASHGA5P053383	0.00405521	0.0330909	3.09485	up	protein_coding	NM_001135694	CCDS47850.1	VDAC3	RefSeq	1557	chr8	+	42249278	42263455	AGGTCACAAGGTTGGCTTGGGATTTGAACTGGAAGCTTAATGTGGTTTGAGGAAAGCATC	7419	voltage-dependent anion-selective channel protein 3 isoform 2	6.20402	4.57415
ASHGA5P054322	0.00244615	0.0313471	3.09312	up	protein_coding	NM_001126	CCDS1624.1	ADSS	RefSeq	2791	chr1	-	244571793	244615436	TGATTCAACTCTTTTAATGATTGCCAGTAATGCAAGAAACACTCCTTGAGAGGGAGGGGA	159	adenylosuccinate synthetase isozyme 2	7.22259	5.59352
ASHGA5P004850	0.0046319	0.0338278	3.09258	up	protein_coding	ENST00000373758	CCDS44411.1	REEP3	GENCODE	5205	chr10	+	65281122	65384883	AAATCTGTGAAAACCACCAAAGGCCGCAAAGAGGTGCGGTACGGGTCACTAAAATACAAA	221035	receptor accessory protein 3 [Source:HGNC Symbol;Acc:23711]	6.27214	4.64333
ASHGA5P005219	0.0335111	0.0900495	3.08941	up	protein_coding	NM_016463	CCDS43370.1	CXXC5	RefSeq	1447	chr5	+	139028300	139062680	TTCAGAAAATGTGAGGAACTCAAAAAGAAGCCTTCCGCTGCTCTGGAGAAGGTGATGCTT	51523	CXXC-type zinc finger protein 5	4.97054	3.34321
ASHGA5P036159	0.00934484	0.0423281	3.08797	up	protein_coding	NM_013310	CCDS2168.1	C2orf27A	RefSeq	1222	chr2	+	132480063	132524977	AAGCTGGACTAATTGAACAAGTATTGCTGAAAATGAGTGCTGTAGATGACATGATAGCAG	29798	uncharacterized protein C2orf27	5.64833	4.02168
ASHGA5P009559	0.00119851	0.0262588	3.08687	up	protein_coding	NM_007309	CCDS14468.1	DIAPH2	RefSeq	3782	chrX	+	95939661	96724837	AGGAATCCAGTGGTAAATCATCCCTGTGCAACAAGGGCTAATCCAAGATCAGCTACATAA	1730	protein diaphanous homolog 2 isoform 12C	7.36076	5.73461
ASHGA5P007219	0.0171565	0.0587078	3.08108	up	protein_coding	ENST00000396265	CCDS14046.1	TSPO	GENCODE	654	chr22	+	43547534	43559247	TCTTCTTTGGTGCCCGACAAATGGGCTGGGCCTTGGTGGATCTCCTGCTGGTCAGTGGGG	706	translocator protein (18kDa) [Source:HGNC Symbol;Acc:1158]	6.53587	4.91243
ASHGA5P053159	0.00869854	0.0407732	3.0805	up	protein_coding	NM_002069	CCDS5595.1	GNAI1	RefSeq	3318	chr7	+	79764139	79848725	ACCGCAACCTCCGTGAGGACGGCGAGAAGGCGGCGCGCGAGGTCAAGCTGCTGCTGCTCG	2770	guanine nucleotide-binding protein G(i) subunit alpha-1 isoform 1	5.41315	3.78999
ASHGA5P030100	0.016976	0.0583451	3.07786	up	protein_coding	ENST00000204549	CCDS10201.1	PDCD7	GENCODE	2851	chr15	-	65409716	65426174	CATTAAAAAGCGCTCTGAACTGTATGAAGCTGAAGAGAGAGCCCTCAGAGTTATGCTAGA	10081	programmed cell death 7 [Source:HGNC Symbol;Acc:8767]	5.29226	3.67033
ASHGA5P012838	0.0211944	0.066865	3.07498	up	protein_coding	NM_005869	CCDS3982.2	CWC27	RefSeq	2093	chr5	+	64064754	64314590	GGAAGATCAGACCCTTGCACTGCTGAACCAGTTTAAATCTAAACTCACTCAAGCAATTGC	10283	peptidyl-prolyl cis-trans isomerase CWC27 homolog	8.32473	6.70415
ASHGA5P014096	0.013655	0.0518462	3.0747	up	protein_coding	ENST00000399598	CCDS43741.1	UBXN2B	GENCODE	5068	chr8	+	59323822	59364060	GGATTTGCAGTTGGCCTTGGCAGAATTGTATGAAGATGAAGTGAAGTGCAAATCTTCCAA	137886	UBX domain protein 2B [Source:HGNC Symbol;Acc:27035]	6.28281	4.66237
ASHGA5P052217	0.00530825	0.0340831	3.07076	up	protein_coding	NM_015384	CCDS47198.1	NIPBL	RefSeq	10389	chr5	+	36876860	37065921	GGAGGAGTCAACGTATTTCGCAGCGTATTACGTAAAATGATTTTTATGTGCTTATATATG	25836	nipped-B-like protein isoform B	6.41089	4.7923
ASHGA5P051765	0.00505708	0.0338278	3.06989	up	protein_coding	NM_014373	CCDS3211.1	GPR160	RefSeq	2021	chr3	+	169755734	169803183	GATTTGTTAATATTATTAATTAAAAGTTACAGCTGTCATAAGATCATAATTTTATGAACA	26996	probable G-protein coupled receptor 160	4.83689	3.21871
ASHGA5P007342	0.0309908	0.0853713	3.06946	up	protein_coding	NM_003720	CCDS13660.1	PSMG1	RefSeq	1140	chr21	-	40547371	40555440	AAATCCAATCCCTCGGTTTTTCTCTGTCAGTGCAGTTGCTATGTTGCAGAAGATCAACAG	8624	proteasome assembly chaperone 1 isoform a	6.90153	5.28355
ASHGA5P031792	0.00549625	0.0343796	3.06615	up	protein_coding	NM_032330	CCDS54010.1	CAPNS2	RefSeq	1040	chr16	+	55600583	55601592	CAACCCTACATATTTCTGATCATGTGCTGCCTTTTACTGCTGAATTAAAACAGATATTTC	84290	calpain small subunit 2	5.39971	3.78329
ASHGA5P003332	0.0341746	0.0910636	3.06572	up	protein_coding	NM_018638	CCDS8698.1	ETNK1	RefSeq	7101	chr12	+	22778075	22843608	GTCAATCAGTTTGCATTGGCTTCTCATTTCTTTTGGGGATTGTGGGCTTTGATTCAAGCC	55500	ethanolamine kinase 1 isoform A	4.71304	3.09682
ASHGA5P014235	0.0114085	0.0471474	3.06405	up	protein_coding	NM_001135592	CCDS33202.1	RPS27A	RefSeq	970	chr2	+	55459038	55462989	GCTTCTGGAAGTGGAGCCGCCACCAAAATGCAGATTTTCGTGAAAACCCTTACGGGGAAG	6233	ubiquitin-40S ribosomal protein S27a precursor	10.7973	9.18183
ASHGA5P053274	0.0095259	0.0428216	3.0593	up	protein_coding	NM_001166345	CCDS55155.1	MDFIC	RefSeq	5312	chr7	+	114562208	114659970	ATTGTCCTGGGACAAGCGTCATGTGGCATCTGCACCTCAGAAGCCTGCTGCTGTTGCTGT	29969	myoD family inhibitor domain-containing protein isoform p32	4.9548	3.34159
ASHGA5P003436	0.0031428	0.0324046	3.0593	up	protein_coding	NM_005849	CCDS10599.1	IGSF6	RefSeq	1062	chr16	-	21652604	21663987	CTCACAAAAGAAGAAGAGTGCTCGGCGTATTTTTCAGGAAATTGCTCAAGAACTATACCA	10261	immunoglobulin superfamily member 6 precursor	6.96024	5.34703
ASHGA5P049387	0.00416781	0.0330909	3.05803	up	protein_coding	NM_017702	CCDS45555.1	DEF8	RefSeq	932	chr16	+	90015138	90025774	ACCTGCACAGGTGGGCCGAGACCCAGACGAGGAGTGAGGAATGAGAGAGACCAAAGTTCC	54849	differentially expressed in FDCP 8 homolog isoform 2	5.84972	4.23712
ASHGA5P045676	0.0268498	0.0777263	3.05097	up	protein_coding	NM_016410	CCDS6537.1	CHMP5	RefSeq	2070	chr9	+	33264876	33282067	TTTGGATGAGGCAGCATCTGCACCTGCAATTCCAGAAGGTGTTCCCACTGATACAAAAAA	51510	charged multivesicular body protein 5 isoform 1	5.91705	4.30778
ASHGA5P012419	0.0233245	0.0709358	3.04899	up	protein_coding	NM_022343	CCDS6598.1	GLIPR2	RefSeq	1900	chr9	+	36136741	36163903	TTCACCTCGGGGACTGGACACTTCACGGCCATGGTATGGAAGAACACCAAGAAGATGGGC	152007	Golgi-associated plant pathogenesis-related protein 1	5.61428	4.00595
ASHGA5P028906	0.0046274	0.0338278	3.04839	up	protein_coding	ENST00000334163	CCDS921.1	POLR3C	GENCODE	1851	chr1	-	145592604	145610884	TTACAAGAAATAGAGGAGATGATCACAGCTCCTGAACGTCAGCAGCTAGAGACCCTGAAA	10623	polymerase (RNA) III (DNA directed) polypeptide C (62kD) [Source:HGNC Symbol;Acc:30076]	5.88079	4.27274
ASHGA5P003930	0.00434209	0.0334484	3.04293	up	protein_coding	NM_003677	CCDS45003.1	DENR	RefSeq	3061	chr12	+	123237370	123255953	ATGGCCAGAGGTAGATGATGACAGCATCGAAGATCTTGGAGAAGTAAAGAAGTGAATTTG	8562	density-regulated protein	4.88961	3.28415
ASHGA5P013480	0.041652	0.104023	3.03958	up	protein_coding	NM_020202	CCDS33806.1	NIT2	RefSeq	1271	chr3	+	100053561	100074478	TTCAGACATAGACCTGAAGAAGCTGGCTGAAATACGCCAGCAAATCCCCGTTTTTAGACA	56954	omega-amidase NIT2	7.20286	5.59899
ASHGA5P000673	0.0231828	0.0706864	3.03948	up	protein_coding	ENST00000037243	CCDS10921.1	GABARAPL2	GENCODE	1002	chr16	+	75600248	75611779	CACAGTCCAGCCTAACTATGGGACAGCTTTACGAGAAGGAAAAAGATGAAGATGGATTCT	11345	GABA(A) receptor-associated protein-like 2 [Source:HGNC Symbol;Acc:13291]	5.52518	3.92136
ASHGA5P055627	0.0409719	0.102854	3.03799	up	protein_coding	NM_002534	CCDS44980.1	OAS1	RefSeq	1470	chr12	+	113344738	113355831	TAAGAATTGGGATGGGTCCCCAGTGAGCTCCTGGATTCTGCTGGTGAGACCTCCTGCTTC	4938	2'-5'-oligoadenylate synthase 1 isoform 2	5.50231	3.89919
ASHGA5P055168	0.000494138	0.0213296	3.03698	up	protein_coding	NM_006476	CCDS8397.1	ATP5L	RefSeq	1343	chr11	+	118272103	118280562	ATTCAGCCGGCGGTTCGGGGCGACGGACTCTCCATTCCAGAACCATGGCCCAATTTGTCC	10632	"ATP synthase subunit g, mitochondrial"	7.78422	6.18158
ASHGA5P012496	0.0036646	0.0329783	3.03651	up	protein_coding	NM_002074	CCDS34.1	GNB1	RefSeq	3180	chr1	-	1716724	1822526	ACGCCAGTAGCATGTGGATGCCATGGAGACTGGAAGACCATTCCAACTTGGACGCGTTAC	2782	guanine nucleotide-binding protein G(I)/G(S)/G(T) subunit beta-1	6.86389	5.26147
ASHGA5P021988	0.0470372	0.112666	3.0331	up	protein_coding	NM_001142798	CCDS45595.1	C17orf49	RefSeq	913	chr17	+	6918055	6920843	AACTTCGACCAGGACAGCCTGACCCTGGATTCTGGCCTTCTCATGACCTCTGCTGATCCT	124944	chromatin complexes subunit BAP18 isoform 1	7.07125	5.47046
ASHGA5P008393	0.00516015	0.033892	3.03143	up	protein_coding	NM_177542	CCDS54281.1	SNRPD2	RefSeq	882	chr19	-	46190711	46195443	CCTTCGATAGGCACTGCAACATGGTGCTGGAGAACGTGAAGGAGATGTGGACTGAGGTAC	6633	small nuclear ribonucleoprotein Sm D2 isoform 2	7.75591	6.15592
ASHGA5P043555	0.00443922	0.0334484	3.02988	up	protein_coding	NM_001172428	CCDS55095.1	KLHL7	RefSeq	1032	chr7	+	23145352	23165669	TTCACTGTGTGATGATCCTTAGTGGCACATGAATGAACGTCCAGATGTTTGTGCAGTAGC	55975	kelch-like protein 7 isoform 3	5.89739	4.29813
ASHGA5P009468	0.0491116	0.116029	3.02793	up	protein_coding	NM_001003796	CCDS33653.1	NHP2L1	RefSeq	1520	chr22	-	42069936	42084913	CGCAGCCATGACTGAGGCTGATGTGAATCCAAAGGCCTATCCCCTTGCCGATGCCCACCT	4809	NHP2-like protein 1	7.68067	6.08234
ASHGA5P034515	0.0124905	0.0495527	3.02736	up	protein_coding	ENST00000263897	CCDS46011.1	USE1	GENCODE	856	chr19	+	17326154	17330638	TAGACCTCGTCCTGCAGCGACATCAGAACCTCCAGGAAAAGCTGGCGGAAGAGATGCTAG	55850	unconventional SNARE in the ER 1 homolog (S. cerevisiae) [Source:HGNC Symbol;Acc:30882]	7.24301	5.64495
ASHGA5P005054	0.00696874	0.036818	3.02388	up	protein_coding	NM_000732	CCDS8394.1	CD3D	RefSeq	771	chr11	-	118209788	118213459	TACAAGGACAAAGAATCTACCGTGCAAGTTCATTATCGAATGTGCCAGAGCTGTGTGGAG	915	T-cell surface glycoprotein CD3 delta chain isoform A precursor	7.8958	6.2994
ASHGA5P010989	0.0287094	0.0812569	3.02383	up	protein_coding	NM_001033564	CCDS34513.1	C6orf225	RefSeq	2682	chr6	+	112408673	112423993	GCCTCTTTTGGTTTTCAGTGAAGTATGCCTTTTCAATTTGGAACCCAGCCAAGGAGGTTT	619208	UPF0731 protein C6orf225	4.59369	2.99731
ASHGA5P005454	0.00600339	0.0347908	3.02365	up	protein_coding	NM_014463	CCDS2619.1	LSM3	RefSeq	695	chr3	+	14220227	14239869	GATATATAAATCAACGAAACGGAATATTCCAATGCTCTTTGTCCGGGGAGATGGCGTTGT	27258	U6 snRNA-associated Sm-like protein LSm3	7.72418	6.12789
ASHGA5P017599	0.0237546	0.0717711	3.02301	up	protein_coding	NM_001143681	CCDS47732.1	GSTK1	RefSeq	929	chr7	+	142960521	142966222	AAAGACAGTGGAAGTTTGTCTGCCATGCGTTTCCTCACCGCCGTGAACTTGGAGCATCCA	373156	glutathione S-transferase kappa 1 isoform d	5.47207	3.87609
ASHGA5P053407	0.00334497	0.032685	3.00631	up	protein_coding	NM_001011670	CCDS55233.1	CHCHD7	RefSeq	1619	chr8	+	57124314	57131176	TATCTGTAAGGAATCTGATGCTTCCACCAGATGTCTGGATGAAAATAACTATGACAGGGA	79145	coiled-coil-helix-coiled-coil-helix domain-containing protein 7 isoform e	6.73391	5.14592
ASHGA5P002418	0.0194414	0.0631789	3.00557	up	protein_coding	NM_004507	CCDS34635.1	HUS1	RefSeq	3033	chr7	-	48002884	48019222	GAACCACTTCACACGAATCAGTAACATGATAGCCAAGCTTGCCAAAACCTGCACCCTCCG	3364	checkpoint protein HUS1	5.38545	3.79781
ASHGA5P012111	0.00264508	0.0317647	3.00442	up	protein_coding	NM_001288	CCDS4719.1	CLIC1	RefSeq	1265	chr6	-	31698357	31704341	AACAAGATTGAGGAATTTCTGGAGGCAGTGCTGTGCCCTCCCAGGTACCCCAAGCTGGCA	1192	chloride intracellular channel protein 1	6.46225	4.87517
ASHGA5P002983	0.00451337	0.033633	3.00338	up	protein_coding	NM_001005753	CCDS42707.1	CHMP3	RefSeq	3133	chr2	-	86730552	86790620	ACATGAACTCAGTGCTCATGGGGATGAAGAACCAGCTCGCGGTCTTGCGAGTGGCTGGTT	51652	charged multivesicular body protein 3 isoform 2	5.79722	4.21063
ASHGA5P006901	0.00300483	0.0321046	3.00196	up	protein_coding	NM_152773	CCDS33929.1	TCTEX1D2	RefSeq	695	chr3	-	196018089	196045165	TAGTGATTGGAGAACAAAGAGGTGAAGGAGTATTCATGGCTTCTCGCTGTTTCTGGGATG	255758	tctex1 domain-containing protein 2	6.27439	4.68848
ASHGA5P034579	0.00602666	0.0348208	3.00176	up	protein_coding	NM_005306	CCDS12461.1	FFAR2	RefSeq	2069	chr19	+	35940616	35942669	CCTCATACAGGGGAAAGCAACCTGGTCTAGCAAATTGAAAATAAAGATGATAAAACTCTG	2867	free fatty acid receptor 2	8.41652	6.83071
ASHGA5P009529	0.00572978	0.0346211	2.9993	up	protein_coding	NM_021047	CCDS42532.1	ZNF253	RefSeq	2351	chr19	+	19976713	20004293	AAACCCCCAGTTATGAGTTCTCATTTTGCCCAAGACCTTTGGCCAGAGAACATACAAAAT	56242	zinc finger protein 253	8.64292	7.05829
ASHGA5P030941	0.00528554	0.0340831	2.99852	up	protein_coding	ENST00000344836	CCDS32385.1	USP7	GENCODE	5412	chr16	-	8985950	9057341	AAAGGCCATTAAAATCCATAACTGATTTCCAAGCTGGTGTGTTCAAGGCGAGGACGGTGT	7874	ubiquitin specific peptidase 7 (herpes virus-associated) [Source:HGNC Symbol;Acc:12630]	6.38399	4.79974
ASHGA5P002858	0.00640149	0.035479	2.99793	up	protein_coding	NM_019107	CCDS12133.1	C19orf10	RefSeq	1067	chr19	-	4657556	4670415	AAGTGATGTCCCTCTGAAAACTGAGGAATTTGAAGTGACCAAAACAGCAGTGGCTCACAG	56005	UPF0556 protein C19orf10 precursor	4.86917	3.2852
ASHGA5P052061	0.0188207	0.0619473	2.99756	up	protein_coding	NM_002966	CCDS1008.1	S100A10	RefSeq	1069	chr1	-	151955385	151966714	CTTTTCCCTAATTGCGGGCCTCACCATTGCATGCAATGACTATTTTGTAGTACACATGAA	6281	protein S100-A10	8.19372	6.60993
ASHGA5P013443	0.0271664	0.078383	2.99389	up	protein_coding	NM_001037738	CCDS43399.1	NPM1	RefSeq	1347	chr5	+	170814707	170833731	TATAGAAAAAGCGCATTGAACAGTCCTGGGCACTACATGTAAATTAAGCCCAAAGATGGG	4869	nucleophosmin isoform 3	7.19654	5.61452
ASHGA5P003000	0.00149248	0.0276811	2.99092	up	protein_coding	NM_005644	CCDS326.1	TAF12	RefSeq	1129	chr1	-	28929608	28969604	TCACAAACAGAGAATGGCATTGATCCGGAAAACAACCAAGAAATAACACACGGAAAGGTC	6883	transcription initiation factor TFIID subunit 12	5.88357	4.30298
ASHGA5P050811	0.00152845	0.0279696	2.98636	up	protein_coding	NM_015680	CCDS2433.1	CNPPD1	RefSeq	2100	chr2	-	220036618	220041702	TAATGTCTCCAGCTGCCTGGAAGGCAGCATGGGGCTGCGGTCACTCTGGGGCAGTCTTCT	27013	protein CNPPD1	5.76925	4.19086
ASHGA5P049346	0.00286943	0.0318783	2.98414	up	protein_coding	NM_001537	CCDS45534.1	HSBP1	RefSeq	1989	chr16	+	83841507	83846607	ACAAACGGAAGTGTAGGTTACGGTCTGAGACATCACCGCCAAGCTGGGCATCGGGGAGAT	3281	heat shock factor-binding protein 1	6.55534	4.97802
ASHGA5P014324	0.00649586	0.0356124	2.97968	up	protein_coding	NM_001127397	CCDS46283.1	ERLEC1	RefSeq	2527	chr2	+	54014067	54045956	AGACAGTCAGGTGCAAAGAATCAGATTCACCTCATGCTGTTACTGTATATATGCTAGAGC	27248	endoplasmic reticulum lectin 1 isoform 2 precursor	5.17367	3.59851
ASHGA5P005725	0.00404342	0.0330909	2.97819	up	protein_coding	NM_173060	CCDS4082.1	CAST	RefSeq	4304	chr5	+	96038492	96110385	TCCACGCAGAGTGTCAGCTTCCTCTGGTGCAACCAGCAAGTCTTCCAGTATGAATCCCAC	831	calpastatin isoform b	5.36897	3.79453
ASHGA5P010654	0.00520732	0.0340396	2.97471	up	protein_coding	NM_004578	CCDS31050.1	RAB4A	RefSeq	1861	chr1	+	229406878	229440518	AAATATGGGATACAGCAGGACAAGAACGATTCAGGTCCGTGACGAGAAGTTATTACCGAG	5867	ras-related protein Rab-4A	5.85497	4.28222
ASHGA5P003829	0.00594311	0.0347809	2.97136	up	protein_coding	NM_022079	CCDS41533.1	HERC4	RefSeq	4531	chr10	-	69681655	69835103	TATATCAACTGGGTCCAACAGCAGGCCTATGGAATGGATGTCAACCATGGATTAACTGAG	26091	probable E3 ubiquitin-protein ligase HERC4 isoform a	6.55569	4.98457
ASHGA5P016058	0.0490556	0.115973	2.9697	up	protein_coding	NM_001030018	CCDS45546.1	APRT	RefSeq	673	chr16	-	88875876	88878342	TGCTGGCCACTGGTGTATGAGTGACCACAGGGCCTCCCAGCCCAACATCTCCAGCTGGAT	353	adenine phosphoribosyltransferase isoform b	5.91947	4.34915
ASHGA5P054832	0.0158117	0.0561233	2.96892	up	protein_coding	NM_001143984	CCDS44593.1	PTPMT1	RefSeq	2568	chr11	+	47586981	47595013	ACCTCTTTGCCTCGGCAGCTGGTACAGGACGAGAACGTGCGCGGGGTGATCACCATGAAC	114971	protein-tyrosine phosphatase mitochondrial 1 isoform 2	4.71139	3.14145
ASHGA5P046549	0.00395436	0.0329783	2.96264	up	protein_coding	ENST00000374971	CCDS35304.1	PAGE2B	GENCODE	493	chrX	+	55101503	55105336	CAAGCAAGACAAATGAAGACTGAAACCAAGAACGTTATTCTTAATCTGGAAATTTGACTG	389860	"P antigen family, member 2B [Source:HGNC Symbol;Acc:31805]"	4.54533	2.97845
ASHGA5P055120	0.0075401	0.0381385	2.95675	up	protein_coding	NM_001017534	CCDS31661.1	CARD16	RefSeq	695	chr11	-	104912052	104916051	TTTTCTTAGAACCAATTTTATTGAGCGGTTCTGGAGGAACATACTTCTGCTCCCCTTGCA	114769	caspase recruitment domain-containing protein 16 isoform 1	7.09082	5.52681
ASHGA5P003310	0.0125996	0.0496689	2.94268	up	protein_coding	NM_018446	CCDS2862.1	GLT8D1	RefSeq	2118	chr3	-	52728503	52740048	ATGAAACTCAATGTAGAAGAGGGACTGTATAGCAGAACCCTGGCTGGTAGCATCACAACA	55830	glycosyltransferase 8 domain-containing protein 1	8.0734	6.51627
ASHGA5P053499	0.00483444	0.0338278	2.94079	up	protein_coding	NM_183009	CCDS47894.1	KIAA1429	RefSeq	3700	chr8	-	95523205	95565746	CAAACAACTCAGGTATCACTTCCATATAACATGCATCTTATAAATGACTGCAGTAACACT	25962	protein virilizer homolog isoform 2	4.78266	3.22646
ASHGA5P011350	0.0318366	0.0869022	2.94069	up	protein_coding	NM_016046	CCDS7459.1	EXOSC1	RefSeq	1150	chr10	-	99195665	99205768	GAAAAAGACAAGGTTGAAATTTATAAGAGTTTCCGCCCAGGTGACATTGTCTTGGCCAAA	51013	exosome complex component CSL4	4.79382	3.23766
ASHGA5P013342	0.00737934	0.0377476	2.94032	up	protein_coding	NM_001040651	CCDS41724.1	CD3D	RefSeq	639	chr11	-	118209788	118213459	CAAAGAATCTACCGTGCAAGTTCATTATCGAACTGCCGACACACAAGCTCTGTTGAGGAA	915	T-cell surface glycoprotein CD3 delta chain isoform B precursor	7.49422	5.93824
ASHGA5P029650	0.00624417	0.0353305	2.93811	up	protein_coding	NM_001024211	CCDS30874.1	S100A13	RefSeq	667	chr1	-	153591275	153600117	TTCAATGAGTACTGGAGATTGATTGGGGAGCTGGCCAAGGAAATCAGGAAGAAGAAAGAC	6284	protein S100-A13	5.42802	3.87313
ASHGA5P007630	0.00537337	0.0342414	2.93568	up	protein_coding	NM_181726	CCDS3841.1	ANKRD37	RefSeq	934	chr4	+	186317839	186321390	GGAAGTGCTGATGTCACGTGGGTTATGAAGAAGTCTGAAGAACGCCTTCATTTCATGCAA	353322	ankyrin repeat domain-containing protein 37	5.72937	4.17567
ASHGA5P042656	0.00353419	0.0328487	2.93331	up	protein_coding	NM_014320	CCDS5191.1	HEBP2	RefSeq	1282	chr6	+	138725335	138734582	CAGGCCTTTAGAGTCAGATGTCTTCATTGAAGATAGAGCCGAAATGACTGTGTTTGTACG	23593	heme-binding protein 2	7.43952	5.88699
ASHGA5P005209	0.0119407	0.0482123	2.93325	up	protein_coding	NM_152766	CCDS11102.1	C17orf61	RefSeq	490	chr17	-	7306292	7307450	GCCACTCTGGGCTGGGTTATTGCTAGCTTCCGGAACGACCTTATTCTGCACCAGCTTTTA	254863	UPF0451 protein C17orf61 precursor	6.12723	4.57473
ASHGA5P001786	0.00479042	0.0338278	2.93089	up	protein_coding	NM_001003805	CCDS32076.1	ATP5S	RefSeq	1687	chr14	+	50779046	50792946	GATCACATGGAAACCTCAAATATTTGTTGTTAAGTGATCTTCCTGGAGTAAGAGAAAAAG	27109	"ATP synthase subunit s, mitochondrial isoform b precursor"	6.30342	4.75208
ASHGA5P036764	0.00532103	0.0340914	2.93056	up	protein_coding	NM_015474	CCDS13288.1	SAMHD1	RefSeq	3189	chr20	-	35520226	35580246	CATGTTAGCTTCTATTGTAAGACTGCCCCCAACAGAGCAATCAGGATTACTAAAAACCAG	25939	SAM domain and HD domain-containing protein 1	7.16897	5.61779
ASHGA5P010893	0.0223321	0.0691297	2.93021	up	protein_coding	ENST00000368046	CCDS1208.1	CD48	GENCODE	1126	chr1	-	160648535	160681641	TGTACCCTGGCCCGGTCCTTTGGAGTAGAATGGATTGCAAGTTGGCTAGTGGTCACGGTG	962	CD48 molecule [Source:HGNC Symbol;Acc:1683]	10.1736	8.62255
ASHGA5P013370	0.0100299	0.0439495	2.93011	up	protein_coding	NM_001223	CCDS8329.1	CASP1	RefSeq	1330	chr11	-	104896236	104905884	TCCACACCAGATAATGTTTCTTGGAGACATCCCACAATGGGCTCTGTTTTTATTGGAAGA	834	caspase-1 isoform beta precursor	7.40904	5.85809
ASHGA5P018607	0.012544	0.0496064	2.92994	up	protein_coding	ENST00000455511	CCDS9145.2	ANAPC7	GENCODE	3045	chr12	-	110810704	110841535	GCAATGGACCAGTATAGTATAGCACTAAGTTTGGACCCCAATGACCAGAAGTCTCTAGAG	51434	anaphase promoting complex subunit 7 [Source:HGNC Symbol;Acc:17380]	5.34806	3.79719
ASHGA5P002580	0.0273922	0.0786992	2.92934	up	protein_coding	NM_002431	CCDS9750.1	MNAT1	RefSeq	1397	chr14	+	61201458	61435398	TAGATGAGCTGGAGAGTTCTGATCTCCCTGTTGCTCTGCTTTTGGCTCAGCATAAAGATA	4331	CDK-activating kinase assembly factor MAT1 isoform 1	6.32966	4.77908
ASHGA5P040463	0.0066179	0.0360131	2.92895	up	protein_coding	NM_173829	CCDS34171.1	SREK1IP1	RefSeq	6856	chr5	-	64013977	64064496	AAGCAAGCGCCTTTTCGAAAGCCAGAGGCTCGAGTTACCCCTCTTACCACCGTCATGGCA	285672	protein SREK1IP1	7.81377	6.26338
ASHGA5P010947	0.00365007	0.0329783	2.92321	up	protein_coding	NM_001012507	CCDS34529.1	CENPW	RefSeq	567	chr6	+	126661252	126669754	TGACTTATTGGTCCATCTGAACTGTTTACTGTTTGTTCATCGATTAGCAGAAGAGTCCAG	387103	centromere protein W	5.86252	4.31496
ASHGA5P052574	0.0314889	0.0864164	2.9213	up	protein_coding	NM_032122	CCDS4534.1	DTNBP1	RefSeq	1429	chr6	-	15523031	15663289	TTCAGTCCGATGAGGAGGAAGTTCAGGTGGACACTGCCCTGGCCACATCACACACTGACA	84062	dysbindin isoform a	6.15969	4.61308
ASHGA5P017328	0.0447794	0.109517	2.91858	up	protein_coding	NM_001098503	CCDS44596.1	PTPRJ	RefSeq	3193	chr11	+	48002109	48154266	AATAGAACTGGATGATTTGAACACCTGCCTGGAATTCCATCATCTGAAACAGAGTTGGCA	5795	receptor-type tyrosine-protein phosphatase eta isoform 2 precursor	8.443	6.89773
ASHGA5P007589	0.0023387	0.0309612	2.9157	up	protein_coding	NM_001098817	CCDS45853.1	INO80C	RefSeq	1095	chr18	-	33048290	33077955	TAAGAAGTATTCTGATGTTTCAGGTCTGCTTGCCAACTACACAGACCCCCAGAGCAAACT	125476	INO80 complex subunit C isoform 1	6.78829	5.24445
ASHGA5P009228	0.00806259	0.0393926	2.9154	up	protein_coding	NM_004355	CCDS47308.1	CD74	RefSeq	1506	chr5	-	149781199	149792499	ATGAGCAGGCACTCCTTGGAGCAAAAGCCCACTGACGCTCCACCGAAAGAGTCACTGGAA	972	HLA class II histocompatibility antigen gamma chain isoform b	5.77874	4.23505
ASHGA5P034651	0.00391016	0.0329783	2.91374	up	protein_coding	NM_001145641	CCDS46095.1	SRRM5	RefSeq	2415	chr19	+	44116252	44118650	GATAGGGGGAAAGGAAAGACCTGTGATGATTCAATAAATTTTTACATAGCACCCATCCCC	100170229	serine/arginine repetitive matrix protein 5	6.84291	5.30004
ASHGA5P008516	0.00599014	0.0347809	2.91333	up	protein_coding	ENST00000344035	CCDS348.1	PTP4A2	GENCODE	3929	chr1	-	32372021	32403988	TTGCAGGATTGGGAAGGGCACCTGTGCTGGTTGCACTTGCTTTGATTGAATGTGGAATGA	8073	"protein tyrosine phosphatase type IVA, member 2 [Source:HGNC Symbol;Acc:9635]"	6.88779	5.34512
ASHGA5P001610	0.00397625	0.0330479	2.90656	up	protein_coding	NM_203437	CCDS46303.1	AFTPH	RefSeq	4135	chr2	+	64751438	64820138	TACTAACCCTTTAGATGCTAGTGGAGGTTCCACTCTTCTGAACCTTGATTTCTTTGGGCC	54812	aftiphilin isoform a	6.13551	4.59619
ASHGA5P010091	0.0178835	0.0601151	2.90308	up	protein_coding	NM_001042440	CCDS54882.1	CAST	RefSeq	4550	chr5	+	95997906	96110385	TAAAAACAGAACCTGAGAAGAAGTCACAGTCAACCAAGCCAAAAAGCCTACCCAAGCAGG	831	calpastatin isoform f	6.55636	5.01877
ASHGA5P055029	0.0111945	0.04672	2.90294	up	protein_coding	NM_005472	CCDS8232.1	KCNE3	RefSeq	3070	chr11	-	74165885	74178600	TATGATCTAACACGAGAGGGCTGGGACGGTGGAAGACCAAGACACCTGGGGATTGCGTCT	10008	potassium voltage-gated channel subfamily E member 3	5.06424	3.52672
ASHGA5P051022	0.00238852	0.031171	2.90262	up	protein_coding	NM_018683	CCDS33482.1	RNF114	RefSeq	2478	chr20	+	48552913	48570422	TTTGCTCTGCATGCCTGCAGGAATGTCTGAAGCCGAAGAAGCCTGTCTGTGGGGTGTGTC	55905	RING finger protein 114	6.06182	4.52447
ASHGA5P006119	0.0386455	0.0992142	2.90236	up	protein_coding	ENST00000314133	CCDS8054.1	COX8A	GENCODE	507	chr11	+	63742078	63744015	AAGCTTGGGATCATGGAATTGGCCGTTGGGCTTACCTCCTGCTTCGTGACCTTCCTCCTG	1351	cytochrome c oxidase subunit VIIIA (ubiquitous) [Source:HGNC Symbol;Acc:2294]	7.80315	6.26592
ASHGA5P013203	0.00140036	0.0274621	2.89229	up	protein_coding	NM_016468	CCDS9802.1	COX16	RefSeq	1724	chr14	-	70791797	70826448	CCCCATGTTGTTGCTGATTGTTGGAGGTTCTTTTGGTCTTCGTGAGTTTTCTCAAATCCG	51241	"cytochrome c oxidase assembly protein COX16 homolog, mitochondrial isoform 1"	7.60595	6.07374
ASHGA5P006875	0.0298244	0.0831021	2.89122	up	protein_coding	NM_001142402	CCDS47465.1	CD164	RefSeq	3071	chr6	-	109687716	109703762	AATTCTACAGGTACAACAAATAACACTGTGACTCCAACCTCACAACCTGTGCGAAAGTCT	8763	sialomucin core protein 24 isoform 3 precursor	6.86977	5.33809
ASHGA5P007355	0.000327591	0.0192182	2.88954	up	protein_coding	NM_032549	CCDS5753.1	IMMP2L	RefSeq	1539	chr7	-	110303105	111202347	ATATTGTCAGAACCATAGGACACAAAAACCGGTATGTCAAAGTCCCCCGTGGTCACATCT	83943	mitochondrial inner membrane protease subunit 2	6.347	4.81616
ASHGA5P007154	0.00189129	0.0290776	2.88657	up	protein_coding	NM_152626	CCDS34646.1	ZNF92	RefSeq	3125	chr7	+	64838767	64865998	CAAAACCCCAGTTATGTGTTCTCATTTTGCCCAAGATGTTTGGCCAGAGCACAGCATAAA	168374	zinc finger protein 92 isoform 2	6.32634	4.79699
ASHGA5P030711	0.00468596	0.0338278	2.88545	up	protein_coding	NM_001243531		LOC100505679	RefSeq	498	chr15	+	84841241	84850985	CAGTTCGGTGAGGAAAGAAACCAAGCTATTTTCTCTTTTCCTCATGAACATTATATTTAG	100505679	uncharacterized protein LOC100505679	5.43794	3.90915
ASHGA5P003584	0.0205269	0.065551	2.88352	up	protein_coding	NM_001040033	CCDS829.1	CD53	RefSeq	1572	chr1	+	111413820	111442558	TCAAGGAAAACAAGTGTCTGCTTATGTCGTTCTTCATCCTGCTGCTGATTATCCTCCTTG	963	leukocyte surface antigen CD53	5.11162	3.58379
ASHGA5P012390	0.00718012	0.0373183	2.88336	up	protein_coding	NM_001134485	CCDS47967.1	TOMM5	RefSeq	875	chr9	-	37588411	37592636	GAGCTGAACGCTCCATTTATCTTAAAGAAATTGGACAGCATATGAAGACAGGACATCACA	401505	mitochondrial import receptor subunit TOM5 homolog isoform 2	7.42823	5.90048
ASHGA5P044205	0.00677989	0.0363557	2.87799	up	protein_coding	NM_001102560	CCDS47843.1	PPAPDC1B	RefSeq	776	chr8	-	38124497	38126738	TATGCTTGTTTTCACATCATTGAATTTAACCTAGAAAGCTAGTAGGGATGGGAAAATCTG	84513	phosphatidate phosphatase PPAPDC1B isoform 3	6.36254	4.83748
ASHGA5P012844	0.0489544	0.115896	2.87626	up	protein_coding	NM_201516	CCDS47581.1	H2AFV	RefSeq	1299	chr7	-	44873212	44887725	CACTGCAGAGGTGTGATCCCTCACATCCACAAATCTCTGATTGGAAAGAAGGGACAGCAG	94239	histone H2A.V isoform 4	6.49216	4.96797
ASHGA5P004756	0.022932	0.0703003	2.87566	up	protein_coding	NM_014886	CCDS4025.1	NSA2	RefSeq	1104	chr5	+	74063102	74072734	CGTCACCATGCCACAGAATGAATATATTGAATTACACCGTAAACGCTATGGATACCGTTT	10412	ribosome biogenesis protein NSA2 homolog	5.08735	3.56346
ASHGA5P022047	0.0110544	0.0463421	2.87378	up	protein_coding	NM_139201	CCDS9139.1	GIT2	RefSeq	2357	chr12	-	110385866	110434194	TTGAGTGACGAGCTGAGAATTATGCAGAAAAAGTTGCTTGGAAAAGATGCTAATTAATGA	9815	ARF GTPase-activating protein GIT2 isoform 4	5.69659	4.17364
ASHGA5P011608	0.00462619	0.0338278	2.8725	up	protein_coding	NM_001171080	CCDS55472.1	RBM41	RefSeq	5141	chrX	-	106305117	106362057	TGTGCTACAGGTTGAAGAAGCTGAGTGGAAGCAAAACTGTCTTGTACTAAAGAACTGACT	55285	RNA-binding protein 41 isoform 2	4.77323	3.25092
ASHGA5P002167	0.0146585	0.0536374	2.87248	up	protein_coding	NM_002306	CCDS41956.1	LGALS3	RefSeq	1017	chr14	+	55595934	55612148	ACCATTCAAAATACAAGTACTGGTTGAACCTGACCACTTCAAGGTTGCAGTGAATGATGC	3958	galectin-3 isoform 1	8.061	6.53871
ASHGA5P008930	0.0171022	0.0585811	2.87061	up	protein_coding	NM_006724	CCDS34566.1	MAP3K4	RefSeq	5351	chr6	+	161412821	161538417	AGGGATTCAGGGGTTCCAGCGTTCCTGAAAATGATCGATTGGCTTCCATAGCTGCTGAAT	4216	mitogen-activated protein kinase kinase kinase 4 isoform b	4.81325	3.29189
ASHGA5P011357	0.0067915	0.0363557	2.86772	up	protein_coding	NM_004768	CCDS647.1	SRSF11	RefSeq	2811	chr1	+	70671364	70717701	TCTAGAAGTGCAAGCAGAGAGAGACGACGACGAAGAAGCAGGAGTGGCACAAGATCTCCT	9295	serine/arginine-rich splicing factor 11 isoform 1	5.22863	3.70872
ASHGA5P054071	0.00297198	0.0320046	2.86509	up	protein_coding	NM_001168478	CCDS14500.1	ARMCX5	RefSeq	2808	chrX	+	101854425	101859085	TAAAACTCTGAATACCCCTCTGTTCTCATAAAGCCTCAAACAGTTTTTTGGAGTTGCAAT	64860	armadillo repeat-containing X-linked protein 5	13.7874	12.2688
ASHGA5P034475	0.00589788	0.0347605	2.86408	up	protein_coding	ENST00000254321	CCDS32915.1	ZNF700	GENCODE	2865	chr19	+	12035899	12061578	CTCACACGGGAGAGAAACCCTATGAGTGTATTCTAGTTCCGTTTGATATCATGAAAGGAC	90592	zinc finger protein 700 [Source:HGNC Symbol;Acc:25292]	6.88222	5.36415
ASHGA5P053242	0.00295172	0.0319884	2.85441	up	protein_coding	NM_001079877	CCDS47674.1	RASA4	RefSeq	5468	chr7	-	102220092	102257205	TATAGGCATTTGGGATTTGCTGCAAAATGACCCAGAGGCAGGGGTCAGGGGGAGAGGTAG	10156	ras GTPase-activating protein 4 isoform 2	9.60759	8.0944
ASHGA5P011852	0.00850426	0.0402053	2.85348	up	protein_coding	ENST00000540010	CCDS6825.1	TRAF1	GENCODE	4303	chr9	-	123664670	123691451	TCTCTCTGAGAACCCGAGGAATGGCGAGGATCAGATCTGCCCCAAATGCAGAGGGGAAGA	7185	TNF receptor-associated factor 1 [Source:HGNC Symbol;Acc:12031]	6.29148	4.77876
ASHGA5P007605	0.0217338	0.0679594	2.85282	up	protein_coding	NM_002719	CCDS9964.1	PPP2R5C	RefSeq	4445	chr14	+	102276139	102394328	AATAGAAAATCTAGCCAAAGCCAATCCCCAGTACACAGTGTATAGTCAAGCCAGCACCAT	5527	serine/threonine-protein phosphatase 2A 56 kDa regulatory subunit gamma isoform isoform a	8.00523	6.49284
ASHGA5P019797	0.0287996	0.0813142	2.85201	up	protein_coding	NM_021928	CCDS54823.1	SPCS3	RefSeq	4596	chr4	+	177241089	177253396	GGATCATGCTAAAAAATGTAGAAGATTTCACTGGACCTAGAGAAAGAAGTGATCTGGGAT	60559	signal peptidase complex subunit 3	5.29917	3.78719
ASHGA5P006292	0.00477893	0.0338278	2.84453	up	protein_coding	NM_145231	CCDS9887.1	EFCAB11	RefSeq	695	chr14	-	90263468	90421089	AGGTATTCAGGGAAGTAGATCGAGATTCAGATGGTCACGTCAGCTTTAGAGACTTTGAAT	90141	EF-hand calcium-binding domain-containing protein 11	4.83967	3.33148
ASHGA5P004727	0.0114274	0.0472063	2.84257	up	protein_coding	ENST00000296522	CCDS3821.1	HPGD	GENCODE	3027	chr4	-	175411327	175444049	GAATTTTGGACCCACCATTGATTGCCAATGGATTGATAACACTCATTGAAGATGATGCTT	3248	hydroxyprostaglandin dehydrogenase 15-(NAD) [Source:HGNC Symbol;Acc:5154]	6.72459	5.21739
ASHGA5P052041	0.0117004	0.0477255	2.83839	up	protein_coding	ENST00000296402	CCDS3704.1	CAMK2D	GENCODE	5820	chr4	-	114372187	114683083	CAACAGTACCCATCAAGTAAATATTTCCAGGCTGTCAGCTTCTTTGTTAATACACCCATG	817	calcium/calmodulin-dependent protein kinase II delta [Source:HGNC Symbol;Acc:1462]	4.87941	3.37434
ASHGA5P013473	0.0134795	0.0516038	2.83713	up	protein_coding	NM_001005474	CCDS43123.1	NFKBIZ	RefSeq	3801	chr3	+	101546833	101579869	TTTGGCTTTCTTGGCCTGATGCTGAACTCTCGAGGTTGAGCCCCATATGGGGGTTGGCAG	64332	NF-kappa-B inhibitor zeta isoform b	6.29809	4.79366
ASHGA5P012568	0.0165669	0.0574625	2.8367	up	protein_coding	NM_182649	CCDS13087.1	PCNA	RefSeq	1319	chr20	-	5095598	5100647	GTACCCCTTGTTGTAGAGTATAAAATTGCGGATATGGGACACTTAAAATACTACTTGGCT	5111	proliferating cell nuclear antigen	8.22083	6.71661
ASHGA5P001862	0.00684448	0.036486	2.8365	up	protein_coding	NM_144581	CCDS9739.1	C14orf149	RefSeq	1381	chr14	-	59939405	59951073	AGCTGTGAGGGAAGCGAAATGTGGTGATTTTAAAGCTGTTATAGTGGAAGTATCAGGACA	112849	probable proline racemase	5.85658	4.35247
ASHGA5P006122	0.00224202	0.0309205	2.83155	up	protein_coding	NM_004315	CCDS6005.1	ASAH1	RefSeq	2551	chr8	-	17913924	17942507	TGTGAAAGCCCAATGGACAGAGGACTGCAGAAAATCAACCTATCCTCCTTCAGGACCAAC	427	acid ceramidase isoform b	7.36846	5.86687
ASHGA5P008590	0.00503129	0.0338278	2.82812	up	protein_coding	NM_024596	CCDS43689.1	MCPH1	RefSeq	3154	chr8	+	6264112	6501140	ACAGTCAAGTATCTGTCTGAGAAATGGGTCTTAGATTCCATCACCCAGCACAAGGTCTGT	79648	microcephalin isoform 1	5.67255	4.17271
ASHGA5P001673	0.0316445	0.0866323	2.82764	up	protein_coding	NM_003467	CCDS46420.1	CXCR4	RefSeq	1691	chr2	-	136871918	136875725	ACCAGCGGTTACCATGGAGGGGATCAGTATATACACTTCAGATAACTACACCGAGGAAAT	7852	C-X-C chemokine receptor type 4 isoform b	4.38027	2.88067
ASHGA5P048788	0.029214	0.0820069	2.82675	up	protein_coding	NM_002675	CCDS45297.1	PML	RefSeq	2254	chr15	+	74287013	74335717	AAGACAGACCTCTGGTTTTCTTTGACCTCAAGATTGACAATGAAAGTGGGTTCTCCTGGG	5371	protein PML isoform 6	4.5137	3.01456
ASHGA5P012912	0.0374606	0.0970032	2.81537	up	protein_coding	NM_001166118	CCDS55101.1	NT5C3	RefSeq	1932	chr7	-	33053724	33080777	TTTGCCTGAGATGCCAGAATTCCAGAAAAGTTCAGTTCGAATCAAGAACCCTACAAGAGT	51251	cytosolic 5'-nucleotidase 3 isoform 3	4.6091	3.11577
ASHGA5P007554	0.0068945	0.0366228	2.8153	up	protein_coding	NM_138787	CCDS7904.1	C11orf74	RefSeq	837	chr11	+	36616092	36680817	ATGGATGAAGAGATTAAACCCCAAATGAGTGAGGATTTGCTGCTGCTTCCAGGAGAAGTG	119710	uncharacterized protein C11orf74	5.56594	4.07264
ASHGA5P007079	0.00620807	0.0353062	2.81501	up	protein_coding	NM_018838	CCDS9050.1	NDUFA12	RefSeq	592	chr12	-	95365103	95397489	CAATTTTTTGGCCGTCACCGATGGGTTGTATATACTACTGAAATGAATGGCAAAAACACA	55967	NADH dehydrogenase [ubiquinone] 1 alpha subcomplex subunit 12 isoform a	7.47115	5.97801
ASHGA5P011853	0.00352626	0.0328487	2.80992	up	protein_coding	NM_003201	CCDS7253.1	TFAM	RefSeq	5319	chr10	+	60144902	60158990	CAGAACCCAGATGCAAAAACTACAGAACTAATTAGAAGAATTGCCCAGCGTTGGAGGGAA	7019	"transcription factor A, mitochondrial isoform 1 precursor"	4.98415	3.49362
ASHGA5P053974	0.00662449	0.0360205	2.80972	up	protein_coding	NM_006579	CCDS14300.1	EBP	RefSeq	1191	chrX	+	48380163	48387104	TCATGCCCAGAGCACGCTGGATGCCAAGGCCACAAAAGCCAAGAGCAAGAAGAACTGAGG	10682	"3-beta-hydroxysteroid-Delta(8), Delta(7)-isomerase"	5.48263	3.99221
ASHGA5P054203	0.0182058	0.0607477	2.8051	up	protein_coding	NM_001289	CCDS14767.1	CLIC2	RefSeq	2702	chrX	-	154505499	154563986	TATGCCCGTGAAGAATTTACCCACACGTGTCCTGAAGACAAAGAAATTGAAAATACTTAC	1193	chloride intracellular channel protein 2	4.62755	3.1395
ASHGA5P039303	0.00588236	0.0347584	2.8047	up	protein_coding	NM_024511	CCDS33941.1	HAUS3	RefSeq	5620	chr4	-	2230095	2243860	GTGGACATGCTTTGTGATACTTTGTATCAAGGAGGAAATCAGCTTTTGCTTAGTGATCAG	79441	HAUS augmin-like complex subunit 3	6.37716	4.88931
ASHGA5P029107	0.00545224	0.0343796	2.80228	up	protein_coding	NM_002013	CCDS9683.1	FKBP3	RefSeq	1353	chr14	-	45584801	45603732	TATGAGTAAAGGAGAAAAGGCTCGACTGGAGATTGAACCAGAATGGGCTTACGGAAAGAA	2287	peptidyl-prolyl cis-trans isomerase FKBP3	6.2339	4.7473
ASHGA5P018393	0.00332243	0.032685	2.80069	up	protein_coding	NM_001130107	CCDS45168.1	KLC1	RefSeq	2530	chr14	+	104095524	104167888	AGAACCCCGGGGCGTCTCTGGCCGAGCCTCTTTTTGTGGAAAACGACAGCAGCAGCAGTG	3831	kinesin light chain 1 isoform 3	5.05235	3.56656
ASHGA5P015817	0.00173926	0.0289426	2.79914	up	protein_coding	NM_017619	CCDS781.1	RNPC3	RefSeq	1901	chr1	+	104068577	104097859	GTGTTAAAAATTAATAAAGGTTTTTTTGAATCCCGTGTCCTTCAAGTGCTTTCTAACTTT	55599	RNA-binding protein 40	7.13907	5.65409
ASHGA5P005795	0.00808989	0.0394393	2.79534	up	protein_coding	NM_197954	CCDS8617.1	CLEC7A	RefSeq	519	chr12	-	10279921	10282868	GGTACCATGGCTGGTTTCAAAGCTGTGGAATTCAAAGGATAAATTAATGAAGAAAACAAG	64581	C-type lectin domain family 7 member A isoform f	8.2052	6.72218
ASHGA5P013360	0.0473083	0.113076	2.79329	up	protein_coding	NM_145206	CCDS7575.2	VTI1A	RefSeq	4401	chr10	+	114206755	114578504	TGTTGCGAAGAATCATCCAGAACCGCATCCTGCTCGTCATCCTAGGGATCATCGTGGTCA	143187	vesicle transport through interaction with t-SNAREs homolog 1A	6.73297	5.251
ASHGA5P049606	0.0130397	0.0506425	2.7931	up	protein_coding	NM_024683	CCDS42291.1	TEFM	RefSeq	1357	chr17	-	29226000	29233286	TATCGTTTTTGGTACTCGAAGAATTGCCTGGGCTCACCTTGATCGTAAGTTGACAGTGCT	79736	"transcription elongation factor, mitochondrial"	6.67221	5.19034
ASHGA5P025180	0.00633928	0.0354584	2.79207	up	protein_coding	NM_001048241	CCDS12219.1	UBL5	RefSeq	469	chr19	+	9938555	9940797	GCGATTCGAGCTCCAGCTAGGATGATCGAGGTTGTTTGCAACGACCGTCTGGGGAAGAAG	59286	ubiquitin-like protein 5	8.78206	7.30072
ASHGA5P051684	0.000767819	0.023569	2.79106	up	protein_coding	NM_014154	CCDS3098.1	ARMC8	RefSeq	3211	chr3	+	137906114	137965729	TCTCTTGGAGCAAATGATGAAGACATCCGGAAGAAGGTGAGTCTGGGAGAGGGGCGTCCC	25852	armadillo repeat-containing protein 8 isoform 1	5.95595	4.47513
ASHGA5P002637	0.00745766	0.0379211	2.788	up	protein_coding	ENST00000261597	CCDS11827.1	NDC80	GENCODE	2172	chr18	+	2571509	2616634	TTCAGCGGGAATACCAACTAGTTGTGCAAACCACGACTGAAGAAAGACGAAAAGTGGGAA	10403	NDC80 kinetochore complex component homolog (S. cerevisiae) [Source:HGNC Symbol;Acc:16909]	5.99981	4.52058
ASHGA5P005927	0.00386557	0.0329783	2.78529	up	protein_coding	NM_001003803	CCDS32075.1	ATP5S	RefSeq	1859	chr14	+	50779046	50792946	CATCATTGCTTTGCGTCATTTAAGAAACCTCAAATATTTGTTGTTAAGTGATCTTCCTGG	27109	"ATP synthase subunit s, mitochondrial isoform a precursor"	6.30116	4.82333
ASHGA5P012626	0.0363366	0.095136	2.7846	up	protein_coding	NM_030969	CCDS4515.1	TMEM14B	RefSeq	989	chr6	+	10747994	10757214	CCTTCGGCAGATGCAGGCCTGGGGTAGTCTCCTTTCTGGACTGAGAAGAGAAGAATGGAG	81853	transmembrane protein 14B isoform a	4.33794	2.86047
ASHGA5P000762	0.00712889	0.0371848	2.78398	up	protein_coding	ENST00000175091	CCDS1696.1	LAPTM4A	GENCODE	1765	chr2	-	20232410	20251789	AATATCTGGATCAACTACCTGATTTTCCCTACAAAGATGACCTCCTGGCCTTGGACTCCA	9741	lysosomal protein transmembrane 4 alpha [Source:HGNC Symbol;Acc:6924]	5.57335	4.0962
ASHGA5P055166	0.00450638	0.0336065	2.78381	up	protein_coding	NM_004788	CCDS8396.1	UBE4A	RefSeq	6144	chr11	+	118230295	118269926	AACTGGTAGATTTGATGTTAGAAGCCATCCAGGGAGCCCGTGAGTACATGAACAAGATCT	9354	ubiquitin conjugation factor E4 A isoform 1	5.15436	3.6773
ASHGA5P041704	0.00898697	0.0414818	2.78363	up	protein_coding	ENST00000343677	CCDS4577.1	HIST1H1C	GENCODE	732	chr6	-	26055967	26056699	CAAGAAGAAATAGGCGAACGCCTACTTCTAAAACCCAAAAGGCTCTTTTCAGAGCCACCA	3006	"histone cluster 1, H1c [Source:HGNC Symbol;Acc:4716]"	6.33092	4.85395
ASHGA5P001867	0.000277726	0.0187505	2.78229	up	protein_coding	NM_013258	CCDS10708.1	PYCARD	RefSeq	782	chr16	-	31212806	31214097	ACGCACCAGGGCTCTGGAGCCGCGCCAGCTGGGATCCAGGCCCCTCCTCAGTCGGCAGCC	29108	apoptosis-associated speck-like protein containing a CARD isoform a	6.3103	4.83402
ASHGA5P007197	0.0372724	0.0966635	2.78215	up	protein_coding	NM_213674	CCDS6586.1	TPM2	RefSeq	1182	chr9	-	35681989	35690053	GACCTAGAAGAGACCTTGGCCAGTGCCAAGGAGGAGAACGTCGAGATTCACCAGACCTTG	7169	tropomyosin beta chain isoform 2	6.33989	4.86369
ASHGA5P052395	0.00634142	0.0354584	2.78109	up	protein_coding	NM_017665	CCDS4165.1	ZCCHC10	RefSeq	2136	chr5	-	132332677	132362240	GCAGCTCTGACGATGAACCACCAAAGAAGAAGAAAAAGAAATAGAGTTGCTCCATTCATA	54819	zinc finger CCHC domain-containing protein 10	5.65703	4.18138
ASHGA5P011640	0.00384984	0.0329783	2.77906	up	protein_coding	NM_001080425	CCDS35355.1	BEX4	RefSeq	1282	chrX	+	102470019	102472128	ATAGGCCCAGGAGTAATGGAGTCCAAAGAGGAACTAGCGGCAAACAATCTCAACGGGGAA	56271	protein BEX4	6.40884	4.93424
ASHGA5P021905	0.0290797	0.081765	2.77844	up	protein_coding	ENST00000544106	CCDS54671.1	MYNN	GENCODE	4815	chr3	+	169492052	169507504	TCCCATACAGGTGCAGATAAAACTCTAGACTCCAGTGCAGAGGATCATACTTTGAGTGAA	55892	myoneurin [Source:HGNC Symbol;Acc:14955]	5.08503	3.61076
ASHGA5P012156	0.00604155	0.0348208	2.77634	up	protein_coding	NM_205838	CCDS4705.2	LST1	RefSeq	676	chr6	+	31553955	31556686	TCCCTGATCCCTGACCTAATGTTATCGCGGAATGATGTAAAGAGGCTGGAGAGGAGCTGG	7940	leukocyte-specific transcript 1 protein isoform 3	7.58349	6.11031
ASHGA5P016816	0.0102076	0.0443242	2.7708	up	protein_coding	NM_001195035	CCDS53441.1	MR1	RefSeq	7479	chr1	+	181002560	181031074	CAAAGAACAGAGCAAAATGGAGCCATCTACCTTCCAACACCAGATCGATGATTGCAGATC	3140	major histocompatibility complex class I-related gene protein isoform 4 precursor	5.67683	4.20652
ASHGA5P049469	0.00388659	0.0329783	2.77064	up	protein_coding	NM_015343	CCDS11093.1	CTDNEP1	RefSeq	1780	chr17	-	7146905	7155259	TGATGTTCGTTCCGTGCTGAGCCGAAACCTTCACCAACATCGGCTCTGGTGACAGCTGCT	23399	CTD nuclear envelope phosphatase 1	5.13915	3.66893
ASHGA5P055616	0.0109772	0.0461893	2.7701	up	protein_coding	NM_005719	CCDS9146.1	ARPC3	RefSeq	912	chr12	-	110872705	110888158	CGGAAGCGCTCCGCTGTACCTGGATCCTGCTCCTCTGGGTTGAAACCCGGGCGCCGCCAA	10094	actin-related protein 2/3 complex subunit 3	5.48377	4.01384
ASHGA5P039448	0.0232242	0.07076	2.76944	up	protein_coding	NM_002704	CCDS3563.1	PPBP	RefSeq	1307	chr4	-	74852155	74853907	AAACATCCAAAGTTTGGAAGTGATCGGGAAAGGAACCCATTGCAACCAAGTCGAAGTGAT	5473	platelet basic protein preproprotein	7.92214	6.45254
ASHGA5P056029	0.00583208	0.0347584	2.76697	up	protein_coding	NM_001123329	CCDS45126.1	ZBTB1	RefSeq	3852	chr14	+	64971291	64991669	CCAAGCATTTGAAAAGAACCTGAGTGATTTTCTACTGTACTAATGTTTAGATGATAGCAG	22890	zinc finger and BTB domain-containing protein 1 isoform 1	6.68536	5.21706
ASHGA5P003995	0.00529408	0.0340831	2.76252	up	protein_coding	NM_006464	CCDS46351.1	TGOLN2	RefSeq	6373	chr2	-	85545140	85555419	GGACCAGAAGTCCTAACAGAATGGTATATTCCTCTGGAAAAAGATGAACGTCACCAATGG	10618	trans-Golgi network integral membrane protein 2 isoform 1 precursor	5.49058	4.0246
ASHGA5P051335	0.000998089	0.0251671	2.75693	up	protein_coding	NM_006358	CCDS14005.1	SLC25A17	RefSeq	2279	chr22	-	41165638	41215392	TCTCATGTTCCTTGTTTATGAGAAACTGACAGCTGCCACCTTCACAGTTATGGGGCTGAA	10478	peroxisomal membrane protein PMP34	6.96921	5.50614
ASHGA5P008241	0.00598881	0.0347809	2.75664	up	protein_coding	NM_003684	CCDS538.1	MKNK1	RefSeq	2827	chr1	-	47023078	47069966	AGGGAAACAAGAACATTTTGGAGCTGATTGAGTTCTTTGAAGATGACACAAGGTTTTACT	8569	MAP kinase-interacting serine/threonine-protein kinase 1 isoform 1	5.63208	4.16917
ASHGA5P006599	0.0042905	0.0334484	2.7544	up	protein_coding	NM_018048	CCDS8628.1	MAGOHB	RefSeq	3034	chr12	-	10756363	10766208	TGGCCGACAGGAGCTTGAAATTGTAATTGGAGATGAGCACATATCTTTTACCACATCAAA	55110	protein mago nashi homolog 2	5.61536	4.15363
ASHGA5P002427	0.0111952	0.04672	2.75389	up	protein_coding	NM_004136	CCDS10302.1	IREB2	RefSeq	6367	chr15	+	78730517	78793798	TCCAGACAGAACCTTTAGGTACTGACCCCACCGGCAAGAACATTTACCTGCATGATATTT	3658	iron-responsive element-binding protein 2	6.8932	5.43173
ASHGA5P050329	0.0178352	0.0600648	2.75385	up	protein_coding	NM_001081639	CCDS42616.1	LILRB1	RefSeq	2859	chr19	+	55141907	55149004	AACTTTCCTTCTGACCAAGGAGGGGGCAGCTGATGACCCATGGCGTCTAAGATCAACGTA	10859	leukocyte immunoglobulin-like receptor subfamily B member 1 isoform 4 precursor	5.06683	3.60538
ASHGA5P009338	0.00105282	0.0253141	2.7521	up	protein_coding	NM_023935	CCDS13050.1	DDRGK1	RefSeq	1298	chr20	-	3171011	3185295	TACGCACTCAGGACACCATAAATCGCATCCAGGACCTGCTGGCTGAGGGGACTATAACAG	65992	DDRGK domain-containing protein 1 precursor	6.10901	4.64847
ASHGA5P003135	0.00904835	0.0416146	2.74883	up	protein_coding	NM_018317	CCDS3439.1	TBC1D19	RefSeq	2204	chr4	+	26585545	26756918	TGCAGCTGAAGCAGTTCTTGCTGACCTTTCTACTTTAAAAGTTATGCCTCTTCTTCAGAT	55296	TBC1 domain family member 19	4.78626	3.32744
ASHGA5P042281	0.00214812	0.0306219	2.74653	up	protein_coding	NM_001160094	CCDS54972.1	ACOT13	RefSeq	4407	chr6	+	24667262	24705295	TTGACAGCCACGTTAGTAGATAACATATCAACAATGGCTCTGCTATGCACGGAAAGGGGA	55856	acyl-coenzyme A thioesterase 13 isoform 2	6.71233	5.25472
ASHGA5P005692	0.000692226	0.023569	2.74612	up	protein_coding	NM_001142588	CCDS44120.1	NFYC	RefSeq	2162	chr1	+	41157241	41237275	AGTTGTGCAGGGACAGATCCAGACACTTGCCACCAATGCTCAACAGGGGCAAAGAAATGC	4802	nuclear transcription factor Y subunit gamma isoform 1	5.17731	3.71992
ASHGA5P031171	0.00274867	0.0318783	2.74604	up	protein_coding	NM_001012398	CCDS10749.1	AKTIP	RefSeq	2222	chr16	-	53525191	53537170	TAAGGTGTGCACTGCTCGTTTGTTTGACCAACCTAAAATAGAAGACCCCTATGCAATTAG	64400	AKT-interacting protein	5.36679	3.90944
ASHGA5P029916	0.0155675	0.0555408	2.74509	up	protein_coding	NM_181077	CCDS10038.1	GOLGA8A	RefSeq	4264	chr15	-	34671269	34682001	GGCTAATTAACAGTCGTATGATTTCTAGCCCATGGGTTTAAAACTGTATCTTAAAGAGTC	23015	Golgin subfamily A member 8A	7.30644	5.84959
ASHGA5P003408	0.00502243	0.0338278	2.74397	up	protein_coding	ENST00000396060	CCDS10173.1	GTF2A2	GENCODE	1582	chr15	-	59930260	59949737	GTGAAAATTGTAGCCTGTGATGGTAAAAATACTGGCTCCAATACTACAGAATGAATAGAA	2958	"general transcription factor IIA, 2, 12kDa [Source:HGNC Symbol;Acc:4647]"	6.76128	5.30501
ASHGA5P052008	0.0340486	0.0908469	2.74397	up	protein_coding	NM_021159	CCDS47106.1	RAP1GDS1	RefSeq	3767	chr4	+	99182526	99365012	TAAGGTCACTGTGCAGTATAACAGATCCCGCCAATGAGAAGCTCTTGACTGTCTTTTGTG	5910	rap1 GTPase-GDP dissociation stimulator 1 isoform 2	4.78904	3.33278
ASHGA5P054064	0.00348788	0.0328172	2.74392	up	protein_coding	NM_177947	CCDS14489.1	ARMCX3	RefSeq	3367	chrX	+	100878119	100882831	CCAAAGAGCCAGGAATAACACCTTGATTTTGTAATTTAGAAGCAACACACATTGTAAACT	51566	armadillo repeat-containing X-linked protein 3	5.23987	3.78363
ASHGA5P050324	0.00161574	0.0281485	2.74318	up	protein_coding	ENST00000301219	CCDS12888.1	LILRA5	GENCODE	1365	chr19	-	54818352	54824409	TGATATTTCAGGATTGGCACAGCCAGAGAAGCCCCCAAGCTGCAGCTGGAAGGTGAACAG	353514	"leukocyte immunoglobulin-like receptor, subfamily A (with TM domain), member 5 [Source:HGNC Symbol;Acc:16309]"	7.10385	5.648
ASHGA5P027779	0.00357348	0.0328981	2.74065	up	protein_coding	NM_004038	CCDS30782.1	AMY1A	RefSeq	1862	chr1	-	104230039	104238912	TTTCCTTTCTTAGCTTACGTTATCTACCAGAGCACCGTGGGCTGTTACTTGCCTTGAGTT	276	alpha-amylase 1 precursor	8.1857	6.73118
ASHGA5P006211	0.0190501	0.0623998	2.73928	up	protein_coding	NM_004489	CCDS11100.1	GPS2	RefSeq	1181	chr17	-	7215977	7218658	AAATGTTTGGACCCCAAGTGCTTACGACCCGGCACTACGTGGGCTCAGCAGCTGCTTTTG	2874	G protein pathway suppressor 2	5.25011	3.79631
ASHGA5P001453	0.00368836	0.0329783	2.73831	up	protein_coding	NM_014367	CCDS43139.1	FAM162A	RefSeq	838	chr3	+	122103022	122128961	GGGCAAGAAGGCTGCCCAAAGACACGAGACTTTAACAAGCTTGAACTTAGAAAAGAAAGC	26355	protein FAM162A	6.5492	5.09592
ASHGA5P011432	0.00402789	0.0330909	2.73404	up	protein_coding	NM_152285	CCDS7049.1	ARRDC1	RefSeq	1621	chr9	+	140500095	140509812	TTCCTCCAGAGTACAGTTCTTGGGGCTACCCCTATGAGGCCCCACCGTCTTATGAGCAGA	92714	arrestin domain-containing protein 1	6.2795	4.82846
ASHGA5P001330	0.00310936	0.0323215	2.73397	up	protein_coding	NM_005127	CCDS8605.1	CLEC2B	RefSeq	2052	chr12	-	10004967	10022458	AGAAGAAATGAATTTTCTTAGGCGGTATAAATGCAGTTCTGATCACTGGATTGGACTGAA	9976	C-type lectin domain family 2 member B	7.77703	6.32603
ASHGA5P002997	0.00821672	0.039695	2.73379	up	protein_coding	NM_004226	CCDS2315.1	STK17B	RefSeq	5324	chr2	-	196998306	197036336	GGCCGGAGCGGTAAAAATAAGTGACTAAAGAAGCAGACCTGGGAATCACCTAACATGTCG	9262	serine/threonine-protein kinase 17B	4.69714	3.24624
ASHGA5P007777	0.0110058	0.0461987	2.7335	up	protein_coding	NM_018321	CCDS34143.1	BRIX1	RefSeq	1303	chr5	+	34915819	34925787	ACCAAACATGCATCGGCGTGTCATAAGATCCATCACAGCTGCAAAATACAGAGAGAAACA	55299	ribosome biogenesis protein BRX1 homolog	5.75547	4.30472
ASHGA5P001998	0.00590622	0.0347605	2.73283	up	protein_coding	NM_020234	CCDS10132.1	DTWD1	RefSeq	2750	chr15	+	49913225	49937333	CGACTTCAAGGGTTGTTACAAGTTGAGTTGAAAACAAGAAAAACTTGCTTTTGGCGCCAT	56986	DTW domain-containing protein 1	6.33502	4.88463
ASHGA5P050935	0.0253851	0.0747826	2.731	up	protein_coding	NM_000099	CCDS13158.1	CST3	RefSeq	818	chr20	-	23614293	23618574	TCAGGACGCCTAGGGGTCTGTACCGGGCTGGCCTGTGCCTATCACCTCTTATGCACACCT	1471	cystatin-C precursor	7.23269	5.78326
ASHGA5P003077	0.00639065	0.0354584	2.73042	up	protein_coding	ENST00000264538	CCDS2951.1	IFT57	GENCODE	3203	chr3	-	107879658	107941417	ACTGATGGTGCTCCTTTGGTGAAGATTAAACAGAGCTTAACAAAACTGAAGCAAGAAACT	55081	intraflagellar transport 57 homolog (Chlamydomonas) [Source:HGNC Symbol;Acc:17367]	6.60002	5.1509
ASHGA5P048750	0.0136203	0.05182	2.72863	up	protein_coding	NM_004663	CCDS10212.1	RAB11A	RefSeq	4943	chr15	+	66161796	66184329	TTGAAACTTCGGCCCTAGACTCTACAAATGTAGAAGCTGCTTTTCAGACAATTTTAACAG	8766	ras-related protein Rab-11A isoform 1	6.92115	5.47297
ASHGA5P012132	0.0107466	0.0457864	2.72711	up	protein_coding	NM_001320	CCDS4712.1	CSNK2B	RefSeq	1128	chr6	+	31633656	31637843	TTTGTGCCCAGGCTCTACGGTTTCAAGATCCATCCGATGGCCTACCAGCTGCAGCTCCAA	1460	casein kinase II subunit beta	7.35563	5.90826
ASHGA5P049762	0.00386441	0.0329783	2.72698	up	protein_coding	NM_004375	CCDS11583.1	COX11	RefSeq	2427	chr17	-	53038566	53046064	CAGGAGAGACTGCACTGGCGTTTTACAGAGCTAAGAATCCTACTGACAAACCAGTAATTG	1353	"cytochrome c oxidase assembly protein COX11, mitochondrial isoform 1"	4.87235	3.42504
ASHGA5P006067	0.00469203	0.0338278	2.72695	up	protein_coding	NM_001122631	CCDS44519.1	CDKN1C	RefSeq	1771	chr11	-	2904447	2906995	GGTGAGCCAAAGCCCAAAGAGCCCCGAGGGAACCTGCCGGGGCAGCGGACGTTGGAAGGG	1028	cyclin-dependent kinase inhibitor 1C isoform b	4.41181	2.96452
ASHGA5P026598	0.0113749	0.0470912	2.72595	up	protein_coding	ENST00000528743	CCDS53677.1	KRTAP5-9	GENCODE	1188	chr11	+	71259465	71260653	ACATGTATCTATGGAAATCCAAAATGCATCTGGGTGCAGCACTAAATAAATTCTCCATCC	3846	keratin associated protein 5-9 [Source:HGNC Symbol;Acc:23604]	4.75281	3.30605
ASHGA5P053813	0.00374653	0.0329783	2.72525	up	protein_coding	NM_001031725	CCDS30964.1	DDX59	RefSeq	2337	chr1	-	200613164	200639126	CATACCTTCATGACCAGAAGAGAAAGGAACAACAGAAAGATAAACAGACACAGAATGATC	83479	probable ATP-dependent RNA helicase DDX59	6.34962	4.90323
ASHGA5P005911	0.0224101	0.0693262	2.72487	up	protein_coding	NM_012408	CCDS13404.1	ZMYND8	RefSeq	4568	chr20	-	45838380	45985474	CAAGGCTCTGACCATTCCCGGAGTAATAAATCCAGTTGGAGCAGCAGTGATGAGAAGAGG	23613	protein kinase C-binding protein 1 isoform b	5.0952	3.64901
ASHGA5P044712	0.00190838	0.029175	2.72309	up	protein_coding	NM_014265	CCDS34865.1	ADAM28	RefSeq	3220	chr8	+	24151579	24212726	AAAGACACAAACGCACTTCCCCCTACTGTTTTCAAGGATAATCCAGTGTCTACACCTAAG	10863	disintegrin and metalloproteinase domain-containing protein 28 isoform 1 preproprotein	8.50268	7.05744
ASHGA5P018469	0.00281695	0.0318783	2.72214	up	protein_coding	NM_001136139	CCDS45899.1	TCF3	RefSeq	4078	chr19	-	1609288	1650286	CACATGTGAAAGTAAACAAAACCTGAAAGCAAGCAACAAAACATACACTTTGTCAGAGAA	6929	transcription factor E2-alpha isoform E47	5.97854	4.5338
ASHGA5P052903	0.00976501	0.0434309	2.71897	up	protein_coding	NM_152858	CCDS5267.1	WTAP	RefSeq	1856	chr6	+	160148029	160170453	AAGTTTACGCCTGATAGGTAAACAAATCATACTCCCCAGTCAAGACTTCCCTGACAGTCC	9589	pre-mRNA-splicing regulator WTAP isoform 2	6.40819	4.96513
ASHGA5P002003	0.000278635	0.0187505	2.71516	up	protein_coding	NM_006866	CCDS12900.1	LILRA2	RefSeq	1723	chr19	+	55085256	55099027	TCGTGGTCTCAGCATCCCTAGGCCAACACCCCCAGGATTACACAGTGGAGAATCTCATCC	11027	leukocyte immunoglobulin-like receptor subfamily A member 2 isoform b precursor	8.93461	7.49357
ASHGA5P002935	0.00942774	0.0425098	2.71385	up	protein_coding	ENST00000263579	CCDS8473.1	DCPS	GENCODE	1479	chr11	+	126173646	126215644	ACCTATCACTTGTTCCCTCCAAGACAACTGAATGATGTAAAGACGACCGTGGTTTACCCT	28960	"decapping enzyme, scavenger [Source:HGNC Symbol;Acc:29812]"	4.58936	3.14902
ASHGA5P012824	0.000187807	0.0169924	2.71318	up	protein_coding	NM_016309	CCDS45445.1	LCMT1	RefSeq	1374	chr16	+	25123046	25189551	ACTTTCCAATGATTGTCACGAGAAAGCTGCACAGTATCAAATGCAAGCCTCCCCTATCCA	51451	leucine carboxyl methyltransferase 1 isoform a	6.12426	4.68428
ASHGA5P003658	0.00417193	0.0330909	2.70984	up	protein_coding	NM_015488	CCDS2411.1	PNKD	RefSeq	3129	chr2	+	219135114	219211516	AAGAACCCCATGAAAGCTGTGGGACTGGCCTGGTACAGCCTGTACACCCGCACCTGGCTC	25953	probable hydrolase PNKD isoform 1 precursor	7.34683	5.90862
ASHGA5P055365	0.00850159	0.0402053	2.70954	up	protein_coding	NM_181847	CCDS8751.1	AMIGO2	RefSeq	3849	chr12	-	47469489	47473734	GACACACCTTTTGTGGCGTCCACTTAATTTGTGCCTATATTTGTATGATGTCATAATTTA	347902	amphoterin-induced protein 2 precursor	5.94334	4.5053
ASHGA5P055673	0.00326562	0.0326774	2.70664	up	protein_coding	NM_022916	CCDS9231.1	VPS33A	RefSeq	2628	chr12	-	122716093	122751068	GAAGATGGAGGTACAGAATATGTCATTGCCACCACTAAACTAATGAATGGAACCAGTTGG	65082	vacuolar protein sorting-associated protein 33A	6.65054	5.21404
ASHGA5P041382	0.00387235	0.0329783	2.70601	up	protein_coding	NM_001745	CCDS4178.1	CAMLG	RefSeq	2255	chr5	+	134074169	134087850	AGATTGGTGGGATGTGCTCTTCTTGCTCTTGGAGTCAGAGCTTTTGTTTGCAAATACTTG	819	calcium signal-modulating cyclophilin ligand	5.37736	3.9412
ASHGA5P052866	0.00432689	0.0334484	2.70465	up	protein_coding	NM_004833	CCDS1181.1	AIM2	RefSeq	1485	chr1	-	159032274	159046647	ACACTGTCAAAAAATGGAGAAAAACTACAGCTGACATCTGGAGTTCATAGCACCATAAAG	9447	interferon-inducible protein AIM2	6.14156	4.70611
ASHGA5P052928	0.00429098	0.0334484	2.70205	up	protein_coding	NM_002598	CCDS5316.1	PDCD2	RefSeq	3133	chr6	-	170884659	170893780	GCAGGATGTAACAGATACACCGTAAAGGCATCTTAAAGCCTTGAAAAATGTTAATAATCT	5134	programmed cell death protein 2 isoform 1	6.95824	5.52419
ASHGA5P019361	0.0442749	0.108655	2.69954	up	protein_coding	NM_014719	CCDS5886.1	FAM115A	RefSeq	5682	chr7	-	143548460	143599172	TGGGCCCCGGAAACCAATAGAGCCATGGCGACTCCCTCTGCTGCCTTCGAGGCCCTTATG	9747	protein FAM115A isoform 1	5.55822	4.1255
ASHGA5P002555	0.00749392	0.0380335	2.69896	up	protein_coding	NM_003142	CCDS2237.1	SSB	RefSeq	1719	chr2	+	170655321	170668571	TGATGAACATGATGAACATGATGAAAATGGTGCAACTGGACCTGTGAAAAGAGCAAGAGA	6741	lupus La protein	6.78456	5.35215
ASHGA5P013849	0.00313233	0.0323621	2.69845	up	protein_coding	ENST00000397126	CCDS54240.1	ZNF208	GENCODE	9088	chr19	-	22148896	22193745	GAATCCCCAGTTATATGTTCTCATTTTGCTCAAGATCTTTGGCCAGAGCAGGGCATAGAA	7757	zinc finger protein 208 [Source:HGNC Symbol;Acc:12999]	6.97214	5.54001
ASHGA5P007453	0.0282271	0.0803266	2.6961	up	protein_coding	NM_004182	CCDS14285.1	UXT	RefSeq	619	chrX	-	47511190	47518579	TCCTACCAACCGTTCTTATTGCTGGCGGCCTGAGGAGCCCATCATGGCGACGCCCCCTAA	8409	protein UXT isoform 2	4.55563	3.12475
ASHGA5P010322	0.00307752	0.0323215	2.6947	up	protein_coding	NM_138728	CCDS850.1	ST7L	RefSeq	4459	chr1	-	113066140	113162040	TGGGAAGGCACCTTTCATCATGTTTCTGTTTACCCAAAAAAGGAGCTTCCTTTGTTCATC	54879	suppressor of tumorigenicity 7 protein-like isoform 3	4.91402	3.48389
ASHGA5P001192	0.0148998	0.0541699	2.69417	up	protein_coding	NM_005868	CCDS5635.1	BET1	RefSeq	3061	chr7	-	93620999	93633690	GCAGGCCTGGGTGAAGGAGTACCTCCTGGCAACTATGGGAACTATGGCTATGCTAATAGT	10282	BET1 homolog	4.74076	3.31093
ASHGA5P008928	0.0101712	0.0442415	2.693	up	protein_coding	NM_001190214	CCDS53937.1	PPIP5K1	RefSeq	5640	chr15	-	43825659	43882451	AGTGGCCTAGGGTTTGAAGGGTGTTCCATGGTGCCTACCATCTACCCTCTGGAAACACTG	9677	inositol hexakisphosphate and diphosphoinositol-pentakisphosphate kinase 1 isoform 6	6.24248	4.81327
ASHGA5P009595	0.0392885	0.100183	2.69262	up	protein_coding	NM_016185	CCDS45771.1	HN1	RefSeq	1602	chr17	-	73131343	73150775	AATAGCTCCCGAGTTTTGCGGCCTCCAGGTGGTGGATCCAATTTTTCATTAGGTTTTGAT	51155	hematological and neurological expressed 1 protein isoform 1	5.98695	4.55794
ASHGA5P007617	0.00638354	0.0354584	2.69248	up	protein_coding	NM_014659	CCDS32215.1	PPIP5K1	RefSeq	5564	chr15	-	43825659	43877090	CACCGAGATGGGTTTGAAGGGTGTTCCATGGTGCCTACCATCTACCCTCTGGAAACACTG	9677	inositol hexakisphosphate and diphosphoinositol-pentakisphosphate kinase 1 isoform 2	6.12826	4.69933
ASHGA5P008141	0.0343593	0.0913926	2.68628	up	protein_coding	ENST00000340313	CCDS31608.1	KCNK7	GENCODE	1298	chr11	-	65360325	65363467	GCACTTCTTGGTTACTTGCTTCTAGGACTCTTGGCCATGCTGCTGGCAGTGGAGACCTTC	10089	"potassium channel, subfamily K, member 7 [Source:HGNC Symbol;Acc:6282]"	4.41891	2.9933
ASHGA5P049128	0.00264937	0.0317647	2.683	up	protein_coding	NM_032626	CCDS45444.1	RBBP6	RefSeq	1780	chr16	+	24550907	24560722	GATGGCAACTACAAAAGCAGTATGTAAAAACACAATCTCACACTTTTTCTACACATTGCT	5930	E3 ubiquitin-protein ligase RBBP6 isoform 3	5.08808	3.66423
ASHGA5P013793	0.0164441	0.0572711	2.68294	up	protein_coding	NM_203416	CCDS53742.1	CD163	RefSeq	4107	chr12	-	7623411	7656414	AATTCCTCAGGAGGCCATTCTGAGCCACACTGAAAAGGAAAATGGGAATTTATAACCCAG	9332	scavenger receptor cysteine-rich type 1 protein M130 isoform b precursor	6.65262	5.22881
ASHGA5P054079	0.0136438	0.0518299	2.68073	up	protein_coding	NM_001006613	CCDS14507.1	WBP5	RefSeq	1023	chrX	+	102611379	102613397	CGTTGGAAGGTTAATCGAAACCATCCTTACCCCTATTTAATGTAGTTTACCTTGATTTTT	51186	WW domain-binding protein 5	4.70623	3.2836
ASHGA5P017152	0.00302911	0.0321505	2.6806	up	protein_coding	NM_001040057	CCDS47641.1	FAM133B	RefSeq	2468	chr7	-	92190071	92219706	TTTAACAAAGGCCTATATGAACCCAATAGCAATGGCGAGATCAAGGGGTCCAATCCAGTC	257415	protein FAM133B isoform 2	7.12232	5.69976
ASHGA5P055999	0.00524686	0.0340745	2.66732	up	protein_coding	NM_006568	CCDS9719.1	CGRRF1	RefSeq	1323	chr14	+	54976586	55005334	TGGCTGTGTGAAGTATTTTCAGCAGTGCCCAATGTGCAGGCAGTTTGTTCAGGAATCTTT	10668	cell growth regulator with RING finger domain protein 1	6.18905	4.77366
ASHGA5P002501	0.00327601	0.0326774	2.66707	up	protein_coding	NM_004109	CCDS8344.1	FDX1	RefSeq	3155	chr11	+	110300660	110335608	TAACAGACAGATCACGGTTGGGCTGCCAAATCTGTTTGACAAAATCTATGGACAATATGA	2230	"adrenodoxin, mitochondrial precursor"	6.61858	5.20333
ASHGA5P046478	0.0226218	0.069706	2.66609	up	protein_coding	NM_001128127	CCDS48090.1	GK	RefSeq	4572	chrX	+	30671475	30749577	TGTGAGCTTTTTACATAATGAAAGAACCCAGCAATTCTGTCTCTTAATGCAATGACACTA	2710	glycerol kinase isoform c	5.46344	4.04872
ASHGA5P005337	0.00596208	0.0347809	2.66483	up	protein_coding	NM_001160115	CCDS53969.1	C15orf40	RefSeq	552	chr15	-	83659370	83680393	GACGACCAAGGGTAAAAGCCAGAGCAAGGAACCAGAGAGACCACTTCCTCCCTTAGGTCC	123207	UPF0235 protein C15orf40 isoform d	5.46918	4.05514
ASHGA5P006873	0.0262219	0.0765612	2.66318	up	protein_coding	NM_032309	CCDS2098.1	CHCHD5	RefSeq	698	chr2	+	113342035	113346617	AACTGTGGAGGCACAGCCACTTCCTGCCTCCTGAGGACTCCTCTGACGGCAGGAAAACTG	84269	coiled-coil-helix-coiled-coil-helix domain-containing protein 5	5.24289	3.82973
ASHGA5P010259	0.00635552	0.0354584	2.66291	up	protein_coding	NM_020365	CCDS517.1	EIF2B3	RefSeq	2027	chr1	-	45316193	45452394	ATCAAGGACTGCTTGATTGGAAGTGGCCAGAGGATTGAAGCCAAAGCTAAACGAGTGAAT	8891	translation initiation factor eIF-2B subunit gamma isoform 1	6.14562	4.73261
ASHGA5P034545	0.00375933	0.0329783	2.6625	up	protein_coding	ENST00000358491	CCDS42537.1	ZNF429	GENCODE	2361	chr19	+	21688436	21721079	CCTACAAATGTAAACAATGTGACAAAGCTTTTACCCACTCCTCAAACCTTAGTAGTCATA	353088	zinc finger protein 429 [Source:HGNC Symbol;Acc:20817]	5.42671	4.01393
ASHGA5P028496	0.00353946	0.0328487	2.66083	up	protein_coding	NM_145203	CCDS9363.1	CSNK1A1L	RefSeq	2405	chr13	-	37677396	37679801	CCGTAAACACCCATATGATCTGGGATTTTGTTCATATTTTGAAATGGGAGCTTTTATGTT	122011	casein kinase I isoform alpha-like	4.85289	3.44102
ASHGA5P009771	0.0294375	0.0824299	2.65961	up	protein_coding	NM_152564	CCDS6281.1	VPS13B	RefSeq	14025	chr8	+	100025493	100889814	GAAAAATCTGTGACAACTACAAAACTTCTAGATGGCACTCATCAGCAGCATGGATTCCTC	157680	vacuolar protein sorting-associated protein 13B isoform 1	6.89334	5.48212
ASHGA5P008024	0.0179865	0.0603105	2.65835	up	protein_coding	NM_018288	CCDS5308.2	PHF10	RefSeq	1692	chr6	-	170104001	170124106	ATCATACTTTTTGTGTGGGCCTTGGTGCTATTCCATCAGGTCGCTGGATTTGTGACTGTT	55274	PHD finger protein 10 isoform a	9.63501	8.22448
ASHGA5P034549	0.00344151	0.0328172	2.65832	up	protein_coding	NM_203282	CCDS32983.1	ZNF254	RefSeq	3986	chr19	+	24269975	24312654	GTACTGACATCTCTAGCAATCTTTTTTGCCAGTGGCTTTAAATTGCCAATAAGTTAAAGA	9534	zinc finger protein 254	4.86797	3.45746
ASHGA5P037275	0.00107314	0.025374	2.65639	up	protein_coding	ENST00000382822	CCDS42917.1	KRTAP19-8	GENCODE	318	chr21	-	32410477	32410795	GTCTATCATCCTGACTTAATTCTCCTTTCAGGTCTTTTTACCCCCTCTGTGAATTGCGCA	728299	keratin associated protein 19-8 [Source:HGNC Symbol;Acc:33898]	9.16038	7.75091
ASHGA5P002233	0.00630499	0.0354179	2.65638	up	protein_coding	NM_032286	CCDS34134.1	MED10	RefSeq	1059	chr5	-	6372038	6378639	AAGTTTTTGAATATATAGATCAAGGTCGAAATCCCCAGCTCTACACCAAAGAGTGCCTGG	84246	mediator of RNA polymerase II transcription subunit 10	4.99667	3.58721
ASHGA5P034245	0.00044104	0.0211759	2.65371	up	protein_coding	NM_202001	CCDS12663.1	ERCC1	RefSeq	1291	chr19	-	45916691	45926820	GAGCCCCAAATAAACACAACCTGAGACCCCAAAGTTTTAAGGTGAAAAAAGAACCAAAGA	2067	DNA excision repair protein ERCC-1 isoform 1	8.06569	6.65768
ASHGA5P055464	0.00335951	0.032685	2.65032	up	protein_coding	NM_005811	CCDS8891.1	GDF11	RefSeq	4260	chr12	+	56137063	56146665	TGCTCTTAAGGTGGGGGATAGAGGATGCCTCCCCCACAGACCCTACCCCAAGACCCCTAG	10220	growth/differentiation factor 11 precursor	9.60242	8.19625
ASHGA5P035731	0.0487097	0.115397	2.64969	up	protein_coding	NM_005378	CCDS1687.1	MYCN	RefSeq	2613	chr2	+	16080682	16087129	TCGAGTTTGACTCGCTACAGCCCTGCTTCTACCCGGACGAAGATGACTTCTACTTCGGCG	4613	N-myc proto-oncogene protein	5.91775	4.51193
ASHGA5P018941	0.00452974	0.033633	2.64699	up	protein_coding	NM_198333	CCDS14442.1	P2RY10	RefSeq	1679	chrX	+	78200828	78217438	AAGCTCCAGGGAACCATAAATCCATGGCTAACCTTGACAAATACACTGAAACATTCAAGA	27334	putative P2Y purinoceptor 10	4.47157	3.06722
ASHGA5P000970	0.00284201	0.0318783	2.64567	up	protein_coding	ENST00000555709	CCDS9763.1	MTHFD1	GENCODE	3448	chr14	+	64854758	64926725	TTCTAAACAGATCACCATCCATCTTCAAGAAGCTACTTTGAAAGTCTGGCCAGTGTCTAT	4522	"methylenetetrahydrofolate dehydrogenase (NADP+ dependent) 1, methenyltetrahydrofolate cyclohydrolase, formyltetrahydrofolate synthetase [Source:HGNC Symbol;Acc:7432]"	6.56219	5.15856
ASHGA5P001461	0.00346103	0.0328172	2.64411	up	protein_coding	NM_007275	CCDS2819.1	TUSC2	RefSeq	1691	chr3	-	50362340	50365668	AATCTGATTCCTCAGGGCATCGTGAAGCTGGATCACCCCCGCATCCACGTGGATTTCCCT	11334	tumor suppressor candidate 2	8.99421	7.59143
ASHGA5P054187	0.00125715	0.0265654	2.64086	up	protein_coding	NM_003492	CCDS14739.1	TMEM187	RefSeq	1682	chrX	+	153237990	153248646	GACGCGTTGAACCCAGGGAAGAACCTGCTGAAAACCGATGACCCCCAGCATTGAAATGGA	8269	transmembrane protein 187	8.30051	6.8995
ASHGA5P011457	0.00912148	0.041762	2.64	up	protein_coding	NM_003336	CCDS14580.1	UBE2A	RefSeq	1799	chrX	+	118708498	118718379	GACCCCGTTTGAGGATGGAACATTTAAACTTACAATAGAATTCACTGAAGAATATCCAAA	7319	ubiquitin-conjugating enzyme E2 A isoform 1	5.84968	4.44915
ASHGA5P001231	0.00755744	0.0381883	2.63865	up	protein_coding	ENST00000223428	CCDS35074.1	ZNF510	GENCODE	5154	chr9	-	99518146	99540328	AGTCACCCAAAAGATTACAGAGGTGATGACCTGATCAAGCAGAACAAGAAAATCAAAGAC	22869	zinc finger protein 510 [Source:HGNC Symbol;Acc:29161]	5.03631	3.63651
ASHGA5P007390	0.000460113	0.0211759	2.63645	up	protein_coding	ENST00000332132	CCDS55426.1	FAM104B	GENCODE	1067	chrX	-	55169534	55187628	GCCCTGTACGGAAAAGAAGAAGAAATGGCAGTAAAGAGGGCAACCATCATTCCACCCAGC	90736	"family with sequence similarity 104, member B [Source:HGNC Symbol;Acc:25085]"	5.12607	3.72747
ASHGA5P049332	0.000531725	0.0218415	2.63346	up	protein_coding	NM_022774	CCDS453.1	DEM1	RefSeq	2217	chr1	+	40974432	40982214	AGCCAAATGAATAGAAGGTATGCTTTCAAGAATGTTGATCCTTCCTGCTCCTGTTGTACC	64789	probable exonuclease V	4.77669	3.37973
ASHGA5P017109	0.00523888	0.0340745	2.63036	up	protein_coding	NM_006524	CCDS34645.2	ZNF138	RefSeq	2504	chr7	+	64254770	64294025	GTTTTCTTGGCTCTGTGTTCTCGTTTTGCCCAAGACCTTTGGCTAGAGCAGAACATAAAA	7697	zinc finger protein 138 isoform 1	6.58747	5.19222
ASHGA5P001639	0.00388482	0.0329783	2.62953	up	protein_coding	NM_006166	CCDS9098.1	NFYB	RefSeq	3482	chr12	-	104510857	104532040	CATATCAACAGATTTCTGGTGTTCAGCAAATTCAGTTTTCATGATCTGAAGAAATGATGG	4801	nuclear transcription factor Y subunit beta	5.70919	4.31439
ASHGA5P012370	0.0214858	0.0675334	2.62941	up	protein_coding	NM_001082537	CCDS41835.1	TCTN1	RefSeq	2025	chr12	+	111051831	111086935	CAACAGGAAGGATTCCTGCCAGCTCCCAGGGGCTTTGGTTATAGAAGTGAAGTGGACTAA	79600	tectonic-1 isoform 2 precursor	4.95199	3.55725
ASHGA5P055013	0.0459939	0.111396	2.629	up	protein_coding	NM_145309	CCDS8208.1	LRTOMT	RefSeq	2658	chr11	+	71791376	71807938	GAACATCAAGCCCAAGAAGGCCTGGACCAAGCAGAATACACTTTGAGGCTCCCACGACCC	220074	leucine-rich repeat-containing protein 51 isoform 1	4.98755	3.59304
ASHGA5P003657	0.00690195	0.0366228	2.62763	up	protein_coding	NM_012100	CCDS42823.1	DNPEP	RefSeq	2438	chr2	-	220238179	220252662	GCTGTGCATCCCAACTACCTGGACAAGCATGAGGAGAACCACCGGCCTTTATTCCACAAG	23549	aspartyl aminopeptidase	5.58866	4.19489
ASHGA5P014640	0.00587092	0.0347584	2.62677	up	protein_coding	NM_001130483	CCDS46291.1	VRK2	RefSeq	1988	chr2	+	58273776	58387055	AAGCAGCTCAGTTTAGGTAGAAGCTTAGGCTATTGATTTGAACCCACTATTTTTTCTAAT	7444	serine/threonine-protein kinase VRK2 isoform 3	5.33551	3.94222
ASHGA5P055089	0.00440831	0.0334484	2.62497	up	protein_coding	NM_182533	CCDS38.2	C1orf86	RefSeq	745	chr1	-	2120987	2126214	TTGGCCGAAAGCACAGAAGACGTGACGTGGTGAGCGCCATCCAAGAGCCCTGCGCAGAGT	199990	uncharacterized protein C1orf86 isoform 2	6.41838	5.02608
ASHGA5P010183	0.000382763	0.0201625	2.623	up	protein_coding	NM_005717	CCDS1357.1	ARPC5	RefSeq	2000	chr1	-	183595327	183605076	GCCTGCGGCAAGGAAACATGACAGCTGCCCTACAGGCAGCTCTGAAGAACCCCCCTATCA	10092	actin-related protein 2/3 complex subunit 5 isoform 1	11.7217	10.3305
ASHGA5P001487	0.0164859	0.0572791	2.62077	up	protein_coding	NM_016047	CCDS1707.1	SF3B14	RefSeq	783	chr2	-	24290453	24299314	AAATCAGAGTGGGGAACACACCTGAAACTAGAGGAACAGCTTATGTGGTCTATGAGGACA	51639	pre-mRNA branch site protein p14	7.21604	5.82605
ASHGA5P016576	0.00583431	0.0347584	2.61784	up	protein_coding	ENST00000431837	CCDS44862.1	IRAK4	GENCODE	4147	chr12	+	44152746	44183346	CATTAAGAAGGTTCAACAGCTGCTGCAAGAGATGACAGCTTCTTAAAACTTTATTGGAAA	51135	interleukin-1 receptor-associated kinase 4 [Source:HGNC Symbol;Acc:17967]	4.64367	3.25529
ASHGA5P049840	0.0126632	0.0498262	2.6158	up	protein_coding	NM_001545	CCDS11711.1	ICT1	RefSeq	888	chr17	+	73008779	73017356	CATGAATCGGGAAAGGCTGAGACAAAAGAGAATTCATTCTGCTGTAAAGACAAGCAGGAG	3396	"peptidyl-tRNA hydrolase ICT1, mitochondrial precursor"	6.08578	4.69853
ASHGA5P035437	0.00483403	0.0338278	2.61472	up	protein_coding	NM_004882	CCDS2256.1	CIR1	RefSeq	1809	chr2	-	175212877	175260443	GAAGCAGAAGTAGAGAAGAAAGACTGTATGTGACAATTACCTGGGAATAAAAATATCTCC	9541	corepressor interacting with RBPJ 1	7.23148	5.84482
ASHGA5P052579	0.00982546	0.043588	2.614	up	protein_coding	NM_003472	CCDS34344.1	DEK	RefSeq	2879	chr6	-	18224399	18264799	AAGTAGAGAGGTTGACAATGCAAGTCTCTTCCTTACAGAGAGAGCCATTTACAATTGCAC	7913	protein DEK isoform 1	5.2988	3.91254
ASHGA5P000955	0.0204003	0.0653311	2.61254	up	protein_coding	NM_015994	CCDS9780.1	ATP6V1D	RefSeq	1823	chr14	-	67804580	67826720	ATTGAACATGTCATCATTCCCCGGATTGAACGTACTCTTGCTTATATCATCACAGAGCTG	51382	V-type proton ATPase subunit D	5.82457	4.43912
ASHGA5P000922	0.00804377	0.0393576	2.61169	up	protein_coding	NM_006739	CCDS13915.1	MCM5	RefSeq	2568	chr22	+	35796115	35820495	AAGGACTTCACCAAGCAGAAATACCCGGAGCACGCCATCCACAAGGTGCTGCAGCTCATG	4174	DNA replication licensing factor MCM5	5.80365	4.41866
ASHGA5P008511	0.0254501	0.0749306	2.6107	up	protein_coding	NM_015129	CCDS14584.1	SEPT6	RefSeq	3387	chrX	-	118750908	118827333	AGAAGAAAAATAATCCATGGCTGTGTACTGAATAGTATTCCCCGCTACAGCTGGACTGGA	23157	septin-6 isoform B	4.66373	3.27929
ASHGA5P053023	0.0149468	0.0542054	2.60829	up	protein_coding	ENST00000323037	CCDS5426.1	ZNRF2	GENCODE	3460	chr7	+	30323922	30407308	TGGTTTGAAGTAAATAGATCTTGCCCTGAGCACCCTTCAGATTAAGCGTCAGCTTCCTGT	223082	zinc and ring finger 2 [Source:HGNC Symbol;Acc:22316]	9.06286	7.67976
ASHGA5P048662	0.00560247	0.0344776	2.60824	up	protein_coding	NM_003825	CCDS10087.1	SNAP23	RefSeq	2650	chr15	+	42787503	42825259	GACAAATGGTCAGCTTCAGCAACCAACAACGGGAGCAGCCAGTGGTGGATACATTAAACG	8773	synaptosomal-associated protein 23 isoform SNAP23A	4.83051	3.44744
ASHGA5P027361	0.0101437	0.0442352	2.60721	up	protein_coding	NM_001113202	CCDS31837.1	NACA	RefSeq	1061	chr12	-	57106210	57119326	TATCCCAGCAAGCACAACTAGCAGCTGCTGAGAAATTCAAAGTTCAAGGTGAAGCTGTCT	4666	nascent polypeptide-associated complex subunit alpha isoform b	8.1693	6.7868
ASHGA5P003776	0.0373896	0.0968933	2.60673	up	protein_coding	NM_012173	CCDS5954.1	FBXO25	RefSeq	2452	chr8	+	356807	419875	TATTCTCGCCTGGCAACAACAGCTACAGGATCTTCAGATGACTAAGCAAGTGAACAATGG	26260	F-box only protein 25 isoform 3	5.65836	4.27611
ASHGA5P043797	0.0424618	0.105586	2.60104	up	protein_coding	NM_015379	CCDS5656.1	BRI3	RefSeq	809	chr7	+	97910978	97920839	GACCGTCACCCGCTATCCTGCCAACTCTATCGTGGTCGTAGGAGGCTGTCCTGTCTGCAG	25798	brain protein I3 isoform a	8.11849	6.73941
ASHGA5P015305	0.00575581	0.0346617	2.60089	up	protein_coding	NM_001137608	CCDS46990.1	ZNF732	RefSeq	2193	chr4	-	264463	289944	TACATGAGACAGTAGCCAAACACCCAGCTGTGTGTTCTCATTTCACCCAAGACTTTTTGC	654254	zinc finger protein 732	4.55839	3.17938
ASHGA5P001354	0.00320016	0.0326327	2.59342	up	protein_coding	NM_001175	CCDS8671.1	ARHGDIB	RefSeq	1216	chr12	-	15094949	15114562	AGCACTGAATAAATAGATCAGAATGACTGAAAAAGCCCCAGAGCCACATGTGGAGGAGGA	397	rho GDP-dissociation inhibitor 2	4.93407	3.55922
ASHGA5P010287	0.0331997	0.089496	2.59035	up	protein_coding	NM_001266	CCDS45489.1	CES1	RefSeq	2021	chr16	-	55836763	55867075	CCCCAGAGAGAGTCAACCCCTTCTGGGCACTGTGATTGATGGGATGCTGCTGCTGAAAAC	1066	liver carboxylesterase 1 isoform c precursor	7.97204	6.59889
ASHGA5P051193	0.00353702	0.0328487	2.58973	up	protein_coding	ENST00000263202	CCDS13761.1	UFD1L	GENCODE	1783	chr22	-	19437463	19466738	CCCAATTATGAATTTAAACTTGGTAAGATAACTTTCATCAGAAATTCACGTCCCCTTGTC	7353	ubiquitin fusion degradation 1 like (yeast) [Source:HGNC Symbol;Acc:12520]	7.59562	6.22282
ASHGA5P055987	0.00793921	0.0391655	2.58727	up	protein_coding	NM_015684	CCDS45102.1	ATP5S	RefSeq	1359	chr14	+	50779046	50789743	GATCACATGGGTAACTACCCTATCGTTTTGCTAATAGAAAATGCAGATGATTTGCAGTGA	27109	"ATP synthase subunit s, mitochondrial isoform c precursor"	5.27662	3.90519
ASHGA5P011801	0.00393637	0.0329783	2.58633	up	protein_coding	NM_001166422	CCDS55452.1	HDAC8	RefSeq	1033	chrX	-	71787431	71792953	ATGCAAAGAAAGAGACGTGTGTGTATGTGGCACTTTACAAGGCATTCTGAAGAAATCCAA	55869	histone deacetylase 8 isoform 5	5.85458	4.48367
ASHGA5P013266	0.00412071	0.0330909	2.58412	up	protein_coding	NM_001005781	CCDS2352.1	SUMO1	RefSeq	1078	chr2	-	203070902	203103322	AACAGTTTAGTTTTAAAATTTGAGGGTCTGGACCAAAAGAAGAGGAATATCAGGTTGAAG	7341	small ubiquitin-related modifier 1 isoform a precursor	6.88264	5.51297
ASHGA5P053540	0.017784	0.0599885	2.58396	up	protein_coding	NM_032334	CCDS6320.1	UTP23	RefSeq	3693	chr8	+	117778741	117786921	AGAAAAAGAATTCGGAACAGATCTAACCCAAAAGTACTTTCTGAGAAGCAGAATGCAGAA	84294	rRNA-processing protein UTP23 homolog	6.10073	4.73115
ASHGA5P006861	0.00964126	0.0431527	2.57569	up	protein_coding	NM_173206	CCDS32825.1	PIAS2	RefSeq	4573	chr18	-	44395672	44497495	GTCATCAGATTTGCCAGGAGAACAAAGAAGAAATGATATTAATAATGAACTGAAGCTTGG	9063	E3 SUMO-protein ligase PIAS2 isoform alpha	6.46669	5.10173
ASHGA5P050361	0.0125619	0.049615	2.57453	up	protein_coding	NM_001018067	CCDS30746.1	SERBP1	RefSeq	6764	chr1	-	67873492	67896123	ATTCCCAGCTCTGGCTTAACTGGATGCCATAAGACAACCCTGGTTCCTTTGTGAACCCTT	26135	plasminogen activator inhibitor 1 RNA-binding protein isoform 1	8.66145	7.29714
ASHGA5P001184	0.0362017	0.0949257	2.57176	up	protein_coding	NM_005692	CCDS5922.1	ABCF2	RefSeq	2262	chr7	-	150904922	150924317	CCCACAACGTGTGCACCCTGACATTGGCATCTCTGCCAAGGCCATGAGCATCATGAACTC	10061	ATP-binding cassette sub-family F member 2 isoform b	4.91541	3.55266
ASHGA5P049629	0.0133437	0.0513639	2.56969	up	protein_coding	NM_001001435	CCDS32627.1	CCL4L1	RefSeq	674	chr17	+	34640033	34641840	CTCTTTCTCTGCTGTTGCAAATACATGGATAACACCGTTAATTCCATGTGTTTTCATAAT	9560	C-C motif chemokine 4-like precursor	9.47348	8.11189
ASHGA5P055682	0.0139431	0.0524127	2.5692	up	protein_coding	NM_020936	CCDS9251.1	DDX55	RefSeq	2638	chr12	+	124086671	124105482	ATCTCAGATTTGGAAGATGACTGCTGATTCCAGTGCCACAGATGAACCCACAAGGACATA	57696	ATP-dependent RNA helicase DDX55	4.9058	3.54449
ASHGA5P033198	0.0030568	0.0322357	2.56884	up	protein_coding	NM_002507	CCDS11549.1	NGFR	RefSeq	3420	chr17	+	47572654	47592382	GCAGGTGCCACCGGCCGCGCCATGGACGGGCCGCGCCTGCTGCTGTTGCTGCTTCTGGGG	4804	tumor necrosis factor receptor superfamily member 16 precursor	7.29731	5.93619
ASHGA5P009030	0.00409316	0.0330909	2.56555	up	protein_coding	NM_004834		MAP4K4	RefSeq	7334	chr2	+	102314164	102511152	ACACATGTAAGAAAGAACCCACACTCTATGATCCAGTGTAGCATCAAACCCCATGCAATC	9448	mitogen-activated protein kinase kinase kinase kinase 4 isoform 1	6.21852	4.85925
ASHGA5P037012	0.0177951	0.060006	2.56162	up	protein_coding	NM_001172132	CCDS54454.1	HCK	RefSeq	2234	chr20	+	30639990	30689657	CCGCTGTCATGAGTTACAGTCCTTCCAGGATGTGCCTCTGAAAATGGATTGCATATAAAT	3055	tyrosine-protein kinase HCK isoform e	7.46945	6.11239
ASHGA5P011661	0.00615098	0.0350707	2.55835	up	protein_coding	NM_001195007	CCDS53299.1	PPIE	RefSeq	1271	chr1	+	40204516	40229586	GCAAATTGAGGTTGCCCCAGATACCAAGGCATCAAAAGCCAGGGGATCCAGAAAAAACAA	10450	peptidyl-prolyl cis-trans isomerase E isoform 4	4.95034	3.59513
ASHGA5P049966	0.0337869	0.090446	2.55737	up	protein_coding	NM_002828	CCDS11865.1	PTPN2	RefSeq	3418	chr18	-	12792300	12884334	AAAGAAAAAGGTGGTTATATTGGCAACCTATTCTCACTAAGATGGGGTTTATGTCAGTCA	5771	tyrosine-protein phosphatase non-receptor type 2 isoform 1	5.42859	4.07393
ASHGA5P054002	0.0186064	0.0615401	2.55496	up	protein_coding	NM_004493	CCDS14354.1	HSD17B10	RefSeq	963	chrX	-	53458205	53461323	AATAGTGGGCATGACACTGCCCATTGCTCGGGATCTGGCTCCCATAGGTATCCGGGTGAT	3028	3-hydroxyacyl-CoA dehydrogenase type-2 isoform 1	4.56017	3.20687
ASHGA5P030135	0.00245848	0.0313471	2.55171	up	protein_coding	NM_002654	CCDS32284.1	PKM	RefSeq	2516	chr15	-	72491369	72523727	TGCCATCTACCACTTGCAATTATTTGAGGAACTCCGCCGCCTGGCGCCCATTACCAGCGA	5315	pyruvate kinase isozymes M1/M2 isoform a	7.21386	5.8624
ASHGA5P037259	0.0370496	0.096365	2.5516	up	protein_coding	NM_181608	CCDS13595.1	KRTAP19-2	RefSeq	159	chr21	-	31859508	31859667	GGAGATGGCTGCTGCTGCCCATCATGCTACAGAAGATATAGATTCACTGGCTTCTACTAA	337969	keratin-associated protein 19-2	7.43077	6.07936
ASHGA5P051518	0.0134671	0.0516038	2.54941	up	protein_coding	NM_001640	CCDS2801.1	APEH	RefSeq	2775	chr3	+	49711434	49720934	ATGAATGCTGTGCTCTGGCTACGCACACACTTGGGCAGCTGAAGCCCTGCCATTCTGCAT	327	acylamino-acid-releasing enzyme	6.7807	5.43054
ASHGA5P017958	0.0329756	0.0890804	2.54379	up	protein_coding	NM_001134693		OST4	RefSeq	509	chr2	-	27293341	27294567	GACTGGTCAGGATGATCACGGACGTGCAGCTCGCCATCTTCGCCAACATGCTGGGCGTGT	100128731	dolichyl-diphosphooligosaccharide--protein glycosyltransferase subunit 4	7.53531	6.18833
ASHGA5P007368	0.0465933	0.112077	2.54365	up	protein_coding	NM_201444	CCDS8896.1	DGKA	RefSeq	2801	chr12	+	56325811	56347807	TGCAGACGCCCTGTACAATCAAGATCACCCACAAGAACCAGATGCCCATGCTCATGGGCC	1606	diacylglycerol kinase alpha	6.65062	5.30372
ASHGA5P014448	0.0319862	0.0870076	2.54279	up	protein_coding	NM_001142645	CCDS46476.1	TMEM194B	RefSeq	3637	chr2	-	191371618	191399468	CTCCTAGCAAATTTGCAGACTTTGTTCTTGGAGGAAGCCACTTGTCACCTGAAGAAATCA	100131211	transmembrane protein 194B precursor	5.33849	3.99207
ASHGA5P011420	0.0223329	0.0691297	2.54244	up	protein_coding	NM_014060	CCDS14601.1	MCTS1	RefSeq	9805	chrX	+	119737743	119755016	CTTTACCCTGCTGCAGTAGATACCATTGTTGCTATCATGGCAGAAGGAAAACAGCATGCT	28985	malignant T-cell-amplified sequence 1 isoform 1	6.59157	5.24536
ASHGA5P009250	0.0255956	0.0752208	2.54019	up	protein_coding	NM_139323	CCDS13339.1	YWHAB	RefSeq	3015	chr20	+	43514343	43537161	CCCTCCCACGGGAATGACAATGGATAAAAGTGAGCTGGTACAGAAAGCCAAACTCGCTGA	7529	14-3-3 protein beta/alpha	6.12739	4.78246
ASHGA5P017800	0.00372523	0.0329783	2.53797	up	protein_coding	NM_001111112	CCDS47043.1	UBE2K	RefSeq	5130	chr4	+	39699663	39784410	AGCAAATCAGAATGCAGTAATAGTGGCCTTGTCTTCAAAATCATGGGATGTAGAGACTGC	3093	ubiquitin-conjugating enzyme E2 K isoform 2	6.78072	5.43704
ASHGA5P005144	0.00775064	0.0386796	2.53707	up	protein_coding	NM_001919	CCDS10464.1	ECI1	RefSeq	1069	chr16	-	2289872	2301602	TGAGACCCAGCTGGGCATCATCGCCCCTTTCTGGTTGAAAGACACCCTGGAGAACACCAT	1632	"enoyl-CoA delta isomerase 1, mitochondrial isoform 1 precursor"	5.45373	4.11056
ASHGA5P013552	0.0492832	0.116376	2.5364	up	protein_coding	NM_017918	CCDS3683.2	CCDC109B	RefSeq	1298	chr4	+	110481354	110608872	CACTCGACAGGATTATACTTACTCAGCTGTTAAGAGTAGGCAATTTCTTCAGTTCTTCCA	55013	coiled-coil domain-containing protein 109B	7.46078	6.11799
ASHGA5P006606	0.0169851	0.0583566	2.53487	up	protein_coding	ENST00000320936	CCDS12059.1	CIRBP	GENCODE	1397	chr19	+	1269266	1273171	GTTATGACAGTTACGCTACACACAACGAGTAAAAACCCTTCCTGCTCAAGATCGTCCTTC	1153	cold inducible RNA binding protein [Source:HGNC Symbol;Acc:1982]	7.65553	6.31362
ASHGA5P016784	0.0338952	0.0905832	2.5341	up	protein_coding	NM_001005851	CCDS46077.1	ZNF780B	RefSeq	8664	chr19	-	40534166	40562115	ACCTAGCTGGGGGAGAAGCCCGAGGAAGATTGACCAATTTTGTAATTCTAGAAACATGGT	163131	zinc finger protein 780B	5.15829	3.81681
ASHGA5P002272	0.00354538	0.0328487	2.53403	up	protein_coding	NM_001799	CCDS3999.1	CDK7	RefSeq	1534	chr5	+	68530621	68573257	CTTAGAACAAGGAGGATTGCCCAAGAAACTAATTTTTTAAAGAGAACACTGGACAACATT	1022	cyclin-dependent kinase 7	6.34042	4.99899
ASHGA5P013848	0.00647299	0.0355643	2.53377	up	protein_coding	ENST00000397121	CCDS42539.1	ZNF676	GENCODE	2934	chr19	-	22361902	22379753	GAACCCCCAGTTATATGTTCTCATTTTTCCCAAGAGTTTTGGCCAGAGCAAGGCATAGAA	163223	zinc finger protein 676 [Source:HGNC Symbol;Acc:20429]	12.3451	11.0038
ASHGA5P050371	0.0044079	0.0334484	2.53327	up	protein_coding	NM_002936	CCDS1647.1	RNASEH1	RefSeq	1648	chr2	-	3592690	3605940	AGAGAAGGAGCTAAACAATCGGAAGACTGAGCCATGTGACTTTAGTCCTTGGGAGAACTT	246243	ribonuclease H1 precursor	5.97464	4.63364
ASHGA5P012861	0.000745547	0.023569	2.53152	up	protein_coding	NM_001033002	CCDS32536.1	RPAIN	RefSeq	1679	chr17	+	5322960	5336340	AAACCCACTCATCTGTCCTGTATGTACAAAGTACAACCTGAGAATCACAAGCGGTGTGGT	84268	RPA-interacting protein isoform b	6.1048	4.7648
ASHGA5P001840	0.00847087	0.040151	2.53119	up	protein_coding	ENST00000246551	CCDS32998.1	HCST	GENCODE	507	chr19	+	36393381	36395173	AGATCATCACTCCCTGCCTTTTACCCTGGCACTTCAGGCTCTTGTTCCGGATGTGGGTCC	10870	hematopoietic cell signal transducer [Source:HGNC Symbol;Acc:16977]	10.3567	9.01692
ASHGA5P030879	0.0159989	0.0563923	2.53111	up	protein_coding	NM_001042371	CCDS42104.1	PGP	RefSeq	3136	chr16	-	2261602	2264822	ATCATCGGGAAGCCCAGCCGCTTCATTTTCGACTGCGTGTCCCAGGAATACGGCATCAAC	283871	phosphoglycolate phosphatase	6.39951	5.05974
ASHGA5P018009	0.0046927	0.0338278	2.52954	up	protein_coding	NM_014760	CCDS33698.1	TATDN2	RefSeq	4909	chr3	+	10290176	10322906	TAAGCAGAGAAGGTACAGTCCTCGGGAGTCTCCTAGAAAAGGGCGACCAGCAGCCTGACA	9797	putative deoxyribonuclease TATDN2	5.75305	4.41417
ASHGA5P055932	0.00546179	0.0343796	2.52537	up	protein_coding	NM_044472	CCDS222.1	CDC42	RefSeq	1530	chr1	+	22379119	22417296	CTCAACCCAAAAGGAAGTGCTGTATATTCTAAACTGTTTTCTCCTTCCCTTCTTTGCTGC	998	cell division control protein 42 homolog isoform 2	8.19082	6.85433
ASHGA5P054058	0.0145071	0.0534217	2.5224	up	protein_coding	NM_000169	CCDS14484.1	GLA	RefSeq	1418	chrX	-	100652778	100663001	CTAGAAAATACAATGCAGATGTCATTAAAAGACTTACTTTAAAATGTTTATTTTATTGCC	2717	alpha-galactosidase A precursor	4.64296	3.30817
ASHGA5P001207	0.0112788	0.0469542	2.52056	up	protein_coding	NM_003910	CCDS5663.1	BUD31	RefSeq	1060	chr7	+	99006600	99017239	AGCAAGCTGGAAGTGGGCCGCATCATCGAGTGCACACACTGTGGCTGTCGTGGCTGCTCT	8896	protein BUD31 homolog	6.75226	5.41852
ASHGA5P000904	0.00284027	0.0318783	2.51609	up	protein_coding	NM_006498	CCDS13950.1	LGALS2	RefSeq	543	chr22	-	37966252	37976024	TCAGAGGTCAAGTTCACAGTGACCTTTGAGAGTGACAAATTCAAGGTGAAGCTGCCAGAT	3957	galectin-2	7.58723	6.25604
ASHGA5P052623	0.00410263	0.0330909	2.51409	up	protein_coding	NM_013941	CCDS34364.1	OR10C1	RefSeq	1039	chr6	+	29407715	29408754	AAAGAGAACCATCCAGAAAACGGTGCCTATGGAGATTTGAAAAGGGGGCGATAGTGACTT	442194	olfactory receptor 10C1	6.0984	4.76837
ASHGA5P012551	0.0340374	0.0908408	2.51161	up	protein_coding	NM_019593	CCDS13090.1	GPCPD1	RefSeq	5478	chr20	-	5525079	5591672	CAACCACGATCAATAACCCCTTTAGAAAGCGAAATTATTATTGACGATGGACAATTTGGA	56261	glycerophosphocholine phosphodiesterase GPCPD1	5.11678	3.78816
ASHGA5P001061	0.0493778	0.116492	2.51089	up	protein_coding	NM_020188	CCDS10930.1	CMC2	RefSeq	740	chr16	-	81009698	81040502	CACGAGTCGGGTTGCACTGCTGTGATCCATCCTCATCTCCTAAAGATGCATCCTGACTTA	56942	COX assembly mitochondrial protein 2 homolog	5.44954	4.12135
ASHGA5P004083	0.00704409	0.0369507	2.5095	up	protein_coding	NM_006324	CCDS10916.1	CFDP1	RefSeq	1281	chr16	-	75327607	75467387	CCGGGTCAGGGTTAAAAAGATCAAGTGGCATGAGCAGCCTTTTGGGGAAAATTGGTGCCA	10428	craniofacial development protein 1	5.58679	4.25939
ASHGA5P013083	0.000645635	0.0232406	2.50851	up	protein_coding	NM_001047434	CCDS43058.1	DPH3	RefSeq	3990	chr3	-	16298567	16306496	ATTTCTATCCCTGCCCATGTGGAGATAACTTCTCCATCACCAAGGATCAGTTTGTGTGTG	285381	DPH3 homolog isoform 2	6.34861	5.02178
ASHGA5P001966	0.00737531	0.0377476	2.50558	up	protein_coding	NM_003616	CCDS9669.1	GEMIN2	RefSeq	1368	chr14	+	39583487	39606177	TGGTTAGCAGGTATTTTGACCAACGTGATTTAGCTGATGAGCCATCTTGATGTAGCTGAT	8487	gem-associated protein 2 isoform alpha	4.82019	3.49504
ASHGA5P035774	0.00287488	0.0318783	2.50548	up	protein_coding	ENST00000296102	CCDS1761.1	MRPL33	GENCODE	518	chr2	+	27994583	28002608	TCAACACCAAGAGAAACCGACTGCGGGAAAAACTGACTCTTTTGCATTATGATCCAGTTG	9553	mitochondrial ribosomal protein L33 [Source:HGNC Symbol;Acc:14487]	6.46123	5.13615
ASHGA5P004952	0.00709064	0.0370613	2.50503	up	protein_coding	NM_018455	CCDS10931.1	CENPN	RefSeq	1465	chr16	+	81040102	81056487	TCTGGGTCAGGAGTTAGAAGCTACTGGGAAAATCTACCTCCGACAAGAGGAGATCATTTT	55839	centromere protein N isoform 3	5.67182	4.34699
ASHGA5P004449	0.000467292	0.0211759	2.50059	up	protein_coding	NM_001003714	CCDS34692.1	ATP5J2	RefSeq	411	chr7	-	99055783	99063824	TGAGTGTCCGGCCCCAGTACCAGTGAAGGACAAGAAACTTCTGGAGGTCAAACTGGGGGA	9551	"ATP synthase subunit f, mitochondrial isoform 2c"	8.68749	7.36522
ASHGA5P046715	0.0117559	0.0477861	2.49788	up	protein_coding	ENST00000544824	CCDS53524.1	MTRNR2L7	GENCODE	1494	chr10	-	37890365	37891859	GGATGCTATCTCAATCTAAAAAATCATCACCACCCTACCCAAGAACAGGGTTTGTTAAGA	100288485	MT-RNR2-like 7 [Source:HGNC Symbol;Acc:37164]	8.44048	7.11978
ASHGA5P007193	0.0190312	0.0623671	2.49776	up	protein_coding	NM_003666	CCDS1278.1	BLZF1	RefSeq	2344	chr1	+	169337193	169365780	GATTGCCCTTTAACAGTCAATATGTTGGAGGCATGCTAAGAATAAACAACTAAATAACTG	8548	Golgin-45	5.20494	3.88431
ASHGA5P012801	0.0244122	0.0727794	2.49516	up	protein_coding	NM_001135919	CCDS45021.1	SLC46A3	RefSeq	2828	chr13	-	29274217	29293150	CTTCAGACAGAGCCTGTTAAGCTGCTATTGATAGTCGGAGCTTATATACTGTGACTTCTG	283537	solute carrier family 46 member 3 isoform b precursor	5.02905	3.70992
ASHGA5P048537	0.0133564	0.0513639	2.4931	up	protein_coding	NM_001803	CCDS30647.1	CD52	RefSeq	523	chr1	+	26644410	26647014	TCTTCTGCTTCAGTTGAGGTGACACGTCTCAGCCTTAGCCCTGTGCCCCCTGAAACAGCT	1043	CAMPATH-1 antigen precursor	10.3469	9.02899
ASHGA5P010911	0.000841224	0.0241396	2.49169	up	protein_coding	NM_198928	CCDS1179.1	PYHIN1	RefSeq	2093	chr1	+	158901336	158946849	CTTCACCAAGAAGGATGAAACCCACCCAGGAGCACAGTCATCGCCTGCAAACTTTAGAAT	149628	pyrin and HIN domain-containing protein 1 isoform alpha 2	6.70609	5.38897
ASHGA5P001296	0.0109488	0.0461272	2.49029	up	protein_coding	NM_021970	CCDS3652.1	LAMTOR3	RefSeq	4280	chr4	-	100799494	100815703	GAGAAGGGGGTTCATCATGGCGGATGACCTAAAGCGATTCTTGTATAAAAAGTTACCAAG	8649	ragulator complex protein LAMTOR3 isoform 1	5.05133	3.73502
ASHGA5P008039	0.0434241	0.10726	2.49028	up	protein_coding	NM_022734	CCDS9562.1	METTL17	RefSeq	1729	chr14	+	21457964	21465194	GGCACGGCAGGGATTTGTATCGTTGTGCCCGTGTCAGCTCCTGGGGAGATCTTTTACCTG	64745	"methyltransferase-like protein 17, mitochondrial isoform 2 precursor"	6.83505	5.51874
ASHGA5P007474	0.0399545	0.101302	2.48567	up	protein_coding	NM_148896	CCDS11790.1	NPB	RefSeq	634	chr17	+	79860071	79860781	GCGGAGCCTCGCTGTGTGCGTCCAGGACGTCGCCCCAAACCTGCAGAGGTGCGAGCGGCT	256933	neuropeptide B preproprotein	5.25929	3.94566
ASHGA5P001494	0.00229586	0.0309205	2.48541	up	protein_coding	NM_012198	CCDS2218.1	GCA	RefSeq	3241	chr2	+	163200582	163219148	GCGAATTTCATATATGACGATTTTTTGCAGGGCACTATGGCAATTTGAATGCTTAGAATT	25801	grancalcin	6.64768	5.3342
ASHGA5P000683	0.016396	0.0571811	2.48406	up	protein_coding	NM_001017408	CCDS34523.1	GOPC	RefSeq	4616	chr6	-	117881432	117923705	CTGACTCTGGTACCATTAAGGCAAAATTGGAAAGAGAGCTTGAGGCAAACAAAAAAGAAA	57120	Golgi-associated PDZ and coiled-coil motif-containing protein isoform b	5.15872	3.84602
ASHGA5P044357	0.00910708	0.041762	2.4829	up	protein_coding	NM_018440	CCDS6227.1	PAG1	RefSeq	10759	chr8	-	81880045	82024303	AGTGTTAATGTAGAGAGTATCCTTGGAAATTCATGTGATCCAGAAGAGGAGGCCCCACCA	55824	phosphoprotein associated with glycosphingolipid-enriched microdomains 1	4.32526	3.01323
ASHGA5P054266	0.00317301	0.0325513	2.48248	up	protein_coding	NM_003268	CCDS31033.1	TLR5	RefSeq	4277	chr1	-	223282747	223316624	CATCTCCTAATCAAAGGAGCAATTTCCAACTTATCTCAAGCCACAAATAACTCTTCACTT	7100	toll-like receptor 5 precursor	4.99526	3.68348
ASHGA5P006131	0.00662634	0.0360205	2.48171	up	protein_coding	NM_003703	CCDS33945.1	NOP14	RefSeq	2939	chr4	-	2939663	2965118	AAATCATGGAACGGGATGCGGAAAGAAAGCGGAAAGTAAAGCAGCTTTTTAACAGCCTGG	8602	nucleolar protein 14	5.86172	4.55038
ASHGA5P018173	0.00186715	0.0290776	2.47797	up	protein_coding	NM_001142577	CCDS46079.1	ZNF780A	RefSeq	3615	chr19	-	40578898	40596845	AAAGTCAAGGGGGAGAAGCCCGAGGAAGATTGACCAGTTTTGTAATTCTAGCAACATGGT	284323	zinc finger protein 780A isoform a	5.95429	4.64513
ASHGA5P051093	0.01028	0.044487	2.47706	up	protein_coding	NM_001001992	CCDS42912.1	USP16	RefSeq	2986	chr21	+	30396937	30426807	ATCTGACGCCAAGATCTGAACCTCACTGTCTGGTTCTTAGTTTGGACAACTGGAGTGTAT	10600	ubiquitin carboxyl-terminal hydrolase 16 isoform b	6.40372	5.09509
ASHGA5P019886	0.021149	0.0668047	2.47343	up	protein_coding	NM_003135	CCDS4108.1	SRP19	RefSeq	1502	chr5	+	112196884	112204089	TTCCCATCACGTAAGTCAGTAATGTTGTATGCAGCAGAAATGATACCTAAACTAAAAACA	6728	signal recognition particle 19 kDa protein isoform 1	5.86905	4.56254
ASHGA5P012665	0.0195757	0.0634887	2.47169	up	protein_coding	NM_001010990	CCDS32457.1	HERPUD1	RefSeq	2123	chr16	+	56965747	56977793	GCTTCCAAAGGTGGCTGAATCCACAGAGGAGCCTGCTGGTTCTAATCGGGGACAGTATCC	9709	homocysteine-responsive endoplasmic reticulum-resident ubiquitin-like domain member 1 protein isoform 3	5.8016	4.49611
ASHGA5P004239	0.0059436	0.0347809	2.47063	up	protein_coding	NM_138476	CCDS9620.1	MDP1	RefSeq	760	chr14	-	24683142	24685276	AGCAAACTGGGTGTTACCTGCATTCACATCCAGAATGGAATGAATCTTCAAACTCTAAGT	145553	magnesium-dependent phosphatase 1 isoform 1	5.96109	4.65622
ASHGA5P009170	0.00538444	0.0342414	2.46465	up	protein_coding	NM_005816	CCDS2958.1	CD96	RefSeq	4433	chr3	+	111260925	111371206	ATGGTCGGTGGAGGATAATGGAACTCAGGAAACACTTATCTCCCAAAATCACCTCATCAG	10225	T-cell surface protein tactile isoform 2 precursor	5.21664	3.91526
ASHGA5P010580	0.00375817	0.0329783	2.46363	up	protein_coding	NM_016326	CCDS10806.1	CKLF	RefSeq	633	chr16	+	66586465	66600190	ACGTGAAGATGCTGCGGCTGGTGTTTGCACTTGTGACAGCAGTATGCTGTCTTGCCGACG	51192	chemokine-like factor isoform c	6.66197	5.36118
ASHGA5P010099	0.00133523	0.0270465	2.46113	up	protein_coding	NM_205545	CCDS6388.1	LYPD2	RefSeq	550	chr8	-	143831627	143833952	AAACCATGTGCAAGACCACACTCTACTCCCGGGAGATAGTGTACCCCTTCCAGGGGGACT	137797	ly6/PLAUR domain-containing protein 2 precursor	7.92335	6.62402
ASHGA5P011126	0.0182266	0.0607843	2.46064	up	protein_coding	NM_001779	CCDS888.1	CD58	RefSeq	1153	chr1	-	117057155	117113715	GACAGAACCAACTCCAATTGATTGGTAACAGAAGATGAAGACAACAGCATAACTAAATTA	965	lymphocyte function-associated antigen 3 isoform 1	6.95383	5.6548
ASHGA5P012096	0.00290276	0.0319013	2.45874	up	protein_coding	NM_052889	CCDS41705.1	CARD16	RefSeq	758	chr11	-	104912052	104916051	CTCTCAGCAGGTCCGATACCTGGAAATTAGCTTAGTACACAAGACTCCCAATTACTATTT	114769	caspase recruitment domain-containing protein 16 isoform 2	7.63748	6.33956
ASHGA5P013818	0.00306615	0.0322997	2.45873	up	protein_coding	NM_006084	CCDS9615.1	IRF9	RefSeq	1699	chr14	+	24630421	24635774	TGGAGCTCTTCAGAACCGCCTACTTCTGCAGAGACTTGGTCAGGTACTTTCAGGGCCTGG	10379	interferon regulatory factor 9	6.2977	4.99979
ASHGA5P053795	0.0103602	0.0446631	2.45409	up	protein_coding	ENST00000367364	CCDS44291.1	PTPRC	GENCODE	1017	chr1	+	198608226	198662335	ATGTATTTGTGGCTTAAACTCTTGGCATTTGGCTTTGCCTTTCTGGACACAGAAGTATTT	5788	"protein tyrosine phosphatase, receptor type, C [Source:HGNC Symbol;Acc:9666]"	6.13881	4.84362
ASHGA5P030136	0.00156371	0.0280187	2.454	up	protein_coding	NM_000520	CCDS10243.1	HEXA	RefSeq	2437	chr15	-	72635777	72668520	TGTCCAGGCCCAACCCCTCAATGTAGGCTTCTGTGAGCAGGAGTTTGAACAGACCTGAGC	3073	beta-hexosaminidase subunit alpha preproprotein	8.80083	7.5057
ASHGA5P047465	0.0295905	0.0827219	2.45395	up	protein_coding	NM_012339	CCDS7294.1	TSPAN15	RefSeq	1726	chr10	+	71211225	71267423	TGAAAGTGCCTTCCTGGCTCCAGCCATCATCCTCATCCTCCTGGGCGTCGTCATGTTCAT	23555	tetraspanin-15	7.60756	6.31246
ASHGA5P051172	0.0157818	0.0560562	2.45367	up	protein_coding	NM_206889	CCDS46656.1	DIP2A	RefSeq	3121	chr21	+	47878861	47970023	TGTGCTGCAGGTGGGCGCCCCGGCACGGCCTATGGTTCGGTGAATCTCCCAAGCTGGCAC	23181	disco-interacting protein 2 homolog A isoform b	5.35784	4.0629
ASHGA5P000851	0.00484569	0.0338278	2.45341	up	protein_coding	NM_012201	CCDS32485.1	GLG1	RefSeq	8300	chr16	-	74481325	74641042	TCAAGGACAGGCTACAATACAGGTCAGAGACAATGGCTTATAAAGGTTTAGTGTGGTCTC	2734	Golgi apparatus protein 1 isoform 1 precursor	7.57924	6.28445
ASHGA5P028597	0.00359566	0.0329783	2.45221	up	protein_coding	NM_001071775	CCDS31990.1	MZT1	RefSeq	2412	chr13	-	73282494	73301938	AACCCAGAAGCTTTATCATCGGTTATTAAGGAGCTTCGCAAGGCTACTGAAGCACTGAAG	440145	mitotic-spindle organizing protein 1	5.00981	3.71572
ASHGA5P050586	0.0136227	0.05182	2.45147	up	protein_coding	NM_025244	CCDS2037.1	TSGA10	RefSeq	3685	chr2	-	99613723	99771187	TGACACCTGAAATGATTCTTCACATCCCTGAGAAAGGTCAAAGTTACAAACTGATTTTTT	80705	testis-specific gene 10 protein	4.15051	2.85686
ASHGA5P045103	0.00757299	0.0382221	2.44702	up	protein_coding	ENST00000382387	CCDS6439.1	C9orf66	GENCODE	2786	chr9	-	213107	215893	GCATATAAGACAAAGTTCACTGCATAGACTACAATAGACTACATACGAAAACAAACCCAA	157983	chromosome 9 open reading frame 66 [Source:HGNC Symbol;Acc:26436]	4.89019	3.59916
ASHGA5P013661	0.00459404	0.0338147	2.44556	up	protein_coding	NM_001012456	CCDS5513.1	SEC61G	RefSeq	480	chr7	-	54819939	54826939	TGTCGGTTGGGCAGTCATGGATCAGGTAATGCAGTTTGTTGAGCCAAGTCGGCAGTTTGT	23480	protein transport protein Sec61 subunit gamma	6.84557	5.55541
ASHGA5P013080	0.0405493	0.102276	2.44454	up	protein_coding	NM_001003793	CCDS33724.1	RBMS3	RefSeq	8234	chr3	+	29322802	30051886	AGGATTATGATACTCCACCAGCTGTTGTGTCAGTATATGACTGCTGCTGCTCCTATGCAA	27303	"RNA-binding motif, single-stranded-interacting protein 3 isoform 1"	6.21906	4.9295
ASHGA5P035333	0.019718	0.0637673	2.44303	up	protein_coding	ENST00000409817	CCDS33295.1	CXCR4	GENCODE	1895	chr2	-	136871918	136873813	TAACTGGGTTAATGCTTGCTGAATTGGAAGTGAATGTCCATTCCTTTGCCTCTTTTGCAG	7852	chemokine (C-X-C motif) receptor 4 [Source:HGNC Symbol;Acc:2561]	5.12053	3.83185
ASHGA5P053149	0.0161159	0.056566	2.44246	up	protein_coding	NM_032936	CCDS5593.1	TMEM60	RefSeq	882	chr7	-	77423044	77427747	AACTGTTTAAATGAGAATGTCCTTGGCTCAGAGAGTACTACTCACCTGGCTTTTCACACT	85025	transmembrane protein 60	7.73114	6.4428
ASHGA5P032289	0.00816124	0.0396275	2.44032	up	protein_coding	NM_022731	CCDS30987.1	NUCKS1	RefSeq	6471	chr1	-	205681946	205719372	TAAAGCAGCTTCTAAACAGAGAGAGATGCTCATGGAAGATGTGGGCAGTGAGGAAGAACA	64710	nuclear ubiquitous casein and cyclin-dependent kinase substrate 1	6.36516	5.0781
ASHGA5P006957	0.010192	0.0442942	2.4374	up	protein_coding	NM_024339	CCDS10491.1	THOC6	RefSeq	1444	chr16	+	3074031	3077756	ACGTCACCTTCTACCAGGACCTGATTCTGTCAGCTGGCCAGGGCCGCTGCGTCAACCAGT	79228	THO complex subunit 6 homolog isoform 1	4.5648	3.27946
ASHGA5P014548	0.00630952	0.0354179	2.43676	up	protein_coding	NM_012322	CCDS5438.1	LSM5	RefSeq	2275	chr7	-	32524944	32530023	CTGCCCTTAGAGCTTGTGGACAAATGTATAGGATCAAGAATTCACATCGTGATGAAGAGT	23658	U6 snRNA-associated Sm-like protein LSm5 isoform a	5.85318	4.56821
ASHGA5P055021	0.000660608	0.0233011	2.43662	up	protein_coding	NM_006645	CCDS41688.1	STARD10	RefSeq	1988	chr11	-	72465773	72504750	ACCTGAGCGCCGCACCGCTTCAGGGACGGAGACAGGACCGGGCGAGCCCTGGGGCGGCGG	10809	PCTP-like protein	4.6557	3.37082
ASHGA5P003204	0.00806044	0.0393926	2.43635	up	protein_coding	ENST00000378823	CCDS34233.1	RAD50	GENCODE	6597	chr5	+	131892615	131980313	CTCTGGTTGAGATAATAAAAAGTCGCTCACAGCAGCGTAACTTCCAGCTTCTGGTAATCA	10111	RAD50 homolog (S. cerevisiae) [Source:HGNC Symbol;Acc:9816]	5.34823	4.06351
ASHGA5P035760	0.00767499	0.0384959	2.43463	up	protein_coding	NM_016131	CCDS1720.1	RAB10	RefSeq	3785	chr2	+	26256728	26360323	CCTGCGTCCTTTTTCGTTTTTCGGATGATGCCTTCAATACTACCTTTATTTCCACCATAG	10890	ras-related protein Rab-10	6.05637	4.77267
ASHGA5P035643	0.0213627	0.067271	2.43375	up	protein_coding	ENST00000408934	CCDS33417.1	PRR21	GENCODE	1170	chr2	-	240981229	240982399	AGGGCCACCTTCAACACCTGTCTTCTTGTTTCTAACATGTACTTTCTAATAATCTCTTAC	643905	proline rich 21 [Source:HGNC Symbol;Acc:33866]	5.31865	4.03547
ASHGA5P033535	0.00707366	0.0370295	2.43348	up	protein_coding	NM_001821	CCDS31073.1	CHML	RefSeq	7082	chr1	-	241792166	241799232	CCAACGATTGGAAATGGTTAAGTAAATTTTGGTGTATTGCTAGTGCTATCACAGAATGTT	1122	rab proteins geranylgeranyltransferase component A 2	6.67302	5.39
ASHGA5P007231	0.0221503	0.0688572	2.43275	up	protein_coding	NM_004695	CCDS11713.1	SLC16A5	RefSeq	1940	chr17	+	73084054	73102248	CTGAGATCATGTGCCAGTCTTCCCGCCAGCCACGTCCAGCTGGCGTCAATAAGCATCTTT	9121	monocarboxylate transporter 6	5.94619	4.66359
ASHGA5P002576	0.00647303	0.0355643	2.43022	up	protein_coding	NM_004664	CCDS9021.1	LIN7A	RefSeq	1235	chr12	-	81191170	81331694	CATGTCATAGGCCCTTGAGGGAAAGCTACTTGATCAAACATCCGATAGTCACAAATTTGA	8825	protein lin-7 homolog A	6.47144	5.19035
ASHGA5P045432	0.00627064	0.0353305	2.42993	up	protein_coding	NM_001009936	CCDS35117.1	PHF19	RefSeq	1001	chr9	-	123631852	123639606	TCCCATCACAGAGTCTGAGCTCCAAGCAGAAGGGCCACACCTGGGCTTTGGAGACAGATA	26147	PHD finger protein 19 isoform b	6.00164	4.72072
ASHGA5P001918	0.022906	0.0702419	2.42943	up	protein_coding	ENST00000249075	CCDS13872.1	LIF	GENCODE	3969	chr22	-	30636435	30642840	AATGAAGGTCTTGGCGGCAGGAGTTGTGCCCCTGCTGTTGGTTCTGCACTGGAAACATGG	3976	leukemia inhibitory factor [Source:HGNC Symbol;Acc:6596]	8.16128	6.88066
ASHGA5P004463	0.00568598	0.0345083	2.42472	up	protein_coding	NM_006234	CCDS5724.1	POLR2J	RefSeq	991	chr7	-	102113547	102119381	CCCTGCTGGAGGAGCGCTTTCGGGTGGCCATAAAAGACAAGCAGGAAGGAATTGAGTAGG	5439	DNA-directed RNA polymerase II subunit RPB11-a	5.33185	4.05403
ASHGA5P021522	0.00697283	0.036818	2.42394	up	protein_coding	NM_206940	CCDS7986.1	MS4A7	RefSeq	2841	chr11	+	60145957	60163426	CTCCCCAGAGCATCATCAGCATCATGCTATTACAATCCCAAACCATGGGGGTTTCTCACA	58475	membrane-spanning 4-domains subfamily A member 7 isoform 2	6.88555	5.6082
ASHGA5P036064	0.0154424	0.0552358	2.42317	up	protein_coding	NM_001205288	CCDS54387.1	LIMS3L	RefSeq	1221	chr2	+	110656008	110664033	GTTCTCCAGAAAAGAAAGCTTGGAAACTTACCCAGTTTGCCTTCCATTTGGGACATGACT	100288695	LIM and senescent cell antigen-like-containing domain protein 3-like	6.53027	5.25338
ASHGA5P011748	0.00537405	0.0342414	2.42184	up	protein_coding	NM_021129	CCDS7299.1	PPA1	RefSeq	1316	chr10	-	71962585	71993190	CCAACAGACGTGGATAAGTGGTTCCATCACCAGAAAAACTAATGAGATTTCTCTGGAATA	5464	inorganic pyrophosphatase	7.73214	6.45603
ASHGA5P036974	0.00843109	0.0401166	2.41934	up	protein_coding	NM_018474		PLK1S1	RefSeq	2329	chr20	+	21106623	21227258	CGTGTCCAAGCTCATGTTGTACACTTCACCACAAATACAGAGAAGCTTCAAAAACTGAAG	55857	centrosomal protein kizuna isoform 1	4.9449	3.67029
ASHGA5P007567	0.00233402	0.0309612	2.4188	up	protein_coding	NM_001130725	CCDS45083.1	PSMB5	RefSeq	958	chr14	-	23495059	23504429	ATGATCTGTGGCTGGGATAAGAGAGGCCCTGGCCTCTACTACGTGGACAGTGAAGGGAAC	5693	proteasome subunit beta type-5 isoform 2	5.42244	4.14815
ASHGA5P007361	0.0150405	0.0544096	2.41864	up	protein_coding	NM_003364	CCDS5507.1	UPP1	RefSeq	1796	chr7	+	48128745	48148330	ATCATCCGCATTGGCACTTCTGGTGGGATAGGTCTGGAGCCCGGCACTGTGGTCATAACA	7378	uridine phosphorylase 1	5.07146	3.79727
ASHGA5P009229	0.0337631	0.0904287	2.4089	up	protein_coding	NM_020194	CCDS2465.1	MFF	RefSeq	2032	chr2	+	228192227	228222549	AAATAAAATTTCAAGGTTCCAGGCACCGATTTCTGCACCGGAGTACACTGTGACACCATC	56947	mitochondrial fission factor	5.65219	4.38382
ASHGA5P019637	0.0112307	0.0468307	2.40607	up	protein_coding	NM_178190	CCDS320.1	ATPIF1	RefSeq	636	chr1	+	28562601	28564616	GATATTTCCGACATTACAGGTTATGCTTTGAGATCTCTTTGGGGTGAAGGATTGAAATTA	93974	"ATPase inhibitor, mitochondrial isoform 2 precursor"	5.59413	4.32745
ASHGA5P015458	0.00287896	0.0318783	2.40604	up	protein_coding	NM_006134	CCDS13625.1	TMEM50B	RefSeq	2385	chr21	-	34821447	34852316	GGAAGAACAGGTGCTCGAGTTTGGCTTTTCATTGGTTTCATGTTGATGTTTGGGTCACTT	757	transmembrane protein 50B	5.54945	4.28279
ASHGA5P006108	0.0192104	0.0627836	2.4058	up	protein_coding	NM_031370	CCDS3592.1	HNRNPD	RefSeq	2257	chr4	-	83274466	83295149	AGAGGTGGTGGCCCCAGTCAAAACTGGAACCAGGGATATAGTAACTATTGGAATCAAGGC	3184	heterogeneous nuclear ribonucleoprotein D0 isoform a	5.07039	3.80387
ASHGA5P048733	0.00715052	0.0372786	2.40469	up	protein_coding	NM_171846	CCDS45275.1	LACTB	RefSeq	1421	chr15	+	63413998	63422026	ATAGAGCAAGGTAAATGAATACCTTCTGCTGTGTCTAGCTATATCGCATCTTAACACTAT	114294	"serine beta-lactamase-like protein LACTB, mitochondrial isoform b"	4.63172	3.36587
ASHGA5P010631	0.00387744	0.0329783	2.40457	up	protein_coding	NM_014812	CCDS44339.1	CEP170	RefSeq	7204	chr1	-	243287729	243418708	CCAAGCTGTTACTAGCTCTGCGCATCACAGAGGGGGGCATGGTGTTCCACATGGGAAATT	9859	centrosomal protein of 170 kDa isoform alpha	5.82653	4.56075
ASHGA5P010449	0.00997402	0.0439346	2.40221	up	protein_coding	NM_017520	CCDS9287.1	MPHOSPH8	RefSeq	4281	chr13	+	20207787	20247599	TGTTTTTCTGGACAGTCATTTTGTTTACTCATTCAGCCCTGTTGCAGGTCCCAATAAACT	54737	M-phase phosphoprotein 8	4.99239	3.72803
ASHGA5P009866	0.0108462	0.0459992	2.40119	up	protein_coding	NM_014044	CCDS2035.1	UNC50	RefSeq	1167	chr2	+	99225041	99234977	AGGACTCCAGGAAGATGTTACCGAGTACTTCAGTGAATTCCTTAGTGCAGGGGAACGGAG	25972	protein unc-50 homolog	5.41108	4.14733
ASHGA5P000845	0.0174196	0.0591787	2.39643	up	protein_coding	NM_002286	CCDS8561.1	LAG3	RefSeq	1995	chr12	+	6881669	6887621	GAGAAGACAGTGGCGACCAAGACGATTTTCTGCCTTAGAGCAAGGGATTCACCCTCCGCA	3902	lymphocyte activation gene 3 protein precursor	5.79877	4.53789
ASHGA5P005928	0.00413299	0.0330909	2.39343	up	protein_coding	ENST00000311469	CCDS47090.2	COQ2	GENCODE	1641	chr4	-	84184976	84206067	GACTCACCAGATTTACACTCTAGACATCCACAGACCTGAGGATTGTTGGAATAAATTTAT	27235	"coenzyme Q2 homolog, prenyltransferase (yeast) [Source:HGNC Symbol;Acc:25223]"	5.47451	4.21543
ASHGA5P055022	0.0311094	0.0856287	2.39162	up	protein_coding	NM_176072	CCDS8219.1	P2RY2	RefSeq	2681	chr11	+	72929343	72947395	TTCCCTGCAGGGCGATGGCAGCAGACCTGGGCCCCTGGAATGACACCATCAATGGCACCT	5029	P2Y purinoceptor 2	4.49312	3.23513
ASHGA5P002129	0.0155187	0.0554504	2.38816	up	protein_coding	NM_006067	CCDS10954.1	EMC8	RefSeq	1964	chr16	-	85812230	85833148	ATGAGAACAGATGGCGGTGCAGAGACCCACACCATGACTACTGTGAAGACTGGCCAGAGG	10328	ER membrane protein complex subunit 8 isoform 1	4.84403	3.58813
ASHGA5P006713	0.00437775	0.0334484	2.38605	up	protein_coding	NM_003461	CCDS5883.1	ZYX	RefSeq	2325	chr7	+	143078359	143088206	TACAAGTGTGAGGACTGCGGGAAGCCCCTGTCGATTGAGGCAGATGACAATGGCTGCTTC	7791	zyxin	6.24376	4.98914
ASHGA5P003775	0.00379684	0.0329783	2.38578	up	protein_coding	NM_183421	CCDS5953.1	FBXO25	RefSeq	2529	chr8	+	356807	419875	TTACTATTCAAGGACTCAGGACACCCCTGCACGGCGGCCGACCCTGACAGCTGCTTCACG	26260	F-box only protein 25 isoform 1	8.39806	7.1436
ASHGA5P009484	0.00730941	0.0376446	2.38559	up	protein_coding	NM_004763	CCDS1662.1	ITGB1BP1	RefSeq	1930	chr2	-	9545814	9563643	TATCAGTGCAACAGCCTGGAACAAGCACAAGCCATTTGCAAGGTTTTATCCACCGCTTTT	9270	integrin beta-1-binding protein 1 isoform 1	7.56219	6.30784
ASHGA5P052586	0.00188974	0.0290776	2.38558	up	protein_coding	NM_016614	CCDS4557.1	TDP2	RefSeq	1940	chr6	-	24650204	24667115	AGTATACATGGGATACACAAATGAACTCTAATCTTGGAATAACTGCTGCTTGTAAACTTC	51567	tyrosyl-DNA phosphodiesterase 2	4.48777	3.23343
ASHGA5P042413	0.0126037	0.0496689	2.38521	up	protein_coding	NM_003017	CCDS4823.1	SRSF3	RefSeq	3144	chr6	+	36562089	36572244	AGGAAATAGAAGACAGTTTGCAAGAGAAGTGGTGTACAGGAAATTACTTCATTTGACAGG	6428	serine/arginine-rich splicing factor 3	6.79558	5.54147
ASHGA5P039567	0.00215098	0.0306219	2.38422	up	protein_coding	NM_001001701	CCDS43266.1	C4orf3	RefSeq	2854	chr4	-	120217573	120221968	CCTCTGGCTTTTCATCCTTTTCGATGTGGTGGTGTTTCTCTTTGTGTATTTTTTGCCATG	401152	uncharacterized protein C4orf3 isoform 2	8.72726	7.47374
ASHGA5P004911	0.00132676	0.0270465	2.38355	up	protein_coding	NM_174927	CCDS8493.1	SPATA19	RefSeq	866	chr11	-	133710516	133715392	AGAGCAACAGATGGAGCTTTGGGAACGCGGAGAACAGTGGGGTTACAGGGAGTCATCATC	219938	"spermatogenesis-associated protein 19, mitochondrial precursor"	4.32936	3.07625
ASHGA5P013366	0.0100318	0.0439495	2.38203	up	protein_coding	NM_145249	CCDS9919.1	IFI27L1	RefSeq	732	chr14	+	94547638	94569060	TGCAGTCAGTGGGGGCAGCTGGACTCTCTGTGACATCTAAAGTTATCGGGGGCTTTGCTG	122509	interferon alpha-inducible protein 27-like protein 1	8.35058	7.09839
ASHGA5P005304	0.027023	0.0780917	2.37785	up	protein_coding	NM_001011668	CCDS34895.1	CHCHD7	RefSeq	1723	chr8	+	57124314	57131176	ATGTTACCTAGTAAGAAGACTGTTAGAATGCCCTCGGTAACACAGAGGCTGAGAGATCCT	79145	coiled-coil-helix-coiled-coil-helix domain-containing protein 7 isoform b	5.94036	4.6907
ASHGA5P054669	0.00551123	0.0343796	2.37481	up	protein_coding	NM_005170	CCDS7732.1	ASCL2	RefSeq	1864	chr11	-	2289727	2292182	TGCAGGCGCGATGGACGGCGGCACACTGCCCAGGTCCGCGCCCCCTGCGCCCCCCGTCCC	430	achaete-scute homolog 2	8.98763	7.73982
ASHGA5P006101	0.000763295	0.023569	2.37397	up	protein_coding	NM_018114	CCDS2783.1	DALRD3	RefSeq	2242	chr3	-	49052434	49058467	ACATGATGAGGGTGAGTGGTTGTTGCTCTTCAACAGTATCCTCCCCTTTCCGGATCTGCT	55152	DALR anticodon-binding domain-containing protein 3 isoform 2	7.12182	5.87451
ASHGA5P049179	0.0028627	0.0318783	2.37367	up	protein_coding	NM_182958	CCDS45468.1	KAT8	RefSeq	1840	chr16	+	31128984	31142714	TCAAAAGTGCCCAGTATAAGAAACCACCCATCACAGGTGGGTGGGGGGCTGCTGTGTGTC	84148	histone acetyltransferase KAT8 isoform 2	7.89027	6.64315
ASHGA5P009867	0.000106321	0.0145843	2.36842	up	protein_coding	ENST00000357774	CCDS46031.1	ZNF98	GENCODE	2260	chr19	-	22573898	22605148	GAACCCCCAGTTGTATATTCTTATTTTGCCCAAGACCTTTGGCCAAAGCAGGGCAAAAAA	148198	zinc finger protein 98 [Source:HGNC Symbol;Acc:13174]	11.713	10.4691
ASHGA5P004810	0.0126845	0.049858	2.365	up	protein_coding	NM_015420	CCDS34934.1	DCAF13	RefSeq	2657	chr8	+	104426941	104455680	ATTGGGTGTGCTTACATCACGAGAAAAAGCAGCCAAGGATTATAACCAGAAATTGAAGGA	25879	DDB1- and CUL4-associated factor 13	6.63998	5.39813
ASHGA5P048456	0.0106561	0.0455995	2.36472	up	protein_coding	NM_019021	CCDS8369.2	C11orf71	RefSeq	680	chr11	-	114262169	114271139	TTACTACCTGGACCCTGAAGCTATCTGAGTCTGCAACCCCTGATTTAAGATGGTGTTCAA	54494	uncharacterized protein C11orf71	8.40248	7.16081
ASHGA5P053938	0.0128784	0.05025	2.36188	up	protein_coding	NM_005391	CCDS14212.1	PDK3	RefSeq	1803	chrX	+	24483343	24552542	CCAGGGATGCTTCAAAATACAAAGCAAAACAGTAATATACCACCTTGATTTCCATTACAA	5165	"pyruvate dehydrogenase kinase, isozyme 3 isoform 2"	5.67355	4.43361
ASHGA5P051710	0.00509902	0.0338278	2.36157	up	protein_coding	NM_001184723	CCDS3142.1	TM4SF18	RefSeq	3676	chr3	-	149036284	149051259	AGACTTTCTGTGACTGTATACTCTTGAAATCTCCCGCAGGTTCTAAGCAGGGCAAAATGG	116441	transmembrane 4 L6 family member 18	9.29074	8.05099
ASHGA5P012904	0.0207622	0.0660953	2.36129	up	protein_coding	NM_001105538	CCDS42238.1	MYBBP1A	RefSeq	4122	chr17	-	4442190	4458681	TCAGAGTGGGGCCAAGAAGAAAGCACAGACTCTGAGATTCACAATCAGCAGCTCTAAAAA	10514	myb-binding protein 1A isoform 1	5.91987	4.68029
ASHGA5P012632	0.0041027	0.0330909	2.3595	up	protein_coding	NM_012311	CCDS7080.1	KIN	RefSeq	6401	chr10	-	7792924	7829990	CATTGAAACTGGCCCTTTAAAAGGACGCAGAGTTGAAGGAATTCAATATGAAGACATTTC	22944	DNA/RNA-binding protein KIN17	5.52878	4.2903
ASHGA5P005423	0.0402589	0.101842	2.35591	up	protein_coding	NM_001076675	CCDS42535.1	ZNF626	RefSeq	6088	chr19	-	20802744	20844402	AAACCCTCAGTAATGTGTTCTCATTTTGCCCAAGACCTTTGGCCAGAGCAGAGCATGAAA	199777	zinc finger protein 626 isoform 1	6.83902	5.60273
ASHGA5P049371	0.00922775	0.0420596	2.3524	up	protein_coding	NM_000485	CCDS32511.1	APRT	RefSeq	807	chr16	-	88875876	88878342	CTTAAGGGCAGGGAGAAGCTGGCACCTGTACCCTTCTTCTCTCTCCTGCAGTATGAGTGA	353	adenine phosphoribosyltransferase isoform a	9.71279	8.47866
ASHGA5P010244	0.00337379	0.032685	2.35207	up	protein_coding	NM_013448	CCDS9651.1	BAZ1A	RefSeq	6031	chr14	-	35221936	35344853	GACACCAAAGATTTAACAGAGGCTTTGGATGAAGATGCAGACCCCACAAAATCTGCACTG	11177	bromodomain adjacent to zinc finger domain protein 1A isoform a	4.49543	3.2615
ASHGA5P002344	0.00942788	0.0425098	2.34828	up	protein_coding	NM_181837	CCDS5012.1	ORC3	RefSeq	2589	chr6	+	88299784	88377172	TATCAGTTGATATGGCAGCAGATGAAATCTGAAAATGAGCGACTACAAGAGGAATTAAAT	23595	origin recognition complex subunit 3 isoform 1	4.88899	3.65738
ASHGA5P006786	0.0158293	0.0561465	2.34805	up	protein_coding	NM_005839	CCDS255.1	SRRM1	RefSeq	3952	chr1	+	24969593	24999772	TCAGGTAAAGTGACAAAACATAAAGGTACTGAGAAAAGAGAATCCCCTTCACCAGCACCG	10250	serine/arginine repetitive matrix protein 1	7.12908	5.89761
ASHGA5P054228	0.0320662	0.0871371	2.34761	up	protein_coding	ENST00000382832	CCDS14793.1	CYorf15B	GENCODE	3315	chrY	+	21758441	21767698	CAGGATCTCCTCTAGGCATTGATTAAGATTAAGTGTGATCATTGTACTGATGGATATATT		Putative gamma-taxilin-like protein CYorf15B [Source:UniProtKB/Swiss-Prot;Acc:Q9BZA4]	5.76716	4.53597
ASHGA5P001776	0.00481824	0.0338278	2.3466	up	protein_coding	NM_018447	CCDS2594.1	EMC3	RefSeq	1107	chr3	-	10005635	10028522	AGCTTTCAAGACAGAGTGGGAAGCTTTGGAGCTGACGGATCACCAGTGGGCACTAGATGA	55831	ER membrane protein complex subunit 3	6.94785	5.71728
ASHGA5P003646	0.0125328	0.0495937	2.34602	up	protein_coding	NM_032977	CCDS2340.1	CASP10	RefSeq	5906	chr2	+	202047620	202086383	TCTGCTAACACTCTAAACTCTGAAACCAGCACAAAGAGGGCAGCTGTGTACAGGATGAAT	843	caspase-10 isoform 1 preproprotein	5.60361	4.3734
ASHGA5P001923	0.0119062	0.0481304	2.34279	up	protein_coding	NM_003378	CCDS5712.1	VGF	RefSeq	2586	chr7	-	100805789	100808852	ACACCAGCTGTCTCCGGCAGCCTCTTGGTCATGAAAGCCCTCAGATTGTCGGCTTCCGCC	7425	neurosecretory protein VGF precursor	6.09764	4.86941
ASHGA5P041678	0.0072924	0.037576	2.34211	up	protein_coding	ENST00000340650	CCDS4542.1	NHLRC1	GENCODE	2134	chr6	-	18120717	18122851	GAAAAAGGATTTTGTGGTGGCCATCACTTTCATTCAATTTGCGACTGCTCTGATGGCACA	378884	NHL repeat containing 1 [Source:HGNC Symbol;Acc:21576]	4.9512	3.72339
ASHGA5P013817	0.0333267	0.0897196	2.34167	up	protein_coding	ENST00000396857	CCDS42564.1	MAP4K1	GENCODE	2681	chr19	-	39078280	39108643	ACTTTCCGTCTGCTTGGCTCCCCCAGGCCTGTAGTGGTGGAGACACGCCCAGTGGATGAT	11184	mitogen-activated protein kinase kinase kinase kinase 1 [Source:HGNC Symbol;Acc:6863]	9.11854	7.891
ASHGA5P009045	0.0022043	0.0308874	2.33814	up	protein_coding	NM_018956	CCDS6955.1	C9orf9	RefSeq	726	chr9	+	135754289	135765418	GCTGCAGCACGGGACGACTTAGCTTCTGTATTATTGTTGCTTCCTCAGGGGGAGACAGTC	11092	uncharacterized protein C9orf9	8.83847	7.61311
ASHGA5P003911	0.0294785	0.0824766	2.33631	up	protein_coding	NM_015054	CCDS31882.1	UHRF1BP1L	RefSeq	5195	chr12	-	100430862	100536642	ACACTTAAATCACAGTCATCTTTAAGTGGAAAGCCTAAGGAACGTTGCCCACCCAACCTG	23074	UHRF1-binding protein 1-like isoform a	4.74497	3.52074
ASHGA5P051753	0.00530552	0.0340831	2.33405	up	protein_coding	NM_015938	CCDS3194.1	NMD3	RefSeq	2758	chr3	+	160939098	160969795	GGTGAAGAAGGTGCATCAATGCTGACATAATGAGATGTTGTAGACTGTTTCCATACATGG	51068	60S ribosomal export protein NMD3	4.31008	3.08724
ASHGA5P008364	0.0107671	0.0457973	2.3331	up	protein_coding	NM_001172304	CCDS53503.1	MASTL	RefSeq	3509	chr10	+	27443752	27475848	AGGGCCCATGATATCCCTTGGCCAGAAGGTGAAGAAAAGTTATCTGATAATGCTCAAAGT	84930	serine/threonine-protein kinase greatwall isoform 3	9.00623	7.78399
ASHGA5P004599	0.0123082	0.0491122	2.33292	up	protein_coding	NM_212552	CCDS33225.1	BOLA3	RefSeq	554	chr2	-	74362527	74375039	GATCCGCGGGCTTCCACTTCACCATCGGATGTTTGCCACTCAGACTGAGGGGGAGCTCAG	388962	bolA-like protein 3 isoform 1	8.0136	6.79146
ASHGA5P002985	0.0366756	0.0957495	2.33175	up	protein_coding	NM_006433	CCDS1984.1	GNLY	RefSeq	751	chr2	+	85921413	85925875	GGCAACCCAGGTCTGGTCTTCTCTCGTCTGAGCCCTGAGTACTACGACCTGGCAAGAGCC	10578	granulysin isoform NKG5 precursor	7.79031	6.5689
ASHGA5P014623	0.00310528	0.0323215	2.32989	up	protein_coding	NM_002121	CCDS4765.1	HLA-DPB1	RefSeq	4055	chr6	+	33043702	33057473	GAGTGGGCATCTTCATGCACAGGAGGAGCAAGAAAGTTCAACGAGGATCTGCATAAACAG	3115	"HLA class II histocompatibility antigen, DP beta 1 chain precursor"	8.51147	7.29121
ASHGA5P001596	0.000251236	0.0185551	2.32854	up	protein_coding	NM_201543	CCDS1612.1	LGALS8	RefSeq	6155	chr1	+	236686738	236716279	AAAGTCTGGCACGCCCCAGCTTAGGCTGCCATTCGCTGCAAGGTTGAACACCCCCATGGG	3964	galectin-8 isoform b	8.55118	7.33175
ASHGA5P011386	0.00497954	0.0338278	2.32681	up	protein_coding	NM_002351	CCDS14608.1	SH2D1A	RefSeq	2523	chrX	+	123480131	123507010	AAGTCCTCAGCTAGAAGTACACAAGGTACTACAGGGATAAGAGAAGATCCTGATGTCTGC	4068	SH2 domain-containing protein 1A isoform 1	4.90734	3.68899
ASHGA5P052450	0.0112457	0.046874	2.32348	up	protein_coding	NM_181676	CCDS4283.1	PPP2R2B	RefSeq	2182	chr5	-	145969067	146435700	CCAGGACAAGGTTAACTAGGTGGACAAGTTATTACTTAATAATCTCACATACTGAATACT	5521	serine/threonine-protein phosphatase 2A 55 kDa regulatory subunit B beta isoform isoform b	5.58422	4.36794
ASHGA5P042316	0.0132986	0.0512574	2.32292	up	protein_coding	ENST00000244623	CCDS4642.1	OR2B6	GENCODE	942	chr6	+	27925018	27925960	CAAGGAGGTAAAGGAAGGCTTTAAAAGGTTGGTTGCAAGAGTCTTCTTAATCAAGAAATA	26212	"olfactory receptor, family 2, subfamily B, member 6 [Source:HGNC Symbol;Acc:8241]"	5.06879	3.85285
ASHGA5P005235	0.0213317	0.0671943	2.31791	up	protein_coding	NM_139178	CCDS7906.1	ALKBH3	RefSeq	1585	chr11	+	43902356	43941825	GAACTTCCTTACACTTATTCAAGAATCACTATGGAACCAAATCCTCACTGGCACCCTGTG	221120	alpha-ketoglutarate-dependent dioxygenase alkB homolog 3	7.3257	6.11288
ASHGA5P005706	0.00309765	0.0323215	2.31211	up	protein_coding	NM_175614	CCDS12155.1	NDUFA11	RefSeq	810	chr19	-	5894680	5904024	GGAGCACGCACGCACAACTACGGGATTGGCGCCGCCGCCTGCGTGTACTTTGGCATAGCG	126328	NADH dehydrogenase [ubiquinone] 1 alpha subcomplex subunit 11 isoform 1	9.94968	8.74047
ASHGA5P037076	0.0452521	0.110072	2.30772	up	protein_coding	NM_033542	CCDS13351.1	SYS1	RefSeq	2802	chr20	+	43991739	43997862	TAGAATCAGGCCCTTTGGACATCCTGCTGACACTTGGGCCCCTTAACACCTTGGGCTGCT	90196	protein SYS1 homolog isoform a	7.00849	5.80202
ASHGA5P050088	0.00158459	0.0280187	2.30603	up	protein_coding	ENST00000393733	CCDS42499.1	MRPL4	GENCODE	2404	chr19	+	10362639	10370736	TTAAGACCTTCAACTTGATCCCGGCTGTTGGTGAGCAAAGAGCCCAGGCCCCTAGAGTGC	51073	mitochondrial ribosomal protein L4 [Source:HGNC Symbol;Acc:14276]	5.29871	4.0933
ASHGA5P051701	0.00333309	0.032685	2.30467	up	protein_coding	NM_021105	CCDS3135.1	PLSCR1	RefSeq	2228	chr3	-	146232966	146262628	GAACAAAAATCAGGAGTGTGGTAGTGGATTAGTGAAAGTCTCCTCAGGAAATCTGAAGTC	5359	phospholipid scramblase 1	6.51493	5.31037
ASHGA5P055396	0.00533532	0.03414	2.30364	up	protein_coding	NM_213566	CCDS119.1	DFFA	RefSeq	3408	chr1	-	10520602	10532613	TCTAGTCAGGATTTGGAGGTGGGCGGAAACCAGGGTCACTGAGCTACAGAGGAGGACATG	1676	DNA fragmentation factor subunit alpha isoform 2	4.77449	3.57057
ASHGA5P050465	0.00904289	0.0416146	2.30264	up	protein_coding	ENST00000306448	CCDS1826.1	ATP6V1E2	GENCODE	1979	chr2	-	46738985	46747096	CTTTATATAAGCCTCTGGGAAGTGAAGCTAGTGTTGAACCACTAAACCATAAAAGTTTAA	90423	"ATPase, H+ transporting, lysosomal 31kDa, V1 subunit E2 [Source:HGNC Symbol;Acc:18125]"	5.44958	4.24629
ASHGA5P039721	0.00660066	0.0359385	2.30194	up	protein_coding	NM_001688	CCDS836.1	ATP5F1	RefSeq	2116	chr1	+	111991742	112004525	GAAGGCTCAAGCACAGCCAGTTATGTAAATGTATCTATCCCAATTGAGACAGCTAGAAAC	515	"ATP synthase subunit b, mitochondrial precursor"	7.88907	6.68622
ASHGA5P002166	0.000351464	0.0194585	2.30072	up	protein_coding	NM_018477	CCDS32090.1	ACTR10	RefSeq	2451	chr14	+	58666832	58702353	AAAGCCTGGTGTTACCCATATATGAAGGAATCCCAGTTCTAAATTGTTGGGGAGCACTAC	55860	actin-related protein 10	4.87731	3.67523
ASHGA5P033062	0.00790513	0.039073	2.29689	up	protein_coding	NM_002984	CCDS11308.1	CCL4	RefSeq	667	chr17	+	34431219	34433014	CACTGTTTCTCTGCTGTTGCAAATACATGGATAACACATTTGATTCTGTGTGTTTTCATA	6351	C-C motif chemokine 4 isoform 1 precursor	9.53899	8.3393
ASHGA5P009482	0.0064009	0.035479	2.29524	up	protein_coding	NM_001011671	CCDS34896.1	CHCHD7	RefSeq	1575	chr8	+	57124314	57131176	GAGGCCGGAGTAAGAAGACTGTTAGAATGCCCTCGGTAACACAGAGGCTGAGAGATCCTG	79145	coiled-coil-helix-coiled-coil-helix domain-containing protein 7 isoform f	6.3761	5.17746
ASHGA5P055475	0.00412558	0.0330909	2.29143	up	protein_coding	NM_004077	CCDS8913.1	CS	RefSeq	2997	chr12	-	56665482	56694175	CTCTAGAAAGGCCCAAGTCCATGAGCACAGAGGGTCTGATGAAGTTTGTGGACTCTAAGT	1431	"citrate synthase, mitochondrial precursor"	5.12099	3.92474
ASHGA5P010194	0.0216854	0.0678468	2.28976	up	protein_coding	NM_018837	CCDS13408.1	SULF2	RefSeq	3909	chr20	-	46286149	46414808	CCCCCGGACTCGAAACATGGACCTGGGACTTAAAGATGGAGGAAGCTATGAGCAATACAG	55959	extracellular sulfatase Sulf-2 isoform a precursor	6.35439	5.1592
ASHGA5P034437	2.74949e-05	0.0114441	2.28796	up	protein_coding	NM_001031	CCDS45953.1	RPS28	RefSeq	401	chr19	+	8386383	8387280	GACCGCCGCCGCGCCGCCATCATGGACACCAGCCGTGTGCAGCCTATCAAGCTGGCCAGG	6234	40S ribosomal protein S28	12.1961	11.002
ASHGA5P052132	0.0140331	0.0525791	2.28786	up	protein_coding	NM_001130689	CCDS3816.1	HMGB2	RefSeq	1454	chr4	-	174252526	174254920	TCGGCCCCGTCAGGTGGACGCGGATCTGTCAACATGGGTAAAGGAGACCCCAACAAGCCG	3148	high mobility group protein B2	4.61075	3.41676
ASHGA5P051797	0.0075065	0.0380335	2.28757	up	protein_coding	NM_020640	CCDS3240.1	DCUN1D1	RefSeq	3192	chr3	-	182660558	182698326	CAAAAAGTACAACAGTGTAGCACTAAAGGAACCTTCTAGAATGTACATAGTCTGTACAAT	54165	DCN1-like protein 1	5.49035	4.29653
ASHGA5P002046	0.0334125	0.0899032	2.286	up	protein_coding	NM_002488	CCDS4234.1	NDUFA2	RefSeq	726	chr5	-	140024947	140027370	GCCCGCTACGCATTTGGCCAAGAGACGAATGTCCCTTTGAACAACTTCAGTGCTGATCAG	4695	NADH dehydrogenase [ubiquinone] 1 alpha subcomplex subunit 2 isoform 1	8.23524	7.04242
ASHGA5P002525	0.00106273	0.025374	2.28597	up	protein_coding	NM_033505	CCDS46240.1	EPT1	RefSeq	8143	chr2	+	26568953	26618759	AGTACGAGTGGTAAAGCAGCTGAGCAGCCATTTTCAGATTTACCCCTTCTCATTGAGGAA	85465	ethanolaminephosphotransferase 1	4.34803	3.15522
ASHGA5P054154	0.0256077	0.0752208	2.28356	up	protein_coding	NM_006123	CCDS14686.1	IDS	RefSeq	1437	chrX	-	148568661	148586884	GGACAAATACCTGATTTTGAATAAAGCAGCATTCAGTTGAAATAACCCTTTCTGTGGTAA	3423	iduronate 2-sulfatase isoform b precursor	7.7297	6.53842
ASHGA5P007401	0.00580948	0.0347584	2.28268	up	protein_coding	NM_001193485	CCDS54385.1	LIMS1	RefSeq	4689	chr2	+	109271267	109303702	TAACACTCAAGAATAAGTTTGTGGAGTTTGACATGAAGCCAGTCTGTAAGAAGTGCTATG	3987	LIM and senescent cell antigen-like-containing domain protein 1 isoform a	4.42353	3.2328
ASHGA5P004051	0.0108306	0.0459716	2.2826	up	protein_coding	NM_018343	CCDS4089.1	RIOK2	RefSeq	3980	chr5	-	96496570	96519005	AATTCCTCCAGAACTGGTGAAACAGAAGGTGAAACGTCAGTTGACAAAACAGCAAAAATC	55781	serine/threonine-protein kinase RIO2 isoform 1	5.4927	4.30203
ASHGA5P005818	0.0238249	0.0718697	2.27933	up	protein_coding	NM_001178142	CCDS54647.1	TFDP2	RefSeq	9185	chr3	-	141663269	141747507	TCAGTTTCAAATTTAGACCTGACCACTGGTGCCACCTTACCCCAGTCAAGTGTAAACCAA	7029	transcription factor Dp-2 isoform 5	6.47702	5.28841
ASHGA5P015688	0.0233911	0.071045	2.27841	up	protein_coding	NM_032483	CCDS47842.1	PPAPDC1B	RefSeq	880	chr8	-	38122257	38126738	CACTGGCAAGGACCCTTTAAATGGTGAAAATGGGCAGATGAATAGCAATAAGTGGACCTT	84513	phosphatidate phosphatase PPAPDC1B isoform 2	5.76557	4.57755
ASHGA5P051044	0.0057571	0.0346617	2.27748	up	protein_coding	NM_006886	CCDS13476.1	ATP5E	RefSeq	449	chr20	-	57603732	57607422	ATTGCCGGCGTCTTGGCGATTCGGCCCGACGAGCTCCGCTTTCGCTACAGCATGGTGGCC	514	"ATP synthase subunit epsilon, mitochondrial"	7.75023	6.5628
ASHGA5P034008	0.00280665	0.0318783	2.27704	up	protein_coding	NM_005001	CCDS42492.1	NDUFA7	RefSeq	585	chr19	-	8376183	8386280	ATTACTATTGCACTCGCGATGGCCGCCGGGAATCTGTGCCCCCTTCCATCATCATGTCGT	4701	NADH dehydrogenase [ubiquinone] 1 alpha subcomplex subunit 7	10.3623	9.17517
ASHGA5P009978	0.0132056	0.0510145	2.27536	up	protein_coding	NM_002382	CCDS9771.1	MAX	RefSeq	2068	chr14	-	65541844	65569227	ATTGACGACCTCAAGCGGCAGAATGCTCTTCTGGAGCAGCAAGTCCGTGCACTGGAGAAG	4149	protein max isoform a	4.96197	3.77588
ASHGA5P006425	0.00399978	0.0330479	2.27498	up	protein_coding	NM_001035005	CCDS32831.1	C18orf32	RefSeq	1669	chr18	-	47007547	47013644	AAACTTTAAGGGTGCAGACATGAATGGATTACCAACAAAAGGACCAACAGAAATCTGTGA	497661	UPF0729 protein C18orf32	6.52469	5.33884
ASHGA5P012038	0.0247641	0.0735059	2.27415	up	protein_coding	NM_001037811	CCDS35300.1	HSD17B10	RefSeq	936	chrX	-	53458205	53461323	AATAGTGGGCATGACACTGCCCATTGCTCGGGATCTGGCTCCCATAGGTCTGTTTGGCAC	3028	3-hydroxyacyl-CoA dehydrogenase type-2 isoform 2	4.57146	3.38613
ASHGA5P053365	0.0144319	0.0533077	2.27225	up	protein_coding	NM_207336	CCDS5899.1	ZNF467	RefSeq	2295	chr7	-	149461452	149470295	TTCTTCTGAGCCTAGTTCTCACGAGGACCCTTTCTTGCCCACAGTTTCGAGAGGCCCGTG	168544	zinc finger protein 467	5.51587	4.33174
ASHGA5P055547	0.00815353	0.0396275	2.27105	up	protein_coding	NM_001143886	CCDS44948.1	PPP1R12A	RefSeq	5337	chr12	-	80167342	80307691	ATTTGATTAGTTCTAGTGTTCCAAGCACCACATCAACACCAACAGTTACCTCTGCAGCTG	4659	protein phosphatase 1 regulatory subunit 12A isoform b	5.29005	4.10669
ASHGA5P004600	0.0224641	0.0694363	2.27011	up	protein_coding	NM_001035505	CCDS33224.1	BOLA3	RefSeq	465	chr2	-	74362527	74375039	GACATTTCAGGCACTAAAAGAAGAAATCAAAGAGATGCATGGATTGCGGATATTTACCTC	388962	bolA-like protein 3 isoform 2	6.3696	5.18684
ASHGA5P052070	0.00803111	0.0393521	2.26623	up	protein_coding	ENST00000427266	CCDS47132.1	LARP1B	GENCODE	1819	chr4	+	128982502	129043507	AGCCATAAAGGTAATTGTTTCTGGCCAACATCTTTCTACTGATGCTTTGTTTTGATTGTA	55132	"La ribonucleoprotein domain family, member 1B [Source:HGNC Symbol;Acc:24704]"	4.87598	3.69568
ASHGA5P012544	0.0226727	0.0698207	2.26401	up	protein_coding	NM_001135673	CCDS46260.1	ATL2	RefSeq	2967	chr2	-	38522028	38604432	ATGGGAACAGGTATTGAAGCCCCTGGGTGATAATTTGATGGAGGAAAACATAAGGCAGTC	64225	atlastin-2 isoform 2	5.05022	3.87134
ASHGA5P046956	0.043048	0.106698	2.26218	up	protein_coding	NM_004747	CCDS7353.2	DLG5	RefSeq	7493	chr10	-	79550548	79686348	GGAGAAGACGCAGCCTCACCTGCTGCCCATTCTCTACCTGAACGGCGTCGTCGGGCCGCC	9231	disks large homolog 5	5.82832	4.6506
ASHGA5P014016	0.00262563	0.0316911	2.26046	up	protein_coding	NM_001040648	CCDS47600.1	CRCP	RefSeq	2589	chr7	+	65579804	65619553	TCATGGAAGTAGCTGAGAAGCTCCAGCTGCTGAACCACCGGCCTGTGACTGCTGTGGAGA	27297	DNA-directed RNA polymerase III subunit RPC9 isoform c	5.45961	4.28299
ASHGA5P009384	0.00508139	0.0338278	2.25949	up	protein_coding	NM_183013	CCDS7182.1	CREM	RefSeq	2719	chr10	+	35415768	35501886	TAGCATATATCAGACTAGCACGGGGCAATACAATGAGGAAACTGAACTTGCCCCAAGTCA	1390	cAMP-responsive element modulator isoform 19	4.97259	3.79659
ASHGA5P054143	0.0109024	0.0460839	2.2542	up	protein_coding	NM_012317	CCDS14672.1	LDOC1	RefSeq	1388	chrX	-	140269930	140271310	TCCTTCCAGGCCGTTCGCAATGGTGGATGAGTTGGTGCTGCTGCTGCACGCGCTCCTGAT	23641	protein LDOC1	6.32238	5.14976
ASHGA5P017444	0.0128893	0.05025	2.25223	up	protein_coding	NM_001135670	CCDS47798.1	MSRA	RefSeq	1372	chr8	+	9911829	10286401	AGAACAGTCGAACCTTTCCCAGAGGGAACACAGATGGCTGTATTTGAAAAAACTGGCCAT	4482	mitochondrial peptide methionine sulfoxide reductase isoform b	4.34549	3.17413
ASHGA5P048624	0.0235525	0.0713437	2.25133	up	protein_coding	NM_006600	CCDS292.1	NUDC	RefSeq	1813	chr1	+	27248212	27273362	TTTTTCCAAGGCTAAATTCAACTAGCCCCTGTTTTTTCCTCCCTGAACTCTTGGGGCTGA	10726	nuclear migration protein nudC	9.17543	8.00466
ASHGA5P039293	0.0243805	0.072706	2.2509	up	protein_coding	NM_001193318	CCDS54704.1	RNF212	RefSeq	1069	chr4	-	1087095	1107352	GTGACGTGAGGTGGTATTGTAACATTTATGCTCTAATATCAACGTAACATAAATATTGGC	285498	RING finger protein 212 isoform c	5.05168	3.88117
ASHGA5P048607	0.0053902	0.0342414	2.25065	up	protein_coding	NM_020154	CCDS10032.1	EMC7	RefSeq	1075	chr15	-	34376223	34394053	CAAAAGGAGGTAGTCAGGCCGTCCAGAGCTGGCATTTGCACAAACACGGCAACACTGGGT	56851	chromosome 15 open reading frame 24 precursor	6.58394	5.4136
ASHGA5P007447	0.000270657	0.0187505	2.24906	up	protein_coding	ENST00000333050	CCDS10535.1	TMEM186	GENCODE	1448	chr16	-	8889036	8891505	TGGGGCCATGGCTGCCCTTCTCCGAGCTGTGCGTAGGTTTCGGGGAAAAGCTGTGTGGGA	25880	transmembrane protein 186 [Source:HGNC Symbol;Acc:24530]	4.40941	3.24009
ASHGA5P033229	0.00349333	0.0328187	2.24889	up	protein_coding	NM_000269	CCDS11579.1	NME1	RefSeq	811	chr17	+	49230919	49239450	TCAGAACTGGATCTATGAATGACAGGAGGGCAGACCACATTGCTTTTCACATCCATTTCC	4830	nucleoside diphosphate kinase A isoform b	6.33701	5.16779
ASHGA5P007032	0.0353894	0.0933727	2.24889	up	protein_coding	NM_001160266	CCDS54077.1	RPAIN	RefSeq	1474	chr17	+	5322960	5336340	TATGTACAAAGCCTGTGATACTTGGGCTGTGATCCTCTAGAGCCAGCTTGGACTCACATC	84268	RPA-interacting protein isoform e	6.82	5.65079
ASHGA5P050479	0.00410331	0.0330909	2.2478	up	protein_coding	NM_018062	CCDS1860.1	FANCL	RefSeq	1738	chr2	-	58386377	58468515	GTCTGGAAGGAAACACTGAAATAAGAATACAACATTTCGGTGAAGAGCTGGAAACTTAAA	55120	E3 ubiquitin-protein ligase FANCL isoform 2	4.83075	3.66223
ASHGA5P003455	0.0110368	0.0462873	2.24775	up	protein_coding	NM_024052	CCDS11190.1	GID4	RefSeq	4232	chr17	+	17942610	17971718	ATAGGAGTTCAGAATGGTATCAGTCCCTCAATCTAACCCATGTTCCTGAACACAGTGCAC	79018	uncharacterized protein C17orf39	5.41309	4.2446
ASHGA5P003384	0.00555367	0.0344297	2.24749	up	protein_coding	NM_001099274	CCDS41936.1	TINF2	RefSeq	1869	chr14	-	24708850	24711880	AGCAAAAGGAGAATTGCTTGGATTGCTACATGGACCCCCTGAGACTATCATTATTACCTC	26277	TERF1-interacting nuclear factor 2 isoform 1	10.212	9.04364
ASHGA5P004566	0.00598487	0.0347809	2.24147	up	protein_coding	NM_032018	CCDS1594.1	SPRTN	RefSeq	3580	chr1	+	231473681	231490769	GAGAATAAAGATAAACCCAACAGAGGTGAGGCCCAGCTAGTAATCCCTTTTAGTGGGAAA	83932	zinc finger RAD18 domain-containing protein C1orf124 isoform a	4.83921	3.67476
ASHGA5P051894	0.0074245	0.0377978	2.24147	up	protein_coding	NM_053042	CCDS33960.1	ZNF518B	RefSeq	6936	chr4	-	10441503	10459032	GGATGTTCTTTCCTCCAAGGGCAAATAAGTAAACAGTTACTCTTTAAAGCAAGTTATCTT	85460	zinc finger protein 518B	4.9808	3.81636
ASHGA5P014545	0.00343086	0.0328172	2.2359	up	protein_coding	NM_001005526	CCDS46479.1	SF3B1	RefSeq	647	chr2	-	198283520	198299771	AGCGTCTTGATCCTTTTGCAGATGGCTTCTATTCTGCTGCTTGAAGTCAGAACTGCTGAT	23451	splicing factor 3B subunit 1 isoform 2	4.71501	3.55415
ASHGA5P004898	0.00384116	0.0329783	2.23415	up	protein_coding	NM_017437	CCDS9902.1	CPSF2	RefSeq	5072	chr14	+	92588297	92630543	AGTCCGCAGAACGGAAACTGGACGCATTGGATTAGAAGGCTGCCTTTGTCAAGATTTTTA	53981	cleavage and polyadenylation specificity factor subunit 2	4.428	3.26828
ASHGA5P051860	0.0170829	0.0585346	2.23175	up	protein_coding	NM_182524		ZNF595	RefSeq	2894	chr4	+	53226	88099	CAAGGAACATAGTTGAATGACATTTCTAGTAATCTCTAATTCCAGTGTCTTTACACAGCA	152687	zinc finger protein 595	6.81329	5.65512
ASHGA5P013122	0.00061931	0.0230282	2.22627	up	protein_coding	NM_003006	CCDS31895.1	SELPLG	RefSeq	2573	chr12	-	109015679	109027670	TCTGCTGAGCACGGTGGTGCCATGCCTCTGCAACTCCTCCTGTTGCTGATCCTACTGGGC	6404	P-selectin glycoprotein ligand 1 isoform 2 precursor	7.74268	6.58805
ASHGA5P035091	0.0152324	0.0547546	2.22485	up	protein_coding	NM_152792	CCDS1897.1	ASPRV1	RefSeq	2216	chr2	-	70187223	70189397	CCATTGTGCCTTATGCCAATAATTCAATTGCTGCAAACACCAATAAAGATTGATTCATGG	151516	retroviral-like aspartic protease 1 precursor	6.51394	5.36023
ASHGA5P047231	0.00624902	0.0353305	2.2245	up	protein_coding	ENST00000328090	CCDS41485.1	FAM208B	GENCODE	8626	chr10	+	5726800	5805703	GTTGATTAAGCAAGTATCACCTGCTGCAAGCCTTAGACATCCTGTATCCACCTCGGAAAA	54906	"family with sequence similarity 208, member B [Source:HGNC Symbol;Acc:23484]"	4.67955	3.52607
ASHGA5P001366	0.0059899	0.0347809	2.22347	up	protein_coding	NM_020244	CCDS9086.1	CHPT1	RefSeq	1567	chr12	+	102091416	102122846	AAGCACCTGAACAGGTTCAAGTTCTTTCTTCAAAGAGTCATCAGAATAACATGGATTGAA	56994	cholinephosphotransferase 1	7.70261	6.5498
ASHGA5P054999	0.0176338	0.0596399	2.21569	up	protein_coding	NM_022338	CCDS8180.1	C11orf24	RefSeq	2120	chr11	-	68028802	68039469	GCCGTGGTAGACAAAACTCTCCTTCTGGTGGTGCTGTTACTCGGGGTGACCCTTTTCATC	53838	uncharacterized protein C11orf24 precursor	5.77969	4.63194
ASHGA5P007148	0.0388885	0.0996623	2.21505	up	protein_coding	NM_178586	CCDS9965.1	PPP2R5C	RefSeq	4328	chr14	+	102276139	102394328	TAAAATAGAAAATCTAGCCAAAGCCAATCCCCAGGCACAGAAAGATCCGAAGAAGGACCG	5527	serine/threonine-protein phosphatase 2A 56 kDa regulatory subunit gamma isoform isoform b	10.2208	9.07341
ASHGA5P054570	0.00623481	0.0353305	2.21418	up	protein_coding	NM_022039	CCDS31271.1	FBXW4	RefSeq	2303	chr10	-	103370420	103454743	CCGCCCGGCCGCGGGGCCTGCGCTCTGGCGCCTGCCGGAGGAGCTGCTGCTGCTCATCTG	6468	F-box/WD repeat-containing protein 4	6.62376	5.47699
ASHGA5P053054	0.00637672	0.0354584	2.21238	up	protein_coding	NM_020192	CCDS5459.1	YAE1D1	RefSeq	907	chr7	+	39606002	39612480	TGTTCATATGTAGAATGTTGTAGAACACAGGAGCATGCACATTCAGAAAACCCAAGCCCC	57002	yae1 domain-containing protein 1	5.22258	4.07698
ASHGA5P044014	0.00938482	0.0424714	2.21072	up	protein_coding	NM_175571	CCDS34777.1	GIMAP8	RefSeq	3952	chr7	+	150147961	150176483	AGTCTTTGGTGAATACGAACGGAGGACCCTATCATGTGAACTTCAAAACTGAAGGCAGCA	155038	GTPase IMAP family member 8	5.42542	4.28091
ASHGA5P008429	0.00816689	0.0396361	2.20772	up	protein_coding	NM_181892	CCDS3661.1	UBE2D3	RefSeq	2623	chr4	-	103717132	103748340	GCACGGATCTATAAAACAGACAGAGATAAGTACAATAGGTTAGCAAGAGAGTGGACAGAG	7323	ubiquitin-conjugating enzyme E2 D3 isoform 2	5.46703	4.32448
ASHGA5P042287	0.0241057	0.0722754	2.20313	up	protein_coding	ENST00000359907	CCDS4571.1	HIST1H4A	GENCODE	372	chr6	+	26021906	26022278	TTTGGCGGTTAAGGTTGCTGATTTCTCCACAGCTTGCATTTCTGAACCAAAGGCCCTTTT	8359	"histone cluster 1, H4a [Source:HGNC Symbol;Acc:4781]"	4.66702	3.52746
ASHGA5P002943	0.00614138	0.0350489	2.19946	up	protein_coding	NM_022168	CCDS2217.1	IFIH1	RefSeq	3617	chr2	-	163123588	163175218	AATCATCTGCAAATGTGGCCAGGCTTGGGGAACAATGATGGTGCACAAAGGCTTAGATTT	64135	interferon-induced helicase C domain-containing protein 1	6.87674	5.7396
ASHGA5P045544	0.00214954	0.0306219	2.19878	up	protein_coding	NM_178138	CCDS6994.1	LHX3	RefSeq	2382	chr9	-	139088095	139096955	TCGAGCGCGACCGAGCGAGGCCCGGGGCCGCCGCCGTCTGCACCTTGGGCGGGACTCGGG	8022	LIM/homeobox protein Lhx3 isoform a	5.39486	4.25816
ASHGA5P054619	0.0220235	0.0685675	2.19619	up	protein_coding	NM_078469	CCDS7650.1	BCCIP	RefSeq	2373	chr10	+	127512103	127531376	GAAGAGGATTGGAACCAGTTCCGATACAGCACAATGGTTGGTCTGTTCCCCCAGTATTAG	56647	BRCA2 and CDKN1A-interacting protein isoform C	9.45397	8.31897
ASHGA5P004705	0.0177166	0.059845	2.19458	up	protein_coding	NM_000671	CCDS47111.1	ADH5	RefSeq	2644	chr4	-	99992129	100009931	GCCTTTGAACTGATGCATTCTGGAAAGAGCATTCGAACTGTTGTAAAGATTTAATTCAAA	128	alcohol dehydrogenase class-3	7.12071	5.98677
ASHGA5P053964	0.00249065	0.0313776	2.19332	up	protein_coding	NM_016243	CCDS1431.1	CYB5R1	RefSeq	1675	chr1	-	202931000	202936404	TACTCACAAAAGATGCGATTCACCTACTGAGCATCCTCCAGCTTCCCTGGTGCTGTTCGC	51706	NADH-cytochrome b5 reductase 1	5.03471	3.90159
ASHGA5P001508	0.0178982	0.0601151	2.19324	up	protein_coding	NM_002166	CCDS1659.1	ID2	RefSeq	1402	chr2	+	8822112	8824583	GGCTGAATAAGCGGTGTTCATGATTTCTTTTATTCTTTGCACAACAACAACAACAACAAA	3398	DNA-binding protein inhibitor ID-2	7.04536	5.91229
ASHGA5P012711	0.0373083	0.0967319	2.19251	up	protein_coding	ENST00000380067	CCDS11138.1	SLC25A35	GENCODE	2785	chr17	-	8191081	8198170	ACAGGGCAAGAACCGAGTCCCCAAGTTCTCAGCAACATCATGCAGTGCTTCAGCGCCTTT	399512	"solute carrier family 25, member 35 [Source:HGNC Symbol;Acc:31921]"	5.45817	4.32558
ASHGA5P009144	0.00507738	0.0338278	2.19118	up	protein_coding	NM_199297	CCDS8497.1	THYN1	RefSeq	862	chr11	-	134118172	134123260	GTGGTCCATGAAGAGTTTGATTTTGTTTTGAGCCTGGAGGAAAAGGAACCAAGTTAACTG	29087	thymocyte nuclear protein 1 isoform 2	6.6235	5.49179
ASHGA5P016313	0.026868	0.0777349	2.19061	up	protein_coding	NM_002017	CCDS44768.1	FLI1	RefSeq	3993	chr11	+	128563812	128683162	GACTATTAAGGAGGCTCTGTCGGTGGTGAGCGACGACCAGTCCCTCTTTGACTCAGCGTA	2313	Friend leukemia integration 1 transcription factor isoform 1	4.59608	3.46475
ASHGA5P027231	0.0228921	0.070228	2.18974	up	protein_coding	NM_001146076	CCDS53782.1	RPAP3	RefSeq	3528	chr12	-	48055714	48099844	TCCACACAAAGACAAAATGTGGTAAAACCCATTGATAATCCACCGCATCCTGGATCAACT	79657	RNA polymerase II-associated protein 3 isoform 3	4.76467	3.63391
ASHGA5P015183	0.0459136	0.111362	2.18809	up	protein_coding	NM_006083	CCDS47280.1	IK	RefSeq	1955	chr5	+	140027383	140042065	CTGACATGAATATTTTTGAAGACATTGGGGATTACGTACCCTCCACAACCAAGACACCTC	3550	protein Red	4.23431	3.10464
ASHGA5P044941	0.00537842	0.0342414	2.18808	up	protein_coding	NM_005034	CCDS6285.1	POLR2K	RefSeq	971	chr8	+	101162838	101166230	TGATGCTCGATGAATGCTGGGAATTCAGAGGAATGTCTTCACTTATACTTGGATTTGCTC	5440	"DNA-directed RNA polymerases I, II, and III subunit RPABC4"	6.70094	5.57127
ASHGA5P007857	0.0343608	0.0913926	2.18398	up	protein_coding	NM_007276	CCDS5398.1	CBX3	RefSeq	2330	chr7	+	26240830	26253227	GCCGCGAACGTAATAGCTCTTCAAGTCTGCAATAAAAAATGGCCTCCAACAAAACTACAT	11335	chromobox protein homolog 3	6.07527	4.94831
ASHGA5P014196	0.000234152	0.0182999	2.18314	up	protein_coding	NM_016830	CCDS44809.1	VAMP1	RefSeq	1104	chr12	-	6571403	6579843	GTTATTGTAAGGCGGGACTGAAGAGCTGGAAGAAAGCAGTCAGTACCCTCCCAACGGCCC	6843	vesicle-associated membrane protein 1 isoform 3	6.93447	5.80806
ASHGA5P005506	0.0319698	0.0869861	2.1811	up	protein_coding	NM_001100389	CCDS43279.1	TMEM192	RefSeq	4511	chr4	-	165997229	166034024	GATGGAGGACGGTTCCTTGGATATCACCCAGAGTATTGAAGACGACCCACTTCTGGATGC	201931	transmembrane protein 192	6.33239	5.20734
ASHGA5P013267	0.0479483	0.114171	2.17793	up	protein_coding	NM_198929	CCDS30907.1	PYHIN1	RefSeq	1995	chr1	+	158901336	158946849	CAACAACCCCATCCAGCAGTTCCTTCACCAAGGTCACCAAGGACAAGGATATCAAATAAC	149628	pyrin and HIN domain-containing protein 1 isoform beta 1	8.29238	7.16942
ASHGA5P031591	0.0114982	0.0473208	2.17452	up	protein_coding	NM_005622	CCDS10589.1	ACSM3	RefSeq	2158	chr16	+	20775311	20808479	ATTTGAGGTAGAAAATGCCCTGAATGAACACCCTTCAGTTGCAGAGTCAGCTGTTGTCAG	6296	"acyl-coenzyme A synthetase ACSM3, mitochondrial isoform 1"	4.83919	3.71849
ASHGA5P013965	0.00193803	0.029555	2.17395	up	protein_coding	NM_006178	CCDS42354.1	NSF	RefSeq	3995	chr17	+	44668034	44834828	AAGAAGGAGCTAGCCCCCTTGATTTTGATTGAAAATGAACTATTTGAAACACACAGTGAC	4905	vesicle-fusing ATPase	5.64426	4.52394
ASHGA5P027653	0.0116896	0.0477091	2.17189	up	protein_coding	NM_177551	CCDS9235.1	HCAR2	RefSeq	2082	chr12	-	123185839	123187904	TTTGCTTTTAACATTAAAAGGGAAATGTGCCTCTGCCCCACAGTTAGAGGGGTGCACGTT	338442	hydroxycarboxylic acid receptor 2	7.68133	6.56238
ASHGA5P050649	0.0151059	0.0545157	2.17149	up	protein_coding	NM_001514	CCDS715.1	GTF2B	RefSeq	1651	chr1	-	89318320	89357301	GACAAACTACCACAGCTATAAATTGAGGCAGCTAACGTCAAATTCTTGAATACAAAACTT	2959	transcription initiation factor IIB	6.95172	5.83303
ASHGA5P053770	0.0301471	0.0837202	2.17037	up	protein_coding	NM_006808	CCDS6741.1	SEC61B	RefSeq	583	chr9	+	101984569	101992901	CGGGGGCTCCGTAACTTTCTATCCGTCCGCGTCAGCGCCTTGCCACCCTCATCTCCAATA	10952	protein transport protein Sec61 subunit beta	8.02977	6.91183
ASHGA5P004052	0.00571279	0.0345994	2.16911	up	protein_coding	NM_004365	CCDS4066.1	CETN3	RefSeq	997	chr5	-	89689528	89705603	GTGATGGAGAAATAAACCAAGAGGAGTTCATTGCTATTATGACTGGTGACATTTAAAGAA	1070	centrin-3	5.87253	4.75542
ASHGA5P054790	0.00528144	0.0340831	2.16861	up	protein_coding	NM_001033505	CCDS44563.1	CSTF3	RefSeq	655	chr11	-	33162976	33183037	TTCACTGTAGTGATAGAAAACAAGTTAGGAACATAGCCAATTAGGACAAGGAGGATTTAA	1479	cleavage stimulation factor subunit 3 isoform 2	6.20434	5.08757
ASHGA5P007303	0.0069879	0.0368266	2.16775	up	protein_coding	NM_001163285	CCDS54513.1	EWSR1	RefSeq	2676	chr22	+	29663997	29696515	AAATGGATAAAGGCGAGCACCGTCAGGAGCGCAGAGATCGGCCCTACTAGATGCAGAGAC	2130	RNA-binding protein EWS isoform 3	6.83874	5.72254
ASHGA5P008858	0.0400584	0.101442	2.16759	up	protein_coding	NM_181652	CCDS8071.1	PRDX5	RefSeq	646	chr11	+	64085559	64089295	GCAGCCATGGCCCCAATCAAGGTTCGGCTCCTGGCTGATCCCACTGGGGCCTTTGGGAAG	25824	"peroxiredoxin-5, mitochondrial isoform c"	4.77933	3.66324
ASHGA5P007332	0.0051136	0.0338278	2.16667	up	protein_coding	NM_172213	CCDS1995.1	CD8B	RefSeq	1071	chr2	-	87042459	87089047	TCATGAAACAGCCTCAAGGGGAAGGTATATCAGGAACCTTTGTCCCCCAATGCCTGCATG	926	T-cell surface glycoprotein CD8 beta chain isoform 2 precursor	5.98922	4.87374
ASHGA5P017581	0.0160221	0.0563923	2.1655	up	protein_coding	NM_001002020	CCDS31928.1	PUS1	RefSeq	1666	chr12	+	132413744	132428406	GGGGCGGGAGCTCGCCGCGCATGGCCGGGAACGCGGAGCCGCCGCCCGCCGGAGCCGCAT	80324	"tRNA pseudouridine synthase A, mitochondrial isoform 2"	6.16801	5.05331
ASHGA5P044270	0.0159338	0.0563686	2.16498	up	protein_coding	NM_001146227	CCDS55231.1	RPS20	RefSeq	1013	chr8	-	56980738	56987140	AAGTGTATTCGAATCCCCGGGGACATGTCCTTTTTAACTGCATTCTCCTCCGCCAAAAAA	6224	40S ribosomal protein S20 isoform 1	6.09369	4.97934
ASHGA5P050972	0.00210209	0.0304609	2.16479	up	protein_coding	NM_016558	CCDS13269.1	SCAND1	RefSeq	1388	chr20	-	34541538	34543281	CACTGGCTGAGCGGTGGAGCTGCGGGCGGCCAGGGCCGGGCGCTCTGTGCGGACTGGGGC	51282	SCAN domain-containing protein 1 isoform 1	6.93081	5.81658
ASHGA5P027206	0.0113381	0.0470314	2.16463	up	protein_coding	ENST00000395510	CCDS31780.1	TWF1	GENCODE	3045	chr12	-	44187525	44200178	CCCAGCGGAAACTGAAGCTACTACTGATTAAAGTCATCACATTAAACATTGTAATACTAG	5756	"twinfilin, actin-binding protein, homolog 1 (Drosophila) [Source:HGNC Symbol;Acc:9620]"	4.76998	3.65586
ASHGA5P003736	0.0150944	0.0545157	2.16395	up	protein_coding	NM_138730	CCDS4989.1	HMGN3	RefSeq	894	chr6	-	79910961	79944455	CTGGAAAGGAAGGCACAGAAAACTGAATCTGTAGATAACGAGGGAGAATGAATTGTCATG	9324	high mobility group nucleosome-binding domain-containing protein 3 isoform HMGN3b	6.69611	5.58245
ASHGA5P010199	0.0108177	0.0459359	2.15926	up	protein_coding	NM_015399	CCDS8135.1	BRMS1	RefSeq	1455	chr11	-	66104803	66112582	TCAGAAGAGAAAATCGGATGGACCTTGACCCTGCTGTTCACAGCCAGGGGGACCCTCAGA	25855	breast cancer metastasis-suppressor 1 isoform 1	5.7104	4.59986
ASHGA5P029873	0.0106159	0.0454962	2.15795	up	protein_coding	ENST00000438097	CCDS32177.1	UBE3A	GENCODE	4491	chr15	-	25582395	25650653	AAACTTAAAGAGAGATTGTTGAAGGCCATCACGTATGCCAAAGGATTTGGCATGCTGTAA	7337	ubiquitin protein ligase E3A [Source:HGNC Symbol;Acc:12496]	7.41745	6.30778
ASHGA5P038144	0.0270978	0.078244	2.15135	up	protein_coding	NM_001134432	CCDS46782.1	AZI2	RefSeq	1460	chr3	-	28373179	28390618	TTCCCTCTTCGCATAAGAATAGAAGTAGCCATCAGAGTTCATATACTTTTTCAACCCTTT	64343	5-azacytidine-induced protein 2 isoform b	6.43822	5.33298
ASHGA5P053884	0.00372664	0.0329783	2.14923	up	protein_coding	NM_001039374	CCDS43906.1	KIAA1984	RefSeq	1727	chr9	+	139690789	139702193	GCTGAGCCCAGGGAGGCTTTGAGGTACACAGGGTCCCTTGGGGGGCCTGAGAGCAGCCAT	84960	uncharacterized coiled-coil domain-containing protein KIAA1984	5.72041	4.61659
ASHGA5P052536	0.0162549	0.0568447	2.14795	up	protein_coding	NM_030613	CCDS4440.1	ZFP2	RefSeq	2405	chr5	+	178322915	178360210	TCATACGTGAGGAATGTTTTCACTGGCCCTTACCTCATGATTAACTCTTCAGTAATAATC	80108	zinc finger protein 2 homolog	6.25525	5.15229
ASHGA5P037022	0.0246013	0.0732574	2.14793	up	protein_coding	NM_080825	CCDS13223.1	C20orf144	RefSeq	586	chr20	+	32250091	32251721	TGGGAAACTATAGTTCCCACAAAAGGACCAAAGCACCCAAGCAGGCCCGCAAGGAGAGGC	128864	uncharacterized protein C20orf144	4.51886	3.41592
ASHGA5P050394	0.00599301	0.0347809	2.14541	up	protein_coding	NM_030797	CCDS1688.1	FAM49A	RefSeq	4702	chr2	-	16730729	16847134	GCTTCAGTAGAGCTCTGCTCAAAGAAGAGGATCTATGTGCTGACCTCAGAAGATGTATAT	81553	protein FAM49A	6.32352	5.22227
ASHGA5P054473	0.00555937	0.0344297	2.14422	up	protein_coding	NM_001080449	CCDS44415.1	DNA2	RefSeq	4287	chr10	-	70173820	70231730	TTCTAAGCTTTCTGTGTTACCCCCGGTTCCGCTGTCTTTTCTGTCTACAGTTTGCGATCC	1763	DNA2-like helicase	9.35684	8.25639
ASHGA5P048265	0.0318817	0.0869555	2.14243	up	protein_coding	NM_001876	CCDS8185.1	CPT1A	RefSeq	5260	chr11	-	68522350	68609399	TTGGTCTCAGTTCTAATTCCAAAAAGTAATTCCACTGGAGCTGCTGGGAAGGAAAACGAG	1374	"carnitine O-palmitoyltransferase 1, liver isoform isoform 1"	4.79365	3.69441
ASHGA5P003634	0.00750814	0.0380335	2.13627	up	protein_coding	NM_014607	CCDS42761.1	UBXN4	RefSeq	4018	chr2	+	136499188	136542633	ATGCTCAGATCAGAGACCTGCAGAGGACCTCAACATCCGAGTGGAAAGACTAACAAAAAA	23190	UBX domain-containing protein 4	5.14264	4.04755
ASHGA5P010008	0.00515777	0.033892	2.13609	up	protein_coding	NM_001100418	CCDS42524.1	C19orf60	RefSeq	900	chr19	+	18699494	18703147	GACTGGAGGAGTGGTTGGCGCCGGTGCAGGGCCTGAGAGCCTGGGGGCGCGGCCTCAGGG	55049	uncharacterized protein C19orf60 isoform 1	4.51325	3.41828
ASHGA5P049155	0.0313767	0.0862014	2.13586	up	protein_coding	NM_000760	CCDS413.1	CSF3R	RefSeq	3419	chr1	-	36931643	36948915	GAGCTTCTAGGGCTTCCTGGGGTTCCCTTCTTGGGCCTGCCTCTTAAAGGCCTGAGCTAG	1441	granulocyte colony-stimulating factor receptor isoform a precursor	6.1249	5.03008
ASHGA5P010000	0.00748881	0.0380335	2.13288	up	protein_coding	NM_017890	CCDS6280.1	VPS13B	RefSeq	14100	chr8	+	100025493	100889814	AATATTGATCACTATAGAAGCAGCCTTGGGGAAGAGTGTTGGTCTTTGGGGCAATGTGGA	157680	vacuolar protein sorting-associated protein 13B isoform 5	5.46793	4.37512
ASHGA5P051331	0.00380882	0.0329783	2.13052	up	protein_coding	NM_006594	CCDS865.1	AP4B1	RefSeq	2791	chr1	-	114437370	114447741	AAGAAGTTGGTTTATCTGTACATGTGCACATATGCTCCCCTGAAACCAGATCTGGCTCTC	10717	AP-4 complex subunit beta-1 isoform 1	5.0081	3.9169
ASHGA5P051919	0.00282431	0.0318783	2.13037	up	protein_coding	NM_003263	CCDS33973.1	TLR1	RefSeq	2867	chr4	-	38797875	38806412	GCAAGCAAAGAAATAGATTACACATCAAGTGAAAAATATTCCTCCTGTTGATATTGCTGC	7096	toll-like receptor 1 precursor	6.85247	5.76137
ASHGA5P000933	0.0325028	0.0880836	2.13031	up	protein_coding	NM_003753	CCDS13930.1	EIF3D	RefSeq	1949	chr22	-	36906896	36925277	TTCTTTGACAAGAGAGACAACTCTGACTTTGACCTCCTGACAGTGAGTGAGACTGCCAAT	8664	eukaryotic translation initiation factor 3 subunit D	4.73306	3.642
ASHGA5P005038	0.000327155	0.0192182	2.12837	up	protein_coding	ENST00000437180	CCDS13639.1	RUNX1	GENCODE	5967	chr21	-	36160097	36421595	ATACTTGGAATGAATCCTTCTAGAGACGTCCACGATGCCAGCACGAGCCGCCGCTTCACG	861	runt-related transcription factor 1 [Source:HGNC Symbol;Acc:10471]	5.40965	4.3199
ASHGA5P009243	0.0298951	0.0832081	2.12515	up	protein_coding	NM_176805	CCDS10343.1	MRPS11	RefSeq	1402	chr15	+	89010683	89021861	CCAAGTTCAGCACACAGATCCAGGTAGTCTCTGCTAGTAATGAGCCCCTTGCCTTTGCTT	64963	"28S ribosomal protein S11, mitochondrial isoform b"	6.4263	5.33873
ASHGA5P002128	0.00579273	0.0347584	2.125	up	protein_coding	NM_001861	CCDS10955.1	COX4I1	RefSeq	839	chr16	+	85833172	85840607	ATGTGGCAGAAGCACTATGTGTACGGCCCCCTCCCGCAAAGCTTTGACAAAGAGTGGGTG	1327	"cytochrome c oxidase subunit 4 isoform 1, mitochondrial precursor"	12.8569	11.7695
ASHGA5P053368	0.010974	0.0461893	2.11963	up	protein_coding	NM_014374	CCDS43677.1	REPIN1	RefSeq	2894	chr7	+	150068257	150071133	AGTGACTGTGCTTTTCCACCCTCAGCAGAGGAAGAACCGATGCTGGAACGTCGTTGCAGG	29803	replication initiator 1 isoform 1	7.18246	6.09865
ASHGA5P043427	0.0059847	0.0347809	2.11776	up	protein_coding	ENST00000262187	CCDS5927.1	RHEB	GENCODE	2075	chr7	-	151163097	151217010	CTTTTGCAGCTAAAATTTCACAGGGCTATTTCTAATACGTAAGCAAATGTTACCATTGAC	6009	Ras homolog enriched in brain [Source:HGNC Symbol;Acc:10011]	5.87236	4.78982
ASHGA5P001214	0.0290518	0.081765	2.11651	up	protein_coding	NM_023948	CCDS5701.1	MOSPD3	RefSeq	1213	chr7	+	100210113	100213000	GCATTGACATTGTGATTCGCCATGTGGCACCCATTCCCAGCCACTATGATGTCCAGGACC	64598	motile sperm domain-containing protein 3 isoform a	8.88226	7.80057
ASHGA5P011983	0.0488356	0.115668	2.11614	up	protein_coding	NM_006120	CCDS4761.1	HLA-DMA	RefSeq	1122	chr6	-	32916390	32920899	GTGTCCAGAGGGTTTCCTATCGCTGAAGTGTTCACGCTGAAGCCCCTGGAGTTTGGCAAG	3108	"HLA class II histocompatibility antigen, DM alpha chain precursor"	7.3011	6.21966
ASHGA5P048704	0.00698266	0.036818	2.11591	up	protein_coding	NM_178191	CCDS44096.1	ATPIF1	RefSeq	1944	chr1	+	28562601	28564616	AAAGAGAGAGCAGGCTGAAGAGGAACGATATTTCCGGTGAGGCTCACCGGGTCCCAAGTC	93974	"ATPase inhibitor, mitochondrial isoform 3 precursor"	6.83604	5.75476
ASHGA5P054432	0.00252567	0.0314036	2.11584	up	protein_coding	NM_001098205	CCDS7204.1	HNRNPF	RefSeq	2690	chr10	-	43881064	43904332	CTATGACTAGTTTTGTTAGGAACATTTGAGTTACTTCAATCATTTTCACAGGCAGCCAAC	3185	heterogeneous nuclear ribonucleoprotein F	6.64016	5.55893
ASHGA5P002288	0.00603008	0.0348208	2.11543	up	protein_coding	NM_001143781	CCDS44870.1	FKBP11	RefSeq	561	chr12	-	49315741	49318664	ATCTGTCCCAGCGGATGCAGTGGTGCAGTATGACGTGGAGCTGATTGCACTAATCCGAGC	51303	peptidyl-prolyl cis-trans isomerase FKBP11 isoform 2	6.85791	5.77696
ASHGA5P005280	0.000293979	0.0187505	2.11483	up	protein_coding	NM_025204	CCDS14086.1	TRABD	RefSeq	2315	chr22	+	50624359	50638027	CGGACGGCGCGCTCCCCACAGGTGCAGGAAGCCGCCGCCCAGCCATGGACGGGGAGGAGC	80305	traB domain-containing protein	6.81945	5.73891
ASHGA5P012434	0.018565	0.0614674	2.10986	up	protein_coding	NM_001135570	CCDS44964.1	C12orf73	RefSeq	1720	chr12	-	104343980	104350993	ACCGGACCTGACAATACCTGAAATTCCACCAAAGCGTGGAGAACTCAAAACGGAGCTTTT	728568	uncharacterized protein C12orf73 precursor	5.75923	4.68209
ASHGA5P053264	0.0025426	0.0314036	2.10939	up	protein_coding	NM_024814	CCDS5747.1	CBLL1	RefSeq	4266	chr7	+	107384278	107402083	ATAATCCTAACTCATTACCCCAGTTCACTGAAGATCAAGGAACTCTGAGCCCTCCATTTA	79872	E3 ubiquitin-protein ligase Hakai	12.0175	10.9406
ASHGA5P011273	0.0224636	0.0694363	2.1083	up	protein_coding	NM_003828	CCDS14695.1	MTMR1	RefSeq	2732	chrX	+	149861868	149933575	TGATGGGCGAGAAATATGTAATCCCCTGGCTGACTAGGACTGTTAAACATAGTGTGGACT	8776	myotubularin-related protein 1	6.29129	5.21521
ASHGA5P000942	0.00284786	0.0318783	2.10672	up	protein_coding	NM_032632	CCDS9946.1	PAPOLA	RefSeq	4531	chr14	+	96968712	97033453	ACCAAAACAGAAGAGGATGAAACAAGTGAAGATGCTAACTGTCTTGCTTTGAGTGGACAT	10914	poly(A) polymerase alpha isoform 1	4.90252	3.82752
ASHGA5P002439	0.0208814	0.0663295	2.10607	up	protein_coding	NM_014880	CCDS33308.1	CD302	RefSeq	3995	chr2	-	160625138	160654766	GCCGTCGCGGACTGTCCTTCATCTACTTGGATTCAGTTCCAAGACAGTTGTTACATTTTT	9936	CD302 antigen isoform 1 precursor	5.96287	4.88832
ASHGA5P047460	0.00741822	0.0377978	2.10569	up	protein_coding	NM_003171	CCDS7287.1	SUPV3L1	RefSeq	2490	chr10	+	70939992	70968849	GCTGAGCAGATTGAAATGTTTGCCTACCATCTCCCTGATGCAACACTGTCCAATCTCATT	6832	"ATP-dependent RNA helicase SUPV3L1, mitochondrial precursor"	6.53186	5.45757
ASHGA5P054066	0.0343272	0.0913644	2.10558	up	protein_coding	NM_001159560	CCDS35350.1	BEX5	RefSeq	882	chrX	-	101408678	101410762	GCCTTATGCCTTGAATCTTGAGGTTAATAATCATAAAATCCCTGCTTTCTAAATTCGCAT	340542	protein BEX5	5.8087	4.73448
ASHGA5P043022	0.0070571	0.0369658	2.09987	up	protein_coding	NM_000168	CCDS5465.1	GLI3	RefSeq	8228	chr7	-	42000547	42276618	AAAGGCTAAAACAAGTGAATGGAATGTTTCCGCGACTGAACCCCATTCTACCCCCTAAAG	2737	transcriptional activator GLI3	11.012	9.94173
ASHGA5P048991	0.00744224	0.0378692	2.09985	up	protein_coding	NM_001135255	CCDS44105.1	RBBP4	RefSeq	7940	chr1	+	33116748	33151812	AAGGACAAGGGTCCTAGATATGTCTTTACTTGTTGTGATTTTAGACTCCCCTTTTTTCTT	5928	histone-binding protein RBBP4 isoform b	4.22772	3.15744
ASHGA5P039167	0.0251073	0.0742863	2.09573	up	protein_coding	NM_001130841	CCDS44178.1	RTCA	RefSeq	2634	chr1	+	100731713	100758325	ACAGGACCAGTTACACTCCATACGCAAACCGCGATACATTTTGCTGAACAAATAGCAAAG	8634	RNA 3'-terminal phosphate cyclase isoform a	6.42866	5.3612
ASHGA5P021169	0.00213257	0.0306219	2.09479	up	protein_coding	NM_152433	CCDS8334.1	KBTBD3	RefSeq	4030	chr11	-	105921824	105948465	GCAGTTGCAGTTCTAAGGACATATGGAATTGGCTATGGATAATTCATATGCTTTCAATCA	143879	kelch repeat and BTB domain-containing protein 3	4.46097	3.39417
ASHGA5P042393	0.0235394	0.0713253	2.08526	up	protein_coding	ENST00000451237	CCDS34425.1	B3GALT4	GENCODE	1686	chr6	+	33244916	33246602	ATCTGTTTCCTTATACCAGATCCTCAGTCTCACTAAAGACAGCGATATGGGAGACACCCA	8705	"UDP-Gal:betaGlcNAc beta 1,3-galactosyltransferase, polypeptide 4 [Source:HGNC Symbol;Acc:919]"	6.07788	5.01766
ASHGA5P019097	0.000463499	0.0211759	2.08472	up	protein_coding	NM_033429	CCDS10226.2	CALML4	RefSeq	4655	chr15	-	68483042	68498448	CAAATTAATGAGTACAAGGAATGCTTCTCCCTGTATGACAAGCAGCAGAGGGGGAAGATA	91860	calmodulin-like protein 4 isoform 1	7.07687	6.01701
ASHGA5P001392	0.032068	0.0871371	2.08372	up	protein_coding	ENST00000373479	CCDS4834.1	RNF8	GENCODE	5631	chr6	+	37321747	37362514	TACTTCATTGAGGCTGTCACCTTGAACTGTGCCCACAGTTTCTGCTCCTACTGTATCAAT	9025	"ring finger protein 8, E3 ubiquitin protein ligase [Source:HGNC Symbol;Acc:10071]"	4.0978	3.03864
ASHGA5P045922	0.00452204	0.033633	2.08332	up	protein_coding	NM_000607	CCDS6803.1	ORM1	RefSeq	847	chr9	+	117085302	117088759	GAAGCTCTCGACTGCTTGCGCATTCCCAAGTCAGATGTCGTGTACACCGATTGGAAAAAG	5004	alpha-1-acid glycoprotein 1 precursor	4.22248	3.16359
ASHGA5P005229	0.029965	0.0833116	2.08316	up	protein_coding	NM_005054	CCDS2082.1	RGPD5	RefSeq	7182	chr2	-	113125964	113191107	GTTGCTCAAGATGAGGAAGAAAATCCTTCCCGTTCTTCTGGATGAGCATCCTATCTTCGT	84220	RANBP2-like and GRIP domain-containing protein 5/6 isoform 1	5.45997	4.4012
ASHGA5P055061	0.004878	0.0338278	2.08164	up	protein_coding	NM_001039618	CCDS41697.1	CREBZF	RefSeq	7575	chr11	-	85368607	85376182	CTCTTAAAATGTAGGGTCAAGTAATCTGCTCTTTATCCGCGTTTACCCCTTTCAACTCCC	58487	CREB/ATF bZIP transcription factor	4.37119	3.31347
ASHGA5P019096	0.00303559	0.032171	2.07707	up	protein_coding	NM_198596	CCDS13409.2	SULF2	RefSeq	4239	chr20	-	46286149	46415360	GCAGTGTAACCCCCGGACTCGAAACATGGACCTGGATGGAGGAAGCTATGAGCAATACAG	55959	extracellular sulfatase Sulf-2 isoform b precursor	7.58136	6.52681
ASHGA5P034126	0.00512039	0.0338278	2.07619	up	protein_coding	NM_173531	CCDS42538.1	ZNF100	RefSeq	4479	chr19	-	21906842	21950430	GGAGCAAGTGGATGCCCTGGGGCTGAGAGGAGTCTTCTGGTGCAGTCTTATTTTGAAAAG	163227	zinc finger protein 100	5.9809	4.92696
ASHGA5P003897	0.00455285	0.033633	2.07423	up	protein_coding	NM_004927	CCDS8096.1	MRPL49	RefSeq	2119	chr11	+	64889715	64894841	ACGGCTGTTGAGCCAGACCCAGGGCCCTCCAGATTACCCCAGGTTTGTGGAGTCTGTGGA	740	"39S ribosomal protein L49, mitochondrial"	4.77237	3.71979
ASHGA5P034426	0.0297199	0.0829471	2.07054	up	protein_coding	NM_001171155	CCDS54208.1	PET100	RefSeq	349	chr19	+	7694670	7696510	GCGGAACTGGCTTTGTTGACCGGGAGAAACGAGATGGGGGTGAAGCTGGAGATATTTCGG	100131801	uncharacterized protein C19orf79	6.74593	5.69593
ASHGA5P049264	0.0143021	0.0530424	2.06876	up	protein_coding	NM_003869	CCDS10825.1	CES2	RefSeq	3955	chr16	+	66968346	66978994	AGGCAGACCATGGTGATGAGCTTCCTTTTGTTTTCAGAAGTTTCTTTGGGGGCAACTACA	8824	cocaine esterase isoform 1	6.8601	5.81134
ASHGA5P050314	0.0209219	0.0663754	2.06692	up	protein_coding	NM_001079907	CCDS33102.1	ZNF331	RefSeq	4171	chr19	+	54058560	54083523	AGAGAATCCACACAGGCGAAACCCCGTATAAATGTAAGGAGTGTGGGAAGGCTTTCATTT	55422	zinc finger protein 331	4.99342	3.94593
ASHGA5P002714	0.0194666	0.0632353	2.06593	up	protein_coding	NM_006601	CCDS31836.1	PTGES3	RefSeq	1932	chr12	-	57057124	57082078	CGTTCACAATGCAGCCTGCTTCTGCAAAGTGGTACGATCGAAGGGACTATGTCTTCATTG	10728	prostaglandin E synthase 3	4.95127	3.90448
ASHGA5P053681	0.0100263	0.0439495	2.06536	up	protein_coding	NM_001039592	CCDS43798.1	SPAG8	RefSeq	1715	chr9	-	35809806	35812259	TTGCCCTATGAACCTGAGAATTACCCCTACCAATTGGGAGAAATATCTTCCCTTCCCTGT	26206	sperm-associated antigen 8 isoform 1	7.11132	6.06493
ASHGA5P003347	0.0154303	0.0552121	2.06364	up	protein_coding	NM_003095	CCDS9055.1	SNRPF	RefSeq	806	chr12	+	96252708	96260238	TGGTTACGATGAGTTTACCCCTCAATCCCAAACCTTTCCTCAATGGACTAACAGGAAAGC	6636	small nuclear ribonucleoprotein F	8.78877	7.74358
ASHGA5P039769	0.00902465	0.0415991	2.06131	up	protein_coding	NM_175918	CCDS3349.1	CRIPAK	RefSeq	4467	chr4	+	1385339	1389782	TCGTATCAGACCTTTTAATGAATTTTCATGGATGCTGATTAAAAGACAAACCTGTGACTC	285464	cysteine-rich PAK1 inhibitor	7.22664	6.18307
ASHGA5P007831	0.0113331	0.0470314	2.05899	up	protein_coding	NM_201269	CCDS731.1	ZNF644	RefSeq	5776	chr1	-	91380856	91487812	GTTAGAAAAGCTATAGAGAAGTCTGAAACCACTTCTGAACACACTTGTCAGCTCTGTGGT	84146	zinc finger protein 644 isoform 1	4.82376	3.78183
ASHGA5P054202	0.0122107	0.0489932	2.05774	up	protein_coding	NM_001018055		BRCC3	RefSeq	2877	chrX	+	154299694	154351349	GAAAAGGAAGAGCTTATGCAAGAACTTTCTTCTCTAGAATAAATCAGGAGACAAAATGGG	79184	lys-63-specific deubiquitinase BRCC36 isoform 2	4.041	2.99994
ASHGA5P006732	0.0220139	0.0685675	2.05352	up	protein_coding	NM_005397	CCDS47714.1	PODXL	RefSeq	5911	chr7	-	131185020	131241376	GGGATGACCACCACCCTACCGTCATCGGTTATCTCGCAAAGAACTCAACAGACCTCCAGT	5420	podocalyxin isoform 2 precursor	8.9014	7.8633
ASHGA5P053988	0.0268815	0.0777517	2.04583	up	protein_coding	NM_001098408	CCDS43943.1	GAGE12C	RefSeq	564	chrX	+	49325444	49332811	ACAGTGTTAAAAGAAGACACGTTGAAATGATGCAGGCTGCTCCTATGTTGGAAATTTGTT	729422	G antigen 12B/C/D/E	6.08184	5.04916
ASHGA5P010725	0.00241249	0.0311898	2.04507	up	protein_coding	NM_000574	CCDS31006.1	CD55	RefSeq	2812	chr1	+	207494816	207534311	CTTCTATCTGGGCACACGTGTTTCACGTTGACAGGTTTGCTTGGGACGCTAGTAACCATG	1604	complement decay-accelerating factor isoform 1 preproprotein	7.01821	5.98606
ASHGA5P052593	0.0150039	0.0543353	2.04385	up	protein_coding	NM_003530	CCDS4590.1	HIST1H3D	RefSeq	864	chr6	-	26197011	26199464	GAGGGCGTAAATTGTCTTGTGAATGTGTGCTAACCAAAACCCAAAGGCTCTTTTCAGAGC	8351	histone H3.1	4.85893	3.82764
ASHGA5P003737	0.00276896	0.0318783	2.04277	up	protein_coding	NM_001142401	CCDS47464.1	CD164	RefSeq	3089	chr6	-	109687716	109703762	AAGTGGGGAACACGACAGACTTCTGTTCCGCTAAACCCACAGTTCAGCCCTCCCCTTCTA	8763	sialomucin core protein 24 isoform 2 precursor	8.25757	7.22705
ASHGA5P002932	0.0246818	0.0733653	2.04253	up	protein_coding	NM_001642	CCDS8486.1	APLP2	RefSeq	3827	chr11	+	129939715	130014706	TTGTACCACCCAATGAAAAAAGGATCTGGAGTGGGAGAGCAGGATGGGGGACTGATCGGT	334	amyloid-like protein 2 isoform 1 precursor	7.22901	6.19865
ASHGA5P055255	0.0319164	0.0869593	2.04161	up	protein_coding	NM_006422	CCDS8531.1	AKAP3	RefSeq	3027	chr12	-	4724675	4754343	ATCAGTCATTGTACATGGGGAATGAACCCACACCCACCAAAAGCCTCAGTAAGATAGCAT	10566	A-kinase anchor protein 3	7.60091	6.5712
ASHGA5P002421	0.0275309	0.0790244	2.0409	up	protein_coding	NM_025250	CCDS34588.1	TTYH3	RefSeq	4838	chr7	+	2671602	2704436	TCTACGACTGGTACAGGTGGCTGGGCTACCTGGGCCTGCTGCTGCTGGACGTCATCATCT	80727	protein tweety homolog 3	7.0064	5.9772
ASHGA5P001308	0.0107142	0.045705	2.0407	up	protein_coding	NM_024806	CCDS8438.1	C11orf63	RefSeq	2929	chr11	+	122753472	122830430	AAACTCAAAAGAAATCTGCTATCCCTCGGCAGAAGGCTTTGGAATACGCTAAGACCATCC	79864	uncharacterized protein C11orf63 isoform 1	4.6763	3.64723
ASHGA5P006905	0.0424644	0.105586	2.04038	up	protein_coding	NM_032737	CCDS12090.1	LMNB2	RefSeq	4644	chr19	-	2428162	2456966	ATCTTTTCCACCAACAGGGGGACCCGAGGACCACCTCAAGAGGCTGCTACGTGATGTGAA	84823	lamin-B2	6.54883	5.51999
ASHGA5P032788	0.0432245	0.107032	2.03789	up	protein_coding	NM_001160246	CCDS54079.1	RPAIN	RefSeq	1362	chr17	+	5322960	5336340	ATACTTGGGCTGTGATCCTCTAGAGCCAGCTTGGACTCACATCATTCTATGGGGTTGAAG	84268	RPA-interacting protein isoform d	9.42582	8.39874
ASHGA5P009923	0.0115449	0.0474223	2.0377	up	protein_coding	NM_032121	CCDS14436.2	MAGT1	RefSeq	4035	chrX	-	77081861	77151065	AAGAATCCCCACACGGGACATGTGAATTATATCCATGGAAGCAGTCAAGCCCAGTTTGTA	84061	magnesium transporter protein 1	5.12978	4.10284
ASHGA5P030912	0.003363	0.032685	2.03371	up	protein_coding	NM_198087	CCDS42112.1	ZNF200	RefSeq	3179	chr16	-	3272324	3285457	TTGCAAAAAATGTGGGAGAAGATTTGGTCGGCTGTCAAACTGTACCCGGCATGAGAAAAC	7752	zinc finger protein 200 isoform 2	5.59387	4.56975
ASHGA5P052837	0.0098931	0.0436849	2.03088	up	protein_coding	NM_138459	CCDS5118.1	NUS1	RefSeq	4811	chr6	+	117996616	118031886	AAACTAGAAATTGAGAGTCTTGCATTCTCTTTTGTATTTGATTATTGTGTCTGGATATAA	116150	nogo-B receptor precursor	5.37826	4.35616
ASHGA5P042046	0.00668358	0.0361389	2.02916	up	protein_coding	NM_001145659	CCDS47475.1	CTAGE9	RefSeq	2577	chr6	-	132029580	132032157	CACAGCAAGACACCTGACAATATTGTTGCTTTCTTCAAAAGTAATTTTGACTGATCTCAT	643854	cutaneous T-cell lymphoma-associated antigen 9	5.96594	4.94506
ASHGA5P013729	0.0115648	0.0474558	2.02821	up	protein_coding	NM_016489	CCDS34617.1	NT5C3	RefSeq	1846	chr7	-	33053724	33080777	TGTGAAAATGATGCCAGAATTCCAGAAAAGTTCAGTTCGAATCAAGAACCCTACAAGAGT	51251	cytosolic 5'-nucleotidase 3 isoform 2	4.38075	3.36055
ASHGA5P005800	0.0202301	0.0648879	2.02769	up	protein_coding	NM_031492	CCDS8149.1	RBM4B	RefSeq	1814	chr11	-	66432469	66445275	TTTTAAAAACTGGAGGTAGGATAATTGCGGACTGAACCCTCGGGCTGCGGTCATATATGA	83759	RNA-binding protein 4B	7.71062	6.69079
ASHGA5P001722	0.00546433	0.0343796	2.02761	up	protein_coding	NM_005033	CCDS3722.2	EXOSC9	RefSeq	1593	chr4	+	122722471	122738176	GGAAGCCAAGATGCTCCCATAATACTCTCAGATAGTGAAGAAGAAGAAATGATCATTTTG	5393	exosome complex component RRP45 isoform 2	6.8876	5.86782
ASHGA5P047836	0.0354982	0.0935871	2.02744	up	protein_coding	ENST00000332314	CCDS44520.1	MRGPRG	GENCODE	870	chr11	-	3239173	3240043	TGCCCTCGGTCTTCTACTGGAGCCTGCAGCCCCTGCTGAACTTCCTGCTGCCCGTGTTTT	386746	"MAS-related GPR, member G [Source:HGNC Symbol;Acc:24829]"	9.25332	8.23367
ASHGA5P007836	0.0252225	0.0744378	2.02665	up	protein_coding	NM_058216	CCDS11611.1	RAD51C	RefSeq	1295	chr17	+	56769962	56811692	TGTTCCTGCATTAGGGGAAAGTTGGGGACATGCTGCTACAATACGGCTAATCTTTCATTG	5889	DNA repair protein RAD51 homolog 3 isoform 1	5.73213	4.71303
ASHGA5P008437	0.00646289	0.0355515	2.02549	up	protein_coding	NM_001912	CCDS6675.1	CTSL1	RefSeq	1730	chr9	+	90340973	90346384	GTGGACACAGGTTTTAAAACATGAATCCTACACTCATCCTTGCTGCCTTTTGCCTGGGAA	1514	cathepsin L1 isoform 1 preproprotein	4.2972	3.27893
ASHGA5P007105	0.00963372	0.0431379	2.02333	up	protein_coding	NM_015213	CCDS31423.1	DENND5A	RefSeq	4979	chr11	-	9160374	9286873	TTTCAGATGCTGGTGTGCTTGGGAGCCAGAGATCACCTCCTACACCACTGGATTGCCCTG	23258	DENN domain-containing protein 5A isoform 1	4.59362	3.57688
ASHGA5P015811	0.00571866	0.0346119	2.02304	up	protein_coding	NM_001105533	CCDS47690.1	CPED1	RefSeq	2844	chr7	+	120629444	120901972	AGGAAGGAAGTTGGGTGTCGATGTCCAGAGAGTTCCTAGAAGCCGTAATTGAAGACACAA	79974	uncharacterized protein C7orf58 isoform 2 precursor	4.56866	3.55213
ASHGA5P005666	0.000314629	0.0189595	2.01865	up	protein_coding	NM_020225	CCDS47167.1	STOX2	RefSeq	4654	chr4	+	184826508	184938875	ATGACATCAGGTGATGTATCACCCATCAGTATGTCTCCCATCAGTCAGTCTCAGTTTATT	56977	storkhead-box protein 2	4.71035	3.69695
ASHGA5P054297	0.00798487	0.0392577	2.01689	up	protein_coding	NM_014236	CCDS1592.1	GNPAT	RefSeq	2687	chr1	+	231376918	231413719	GAAAACCAGCCACTGCAAAACTTTAATAATCAACAAATAGTTATGGAAAATTCGGTCACG	8443	dihydroxyacetone phosphate acyltransferase	7.23011	6.21797
ASHGA5P053888	0.0350572	0.0927363	2.01058	up	protein_coding	NM_004669	CCDS7021.1	CLIC3	RefSeq	813	chr9	-	139889059	139891024	AGGAGAAAGAGTTCAAATACACGTGTCCGCACAGCGCCGAGATCCTGGCGGCCTACCGGC	9022	chloride intracellular channel protein 3	6.16156	5.15395
ASHGA5P000896	0.00757538	0.0382221	2.00841	up	protein_coding	NM_002415	CCDS13819.1	MIF	RefSeq	561	chr22	+	24236564	24237409	GCCCGGACAGGGTCTACATCAACTATTACGACATGAACGCGGCCAATGTGGGCTGGAACA	4282	macrophage migration inhibitory factor	7.41628	6.41023
ASHGA5P006270	0.00326454	0.0326774	2.00744	up	protein_coding	NM_014232	CCDS32561.1	VAMP2	RefSeq	2173	chr17	-	8062464	8066293	ATCATCATCATAGTTTACTTCAGCACTTAAATCCCCGAGGAGTCTGCCCTGCCTAGAGAA	6844	vesicle-associated membrane protein 2	6.40541	5.40005
ASHGA5P053467	0.00410006	0.0330909	2.00645	up	protein_coding	NM_001007214	CCDS30942.1	CACYBP	RefSeq	2875	chr1	+	174968570	174981163	GGAATTTTGAGACTTTAAAGTCGTTTTGGGAACTGTGATGTGATGTGGAAATACTGATGT	27101	calcyclin-binding protein isoform 2	7.46217	6.45753
ASHGA5P056058	0.00591554	0.034773	2.00628	up	protein_coding	NM_018373	CCDS9803.1	SYNJ2BP	RefSeq	7074	chr14	-	70833212	70883807	CCTCACCATGGTAGCAGCCTGGGCTTTCATGAGATACCGGCAACAACTTTGAAAAACTTG	55333	synaptojanin-2-binding protein	4.64028	3.63575
ASHGA5P055766	0.00367481	0.0329783	2.00493	up	protein_coding	NM_018559	CCDS9394.1	KIAA1704	RefSeq	1431	chr13	+	45563686	45602404	CACCAGATTTTCACACGGCAAAGGCAATATGTTTTTATAAGTAAGTATATTTCAGTGAGG	55425	uncharacterized protein KIAA1704	5.52707	4.52351
ASHGA5P008020	0.0105531	0.0453176	2.00285	up	protein_coding	NM_001042472	CCDS42857.1	ABHD12	RefSeq	2140	chr20	-	25280833	25371618	ATTTACAAGAGCCCTGAGCTGCCACGGATACTGAGGGAATTCCTGGGGAAGTCGGAGCCT	26090	monoacylglycerol lipase ABHD12 isoform a	4.42759	3.42554
ASHGA5P035744	0.0240352	0.0722512	2.00225	up	protein_coding	NM_004040	CCDS1699.1	RHOB	RefSeq	2384	chr2	+	20646834	20649201	ATGTGAAATTTTCTCTGCACCTCTGTACAGAGAATACACCTGCCCCTGTATATCCTTTTT	388	rho-related GTP-binding protein RhoB precursor	6.96878	5.96715
