# Supplementary material for: Age and poverty status alter the coding and noncoding transcriptome
Source: Aging (Albany NY). 2019 Feb 17;11(4):1189–203. doi: 10.18632/aging.101823 (PMC6402526; doi:10.18632/aging.101823)
Supplement: Supplementary Table 9 [file aging-11-101823-s010.xlsx]

## Sheet: down in AP
Supplementary Table 9. mRNAs significantly lower in abundance in white males living above poverty.
ProbeName	P-value	FDR	Fold Change	Regulation	type	seqname	ccdsID	GeneSymbol	source	RNAlength	chrom	strand	txStart	txEnd	Sequence	EntrezID	product	group-AP(normalized)	group-BP(normalized)
ASHGA5P006510	0.0182671	0.0608526	11.5903	down	protein_coding	NM_005238	CCDS8475.1	ETS1	RefSeq	5242	chr11	-	128328655	128392205	CCCTCCCCGGATATGGAATGTGCAGATGTCCCACTATTAACTCCAAGCAGCAAAGAAATG	2113	protein C-ets-1 isoform 2	7.3927	10.9275
ASHGA5P003638	0.00634167	0.0354584	8.71884	down	protein_coding	NM_031445	CCDS2152.1	AMMECR1L	RefSeq	4698	chr2	-	128619206	128642434	TTTCTGCTTTCAGGTTCTGCAGCATTCCAGACCTTGAGCACTGAATCAGGATGGGAAAAA	83607	AMMECR1-like protein	4.30696	7.4311
ASHGA5P012030	0.0108014	0.0458855	8.02487	down	protein_coding	NM_003671	CCDS6721.1	CDC14B	RefSeq	5472	chr9	-	99262394	99382112	TTCCTCTCACTCTCTCCATTTCAAGGACTAAAACAGTCTTGCGTTAAGTAAAAACCTGTG	8555	dual specificity protein phosphatase CDC14B isoform 1	5.18958	8.19406
ASHGA5P012224	0.00539612	0.0342494	7.63775	down	protein_coding	NM_001954	CCDS4690.1	DDR1	RefSeq	3840	chr6	+	30851860	30867933	AATGGCTCTGCCTACAGTGGGGACTATATGGAGCCTGAGAAGCCAGGCGCCCCGCTTCTG	780	epithelial discoidin domain-containing receptor 1 isoform 1 precursor	4.56814	7.50128
ASHGA5P055284	0.021453	0.0675014	7.34421	down	protein_coding	NM_024865	CCDS31736.1	NANOG	RefSeq	2098	chr12	+	7941994	7948655	TTTTTCCTCCTCTTCCTCTATACTAACATGAGTGTGGATCCAGCTTGTCCCCAAAGCTTG	79923	homeobox protein NANOG	6.52564	9.40225
ASHGA5P036903	0.0159893	0.0563923	6.43157	down	protein_coding	NM_006943	CCDS12995.1	SOX12	RefSeq	4645	chr20	+	306238	310867	AGGCCTGCTTCCTCTTCTTCCTCTTCTTTTCACAGGTGCTTATTCCTAATAAACATCTTG	6666	transcription factor SOX-12	8.24522	10.9304
ASHGA5P034443	0.00416391	0.0330909	6.39378	down	protein_coding	ENST00000305625	CCDS12209.1	MBD3L1	GENCODE	748	chr19	+	8953268	8954016	ATAGTGCAGATGAAATAAAGTGTAATCCTTTATTAACATCTCTTTGCAGTGTCCCCAATG	85509	methyl-CpG binding domain protein 3-like 1 [Source:HGNC Symbol;Acc:15774]	3.31493	5.9916
ASHGA5P050131	0.0216422	0.067774	5.66454	down	protein_coding	NM_133644	CCDS32950.1	GTPBP3	RefSeq	2708	chr19	+	17448325	17453540	TCTCTCTCTGCCTGCCTTCTCTCACCCACAGCCGACATCGAAGTACGGGCACTGCAGGTG	84705	"tRNA modification GTPase GTPBP3, mitochondrial isoform IV"	8.32482	10.8268
ASHGA5P047409	0.0349821	0.0925858	5.62604	down	protein_coding	NM_003055	CCDS7231.1	SLC18A3	RefSeq	2440	chr10	+	50818346	50820766	TGTGTAGAGCCTGCATCTGTCTGTCCTTCCTTCCATTGCTCCCAGTGCCAAACTTGGGCC	6572	vesicular acetylcholine transporter	6.93682	9.42894
ASHGA5P007584	0.0264434	0.0769214	5.52925	down	protein_coding	NM_013373	CCDS13776.1	ZDHHC8	RefSeq	5029	chr22	+	20119363	20135530	ACACCACCATCACCATGGCTGTCATGTGTGTGGCCGGCCTCTTCTTCATCCCTGTCATTG	29801	probable palmitoyltransferase ZDHHC8 isoform 2	6.44987	8.91695
ASHGA5P008969	0.0434087	0.10726	5.49545	down	protein_coding	ENST00000349339	CCDS13270.1	C20orf152	GENCODE	1927	chr20	+	34556528	34618622	AGAAATTTTGGCCTTCCTTCCAGAGGGTGAATGCGACACACGACCCTTGATCCTGATGAG	140894	chromosome 20 open reading frame 152 [Source:HGNC Symbol;Acc:16145]	5.0627	7.52094
ASHGA5P001326	0.00325755	0.0326774	5.46827	down	protein_coding	NM_133504	CCDS9040.1	DCN	RefSeq	1570	chr12	-	91539034	91572329	TCTGATTTGGAACTGGGCACCAATCCGCTGAAGAGCTCAGGAATTGAAAATGGGGCTTTC	1634	decorin isoform b precursor	5.51019	7.96127
ASHGA5P049996	0.0292441	0.0820399	5.31148	down	protein_coding	NM_020783	CCDS11922.1	SYT4	RefSeq	4111	chr18	-	40847856	40857615	GTCTTCACAGTCTCTCTCTTTGCATGGATCTGCTGTCAGAGAAAATCATCCAAGTCTAAC	6860	synaptotagmin-4	4.9801	7.38922
ASHGA5P047291	0.0408001	0.1025	5.27553	down	protein_coding	NM_178161	CCDS7143.1	PTF1A	RefSeq	1339	chr10	+	23481459	23483181	GCCTTTCCTTCTTCGTACTTCGACGAGGACGACTTCTTCACCGACCAGTCTTCACGGGAC	256297	pancreas transcription factor 1 subunit alpha	3.75631	6.15563
ASHGA5P052516	0.00561802	0.034492	5.27162	down	protein_coding	ENST00000253490	CCDS43401.1	FAM153B	GENCODE	2096	chr5	+	175511908	175543458	ATGACTTTTACCTCATTTTTAAAACAAATCCATAGTATGGTAAGTTACATCAATATGGAG	202134	"family with sequence similarity 153, member B [Source:HGNC Symbol;Acc:27323]"	3.8182	6.21645
ASHGA5P054165	0.00091914	0.0246175	5.23573	down	protein_coding	NM_175868	CCDS14708.1	MAGEA6	RefSeq	1787	chrX	+	151867244	151870814	AGGTGCCCTCTCACTTCCTCCTTCAGGTTCTGAGGGGACAGGCTGACCTGGAGGACCAGA	4105	melanoma-associated antigen 6	8.60729	10.9957
ASHGA5P008997	0.00978516	0.0434342	5.2268	down	protein_coding	NM_013291	CCDS34966.1	CPSF1	RefSeq	4494	chr8	-	145618445	145634733	CTTTAAGAAGGTCCCTCACAACATCAACTTCCGTGAGAAGAAGCCAAAGCCATCCAAGAA	29894	cleavage and polyadenylation specificity factor subunit 1	3.12853	5.51446
ASHGA5P050528	0.014541	0.0534829	5.13806	down	protein_coding	NM_001135041	CCDS46342.1	DCTN1	RefSeq	4166	chr2	-	74588280	74601862	TCCTCTCCTTGCTTTCTTTGGTTTTCTGCAATGATGAGACAGGCACCGACAGCCCGAAAG	1639	dynactin subunit 1 isoform 4	4.68709	7.04831
ASHGA5P046670	0.00454679	0.033633	5.07234	down	protein_coding	NM_001017417	CCDS48174.1	CT45A1	RefSeq	1008	chrX	+	134847184	134856988	TGTGGCTGGCTGCTTCCCTTCCTTCCATCCCCTTTGGACCAAACGGGATCGGTGCTTCTG	541466	cancer/testis antigen family 45 member A1	10.3325	12.6751
ASHGA5P054559	0.00546511	0.0343796	4.97815	down	protein_coding	NM_001308	CCDS7486.1	CPN1	RefSeq	1756	chr10	-	101802064	101841642	GCAAGATGTCAGACCTGCTCTCAGTCTTCCTCCACCTCCTCCTTCTCTTCAAGTTGGTTG	1369	carboxypeptidase N catalytic chain precursor	7.93526	10.2509
ASHGA5P054838	0.00668254	0.0361389	4.97041	down	protein_coding	NM_001193473	CCDS53626.1	FOLH1	RefSeq	2266	chr11	-	49168186	49230222	TCTCCTGGAGGCAGATGTTGCCTCTCTCTCTCGCTCGGATTGGTTCAGTGCACTCTAGAA	2346	glutamate carboxypeptidase 2 isoform 5	6.4608	8.77416
ASHGA5P044963	0.00368274	0.0329783	4.94507	down	protein_coding	NM_001100117	CCDS55269.1	RIMS2	RefSeq	6797	chr8	+	104512975	105266656	TATTGCCAAACAAAGTTCTGTGCTCGTTGTGGAGGTCGAGTGTCATTACGCTCAAACAAG	9699	regulating synaptic membrane exocytosis protein 2 isoform a	3.33088	5.63688
ASHGA5P032403	0.0337918	0.090446	4.92701	down	protein_coding	NM_033184	CCDS32648.1	KRTAP2-4	RefSeq	812	chr17	-	39221367	39222131	GTCACCATCATCTTTTGCAATGTGTTGCTCACTGTTGTCAATAAACTAATTTTTCCTGGC	85294	keratin-associated protein 2-4	3.81872	6.11943
ASHGA5P017735	0.038153	0.0981973	4.91028	down	protein_coding	ENST00000445202	CCDS44764.1	PATE3	GENCODE	1336	chr11	+	125658005	125661495	TGTTCCTCTTCCTCCTTTACTGCCTCATTGTGGCAGTGACATCACTTCAGTGCATAACAT	100169851	prostate and testis expressed 3 [Source:HGNC Symbol;Acc:35426]	6.05168	8.34749
ASHGA5P027299	0.0240494	0.0722512	4.87129	down	protein_coding	ENST00000252252	CCDS8828.1	KRT6B	GENCODE	2282	chr12	-	52840434	52845910	CTGCTTTCTCTGCTCTCTTTGCCTTCTTTTGTTCTGTTGAATAAAGCATATTGAGAATGT	3854	keratin 6B [Source:HGNC Symbol;Acc:6444]	5.95522	8.23952
ASHGA5P040173	0.0188719	0.0620355	4.80658	down	protein_coding	ENST00000435205	CCDS47146.1	FAM160A1	GENCODE	4576	chr4	+	152330397	152584784	AGATCCATCCATTTTAGAACTCTTCTTCCACACTAGTGAAGACCAAGGCGCTGCCAACTT	729830	"family with sequence similarity 160, member A1 [Source:HGNC Symbol;Acc:34237]"	3.64739	5.9124
ASHGA5P042666	0.00145086	0.0274621	4.78256	down	protein_coding	NM_198569	CCDS47489.1	GPR126	RefSeq	6934	chr6	+	142623055	142767403	CACCACCCACTGTCACCACTAACATGCCTGTTACTAACAGAATCGATAAACAAAGGAATG	57211	G-protein coupled receptor 126 beta 1 precursor	5.90062	8.1584
ASHGA5P047424	0.0412681	0.103343	4.74784	down	protein_coding	NM_012242	CCDS7246.1	DKK1	RefSeq	1815	chr10	+	54074040	54077417	AAGTGACGGTCATTTTCTCTTTCTTTCTCCCTCTTGAGTCCTTCTGAGATGATGGCTCTG	22943	dickkopf-related protein 1 precursor	5.98453	8.2318
ASHGA5P008180	0.000335509	0.0192182	4.73696	down	protein_coding	NM_015056	CCDS33577.1	RRP1B	RefSeq	5087	chr21	+	45079431	45115960	TCAGCGGCTCAACACCTGTTCATTCAGACCTTTTGGCAAACCATGAATCGAGAATGGAAA	23076	ribosomal RNA processing protein 1 homolog B	3.69943	5.94339
ASHGA5P055737	0.000914035	0.0246175	4.71273	down	protein_coding	NM_001185085	CCDS53858.1	ATP12A	RefSeq	3750	chr13	+	25254548	25285923	ACTTCCCCTGTAGGCACTGTCACCGGCATGGTTATCAACACGGGTGACCGCACCATCATT	479	potassium-transporting ATPase alpha chain 2 isoform 1	5.66129	7.89785
ASHGA5P008192	0.00708659	0.0370591	4.70652	down	protein_coding	ENST00000340790	CCDS46001.1	PALM3	GENCODE	2260	chr19	-	14164178	14169971	GTTTGTTCACACTCCAGTCCCAGCTGCAACTGTTGCAAAGTGCTTCCACAGGTGCCCAGC	342979	paralemmin 3 [Source:HGNC Symbol;Acc:33274]	4.55455	6.78921
ASHGA5P001081	1.41696e-05	0.00759712	4.68742	down	protein_coding	NM_016563	CCDS10200.1	RASL12	RefSeq	2603	chr15	-	65345674	65360388	GGCAAGTCTGCCCTGACCGTGAAGTTTCTGACCAAGAGGTTTATCAGTGAATATGACCCC	51285	ras-like protein family member 12	5.08796	7.31675
ASHGA5P005557	0.0282313	0.0803266	4.62433	down	protein_coding	NM_145003	CCDS6384.1	TSNARE1	RefSeq	1915	chr8	-	143293440	143484543	TCATCATCATCATCGCCACCTCTGTCCGAAAGTGATGCTACCCGTGCATCGGCCGCTGAA	203062	t-SNARE domain-containing protein 1	5.83335	8.0426
ASHGA5P003362	0.0122666	0.0490403	4.60707	down	protein_coding	NM_024068	CCDS8911.1	NABP2	RefSeq	1404	chr12	+	56618124	56623638	GCTGGCTTGGTGGGGTGCCGAGGCTCAGGCAGCATGACGACGGAGACCTTTGTGAAGGAT	79035	SOSS complex subunit B1	4.88291	7.08676
ASHGA5P053254	0.0279916	0.079986	4.59279	down	protein_coding	NM_182715	CCDS47685.1	SYPL1	RefSeq	2300	chr7	-	105730813	105752791	TCTCTCCCTCCTTTCCTCAGAGGATGTCCGGCTTCCAGATCAACCTCAACCCGCTCAAGG	6856	synaptophysin-like protein 1 isoform b	8.60153	10.8009
ASHGA5P007750	0.0222057	0.0689034	4.59253	down	protein_coding	NM_003672	CCDS769.1	CDC14A	RefSeq	4287	chr1	+	100818022	100985833	TTCTATCCCTTCCCTTCAGTCTGAATATGTTCATTACTAAGGCCTTGCCACTCCAGTGAA	8556	dual specificity protein phosphatase CDC14A isoform 1	6.60938	8.80868
ASHGA5P010759	0.0485135	0.115039	4.5432	down	protein_coding	NM_017909	CCDS5232.1	RMND1	RefSeq	1928	chr6	-	151725988	151773316	TTCCTTCTTCTCTTCCGGCGGAGAGCTTGGGATGTGGTAATGCCAGCCACACTCCTCAGA	55005	required for meiotic nuclear division protein 1 homolog	3.44378	5.62748
ASHGA5P035115	0.0278364	0.079699	4.43222	down	protein_coding	ENST00000394003	CCDS54369.1	DCTN1	GENCODE	4479	chr2	-	74588280	74607482	TTTTCTCTCTGTCTTTGGCCAGCTGGGGGAGGGGGTAGAGGCCGGGTGAGCAACATGGCA	1639	dynactin 1 [Source:HGNC Symbol;Acc:2711]	5.42103	7.56906
ASHGA5P042562	0.0221233	0.0688011	4.42255	down	protein_coding	NM_145315	CCDS5067.1	LACE1	RefSeq	2262	chr6	+	108616097	108844251	TCTCTCTTCTGGGTTCCAATAAAGTTTTCCTCTTCCTCTCCTCGTACGGAGTTCAAGATG	246269	lactation elevated protein 1	5.95345	8.09833
ASHGA5P042432	0.0315047	0.0864179	4.39523	down	protein_coding	ENST00000341495	CCDS34446.1	TREML4	GENCODE	2070	chr6	+	41196061	41206120	TCCCTTTTTTCTCCTCTCCTCCGCTGTCAGAAACAGATCTGGGCTGGAATGGCCTGGGGT	285852	triggering receptor expressed on myeloid cells-like 4 [Source:HGNC Symbol;Acc:30807]	7.31726	9.4532
ASHGA5P051823	0.0133378	0.0513639	4.34893	down	protein_coding	NM_001167931	CCDS54696.1	IL1RAP	RefSeq	2930	chr3	+	190231839	190374986	TATCCTATAATTACTGTGTGTGGTGGGTGGTGGCTACTATCTCTACCAACCCTCTGTATG	3556	interleukin-1 receptor accessory protein isoform 3 precursor	4.6501	6.77076
ASHGA5P045805	0.00839719	0.0400666	4.32816	down	protein_coding	NM_178828	CCDS6676.1	FAM75E1	RefSeq	4471	chr9	+	90497771	90503814	ACCAGTGTGTGTGGCCTAGTGCTCCTCTTCCTATTGCTCCTCTACGTCCACAGTGACCCA	286234	protein FAM75E1	5.75034	7.8641
ASHGA5P010423	0.026866	0.0777349	4.2882	down	protein_coding	NM_006589	CCDS1103.1	FAM189B	RefSeq	3209	chr1	-	155216995	155225274	CACTCTAGTGATCTCCTTCTTCTCCTTGCTTTCGGTGCTCTGTGTCATGCTTAGCATGGC	10712	protein FAM189B isoform a	5.70928	7.80965
ASHGA5P054576	0.0107185	0.045705	4.28216	down	protein_coding	NM_031271	CCDS6080.1	TEX15	RefSeq	10155	chr8	-	30689059	30706533	AATTCTGCCTCCTCCTCAGAAGTTGTCCCTGGTGATTGTGCTGTTCTTACTAATGGTTTG	56154	testis-expressed sequence 15 protein	6.68589	8.78423
ASHGA5P052811	0.00263463	0.0317621	4.2386	down	protein_coding	NM_175768	CCDS5049.1	GRIK2	RefSeq	4679	chr6	+	101846860	102517958	GCCACCATACCATCCAGACACTGTTTAGTAATCTTTTGAAACTTACTAAAAGAGGTTTTT	2898	"glutamate receptor, ionotropic kainate 2 isoform 2 precursor"	3.58902	5.67261
ASHGA5P032351	0.00552287	0.0343796	4.22315	down	protein_coding	ENST00000297307	CCDS11293.1	SLC35G3	GENCODE	1874	chr17	-	33519538	33521412	TGTTAATCTAGAAGAAAGTGGTTGCATAGAGAAGAGTAAGAATGTAGACCAGCTTATTGA	146861	"solute carrier family 35, member G3 [Source:HGNC Symbol;Acc:26848]"	4.33889	6.41721
ASHGA5P055970	0.0391793	0.0999799	4.22225	down	protein_coding	NM_003317	CCDS9659.1	NKX2-1	RefSeq	2352	chr14	-	36985603	36988903	TTTTCCTCCTCTTCCTTCCTCCTCCAGCCGCCGCCGAATCATGTCGATGAGTCCAAAGCA	7080	homeobox protein Nkx-2.1 isoform 2	11.2558	13.3338
ASHGA5P031074	0.0198524	0.0641001	4.21479	down	protein_coding	NM_003609	CCDS10664.1	HIRIP3	RefSeq	3065	chr16	-	30003641	30007417	AGGAAAGGCAGGACACGAAGCTCCTCTTCCTCCTCAGATGGAAGTCCAGAGGCCAAAGGA	8479	HIRA-interacting protein 3 isoform 1	5.45687	7.53233
ASHGA5P052643	0.00070522	0.023569	4.1875	down	protein_coding	ENST00000274853	CCDS43444.1	PPP1R18	GENCODE	4599	chr6	-	30644165	30655672	CTGTCCCCAGTGCTCCCTACCCTCACCTCAAGACGACCATGGCCACCATCCCAGACTGGA	170954	"protein phosphatase 1, regulatory subunit 18 [Source:HGNC Symbol;Acc:29413]"	8.40376	10.4699
ASHGA5P010308	0.00104408	0.0253141	4.14493	down	protein_coding	ENST00000398802	CCDS41670.1	SLC25A45	GENCODE	2286	chr11	-	65142662	65150142	GCTGGCTGGATCTCTGGCGCTCTGGGCTTGGTCCTGGGACACCCGTTTGACACTGTAAAG	283130	"solute carrier family 25, member 45 [Source:HGNC Symbol;Acc:27442]"	7.24723	9.29857
ASHGA5P020378	0.0283832	0.0806302	4.13967	down	protein_coding	NM_001167741	CCDS54872.1	MTX3	RefSeq	7882	chr5	-	79272538	79287088	GGTGGTGATGGCGATGTACCAATTTTGACAACTGAAGACGACATGGTTTCTCAGCCAGCA	345778	metaxin-3 isoform 1	3.78679	5.83631
ASHGA5P013466	0.010571	0.0453608	4.12552	down	protein_coding	ENST00000393982	CCDS43393.1	FABP6	GENCODE	663	chr5	+	159626047	159665729	TGATGATGGTGGTGGAGATGCAGGCGCTGACTCAGGTTCTGAGAGCTGTGTTGTCTGCGT	2172	"fatty acid binding protein 6, ileal [Source:HGNC Symbol;Acc:3561]"	3.56115	5.60572
ASHGA5P002609	0.0101627	0.0442352	4.12139	down	protein_coding	NM_199039	CCDS3449.1	KLHL5	RefSeq	7545	chr4	+	39063851	39127853	GTTCATGCAGATTGGTGCTCTCCTCTGTCTCAGACTATTTTGCTGCCATGTTTACTAATG	51088	kelch-like protein 5 isoform 2	5.07596	7.11909
ASHGA5P049246	0.00221351	0.0308881	4.08123	down	protein_coding	NM_020807	CCDS32462.1	ZNF319	RefSeq	4220	chr16	-	58028572	58033762	CCTGCCCTGACTCTGCGGCTGTGGCCCCTACCAGCCTGACCTGAGTCGGCGCCGTGGGCC	57567	zinc finger protein 319	7.58283	9.61183
ASHGA5P013530	0.0149452	0.0542054	4.07546	down	protein_coding	NM_001039372	CCDS43616.1	HEPACAM2	RefSeq	2092	chr7	-	92817899	92855782	ATACCTCCTTCTCTTCGGTGCTTGCTCGGGGCTGAAGGTGACAGTGCCATCACACACTGT	253012	HEPACAM family member 2 isoform 1 precursor	4.61698	6.64394
ASHGA5P052887	0.0335776	0.0901568	4.06635	down	protein_coding	NM_025107	CCDS5239.1	MYCT1	RefSeq	3066	chr6	+	153019029	153045715	AGATTCCTGAGTAGGGTGGCTTTTGGTTTTTGTTTCTTTCTTGTCTTGTCTTTTATTGAA	80177	myc target protein 1	3.93413	5.95786
ASHGA5P011409	0.00478467	0.0338278	4.0568	down	protein_coding	NM_006434	CCDS31252.1	SORBS1	RefSeq	5402	chr10	-	97071529	97200937	TGATGATAAAGAGATGAGACCTGCCAGAGCCAAATTTGACTTTAAAGCTCAGACACTAAA	10580	sorbin and SH3 domain-containing protein 1 isoform 1	3.59969	5.62003
ASHGA5P013330	0.0244743	0.0729432	4.04743	down	protein_coding	NM_001024956	CCDS8435.1	SC5DL	RefSeq	7019	chr11	+	121163576	121184119	AGAGGCTGGCAGGGGCTAAGTGATGGATCTTGTACTCCGTGTTGCAGATTACTATTTTTT	6309	lathosterol oxidase	3.52387	5.54088
ASHGA5P052578	0.0426889	0.106009	4.01623	down	protein_coding	NM_153020	CCDS4538.1	RBM24	RefSeq	2399	chr6	+	17282931	17294099	TTTAGAGGTTATGTATGTATGTCTGTGTGTGTCTGTTGCTAAGGTCACCATGGCTGACCG	221662	RNA-binding protein 24 isoform 2	4.53985	6.5457
ASHGA5P048670	4.7523e-05	0.0121181	4.00971	down	protein_coding	ENST00000434505	CCDS32217.1	CKMT1A	GENCODE	1779	chr15	+	43985083	43991420	ACCTCACTTTACCTTCTCCTCCAGCACAGGAACTAGGAACTACGGAGAGAGAAGCCAAGG	548596	"creatine kinase, mitochondrial 1A [Source:HGNC Symbol;Acc:31736]"	4.13172	6.13522
ASHGA5P010536	0.0128592	0.0502096	4.00005	down	protein_coding	ENST00000361874	CCDS1939.1	DCTN1	GENCODE	4500	chr2	-	74588280	74607482	CTCCTCCTTCAGGCATTGCTACTCTGGTCTCTGGCATTGCTGGTGAAGAACAGCAGCGAG	1639	dynactin 1 [Source:HGNC Symbol;Acc:2711]	4.62458	6.6246
ASHGA5P006532	0.012057	0.0484707	3.99923	down	protein_coding	NM_003934	CCDS43893.1	FUBP3	RefSeq	3175	chr9	+	133454959	133513739	CAGCAGGTCCCAAGCCAGCAGAGCCAGCCGCAGAGCAGCCAGCCCAACTACAGCAAGGCC	8939	far upstream element-binding protein 3	5.88802	7.88775
ASHGA5P008981	0.00223583	0.0309205	3.9912	down	protein_coding	NM_198195	CCDS2910.1	UBA3	RefSeq	2094	chr3	-	69103880	69129524	ATGGCGAGGAGCCAATGGCTGTTGATGGTGGGTGTGGGGACACTGGAGACTGGGAAGGTC	9039	NEDD8-activating enzyme E1 catalytic subunit isoform 2	2.75582	4.75264
ASHGA5P030572	0.027169	0.078383	3.98811	down	protein_coding	NM_001005279	CCDS30902.1	OR6K2	RefSeq	975	chr1	-	158669467	158670442	CTCCCTTCTTCAACCCCATTATCTATAGCCTGAGGAATAAAGAAATAAAAGAAGCTATAA	81448	olfactory receptor 6K2	5.12744	7.12315
ASHGA5P003845	0.00310853	0.0323215	3.98082	down	protein_coding	NM_006757	CCDS7727.1	TNNT3	RefSeq	1217	chr11	+	1940798	1959936	AGCCCTTCTCACACTCGACCCGCAGAAACCACCCACCTTCACCATGTCTGACGAGGAAGT	7140	"troponin T, fast skeletal muscle isoform 1"	7.77203	9.76509
ASHGA5P052592	0.0468601	0.112347	3.97325	down	protein_coding	ENST00000377791	CCDS4585.1	HIST1H2AC	GENCODE	546	chr6	+	26124372	26124918	TTTTGTTTGTTTTCTCGTGAGCTTAGGCCGCTGGTTTTGGTGATTTTTGTCTGATTGCAA	8334	"histone cluster 1, H2ac [Source:HGNC Symbol;Acc:4733]"	4.19691	6.18722
ASHGA5P001218	0.00323283	0.0326774	3.96021	down	protein_coding	NM_001084	CCDS5715.1	PLOD3	RefSeq	2995	chr7	-	100849257	100861011	CCGGCATGAGGATTCAAGGCTGGCTGGAGGCTACGAGAATGTGCCCACCGTGGACATCCA	8985	"procollagen-lysine,2-oxoglutarate 5-dioxygenase 3 precursor"	4.29185	6.27742
ASHGA5P013919	0.00624489	0.0353305	3.9449	down	protein_coding	NM_025078	CCDS12020.1	PQLC1	RefSeq	2565	chr18	-	77662419	77711653	TCCTTCCTGGACTTCGACCCCCACCACTTCTGGCAGTGGAGCAGCTTCTCGGACTACGTG	80148	PQ-loop repeat-containing protein 1 isoform 1	7.48689	9.46688
ASHGA5P050058	0.00820095	0.0396879	3.94267	down	protein_coding	NM_182919	CCDS12136.1	TICAM1	RefSeq	2727	chr19	-	4815935	4831754	ACCTGTGCCCATGGCCTGCACAGGCCCATCACTTCCTAGCGCCTTCGACATTCTAGGTGC	148022	TIR domain-containing adapter molecule 1	5.06585	7.04502
ASHGA5P049237	0.0226972	0.069867	3.92002	down	protein_coding	ENST00000332374	CCDS10767.1	MT1H	GENCODE	397	chr16	+	56703725	56705041	GTTCCACTGCCTCTTCTCTTCTCGCTTGGGAACTCCAGTCTCACCTCGGCTTGCAATGGA	4496	metallothionein 1H [Source:HGNC Symbol;Acc:7400]	6.3002	8.27106
ASHGA5P052922	0.0300468	0.0834935	3.90837	down	protein_coding	NM_001129895		HGC6.3	RefSeq	1016	chr6	-	168376603	168377619	CCTCCTCCCAACACACTGCAGGGGGAATGACCCCCACTGTCTTCTCCTCCCAACACACTG	100128124	uncharacterized protein LOC100128124	7.54229	9.50885
ASHGA5P045118	0.0101654	0.0442352	3.90024	down	protein_coding	NM_024896	CCDS34983.1	ERMP1	RefSeq	5355	chr9	-	5784571	5833081	CCTGATGTTGTGCTGGCATCCATTTTGGCTGGCTGTACAATGATTCTCTCGTCCTATTTT	79956	endoplasmic reticulum metallopeptidase 1	4.46916	6.43272
ASHGA5P012010	0.0197082	0.0637673	3.89626	down	protein_coding	NM_005216	CCDS212.1	DDOST	RefSeq	2144	chr1	-	20978259	20988037	AATCTCATCATTTTCTCCCCTTCGGTAGAAGATTTTGGAGGCAACATCAACGTGGAGACC	1650	dolichyl-diphosphooligosaccharide--protein glycosyltransferase 48 kDa subunit precursor	4.00775	5.96984
ASHGA5P052452	0.00378175	0.0329783	3.88767	down	protein_coding	NM_001387	CCDS43381.1	DPYSL3	RefSeq	5066	chr5	-	146770370	146833260	GCTGCAGCCACCACCGCCACCATGTCCTACCAAGGCAAGAAGAACATCCCGCGGATCACG	1809	dihydropyrimidinase-related protein 3 isoform 2	6.67839	8.6373
ASHGA5P017080	0.0122663	0.0490403	3.88039	down	protein_coding	NM_002397	CCDS47245.1	MEF2C	RefSeq	6449	chr5	-	88014057	88179283	ATTGATCTAATGATCAGCAGGCAAAGATTGTGTGCTGTTCCACCTCCCAACTTCGAGATG	4208	myocyte-specific enhancer factor 2C isoform 1	5.39676	7.35296
ASHGA5P042465	0.00422087	0.0332515	3.87318	down	protein_coding	ENST00000340057	CCDS4937.1	IL17A	GENCODE	1859	chr6	+	52051184	52055436	AAACTCATCCATCCCCAGTTGATTGGAAGAAACAACGATGACTCCTGGGAAGACCTCATT	3605	interleukin 17A [Source:HGNC Symbol;Acc:5981]	5.4334	7.38692
ASHGA5P002519	0.0037608	0.0329783	3.83929	down	protein_coding	NM_020396	CCDS10148.1	BCL2L10	RefSeq	887	chr15	-	52401821	52404972	AGGGCGGCTGGGATGGCTTTTGTCACTTCTTCAGGACCCCCTTTCCACTGGCTTTTTGGA	10017	bcl-2-like protein 10	7.79904	9.73988
ASHGA5P045645	0.0241213	0.072293	3.81081	down	protein_coding	ENST00000366474	CCDS31115.1	OR2T1	GENCODE	1110	chr1	+	248569295	248570405	TGTATGTGTGCTGTGTTTTGATGCTGCTGATTCCTTTCTCTGTAGTCCTTGCTTCCTATG	26696	"olfactory receptor, family 2, subfamily T, member 1 [Source:HGNC Symbol;Acc:8277]"	4.3735	6.3036
ASHGA5P054710	0.011133	0.0465949	3.8086	down	protein_coding	NM_003754	CCDS7785.1	EIF3F	RefSeq	1274	chr11	+	8008866	8017719	ATTTCCGCTTCCGCCTCCTTCTTTCTCGACAAGATGGCCACACCGGCGGTACCAGTAAGT	8665	eukaryotic translation initiation factor 3 subunit F	6.04992	7.97919
ASHGA5P014456	0.00333684	0.032685	3.80022	down	protein_coding	NM_001103148	CCDS46543.1	GIGYF2	RefSeq	7735	chr2	+	233562014	233725289	CACAGTCCTGGCTGGCGGGAACACATGGAACGACGTCGGAGGTTTGAGTTTGATTTTCGA	26058	PERQ amino acid-rich with GYF domain-containing protein 2 isoform c	3.8354	5.76148
ASHGA5P010800	0.00290609	0.0319013	3.79039	down	protein_coding	NM_001194999	CCDS53442.1	MR1	RefSeq	7725	chr1	+	181002560	181031074	AATCACTCAGATAATGTGGCTCACACCATCAAGCAGGCATGGGAGGCCAATCAGCATGAG	3140	major histocompatibility complex class I-related gene protein isoform 2 precursor	3.30467	5.22701
ASHGA5P037712	0.00246808	0.0313471	3.78264	down	protein_coding	NM_002883	CCDS14012.1	RANGAP1	RefSeq	3040	chr22	-	41641614	41682216	TGTGGCTGGCAGAAACCGTCTGGAGAATGATGGCGCCACTGCCTTGGCAGAAGCTTTTAG	5905	ran GTPase-activating protein 1	4.00875	5.92814
ASHGA5P004687	0.0323994	0.0878734	3.74934	down	protein_coding	NM_001142646	CCDS46899.1	TPRA1	RefSeq	1743	chr3	-	127291911	127309568	AGCTCCTGCTTCTTCTTCCTGCTGTGTAGATGCCACAACCTTCCTGTACTTCAGCTTCTT	131601	transmembrane protein adipocyte-associated 1 isoform 2	5.97645	7.88309
ASHGA5P050680	0.0140182	0.0525594	3.74893	down	protein_coding	NM_000726	CCDS46426.1	CACNB4	RefSeq	7979	chr2	-	152689285	152955593	GGCCATGCGGCGGCTCTGAACGATGTCCTCCTCCTCCTACGCCAAGAACGGGACCGCGGA	785	voltage-dependent L-type calcium channel subunit beta-4 isoform b	7.79132	9.6978
ASHGA5P045491	0.0336477	0.0902224	3.74558	down	protein_coding	NM_001131016	CCDS6894.1	CIZ1	RefSeq	3016	chr9	-	130928343	130953868	CCCCCAAGGCAGGTGCAGCTGCAGCTGCAGAAGCAGGTCCAGACACAGACATATCCACAG	25792	cip1-interacting zinc finger protein isoform 1	3.09986	5.00505
ASHGA5P040844	0.00741991	0.0377978	3.72844	down	protein_coding	ENST00000327245	CCDS43394.1	ATP10B	GENCODE	7566	chr5	-	159990126	160279219	TTTACCTCCTTGCCTCCTCTTGTCTTTGGAGTCCTTGACAAAGACATCTCTGCAGAAACA	23120	"ATPase, class V, type 10B [Source:HGNC Symbol;Acc:13543]"	5.44991	7.34848
ASHGA5P005868	0.0132984	0.0512574	3.70188	down	protein_coding	NM_003183	CCDS1665.1	ADAM17	RefSeq	3572	chr2	-	9629410	9695917	AGTATGAATCTCTGTCTCTGTTTCACCCCAGTAACGTCGAAATGCTGAGCAGCATGGATT	6868	disintegrin and metalloproteinase domain-containing protein 17 preproprotein	6.19208	8.08034
ASHGA5P042525	0.00185468	0.0290776	3.69089	down	protein_coding	NM_138409	CCDS5001.1	MRAP2	RefSeq	2229	chr6	+	84743419	84800605	TTCGTGATTTTTATGTTTTTTGTGCTGACCTTGCTGACCAAGACAGGAGCCCCACACCAA	112609	melanocortin-2 receptor accessory protein 2	4.29642	6.18039
ASHGA5P004324	0.00275239	0.0318783	3.68409	down	protein_coding	ENST00000290101	CCDS53277.1	RAP1GAP	GENCODE	3301	chr1	-	21922707	21978348	CTTCACCTTCGGGGCCTACGGCGGGGTGGACAAGTCCTTCACTTCTCGCCGGAGTGTGTG	5909	RAP1 GTPase activating protein [Source:HGNC Symbol;Acc:9858]	6.10554	7.98684
ASHGA5P005956	0.0351812	0.0929438	3.66744	down	protein_coding	NM_001093728	CCDS47413.1	TCP11	RefSeq	1941	chr6	-	35085848	35109187	CCCCCTCCCTTTCTTTCTGTCACAGGTCTGACAGAAACCGTTAATGAAGTTTCCAAGCTG	6954	T-complex protein 11 homolog isoform 1	10.6023	12.477
ASHGA5P053323	0.000889855	0.0244999	3.65808	down	protein_coding	NM_014149	CCDS34758.1	WDR91	RefSeq	4619	chr7	-	134868589	134896316	TCCGTCCCTCACCGCACCACCCCTAAAGACGCTAGCGCTGCGATGGCGGAGGCCGTGGAG	29062	WD repeat-containing protein 91	7.37438	9.24547
ASHGA5P011222	0.00825616	0.03984	3.64421	down	protein_coding	NM_001077394	CCDS41358.1	DPH5	RefSeq	1828	chr1	-	101455179	101491362	ATTGGCTGCTCCTAGTCTCTCTTCTCCTCAAGTTTGAAATGCTTTATCTCATCGGGTTGG	51611	diphthine synthase isoform a	5.52128	7.38689
ASHGA5P006381	0.037749	0.097527	3.64344	down	protein_coding	NM_139211	CCDS3507.1	HOPX	RefSeq	1154	chr4	-	57514153	57522688	TCAAAATCACCCCCGCGCTTCCTTCACTCCTTCCTTAGAGCCGGAGCGCGCAGGGACCAT	84525	homeodomain-only protein isoform b	7.4959	9.3612
ASHGA5P028245	4.09879e-05	0.0121181	3.63406	down	protein_coding	NM_001093771	CCDS53820.1	TXNRD1	RefSeq	3869	chr12	+	104609556	104744085	CGGCCGCCCCAACGGAGCTGCAGACGAAAGGCAAGAACGGCGATGGCCGCCGTAGGTCAG	7296	"thioredoxin reductase 1, cytoplasmic isoform 3"	2.99186	4.85344
ASHGA5P034340	0.0280919	0.0801828	3.63103	down	protein_coding	NM_198988	CCDS12895.2	LENG9	RefSeq	1930	chr19	-	54972978	54974894	TCTCTTTCTCTCTTTAATTTTGGTTTCTCTCAAGCTTCCAAATGGTGCTCAGTGCTCCAA	94059	leukocyte receptor cluster member 9	6.37483	8.23521
ASHGA5P012951	0.000292312	0.0187505	3.60569	down	protein_coding	NM_018290	CCDS3443.1	PGM2	RefSeq	3238	chr4	+	37828281	37864559	CCCCTTTGTGCCCTTCACAGTATCACATTTGAAACTTTGTGCTGGAATCATGATAACTGC	55276	phosphoglucomutase-2	8.42099	10.2713
ASHGA5P007493	0.0187183	0.0617682	3.60037	down	protein_coding	NM_001001713	CCDS33560.1	SH3BGR	RefSeq	1017	chr21	+	40817796	40887433	ATTATTTATTCCTTCCTTGGTTTGGCTCCTCCTCCAGACTCAAAGGGATCAGAGAAGGCT	6450	SH3 domain-binding glutamic acid-rich protein isoform b	5.94813	7.79627
ASHGA5P044376	0.0108827	0.0460763	3.59289	down	protein_coding	NM_172239		REXO1L1	RefSeq	7032	chr8	-	86758550	86789306	TGGAAGGCAAAAGCTACTGAATTTAGCGAATTTGTGGAGGCATTGCCACAAATCAGCCAG	254958	exonuclease GOR	3.41973	5.26487
ASHGA5P050884	0.00159525	0.0280187	3.56953	down	protein_coding	NM_001167599	CCDS54441.1	NEU4	RefSeq	2373	chr2	+	242752029	242758739	AGTGGGCCCCGGGAGTCCCCTCCAGCCTCCACTCCTCGGTCCTGGAGTCCACGAACCCCC	129807	sialidase-4 isoform 2	8.32938	10.1651
ASHGA5P055944	0.0247543	0.0734982	3.5471	down	protein_coding	NM_001136022	CCDS45089.1	NFATC4	RefSeq	5672	chr14	+	24836144	24848810	CTGGAGGAAGGTGGGTGTGGGACTGGGGGCTGTGAGTGTGAGTGTGTGCAAGAGATTGCT	4776	"nuclear factor of activated T-cells, cytoplasmic 4 isoform 1"	6.06408	7.89072
ASHGA5P054147	0.0380572	0.0980746	3.53554	down	protein_coding	NM_005462	CCDS35417.1	MAGEC1	RefSeq	4337	chrX	+	140991641	140997187	CGAGTTCCTTCTTCTCCTCTGCTTTATTGAGTATTTTCCAGAGTTCCCCTGAGAGTACTC	9947	melanoma-associated antigen C1	6.01738	7.83931
ASHGA5P026248	0.0236346	0.0715297	3.51202	down	protein_coding	NM_147193	CCDS582.1	GLIS1	RefSeq	2816	chr1	-	53971905	54199877	AGTTTCCACTCCATCCAGAGTTGCTTCCCCTATGGCGACTGCTACCGGATGGCTGAACCA	148979	zinc finger protein GLIS1	7.29404	9.10634
ASHGA5P006660	0.0258621	0.0757061	3.51029	down	protein_coding	NM_004204	CCDS10412.1	PIGQ	RefSeq	2993	chr16	+	619967	634136	AGGCTGGCGGCTGGCGTGAAGTTCCGTGTCCTCCGGCACGAGGCCGGCAGGCCCCTCCGC	9091	phosphatidylinositol N-acetylglucosaminyltransferase subunit Q isoform 2	5.89581	7.70739
ASHGA5P045043	0.000752984	0.023569	3.50474	down	protein_coding	NM_003882	CCDS6371.1	WISP1	RefSeq	5194	chr8	+	134203281	134243932	TACAACAACGGCCAGTCCTTCCAGCCTAACTGCAAGTACAACTGCACGTGCATCGACGGC	8840	WNT1-inducible-signaling pathway protein 1 isoform 1 precursor	3.35014	5.15945
ASHGA5P008988	0.0174632	0.0592794	3.49201	down	protein_coding	NM_138297	CCDS3311.1	MUC4	RefSeq	3958	chr3	-	195473637	195538844	TGTGTCTCTGCCTCCTTCCGCATGTGGTCCCAGGAGTTTCCCTCTTCCCCTATGGGGCAG	4585	mucin-4 isoform e precursor	7.56308	9.36714
ASHGA5P010819	0.0275871	0.0791633	3.48316	down	protein_coding	NM_020318	CCDS41438.1	PAPPA2	RefSeq	6940	chr1	+	176432306	176811970	GTCATGTGAGCCCTTCCAAGCAGATGGTTGGTGTGACACTATCAACAACCGAGCCTACTG	60676	pappalysin-2 isoform 1 precursor	4.13985	5.94025
ASHGA5P051609	0.0136077	0.05182	3.45804	down	protein_coding	NM_016247	CCDS2940.1	IMPG2	RefSeq	8365	chr3	-	100941389	101039419	TCTGTCCTCTCCTCATTCCTTTGGTTTTGGCCCAAATGATTATGTTTCCTCTTTTTGGGA	50939	interphotoreceptor matrix proteoglycan 2 precursor	5.71659	7.50655
ASHGA5P050340	0.0336351	0.0902224	3.45748	down	protein_coding	ENST00000391718	CCDS33116.2	ZNF628	GENCODE	3847	chr19	+	55987698	55995854	TTGTCCAGACTCTACCCGCAGTCCAGCTGGTGCACACGTTTTGAGGAGAGGCAGTGATTC	89887	zinc finger protein 628 [Source:HGNC Symbol;Acc:28054]	4.21067	6.00039
ASHGA5P002971	0.00321405	0.0326774	3.44327	down	protein_coding	NM_002344	CCDS10077.1	LTK	RefSeq	3143	chr15	-	41795839	41806085	GGGGCGGCAGGTGGTGGGGGCGGCTGGACGTCGCGGGCTCCCTCTCCGCAGGCCGGCCGC	4058	leukocyte tyrosine kinase receptor isoform 1 precursor	6.10693	7.89071
ASHGA5P042410	0.020201	0.0648496	3.4316	down	protein_coding	ENST00000394571	CCDS54997.1	PNPLA1	GENCODE	2478	chr6	+	36238236	36276372	TCACTCCATCTCCTTCTCGGGCAGTGGATTCCTCTCCTTCTACCAGGCGGGGGCTGTGGA	285848	patatin-like phospholipase domain containing 1 [Source:HGNC Symbol;Acc:21246]	8.48548	10.2644
ASHGA5P001267	0.0477754	0.113845	3.42951	down	protein_coding	NM_018952	CCDS11531.1	HOXB6	RefSeq	1686	chr17	-	46673098	46682334	TGCTCCACTCCGGTCTACCCGTGGATGCAGCGGATGAATTCGTGCAACAGTTCCTCCTTT	3216	homeobox protein Hox-B6	5.7235	7.5015
ASHGA5P037481	0.0393913	0.10032	3.41963	down	protein_coding	NM_005239	CCDS13659.1	ETS2	RefSeq	3784	chr21	+	40177754	40196878	TCTCTCTGCCTCAATAAGCCAACCATGTCTTTCAAGGATTACATCCAAGAGAGGAGTGAC	2114	protein C-ets-2 isoform 1	3.74511	5.51895
ASHGA5P003760	0.00953366	0.0428216	3.41891	down	protein_coding	ENST00000275838	CCDS47749.2	ASB10	GENCODE	1820	chr7	-	150872784	150884478	CCTCCCCAAGAAACATCAGCGTTTCTACTCCTCCCTCTTCGCCTTGGTGAGGCAGCCCAG	136371	ankyrin repeat and SOCS box containing 10 [Source:HGNC Symbol;Acc:17185]	6.63783	8.41137
ASHGA5P008310	0.00703702	0.0369326	3.40373	down	protein_coding	NM_001004313	CCDS32567.1	TMEM220	RefSeq	3092	chr17	-	10616638	10633646	GGTGTGGGTGGTGGTGTACACAATCCCTGCAGTACTGACCCTGCTTGTTGGACTTAACCC	388335	transmembrane protein 220 precursor	4.57381	6.34092
ASHGA5P029376	1.14588e-05	0.00714349	3.39986	down	protein_coding	NM_001163258	CCDS53361.1	FAM63A	RefSeq	2250	chr1	-	150969300	150980854	AGAGACATGTAAAGGGGATGCTGCTTGGTCCTCCTCCTTTTAATGAAAGCACGAAACCTT	55793	protein FAM63A isoform 3	4.93554	6.70102
ASHGA5P039971	0.0178563	0.0600648	3.38382	down	protein_coding	ENST00000304915	CCDS3540.1	SMR3B	GENCODE	785	chr4	+	71248794	71255961	GGTCCAGGGAGAATCCCACCTCCTCCTCCCGCACCCTATGGTCCAGGGATATTTCCACCA	10879	submaxillary gland androgen regulated protein 3B [Source:HGNC Symbol;Acc:17326]	9.44623	11.2049
ASHGA5P014000	0.0348862	0.0924039	3.38201	down	protein_coding	NM_014709	CCDS42686.1	USP34	RefSeq	11326	chr2	-	61414589	61697849	TCATGGACTGTGTGGCAGCTAGACTGTCTTGCTTGCTTGCTGAAGTTAATATGCCAGTTT	9736	ubiquitin carboxyl-terminal hydrolase 34	4.66223	6.4201
ASHGA5P049860	0.00284011	0.0318783	3.36143	down	protein_coding	NM_198955	CCDS45788.1	MGAT5B	RefSeq	4068	chr17	+	74868728	74946471	GTCTGGAGCTCAGCCCCCATCCTTTCATTCTCCCTTGCTTCCTTCACTCATGCACTCATT	146664	"alpha-1,6-mannosylglycoprotein 6-beta-N-acetylglucosaminyltransferase B isoform 2"	8.43996	10.189
ASHGA5P051949	0.0240671	0.0722512	3.34983	down	protein_coding	NM_133267	CCDS3494.1	GSX2	RefSeq	1212	chr4	+	54966247	54968122	TTGCCCGCGGGTGAACCATGCGCATCATCACCACCACCCGCCGCAGCACCACCATCACCA	170825	GS homeobox 2	6.74588	8.48997
ASHGA5P035044	0.0341065	0.0909485	3.34796	down	protein_coding	NM_001122964	CCDS46289.1	SMEK2	RefSeq	4470	chr2	-	55775513	55844796	ATTACAGATATAGTTGGAGTTTCATATGTACCCCTTCACATTCCCATTCCCATTCTACCC	57223	serine/threonine-protein phosphatase 4 regulatory subunit 3B isoform 1	8.5136	10.2569
ASHGA5P047276	0.0304628	0.0842586	3.33699	down	protein_coding	NM_001098844	CCDS41492.1	TMEM236	RefSeq	5464	chr10	+	18041217	18089854	CAATGCATCTCTCTCTTCATCAATCAACGCTGCAGGTGCTTACAAGACTTATAACTTAAA	653567	transmembrane protein 236	3.19401	4.93255
ASHGA5P053110	0.0183483	0.0610231	3.33447	down	protein_coding	ENST00000493151	CCDS44267.1	NOS1AP	GENCODE	5559	chr1	+	162332772	162339813	TGTCCTGTCTTCTCTGCCGCTGCCTCTTCTCTGCAGGTACACTTGCTGAAGGACCAGTTG	9722	nitric oxide synthase 1 (neuronal) adaptor protein [Source:HGNC Symbol;Acc:16859]	7.10684	8.8443
ASHGA5P020595	0.0234833	0.0711976	3.32985	down	protein_coding	NM_001495	CCDS47816.1	GFRA2	RefSeq	3376	chr8	-	21549529	21646346	GATCTTGGCAAACGTCTTCTGCCTCTTCTTCTTTCTAGACGAGACCCTCCGCTCTTTGGC	2675	GDNF family receptor alpha-2 isoform a preproprotein	5.51295	7.2484
ASHGA5P053051	0.00296259	0.0320046	3.32582	down	protein_coding	NM_001100425	CCDS43570.1	KIAA0895	RefSeq	4230	chr7	-	36363758	36429734	TGGGGGCCTAGAGCGGTGGGTCATGGCTGGCTGCACCCGCAAACTCACTCACCTCCGTAA	23366	uncharacterized protein KIAA0895 isoform 1	5.64003	7.37374
ASHGA5P027616	4.81823e-05	0.0121181	3.32365	down	protein_coding	NM_019086	CCDS44992.1	VSIG10	RefSeq	5003	chr12	-	118501397	118541810	AAAGAAATACCTAAGCAGGACCACATTCACAGAGTGACCGCCTTGGTGAATGGGAACATA	54621	V-set and immunoglobulin domain-containing protein 10 precursor	3.30012	5.03288
ASHGA5P013609	0.0152103	0.0547131	3.31872	down	protein_coding	NM_022369	CCDS10261.1	STRA6	RefSeq	2802	chr15	-	74471807	74495220	TTTCATCTCTGCAACTCCTTCCTCCCTGGGCCTCCCTTCTGGAGAAGGGCCAGAGAATGT	64220	stimulated by retinoic acid gene 6 protein homolog isoform a	8.60745	10.3381
ASHGA5P044375	0.00628275	0.0353604	3.31703	down	protein_coding	ENST00000379010		REXO1L1	GENCODE	7032	chr8	-	86568694	86575726	ACTCAGGAAAAGCAACCTAGCTCCAAGTTTAGCAACCGGGAGTTCCAGTTGATTCCATTA	254958	"REX1, RNA exonuclease 1 homolog (S. cerevisiae)-like 1 [Source:HGNC Symbol;Acc:24660]"	4.70703	6.43692
ASHGA5P042179	0.00976995	0.0434309	3.31423	down	protein_coding	NM_144699	CCDS1197.1	ATP1A4	RefSeq	3912	chr1	+	160121351	160156767	TCACTTCTCTTGGGCTATGGTTGGCTGGAGGCTATCATTTTTCTCATTGGCATCATTGTG	480	sodium/potassium-transporting ATPase subunit alpha-4 isoform 1	3.52775	5.25643
ASHGA5P001959	0.00154585	0.0280068	3.30288	down	protein_coding	ENST00000319590	CCDS12821.1	KLK12	GENCODE	1074	chr19	-	51532347	51538148	CACCCACGGAACCCATTCCCGGATCTGCTCCAGTGCCTCAACCTCTCCATCGTCTCCCAT	43849	kallikrein-related peptidase 12 [Source:HGNC Symbol;Acc:6360]	7.53496	9.25869
ASHGA5P055391	0.000770431	0.023569	3.30017	down	protein_coding	NM_181708	CCDS8790.1	BCDIN3D	RefSeq	3266	chr12	-	50229825	50236912	CCATGATTTTGACCACTTCCACTCCCTTGCCATCCGAGGTGACATGCCCAATCAGATTGT	144233	probable methyltransferase BCDIN3D	10.8699	12.5924
ASHGA5P012944	0.0168573	0.0580544	3.292	down	protein_coding	NM_001145841	CCDS53594.1	TNNI2	RefSeq	707	chr11	+	1861431	1862910	TGTCACACACCACACAGCACCATGTCCCAGTGCAAGAAGCGGAACAGGGCCATCACGGCC	7136	"troponin I, fast skeletal muscle isoform 2"	6.11226	7.83122
ASHGA5P026853	4.99619e-05	0.0121181	3.28717	down	protein_coding	ENST00000260264	CCDS8431.1	POU2F3	GENCODE	3013	chr11	+	120110902	120190653	GGGGCGCTGGCTTTGGCCCCGCCTGGGGCAGGATGGTGAATCTGGAGTCCATGCACACAG	25833	POU class 2 homeobox 3 [Source:HGNC Symbol;Acc:19864]	3.16347	4.88031
ASHGA5P035761	0.000629321	0.0232406	3.27929	down	protein_coding	NM_001168241	CCDS54336.1	FAM59B	RefSeq	4173	chr2	+	26395959	26412532	TATTCAAGCCCTCACATCCCCAGAAGCGCTTTGCTCCGTTTGGAGCTCTCAACCCTTTTT	150946	protein FAM59B isoform 1	5.893	7.60639
ASHGA5P014541	0.0305604	0.084437	3.2664	down	protein_coding	NM_001185062	CCDS55096.1	AQP1	RefSeq	2434	chr7	+	30961118	30965131	ATGCAGTCGGGCATGGGGTGGAATGTTCTGGACTTTTGGCTGGCTGATGGTGTGAACTCG	358	aquaporin-1 isoform 4	3.71548	5.42318
ASHGA5P006755	0.0406452	0.102295	3.26485	down	protein_coding	NM_000972	CCDS6965.1	RPL7A	RefSeq	890	chr9	+	136215068	136218280	TTTCTCTCTCCTCCCGCCGCCCAAGATGCCGAAAGGAAAGAAGGCCAAGGGAAAGAAGGT	6130	60S ribosomal protein L7a	8.2391	9.94612
ASHGA5P013401	0.00697615	0.036818	3.25657	down	protein_coding	NM_001170717	CCDS54038.1	BCAR1	RefSeq	3311	chr16	-	75262927	75285526	AGGCTGTGGGGTGTCTGGGTCTACGACGTTCCTCCATCGGTGAGCAAGGATGTGCCCGAT	9564	breast cancer anti-estrogen resistance protein 1 isoform 4	3.9767	5.68005
ASHGA5P007650	0.0285559	0.0809884	3.25068	down	protein_coding	NM_198276	CCDS1871.1	TMEM17	RefSeq	1925	chr2	-	62727355	62733604	ACAGGAGAAGGTTCCTGAGTTGGCTGGCTTTTGGCTTTTGAGCCTTCTATTGCAGTTACC	200728	transmembrane protein 17	4.79038	6.49113
ASHGA5P052700	0.00567059	0.0345083	3.24333	down	protein_coding	ENST00000326199	CCDS4792.1	RPS10	GENCODE	644	chr6	-	34385230	34393902	CGCAGCACCGCGCATGCTCCTTCCTTTCCAGCCCCGGTACCGGACCCTGCAGCCGCAGAG	6204	ribosomal protein S10 [Source:HGNC Symbol;Acc:10383]	6.74656	8.44403
ASHGA5P012103	0.0149356	0.0542054	3.23871	down	protein_coding	ENST00000375741	CCDS45068.1	ARHGEF7	GENCODE	5525	chr13	+	111767623	111947542	GCGGCTGGAGCTCCTGTTTCCTCCTTCCCAGCCTCCTCAGCATCTGGTAACCACCATTCT	8874	Rho guanine nucleotide exchange factor (GEF) 7 [Source:HGNC Symbol;Acc:15607]	7.02083	8.71625
ASHGA5P034690	0.00407356	0.0330909	3.23597	down	protein_coding	NM_014601	CCDS12704.1	EHD2	RefSeq	3601	chr19	+	48216600	48246391	CGTGGACCCGGACAAGCCCTTCCGCAAACTCAACCCTTTCGGAAACACCTTCCTCAACAG	30846	EH domain-containing protein 2	6.19278	7.88698
ASHGA5P039777	0.00589077	0.0347605	3.2239	down	protein_coding	NM_176801	CCDS3364.1	ADD1	RefSeq	4097	chr4	+	2845583	2931802	ACCCTTGCTGCAGTCTCTCTCGTCCGGTGTCTGCGTGCCAAGCTGTATTACCAACTGCTT	118	alpha-adducin isoform d	5.64598	7.33479
ASHGA5P000780	0.00351497	0.0328487	3.21922	down	protein_coding	NM_024074	CCDS12349.1	TMEM38A	RefSeq	1639	chr19	+	16771937	16799816	AAAGCCAGCCTCATCTTCATCTTCACCTTGTTCATGGTGTCCTGTAAGGTGTTTCTGACA	79041	trimeric intracellular cation channel type A	5.03306	6.71977
ASHGA5P008904	0.00338235	0.032685	3.21343	down	protein_coding	NM_001009998	CCDS32960.1	SSBP4	RefSeq	1751	chr19	+	18530145	18545372	CTTCTTCCAGCCCTTCATGTCACCGCGCTTCCCAGGGGGCCCCCGGCCCACCCTGCGGAT	170463	single-stranded DNA-binding protein 4 isoform b	10.0751	11.7592
ASHGA5P015501	0.00182478	0.0290776	3.21097	down	protein_coding	NM_004041	CCDS44684.1	ARRB1	RefSeq	7539	chr11	-	74971165	75062875	TTGCATCCAGCGACGTGGCCGTGGAACTGCCCTTCACCCTAATGCACCCCAAGCCCAAAG	408	beta-arrestin-1 isoform A	8.89142	10.5744
ASHGA5P043635	0.0418019	0.104295	3.20198	down	protein_coding	ENST00000395891	CCDS5469.2	HECW1	GENCODE	6839	chr7	+	43152197	43602938	GTAAGCCAGCTTCCTTCCCTGAGGCCTGAACATCATCACTACCCAACAATCGATGAGCCT	23072	"HECT, C2 and WW domain containing E3 ubiquitin protein ligase 1 [Source:HGNC Symbol;Acc:22195]"	6.12317	7.80213
ASHGA5P016616	0.0050622	0.0338278	3.19716	down	protein_coding	NM_144992	CCDS42718.1	VWA3B	RefSeq	4765	chr2	+	98703594	98929410	CGAGCCCAGGACAGCCCACCTCCACTTCCCCGCGGCCGGGCGTCTAGGACTCAGCAGCCA	200403	von Willebrand factor A domain-containing protein 3B	8.37791	10.0547
ASHGA5P051394	8.92719e-05	0.0145843	3.18839	down	protein_coding	NM_004258	CCDS891.1	CD101	RefSeq	3557	chr1	+	117544371	117579167	TTTCTCTCTCCAAAGATTTTATATTGGTCCCTGGGCCCTTGTATACAGAGCGGTTTGCAG	9398	immunoglobulin superfamily member 2 isoform 1 precursor	3.0731	4.74592
ASHGA5P041465	0.0348531	0.0923403	3.18147	down	protein_coding	NM_014945	CCDS4294.1	ABLIM3	RefSeq	4335	chr5	+	148521053	148639999	TAGCCAGTTAGATGTGAGGTCCTCCACTCCAACCTCTTACCAGGCTCCCAAGCACTTTCA	22885	actin-binding LIM protein 3	6.12057	7.79026
ASHGA5P053032	0.00143841	0.0274621	3.15114	down	protein_coding	NM_001883	CCDS5429.1	CRHR2	RefSeq	2998	chr7	-	30691558	30722141	GCCTGGCGCTGGCTGAAGAGCTGCTCTTGGACGGCTGGGGGCCACCCCTGGACCCCGAGG	1395	corticotropin-releasing factor receptor 2 isoform 1	6.08068	7.73656
ASHGA5P045267	0.00378487	0.0329783	3.14251	down	protein_coding	NM_001099279	CCDS43817.1	FOXD4L2	RefSeq	3109	chr9	-	70426622	70429731	GTGTCCTATATCATATTTATTGTTCAACAAAACACTGCTCCACGGCTTCAATTCAGTTTA	100036519	forkhead box D4-like 2	3.98548	5.6374
ASHGA5P055507	0.00271631	0.0318783	3.14204	down	protein_coding	NM_001013407	CCDS30596.1	PRAMEF5	RefSeq	1855	chr1	-	13108513	13117751	AAGTCTTCAAGCCTGGAGTTCCTGCTTGGTTCTTCCTGAGGACTGAGCACCTTCTAGACT	343068	PRAME family member 5	6.09435	7.74605
ASHGA5P049026	0.00473189	0.0338278	3.14124	down	protein_coding	NM_182687	CCDS45391.1	PKMYT1	RefSeq	2225	chr16	-	3022791	3030540	CCTCCTGCAGGCCTTCACTCTCCCCTGAGGCTGTCCTGGCCCGGACTGTGGGGAGCACCT	9088	membrane-associated tyrosine- and threonine-specific cdc2-inhibitory kinase isoform 2	8.30121	9.95254
ASHGA5P051431	0.0174895	0.0593491	3.13965	down	protein_coding	NM_017897	CCDS2643.1	OXSM	RefSeq	1537	chr3	+	25831562	25836025	GGTGATGCTGATGTGATGGTGGCTGGAGGTACAGATTCTTGTATTAGCCCTTTATCTCTT	54995	"3-oxoacyl-[acyl-carrier-protein] synthase, mitochondrial isoform 1"	3.68111	5.33171
ASHGA5P011702	0.00128577	0.0267336	3.13597	down	protein_coding	NM_198446	CCDS427.2	C1orf122	RefSeq	1359	chr1	+	38273472	38275126	GGTCACGGGGGGAGGCTGCCGGCGTGGACCGCGGGAAGGCGGGGCTGGGGCTCGGCGGGA	127687	uncharacterized protein C1orf122 isoform 1	5.42291	7.07182
ASHGA5P007465	0.00810098	0.0394477	3.13477	down	protein_coding	ENST00000333206	CCDS42427.1	ZSCAN30	GENCODE	4128	chr18	-	32831022	32870196	CAGGAGAGAGATGGCAGGATGGTGGCTGGCAAAGTGTTGATGGCAAAGCAAGAAATTGTT	100101467	zinc finger and SCAN domain containing 30 [Source:HGNC Symbol;Acc:33517]	3.01093	4.65929
ASHGA5P037271	0.000977417	0.0250013	3.13368	down	protein_coding	NM_181619	CCDS13606.1	KRTAP21-1	RefSeq	240	chr21	-	32127456	32127696	ATGGCTCTGGCTCTGGCTACTGTGGCTACCGGCCATTTTGCTTTAGAAGATGCTATTCTT	337977	keratin-associated protein 21-1	4.59417	6.24203
ASHGA5P051178	0.000488877	0.0212828	3.12765	down	protein_coding	NM_031890	CCDS13740.1	CECR6	RefSeq	5043	chr22	-	17597188	17602213	TATCTACTCCATCGCCTTCACTCCCAAGGTGGTGCTGATCCTGGGCACGTCCATCCTAGA	27439	cat eye syndrome critical region protein 6 isoform a	6.23142	7.8765
ASHGA5P037508	0.00345297	0.0328172	3.1257	down	protein_coding	NM_198690	CCDS42961.1	KRTAP10-9	RefSeq	1276	chr21	+	46047039	46048295	ACTGTGTGCCTGTCTGCTGTAAGCCTGTCTGCTGCAAACCCATCTGCTGTGTGCCTGTCT	386676	keratin-associated protein 10-9	5.48129	7.12547
ASHGA5P012818	0.000206093	0.0177921	3.11026	down	protein_coding	NM_005596	CCDS6474.1	NFIB	RefSeq	8285	chr9	-	14081841	14314045	ACCTTCTTATGACCCATCCAGTCCACAAACCAGCCAGTCCTGGTACCTGGGCTAGCTTGG	4781	nuclear factor 1 B-type isoform 3	5.9544	7.59144
ASHGA5P008169	0.000641102	0.0232406	3.10826	down	protein_coding	NM_001114183	CCDS47318.1	GRIA1	RefSeq	5747	chr5	+	152870083	153193429	CTGCCCTGAGAGGTCCCGTAAACCTAGCGGTTTTGAAACTCAGTGAGCAAGGCGTCTTAG	2890	glutamate receptor 1 isoform 2 precursor	3.79761	5.43372
ASHGA5P044196	0.012234	0.0490403	3.1016	down	protein_coding	NM_024025	CCDS6092.1	DUSP26	RefSeq	1665	chr8	-	33448853	33457439	TACCACCACCTTACCCTCGTGGAGGCCATCAAGAAAGTCAAAGACCACCGAGGCATCATC	78986	dual specificity protein phosphatase 26	5.27922	6.91223
ASHGA5P032301	0.0147991	0.0539386	3.09742	down	protein_coding	NM_173854	CCDS30988.1	SLC41A1	RefSeq	4869	chr1	-	205758220	205782161	TTTTCCATCGGGCTGCAAGTACTGTTTCCATTCCTCCTGGCAGGCTTTGGGACCGTGGCT	254428	solute carrier family 41 member 1	6.56731	8.19837
ASHGA5P004158	0.0196151	0.0635557	3.09736	down	protein_coding	NM_000827	CCDS4322.1	GRIA1	RefSeq	5747	chr5	+	152870083	153193429	CTGCCCTGAGAAATCCAGTAAACCTGGCAGTGTTAAAACTGAACGAGCAGGGGCTTTTGG	2890	glutamate receptor 1 isoform 1 precursor	5.42569	7.05673
ASHGA5P055083	0.020438	0.0654095	3.09574	down	protein_coding	NM_020179	CCDS8292.1	C11orf75	RefSeq	979	chr11	-	93211638	93276546	CCCACCATCACCGAGTGAGCCCCGCAGCCGGCTGCGGACCCCATCGGCAGGGAGAGGAGG	56935	UPF0443 protein C11orf75	5.93103	7.56131
ASHGA5P050617	0.00272346	0.0318783	3.09494	down	protein_coding	ENST00000439055	CCDS46389.1	ACOXL	GENCODE	2373	chr2	+	111490149	111875799	GGTGATCTCGACCTTTAACATTCCACACACCTACCTCCACGCACCAATCGCCGGAATCTC	55289	acyl-CoA oxidase-like [Source:HGNC Symbol;Acc:25621]	6.63839	8.2683
ASHGA5P002300	0.0134111	0.0514937	3.09189	down	protein_coding	NM_001423	CCDS8660.1	EMP1	RefSeq	2804	chr12	+	13349601	13369708	CTGGTGTGCTGGCTGTGCATTCTTGTGGGGGTGTCCATCTACACTAGTCATTATGCGAAT	2012	epithelial membrane protein 1	5.55598	7.18447
ASHGA5P006241	0.00715568	0.037284	3.091	down	protein_coding	ENST00000316097	CCDS45903.1	SCAMP4	GENCODE	2526	chr19	+	1905372	1926012	GGGGCGCGTGCGGCTGGCTGTCGGCAATTGGATTCTTCCAGTACAGCCCGGGCGCTGCCG	113178	secretory carrier membrane protein 4 [Source:HGNC Symbol;Acc:30385]	3.31999	4.94807
ASHGA5P027305	0.000285454	0.0187505	3.0893	down	protein_coding	NM_002272	CCDS41787.1	KRT4	RefSeq	2147	chr12	-	53200326	53207900	ACTGGTGGCTTTGGTGGTGGATTTGGGGGCTCCTTCAGTGGTAAGGGTGGCCCTGGCTTC	3851	"keratin, type II cytoskeletal 4"	5.35152	6.9788
ASHGA5P002338	0.00180408	0.0290776	3.0865	down	protein_coding	NM_001099415	CCDS47617.1	POM121C	RefSeq	5863	chr7	-	75046064	75115568	TTGGACCGTTCGGATCGGCGGCCCCTTCATTTTCCATTGGTGCGGGATCCAAGACCCCAG	100101267	nuclear envelope pore membrane protein POM 121C	6.14291	7.76888
ASHGA5P007388	0.00943503	0.0425098	3.08276	down	protein_coding	NM_017596	CCDS30965.1	KIF21B	RefSeq	9916	chr1	-	200938513	200992828	TCTTCTCTCGTCTCACCAGTAATCAGAGCCAGGGGTCAGCGCTGGACAAGGGCATCATCT	23046	kinesin-like protein KIF21B isoform 2	2.99196	4.61618
ASHGA5P055180	0.00597648	0.0347809	3.07424	down	protein_coding	NM_001164277		SLC37A4	RefSeq	2621	chr11	-	118895060	118901616	GTCTTGGCTGGTAGGGCCTGCTCTTTTCTACCATGGCAGCCCAGGGCTATGGCTATTATC	2542	glucose-6-phosphate translocase isoform 1	5.0076	6.62783
ASHGA5P038353	0.00455019	0.033633	3.07411	down	protein_coding	ENST00000478945	CCDS2956.1	DPPA2	GENCODE	1383	chr3	-	109012634	109035364	ATGAGCAATTTACAGCTCCACAAAAAGCTAGATGCAAAATACCAGCCCTTCCCTTGCCGA	151871	developmental pluripotency associated 2 [Source:HGNC Symbol;Acc:19197]	7.66019	9.28036
ASHGA5P052342	0.0113838	0.0470912	3.06749	down	protein_coding	NM_183001	CCDS30881.1	SHC1	RefSeq	3493	chr1	-	154934773	154943223	AGTACAATCCACTCCGGAATGAGTCTCTGTCATCGCTGGAGGAAGGGGCTTCTGGGTCCA	6464	SHC-transforming protein 1 isoform 1	6.39624	8.0133
ASHGA5P008743	0.0420944	0.104922	3.06438	down	protein_coding	ENST00000346541	CCDS13221.1	CBFA2T2	GENCODE	7737	chr20	+	32150170	32237837	AAGCTTGAAAGAAATACAGGTCCTGGCAAGGCAATGGAAAGTTGGTCCTGAGAAAAGGGT	9139	"core-binding factor, runt domain, alpha subunit 2; translocated to, 2 [Source:HGNC Symbol;Acc:1536]"	3.04366	4.65926
ASHGA5P004541	0.0449014	0.109691	3.06093	down	protein_coding	NM_152492	CCDS50.1	CCDC27	RefSeq	2174	chr1	+	3668964	3688209	GAACGTGGACGGGTACCTCCTTCCCTTCAGTAAGAGCATCTGCGAGTTCGATTACTTGCG	148870	coiled-coil domain-containing protein 27	5.63283	7.2468
ASHGA5P008889	0.00400549	0.0330479	3.05548	down	protein_coding	NM_001111033	CCDS46432.1	ACVR1C	RefSeq	8421	chr2	-	158383278	158485399	CTTCCAACAGATAATGGAACTTGGACTCAACTTTGGCTGGTATCTGAATATCATGAACAG	130399	activin receptor type-1C isoform 4 precursor	3.08112	4.69252
ASHGA5P041787	0.00185251	0.0290776	3.05478	down	protein_coding	NM_001141969	CCDS4776.1	DAXX	RefSeq	2632	chr6	-	33286334	33290793	TGAAATCCCCACCACTTCCTCCCTCCGGGGGATTTGATCCCCTATGGCCACCGCTAACAG	1616	death domain-associated protein 6 isoform a	8.11649	9.72756
ASHGA5P010997	0.00900885	0.0415451	3.05386	down	protein_coding	NM_005978	CCDS1044.1	S100A2	RefSeq	970	chr1	-	153533584	153538306	TTCCTGGGTCTGTCTCTGCCACCTGGTCTGCCACAGATCCATGATGTGCAGTTCTCTGGA	6273	protein S100-A2	5.99631	7.60694
ASHGA5P053045	0.0120172	0.048386	3.05356	down	protein_coding	NM_001077473	CCDS53411.1	NR1I3	RefSeq	1120	chr1	-	161199455	161208000	TTTTTGGAGTTGCTCTTTCACTTCCATGGAACACTACGAAAACTGCAGCTCCAAGAGCCT	9970	nuclear receptor subfamily 1 group I member 3 isoform 12	4.79215	6.40265
ASHGA5P055256	0.0125737	0.0496272	3.04878	down	protein_coding	NM_017417	CCDS8533.1	GALNT8	RefSeq	2135	chr12	+	4829751	4881892	TACCTGAAAAATGTTTATCCACTCTTGAAGCCACTCCACACCATCGTGGGCTATGGAAGA	26290	probable polypeptide N-acetylgalactosaminyltransferase 8	6.64611	8.25435
ASHGA5P029461	0.0150649	0.0544699	3.04672	down	protein_coding	ENST00000408907	CCDS41923.1	PSMB11	GENCODE	1894	chr14	+	23511375	23513269	CTTATCTGCTCTCCTTCTCTGACTTGACCATCATGACTAGAATGATTATCCCTTTACTGA	122706	"proteasome (prosome, macropain) subunit, beta type, 11 [Source:HGNC Symbol;Acc:31963]"	5.16968	6.77693
ASHGA5P046724	0.0403277	0.101961	3.02969	down	protein_coding	NM_014370	CCDS35441.1	SRPK3	RefSeq	2014	chrX	+	153046455	153051187	CCTCTTCCTCCCCCGCCCCAGGGGGCGGCCGTAGCCTCAGCGCGGGCTCACAGACCTCAG	26576	SRSF protein kinase 3 isoform 1	7.87337	9.47254
ASHGA5P051543	0.00447395	0.0335708	3.02021	down	protein_coding	NM_032750	CCDS2842.1	ABHD14B	RefSeq	2447	chr3	-	52002525	52008646	TTTGAACCACAGGCCCTTCACCAGCACAGCAGCAGCAGGCATGGCAGCAAGCGTGGAGCA	84836	abhydrolase domain-containing protein 14B isoform 1	6.1812	7.77585
ASHGA5P006191	0.000870429	0.0244068	3.01217	down	protein_coding	NM_033425		DIXDC1	RefSeq	5432	chr11	+	111848032	111893307	AAGTCAAATGCCTGACTTCACCCAGTCCAATCCACAGTGCAAAGAGCGAGTCCATTATAA	85458	dixin isoform b	4.72048	6.31128
ASHGA5P037507	0.0265657	0.0771671	3.01067	down	protein_coding	ENST00000334662	CCDS13713.1	KRTAP10-8	GENCODE	876	chr21	+	46031995	46032871	TGCTGTGTGCCTGTCTGCTCTGGGGCTTCCTCTCTGTGCTGCCAGAAGTCTAGCTGCCAG	386681	keratin associated protein 10-8 [Source:HGNC Symbol;Acc:20525]	6.91889	8.50897
ASHGA5P051638	0.0110616	0.046353	3.00783	down	protein_coding	NM_005213	CCDS3011.1	CSTA	RefSeq	838	chr3	+	122044010	122060815	ACACTTCCCTGTTCACTTTGGTTCCAGCATCCTGTCCAGCAAAGAAGCAATCAGCCAAAA	1475	cystatin-A	5.67303	7.26175
ASHGA5P034076	0.00502777	0.0338278	3.00385	down	protein_coding	ENST00000315576	CCDS32935.1	EMR2	GENCODE	6771	chr19	-	14843204	14889353	AAACCCATGCCACAGCTCCACCCACTGCCTCAACAACGTGGGCAGCTATCAGTGCCGCTG	30817	"egf-like module containing, mucin-like, hormone receptor-like 2 [Source:HGNC Symbol;Acc:3337]"	6.74328	8.33009
ASHGA5P010712	0.0269287	0.0778661	3.00297	down	protein_coding	NM_001164688	CCDS1498.1	RD3	RefSeq	4287	chr1	-	211649863	211666259	TGTCTGCGTTAAGATCCACCCATCCTATTGTGGGCCTGCTATCCTCAGGTTCCGGCAGCT	343035	protein RD3	5.14926	6.73565
ASHGA5P050550	0.0118704	0.0480619	3.00224	down	protein_coding	ENST00000340326	CCDS1976.1	SH2D6	GENCODE	894	chr2	+	85661917	85664152	CTTCTTCTAGAAGGAAGGAAATCGTCTCTTCCCTCTGTAGCCCCCACTGGGAGTGCCTCA	284948	SH2 domain containing 6 [Source:HGNC Symbol;Acc:30439]	10.9794	12.5655
ASHGA5P012311	0.0178327	0.0600648	2.98409	down	protein_coding	ENST00000377095	CCDS45700.1	SLC25A39	GENCODE	1610	chr17	-	42396992	42402217	TATACCAAATTGCCCTCCTCTCTCCAATCCACAGGGAAGTGCCTCCTGTATTGCAATGGT	51629	"solute carrier family 25, member 39 [Source:HGNC Symbol;Acc:24279]"	6.81616	8.39345
ASHGA5P005373	0.0356149	0.0937733	2.98247	down	protein_coding	NM_000287	CCDS4877.1	PEX6	RefSeq	3514	chr6	-	42931610	42946981	GCCTTACCTTCCTCAGCGTGAAGGGGCCAGAGCTCATTAACATGTATGTGGGCCAAAGTG	5190	peroxisome biogenesis factor 6	3.277	4.85351
ASHGA5P042701	0.00184868	0.0290776	2.97057	down	protein_coding	NM_001008505	CCDS43518.1	OPRM1	RefSeq	1652	chr6	+	154360442	154414655	TGAGTTAAGCATGATTATTCTTCAGTTGCCCGACACTGCCCTTGACTCCCTTCCAAATTC	4988	mu-type opioid receptor isoform MOR-1X	7.77038	9.34112
ASHGA5P039820	0.00359747	0.0329783	2.95857	down	protein_coding	NM_001256855		LOC100287238	RefSeq	1593	chr4	+	9226621	9228214	GAAAGAGCCACTCAGGAAAGCACCTTAGACCGCTGGAAATTCCTTCAAGAGCAAAACAAA	100287238	ubiquitin carboxyl-terminal hydrolase 17-like	3.85691	5.42181
ASHGA5P008205	0.00443147	0.0334484	2.95589	down	protein_coding	NM_001005911	CCDS33752.1	IP6K2	RefSeq	1254	chr3	-	48730883	48754711	CAGTACAAAGGACAAAGCCAAAGGCCCCTTGTTAGCTGGCCATCCCTGCCCCATTTTTTC	51447	inositol hexakisphosphate kinase 2 isoform b	7.34414	8.90773
ASHGA5P038786	0.0167979	0.0579479	2.95304	down	protein_coding	NM_003278	CCDS2726.1	CLEC3B	RefSeq	886	chr3	+	45067758	45077563	CCCAGGTCACCACCGAGCCACCAACCCAGAAGCCCAAGAAGATTGTAAATGCCAAGAAAG	7123	tetranectin precursor	5.90291	7.46511
ASHGA5P056132	0.0208709	0.0663169	2.95029	down	protein_coding	NM_024734	CCDS9933.1	CLMN	RefSeq	12750	chr14	-	95648275	95786245	GGACTTTGCGGGCAGTTGGAGGAGTGGGCTGGCTTTCCTGGCGGTGATCAAGGCCATTGA	79789	calmin	5.02765	6.58851
ASHGA5P028084	0.00433291	0.0334484	2.94954	down	protein_coding	NM_052897	CCDS8944.1	MBD6	RefSeq	4214	chr12	+	57916658	57923931	GCCCTTCCCACTCTGATGGAAGCTTTAACCTTTTGGGGTCAGATGCACACCTTCCTCCTC	114785	methyl-CpG-binding domain protein 6	5.61965	7.18014
ASHGA5P049193	0.0136023	0.05182	2.94657	down	protein_coding	NM_001099687	CCDS45477.1	TP53TG3B	RefSeq	1447	chr16	-	32684848	32687448	TGATTTATTTTTCCAACCCATCTAATTCTTCTGTCTCTCTCCTCTCCTCAGGCTCAATAA	729355	TP53-target gene 3 protein isoform 1	7.17117	8.7302
ASHGA5P049392	0.00948212	0.0426842	2.94614	down	protein_coding	ENST00000325921	CCDS10993.1	PRDM7	GENCODE	2442	chr16	-	90122973	90128733	AATCCCTGCTTCCCTCACTTCCAGATTGTGAGATGTGTCAGAACTTCTTCATTGACAGCT	11105	PR domain containing 7 [Source:HGNC Symbol;Acc:9351]	6.47615	8.03498
ASHGA5P016819	0.000305831	0.0187505	2.93569	down	protein_coding	ENST00000434608	CCDS2696.1	CCK	GENCODE	747	chr3	-	42299317	42305439	TGAGGAGTTCCCAAAGACCAGCCAGCCATGAACAGCGGCGTGTGCCTGTGCGTGCTGATG	885	cholecystokinin [Source:HGNC Symbol;Acc:1569]	3.76307	5.31677
ASHGA5P050794	0.00750381	0.0380335	2.93514	down	protein_coding	NM_212476	CCDS42813.1	FN1	RefSeq	8272	chr2	-	216225178	216300791	TGCCTCTACAGGACAAGAAGCTCTCTCTCAGACAACCATCTCATGGGCCCCATTCCAGGA	2335	fibronectin isoform 5 preproprotein	4.70049	6.25392
ASHGA5P012675	0.0201459	0.0647402	2.92851	down	protein_coding	NM_001184836	CCDS55376.1	GPR64	RefSeq	4823	chrX	-	19007424	19140755	TAATTCCAGTTTGTCACCACCACCTGATGTTACTTTAAGCTTACTCCCTTCAAACGAAAC	10149	G-protein coupled receptor 64 isoform 8 precursor	5.2366	6.78677
ASHGA5P055467	0.00922543	0.0420596	2.92605	down	protein_coding	ENST00000317269	CCDS8894.1	DNAJC14	GENCODE	3330	chr12	-	56214743	56223420	GCGGAAGAAAGTGAGGAGGCCCTTCCAACGTTGATGCCCCTTCTCTTTCCTCAAATCAAT	85406	"DnaJ (Hsp40) homolog, subfamily C, member 14 [Source:HGNC Symbol;Acc:24581]"	6.57184	8.12079
ASHGA5P007882	0.0113488	0.0470342	2.92357	down	protein_coding	NM_014836	CCDS7261.1	RHOBTB1	RefSeq	4515	chr10	-	62629197	62704033	GTGTTCTGTTCTTCACTTCCAGCAAGCCAGAGTTTCATAAATGGACGCTGACATGGACTA	9886	rho-related BTB domain-containing protein 1	3.91215	5.45988
ASHGA5P015485	0.0391984	0.100004	2.92157	down	protein_coding	NM_001164315	CCDS54379.1	ANKRD36	RefSeq	6269	chr2	+	97779232	97930257	AGAAGAGAAATTCACTTCCCTAAATAAATCAGCGGGGGTGTCTCCTCAGAAACAATCGGC	375248	ankyrin repeat domain-containing protein 36A	6.53298	8.07972
ASHGA5P034960	0.0361279	0.0948543	2.91758	down	protein_coding	NM_001145122	CCDS46254.1	CAPN14	RefSeq	3841	chr2	-	31395921	31440411	TGTCTCCTCCACCTATAAGAACTTGTTCTGGGGAGCACTTCTGGAAAAGGCCTATGCCAA	440854	calpain-14	3.10165	4.64642
ASHGA5P012035	0.0141679	0.0528436	2.91729	down	protein_coding	NM_153695	CCDS6718.1	ZNF367	RefSeq	3714	chr9	-	99148224	99180669	GGCTGGCGAGGTATTGGGAAATGAGAGAGCAGCGCACCCCCACTTTGAAAGGCAAGCTGG	195828	zinc finger protein 367	7.03034	8.57497
ASHGA5P052062	0.0320079	0.0870433	2.9036	down	protein_coding	NM_015312	CCDS43267.1	KIAA1109	RefSeq	15592	chr4	+	123091757	123283914	AAGCTGTATGGTATGAAAGATAGTGCAACATCTCCTCCTTCTCCTCCTTTACCTTCCACT	84162	uncharacterized protein KIAA1109	7.73314	9.27099
ASHGA5P021830	0.00174943	0.0289426	2.90219	down	protein_coding	ENST00000545060	CCDS54099.1	SLC13A2	GENCODE	2226	chr17	+	26800663	26824796	TCGTCCCCAGTAAGGTTGCCGTCGAGTATCTTAAGGACTCCAACCTCCTGTTCTTCGGGG	9058	"solute carrier family 13 (sodium-dependent dicarboxylate transporter), member 2 [Source:HGNC Symbol;Acc:10917]"	4.90278	6.43993
ASHGA5P051856	0.0037803	0.0329783	2.89939	down	protein_coding	ENST00000330198	CCDS3332.1	LMLN	GENCODE	7043	chr3	+	197687070	197770591	GCTGGAGCGGGTCTGTGTGGGTCCGAAGCGTTTTACTCCTGTTGGGCGGGCTCCGGGCCA	89782	leishmanolysin-like (metallopeptidase M8 family) [Source:HGNC Symbol;Acc:15991]	3.17621	4.71196
ASHGA5P008483	0.0127777	0.0500514	2.88925	down	protein_coding	NM_001130021	CCDS45684.1	ATP6V0A1	RefSeq	4205	chr17	+	40610861	40674597	TCAGCATGACCAGCTCTCCACCCACTCAGAGGACGCAGACGAGCCTTCCGAGGACGAAGT	535	V-type proton ATPase 116 kDa subunit a isoform 1 isoform b	6.43634	7.96704
ASHGA5P052549	0.0287494	0.0812569	2.88899	down	protein_coding	NM_203297	CCDS43414.1	TRIM7	RefSeq	3026	chr5	-	180620923	180627930	TCAAGTCCCTCTCCAACTTCTCCTCCTGGGACAGAAACAGATGGCAGCGGAGCAGGAGAA	81786	tripartite motif-containing protein 7 isoform 2	5.62228	7.15285
ASHGA5P001960	0.00174904	0.0289426	2.87454	down	protein_coding	NM_019598	CCDS12820.1	KLK12	RefSeq	945	chr19	-	51532347	51538148	TATATTTGCAACTCCACTCTTGTTGGCCTGGGAACTTCTTGGAACTTTAACTCCTGCCAG	43849	kallikrein-12 isoform 1 precursor	6.65377	8.1771
ASHGA5P051097	0.00202022	0.0300295	2.87058	down	protein_coding	NM_181605		KRTAP6-3	RefSeq	616	chr21	+	31964758	31965374	CTGTGGCTATGGCTGTGGCTATGGCTATGTCTCCCACTCCTTCTGTGGCTGTGGCTATAG	337968	keratin-associated protein 6-3	5.08542	6.60675
ASHGA5P020842	0.0135285	0.0516452	2.86984	down	protein_coding	NM_001161780	CCDS55262.1	PDP1	RefSeq	4247	chr8	+	94929161	94938296	ATCGTTTGGTCTCCTGCCGTGCCCGGAGAATGTGTGTGTGTCCCGGGCCCAGACGAATTG	54704	pyruvate dehyrogenase phosphatase catalytic subunit 1 isoform 2	5.03376	6.55473
ASHGA5P041421	0.00983299	0.0435895	2.86686	down	protein_coding	NM_031860	CCDS34255.1	PCDHA10	RefSeq	4465	chr5	+	140235633	140391929	AATTCACCTGAGGTGATTGTCACTTCTCTGTCTCTCCCAGTGAAAGAAGATGCTCAAGTG	56139	protocadherin alpha-10 isoform 3 precursor	6.14405	7.66353
ASHGA5P008722	0.000139583	0.0146723	2.86658	down	protein_coding	NM_016156	CCDS8305.1	MTMR2	RefSeq	4603	chr11	-	95566043	95657371	CCTTGTCCAGTGCCTCCACTTCTCATTCAGAGAATTCAGTGCATACAAAATCAGCTTCTG	8898	myotubularin-related protein 2 isoform 1	5.05408	6.57341
ASHGA5P008338	0.00293866	0.0319884	2.86632	down	protein_coding	NM_001077395	CCDS41359.1	DPH5	RefSeq	1807	chr1	-	101455179	101491362	GAACTACCTACGATTCTCTCAGCGGTCTCTCTTCTCCTCAAGTTTGAAATGCTTTATCTC	51611	diphthine synthase isoform b	5.44919	6.9684
ASHGA5P048194	0.00271968	0.0318783	2.86378	down	protein_coding	ENST00000301894	CCDS8078.1	NRXN2	GENCODE	3535	chr11	-	64373645	64410787	CGAGGGGGCCCGGGTCTCCTCCAGCCTCAGCACCACCCACCACGTCCACCACTTCCACAG	9379	neurexin 2 [Source:HGNC Symbol;Acc:8009]	7.18624	8.70416
ASHGA5P032669	0.00587299	0.0347584	2.86223	down	protein_coding	NM_001008529	CCDS32746.1	MXRA7	RefSeq	1936	chr17	-	74675650	74707056	CACTTCCCTGTAGCAAGTTCCTTAGGTCCTGAGCCACAAATATTCTTGCAAATCCTTTTG	439921	matrix-remodeling-associated protein 7 isoform 2 precursor	5.43913	6.95627
ASHGA5P007939	0.0234457	0.0711049	2.86206	down	protein_coding	NM_006981	CCDS6743.1	NR4A3	RefSeq	5635	chr9	+	102584136	102629173	AAGATACCCTCCAGATATGCCCTGCGTCCAAGCCCAATATAGCCCTTCCCCTCCAGGTTC	8013	nuclear receptor subfamily 4 group A member 3 isoform a	8.90932	10.4264
ASHGA5P013072	0.00740887	0.0377978	2.86059	down	protein_coding	NM_001085451	CCDS43120.1	LNP1	RefSeq	2233	chr3	+	100120036	100175170	CTGCCCTGCCCACTTCCTGTGCTTCCCAGAATTCCATCATCTGACTGCCATCCTAGAAGG	348801	leukemia NUP98 fusion partner 1	11.752	13.2683
ASHGA5P008166	0.0185001	0.0613614	2.85789	down	protein_coding	NM_001184837	CCDS55377.1	GPR64	RefSeq	4805	chrX	-	19007424	19140755	AAGATACTGATAATTCCAGTTTGTCACCACCACCTGAGGTTGAAACAACAAGCCTCAATG	10149	G-protein coupled receptor 64 isoform 9 precursor	4.43205	5.947
ASHGA5P012952	0.00664697	0.0360365	2.85751	down	protein_coding	NM_138567	CCDS7726.2	SYT8	RefSeq	1423	chr11	+	1855673	1858750	ATGGCTGGCAAACCATGCAGGGTAGAAAGATGGGGCACCCACCAGTCTCTCCCAGTGCCC	90019	synaptotagmin-8	5.26289	6.77764
ASHGA5P011706	0.0164813	0.0572791	2.84848	down	protein_coding	ENST00000373063	CCDS4856.1	FOXP4	GENCODE	5910	chr6	+	41514163	41570122	TTCAGCCAGCCAGTGACCGTCTCTGCAGCAGACTCATTCCCAGATGGTCTCGTGCACCCC	116113	forkhead box P4 [Source:HGNC Symbol;Acc:20842]	4.57788	6.08807
ASHGA5P011574	0.00274072	0.0318783	2.8455	down	protein_coding	ENST00000372264	CCDS6942.1	PPAPDC3	GENCODE	2095	chr9	+	134165080	134184649	CTGCTCCTGGCCCTGCTCCTGGACATCATGACGGTGGCCGGCGTGCAGAAGCTCATCAAG	84814	phosphatidic acid phosphatase type 2 domain containing 3 [Source:HGNC Symbol;Acc:28174]	6.7213	8.22999
ASHGA5P053046	0.0133865	0.0514403	2.84352	down	protein_coding	NM_001077477	CCDS53408.1	NR1I3	RefSeq	1093	chr1	-	161199455	161208000	GTTCCAGGTAGAGTTTTTGGAGTTGCTCTTTCACTTCCATGGAACACTACGAAAACTGCA	9970	nuclear receptor subfamily 1 group I member 3 isoform 14	4.72099	6.22867
ASHGA5P009686	0.0224813	0.0694621	2.84173	down	protein_coding	NM_001079858	CCDS43923.1	GPR64	RefSeq	4895	chrX	-	19007424	19140755	TGATAATTCCAGTTTGTCACCACCACCTGCTAAATTATCTGTTGTCAGTTTTGCCCCCTC	10149	G-protein coupled receptor 64 isoform 1 precursor	5.23728	6.74405
ASHGA5P043857	0.0155793	0.05555	2.83945	down	protein_coding	ENST00000358184	CCDS1462.1	CTSE	GENCODE	2228	chr1	+	206317458	206332104	TTCCCTCATCACTGGCCCTTCCGACAAGATTAAGCAGCTGCAAAACGCCATTGGGGCAGC	1510	cathepsin E [Source:HGNC Symbol;Acc:2530]	7.14812	8.65373
ASHGA5P034251	0.00153104	0.0279696	2.83903	down	protein_coding	ENST00000221538	CCDS12675.1	RSPH6A	GENCODE	2484	chr19	-	46298967	46318605	ATAAGGGATGACCCTGCCCTTCAGTTCTTGCCCTCTGAGCTGGGCTTCCCACACTACAGT	81492	radial spoke head 6 homolog A (Chlamydomonas) [Source:HGNC Symbol;Acc:14241]	6.32761	7.833
ASHGA5P011325	0.0148888	0.0541494	2.83211	down	protein_coding	NM_007131	CCDS14648.1	ZNF75D	RefSeq	3293	chrX	-	134419722	134429965	TATGAAAGAGCTGTGCATGATCAACAGATGTTAGCCCTTTCTGAGCAGAAAAGAATCAAA	7626	zinc finger protein 75D isoform 1	4.70895	6.21083
ASHGA5P037983	0.0130816	0.0507281	2.83121	down	protein_coding	NM_033386	CCDS13961.1	MICALL1	RefSeq	4495	chr22	+	38302154	38338465	ATCACGCTGGTGCAGGCAGAACCAAAGAAGAAGCCAGCCCCACTTCCCCCAAGCAGCAGC	85377	MICAL-like protein 1	8.11958	9.621
ASHGA5P050952	0.0131243	0.0507563	2.83092	down	protein_coding	NM_001083537		FAM86B1	RefSeq	2458	chr8	-	12039612	12051624	GGACTTGAGACCCTTCACAACCCCCCTCACTTGGACTTGAGACCCTTCACAACCCAGCAG	85002	protein FAM86B1	13.0631	14.5644
ASHGA5P010914	0.00512143	0.0338278	2.81464	down	protein_coding	NM_001042586	CCDS41420.1	CD1E	RefSeq	1514	chr1	+	158323485	158327343	TGTTCCTCCTCTTCGAGGGTCTCTGCTGTCCTGGGGAAAATACAGCAGTGAAGCCAGAGG	913	"T-cell surface glycoprotein CD1e, membrane-associated isoform e precursor"	3.87216	5.36511
ASHGA5P052845	0.00098415	0.0250013	2.81227	down	protein_coding	NM_001185107	CCDS53385.1	CD1E	RefSeq	1847	chr1	+	158323485	158327343	ACACACCCAGCCCTGTCTTTCTCATGGGAGCCAACACTCAGGACACCAAGAATTCAAGAC	913	"T-cell surface glycoprotein CD1e, membrane-associated isoform g precursor"	6.64329	8.13503
ASHGA5P008184	0.00377485	0.0329783	2.80907	down	protein_coding	NM_133499	CCDS35233.1	SYN1	RefSeq	3172	chrX	-	47431299	47479256	CCCAGCTCAAAGCCAGCCCCGCCCAGGCCCAGCCTTAGCCAGGACGAGGTGAAAGCTGAG	6853	synapsin-1 isoform Ib	7.66057	9.15067
ASHGA5P014043	0.0168268	0.0580062	2.80798	down	protein_coding	NM_080798	CCDS44427.2	COL13A1	RefSeq	2921	chr10	+	71561643	71718904	GGACAAGCAGGCTCACCGGTTCCTGGGCTGCCAGGGCCAGAGGGGCCTCCCGGACCTCCG	1305	collagen alpha-1(XIII) chain isoform 21	5.79306	7.2826
ASHGA5P040443	0.0319406	0.0869593	2.80273	down	protein_coding	NM_007036	CCDS3963.1	ESM1	RefSeq	2089	chr5	-	54273694	54281414	AATTCCCCTTCTTCCAATATTCAGTAACCAAGTCTTCCAACAGATTTGTTTCTCTCACGG	11082	endothelial cell-specific molecule 1 isoform a precursor	4.69345	6.18028
ASHGA5P049467	0.00583924	0.0347584	2.80228	down	protein_coding	NM_004422	CCDS11091.1	DVL2	RefSeq	3046	chr17	-	7128660	7137863	GGCCCTCCTCCATCCAGAGGCTCAACTGGGGGTGCCCCTAATCTCCGAGCCCACCCAGGG	1856	segment polarity protein dishevelled homolog DVL-2	7.66474	9.15134
ASHGA5P003792	0.00459132	0.0338147	2.78135	down	protein_coding	NM_207006	CCDS6339.1	FAM83A	RefSeq	2058	chr8	+	124194751	124222318	CCGCTCGGCAGGCAGCCACCCCGTTCCTGAAAGTAAACAAAACAAAACAAAAACAAAAAA	84985	protein FAM83A isoform b	6.29645	7.77224
ASHGA5P006752	0.0128233	0.0501464	2.77629	down	protein_coding	NM_017871	CCDS21.1	CPSF3L	RefSeq	2168	chr1	-	1246964	1260067	TCCACCTCCACCAGACGGTCCAGGTAGATGATGAGCTGGAGATCAAGGCCTACTATGCAG	54973	integrator complex subunit 11 isoform 2	5.0254	6.49855
ASHGA5P051629	0.00122494	0.026401	2.7718	down	protein_coding	ENST00000315843	CCDS2997.1	GPR156	GENCODE	4193	chr3	-	119884327	119963142	ATGACGTGGGTGCTGACTGATCCCATCCAGTGCCTCCAGATTCTCAGTGTCAGTATGACG	165829	G protein-coupled receptor 156 [Source:HGNC Symbol;Acc:20844]	3.97567	5.44649
ASHGA5P007670	0.0170554	0.0584602	2.76292	down	protein_coding	ENST00000458694	CCDS34449.1	PRICKLE4	GENCODE	1646	chr6	+	41748499	41755110	AAGGAAGCAGGCTTTGCCACAAATGTCAGTGCAGAACTCTGGCTGGCCCCACCAAGAAGA	29964	prickle homolog 4 (Drosophila) [Source:HGNC Symbol;Acc:16805]	8.19991	9.6661
ASHGA5P013647	0.0201031	0.0646435	2.76241	down	protein_coding	NM_001030288	CCDS10650.1	SPN	RefSeq	6944	chr16	+	29674270	29681823	TGCCTCCCTCAGGTCCCAGCTCTTGCTCCTGCCTGTTTGCCTGGAAATGGCCACGCTTCT	6693	leukosialin precursor	7.64458	9.11051
ASHGA5P034408	0.00769897	0.0385447	2.75219	down	protein_coding	NM_001242901		LOC100131094	RefSeq	3071	chr19	+	4679293	4685960	ACAGATGGGGGCAGAGAGAGAGAGAGAAACAGGCGTCGGGTCCTACAGCCAGCATCAGCC	100131094	uncharacterized protein LOC100131094	6.36332	7.8239
ASHGA5P046543	0.00230136	0.0309287	2.75004	down	protein_coding	NM_175698	CCDS14344.1	SSX2	RefSeq	1322	chrX	+	52780307	52790617	TCTGAGTGTTTAATTTCAGATTTTTTCCTCTGCATTTACACACACACGCACACAAACCAC	6757	protein SSX2 isoform b	5.07673	6.53618
ASHGA5P055869	0.0104596	0.0449396	2.74742	down	protein_coding	NM_080687	CCDS9544.1	UPF3A	RefSeq	2303	chr13	+	115047058	115071291	GAGGTTTCGTCGGGGGCTGGCGGCTGCGGCTCGGCGGAGAGTGCGGCATGCGCTCGGAAA	65110	regulator of nonsense transcripts 3A isoform hUpf3pdelta	4.86344	6.32151
ASHGA5P054884	0.0364409	0.0952956	2.74615	down	protein_coding	NM_145017	CCDS8008.1	PPP1R32	RefSeq	1558	chr11	+	61248584	61258400	GCCCTCCTCCCAGGCCAGAGTGTCACCAAGTCAGACTTCCTCCCCAAGACTCACCTACAT	220004	protein phosphatase 1 regulatory subunit 32 isoform 1	9.04746	10.5049
ASHGA5P009432	0.00698184	0.036818	2.74353	down	protein_coding	NM_153427	CCDS3693.1	PITX2	RefSeq	3110	chr4	-	111538579	111563279	CTGGTGTCGGCGTGTGTGCAATTAGAGAAAGATAAAAGCCAGCAGGGGAAGAATGAGGAC	5308	pituitary homeobox 2 isoform a	3.66984	5.12587
ASHGA5P010693	0.0422805	0.105308	2.74132	down	protein_coding	NM_001135599	CCDS44318.1	TGFB2	RefSeq	5966	chr1	+	218518675	218617961	TACAAAATAGACATGCCGCCCTTCTTCCCCTCCGAAACTGTCTGCCCAGTTGTTACAACA	7042	transforming growth factor beta-2 isoform 1 precursor	9.36311	10.818
ASHGA5P019342	0.0124839	0.0495527	2.73833	down	protein_coding	NM_001170752	CCDS55402.1	SRPX	RefSeq	1798	chrX	-	38008587	38080177	AATGCTGCAGGCTGTTGCTGCGAATCCCACTCTACTCCTTCAGTATGGTGCTAGTGGATA	8406	sushi repeat-containing protein SRPX isoform 4 precursor	4.88758	6.34087
ASHGA5P050042	0.00287487	0.0318783	2.73333	down	protein_coding	ENST00000330475	CCDS12071.1	ADAMTSL5	GENCODE	2857	chr19	-	1505016	1513188	TGTTCCCCAGGCCCCACCTCTTCCAGAACCTCCTGCTCTTCCTGTGGGCCCTGCTGAACT	339366	ADAMTS-like 5 [Source:HGNC Symbol;Acc:27912]	8.6333	10.084
ASHGA5P039248	0.000759264	0.023569	2.73314	down	protein_coding	NM_153690	CCDS33923.1	FAM43A	RefSeq	3182	chr3	+	194406621	194409766	AAGTAGCACTGTTCTGGTTCTGTTTGCACGCCAGTGGGGAGAGAATAAAGAGGAAAATTT	131583	protein FAM43A	4.86329	6.31385
ASHGA5P007180	0.00526453	0.0340831	2.73196	down	protein_coding	ENST00000329125	CCDS54068.1	GP1BA	GENCODE	2501	chr17	+	4835591	4838325	AAGACGCTCTGTGCCTTCGGAGGTCTTTCTGCCTGCCTGTCCTCATGCCTCTCCTCCTCT	2811	"glycoprotein Ib (platelet), alpha polypeptide [Source:HGNC Symbol;Acc:4439]"	6.68609	8.13603
ASHGA5P055574	0.00504302	0.0338278	2.73168	down	protein_coding	NM_006838	CCDS9052.1	METAP2	RefSeq	3506	chr12	+	95867821	95909613	TCGCCGCTCTGTCTCATTCCCTCGCGCTCTCTCGGGCAACATGGCGGGTGTGGAGGAGGT	10988	methionine aminopeptidase 2	6.11506	7.56485
ASHGA5P013611	0.00623226	0.0353305	2.72518	down	protein_coding	NM_033247	CCDS10256.1	PML	RefSeq	1797	chr15	+	74287013	74328735	CGTTGACCTGCTGCCTCCTCCAGCCCATGCTCTTACAGGCCCTGCACAGAGTAGCACTCA	5371	protein PML isoform 8	7.48451	8.93086
ASHGA5P004713	0.0186777	0.0616758	2.72485	down	protein_coding	NM_032355	CCDS2808.2	MON1A	RefSeq	2244	chr3	-	49946301	49967445	GCAGACAAGAACGCCATCCGCTCCATCCATGCAGATGGCTACAAGGTAGTATTCGTGCGC	84315	vacuolar fusion protein MON1 homolog A isoform a	4.73736	6.18353
ASHGA5P053908	0.0122854	0.0490403	2.72468	down	protein_coding	ENST00000540122	CCDS55366.1	HDHD1	GENCODE	825	chrX	-	6975626	7066231	GGATCCCTTCTCAGCGCTCCTCCTTCTGTGTAATCAACTGCTTCTCTGCTCTGATGACAC	8226	haloacid dehalogenase-like hydrolase domain containing 1 [Source:HGNC Symbol;Acc:16818]	6.19152	7.6376
ASHGA5P005703	0.00189816	0.0290776	2.71765	down	protein_coding	ENST00000308919	CCDS5319.2	CYP2W1	GENCODE	2304	chr7	+	1022834	1029276	TTCTCTGCAGGCCGCCGCGTCTGTGTTGGGGAGCGCCTGGCCAGGACCGAGCTCTTCCTG	54905	"cytochrome P450, family 2, subfamily W, polypeptide 1 [Source:HGNC Symbol;Acc:20243]"	3.85225	5.29461
ASHGA5P011835	0.0202763	0.0649951	2.71692	down	protein_coding	ENST00000373745	CCDS13286.1	DSN1	GENCODE	2354	chr20	-	35380193	35402154	CCTCCTCCCGGAGTTTACCACCTAGGATGACTTCAGTGACTAGATCAGAGATCATAGATG	79980	"DSN1, MIND kinetochore complex component, homolog (S. cerevisiae) [Source:HGNC Symbol;Acc:16165]"	4.55197	5.99394
ASHGA5P014082	1.79977e-06	0.00323004	2.71543	down	protein_coding	ENST00000399448	CCDS41744.1	PTPN6	GENCODE	2159	chr12	+	7055739	7070479	AGAGATGCTGTCCCGTGGGTGGTTTCACCGAGACCTCAGTGGGCTGGATGCAGAGACCCT	5777	"protein tyrosine phosphatase, non-receptor type 6 [Source:HGNC Symbol;Acc:9658]"	3.01503	4.45621
ASHGA5P007622	0.00104738	0.0253141	2.71527	down	protein_coding	NM_001012514	CCDS33396.1	ITM2C	RefSeq	1982	chr2	+	231729620	231743963	GCCGGCTAGGCTGGCCCGAGATAACTTCTTCCGCTGTGGTGTGCTGTATGAGGACTCCCT	81618	integral membrane protein 2C isoform 3	3.66595	5.10704
ASHGA5P044580	0.00191025	0.029175	2.71455	down	protein_coding	ENST00000542437	CCDS55280.1	CCDC166	GENCODE	1320	chr8	-	144788863	144790279	TGTCCTCACAGGACACTCTCCGCTCCACGAAGTCTGGCCCCAAGCTTCTCTCTGGCCTGT	100130274	coiled-coil domain containing 166 [Source:HGNC Symbol;Acc:41910]	7.3777	8.81841
ASHGA5P009774	0.00930865	0.0422432	2.71154	down	protein_coding	ENST00000398793	CCDS13797.1	TOP3B	GENCODE	3107	chr22	-	22311402	22337147	TACAACCACCCACCCTTCCGAGACATGAAGAAAGGCATGGGCTGCAACGAGTGTACGCAC	8940	topoisomerase (DNA) III beta [Source:HGNC Symbol;Acc:11993]	6.70445	8.14356
ASHGA5P010898	0.0143096	0.0530424	2.7103	down	protein_coding	NM_002857	CCDS1201.1	PEX19	RefSeq	3722	chr1	-	160246598	160254941	AGAGCTGGCTGGAGAGATGCCTCCTGGCCTCAACTTTGACCTGGATGCCCTCAATCTTTC	5824	peroxisomal biogenesis factor 19 isoform a	4.32787	5.76633
ASHGA5P002597	0.0277558	0.0795131	2.7093	down	protein_coding	NM_005460	CCDS4131.1	SNCAIP	RefSeq	3569	chr5	+	121647819	121799794	CTCTCTCCTGCCACACCTAGCTGCAGACAATCTAGACAAAATTCACGACGAAAATGGAAA	9627	synphilin-1 isoform 1	5.81264	7.25056
ASHGA5P049325	0.00330129	0.0326774	2.7087	down	protein_coding	NM_001170716	CCDS54042.1	BCAR1	RefSeq	3195	chr16	-	75262927	75300707	CACTTGCTCTAGATGCTCACCCACCGTCCCCAGGAAGCAGAACAGAGGGGTCGGACCCCT	9564	breast cancer anti-estrogen resistance protein 1 isoform 3	5.89619	7.33378
ASHGA5P013195	0.000547136	0.0220186	2.70764	down	protein_coding	NM_001037954		DIXDC1	RefSeq	5899	chr11	+	111807926	111893307	GCTGCTCCAGCCTGACTTCACCCAGTCCAATCCACAGTGCAAAGAGCGAGTCCATTATAA	85458	dixin isoform a	5.88735	7.32439
ASHGA5P004766	0.0263924	0.0768435	2.70547	down	protein_coding	NM_001168394	CCDS54948.1	CREBRF	RefSeq	2536	chr5	+	172483354	172519333	CCCAGTCCCTGAGCCGCCCCTACACCCACAGACAGCATCGCACAGAATTATTTTAAAAAA	153222	CREB3 regulatory factor isoform 2	9.38001	10.8159
ASHGA5P006154	0.00457492	0.0337471	2.70536	down	protein_coding	NM_001184967	CCDS54607.1	MITF	RefSeq	4685	chr3	+	69812706	70017488	CACCACCCTTCCCTCTGCCACGCAGGTGCCGATGGAAGTCCTTAAGGTGCAGACCCACCT	4286	microphthalmia-associated transcription factor isoform 7	7.5232	8.95902
ASHGA5P055121	0.0473328	0.113108	2.70046	down	protein_coding	NM_153818	CCDS41.1	PEX10	RefSeq	2094	chr1	-	2336240	2344010	TGCCTTACAGCTCCGTGTCCGCAGCCTGCCCGGAGAGGACCTGAGGGCCCGTGTTAGCTA	5192	peroxisome biogenesis factor 10 isoform 1	3.79059	5.22379
ASHGA5P052628	0.024628	0.0732939	2.69754	down	protein_coding	NM_001207043		LOC554223	RefSeq	1301	chr6	+	29759682	29765584	ATCTTTGCAGGGTTTCTCTTCTCCCTCTCCCAACCTGTGTCGGGTCCTTCTTCCTGGGTA	554223	histocompatibility antigen-related	8.22786	9.65951
ASHGA5P050854	0.0135225	0.0516452	2.69586	down	protein_coding	NM_022049	CCDS772.1	GPR88	RefSeq	3465	chr1	+	101003727	101007583	TGAAGAGTTGGCCAGAATGACCAACTCCTCCTCCACATCCACCTCCTCCACCACCGGTGG	54112	probable G-protein coupled receptor 88	7.00863	8.43937
ASHGA5P034371	0.00927095	0.0421621	2.69443	down	protein_coding	ENST00000215582	CCDS12042.1	C19orf21	GENCODE	2851	chr19	+	751145	764318	TTCAGCCCCATCCACCTACACTCAAACGTGGCGTGGACAGTGGAAGATCCAGTGGACAGT	126353	chromosome 19 open reading frame 21 [Source:HGNC Symbol;Acc:27000]	5.12652	6.5565
ASHGA5P045641	0.0250438	0.0741632	2.6935	down	protein_coding	ENST00000317861	CCDS31112.1	OR14C36	GENCODE	939	chr1	+	248512076	248513015	CTCCCCTCTTTAACCCTATTATTTACAGTCTTAGAAATAAGCAAATAAAGGTGGCCATCA	127066	"olfactory receptor, family 14, subfamily C, member 36 [Source:HGNC Symbol;Acc:15026]"	5.96066	7.39014
ASHGA5P014939	0.000754342	0.023569	2.68991	down	protein_coding	ENST00000414982	CCDS54206.1	PNPLA6	GENCODE	4573	chr19	+	7599590	7626653	AACTGGAATGATGGGGACATCGAGTCACGGGCTGGCTACGAACTCCTCGGGGGCGAAGGT	10908	patatin-like phospholipase domain containing 6 [Source:HGNC Symbol;Acc:16268]	6.44441	7.87197
ASHGA5P007976	0.0260743	0.0762178	2.68925	down	protein_coding	NM_031925		TMEM120A	RefSeq	1497	chr7	-	75616154	75623992	AGGAGTGGCAGGTGCTTATGTGCGGCTTTCCCTTCCTCCTCCTTTTCCTCGGCAATTTCT	83862	transmembrane protein 120A	8.16126	9.58846
ASHGA5P036166	0.000958451	0.0249914	2.68908	down	protein_coding	NM_002410	CCDS2171.1	MGAT5	RefSeq	8163	chr2	+	135011829	135212192	TCAACCAACTCCACTACAGCTGTTCCCAGCTTGGTTGCACTTGAGAAAATTAATGTGGCA	4249	"alpha-1,6-mannosylglycoprotein 6-beta-N-acetylglucosaminyltransferase A"	4.06865	5.49577
ASHGA5P038103	0.00204668	0.0300663	2.68802	down	protein_coding	NM_001134941	CCDS46750.1	GHRL	RefSeq	549	chr3	-	10327433	10332419	CATGCTCTGGCTGGACTTGGCCATGGCAGGCTCCAGCTTCCTGAGCCCTGAACACCAGAG	51738	appetite-regulating hormone isoform 2 preproprotein	3.91477	5.34131
ASHGA5P047744	0.00122642	0.026401	2.68744	down	protein_coding	NM_006997	CCDS7627.1	TACC2	RefSeq	3916	chr10	+	123923104	124014057	GTCGCAGTCCCTGCAGCCAGCCCCAGCCAGCGACCTGAACCTGGAGGCTTCCGAGGCAAT	10579	transforming acidic coiled-coil-containing protein 2 isoform d	6.36019	7.78643
ASHGA5P048520	0.0131277	0.0507563	2.67848	down	protein_coding	NM_001005467	CCDS31709.1	OR8B3	RefSeq	942	chr11	-	124266305	124267247	GGGTGCATGACTCAGCTGTTTTTCTTTCTCTTTTTTGTCATCTCTGAATGTTACATGTTG	390271	olfactory receptor 8B3	3.5923	5.01371
ASHGA5P045876	0.00492616	0.0338278	2.67537	down	protein_coding	NM_003692	CCDS6750.1	TMEFF1	RefSeq	2501	chr9	+	103235519	103339918	TGCTTCTGCTCTTCGCCTTCTCTCTGCCCGGGAGCCGCGCGTCCAACCAGCCCCCGGGTG	8577	tomoregulin-1 precursor	6.18674	7.60648
ASHGA5P048687	0.0216839	0.0678468	2.67277	down	protein_coding	NM_001948	CCDS45255.1	DUT	RefSeq	1874	chr15	+	48624364	48635570	GTGCGCTCTCCTCTTCCCCCGGTGGTCTCCTCGCTCGCCTTCTGGCTCTGCCATGCCCTG	1854	"deoxyuridine 5'-triphosphate nucleotidohydrolase, mitochondrial isoform 2"	8.90361	10.3219
ASHGA5P034674	0.0222933	0.0690909	2.66746	down	protein_coding	ENST00000263284	CCDS46120.1	CCDC61	GENCODE	1825	chr19	+	46498338	46521874	CTCCCTTCCAGGCCCTCCCCACCACGTGGGCGCGGCCTACCCTCCCGCAGGGGGTAATAG		coiled-coil domain containing 61 [Source:HGNC Symbol;Acc:33629]	8.85031	10.2658
ASHGA5P049091	0.00199868	0.0299571	2.66236	down	protein_coding	NM_001034841	CCDS32395.1	ITPRIPL2	RefSeq	7722	chr16	+	19125253	19132952	TCCTCCTCAGCTATGTCCTCCTGCGCTGTCGCCACGCTGTCCGGCAGCGCTTCCTGCCCG	162073	"inositol 1,4,5-trisphosphate receptor-interacting protein-like 2 precursor"	5.17232	6.58502
ASHGA5P009604	0.023863	0.0719624	2.66045	down	protein_coding	NM_002816	CCDS11669.1	PSMD12	RefSeq	1814	chr17	-	65336618	65362721	TTGAAACCCTTCTCTCTCTGGAAAAGCAGACTCGTACTGCTTCCGATATGGTATCGACAT	5718	26S proteasome non-ATPase regulatory subunit 12 isoform 1	4.22833	5.64
ASHGA5P013704	0.000234104	0.0182999	2.65672	down	protein_coding	NM_006641	CCDS2733.1	CCR9	RefSeq	2518	chr3	+	45927995	45944667	GCCCTCCACAAGCCCTATTCCTAACATGGCTGATGACTATGGCTCTGAATCCACATCTTC	10803	C-C chemokine receptor type 9 isoform B	8.46821	9.87786
ASHGA5P020660	0.0305714	0.0844443	2.64749	down	protein_coding	NM_001165039	CCDS55207.1	GFRA2	RefSeq	2977	chr8	-	21549529	21646346	ATTTAACATGATCTTGGCAAACGTCTTCTGCCTCTTCTTCTTTCTAGGGACAGGGGCAGA	2675	GDNF family receptor alpha-2 isoform c precursor	6.15754	7.56216
ASHGA5P007341	0.00811386	0.0394727	2.64678	down	protein_coding	NM_001010898	CCDS30799.1	SLC6A17	RefSeq	6422	chr1	+	110693131	110744823	ATCGGCTTCTCCAGCTGCATAGTCTGTCTCTTTGTGGGGCTGTATTATAATGTGATCATC	388662	sodium-dependent neutral amino acid transporter SLC6A17	4.48733	5.89157
ASHGA5P052673	0.00251702	0.0314036	2.64671	down	protein_coding	NM_022110	CCDS4738.1	FKBPL	RefSeq	1357	chr6	-	32096483	32098067	GGGCTGGCTCAGGGTCTGCGCAAGATGTTTGGCTGATTAAAAGTTAAACCTTAAAAGAGA	63943	FK506-binding protein-like	5.73926	7.14346
ASHGA5P002813	0.0142322	0.0529524	2.64641	down	protein_coding	NM_001166237	CCDS34956.1	GSDMD	RefSeq	2326	chr8	+	144635556	144645231	TGACTCTGACTTGGACGTCCTTCTCTTCCCGGATAAGAAGCAGAGGACCTTCCAGCCACC	79792	gasdermin-D	4.38594	5.78997
ASHGA5P005563	0.0192017	0.0627752	2.64506	down	protein_coding	NM_003711	CCDS34159.1	PPAP2A	RefSeq	1638	chr5	-	54720682	54830873	GTGTTGCTGGCTGGATTGCCTTTTGCAATTCTTACTTCAAGGCATACCCCCTTCCAACGA	8611	lipid phosphate phosphohydrolase 1 isoform 1	7.35353	8.75683
ASHGA5P011779	0.0384984	0.0989361	2.64445	down	protein_coding	NM_001190730	CCDS55344.1	RALGPS1	RefSeq	1849	chr9	+	129677052	129940810	AGATCTTGCAGCCATGTGAGACCAGAAACCAGCAAGCCAGCCAACCTCCAGCATCAGAGC	9649	ras-specific guanine nucleotide-releasing factor RalGPS1 isoform 4	5.03389	6.43686
ASHGA5P038190	0.00601154	0.0347952	2.64089	down	protein_coding	NM_144634	CCDS2697.1	LYZL4	RefSeq	886	chr3	-	42438574	42452065	TTCTCTCCCTCCTTGGCTACCTGGTGGTTCCAAGTGGTGCTTACATCTTGGGGCGTTGCA	131375	lysozyme-like protein 4 precursor	11.8343	13.2353
ASHGA5P011443	0.0129853	0.0505084	2.63682	down	protein_coding	NM_006671	CCDS574.1	SLC1A7	RefSeq	2677	chr1	-	53552854	53608289	CCTCCTCCAGCTCAGCCACACTGCCCATCACCTTCAAGTGCCTGCTGGAGAACAACCACA	6512	excitatory amino acid transporter 5	6.16723	7.56604
ASHGA5P017784	0.000228051	0.0182999	2.63109	down	protein_coding	NM_001145727	CCDS44847.1	IFLTD1	RefSeq	2504	chr12	-	25649250	25801496	ACCCACCACAATGCCAGCCCCTTCTCAGTTCCGAAGAAACAGGATGAATCACCCATGATT	160492	intermediate filament tail domain-containing protein 1 isoform 3	7.01595	8.41161
ASHGA5P010004	0.0100532	0.0439726	2.62526	down	protein_coding	NM_001134937	CCDS47055.1	FIP1L1	RefSeq	2440	chr4	+	54243819	54326103	CCACCTCCAGGTTTTCCTCCTCCACCAGGCGCTCCACCTCCATCTCTTATACCAACAATA	81608	pre-mRNA 3'-end-processing factor FIP1 isoform 2	8.09779	9.49025
ASHGA5P045749	0.00736519	0.0377476	2.62281	down	protein_coding	NM_001098805	CCDS43828.1	ANKRD20A4	RefSeq	3517	chr9	+	69381980	69425109	CCCAGATGAATTGAAGTGTATTGCTGTGTCTTGTAATACCTTGCTTTAACTAGCTTTTTA	728747	ankyrin repeat domain-containing protein 20A4	3.41969	4.8108
ASHGA5P055270	0.00125956	0.0265654	2.61746	down	protein_coding	NM_080730	CCDS8550.2	IFFO1	RefSeq	2716	chr12	-	6648693	6665249	GCCTTCCATCCCTGCTCCTGCACCGGTCTGCATCTCCCAGCAGAAGGCGCAGCCATGAAT	25900	intermediate filament family orphan 1 isoform 2	10.2144	11.6026
ASHGA5P041327	0.00803539	0.0393541	2.61613	down	protein_coding	NM_177478	CCDS4128.1	FTMT	RefSeq	894	chr5	+	121187649	121188523	AAAGTCAGCTGTCTCCTGCTTTCTTGCCCTTAAAATCACCTCCATCTTTATATTCTTCTG	94033	"ferritin, mitochondrial precursor"	4.76269	6.15013
ASHGA5P053321	0.007754	0.0386796	2.61343	down	protein_coding	NM_033139	CCDS47716.1	CALD1	RefSeq	4291	chr7	+	134576150	134655480	CGCCCCTTCCCAACTGCGGACATGCTGGGTGGATCCGGATCGCATGGAAGACGCAGCCTG	800	caldesmon isoform 4	6.27212	7.65806
ASHGA5P032823	0.00254818	0.0314036	2.60961	down	protein_coding	NM_001141	CCDS11128.1	ALOX15B	RefSeq	2730	chr17	+	7942357	7952451	ATACACCCTGCACATCAACACACTCGCCCGGGAGCTGCTTATCGTGCCAGGGCAGGTGGT	247	arachidonate 15-lipoxygenase B isoform d	4.32647	5.7103
ASHGA5P052092	0.00354711	0.0328487	2.60939	down	protein_coding	NM_173080	CCDS1031.1	SPRR4	RefSeq	766	chr1	+	152943127	152945069	AACAGAAGTAAGGATGGACTGGATATTACCATCATCCACCATCCTGGCTACCAGATGGAA	163778	small proline-rich protein 4	5.01959	6.4033
ASHGA5P043900	0.00675329	0.0363006	2.6084	down	protein_coding	NM_005631	CCDS5811.1	SMO	RefSeq	3772	chr7	+	128828712	128853385	TACGTCAATGCGTGCTTCTTTGTGGGCAGCATTGGCTGGCTGGCCCAGTTCATGGATGGT	6608	smoothened homolog precursor	3.46589	4.84906
ASHGA5P039864	0.00560469	0.0344776	2.606	down	protein_coding	NM_022836	CCDS866.1	DCLRE1B	RefSeq	3795	chr1	+	114447914	114456708	ACTGTCCTGGTTCTGTCATGTTTCTCTTTGAAGGATATTTTGGAACCATCCTCTACACAG	64858	5' exonuclease Apollo	3.82005	5.20189
ASHGA5P051693	0.00797087	0.0392219	2.60463	down	protein_coding	NM_001679	CCDS3121.1	ATP1B3	RefSeq	1853	chr3	+	141595469	141645382	CTCCTCTCGCCGTCCGCGCGCACACCATGACGAAGAACGAGAAGAAGTCCCTCAACCAGA	483	sodium/potassium-transporting ATPase subunit beta-3	4.65435	6.03543
ASHGA5P036470	0.000131917	0.0145843	2.60313	down	protein_coding	ENST00000295641	CCDS46521.1	STK11IP	GENCODE	3601	chr2	+	220462595	220481173	ATCTCCTGCTGTGTGTCCTAACTGTGGTAGTGACCACGTGGTTCTCCTCGCTGTGTCTCG	114790	serine/threonine kinase 11 interacting protein [Source:HGNC Symbol;Acc:19184]	4.05811	5.43836
ASHGA5P047874	0.0164044	0.0571909	2.60262	down	protein_coding	ENST00000316650	CCDS31405.1	OR56A1	GENCODE	1071	chr11	-	6047900	6048971	TCTAATACCTCCTGTTCTTCCTCTTCAGTGATTTTACCTAGGCAGCGAAGTAGAGAAATG	120796	"olfactory receptor, family 56, subfamily A, member 1 [Source:HGNC Symbol;Acc:14781]"	4.29067	5.67064
ASHGA5P055483	0.00431903	0.0334484	2.601	down	protein_coding	NM_013449	CCDS44924.1	BAZ2A	RefSeq	8934	chr12	-	56989379	57030163	ATTCCTTTCCTGACCAGAATTTTGAGGTGATGCCCAATGGACCCCCTAGTTTTTTCACCT	11176	bromodomain adjacent to zinc finger domain protein 2A	7.48058	8.85964
ASHGA5P014697	0.0128402	0.0501545	2.59763	down	protein_coding	NM_001001329	CCDS45977.1	PRKCSH	RefSeq	2253	chr19	+	11546268	11561782	GCAGCCCAAGCCGGCCAGCCCTGCTGAGGAAGACAAAATGCCGCCCTACGACGAGCAGAC	5589	glucosidase 2 subunit beta isoform 2 precursor	5.58966	6.96686
ASHGA5P019100	0.0370728	0.0963912	2.59757	down	protein_coding	NM_023924	CCDS34127.2	BRD9	RefSeq	2699	chr5	-	863849	892939	AGCGTGCCGGACACAGCCAGCCGAAAATGAGAGCACACCTATTCAGCAACTCCTGGAACA	65980	bromodomain-containing protein 9 isoform 1	3.38982	4.76698
ASHGA5P055556	0.00645839	0.0355515	2.591	down	protein_coding	NM_018057	CCDS9027.1	SLC6A15	RefSeq	4276	chr12	-	85274628	85306608	TTCTGGAAAAGTTAGTATGTTAGAGCCCTTCCTCATTCTGCTAATCACCATTTCTGGATT	55117	sodium-dependent neutral amino acid transporter B(0)AT2 isoform 2	5.29236	6.66587
ASHGA5P012868	0.000432342	0.0211743	2.58545	down	protein_coding	NM_058240	CCDS53904.1	SLC8A3	RefSeq	5259	chr14	-	70510933	70655787	TTGCCCTTGGTGAACCGAAATGGATGGAACGTGGAATATCAGCGCTCCTGTTATCTCCAG	6547	sodium/calcium exchanger 3 isoform B precursor	6.60952	7.97994
ASHGA5P052646	0.0198947	0.0641757	2.58471	down	protein_coding	NM_002701	CCDS34391.1	POU5F1	RefSeq	1411	chr6	-	31132113	31138451	CAAGCCCTCATTTCACCAGGCCCCCGGCTTGGGGCGCCTTCCTTCCCCATGGCGGGACAC	5460	"POU domain, class 5, transcription factor 1 isoform 1"	6.24346	7.61346
ASHGA5P052542	0.0240297	0.0722512	2.58059	down	protein_coding	NM_014275	CCDS4448.1	MGAT4B	RefSeq	2482	chr5	-	179224597	179233952	CCTTCCTGACGCTGCTGCTCTTCTGCCTGTGCGCCTTCCTCTCGCTGTCCTGGTACGCGG	11282	"alpha-1,3-mannosyl-glycoprotein 4-beta-N-acetylglucosaminyltransferase B isoform 1 precursor"	7.10403	8.47174
ASHGA5P055646	2.05329e-06	0.00323004	2.57905	down	protein_coding	NM_006253	CCDS9191.1	PRKAB1	RefSeq	2412	chr12	+	120105760	120119429	GTCCCCGCAGACCCCCATCATGGGCAATACCAGCAGTGAGCGCGCCGCGCTGGAGCGGCA	5564	5'-AMP-activated protein kinase subunit beta-1	7.04708	8.41392
ASHGA5P046456	0.00170276	0.0287673	2.57828	down	protein_coding	NM_001080975	CCDS43919.1	REPS2	RefSeq	7961	chrX	+	16964813	17171403	AAACCCATTCCAGAGCCTCCTCCTTGGATCTGAATAAAGTCTTCCAGCCCAGTGTGCCAG	9185	ralBP1-associated Eps domain-containing protein 2 isoform 2	6.31229	7.6787
ASHGA5P008709	0.010053	0.0439726	2.57755	down	protein_coding	NM_004532	CCDS3310.1	MUC4	RefSeq	4111	chr3	-	195473637	195538844	TGTCTCTGCCTCCTTCCGCATGTGGTCCCAGGAATGACAACACCGTCACTGAAGACAGAC	4585	mucin-4 isoform d precursor	5.81107	7.17707
ASHGA5P012829	0.00700367	0.0368715	2.57745	down	protein_coding	NM_001037442	CCDS34001.1	RUFY3	RefSeq	4435	chr4	+	71587695	71674336	TAATCAGATGGCTGCTACCATTAAACAACTTGAACAAAGATTGCGCCAGGCTGAGCGAAG	22902	protein RUFY3 isoform 1	3.75651	5.12246
ASHGA5P002410	0.0215862	0.0676403	2.57716	down	protein_coding	NM_032639	CCDS5424.1	PLEKHA8	RefSeq	2315	chr7	+	30067976	30130359	ACAGCCCTAAGAAATCCAACAGAAAACACTTGACACCAAAACATACCCTGATGAAGATCC	84725	pleckstrin homology domain-containing family A member 8 isoform 3	3.34933	4.71512
ASHGA5P035027	0.000380102	0.0201625	2.57675	down	protein_coding	NM_001010889	CCDS30594.1	PRAMEF6	RefSeq	1720	chr1	+	13359832	13368936	CTGTTGAATGCCTGCCTATTTGGGTGGATATGTCAAACGCTTTCTTCTGGACACTTGGAA	440561	PRAME family member 6	3.46112	4.82667
ASHGA5P013153	0.00135122	0.0271497	2.57549	down	protein_coding	NM_002698	CCDS33035.1	POU2F2	RefSeq	6904	chr19	-	42590261	42636625	TCCCACACAGCCCCCCAAATGCTTGGAGCCACCATCCCACCCCGAGGAGCCCAGTGATCT	5452	"POU domain, class 2, transcription factor 2 isoform 2"	9.21936	10.5842
ASHGA5P004811	0.00539151	0.0342414	2.57073	down	protein_coding	NM_015496	CCDS34923.1	KIAA1429	RefSeq	6456	chr8	-	95500004	95565746	TGACACAATTGGATGCTGTGGAGATGATAATGGTCTCATGGAAGTAGAGGGAGCTCATAC	25962	protein virilizer homolog isoform 1	2.82521	4.18739
ASHGA5P001000	0.00538944	0.0342414	2.56669	down	protein_coding	NM_033409	CCDS13007.1	SLC52A3	RefSeq	2716	chr20	-	740723	749228	AGTCCTCATTGTGGCCTCGTGGGTGCTTTTCAGCGGCTGCCTCAGTTACGTCAAGGTGAT	113278	"solute carrier family 52, riboflavin transporter, member 3"	4.44944	5.80935
ASHGA5P011384	0.00409032	0.0330909	2.56659	down	protein_coding	NM_014495	CCDS622.1	ANGPTL3	RefSeq	2126	chr1	+	63063186	63071180	GGTTATTCAGGAGGCTGGTGGTGGCATGATGAGTGTGGAGAAAACAACCTAAATGGTAAA	27329	angiopoietin-related protein 3 precursor	3.15866	4.51851
ASHGA5P049214	0.00029698	0.0187505	2.56525	down	protein_coding	NM_152496	CCDS426.1	MANEAL	RefSeq	2399	chr1	+	38261159	38267278	TTGCGTCTCAGGCGTCCTGGTCCTGTCCTGGTACCCACCTGGCATGGCTGATGATAACGG	149175	"glycoprotein endo-alpha-1,2-mannosidase-like protein isoform 2"	6.83307	8.19217
ASHGA5P051740	0.0258126	0.0756264	2.56142	down	protein_coding	NM_024996	CCDS33885.1	GFM1	RefSeq	3468	chr3	+	158362316	158410360	TGAACCCACCCGGCGCCACGGGACTTTGACGCGTGCTCTGCGCTTGCCATGAGACTCCTG	85476	"elongation factor G, mitochondrial"	6.24565	7.60259
ASHGA5P044140	0.0242578	0.0725121	2.56118	down	protein_coding	NM_001001931	CCDS43718.1	MTUS1	RefSeq	4022	chr8	-	17501302	17579730	GTCGTGGGATCGTACAGCCTTTGTATAATTCCTTTGTTAGCCACGTTTACTGGGAAAAAA	57509	microtubule-associated tumor suppressor 1 isoform 4	4.80977	6.16658
ASHGA5P052649	0.00107355	0.025374	2.55591	down	protein_coding	NM_000247		MICA	RefSeq	1365	chr6	+	31371370	31383090	GCCCGGTCTTTCTGCTTCTGGCTGGCATCTTCCCTTTTGCACCTCCGGGAGCTGCTGCTG	100507436	MHC class I polypeptide-related sequence A isoform 1 (MICA*001) precursor	6.34321	7.69704
ASHGA5P003153	0.0124915	0.0495527	2.55004	down	protein_coding	NM_198329	CCDS3077.1	UBA5	RefSeq	2866	chr3	+	132373289	132396944	CTACCCACCACCAGCCGCTTGATGGCATTGAAACGAATGGGAATTGTAAGCGACTATGAG	79876	ubiquitin-like modifier-activating enzyme 5 isoform 2	5.32512	6.67564
ASHGA5P037924	3.4083e-05	0.0114441	2.54912	down	protein_coding	NM_033382	CCDS46685.1	SEC14L2	RefSeq	1845	chr22	+	30792929	30812964	AAGCCCCATGTCCAGCTTTCTGCCTGTGAGGTTCCTCTTCCTCCATGGATTTTTGGCTCT	23541	SEC14-like protein 2 isoform 2	5.86181	7.21181
ASHGA5P012965	0.00597691	0.0347809	2.5444	down	protein_coding	ENST00000382058	CCDS46695.1	FBXO7	GENCODE	1758	chr22	+	32871223	32894818	GTCCCCTCCTCGATTCAGAGCATTCTTCACTCCAGAATAATGAGCAACCCTCTTTGGCCA	25793	F-box protein 7 [Source:HGNC Symbol;Acc:13586]	7.44047	8.7878
ASHGA5P002450	0.00485916	0.0338278	2.54307	down	protein_coding	NM_004305	CCDS2137.1	BIN1	RefSeq	2269	chr2	-	127805598	127864903	AGAAGAACAGTGACAACGCGCCTGCAAAAGGGAACAAGAGCCCTTCGCCTCCAGATGGCT	274	myc box-dependent-interacting protein 1 isoform 8	5.22202	6.56859
ASHGA5P006088	0.0104063	0.0448211	2.54272	down	protein_coding	ENST00000313639	CCDS45917.1	FZR1	GENCODE	3170	chr19	+	3522953	3536755	TCTGTTCACGGTGACGCGGCTCTGTGACCTCTCAGTGGAAGGGGACTCAGTGACCTCCGT	51343	fizzy/cell division cycle 20 related 1 (Drosophila) [Source:HGNC Symbol;Acc:24824]	5.93688	7.28325
ASHGA5P030601	0.00259196	0.0316598	2.54259	down	protein_coding	ENST00000432196	CCDS45281.1	KBTBD13	GENCODE	3123	chr15	+	65369153	65372276	TTAGGAACCTAGTGCTGACCTCTGTTGTTGGATGAGGACTCTCGTTCCTTCATCAAAATC	390594	kelch repeat and BTB (POZ) domain containing 13 [Source:HGNC Symbol;Acc:37227]	3.01214	4.35845
ASHGA5P006809	0.0136191	0.05182	2.54019	down	protein_coding	NM_030765	CCDS9227.1	B3GNT4	RefSeq	1554	chr12	+	122688227	122692084	TTTACCAAAGGGACCGGCGATGCTCTGCAGGCTGTGCTGGCTGGTCTCGTACAGCTTGGC	79369	"UDP-GlcNAc:betaGal beta-1,3-N-acetylglucosaminyltransferase 4"	3.47975	4.82468
ASHGA5P019106	0.00407477	0.0330909	2.53822	down	protein_coding	NM_007299	CCDS11455.2	BRCA1	RefSeq	3800	chr17	-	41196311	41277468	TGTTGCTATGGGCCCTTCACCAACATGCCCACAGGGTGTCCACCCAATTGTGGTTGTGCA	672	breast cancer type 1 susceptibility protein isoform 5	4.43885	5.78267
ASHGA5P008971	0.0137398	0.0520326	2.53508	down	protein_coding	NM_001168344	CCDS34336.1	RREB1	RefSeq	8532	chr6	+	7107829	7252213	TACAGAGGCACATGCTCACACACACTGACAGTCAGTCGGATGCGGAGACTGCAGCCGCCG	6239	ras-responsive element-binding protein 1 isoform 2	4.06487	5.40691
ASHGA5P034285	0.0472075	0.112914	2.53309	down	protein_coding	NM_002152	CCDS12759.1	HRC	RefSeq	2430	chr19	-	49654455	49658681	TGAAGAGGACTTCCAAGATGAGTATAAAACAGAAGTCCCTCACCATCACCACCACAGAGT	3270	sarcoplasmic reticulum histidine-rich calcium-binding protein precursor	5.51629	6.85718
ASHGA5P004015	0.00078843	0.023569	2.53289	down	protein_coding	NM_001079911	CCDS43249.1	DMP1	RefSeq	2645	chr4	+	88571453	88585512	TCAGGCACCAACACCACCCTTGGCAAATGAAGACCCCAGTGACAGCACTCAGTCAGAGGA	1758	dentin matrix acidic phosphoprotein 1 isoform 2 precursor	9.50959	10.8504
ASHGA5P009676	0.0215999	0.0676624	2.53135	down	protein_coding	NM_001042376	CCDS41598.1	INS-IGF2	RefSeq	847	chr11	-	2167852	2182439	GACCTGCAGGCCTCAGCTTTGTCCCTCTCCTCCTCCACGTCAACCTGGCCAGAGGGTCTG	723961	insulin- insulin-like growth factor 2 read-through product precursor	8.02196	9.36187
ASHGA5P001748	0.00974048	0.0434309	2.52946	down	protein_coding	NM_013278	CCDS42217.1	IL17C	RefSeq	1048	chr16	+	88705000	88706882	CACCATGACGCTCCTCCCCGGCCTCCTGTTTCTGACCTGGCTGCACACATGCCTGGCCCA	27189	interleukin-17C precursor	8.48633	9.82516
ASHGA5P052692	0.0369518	0.0962406	2.52396	down	protein_coding	NM_005453	CCDS4775.1	ZBTB22	RefSeq	2681	chr6	-	33282181	33285512	GGTATCCCCTCCCTCCACAACATGGAGCCATCTCCTCTGTCTCCCAGTGGGGCAGCACTT	9278	zinc finger and BTB domain-containing protein 22	10.578	11.9137
ASHGA5P054156	0.000488853	0.0212828	2.52135	down	protein_coding	NM_001080790	CCDS35423.1	MAGEA9B	RefSeq	1814	chrX	+	148863592	148869399	CCCATCTGCTACCCATCCCTTTATGAAGAGGTTTTGGGAGAGGAGCAAGAGGGAGTCTGA	728269	melanoma-associated antigen 9	4.91186	6.24606
ASHGA5P006955	0.0120073	0.0483662	2.52084	down	protein_coding	ENST00000326233	CCDS1025.1	LCE1D	GENCODE	430	chr1	+	152769226	152770657	TGTGACTCCGCTCCTGAACACCCACCACCGAGATGTCCTGCCAGCAGAGCCAGCAGCAGT	353134	late cornified envelope 1D [Source:HGNC Symbol;Acc:29465]	8.49108	9.82498
ASHGA5P051862	0.0276596	0.079349	2.51973	down	protein_coding	NM_207046	CCDS961.1	ENSA	RefSeq	1116	chr1	-	150594598	150601609	AAGACGGTGAATGGAAAGGGGATGGCTGGTGGTCTTGGGTGTGATGTGTGTTATTGGTTT	2029	alpha-endosulfine isoform 6	4.09237	5.42564
ASHGA5P051303	0.017384	0.0591287	2.51197	down	protein_coding	NM_001031695	CCDS46700.1	RBFOX2	RefSeq	6997	chr22	-	36134782	36236630	CTCCCTTTAGTTCCTGGCTTCCCTTACCCTACTGCAGCCACCACGGCAGCCGCTTTCAGA	23543	RNA binding protein fox-1 homolog 2 isoform 1	7.00575	8.33457
ASHGA5P010983	0.021069	0.0666553	2.51048	down	protein_coding	NM_001143758	CCDS44495.1	LRRC27	RefSeq	1798	chr10	+	134145613	134166901	AGCAGAGACGTCCTTTCCTCCTCATTTTCCCTAGAGTATTCCAGGCCCTGACACGGTCAT	80313	leucine-rich repeat-containing protein 27 isoform b	4.97828	6.30624
ASHGA5P008065	0.00205553	0.0300877	2.5101	down	protein_coding	NM_001082959	CCDS45008.1	SCARB1	RefSeq	2630	chr12	-	125262173	125348519	TCCTGCTGCTGGTCCCTGTCATCTGCCAAATCCGGAGCCAAGGTCCTGAGGACACCGTGA	949	scavenger receptor class B member 1 isoform 2	5.33489	6.66263
ASHGA5P015312	0.0317055	0.0866605	2.50742	down	protein_coding	NM_001184748	CCDS53713.1	PAFAH1B2	RefSeq	2537	chr11	+	117014999	117047592	GCAGCCACAGGCGTGAGTCACCGCACCAGGCCATCTTCAGGTCATTTTAACAATACCCCT	5049	platelet-activating factor acetylhydrolase IB subunit beta isoform d	4.43348	5.75968
ASHGA5P040471	0.00496703	0.0338278	2.50649	down	protein_coding	NM_005582	CCDS3992.1	CD180	RefSeq	2725	chr5	-	66478103	66492617	TGATTCCATTTCTCAGCTCCAAGCATTAGGTAAACCCACCAAGCAATCCTAGCCTGTGAT	4064	CD180 antigen precursor	3.5714	4.89706
ASHGA5P049753	0.00548166	0.0343796	2.49835	down	protein_coding	NM_001144070	CCDS45739.1	ABCC3	RefSeq	1958	chr17	+	48712217	48745288	TCCACACCACAACCACCTTCACCTGGATGTGCAGCCCCTTCCTGGTGAGGCTTGGCACAG	8714	canalicular multispecific organic anion transporter 2 isoform 2	6.47082	7.7918
ASHGA5P032805	0.00153205	0.0279696	2.49258	down	protein_coding	ENST00000323675	CCDS42254.1	SPEM1	GENCODE	982	chr17	+	7323678	7324951	TGTCCTGTTGCTGCTGGGCCTCATCATCTGCATTAACATTAGCATCAATATAGTGACCCT	374768	spermatid maturation 1 [Source:HGNC Symbol;Acc:32429]	4.27962	5.59726
ASHGA5P037149	0.00169292	0.0287218	2.49132	down	protein_coding	ENST00000371015	CCDS13480.1	PHACTR3	GENCODE	2728	chr20	+	58179602	58422766	ACCCCAGCGTCCTCACCGACTCCTCGGCCACCTCCTCCGCGGACGCCGGGGAGAACCCAG	116154	phosphatase and actin regulator 3 [Source:HGNC Symbol;Acc:15833]	6.96946	8.28638
ASHGA5P006789	0.0115948	0.0475315	2.48736	down	protein_coding	NM_002026	CCDS2399.1	FN1	RefSeq	8449	chr2	-	216225178	216300791	CCGAATGTAGGACAAGAAGCTCTCTCTCAGACAACCATCTCATGGGCCCCATTCCAGGAC	2335	fibronectin isoform 3 preproprotein	4.45636	5.77098
ASHGA5P006251	0.00695606	0.0368111	2.48736	down	protein_coding	NM_005072	CCDS10855.1	SLC12A4	RefSeq	4773	chr16	-	67977376	68002597	GACTCGGACGGACATGGCAACCACAGAGAGAGCAGCCCTTTTCTTTCCCCCTTGGAGGCT	6560	solute carrier family 12 member 4 isoform a	7.26514	8.57975
ASHGA5P008730	0.000237124	0.0182999	2.48671	down	protein_coding	NM_019616	CCDS9529.1	F7	RefSeq	3078	chr13	+	113760101	113774995	TCTGCCTTCTGCTTGGGCTTCAGGGCTGCCTGGCTGCAGTCTTCGTAACCCAGGAGGAAG	2155	coagulation factor VII isoform b preproprotein	3.79748	5.11172
ASHGA5P002966	0.0137154	0.0519964	2.48512	down	protein_coding	ENST00000530656	CCDS7912.1	PRDM11	GENCODE	1536	chr11	+	45117356	45246459	ATGCTCACCTCTCTTCCTTTACCAGAGAGAGAAAGACAGAATGACCGAGAACATGAAGGA	56981	PR domain containing 11 [Source:HGNC Symbol;Acc:13996]	4.10365	5.41696
ASHGA5P011685	0.00327866	0.0326774	2.48507	down	protein_coding	NM_007265	CCDS7321.1	ECD	RefSeq	2280	chr10	-	74894281	74927853	GGCCAGAAAGTTCTCTTGCTATGAGCCCTGGTGAAGAAATCTTAACCTTATTACAGACAA	11319	protein SGT1 isoform 1	3.83363	5.14691
ASHGA5P010904	0.00103294	0.0253141	2.47838	down	protein_coding	ENST00000368100	CCDS30913.1	VSIG8	GENCODE	1818	chr1	-	159824105	159832447	TGTTTGTGTGGTGGAGGTGAAGGTCTCAGACTCCCGGCGTATAGGCGTGATCATCGGCAT	391123	V-set and immunoglobulin domain containing 8 [Source:HGNC Symbol;Acc:32063]	3.21572	4.52512
ASHGA5P051969	0.0135458	0.0516717	2.47818	down	protein_coding	NM_001145007	CCDS3541.1	MUC7	RefSeq	2504	chr4	+	71337674	71348714	TACACCAGCTCCACCATCTTCCTCAGCTCCACCAGAGACCACAGCTGCCCCACCCACACC	4589	mucin-7 precursor	7.43436	8.74364
ASHGA5P006929	0.000252671	0.0185551	2.47748	down	protein_coding	NM_024874	CCDS390.1	KIAA0319L	RefSeq	4822	chr1	-	35899090	36023037	CTGAGCCCCGTGTACTGGTTCTGCCTGTCTGGAGGGCCATGGAGAAGAGGCTGGGAGTCA	79932	dyslexia-associated protein KIAA0319-like protein	5.60947	6.91834
ASHGA5P002171	0.020864	0.0663155	2.47445	down	protein_coding	NM_005568	CCDS11316.1	LHX1	RefSeq	3431	chr17	+	35294771	35301915	AGCTCATCCCCAATGGTCCCTTCTCCTTCTACGGAGATTACCAGAGCGAGTACTACGGGC	3975	LIM/homeobox protein Lhx1	6.1158	7.42291
ASHGA5P033764	0.00585546	0.0347584	2.47404	down	protein_coding	ENST00000324750	CCDS11868.1	MC5R	GENCODE	1319	chr18	+	13825542	13826861	TAAGCACAAAGTGCTCCTCTCTGTGGCTCTGTTCTCCTTTGTTTGCTCACCTATGACAAA	4161	melanocortin 5 receptor [Source:HGNC Symbol;Acc:6933]	5.74494	7.05181
ASHGA5P010872	0.0196472	0.0636393	2.47346	down	protein_coding	NM_001077469	CCDS44261.1	NR1I3	RefSeq	1248	chr1	-	161199455	161208000	GGAGCCCGTGTGGGGTTCCAGGTAGAGTTTTTGGAGTTGCTCTTTCACTTCCATGGAACA	9970	nuclear receptor subfamily 1 group I member 3 isoform 6	4.40597	5.7125
ASHGA5P051747	0.0086694	0.0406795	2.47342	down	protein_coding	NM_005496	CCDS3189.1	SMC4	RefSeq	5297	chr3	+	160118346	160152741	CCGGCCCCAGCGACCATGCCCCGTAAAGGCACCCAGCCCTCCACTGCCCGGCGCAGAGAG	10051	structural maintenance of chromosomes protein 4	11.067	12.3735
ASHGA5P008700	0.00466561	0.0338278	2.47098	down	protein_coding	NM_133271	CCDS12908.1	FCAR	RefSeq	1383	chr19	+	55385548	55401839	GTAGTGACAGACTCCATCCACCAAGATTACACGACGCAGAACTTGATCCGCATGGCCGTG	2204	immunoglobulin alpha Fc receptor isoform c precursor	5.07981	6.3849
ASHGA5P037512	7.35494e-05	0.0133794	2.47069	down	protein_coding	ENST00000400365	CCDS42967.1	KRTAP10-12	GENCODE	873	chr21	+	46117086	46117959	AGACTGTCTGCTGCAAGCCTGTGTGCTGTATGCCCGTCTGCTGTGGGCCTTCTTCTTCAT	386685	keratin associated protein 10-12 [Source:HGNC Symbol;Acc:20533]	3.75134	5.05626
ASHGA5P016108	0.00285183	0.0318783	2.46713	down	protein_coding	NM_001025930	CCDS43048.1	TTLL3	RefSeq	3662	chr3	+	9851643	9878040	TCTGGGGAAGCCCGTCACCACTTCCCCAGCCTCCACACCAAGGCCCAGCTGCCTTCTCCC	26140	tubulin monoglycylase TTLL3	5.67206	6.9749
ASHGA5P055348	0.00156069	0.0280187	2.46555	down	protein_coding	NM_001040436	CCDS31770.1	YARS2	RefSeq	2173	chr12	-	32899477	32908887	AGGTGGGTGTGGTGGGAGCCTCTGCAATCCCAGCATTCCCTTCGTGCCGCTACCAAGATG	51067	"tyrosine--tRNA ligase, mitochondrial precursor"	6.08508	7.38699
ASHGA5P054734	0.0481323	0.114535	2.46148	down	protein_coding	NM_001080521		RASSF10	RefSeq	2698	chr11	+	13030969	13033653	GCCGCCCCAGCAGACCCCGGCCGGACCTGCCACCTGCGCCCTGGTTGCGCCATGGATCCT	644943	ras association domain-containing protein 10	7.70722	9.00675
ASHGA5P011007	0.00551813	0.0343796	2.46037	down	protein_coding	ENST00000368779	CCDS1021.1	LCE2A	GENCODE	592	chr1	+	152670839	152671918	GTGTGTGACCAGGGTTGAAAAAGTCGCACTGAGATGTCCTGCCAGCAAAACCAGCAGCAG	353139	late cornified envelope 2A [Source:HGNC Symbol;Acc:29469]	3.05902	4.3579
ASHGA5P026227	0.000935966	0.0247654	2.45863	down	protein_coding	ENST00000379554	CCDS41621.1	INSC	GENCODE	2954	chr11	+	15133969	15268754	GAAGGTCCAGGTGGCTGGGGTCTATGGGGAGTCCAGGAGTCCAGGAGGCTGTGCTGTGCC	387755	inscuteable homolog (Drosophila) [Source:HGNC Symbol;Acc:33116]	3.11461	4.41247
ASHGA5P009706	0.00389841	0.0329783	2.45829	down	protein_coding	NM_133172	CCDS4228.1	APBB3	RefSeq	2161	chr5	-	139937852	139944189	CCAAGGGCCGCCCCATCTCTGCCCCTGCTAGGGACTTCGCTTTTGTGGCAAGTGACAAAG	10307	amyloid beta A4 precursor protein-binding family B member 3 isoform c	6.72822	8.02588
ASHGA5P034159	0.0347736	0.0921536	2.45728	down	protein_coding	NM_001035516	CCDS42549.1	DMKN	RefSeq	613	chr19	-	35988118	35992813	GCCTCTGCTCTGCTCCTGCTCCTGCTGGGCCTGGCCTGGACCCAGGGGAGCCACGGCTGG	93099	dermokine isoform 1 precursor	7.04556	8.34262
ASHGA5P012908	0.0084313	0.0401166	2.44997	down	protein_coding	NM_006065	CCDS13019.1	SIRPB1	RefSeq	2469	chr20	-	1545028	1600689	TATCACCCATGAAGCAGCGCTGGCTCCTACTGCTCCACTCCTCGTAGCTCTCCTCCTGGG	10326	signal-regulatory protein beta-1 isoform 1 precursor	6.70262	7.99539
ASHGA5P053786	0.00171723	0.0288194	2.44369	down	protein_coding	NM_005421	CCDS6767.1	TAL2	RefSeq	656	chr9	+	108424737	108425385	CCTACCTCTGCCTATTTTAAATCCAGGTTCTGCATAAGACTTTTGGAGAAAAAATTCTAA	6887	T-cell acute lymphocytic leukemia protein 2	4.10239	5.39146
ASHGA5P046189	0.0205073	0.0655088	2.44305	down	protein_coding	NM_130777	CCDS35288.1	XAGE2	RefSeq	720	chrX	-	52380351	52387096	TGGGGTGGGGCGAGGCGGGGCACTGCAGCACACAACGCAGGCACCGACTTCAGTGTGCAT	9502	G antigen family D member 3	4.65761	5.9463
ASHGA5P034320	0.0128048	0.0501124	2.44241	down	protein_coding	ENST00000378486		PLCH2	GENCODE	4837	chr1	+	2407753	2436964	TACTCCTCTGGGTTGGAGGGAGTGTGGTGCTGTCTTCAGAGTGGCAGCTCGGCCCCCTGG	9651	"phospholipase C, eta 2 [Source:HGNC Symbol;Acc:29037]"	3.55603	4.84433
ASHGA5P035317	0.000159327	0.0157579	2.44202	down	protein_coding	NM_001077637		WTH3DI	RefSeq	3672	chr2	-	132118064	132121731	CACACACACAATGCTATGCTATGTTTAATAGCATTTCCCTGATTACCAATATTAGGCATT	150786	RAB6C-like	3.98582	5.2739
ASHGA5P001464	0.0434324	0.10726	2.44113	down	protein_coding	NM_021629	CCDS3230.1	GNB4	RefSeq	6428	chr3	-	179113875	179169371	CTCCCTCCAGCTGTTTTCACTCATTAGCTCCTGAGGTAAACAAATTGAAAAAATGAGCGA	59345	guanine nucleotide-binding protein subunit beta-4	6.01198	7.29952
ASHGA5P031565	0.0314715	0.0863918	2.43446	down	protein_coding	NM_001004067	CCDS42123.1	NOMO3	RefSeq	4336	chr16	+	16326388	16388668	GCGGCGGCTGGCGGCGGCGGTGGGGCGGGGCCTGGGCTGTCAGCCGGCCTAGGAGGAGGA	408050	nodal modulator 3 precursor	5.65735	6.94095
ASHGA5P018038	0.000562221	0.022199	2.4308	down	protein_coding	ENST00000448662	CCDS54825.1	SORBS2	GENCODE	4356	chr4	-	186506597	186732048	TGAAAGACCACCTCCTAAAAAGCCTCTGGACTATGTTCAAGATCATTCTTCTGGTGTTTT	8470	sorbin and SH3 domain containing 2 [Source:HGNC Symbol;Acc:24098]	3.33334	4.61477
ASHGA5P014171	0.033381	0.0898422	2.4307	down	protein_coding	NM_005134	CCDS42413.1	PPP4R1	RefSeq	3929	chr18	-	9546788	9614605	TGCTGTTGAGAATATGGACTCCACTCTTCACTATATTCACAGCGATTCAGACTTGAGCAA	9989	serine/threonine-protein phosphatase 4 regulatory subunit 1 isoform b	3.5423	4.82367
ASHGA5P011814	0.0389329	0.0997007	2.43034	down	protein_coding	NM_024820	CCDS35134.1	DENND1A	RefSeq	2166	chr9	-	126163869	126692417	GCCCTGAGCAAAACACCATTGCAACACCAGCTACACTCCACATCCTACAGAAAAGCATTA	57706	DENN domain-containing protein 1A isoform 2	6.0907	7.37186
ASHGA5P004314	0.0055531	0.0344297	2.42908	down	protein_coding	ENST00000289820	CCDS6018.1	NPM2	GENCODE	1100	chr8	+	21882353	21894408	CCGCTAGGAGCTGCCCGGCCAGCCCGCTTCTCTGCCCGGAGCCATGAATCTCAGTAGCGC	10361	nucleophosmin/nucleoplasmin 2 [Source:HGNC Symbol;Acc:7930]	5.38213	6.66254
ASHGA5P002274	0.0304379	0.0842128	2.42872	down	protein_coding	NM_001570	CCDS33697.1	IRAK2	RefSeq	3469	chr3	+	10206562	10285427	TGATTCAAAGGACTTCAGCACCTCCATTCCTAAGCAGGAAAAACTTTTGAGCTTGGCTGG	3656	interleukin-1 receptor-associated kinase-like 2	4.61895	5.89915
ASHGA5P054596	0.000582646	0.0224826	2.42634	down	protein_coding	NM_001001936	CCDS31286.1	AFAP1L2	RefSeq	3997	chr10	-	116054582	116164515	GGGCCTGTGACGTTAGGCACCACCGTGGACACCACCCACCTGGAGAATGTGAGCCCCCGC	84632	actin filament-associated protein 1-like 2 isoform 1	6.89596	8.17474
ASHGA5P049250	0.0171785	0.0587437	2.42478	down	protein_coding	NM_206999	CCDS45501.1	CNOT1	RefSeq	5221	chr16	-	58577056	58663790	AGCCCTTCGTGTAAGTTGGCTATTTCCTTGGTATAGGTACAAAACGTATTACTGCTTGTC	23019	CCR4-NOT transcription complex subunit 1 isoform b	5.07604	6.3539
ASHGA5P029610	0.00510985	0.0338278	2.42229	down	protein_coding	NM_001014450	CCDS30867.1	SPRR2F	RefSeq	657	chr1	-	153084612	153085989	AACCATTAGAGAATTCTGTTGATGTTTTCTGTGTCTGTCTGTCCCCTGGGCATGAGCTTC	6705	small proline-rich protein 2F	5.24864	6.52501
ASHGA5P010253	0.00026694	0.0187505	2.42211	down	protein_coding	NM_175635	CCDS6257.1	RUNX1T1	RefSeq	7237	chr8	-	92967194	93107490	ACTCACCGAGATCGTACTGAGAAGCACTCCACAATGCCAGACTCACCTGTGGATGTGAAG	862	protein CBFA2T1 isoform C	3.19707	4.47334
ASHGA5P037267	0.000574886	0.0223953	2.42137	down	protein_coding	NM_181602	CCDS13602.1	KRTAP6-1	RefSeq	219	chr21	-	31986004	31986223	CGCTCCCTCTGTGGCTATGGCTATGGATGCGGCTCTGGCTCTGGCTACTATTATTGAGGA	337966	keratin-associated protein 6-1	5.39386	6.66968
ASHGA5P037358	0.00495396	0.0338278	2.41928	down	protein_coding	NM_198694	CCDS42958.1	KRTAP10-5	RefSeq	918	chr21	-	45999563	46000481	AGTCCTGCTACGTGCCTGTCTGTTGCAAGCCTGTCTGCTTCAAACCCATCTGCTGTGTGC	386680	keratin-associated protein 10-5	4.93949	6.21407
ASHGA5P010532	0.00130926	0.0269444	2.41716	down	protein_coding	NM_024526	CCDS813.1	EPS8L3	RefSeq	2247	chr1	-	110292701	110306644	TTTCCCTTCGGCCCTCCAGCCCCAAACCTGCCCAGCCAGCCCTGAAAATGCAAGTCTTGT	79574	epidermal growth factor receptor kinase substrate 8-like protein 3 isoform c	8.93466	10.208
ASHGA5P055434	0.000330457	0.0192182	2.41645	down	protein_coding	NM_152860	CCDS44897.1	SP7	RefSeq	2995	chr12	-	53720359	53729537	CCCGGCTCAGCTCTCTCCATCTGCCTGGCTCCTTGGGACCCGTTCCCCAGCCTCAGGATG	121340	transcription factor Sp7	11.0832	12.3561
ASHGA5P013567	0.0194164	0.0631731	2.41015	down	protein_coding	NM_001099922	CCDS55477.1	ALG13	RefSeq	4179	chrX	+	110924345	111003875	GGCAGGCCAGTGATTGCCTCACCATCCTATCCATGCCATTCTGCTATTCCTCATGCTGGT	79868	UDP-N-acetylglucosamine transferase subunit ALG13 homolog isoform 1	4.86016	6.12928
ASHGA5P026595	0.00209865	0.0304543	2.40667	down	protein_coding	ENST00000398536	CCDS41682.1	KRTAP5-7	GENCODE	898	chr11	+	71238312	71239210	ATGAAGCCATATCTGCCTGCCTTTTCCTAAGGAGAGTCCACCCTAATTAATGTCCATTCC	440050	keratin associated protein 5-7 [Source:HGNC Symbol;Acc:23602]	5.33662	6.60366
ASHGA5P012749	0.0171668	0.0587234	2.40603	down	protein_coding	NM_002836	CCDS13038.1	PTPRA	RefSeq	3637	chr20	+	2844840	3019315	CAGCAACCACTCCAGAAACTTTCCCTCCTTCAGGTAATTCTGACTCGAAGGACAGAAGAG	5786	receptor-type tyrosine-protein phosphatase alpha isoform 1 precursor	6.05631	7.32297
ASHGA5P054936	0.0380014	0.0979556	2.40319	down	protein_coding	NM_006819	CCDS8058.1	STIP1	RefSeq	2219	chr11	+	63953586	63972020	ATTCGGTGATGACTTGTTCATCCCCCCTTCCCTTCGCCCTCATGTGGAAAGAGGAGCTGG	10963	stress-induced-phosphoprotein 1	9.70555	10.9705
ASHGA5P000700	0.0482393	0.114666	2.40276	down	protein_coding	ENST00000074304	CCDS46369.1	INPP4A	GENCODE	6752	chr2	+	99061320	99207496	CCTCCACTGCATGCCATCCTCATCTGACCACACATTGCAGTCCCCCTCCTGAAGAGTCCA	3631	"inositol polyphosphate-4-phosphatase, type I, 107kDa [Source:HGNC Symbol;Acc:6074]"	8.94575	10.2104
ASHGA5P013754	0.0383747	0.0986931	2.39514	down	protein_coding	NM_001040114	CCDS45423.1	MYH11	RefSeq	6903	chr16	-	15796991	15950887	GCCTCCTCCCACAAGGGCAAGAAAGACACAAGTATCACGCAAGGCCCATCTTTTGCCTAC	4629	myosin-11 isoform SM1B	6.17179	7.4319
ASHGA5P049067	0.0343323	0.0913644	2.39282	down	protein_coding	NM_001130006	CCDS45413.1	GSPT1	RefSeq	7166	chr16	-	11961984	12009825	GTCCACCACACACACGGCCCCCCCGATCATGGATCCGGGCAGTGGCGGCGGCGGCGGCGG	2935	eukaryotic peptide chain release factor GTP-binding subunit ERF3A isoform 2	9.50832	10.767
ASHGA5P003002	0.00074032	0.023569	2.39055	down	protein_coding	NM_000229	CCDS10854.1	LCAT	RefSeq	1354	chr16	-	67973786	67978015	GTCATCCTCGTGCCCGGCTGCCTGGGGAATCAGCTAGAAGCCAAGCTGGACAAACCAGAT	3931	phosphatidylcholine-sterol acyltransferase precursor	4.89033	6.14767
ASHGA5P013229	0.000972287	0.0250013	2.38969	down	protein_coding	NM_133274	CCDS42625.1	FCAR	RefSeq	1561	chr19	+	55385548	55401839	GGATCTACAGACTCCATCCACCAAGATTACACGACGCAGAACTTGATCCGCATGGCCGTG	2204	immunoglobulin alpha Fc receptor isoform f	5.0091	6.26593
ASHGA5P050499	0.00493558	0.0338278	2.38691	down	protein_coding	NM_014882	CCDS46312.1	ARHGAP25	RefSeq	2957	chr2	+	69001932	69053957	CATGTCCCTCGGTCAGTCGGCCTGTCTGTTCCTCTCTATAGCTCGGTCAAGGAGTGTGAT	9938	rho GTPase-activating protein 25 isoform b	7.128	8.38315
ASHGA5P012896	0.00110523	0.0255886	2.3867	down	protein_coding	NM_005511	CCDS6466.1	MLANA	RefSeq	1524	chr9	+	5890908	5909822	ATTAAGGAAGGTGTCCTGTGCCCTGACCCTACAAGATGCCAAGAGAAGATGCTCACTTCA	2315	melanoma antigen recognized by T-cells 1	5.85173	7.10675
ASHGA5P013893	0.000726406	0.023569	2.38668	down	protein_coding	NM_001164501	CCDS13898.1	EIF4ENIF1	RefSeq	3680	chr22	-	31835344	31885547	CCGCCCCTCAGTGCAGAGCATTGTAGACCAAGGAGCCATGGATAGGAGAAGTATGGGTGA	56478	eukaryotic translation initiation factor 4E transporter isoform a	5.13982	6.39482
ASHGA5P021168	0.0326458	0.088377	2.38286	down	protein_coding	NM_001164470	CCDS53638.1	MS4A12	RefSeq	1044	chr11	+	60260250	60274901	TTAAAGAAGAAGCAAAGGCACTAGGGTTTATTATCTCTGGCTCTCTCTCTGTGTCAGCAT	54860	membrane-spanning 4-domains subfamily A member 12 isoform 2	5.47591	6.7286
ASHGA5P049744	0.0388017	0.0995149	2.3824	down	protein_coding	NM_030802	CCDS11553.1	FAM117A	RefSeq	2385	chr17	-	47787686	47841518	TTGGGGGGCTGTGTGAGTCTCGCAGTGGGGCTGAGGCAGGCAGCCGGGAGAGCCATGGCG	81558	protein FAM117A	5.38986	6.64227
ASHGA5P000830	0.0119723	0.0483017	2.38169	down	protein_coding	NM_001145798	CCDS54409.1	CACNB4	RefSeq	7793	chr2	-	152689285	152955593	ATGCCCCCCAAGTCAGCGAATGAGGCACAGCAACCACTCCACAGAGAACTCTCCAATTGA	785	voltage-dependent L-type calcium channel subunit beta-4 isoform d	10.1375	11.3895
ASHGA5P049803	0.00244725	0.0313471	2.3814	down	protein_coding	NM_001317	CCDS11649.1	CSH1	RefSeq	934	chr17	-	61972267	61974021	TGCCACTCCAGTGCCCACCAGCCTTGTCCTAATAAAATTAAGTTGTATCATTTCATCTGA	1442	chorionic somatomammotropin hormone precursor	6.49809	7.7499
ASHGA5P042085	0.00184944	0.0290776	2.38022	down	protein_coding	NM_021189	CCDS1182.1	CADM3	RefSeq	3698	chr1	+	159141376	159172932	AACTCTGGCTCCACTCGACGAGGCCATCAGCTCCACAGTCTGGAGCAGCCCTGACATGCT	57863	cell adhesion molecule 3 isoform 1 precursor	5.76247	7.01357
ASHGA5P043904	0.0371979	0.0965575	2.37823	down	protein_coding	NM_001004023	CCDS31000.1	DYRK3	RefSeq	2301	chr1	+	206808880	206822542	ATCCTTAATCATTTAGAATTTTGCCTCCACCATCCACCAGAAAATGAAGTGGAAAGAGAA	8444	dual specificity tyrosine-phosphorylation-regulated kinase 3 isoform b	5.18506	6.43495
ASHGA5P011015	8.15527e-05	0.0143238	2.37673	down	protein_coding	NM_001004432	CCDS30855.1	LINGO4	RefSeq	2606	chr1	-	151772764	151777882	TGATGCCACCTTCCAGCTTCTCCGGACTGAAGAGGGAATGGATGCAGCCACAGCTCCAAA	339398	leucine-rich repeat and immunoglobulin-like domain-containing nogo receptor-interacting protein 4 precursor	3.80863	5.05761
ASHGA5P037593	0.0443586	0.108808	2.37528	down	protein_coding	NM_001128633	CCDS46669.1	RIMBP3C	RefSeq	5802	chr22	-	21899957	21905750	CTGGGAGGTTAAGGTTATCTGTCCATTGCCTTGTACGAAAGTCTCAAGAAAAGTCTACAT	150221	RIMS-binding protein 3C	5.80374	7.05184
ASHGA5P011408	0.00948023	0.0426842	2.37527	down	protein_coding	NM_015385	CCDS7442.1	SORBS1	RefSeq	5979	chr10	-	97071529	97321171	TGAATGGCTTGGCACCTGGCAGCAATGGGCAAGACAAAGACATGGATCTTACAAAAATCT	10580	sorbin and SH3 domain-containing protein 1 isoform 2	7.4088	8.6569
ASHGA5P007977	0.0012388	0.026401	2.37349	down	protein_coding	NM_138383	CCDS32476.1	MTSS1L	RefSeq	4977	chr16	-	70695106	70719954	TTCCCAGCTGAGGACCACCGTGCTGGCTGCTGTGGCCTTCCTGGATGCCTTCCAGAAAGT	92154	MTSS1-like protein	4.10695	5.35396
ASHGA5P037645	0.00482467	0.0338278	2.37283	down	protein_coding	NM_015370	CCDS13848.1	C22orf31	RefSeq	1070	chr22	-	29454659	29457907	ATTAAAGCACAAGGACGATTCAGTGATGAAAGCCACCCAGCAGGCCAGGAAAAGAAACTT	25770	uncharacterized protein C22orf31	3.64666	4.89327
ASHGA5P014181	0.00123519	0.026401	2.37264	down	protein_coding	NM_013945	CCDS44075.1	PAX7	RefSeq	2265	chr1	+	18957499	19062632	GTGCCCTCAGTGAGTTCGATTAGCCGCGTGCTCAGAATCAAGTTCGGGAAGAAAGAGGAG	5081	paired box protein Pax-7 isoform 2	3.45225	4.69874
ASHGA5P004394	0.0145686	0.0535198	2.37075	down	protein_coding	NM_002606	CCDS13690.1	PDE9A	RefSeq	2103	chr21	+	44073861	44195618	GCCTGCCTCGGAACACGACCATCTCCCTGCTGACCACCGACGACGCCATGGTCTCCATCG	5152	"high affinity cGMP-specific 3',5'-cyclic phosphodiesterase 9A isoform a"	7.65947	8.90481
ASHGA5P007171	0.00956769	0.0429181	2.37063	down	protein_coding	NM_001037165	CCDS34591.1	FOXK1	RefSeq	11191	chr7	+	4721929	4811074	AAGGCTGGCAGAATTCTATCCGGCACAACCTCTCTTTGAACCGTTACTTTATCAAAGTCC	221937	forkhead box protein K1	3.69045	4.93572
ASHGA5P018250	0.0257069	0.0754468	2.36609	down	protein_coding	NM_001137560	CCDS47437.1	TMEM151B	RefSeq	4637	chr6	+	44238479	44247182	TATACCACCACCCAGGTCTACCACGAACGCGTCAACACGCACGTGGCGGAGGCTGAGTTC	441151	transmembrane protein 151B	5.52749	6.76999
ASHGA5P051782	0.0218963	0.068255	2.36548	down	protein_coding	NM_181361	CCDS3223.1	KCNMB2	RefSeq	2543	chr3	+	178254223	178562217	TCTTCCGGGGAAAAGCTCCTCCTCTACCACACAGAAGAGACAATAAAAATCAATCAGAAG	10242	calcium-activated potassium channel subunit beta-2	4.96311	6.20524
ASHGA5P001684	0.0114644	0.0472219	2.36434	down	protein_coding	NM_000905	CCDS5387.1	NPY	RefSeq	576	chr7	+	24323806	24331484	GCCAGCCACCATGCTAGGTAACAAGCGACTGGGGCTGTCCGGACTGACCCTCGCCCTGTC	4852	pro-neuropeptide Y preproprotein	4.46376	5.7052
ASHGA5P002086	0.000929641	0.0247125	2.36379	down	protein_coding	NM_012321	CCDS12374.1	LSM4	RefSeq	1825	chr19	-	18417039	18434001	GTCCCCGCCGGCACCATGCTTCCCTTGTCACTGCTGAAGACGGCTCAGAATCACCCCATG	25804	U6 snRNA-associated Sm-like protein LSm4 isoform 1	8.58325	9.82435
ASHGA5P006831	0.00557517	0.0344308	2.36142	down	protein_coding	NM_153823	CCDS44835.1	GSG1	RefSeq	2544	chr12	-	13236470	13248740	TTTCATTGAACTTACACCACCAGCCAAGAGAGAAATCCTATGGTTATCCCTGGGAACGCA	83445	germ cell-specific gene 1 protein isoform 2	3.08281	4.32247
ASHGA5P008098	0.00588235	0.0347584	2.36067	down	protein_coding	NM_001005388	CCDS53460.1	NFASC	RefSeq	10351	chr1	+	204797781	204991950	CCAACCGCAGCTCCTCCCACATTGCCCCCGACTACCGTGGGTGCGACGGGCGCTGTGAGC	23114	neurofascin isoform 1 precursor	6.58576	7.82496
ASHGA5P039360	0.00403421	0.0330909	2.36024	down	protein_coding	NM_025221	CCDS43216.1	KCNIP4	RefSeq	2361	chr4	-	20730238	20884333	AGCGGCTCATGAAGCTCTTGCCCTGCTCAGCTGCCAAAACGTCGTCTCCTGCTATTCAAA	80333	Kv channel-interacting protein 4 isoform 1	5.78024	7.01917
ASHGA5P054273	0.000611947	0.0230282	2.35968	down	protein_coding	NM_018212	CCDS31040.1	ENAH	RefSeq	13109	chr1	-	225674533	225840845	CTCGGCGCCTTCTGCGTCTCCCGGCTGGTGGGGAAGCCTCTGCGCCGCCGGCACCATGAG	55740	protein enabled homolog isoform b	3.66316	4.90175
ASHGA5P045499	0.0120004	0.0483601	2.35828	down	protein_coding	NM_014908	CCDS6915.1	DOLK	RefSeq	2267	chr9	-	131707808	131710012	ATGCCCACGTGACCGCTCGCCCCCGGACCCGGAGCGTGGGCGGGGATTTCGTCACGTGAC	22845	dolichol kinase	4.2179	5.45564
ASHGA5P012508	0.00392553	0.0329783	2.35776	down	protein_coding	ENST00000378679	CCDS54902.1	SHROOM1	GENCODE	4019	chr5	-	132157832	132166590	GAGGGGAAGTGACCCACGCAGCCACCCAGCCTCAGCACTCATCTGCGCAGCCATGGAGGC	134549	shroom family member 1 [Source:HGNC Symbol;Acc:24084]	6.01087	7.24828
ASHGA5P013830	0.0197848	0.0639227	2.35434	down	protein_coding	NM_152430	CCDS31358.2	OR51E1	RefSeq	3130	chr11	+	4665155	4676716	TACGGTTGAGCCTCTACCTGCCTGGTGCTGGTCACAGTTCAGCTTCTTCATGATGGTGGA	143503	olfactory receptor 51E1	6.62332	7.85864
ASHGA5P001729	0.00467339	0.0338278	2.35402	down	protein_coding	NM_001164309	CCDS12860.1	ZNF415	RefSeq	2418	chr19	-	53611131	53636171	GTCTCCCTGGATCTGTCTCGTAACTGTGTAATCAAGGAACTAGCACCACAACAGGAAGGT	55786	zinc finger protein 415 isoform 2	5.48864	6.72377
ASHGA5P008814	0.0176118	0.0595886	2.35329	down	protein_coding	NM_017974	CCDS2502.2	ATG16L1	RefSeq	3354	chr2	+	234160216	234204320	GAGCAGCCACGAGACGCTCTGTCTCTTCCTTCCCAGTCCCCCAGGACAATGTGGATACTC	55054	autophagy-related protein 16-1 isoform 2	6.39778	7.63246
ASHGA5P053047	0.0192657	0.0628633	2.35279	down	protein_coding	NM_001077480	CCDS41430.1	NR1I3	RefSeq	1399	chr1	-	161199455	161208000	TCTCCCACAGTGGGGTTCCAGGTAGAGTTTTTGGAGTTGCTCTTTCACTTCCATGGAACA	9970	nuclear receptor subfamily 1 group I member 3 isoform 2	4.31548	5.54985
ASHGA5P033091	0.00733362	0.037674	2.34919	down	protein_coding	NM_000964	CCDS11366.1	RARA	RefSeq	3301	chr17	+	38465422	38513895	TCAATGGGTACCCGGTGCCTCCCTACGCCTTCTTCTTCCCCCCTATGCTGGGTGGACTCT	5914	retinoic acid receptor alpha isoform 1	9.4004	10.6326
ASHGA5P055609	0.00553196	0.0343832	2.34692	down	protein_coding	NM_031954	CCDS9128.1	KCTD10	RefSeq	4057	chr12	-	109886459	109915155	GGTGTTTCCTGCCTCTCTCAGTCCGGGTTTGGAGACTCCTGCGTCCTCCGACTTTTCATG	83892	BTB/POZ domain-containing adapter for CUL3-mediated RhoA degradation protein 3	6.09842	7.32919
ASHGA5P047668	0.00888961	0.0412375	2.3467	down	protein_coding	NM_001083913	CCDS44473.1	WBP1L	RefSeq	4123	chr10	+	104503726	104576021	GCGCTCCTGCTCCTCCAGGCGCTGCCCAGCCCCTTGTCAGCCAGGGCTGAACCCCCGCAG	54838	WW domain binding protein 1-like isoform 1 precursor	10.8814	12.112
ASHGA5P008374	0.000298938	0.0187505	2.34464	down	protein_coding	NM_007135	CCDS6871.1	ZNF79	RefSeq	2099	chr9	+	130186652	130207651	GAGGAAGGAGTACTGCCTTCCCCAGGCCCTGCCCTTCCCCAAGAGGAAAACACAGGAGAG	7633	zinc finger protein 79	7.79052	9.01989
ASHGA5P008256	0.00348036	0.0328172	2.34013	down	protein_coding	NM_001164749	CCDS53891.1	NPAS3	RefSeq	5939	chr14	+	33408458	34273382	GGCGAGAACGAATAACTGCCCAGCATCCTCTGCCCAACCAATCAGAATGTAGGAAAATCT	64067	neuronal PAS domain-containing protein 3 isoform 1	4.94804	6.17463
ASHGA5P050268	0.0166241	0.057602	2.33995	down	protein_coding	NM_012423	CCDS12768.1	RPL13A	RefSeq	1196	chr19	+	49990810	49995564	AAGGGATAAGAAACCCTGCGACAAAACCTCCTCCTTTTCCAAGCGGCTGCCGAAGATGGC	23521	60S ribosomal protein L13a isoform 1	5.2642	6.49068
ASHGA5P026920	0.00120613	0.0263666	2.3381	down	protein_coding	NM_021978	CCDS8487.1	ST14	RefSeq	3319	chr11	+	130029681	130080257	AAATGAGAATTTTGTGGATGCCTACGAGAACTCCAACTCCACTGAGTTTGTAAGCCTGGC	6768	suppressor of tumorigenicity 14 protein	6.04564	7.27097
ASHGA5P049881	0.000901268	0.0245605	2.33779	down	protein_coding	NM_001164638	CCDS54174.1	ENDOV	RefSeq	1288	chr17	+	78388966	78404171	CAGGTGAGGGCCAGCCCCCACAGGACCACAGCCCAGGCCCCAGGACAGCCCCAAGGCCAG	284131	endonuclease V isoform 3	6.44415	7.6693
ASHGA5P031481	0.00521851	0.0340557	2.33735	down	protein_coding	NM_145252	CCDS10479.2	ZG16B	RefSeq	846	chr16	+	2880172	2882285	CCCCACGGCCAGCTCCTTCCTGTTCCCCTGGCGGCCCCTCGCTTCTTCCTTCTGGATGGG	124220	zymogen granule protein 16 homolog B precursor	9.44569	10.6706
ASHGA5P039823	0.000980986	0.0250013	2.33667	down	protein_coding	NM_001256861		LOC100287441	RefSeq	1593	chr4	+	9269344	9270937	ACAAGTGTGGGATGAAGAACCATCATCCTGAACAGCAAAGCTCCCTGCTAAAACTCTCTT	100287441	ubiquitin carboxyl-terminal hydrolase 17-like	3.66506	4.88951
ASHGA5P006578	0.0291686	0.0819246	2.3327	down	protein_coding	NM_002113	CCDS1386.1	CFHR1	RefSeq	1312	chr1	+	196788860	196801319	GGCTGGTCCACCCCTCCCAAATGCAGGTCCACTGACACTTCCTGTGTGAATCCGCCCACA	3078	complement factor H-related protein 1 precursor	9.86277	11.0848
ASHGA5P051180	0.000245774	0.0184096	2.33034	down	protein_coding	NM_033070	CCDS33595.1	CECR5	RefSeq	1809	chr22	-	17618409	17640169	ACGGCGACGGCCGGATGGCTGCGTGGGGCTGTGTGGCTGCGCTCGGCGCGGCGCGTGGGC	27440	cat eye syndrome critical region protein 5 isoform 2 precursor	3.44967	4.67021
ASHGA5P001490	0.00264399	0.0317647	2.32832	down	protein_coding	NM_013392	CCDS1753.1	NRBP1	RefSeq	2212	chr2	+	27651472	27665124	AAGATTGGCTCTGTGGCTCCTGACACTATCAACAATCATGTGAAGACTTGTCGAGAAGAG	29959	nuclear receptor-binding protein	4.04455	5.26384
ASHGA5P004180	0.0161616	0.0566101	2.32791	down	protein_coding	NM_182947	CCDS8947.1	ARHGEF25	RefSeq	2563	chr12	+	58005217	58011028	GGGGGACGTGAATCCTATTCCATTGCGGGCAGTGAGGGGAGTATATCGGCTTCTGCTGCC	115557	rho guanine nucleotide exchange factor 25 isoform 1	4.29281	5.51184
ASHGA5P006053	0.0139566	0.0524439	2.32667	down	protein_coding	NM_138415	CCDS14061.1	PHF21B	RefSeq	3671	chr22	-	45277042	45405581	TGACAACAAGCCTCCTCCACGCCTCCTCTCTTCCCCTCACCCCGCAACCCATCACTGTCC	112885	PHD finger protein 21B isoform 1	10.8729	12.0912
ASHGA5P054478	0.000229752	0.0182999	2.32495	down	protein_coding	NM_020999	CCDS31212.1	NEUROG3	RefSeq	1255	chr10	-	71331790	71333210	AGATTTTCTGTGAAAGGACCTGTCTGTCGCTGGGCTGTGGGTGCTAAGGGTAAGGGAGAG	50674	neurogenin-3	3.78167	4.99887
ASHGA5P045481	0.00821665	0.039695	2.32387	down	protein_coding	ENST00000373314	CCDS35144.1	FAM129B	GENCODE	3760	chr9	-	130267617	130341268	AACTGGGCCAGTTCCGGTCCCTTCCTTTTGGGGCTCTCACTCTGGAGGATGGGGTGGATG	64855	"family with sequence similarity 129, member B [Source:HGNC Symbol;Acc:25282]"	5.92051	7.13704
ASHGA5P026997	0.00387784	0.0329783	2.32343	down	protein_coding	ENST00000360168	CCDS53738.1	SCNN1A	GENCODE	3481	chr12	-	6456008	6484390	CCAGAGCTCAGCCTTGACCCTGACCCTTGCTCTCCCCAATCCACTCCGGGGCTCATGAAG	6337	"sodium channel, non-voltage-gated 1 alpha subunit [Source:HGNC Symbol;Acc:10599]"	8.25519	9.47145
ASHGA5P013628	0.0442579	0.10864	2.32245	down	protein_coding	NM_001144942	CCDS45636.1	RAB34	RefSeq	1761	chr17	-	27041298	27044908	TGTGCTTCTCTTCCTTACCCCTGCTCAGTATGCGCTGATGGAGAAAGACGCCCTCCAGGT	83871	ras-related protein Rab-34 isoform 4	5.79643	7.01208
ASHGA5P003431	0.00117585	0.0261523	2.32236	down	protein_coding	NM_020686	CCDS10534.1	ABAT	RefSeq	4814	chr16	+	8768443	8878432	GGGCCTGGAGGGTGGCAGCACGCAAAGGGTGTCCCTGTCCCTCAAGGGGTCATGGCCTCC	18	"4-aminobutyrate aminotransferase, mitochondrial precursor"	4.11278	5.32838
ASHGA5P010521	0.00439278	0.0334484	2.32072	down	protein_coding	NM_145312	CCDS7205.2	ZNF485	RefSeq	2072	chr10	+	44101854	44113352	ATCTGGTGTCTGTGGGGCTTCTCTCTTCCAAACCAAAACTAATTACTCAGTTGGAGCAAG	220992	zinc finger protein 485	4.06277	5.27735
ASHGA5P051964	0.00585884	0.0347584	2.31318	down	protein_coding	ENST00000305107	CCDS43234.1	UGT2B4	GENCODE	2103	chr4	-	70345882	70361626	ATGAGGTGACTGTATTGGCATCTTCAGCTTCCATTTCTTTCGATCCCAACAGCCCATCTA	7363	"UDP glucuronosyltransferase 2 family, polypeptide B4 [Source:HGNC Symbol;Acc:12553]"	3.05794	4.26782
ASHGA5P021234	0.000425184	0.0211462	2.31059	down	protein_coding	NM_001135748	CCDS47802.1	NEIL2	RefSeq	2016	chr8	+	11627171	11644854	CCCAGGTGAGGTTGGTCCTGCACTTTGGTGGTGGTGGCTTCCTGGCATTTTATAATTGTC	252969	endonuclease 8-like 2 isoform c	4.18402	5.39229
ASHGA5P007420	0.0297787	0.0830601	2.30958	down	protein_coding	NM_001135054	CCDS31325.1	SIGIRR	RefSeq	1761	chr11	-	405715	414999	CGGCTCCGTGACTCCTTCCTCCGATTTTTGGAAAGAAGTGCAGCTGGCGCTGCCGCGGAA	59307	single Ig IL-1-related receptor	5.66423	6.87186
ASHGA5P010736	0.00635224	0.0354584	2.30836	down	protein_coding	NM_152491	CCDS1460.1	PM20D1	RefSeq	2200	chr1	-	205797149	205819276	AACTGGCAAATGAGTTTCCCTTCCCTGTCAATATAATCCTGAGCAACCCATGGCTATTTG	148811	probable carboxypeptidase PM20D1 precursor	5.45047	6.65734
ASHGA5P055714	0.000788389	0.023569	2.30471	down	protein_coding	NM_170683	CCDS31930.1	P2RX2	RefSeq	1908	chr12	+	133195402	133198972	TTATTAATCTGGCCACAGCTCTGACTTCCGTCGGGGTGGTAAGGAACCCTCTCTGGGGTC	22953	P2X purinoceptor 2 isoform D	6.85527	8.05985
ASHGA5P009496	0.000193494	0.0169924	2.30298	down	protein_coding	NM_174983	CCDS42465.1	MFSD12	RefSeq	2138	chr19	-	3544196	3557571	CTGCGACGCTGGGACCGTGATGCCCGGCCCTGACTCCTGACAGCCTCCTGCACCTGTGCA	126321	major facilitator superfamily domain-containing protein 12 isoform c	6.20349	7.407
ASHGA5P048878	0.00552462	0.0343796	2.29941	down	protein_coding	NM_022480	CCDS10339.1	KLHL25	RefSeq	3683	chr15	-	86302558	86338189	GCCTTTGTCAGCACCTGGAAGCACCTGCCCGCGTGAGGAGCACCTGCTGAGCCCAGCCAG	64410	ectoderm-neural cortex protein 2	6.24003	7.44129
ASHGA5P009128	0.0263545	0.0768165	2.29911	down	protein_coding	NM_001135	CCDS53971.1	ACAN	RefSeq	8543	chr15	+	89346673	89418585	TGTAAAAAGGGCACAGCCACCACCTACAAACGCAGACTACAGAAGCGGAGCTCACGGCAC	176	aggrecan core protein isoform 1 precursor	3.88128	5.08235
ASHGA5P018255	0.0092492	0.042082	2.29886	down	protein_coding	NM_001136036	CCDS44348.1	ZNF692	RefSeq	2208	chr1	-	249144202	249153125	TGCTTCTGTCTGCCTGCCTCCCACCCGACGACACTCACATGCCTCTGGTGCACATGGCTT	55657	zinc finger protein 692 isoform 1	8.90955	10.1105
ASHGA5P038119	0.0469191	0.11245	2.29721	down	protein_coding	NM_004628	CCDS46763.1	XPC	RefSeq	3729	chr3	-	14186647	14220172	AAAGTACAGCCTTCTCTCGATCTCTTCTGCCTGTGAAGCCAGTGGAGATAGAGATTGAAA	7508	DNA repair protein complementing XP-C cells isoform 1	4.20441	5.40429
ASHGA5P051336	0.00903825	0.0416146	2.29395	down	protein_coding	NM_003932	CCDS14006.1	ST13	RefSeq	3214	chr22	-	41220600	41252687	CCGCCCCCTTCTGCGCGGTCACGCCGAGCCAGCGCCTGGGCCTGGAACCGGGCCGTAGCC	6767	hsc70-interacting protein	6.78748	7.98531
ASHGA5P038634	0.00800839	0.0392949	2.292	down	protein_coding	ENST00000392432	CCDS54699.1	TMEM44	GENCODE	2490	chr3	-	194308401	194354150	GTCTCCCTCACGTTCTCCCAGCGGACATTGGCGAGCCGCTGCCCAGCGTCAGGTGCTGGG	93109	transmembrane protein 44 [Source:HGNC Symbol;Acc:25120]	6.84483	8.04143
ASHGA5P012497	0.00326938	0.0326774	2.29145	down	protein_coding	NM_001100873	CCDS42201.1	C16orf46	RefSeq	1931	chr16	-	81087101	81110872	GGCCCCACAGCAAGAAGATGTTAAAAACTTTAAGCAAGCATCACAGTAATGGATCTCTGT	123775	uncharacterized protein C16orf46 isoform 1	3.70138	4.89764
ASHGA5P021455	0.00159322	0.0280187	2.28785	down	protein_coding	NM_001256795		LOC100129083	RefSeq	729	chr19	+	51919159	51920679	GTCCACATGGCAGCTTCCTCTCTCCACCCGAAAGAAGTACTGTGACTCATCCTGCATCTG	100129083	uncharacterized protein LOC100129083	6.71381	7.9078
ASHGA5P000768	0.00302979	0.0321505	2.2864	down	protein_coding	NM_001218	CCDS10185.1	CA12	RefSeq	3992	chr15	-	63615729	63674075	CTGAGTCTGGGCATCATCCTCTCACTGGCCCTGGCTGGCATTCTTGGCATCTGTATTGTG	771	carbonic anhydrase 12 isoform 1 precursor	6.76287	7.95595
ASHGA5P046544	0.00100204	0.0252045	2.28291	down	protein_coding	NM_003147	CCDS14345.1	SSX2	RefSeq	1466	chrX	+	52780307	52790617	TCCCCTCATCCGATTCCCCTGTAGCAGTCACTGACAGTTAATAAACCTTTGCAAACGTTC	6757	protein SSX2 isoform a	6.19023	7.3811
ASHGA5P005629	0.0273945	0.0786992	2.2829	down	protein_coding	NM_025124	CCDS8167.1	TMEM134	RefSeq	930	chr11	-	67231818	67236731	TGCTGCTGGGGCTGGTGCTGATCCTGGTCGGCGTGGGACTGGAGGCGACCCCCTCTCCAG	80194	transmembrane protein 134 isoform a	9.077	10.2679
ASHGA5P006857	0.00108323	0.0254796	2.28169	down	protein_coding	NM_013993	CCDS34385.1	DDR1	RefSeq	3877	chr6	+	30852326	30867933	AAACCCACCAACACCCAGGCCTACAGTGGGGACTATATGGAGCCTGAGAAGCCAGGCGCC	780	epithelial discoidin domain-containing receptor 1 isoform 2 precursor	4.01989	5.20999
ASHGA5P047805	0.00454248	0.033633	2.28092	down	protein_coding	ENST00000397566	CCDS7705.1	IRF7	GENCODE	2051	chr11	-	612554	615728	GATGCCAGTCCCCGAGCGCCCTGCAGCCGGCCCTGACTCTCCGCGGCCGGGCACCCGCAG	3665	interferon regulatory factor 7 [Source:HGNC Symbol;Acc:6122]	8.64378	9.8334
ASHGA5P017764	0.00115402	0.0260089	2.27977	down	protein_coding	NM_001081461	CCDS42383.1	JMJD6	RefSeq	5445	chr17	-	74708913	74722881	GCTCCTCCAGGATTAGGGACACTTGTGGAGGCCGGGCTCACCCCTGAGCAGATAAAGAGA	23210	bifunctional arginine demethylase and lysyl-hydroxylase JMJD6 isoform 1	3.66709	4.85597
ASHGA5P052357	0.000363701	0.0197382	2.27964	down	protein_coding	ENST00000368427	CCDS1080.1	LENEP	GENCODE	649	chr1	+	154966061	154966791	TGTTGCCCACATGCAGCCCCGGACACAGCCCCTAGCCCAAACCCTACCCTTCTTCCTCGG	55891	lens epithelial protein [Source:HGNC Symbol;Acc:14429]	7.84987	9.03867
ASHGA5P000734	0.0010929	0.0254961	2.27959	down	protein_coding	NM_005919	CCDS12394.1	MEF2BNB-MEF2B	RefSeq	1978	chr19	-	19256375	19303400	GCCTCCGCCAACCCAGACAAAGATCATTCCACTCAGCCTGGGACGATGGGGAGGAAAAAA	4207	myocyte enhancer factor 2B isoform b	6.1309	7.31968
ASHGA5P049463	0.000619389	0.0230282	2.27689	down	protein_coding	NM_001181	CCDS32544.1	ASGR2	RefSeq	1456	chr17	-	7004640	7018130	AGCTTCAACATCCTGCTGCTGGTGGTCATCTGTGTGACTGGGTCCCAAAGTGAGGGTCAC	433	asialoglycoprotein receptor 2 isoform a	3.39148	4.57854
ASHGA5P003619	0.00460872	0.0338278	2.27616	down	protein_coding	NM_020463	CCDS1855.1	SMEK2	RefSeq	4270	chr2	-	55775513	55844796	ATTTGTCCCGGTGCCCTTCGCTTTATGAGGCGGATAATTGGACTTAAAGATGAATTTTAT	57223	serine/threonine-protein phosphatase 4 regulatory subunit 3B isoform 2	6.13886	7.32547
ASHGA5P050054	7.29494e-05	0.0133794	2.27421	down	protein_coding	ENST00000375190	CCDS42467.1	TBXA2R	GENCODE	2601	chr19	-	3594503	3606831	CCCGGCCCAGGTCGCTGTCCCTCCAGCCCCAGCTCACGCAGCGCTCCGGGCTGCAGTAGG	6915	thromboxane A2 receptor [Source:HGNC Symbol;Acc:11608]	7.1547	8.34007
ASHGA5P054817	0.000129094	0.0145843	2.27079	down	protein_coding	NM_003654	CCDS7913.1	CHST1	RefSeq	3947	chr11	-	45669238	45687206	AAGCAGCCCCATGAAGGTGCCCAGCCATGCAATGTTCCTGGAAGGCCGTCCTCCTCCTTG	8534	carbohydrate sulfotransferase 1 precursor	4.56182	5.74501
ASHGA5P034459	0.00304372	0.0321842	2.2675	down	protein_coding	NM_001111309	CCDS45963.1	PDE4A	RefSeq	4503	chr19	+	10543110	10580307	GACCCACTTCCCCTTCAGCGATGAGGACACCCGTCGGCACCCTCCGGGCAGATCTGTCAG	5141	"cAMP-specific 3',5'-cyclic phosphodiesterase 4A isoform 3"	10.3024	11.4835
ASHGA5P051874	0.00469763	0.0338278	2.26735	down	protein_coding	NM_001120	CCDS3365.1	MFSD10	RefSeq	1969	chr4	-	2932287	2935964	GCACCCCACCCAGGCCAGGTCAGAGCAGCCCACCATGGGATGGGGAGGGGGTGGAGGCTG	10227	major facilitator superfamily domain-containing protein 10	7.05443	8.23544
ASHGA5P002683	0.00678352	0.0363557	2.26663	down	protein_coding	ENST00000261862	CCDS10238.2	THSD4	GENCODE	9145	chr15	+	71433787	72075722	ATGGGGTCTCTCAGTGTCCTGTGTTTCCTTCTGCTGCTTGGATTCCAGTTCGTCTGCCCA	79875	"thrombospondin, type I, domain containing 4 [Source:HGNC Symbol;Acc:25835]"	5.46468	6.64523
ASHGA5P004358	0.0071746	0.0373087	2.26462	down	protein_coding	ENST00000290691	CCDS13811.1	RGL4	GENCODE	2885	chr22	+	24033047	24041363	TGCCCCTTCCAGGACAGCACTGATGGCTTACGCACCATCACCTCCATTTTGTTCAACTGG	266747	ral guanine nucleotide dissociation stimulator-like 4 [Source:HGNC Symbol;Acc:31911]	5.51888	6.69814
ASHGA5P053667	0.000514247	0.0216207	2.26461	down	protein_coding	NM_001135005	CCDS47959.1	DNAJB5	RefSeq	2817	chr9	+	34990266	34998430	CCACCCCCAGCAGCACCCCCACTGCAGGCCCGAGGAGCTTTCCGGAGCTTCCCACACTCC	25822	dnaJ homolog subfamily B member 5 isoform 1	11.3394	12.5187
ASHGA5P009249	0.00278723	0.0318783	2.26417	down	protein_coding	NM_021178	CCDS9547.1	CCNB1IP1	RefSeq	1505	chr14	-	20779526	20801471	GCGTTTTTCTTTTATGGCCTCTCTTCAGCTTCTGGAGACCTCACTATCCTATTATGTCTT	57820	E3 ubiquitin-protein ligase CCNB1IP1	3.77621	4.95519
ASHGA5P005761	0.045579	0.110696	2.26401	down	protein_coding	NM_030963	CCDS5136.1	RNF146	RefSeq	2400	chr6	+	127587982	127609705	TGATTTGCAGGATGGCTGGCTGTGGTGAAATTGATCATTCAATAAACATGCTTCCTACAA	81847	E3 ubiquitin-protein ligase RNF146 isoform a	5.87497	7.05385
ASHGA5P011450	0.0209213	0.0663754	2.26049	down	protein_coding	NM_002979	CCDS572.1	SCP2	RefSeq	2725	chr1	+	53392900	53517289	ATTCAGGGTGGTGTGGCAGAATGTGTCTTGGCTCTTGGGTTTGAGAAGATGAGTAAGGGA	6342	non-specific lipid-transfer protein isoform 1 proprotein	3.73192	4.90856
ASHGA5P017496	0.00400974	0.0330479	2.25868	down	protein_coding	NM_199183	CCDS46815.1	PRSS45	RefSeq	962	chr3	-	46783580	46786245	TGTCACCTTCAGCTCCACAGCCAACTCCATGCTGACCCCAGAGCTGCAGGAGGCTGAGGT	377047	serine protease 45	5.67205	6.84753
ASHGA5P037579	0.00887253	0.0411774	2.25845	down	protein_coding	NM_001039775		AIM1L	RefSeq	5245	chr1	-	26648349	26680621	TGAAGGGAGCCCCATCTCATCTCTCACCCAGAAAGAGGTTGTGCAGGACCCTGATGCTCT	55057	absent in melanoma 1-like protein	5.06882	6.24415
ASHGA5P040809	0.00164564	0.0285281	2.25752	down	protein_coding	NM_001447	CCDS4317.1	FAT2	RefSeq	14565	chr5	-	150883652	150948505	ATTGCCAACATTAACCACCATCGGCCCCAGTTTCTGGAAACTCGTTATGAAGTCAGAGTT	2196	protocadherin Fat 2 precursor	4.1928	5.36754
ASHGA5P006232	0.00663349	0.0360243	2.25617	down	protein_coding	NM_001145400	CCDS45536.1	ADAD2	RefSeq	2076	chr16	+	84224722	84230772	CAGCCACCAGGTCCCTGCTTCCCCTTCTCGGTGAGCGCGGAACTGGATGGGGTGGTCTGC	161931	adenosine deaminase domain-containing protein 2 isoform 2	6.4523	7.62618
ASHGA5P054290	0.00273375	0.0318783	2.25615	down	protein_coding	NM_001025247	CCDS31051.1	TAF5L	RefSeq	4139	chr1	-	229734940	229761794	GTGTCCCGCATCCATTTGGCTTGTGATATTCTGGAGGAGGAGGTATGAATACCATTTTTT	27097	TAF5-like RNA polymerase II p300/CBP-associated factor-associated factor 65 kDa subunit 5L isoform b	4.33124	5.5051
ASHGA5P032412	0.0251673	0.074356	2.25446	down	protein_coding	NM_033060		KRTAP4-1	RefSeq	754	chr17	-	39340351	39341147	ACTCTTGTTGTGGCTCTGTCTGCTCTGACCAGGGCTGTGATCAAGGCCTCTGCCAAGAGA	85285	keratin-associated protein 4-1	5.15223	6.32501
ASHGA5P035112	0.017431	0.05919	2.25013	down	protein_coding	NM_001965	CCDS1925.2	EGR4	RefSeq	2379	chr2	-	73518056	73520829	TTACTCGCTGGGCCTCTCCTTCGCTTCTCTCTGAGCAAGAGATGGGTTTATGGGTTGGGG	1961	early growth response protein 4	5.85964	7.02965
ASHGA5P052777	0.000253338	0.0185551	2.2487	down	protein_coding	NM_001123226	CCDS47452.1	MTO1	RefSeq	3048	chr6	+	74171453	74211179	GACTCCACCCCGAATTGCCAAAGAGTCCATTAATTTCAGTATTCTAAACAAGCATATACC	25821	"protein MTO1 homolog, mitochondrial isoform c"	6.72762	7.89671
ASHGA5P004353	0.000561839	0.022199	2.24744	down	protein_coding	NM_007185	CCDS1002.1	CELF3	RefSeq	5593	chr1	-	151672533	151689290	CCATCCTCAGGAACCAGCACCCCTCCTGCCATCGCTGCCACGCCTGTCTCTGCCATTCCG	11189	CUGBP Elav-like family member 3 isoform 1	8.92562	10.0939
ASHGA5P011037	0.000512341	0.0216207	2.24652	down	protein_coding	NM_001135637	CCDS44221.1	PIP5K1A	RefSeq	3638	chr1	+	151171020	151222007	TATTTAAGAAGATTCCCTGCGTTCACCTTGGTCGTCCTGATGTTTTACCTCAGACTCCAC	8394	phosphatidylinositol 4-phosphate 5-kinase type-1 alpha isoform 4	5.13068	6.29837
ASHGA5P007966	0.0340295	0.0908408	2.24595	down	protein_coding	NM_001002031	CCDS31812.1	ATP5G2	RefSeq	1178	chr12	-	54058943	54070512	GATGCCTGAGCTGATCCTCTCTCCTGCCACAGCTCCTCACCCCCTGAAAATGTTCGCCTG	517	"ATP synthase lipid-binding protein, mitochondrial isoform a precursor"	8.55328	9.7206
ASHGA5P053018	0.000397081	0.0203269	2.2458	down	protein_coding	NM_001011666	CCDS43563.1	CREB5	RefSeq	7772	chr7	+	28725720	28865511	ACACACACTCATTCCAGAGCTCTCATGTTCTGCACCTCAGGAGGGAATTCAGCCTCAGTG	9586	cyclic AMP-responsive element-binding protein 5 isoform delta	3.51763	4.68486
ASHGA5P055035	0.00280245	0.0318783	2.24188	down	protein_coding	ENST00000434603	CCDS44686.1	MAP6	GENCODE	4329	chr11	-	75313904	75379479	ACTGGCTGAGGCGAAAGAGTAAATTTCCCTGCACTTTCCTTTTACTCTTCTCTCTCTCTC	4135	microtubule-associated protein 6 [Source:HGNC Symbol;Acc:6868]	3.66414	4.82885
ASHGA5P055385	0.0141357	0.0527669	2.24171	down	protein_coding	NM_002631	CCDS113.1	PGD	RefSeq	1937	chr1	+	10459084	10480201	TCTTTCCCTCACTCGTCCTCCGCGCGTCGCCGCTCTTCGGTTCTGCTCTGTCCGCCGCCA	5226	"6-phosphogluconate dehydrogenase, decarboxylating"	6.53091	7.69551
ASHGA5P054479	0.0125359	0.0495937	2.24093	down	protein_coding	NM_018055	CCDS7304.1	NODAL	RefSeq	2086	chr10	-	72191691	72201465	CCAGCCCACCATGCACGCCCACTGCCTGCCCTTCCTTCTGCACGCCTGGTGGGCCCTACT	4838	nodal homolog precursor	9.25294	10.417
ASHGA5P013959	0.0088001	0.041047	2.23904	down	protein_coding	NM_001638	CCDS44923.1	APOF	RefSeq	1720	chr12	-	56754354	56756583	GGACTGTGTGGGTACTCTGCTCCAGACATGCGTGGCCTCAGACTCATCATGATACCAGTT	319	apolipoprotein F precursor	6.14546	7.30835
ASHGA5P019589	0.00508633	0.0338278	2.23872	down	protein_coding	ENST00000576860		AC103702.1	GENCODE	427	chr17	+	46679852	46683772	CAGCCGCCAGCCGTTTCCTCTCCCTCGCCGGCCTCGGCGGAGATTCCAGGCCCTATAGAA			5.90791	7.07059
ASHGA5P003694	0.0144816	0.0534217	2.23861	down	protein_coding	NM_001128931	CCDS47159.1	NAF1	RefSeq	1635	chr4	-	164047859	164088073	CAGATGCATCATGGAAGAATGATCAGGAACCACCACCAGAGGCCTTAGATTTTAGTGATG	92345	H/ACA ribonucleoprotein complex non-core subunit NAF1 isoform b	4.25944	5.42205
ASHGA5P051637	0.00125847	0.0265654	2.23742	down	protein_coding	NM_001178065	CCDS54632.1	CASR	RefSeq	5011	chr3	+	121903180	122005344	ACCTTTGTGCTGTCTGTCCTCCAGGTGCCCTTCTCCAACTGCAGCCGAGACTGCCTGGCA	846	extracellular calcium-sensing receptor isoform 1 precursor	6.22826	7.39009
ASHGA5P001238	0.00336748	0.032685	2.23289	down	protein_coding	NM_013314	CCDS7446.1	BLNK	RefSeq	1829	chr10	-	97951454	98031333	AAGCAGTTCACCTCCACCTGAAAAAGCTCCCATGGTGAATAGATCAACCAAGCCAAATTC	29760	B-cell linker protein isoform 1	4.46678	5.62569
ASHGA5P051801	0.0344324	0.0914988	2.23228	down	protein_coding	NM_018622	CCDS3248.1	PARL	RefSeq	1423	chr3	-	183547172	183602693	TGGGGCAGAGGTTGGGAAGATGGCGTGGCGAGGCTGGGCGCAGAGAGGCTGGGGCTGCGG	55486	"presenilins-associated rhomboid-like protein, mitochondrial isoform 1 preproprotein"	6.63945	7.79797
ASHGA5P046358	0.00436773	0.0334484	2.22772	down	protein_coding	NM_001171876	CCDS55517.1	MCF2	RefSeq	3867	chrX	-	138663929	138790381	TGCTCCTCCGTATAAAGGACATCAGTCATTTCTTAATGCAAGACATCGCCTTCTTGTCTG	4168	proto-oncogene DBL isoform c	3.33384	4.48941
ASHGA5P021834	0.036807	0.095995	2.22728	down	protein_coding	NM_001145964	CCDS54031.1	SLC12A4	RefSeq	4643	chr16	-	67977376	68000781	CTGAGCCCCGGACATGGCAACCACAGAGAGAGCAGCCCTTTTCTTTCCCCCTTGGAGGCT	6560	solute carrier family 12 member 4 isoform e	8.48872	9.644
ASHGA5P009999	0.00294989	0.0319884	2.22674	down	protein_coding	NM_032781	CCDS7845.1	PTPN5	RefSeq	3156	chr11	-	18749474	18813389	ACAGTTCCTGCTTGCCTGTGGGGTGCTCTGGTTCAGCGGTTATGGCCACATCTGGTCACA	84867	tyrosine-protein phosphatase non-receptor type 5 isoform a	4.74461	5.89954
ASHGA5P012840	0.0389267	0.0997007	2.22575	down	protein_coding	NM_001135565	CCDS48076.1	HDHD1	RefSeq	2224	chrX	-	6966960	7066231	TCTCCCCCTCCTGCTATGGAGAAGTGCCTTGTCTTTGAAGATGCTCCCAATGGGGTGGAG	8226	pseudouridine-5'-monophosphatase isoform a	9.37714	10.5314
ASHGA5P032402	0.0012154	0.026401	2.22412	down	protein_coding	NM_001165252	CCDS54123.1	KRTAP2-3	RefSeq	880	chr17	-	39215492	39216344	TGTCCCACTGACTCATCACCCTTTTTTCTACTGTTTCAAGGTTCTCAGATGAGATTTTTT	730755	keratin-associated protein 2-3	4.1897	5.34293
ASHGA5P054700	0.0273858	0.0786992	2.22279	down	protein_coding	NM_031946	CCDS43681.1	AGAP3	RefSeq	3247	chr7	+	150783825	150841523	CCAGCGCCGACCAGTGGAGTGAGGCCACCACTTCCCTGCCCCCAGGCATGCAGCACCCTG	116988	"arf-GAP with GTPase, ANK repeat and PH domain-containing protein 3 isoform a"	7.15198	8.30435
ASHGA5P036360	0.0235948	0.0714508	2.22028	down	protein_coding	ENST00000286201	CCDS2351.1	FZD7	GENCODE	3851	chr2	+	202899309	202903160	GATTTTTGTTTTGTTGGCTTTAAAGGTCTACCCCACTTTATCACATGTACAGATCACAAA	8324	frizzled family receptor 7 [Source:HGNC Symbol;Acc:4045]	5.23178	6.38253
ASHGA5P021828	0.00396159	0.0329783	2.2195	down	protein_coding	ENST00000541722	CCDS54813.1	GLRB	GENCODE	2765	chr4	+	157997276	158093242	AGTGCCCCTGGGTTGGTGAGACCAGATGCAAAAAAGTTTGTACTTCTAAGTCTGATCTGA	2743	"glycine receptor, beta [Source:HGNC Symbol;Acc:4329]"	4.01693	5.16716
ASHGA5P004102	0.00189503	0.0290776	2.21667	down	protein_coding	NM_015429	CCDS46880.1	ABI3BP	RefSeq	4488	chr3	-	100468178	100712334	TGACACACACCAAACCTGCTCCCAAGCAGACACCACGTGCTCCTCCTAAGCCAAAAACAT	25890	target of Nesh-SH3 precursor	4.77099	5.91938
ASHGA5P004786	0.00103965	0.0253141	2.21536	down	protein_coding	ENST00000297268	CCDS34682.1	COL1A2	GENCODE	5411	chr7	+	94023872	94060544	AAAGGTCATGCTGGTCTTGCTGGTGCTCGGGGTGCTCCAGGTCCTGATGGAAACAATGGT	1278	"collagen, type I, alpha 2 [Source:HGNC Symbol;Acc:2198]"	4.01038	5.15792
ASHGA5P030359	0.0207803	0.0661113	2.21418	down	protein_coding	NM_018958	CCDS10015.1	NPAP1	RefSeq	8053	chr15	+	24920540	24928593	TTGTTTACTTGACTGAATCCCTTCCTTTTCCAGAAACCTTGAGCCTCCTCCACTGGTTTG	23742	protein C15orf2	6.81271	7.95948
ASHGA5P012937	0.00256545	0.0315251	2.20886	down	protein_coding	NM_005042	CCDS8636.1	PRH2	RefSeq	4323	chr12	+	11081833	11087444	AGCTCAGCTCAGGACTTAGATGAAGATGTCAGCCAAGAAGACGTTCCCTTGGTAATATCA	5555	salivary acidic proline-rich phosphoprotein 1/2 precursor	4.07522	5.21852
ASHGA5P004512	0.000239082	0.0183123	2.2087	down	protein_coding	ENST00000293851	CCDS42110.1	PRSS33	GENCODE	1694	chr16	-	2833953	2836708	CGCCTGCCAGGGTGATTCTGGGGGACCTCTGACCTGCCTGCAGTCTGGGAGCTGGGTCCT	260429	"protease, serine, 33 [Source:HGNC Symbol;Acc:30405]"	4.86829	6.01149
ASHGA5P007580	0.00841902	0.0401144	2.20743	down	protein_coding	ENST00000334534	CCDS33439.1	C20orf94	GENCODE	1407	chr20	+	10415950	10604027	AAACCCCGCCACCATCATAGGTCTGTAGTTACTGTGGAATCAATAAGCCATGGCATCTAA	128710	chromosome 20 open reading frame 94 [Source:HGNC Symbol;Acc:16225]	7.74182	8.88419
ASHGA5P055716	0.00109373	0.0254961	2.2066	down	protein_coding	NM_001170543	CCDS53845.1	PGAM5	RefSeq	2851	chr12	+	133287392	133299323	ACTGCAGTTTCCTCCTGAAGGCTGGCTCCGGCTCTCCCTCAATAATGGCAGCATCACCCA	192111	"serine/threonine-protein phosphatase PGAM5, mitochondrial isoform 1"	5.993	7.13482
ASHGA5P052722	8.6055e-06	0.0067434	2.20574	down	protein_coding	NM_004053	CCDS34450.1	BYSL	RefSeq	2005	chr6	+	41888964	41900784	CAGTCCCCACGTGCGATCCTTCCCGGCAACTTTTTCGAGAAAAATGCCCAAATTCAAGGC	705	bystin	5.38333	6.52459
ASHGA5P041663	8.52828e-05	0.0145843	2.2047	down	protein_coding	NM_001032280	CCDS34337.1	TFAP2A	RefSeq	3808	chr6	-	10396915	10412607	TTTTTCCACCCTGACTCGTTACCCCAGACTCTTCGCAGATGTTAGTTCACAGTTTTTCAG	7020	transcription factor AP-2-alpha isoform b	7.23918	8.37976
ASHGA5P009903	0.00493264	0.0338278	2.20375	down	protein_coding	NM_058186	CCDS13671.1	FAM3B	RefSeq	1384	chr21	+	42688660	42729654	TTGGCTGGTGGCCTGCTCAAGGTGGTGTTCGTGGTCTTCGCCTCCTTGTGTGCCTGGTAT	54097	protein FAM3B isoform a precursor	4.73288	5.87284
ASHGA5P021668	0.00847794	0.040151	2.20084	down	protein_coding	ENST00000537716	CCDS54210.1	CD320	GENCODE	1125	chr19	-	8367010	8373240	TTTCCACCCCGACCTCTGCCCAGGCCGCAGGGATTGAGCCATGTACCCAGAAAGGGCAAT	51293	CD320 molecule [Source:HGNC Symbol;Acc:16692]	8.91361	10.0517
ASHGA5P010190	0.00050699	0.0216207	2.19995	down	protein_coding	NM_021806	CCDS35453.1	FAM3A	RefSeq	2982	chrX	-	153733326	153744566	GCAGTGGCTTTCCTCGCATCCAGCAACTCTTCACCAGTCCAGAGAGCTCGGTGACTGCAG	60343	protein FAM3A isoform 1 precursor	3.82255	4.96002
ASHGA5P030701	0.00239919	0.0311898	2.1988	down	protein_coding	NM_003874	CCDS1206.1	CD84	RefSeq	8245	chr1	-	160510883	160549306	TATATCATGGCTTCAAGGAACACCCAGCCAGCAGAGTCCAGAATCTATGATGAAATCCTG	8832	SLAM family member 5 isoform 2 precursor	3.85705	4.99377
ASHGA5P010109	0.000895922	0.0245343	2.19865	down	protein_coding	ENST00000359320	CCDS9598.1	CMTM5	GENCODE	1200	chr14	+	23846016	23848981	TAACTGGCCCTGTCTGGACTTCCTGCGCTGTGTCAGTGCCATCATCATCTTCCTGGTGGT	116173	CKLF-like MARVEL transmembrane domain containing 5 [Source:HGNC Symbol;Acc:19176]	4.65974	5.79636
ASHGA5P055010	0.0490075	0.11592	2.19825	down	protein_coding	ENST00000398531	CCDS41684.1	KRTAP5-10	GENCODE	1058	chr11	+	71276608	71277666	GGCTCCAAAGGTGGCTGTGGTTCCTGTGGGGGCTCCAAGGGGGGCTGTGGTTCTTGTGGC	387273	keratin associated protein 5-10 [Source:HGNC Symbol;Acc:23605]	6.4489	7.58526
ASHGA5P012713	0.0412925	0.103377	2.19764	down	protein_coding	NM_002915	CCDS9352.1	RFC3	RefSeq	2396	chr13	+	34392205	34411644	AATAATGAAGGGCCTTCTCTCAGAACTGTTACATAATTGTGATGGACAACTGAAAGGGGA	5983	replication factor C subunit 3 isoform 1	3.80572	4.94167
ASHGA5P050749	0.000730002	0.023569	2.19734	down	protein_coding	NM_144629	CCDS2323.1	RFTN2	RefSeq	3131	chr2	-	198435526	198540584	ATTCCTTACAGATTTTGCCATGGGGTGCGGACTTAGAAAGCTAGAAGACCCTGATGATAG	130132	raftlin-2	3.99457	5.13032
ASHGA5P032727	0.00854279	0.0402709	2.19682	down	protein_coding	NM_022831	CCDS1533.1	AIDA	RefSeq	3020	chr1	-	222841354	222885864	AGTTTGGCTGTGGCGGCAAATGGGCTTGGGCGGCTCCTCGGCGGGTGGCGGTGGTGGCCG	64853	"axin interactor, dorsalization-associated protein"	5.20364	6.33906
ASHGA5P004875	0.00216934	0.0306998	2.19434	down	protein_coding	NM_153022	CCDS8619.1	C12orf59	RefSeq	2800	chr12	+	10331556	10344403	GCCCTGCTGTATTTCATCCTGTTGCCTGACCACAGACTGGGTACATCTCTGGTATATATG	120939	uncharacterized protein C12orf59	4.5471	5.68089
ASHGA5P028423	0.00208982	0.0303694	2.19404	down	protein_coding	NM_022459	CCDS41872.1	XPO4	RefSeq	9902	chr13	-	21351467	21476913	TTTGTTAACTGCCTCACACACCTCACTTGTTCTTTTGGGCGAAGTGCTGCATTGGAAGAA	64328	exportin-4	4.09723	5.23082
ASHGA5P050396	0.00377431	0.0329783	2.19097	down	protein_coding	NM_001099218	CCDS42656.1	RAD51AP2	RefSeq	3589	chr2	-	17691985	17699706	TGTCTCTCCCTCAGCCCACGCCGCGGATGGCCGAGCTCAGAAAGCCTACCTCCTCTTTAA	729475	RAD51-associated protein 2	6.01175	7.14332
ASHGA5P012669	0.00876555	0.0409608	2.18997	down	protein_coding	NM_001007525	CCDS32945.1	NWD1	RefSeq	7645	chr19	+	16830786	16928774	GAGCTACACGGCACCCTGCTGACAGTCCAGTTTGTCCATGCTGTGGTAAACAGAATCATC	284434	NACHT and WD repeat domain-containing protein 1	7.20146	8.33237
ASHGA5P005510	0.00761609	0.0383326	2.18904	down	protein_coding	NM_014011	CCDS1830.1	SOCS5	RefSeq	4422	chr2	+	46926098	46989927	AAGCCCTGCCTGCTATTGGTCACGATTTTATAATCAATGGATAAAGTGGGAAAAATGTGG	9655	suppressor of cytokine signaling 5	5.52406	6.65436
ASHGA5P012323	0.012686	0.049858	2.18662	down	protein_coding	ENST00000377203	CCDS54132.1	CD300LG	GENCODE	1297	chr17	+	41924515	41935602	ATGAGTCTTTACTGATCTCTCTGTTCGTCTTTCCAGCTTCTCCTGGGCTCTACCCGGCAG	146894	CD300 molecule-like family member g [Source:HGNC Symbol;Acc:30455]	4.69143	5.82013
ASHGA5P044769	4.3481e-05	0.0121181	2.186	down	protein_coding	NM_025069	CCDS6094.1	ZNF703	RefSeq	2174	chr8	+	37553300	37556396	GGCGCTGCCTCCTCCAAATGAGCGATTCGCCCGCTGGATCTAACCCAAGGACACCCGAAA	80139	zinc finger protein 703	5.34508	6.47338
ASHGA5P049402	0.00831754	0.0398893	2.18504	down	protein_coding	NM_016080	CCDS32520.1	GLOD4	RefSeq	1863	chr17	-	662548	685571	CGTGGACTGGGCTGTACGGTGCGCGTGACGGCTGCGTGCGGCGGGAATCATGGCTGCTCG	51031	glyoxalase domain-containing protein 4	3.92598	5.05363
ASHGA5P005230	0.0010921	0.0254961	2.18493	down	protein_coding	NM_001740	CCDS10899.1	CALB2	RefSeq	1485	chr16	+	71392615	71424342	GGCCTCTCAGAGATGTCCCGACTCCTGCCTGTCCAGGAAAACTTCCTGCTTAAATTTCAG	794	calretinin isoform 1	5.00419	6.13178
ASHGA5P011338	0.0370533	0.096365	2.18354	down	protein_coding	NM_147175	CCDS48169.1	HS6ST2	RefSeq	4456	chrX	-	131760037	132095423	GACCGTCCAGGAACTTCCACTACATCACCATCCTCCGAGACCCAGTGTCCCGGTACTTGA	90161	heparan-sulfate 6-O-sulfotransferase 2 isoform S	5.2841	6.41077
ASHGA5P032573	0.00105243	0.0253141	2.18183	down	protein_coding	NM_001038704	CCDS32691.1	C17orf47	RefSeq	2127	chr17	-	56618947	56621733	AAATAGACTCTAGCCCTTTCTGTGAGGATCTGAAGTTCCAGAGAGAGAAGGCAAGCCTAT	284083	uncharacterized protein C17orf47	3.35078	4.47632
ASHGA5P055094	0.0462028	0.111674	2.18172	down	protein_coding	NM_001190462		LOC643037	RefSeq	604	chr11	+	94245694	94265289	CCCAAGGCGGGTCGCGAAGAGGAGCAGCCTCCTCCGCCAGCAGGGCTGGGGTGCGGGGCG	643037	uncharacterized protein LOC643037	5.18115	6.30661
ASHGA5P039905	0.0287013	0.0812569	2.1817	down	protein_coding	ENST00000313860	CCDS33977.1	LIMCH1	GENCODE	6165	chr4	+	41362803	41702061	CTTCCAGGCTGGGCCTTTCTCTCCCTGTTCTCCCACCCCTCCCGGTCAGTCACCAAACAG	22998	LIM and calponin homology domains 1 [Source:HGNC Symbol;Acc:29191]	10.5619	11.6874
ASHGA5P006215	0.0173034	0.0590043	2.18157	down	protein_coding	NM_005944	CCDS2965.1	CD200	RefSeq	2226	chr3	+	112051915	112081658	GGAGAGGCTGGTGATCAGGATGCCCTTCTCTCATCTGTCTACCTACAGCCTGGTTTGGGT	4345	OX-2 membrane glycoprotein isoform a precursor	4.17451	5.29988
ASHGA5P014940	0.000479615	0.0212428	2.18152	down	protein_coding	NM_001145114	CCDS44467.1	RRP12	RefSeq	4266	chr10	-	99116457	99161127	TACTTCGCTGCTCTGGTCCTTTCCTGCCTGGCCACCCTTCTGCGGAAGCAAGACCTGGAG	23223	RRP12-like protein isoform 2	7.43633	8.56167
ASHGA5P009123	0.0222569	0.0690202	2.17945	down	protein_coding	NM_001096	CCDS11412.1	ACLY	RefSeq	4450	chr17	-	40023178	40075272	CAAAGAAGGCCAAGCCTGCCATGCCACAAGATTCAGTCCCAAGTCCAAGATCCCTGCAAG	47	ATP-citrate synthase isoform 1	4.98702	6.11098
ASHGA5P005785	0.00472182	0.0338278	2.17517	down	protein_coding	NM_002197	CCDS6525.1	ACO1	RefSeq	3561	chr9	+	32384600	32450832	CTAACAGAGGCCTAACTCCACGAGAATTCAACTCCTATGGCTCCCGCCGAGGTAATGACG	48	cytoplasmic aconitate hydratase	7.46944	8.59057
ASHGA5P014699	0.0198342	0.0640617	2.17432	down	protein_coding	NM_006700	CCDS9160.1	TRAFD1	RefSeq	2665	chr12	+	112563348	112591408	TTTCTCCTCTCGTCCCTGGAAGAGCTAAAGATGGCTGAATTTCTAGATGACCAGGAAACT	10906	TRAF-type zinc finger domain-containing protein 1	4.0518	5.17236
ASHGA5P005488	0.00174275	0.0289426	2.17058	down	protein_coding	NM_001013649	CCDS42704.1	C2orf68	RefSeq	4283	chr2	-	85832375	85839179	CGACACCGAGATGTCTCTGCCCACCCACGCAACCCAGACTATGAAGAGTCCGGTGAAAGC	388969	UPF0561 protein C2orf68	6.18328	7.30136
ASHGA5P002765	0.0130035	0.0505598	2.16978	down	protein_coding	NM_016111	CCDS32363.1	TELO2	RefSeq	3338	chr16	+	1543351	1560460	GAAATTCCAGTACGAAGAGGATGAACTGAGCCTCGAGCTGCTGGCCTTGGCCTCCCCCCA	9894	telomere length regulation protein TEL2 homolog	6.68264	7.80019
ASHGA5P052657	0.0482552	0.114666	2.16962	down	protein_coding	NM_032955	CCDS34398.1	AIF1	RefSeq	503	chr6	+	31583788	31584798	ATCCCTTCTGCTCTCTCCCCTCACCCAGAGAAATACATGGAGTTTGACCTTAATGGAAAT	199	allograft inflammatory factor 1 isoform 1	9.98759	11.105
ASHGA5P029609	3.09679e-05	0.0114441	2.16902	down	protein_coding	ENST00000368750	CCDS30866.1	SPRR2E	GENCODE	678	chr1	-	153065610	153067001	AACACCTGTGCAATTGTCACTTTTCTTTCACTCCCTGAATAAAATATCTTTGCATACGTA	6704	small proline-rich protein 2E [Source:HGNC Symbol;Acc:11265]	2.91402	4.03106
ASHGA5P005021	3.14428e-05	0.0114441	2.1678	down	protein_coding	NM_001144757	CCDS45207.1	SCG5	RefSeq	1244	chr15	+	32933869	32989298	CTGCCCCTCGGTTGACAATGGTCTCCAGGATGGTCTCTACCATGCTATCTGGCCTACTGT	6447	neuroendocrine protein 7B2 isoform 1 precursor	5.36656	6.48279
ASHGA5P035994	0.00435809	0.0334484	2.16592	down	protein_coding	NM_032283	CCDS30650.1	ZDHHC18	RefSeq	3165	chr1	+	27153200	27182211	CGTCTTCGCGCTCACGCTGCTGCTCATCCTCACCACCACCGGCCTCTTCTTCGTCTTTGA	84243	palmitoyltransferase ZDHHC18	6.43697	7.55194
ASHGA5P038715	0.00839174	0.0400593	2.16494	down	protein_coding	NM_003884	CCDS2634.1	KAT2B	RefSeq	4824	chr3	+	20081523	20195896	ATTTCACGTGGTTGGCAATTCCCTCAACCAGAAACCAAACAAGAAGATCCTGATGTGGCT	8850	histone acetyltransferase KAT2B	3.24419	4.35852
ASHGA5P055384	0.0108528	0.0460083	2.16399	down	protein_coding	NM_018113	CCDS8780.2	LMBR1L	RefSeq	2358	chr12	-	49490922	49504680	CCAGGTCTCCTTCTCCAAGCTGGGCTCCTTTGGTGCCGTCATTCAGGTTGTACTCATCTT	55716	protein LMBR1L	5.51002	6.62371
ASHGA5P037001	0.00301002	0.0321046	2.16318	down	protein_coding	NM_054112	CCDS13177.1	DEFB118	RefSeq	1158	chr20	+	29956420	29961705	GGACCATGAAACTCCTGCTGCTGGCTCTTCCTATGCTTGTGCTCCTACCCCAAGTGATCC	117285	beta-defensin 118 precursor	6.48586	7.59901
ASHGA5P055448	0.0089133	0.0412539	2.16027	down	protein_coding	NM_012168	CCDS130.1	FBXO2	RefSeq	1724	chr1	-	11708417	11714888	AGCGCTCCGGCTCCTCCTCTCGCGACCGCCCTCCGCAGCGATGGACGGAGACGGTGACCC	26232	F-box only protein 2	6.03155	7.14276
ASHGA5P012923	1.02665e-06	0.00261462	2.15785	down	protein_coding	NM_001008564	CCDS31949.1	NUPL1	RefSeq	4299	chr13	+	25875665	25916561	AACAAATACAGGAACGCCAGCCACTACATCTGCAGCTACAACAGGCTTCAGTTTAGGATT	9818	nucleoporin p58/p45 isoform b	3.14484	4.25443
ASHGA5P053688	0.00195088	0.0296621	2.15696	down	protein_coding	ENST00000377621	CCDS47970.1	FAM75A5	GENCODE	4226	chr9	+	41500678	41506925	TTTCCCGCCACCCACCAGAGACCTGTCAGATGGAAGCTGGTAGCCTGTTTTTGCTCAGCT	727905	"family with sequence similarity 75, member A5 [Source:HGNC Symbol;Acc:32005]"	5.91913	7.02814
ASHGA5P026964	0.0391739	0.0999799	2.15666	down	protein_coding	ENST00000339235	CCDS8509.1	FBXL14	GENCODE	2111	chr12	-	1675158	1703331	TCAAGTCTCTCTCCCTCTGCTCCTGCCACATCAGTGATGATGGCATCAACCGCATGGTGC	144699	F-box and leucine-rich repeat protein 14 [Source:HGNC Symbol;Acc:28624]	9.43702	10.5458
ASHGA5P032358	0.0133609	0.0513639	2.15577	down	protein_coding	NM_001001418	CCDS11309.2	TBC1D3C	RefSeq	2140	chr17	-	34581084	34592032	ACCTATCTGCTCTCTGGCCTGCCTCAGTGGTCTACAGCAGTTACACACAGGCAGTGGTAT	414060	TBC1 domain family member 3C-like protein ENSP00000341742	4.84854	5.95675
ASHGA5P006245	0.00112041	0.0256854	2.15555	down	protein_coding	NM_001024939	CCDS33616.1	SLC2A11	RefSeq	2348	chr22	+	24200040	24227725	TTCGAATGCTCCACGCCCTCCTGCGATCTAGAATGATTCAGGGCAGGATCCTGCTCCTGA	66035	"solute carrier family 2, facilitated glucose transporter member 11 isoform b"	6.52874	7.6368
ASHGA5P007829	0.000128895	0.0145843	2.1514	down	protein_coding	NM_001083536	CCDS43849.1	FGD3	RefSeq	3470	chr9	+	95709600	95798518	CCTGGCCCAGCACTCTGGCCCCCAGAAGCTTCTCCACATTGCCCAGGAGCTCCTGCACAC	89846	"FYVE, RhoGEF and PH domain-containing protein 3"	9.52032	10.6256
ASHGA5P013436	0.00261314	0.0316606	2.15009	down	protein_coding	NM_001040664	CCDS42498.1	PPAN-P2RY11	RefSeq	3208	chr19	+	10216898	10226064	ATGGATCGAGGTGCCAAGTCCTGCCCTGCCAACTTCTTGGCAGCTGCCGACGACAAACTC	692312	PPAN-P2RY11 protein isoform 1	4.86853	5.97293
ASHGA5P005352	0.000963685	0.0249914	2.14987	down	protein_coding	NM_024847	CCDS10573.1	TMC7	RefSeq	4426	chr16	+	18995255	19075262	GGTCCATCCAGAGAACCTCTCTCTAGACTCCAGTTGCTTCTCTTCTCCACCTGTGAACTT	79905	transmembrane channel-like protein 7 isoform a	5.13728	6.24153
ASHGA5P027527	1.25422e-05	0.00714349	2.14986	down	protein_coding	NM_024312	CCDS9088.1	GNPTAB	RefSeq	5644	chr12	-	102139274	102224645	AGTCCCTGCTCACATGCCTCACATGATTGACCGGATTGTTATGCAAGAACTGCAAGATAT	79158	N-acetylglucosamine-1-phosphotransferase subunits alpha/beta precursor	5.01665	6.1209
ASHGA5P000892	0.00039548	0.0203269	2.14601	down	protein_coding	NM_130760	CCDS12028.1	MADCAM1	RefSeq	1546	chr19	+	496489	505343	GCCATCCCCGTCCTGCACAGCCCGACCTCCCCGGAGCCTCCCGACACCACCTCCCCGGAG	8174	mucosal addressin cell adhesion molecule 1 isoform a precursor	9.68998	10.7916
ASHGA5P052911	0.0157205	0.0559166	2.14528	down	protein_coding	NM_144980	CCDS5288.1	C6orf118	RefSeq	1852	chr6	-	165693152	165723111	ACAGCCCAGCCCAGGCAGCTGGAGGGAAGGAAGCGATGGCGGAGGAGCGGGAGCCTGAAT	168090	uncharacterized protein C6orf118	4.00769	5.10886
ASHGA5P043535	0.00387188	0.0329783	2.14505	down	protein_coding	NM_178423	CCDS47554.1	HDAC9	RefSeq	4659	chr7	+	18535368	19036992	TTTCTGCCCTGGCCTCCCTAACAGTGGATGTGGAACAGCCCTTTGCTCAGGAAGACAGCA	9734	histone deacetylase 9 isoform 4	8.09226	9.19328
ASHGA5P001882	0.00119447	0.0262588	2.14477	down	protein_coding	NM_021235	CCDS32944.1	EPS15L1	RefSeq	2854	chr19	-	16472388	16582823	AAGAAACCTGCTCCTCCACGGCCTAAACCGCCCAGCGGTAAAAGTACACCTGTAAGCCAG	58513	epidermal growth factor receptor substrate 15-like 1 isoform 2	5.19532	6.29615
ASHGA5P055929	0.0184693	0.0613455	2.14463	down	protein_coding	NM_006177	CCDS9608.1	NRL	RefSeq	1974	chr14	-	24549315	24553832	CGAGGGCACCCGGCCAGGCCTGGAGGAGCTGTACTGGCTGGCTACCCTGCAGCAGCAGCT	4901	neural retina-specific leucine zipper protein	7.33038	8.43111
ASHGA5P018508	0.00325338	0.0326774	2.1445	down	protein_coding	NM_007370	CCDS9185.1	RFC5	RefSeq	2122	chr12	+	118454505	118470042	ACCTGCCCTGGGTTGAAAAATACCGGCCACAGACCCTGAATGATCTCATTTCTCATCAGG	5985	replication factor C subunit 5 isoform 1	4.28836	5.389
ASHGA5P002746	0.00394776	0.0329783	2.14151	down	protein_coding	NM_024761	CCDS6520.1	MOB3B	RefSeq	6528	chr9	-	27325206	27529850	ATTTCCAACATGCGTGGGTGTTCCCTTCCCAAAGAACTTCCTTCAGATCTGCAAGAAGAT	79817	MOB kinase activator 3B	4.24712	5.34575
ASHGA5P014789	0.0109986	0.0461987	2.14145	down	protein_coding	NM_001145713	CCDS54285.1	SAE1	RefSeq	2323	chr19	+	47634079	47713893	CTCCTTCAAGGCCCTGTCTCAGCGGGACCCTCCTCACAACAACTTCTTCTTCTTCGATGG	10055	SUMO-activating enzyme subunit 1 isoform b	6.01405	7.11264
ASHGA5P009403	0.00187727	0.0290776	2.1412	down	protein_coding	NM_181050	CCDS10406.1	AXIN1	RefSeq	3567	chr16	-	337439	402676	GAAAAGAGAGCCAGCCGAGCACCCTCCAAGCAGAGGACAAGATCGCAGAGGAAGGTGGGC	8312	axin-1 isoform b	6.71263	7.81105
ASHGA5P006742	5.6664e-06	0.00560452	2.14105	down	protein_coding	ENST00000323084	CCDS13712.1	TSPEAR	GENCODE	3967	chr21	-	45917774	46131495	CCCTGCACAGACCTGCGCCCCCTGGACATCCTGGCGGAAGTGGTCCCTTCTGATGGCGCC	54084	thrombospondin-type laminin G domain and EAR repeats [Source:HGNC Symbol;Acc:1268]	6.79896	7.89728
ASHGA5P017753	0.00148536	0.027612	2.14004	down	protein_coding	NM_001032409	CCDS31905.1	OAS1	RefSeq	1575	chr12	+	113344738	113357712	GATTCTGCTGACCCAGCACACTCCAGGCAGCATCCACCCCACAGGCAGAAGAGGACTGGA	4938	2'-5'-oligoadenylate synthase 1 isoform 3	7.68671	8.78435
ASHGA5P052335	0.00488933	0.0338278	2.13978	down	protein_coding	NM_032290	CCDS4071.2	ANKRD32	RefSeq	3813	chr5	+	93954390	94031573	CCTGCATCCTCCTTGGAAGTCTCCAGCCATGTCGAGATATTATTTAGAGTTGTTTCAGTG	84250	ankyrin repeat domain-containing protein 32	4.67572	5.77318
ASHGA5P004670	0.000643632	0.0232406	2.13715	down	protein_coding	NM_153480	CCDS2589.1	IL17RE	RefSeq	2717	chr3	+	9944511	9958084	CTGTGTCCTGGTGTGGCGGTCAGATGTCCAGTTTGCCTGGAAGCACCTCTTGTGTCCGGA	132014	interleukin-17 receptor E isoform 1 precursor	4.32109	5.41678
ASHGA5P050616	0.000243293	0.0183587	2.13541	down	protein_coding	NM_004336	CCDS33273.1	BUB1	RefSeq	3509	chr2	-	111395408	111435684	TTTGGAACAGGATGATGAAGATGATTTATCTGCTGGCTTGGCACTGATTGACCTGGGTCA	699	mitotic checkpoint serine/threonine-protein kinase BUB1	5.35963	6.45414
ASHGA5P004456	0.000105503	0.0145843	2.13077	down	protein_coding	NM_014665	CCDS6432.1	LRRC14	RefSeq	5369	chr8	+	145743362	145750559	AGCTGCTCAGCACCCTGCAGAGCCCCCTGGAGAGCCTGGAGTTGGCCTTCTGTGCTCTGC	9684	leucine-rich repeat-containing protein 14	8.46346	9.55484
ASHGA5P019461	0.00227898	0.0309205	2.12564	down	protein_coding	NM_005595	CCDS615.1	NFIA	RefSeq	9403	chr1	+	61547979	61928460	ACGTCACCAATCCTGGTACCTGGGATAAAAGTTGCAGCGTCCCACCATCCACCAGACAGA	4774	nuclear factor 1 A-type isoform 2	5.3745	6.4624
ASHGA5P003145	0.00567151	0.0345083	2.12422	down	protein_coding	NM_018140	CCDS34126.1	CEP72	RefSeq	2427	chr5	+	612404	653666	TTTGAAAGAGGGCAGACCACACCACCCCAGAGCCAAGTGCACCGAGGCCTTGGCCAAGCA	55722	centrosomal protein of 72 kDa	6.47653	7.56346
ASHGA5P004283	0.00942255	0.0425098	2.124	down	protein_coding	NM_000136	CCDS35071.1	FANCC	RefSeq	4612	chr9	-	97861335	98079991	CATCACCCTGATGGCTCACACTGCTGAGATAACTCACGAGATCATTGGCTTTCTTGACCA	2176	Fanconi anemia group C protein isoform a	3.49727	4.58405
ASHGA5P030637	0.0133565	0.0513639	2.12338	down	protein_coding	NM_018652	CCDS10245.2	GOLGA6B	RefSeq	3178	chr15	+	72947037	72959738	CCCCACCCCATGATGTTAGAAGAATCTCGACAGAATAAATTGGCAGCAGCCAAGAAAAAG	55889	putative golgin subfamily A member 6B	7.88292	8.96928
ASHGA5P005935	0.0494386	0.116581	2.1233	down	protein_coding	NM_001171818	CCDS4803.1	PPARD	RefSeq	3845	chr6	+	35310334	35395968	ATGGGGGACCACAGCATGCACTTCCTTCCAGCAGCTACACAGACCTCTCCCGGAGCTCCT	5467	peroxisome proliferator-activated receptor delta isoform 1	4.90264	5.98895
ASHGA5P000715	0.00500044	0.0338278	2.12258	down	protein_coding	ENST00000156476	CCDS12822.1	KLK13	GENCODE	1258	chr19	-	51559462	51568367	AGCCCCCAGGTGAATTACCCCAAAACTCTACAATGTGCCAACATCCAACTTCGCTCAGAT	26085	kallikrein-related peptidase 13 [Source:HGNC Symbol;Acc:6361]	4.95807	6.04389
ASHGA5P053346	0.000876861	0.0244068	2.12151	down	protein_coding	ENST00000310447	CCDS5879.1	CASP2	GENCODE	4225	chr7	+	142985307	143004789	AATAAAGATGGTCCTGTCTGCCTTCAGGTGAAGCCTTGCACTCCTGAATTTTATCAAACA	835	"caspase 2, apoptosis-related cysteine peptidase [Source:HGNC Symbol;Acc:1503]"	6.32706	7.41215
ASHGA5P009245	0.000609604	0.0230282	2.12047	down	protein_coding	NM_001025595	CCDS34080.1	ARFIP1	RefSeq	3091	chr4	+	153701111	153833063	GCATTTCAAGGTTCCCCAGCACCGCCACTGCCATCTGTTATGTCTCCTAGCAGGGTTGCA	27236	arfaptin-1 isoform 1	6.25029	7.33468
ASHGA5P008045	0.0155315	0.0554603	2.12023	down	protein_coding	NM_001135179	CCDS46811.1	ZDHHC3	RefSeq	12630	chr3	-	44956752	45017674	GATTGGACAAAGTGCAGCTCCTTCTCTCCACCCACCACAGTGATTCTCCTTATCCTGCTG	51304	palmitoyltransferase ZDHHC3 isoform 1	6.50077	7.58499
ASHGA5P049534	2.12639e-05	0.00985816	2.11979	down	protein_coding	NM_178836	CCDS11182.1	PLD6	RefSeq	2591	chr17	-	17104308	17109646	CTGCGGCGGCGTGGCTGTGGGTCCCGGATTAGCGGCGGCATGGGACGGTTGAGTTGGCAG	201164	mitochondrial cardiolipin hydrolase	3.67321	4.75713
ASHGA5P006068	0.00438356	0.0334484	2.11947	down	protein_coding	NM_006725	CCDS7999.1	CD6	RefSeq	3309	chr11	+	60739112	60787848	GAGCAATAGCTATCAACCGGTCCCCATCACCATCCCCAAAGAAGTTTTCATGCTGCCCAT	923	T-cell differentiation antigen CD6 isoform 1 precursor	6.35961	7.44331
ASHGA5P012376	0.0111753	0.0466952	2.11946	down	protein_coding	NM_001135113	CCDS46121.1	IGFL2	RefSeq	618	chr19	+	46651499	46664561	AGAATCTTCGCTCCTGCTTATGTGTCAGTCTGTCTCCTCCTCTTGTGTCCAAGGGAAGTC	147920	insulin growth factor-like family member 2 isoform b precursor	6.01511	7.0988
ASHGA5P018247	0.000130642	0.0145843	2.11044	down	protein_coding	NM_001042705	CCDS46946.1	IQCJ	RefSeq	1565	chr3	+	158787040	158984096	CAGCACACCCTTTGCCAGGGCCCCTGTTGGGAAGATTCATCCTTACATCTCTTGGAGGTT	654502	IQ domain-containing protein J isoform CaMBPv1	4.64443	5.72197
ASHGA5P027419	0.0159788	0.0563923	2.10983	down	protein_coding	NM_201550	CCDS31856.1	LRRC10	RefSeq	2649	chr12	-	70002344	70004942	ATAGGAAGTCTCTGCCTCTTTCGCCTAGTATCTCTGCCTTTGTTTCAATTTGTTTTGATT	376132	leucine-rich repeat-containing protein 10	5.18648	6.2636
ASHGA5P006996	0.000779	0.023569	2.10957	down	protein_coding	NM_001080395	CCDS45807.1	AATK	RefSeq	5327	chr17	-	79091095	79139872	ATGCTGGCCTGCCTGTGCTGTAAGAAGGGCGGTATCGGGTTCAAGGAGTTTGAGAATGCG	9625	serine/threonine-protein kinase LMTK1 isoform 1	3.89333	4.97028
ASHGA5P005801	0.00370222	0.0329783	2.10908	down	protein_coding	NM_003071	CCDS33875.1	HLTF	RefSeq	5351	chr3	-	148747903	148804341	TTGGGTCCTGCACCAAAAACTTTAGGATTCAATTTGGAAAGTGGTTGGGGCTCTGGAAGA	6596	helicase-like transcription factor	3.96972	5.04633
ASHGA5P003555	0.00214403	0.0306219	2.10797	down	protein_coding	NM_006847	CCDS12902.1	LILRB4	RefSeq	2097	chr19	+	55174123	55179846	CCTTCACGGCTCTGCTCTGCCTCGGGCTGAGTCTGGGCCCCAGGACCCACATGCAGGCAG	11006	leukocyte immunoglobulin-like receptor subfamily B member 4 isoform 1 precursor	5.62708	6.70293
ASHGA5P003987	0.000875663	0.0244068	2.10682	down	protein_coding	ENST00000282007	CCDS9400.1	ZC3H13	GENCODE	6409	chr13	-	46536313	46626894	TTTGAGGCGGTCCTCCTAGCGGCCTGTAGTACAAAATGTCAAAAATTAGAAGGAAGGTCA	23091	zinc finger CCCH-type containing 13 [Source:HGNC Symbol;Acc:20368]	3.13772	4.21278
ASHGA5P009571	0.000653554	0.0233011	2.10655	down	protein_coding	NM_174943	CCDS9868.1	C14orf178	RefSeq	646	chr14	+	78227172	78236085	GTACTCCCAGACCCTTCCGTATCGAGGACCCCAATCAACAACCCACCTGGCATGATCAAC	283579	uncharacterized protein C14orf178 isoform 1	6.29	7.36488
ASHGA5P006446	0.000100911	0.0145843	2.10637	down	protein_coding	NM_001178110	CCDS55531.1	ZNF185	RefSeq	4167	chrX	+	152082985	152142025	TCTGGCAAGATCCACTCCTGGCTCAAACAGGTCTTCCCCAGGCAACAAAGACAAGGAGGC	7739	zinc finger protein 185 isoform 6	6.04638	7.12114
ASHGA5P046127	0.0498024	0.117222	2.10617	down	protein_coding	NM_001184960	CCDS55383.1	SH3KBP1	RefSeq	3864	chrX	-	19552082	19689119	GGGAGTTCTGGGACCTTTTCAAACTGAAGAGAGGAGGCTGGCTGCATCATGGGAGAAGAG	30011	SH3 domain-containing kinase-binding protein 1 isoform c	3.28868	4.3633
ASHGA5P049561	0.00530391	0.0340831	2.10606	down	protein_coding	NM_001033555	CCDS42281.1	SPECC1	RefSeq	3879	chr17	+	20059306	20218072	CTGCTCCACACCTACCTGCCTGCCCACATCCCCTACCAGGAGCTGAATAGTCAGGAGAAA	92521	cytospin-B isoform 2	8.2142	9.28874
ASHGA5P055526	0.00890569	0.0412539	2.10369	down	protein_coding	NM_001007257	CCDS30603.1	PRDM2	RefSeq	6206	chr1	+	14075875	14114574	GCCCCTGATGTCTGCCGCCTCACCCGGGCCTCCAACACTTTCTTCTTCCTCCTCTTCATC	7799	PR domain zinc finger protein 2 isoform c	7.80116	8.87408
ASHGA5P046396	0.000828316	0.0241248	2.10239	down	protein_coding	NM_001586	CCDS14744.1	TEX28	RefSeq	1558	chrX	-	153498929	153523454	AATGCCCCATGTCCGGTGGTGCCAGCACTAGCCCCCATGTCGGTCTCAGAGAACCTTCTC	1527	testis-specific protein TEX28	6.66764	7.73967
ASHGA5P006811	0.00407667	0.0330909	2.1022	down	protein_coding	NM_207296	CCDS3167.1	MBNL1	RefSeq	5246	chr3	+	152017193	152183569	TGCAACAGCCACAGCCAACCAGCCCCATCCTTGATGCTTCTACACTGTTGGGTGCAACAT	4154	muscleblind-like protein 1 isoform f	5.96315	7.03505
ASHGA5P011395	0.00372927	0.0329783	2.10121	down	protein_coding	NM_001134673	CCDS44156.1	NFIA	RefSeq	9495	chr1	+	61547979	61928460	ATGTATTCTCCGCTCTGTCTCACCCAGGATGAATTTCATCCTTTCATCGAAGCACTTCTG	4774	nuclear factor 1 A-type isoform 1	5.0066	6.07782
ASHGA5P052606	4.92018e-05	0.0121181	2.10036	down	protein_coding	NM_033482		POM121L2	RefSeq	3170	chr6	-	27276841	27280011	AACTCACTGCCCGCGCCTCATCTCTCCTCATGGGCAGTTTCCTGAGCAAACTGGAACTTT	94026	POM121-like protein 2	5.4697	6.54033
ASHGA5P043232	0.0016945	0.0287218	2.09969	down	protein_coding	ENST00000300181	CCDS5695.1	TSC22D4	GENCODE	2383	chr7	-	100064141	100076902	AAGAAGAGTAGTTTCCAAATCACCAGCGTCACCACGGACTATGAGGGCCCTGGGAGCCCA	81628	"TSC22 domain family, member 4 [Source:HGNC Symbol;Acc:21696]"	3.5071	4.57728
ASHGA5P009500	0.00240468	0.0311898	2.09881	down	protein_coding	NM_178039	CCDS53732.1	ERC1	RefSeq	9229	chr12	+	1100403	1605099	CCCAGACCAGATCATCCAGCCCCTCTTAGAACTTGACCAAAATAGAAGTAAATTAAAGTT	23085	ELKS/Rab6-interacting/CAST family member 1 isoform delta	6.10381	7.17339
ASHGA5P012606	0.00102651	0.0253141	2.09876	down	protein_coding	NM_001160184	CCDS53256.1	PLEKHN1	RefSeq	2299	chr1	+	901876	910484	GCACACACCGCTGCACAGGCTGAGCCTGGAGAGCAGCCCAGATGCCCCTGACCACACTTC	84069	pleckstrin homology domain-containing family N member 1 isoform b	4.68648	5.75601
ASHGA5P013076	0.0233891	0.071045	2.0976	down	protein_coding	NM_015175	CCDS46817.1	NBEAL2	RefSeq	8846	chr3	+	47021172	47051194	ACATCTGTCGCCAGCTTTTCCACCTCATCTACGGACAGCCAGATGTAGTGCGGCTTCTGG	23218	neurobeachin-like protein 2	3.69083	4.75957
ASHGA5P017794	0.000473785	0.0212428	2.09755	down	protein_coding	NM_138971	CCDS44740.1	BACE1	RefSeq	5732	chr11	-	117156401	117186972	CACCGACCTGCCTGACGACTCCCTGGAGCCTTTCTTTGACTCTCTGGTAAAGCAGACCCA	23621	beta-secretase 1 isoform C preproprotein	5.35383	6.42253
ASHGA5P014452	0.00143507	0.0274621	2.09674	down	protein_coding	NM_207411		XKR5	RefSeq	4908	chr8	-	6666040	6693166	ATTGCTCCTTGATGATGCTGCACCTCCTACAGCTTGGTGTTTGGAAGCGGCACTGGGACG	389610	XK-related protein 5	3.49957	4.56771
ASHGA5P030444	0.00091147	0.0246175	2.09545	down	protein_coding	NM_173611	CCDS10047.2	FAM98B	RefSeq	1556	chr15	+	38746327	38777063	AGGCCGGCCGAATGAAATTGAACCACCACCTCCAGAAATGCCCCCTTGGCAAAAGAGACA	283742	protein FAM98B isoform 1	9.0262	10.0935
ASHGA5P025224	0.011686	0.0477091	2.09541	down	protein_coding	NM_001242348		LOC100287177	RefSeq	960	chr19	+	46144904	46146092	TCAAGAGCTGACACACTGGAGGGATGGGGTTAGGGGACAGAAGAGGGCGACGCAGAGCAT	100287177	uncharacterized protein LOC100287177	5.57125	6.63848
ASHGA5P002259	0.00118582	0.0262037	2.09518	down	protein_coding	NM_020818	CCDS9911.2	UNC79	RefSeq	8471	chr14	+	93799564	94173689	TGAGACCCTGACCTCCAAAATTCGACAACAATCTCCTGAGAATGACAACACCATCAAGGA	57578	protein unc-79 homolog	5.78836	6.85543
ASHGA5P049048	0.020688	0.0659161	2.09381	down	protein_coding	NM_032569	CCDS10524.1	GLYR1	RefSeq	3747	chr16	-	4853203	4897303	TGCGTCGGCGGTGGTTGGGTGGTAAGATGGCGGCTGTGAGTCTGCGGCTCGGCGACTTGG	84656	putative oxidoreductase GLYR1	3.6674	4.73353
ASHGA5P010023	0.00808092	0.0394393	2.09355	down	protein_coding	NM_172081	CCDS5486.1	CAMK2B	RefSeq	4097	chr7	-	44256748	44365230	CTGCCGCCCTGGAGTCTTCTGACAGTGCCAATACCACCATAGAGGATGAAGACGCTAAAG	816	calcium/calmodulin-dependent protein kinase type II subunit beta isoform 5	4.84629	5.91225
ASHGA5P002784	0.00450126	0.0335929	2.09346	down	protein_coding	NM_015443	CCDS11503.1	KANSL1	RefSeq	5059	chr17	-	44107281	44270272	GGACAGGCACAAATTGGTCAGCTCCTTCCTAACAACAGCCAAGCTGTCCCATCACCAAAC	284058	KAT8 regulatory NSL complex subunit 1 isoform 1	3.74253	4.80842
ASHGA5P021577	0.00297823	0.0320346	2.09344	down	protein_coding	NM_001145140		CXorf49	RefSeq	1851	chrX	-	70934223	70938135	AATGACCCAAATAGAGATGAGGTCCCAAGAGCCCAACTTCCCACCCACAGGCCAGGACTG	100130361	uncharacterized protein CXorf49	5.15961	6.22548
ASHGA5P031424	0.000454708	0.0211759	2.0934	down	protein_coding	NM_005332	CCDS10397.1	HBZ	RefSeq	589	chr16	+	202853	204504	CGTCCTGGAGGTTCCCCAGCCCCACTTACCGCGTAATGCGCCAATAAACCAATGAACGAA	3050	hemoglobin subunit zeta	6.54615	7.61199
ASHGA5P011678	0.00015526	0.0155062	2.09209	down	protein_coding	NM_004408	CCDS6895.1	DNM1	RefSeq	3216	chr9	+	130965662	131017527	GGGTCCCCAGCCGATCGGGTCAGGCAAGTCCATCCCGTCCTGAGAGCCCCAGGCCCCCCT	1759	dynamin-1 isoform 1	6.32267	7.38761
ASHGA5P013323	0.000431924	0.0211743	2.09192	down	protein_coding	NM_171829	CCDS43172.1	KCNMB3	RefSeq	1856	chr3	-	178960553	178977679	CACTGCCAATGACAGCCTTTCCTGCCTCAGGGAAGAAGAGAGAGACAGACTACAGTGATG	27094	calcium-activated potassium channel subunit beta-3 isoform b	3.23346	4.29829
ASHGA5P000938	0.00841687	0.0401144	2.08932	down	protein_coding	NM_138481	CCDS46715.1	CHADL	RefSeq	2533	chr22	-	41625513	41636935	TCCCTTCCACTGTGACTGCCAGCTGCTTCCGCTGCACAGGTGGCTTACTGGGCTGAACCT	150356	chondroadherin-like protein precursor	3.71275	4.77579
ASHGA5P051397	7.18534e-05	0.0133794	2.08884	down	protein_coding	ENST00000383811	CCDS2593.1	CRELD1	GENCODE	2696	chr3	+	9975523	9987097	AGTGAAGCCTCTCCACGCCCTCTATCTGCAGGTCCCCAGCCTGGGTAAAGATGGCCCCAT	78987	cysteine-rich with EGF-like domains 1 [Source:HGNC Symbol;Acc:14630]	6.95027	8.01297
ASHGA5P001397	0.00859386	0.0404555	2.08844	down	protein_coding	NM_015895	CCDS4560.1	GMNN	RefSeq	1275	chr6	+	24775158	24786325	CGCGGCCTGGTCTTCTGTGCTTCACCATCTACATAATGAATCCCAGTATGAAGCAGAAAC	51053	geminin	4.6883	5.75073
ASHGA5P009410	0.00229144	0.0309205	2.08734	down	protein_coding	NM_001193424	CCDS53494.1	SUV39H2	RefSeq	3148	chr10	+	14920781	14946304	GCGCGAGGAGCTTGGTGTGTGCCTTGCCTAGTTTCACTTGATACTCTTCAGGAATTATGT	79723	histone-lysine N-methyltransferase SUV39H2 isoform 1	3.55103	4.6127
ASHGA5P034190	0.0226092	0.069706	2.08651	down	protein_coding	NM_006149	CCDS12521.1	LGALS4	RefSeq	1291	chr19	-	39292310	39303740	AGGGCTCACAGCTCGAAGAACCATCATCATCAAGGGCTATGTGCCTCCCACAGGCAAGAG	3960	galectin-4	3.72874	4.78983
ASHGA5P052082	0.0021816	0.0307811	2.0853	down	protein_coding	NM_031296	CCDS3747.1	RAB33B	RefSeq	3876	chr4	+	140374960	140397069	TTTTGCCTCCTGCCCGCTCCCGCATCTTCAAGATAATCGTGATCGGCGACTCCAATGTGG	83452	ras-related protein Rab-33B	8.55845	9.6187
ASHGA5P038819	0.000335804	0.0192182	2.08263	down	protein_coding	NM_015407	CCDS2843.1	ABHD14A	RefSeq	1118	chr3	+	52009041	52015216	GTGCCCATCGCACCCACCTCCACCCAGAACTACACCCAGGAGCAATTCTGGGCTGTGAAG	25864	abhydrolase domain-containing protein 14A	10.0506	11.109
ASHGA5P005742	0.0233511	0.0709725	2.08209	down	protein_coding	NM_003377	CCDS8062.1	VEGFB	RefSeq	1822	chr11	+	64002055	64006736	AGCCAGACAGGGCTGCCACTCCCCACCACCGTCCCCAGCCCCGTTCTGTTCCGGGCTGGG	7423	vascular endothelial growth factor B isoform VEGFB-186 precursor	8.99924	10.0573
ASHGA5P004930	0.00144578	0.0274621	2.08192	down	protein_coding	NM_006431	CCDS8991.1	CCT2	RefSeq	1962	chr12	+	69979207	69995357	CGGAACCATGGCGTCCCTTTCCCTTGCACCTGTTAACATCTTTAAGGCAGGAGCTGATGA	10576	T-complex protein 1 subunit beta isoform 1	9.7742	10.8321
ASHGA5P053862	0.035764	0.0940685	2.08004	down	protein_coding	NM_020064	CCDS6950.1	BARHL1	RefSeq	1907	chr9	+	135457992	135465640	GGTGGGTGGGGAGCTTTTGGGGAGGACAGGTCGCAGCTTGGCTATGGAAGGCTCCAATGG	56751	barH-like 1 homeobox protein	4.13358	5.19018
ASHGA5P014533	0.00668999	0.0361543	2.07618	down	protein_coding	NM_018153	CCDS46314.1	ANTXR1	RefSeq	2360	chr2	+	69240275	69373496	CACACACTGTAGCCTCCACAAAATTGCATCAGGCCCCACAACAGCTGCTTGCATGGAATA	84168	anthrax toxin receptor 1 isoform 3 precursor	4.44256	5.49649
ASHGA5P007320	0.00280362	0.0318783	2.07606	down	protein_coding	NM_153634	CCDS8733.1	CPNE8	RefSeq	3476	chr12	-	39046001	39299420	TGGAGGTGTCCGTGTCCTGCAGAAATCTTCTTGACAGAGACACATTTTCTAAATCTGATC	144402	copine-8	3.24424	4.29809
ASHGA5P013386	0.0180843	0.0605007	2.07591	down	protein_coding	NM_020701	CCDS43149.1	ISY1	RefSeq	3778	chr3	-	128846258	128880073	ATTTGCCTGGTGTTAGAGAGCTGTTTGAAAAAGAACCTCTTCCTCCTCCCAGAAAGACAC	57461	pre-mRNA-splicing factor ISY1 homolog isoform 2	6.84996	7.9037
ASHGA5P050869	0.00104507	0.0253141	2.07472	down	protein_coding	ENST00000448943	CCDS46558.1	TWIST2	GENCODE	1176	chr2	+	239756672	239795893	GTGGTCCATGTCCGCCTCCCACTAGCGCCGCGCCACCCACCTCCGGACCGGCGCGCCAGG	117581	twist homolog 2 (Drosophila) [Source:HGNC Symbol;Acc:20670]	6.76262	7.81554
ASHGA5P006146	0.00402121	0.0330909	2.07454	down	protein_coding	NM_199453	CCDS34271.1	HTR4	RefSeq	1440	chr5	-	147830594	148016624	ATGTACTAAGTGGCTGTTCCCCTGTCTCCAGCTTCCTCCTGCTCTTCTGCAATAGACCAG	3360	5-hydroxytryptamine receptor 4 isoform g	7.4653	8.51809
ASHGA5P054333	0.0287557	0.0812569	2.07375	down	protein_coding	NM_017634	CCDS6048.1	KCTD9	RefSeq	3417	chr8	-	25285363	25315984	GTGGGAGGGTGGCGGCTCACTCAGGACCCAGCGGGGGCAGCGCGATGAGGCGGGTGACCC	54793	BTB/POZ domain-containing protein KCTD9	4.86232	5.91456
ASHGA5P013260	0.0357252	0.0939908	2.07357	down	protein_coding	NM_001035513	CCDS41432.1	SDHC	RefSeq	2699	chr1	+	161284165	161334535	TGTTGCTGAGTTGGTCTCTTCCCATGGCGATGTCCATCTGCCACCGTGGCACTGGTATTG	6391	"succinate dehydrogenase cytochrome b560 subunit, mitochondrial isoform 4 precursor"	4.36283	5.41495
ASHGA5P012170	0.00022332	0.0182999	2.07265	down	protein_coding	ENST00000376207	CCDS14323.1	FOXP3	GENCODE	2382	chrX	-	49106896	49121288	ACTTACAGGCACTCCTCCAGGACAGGCCACATTTCATGCACCAGCTCTCAACGGTGGATG	50943	forkhead box P3 [Source:HGNC Symbol;Acc:6106]	4.47833	5.52981
ASHGA5P007861	0.000696745	0.023569	2.07013	down	protein_coding	NM_153450	CCDS7966.1	MED19	RefSeq	1605	chr11	-	57471186	57479673	GTCCCCCCAGGTAAACCCAGTTAAGTTCCGTATGGAGCTCTGGACTCCTAAATTCCCCTG	219541	mediator of RNA polymerase II transcription subunit 19	8.58187	9.6316
ASHGA5P026202	0.0187848	0.0618689	2.06925	down	protein_coding	NM_003390	CCDS7800.1	WEE1	RefSeq	3374	chr11	+	9595227	9611313	ACCCCGCCACACAAGACCTTCCGCAAGCTGCGACTCTTCGACACCCCGCACACGCCCAAG	7465	wee1-like protein kinase isoform 1	7.86529	8.9144
ASHGA5P001860	0.0310881	0.085593	2.0689	down	protein_coding	NM_005982	CCDS9748.1	SIX1	RefSeq	2687	chr14	-	61111416	61116155	CCAAGGAAAGGGAGAACACCGAAAACAATAACTCCTCCTCCAACAAGCAGAACCAACTCT	6495	homeobox protein SIX1	4.77331	5.82217
ASHGA5P049269	4.39585e-06	0.00559756	2.06659	down	protein_coding	NM_033309	CCDS45509.1	B3GNT9	RefSeq	2722	chr16	-	67182004	67184902	GGACTCCTAGCTCCCCACTACAGCCCCAAGCTCCTAACTCAGACCCAGAATGGAGCCGGT	84752	"UDP-GlcNAc:betaGal beta-1,3-N-acetylglucosaminyltransferase 9 precursor"	7.27061	8.31786
ASHGA5P029656	0.00939221	0.042486	2.06629	down	protein_coding	NM_001933	CCDS9833.1	DLST	RefSeq	2857	chr14	+	75348593	75370450	TTTAGGAGGAACCCACACACCCTACAAGTTGATCATGCAGGAACTGAAAACCAGTCTTCT	1743	"dihydrolipoyllysine-residue succinyltransferase component of 2-oxoglutarate dehydrogenase complex, mitochondrial isoform 1 precursor"	4.84274	5.88978
ASHGA5P045084	0.000634796	0.0232406	2.06527	down	protein_coding	NM_001008271	CCDS47941.1	SCXA	RefSeq	606	chr8	+	145321516	145323045	GGCGAGAACACCCAGCCCAAACAGATCTGCACCTTCTGCCTCAGCAACCAGAGAAAGTTG	100129885	basic helix-loop-helix transcription factor scleraxis	5.34706	6.39339
ASHGA5P012072	0.00587086	0.0347584	2.06337	down	protein_coding	NM_001135248	CCDS44071.1	MFAP2	RefSeq	1121	chr1	-	17300998	17307173	ACCCGGACAGCTGTCCTCTCTGACACCACCCCGGCCTGCCTCTTTGTTGCCATGAGAGCT	4237	microfibrillar-associated protein 2 isoform b precursor	9.45554	10.5005
ASHGA5P051503	0.00180473	0.0290776	2.06313	down	protein_coding	NM_001040454	CCDS46826.1	SLC26A6	RefSeq	2750	chr3	-	48663155	48671279	TGCCACCCCAGACCGAGGGACACACAGGCACTGCTGTCTGCAACACAAGCAATGGACCTG	65010	solute carrier family 26 member 6 isoform 4	5.42326	6.4681
ASHGA5P049638	0.0020483	0.0300663	2.06257	down	protein_coding	NM_001199417		ARHGAP23	RefSeq	5913	chr17	+	36584719	36668628	CTGCCACCCGATGAATGGAGTCGCCTTCTGCCTGGTCGGGATCCCGCCCCGCCCGGAGCC	57636	rho GTPase-activating protein 23	7.38864	8.43308
ASHGA5P017291	0.00362116	0.0329783	2.06006	down	protein_coding	NM_001136268	CCDS44888.1	DAZAP2	RefSeq	1936	chr12	+	51632507	51637717	CTACTCAGAGCCTCCACCTCCTGGATGCCCTCCCAATGCTGCTCAGCTTGCAGTCATGCA	9802	DAZ-associated protein 2 isoform e	8.23429	9.27698
ASHGA5P011757	0.0264782	0.0769612	2.05858	down	protein_coding	NM_001032221	CCDS35146.1	STXBP1	RefSeq	3850	chr9	+	130374485	130454995	GTGCTGATAGGATCCACACACATCCTCACCCCACAGAAACTGCTGGACACACTGAAGAAA	6812	syntaxin-binding protein 1 isoform b	5.86079	6.90244
ASHGA5P049478	0.0341135	0.0909485	2.05795	down	protein_coding	NM_001080424	CCDS32552.1	KDM6B	RefSeq	6704	chr17	+	7743234	7758118	CTCCCCCCAGGCCCCAGCCAGCACGTCGCGATGAGGCCGGACGCCCCGCCCGCCTGCCTG	23135	lysine-specific demethylase 6B	9.57025	10.6115
ASHGA5P004913	0.0187583	0.0618218	2.0549	down	protein_coding	NM_213596	CCDS9126.2	FOXN4	RefSeq	3356	chr12	-	109715782	109747025	AGGAATACAGGCTTCTAGCCACCACCAGCGATGATGACCTTCCCGGGGACCTGCAGTCGC	121643	forkhead box protein N4	3.39245	4.43151
ASHGA5P004560	0.0101826	0.0442723	2.05484	down	protein_coding	NM_012205	CCDS33187.1	HAAO	RefSeq	1301	chr2	-	42994228	43019751	CCCCCATCATCCAGGAGTTCTTCAGCTCTGAGCAGTACAGAACAGGAAAGCCCATCCCTG	23498	"3-hydroxyanthranilate 3,4-dioxygenase"	5.07235	6.11137
ASHGA5P038140	5.30436e-05	0.0123248	2.05449	down	protein_coding	NM_001145294	CCDS46777.1	NGLY1	RefSeq	2539	chr3	-	25760434	25831530	GCCCCTCTCGGAACCTCAGTGACTCGCCGATAATCGAGGACCTGCCAATAACGCGATGAG	55768	peptide-N(4)-(N-acetyl-beta- glucosaminyl)asparagine amidase isoform 3	5.99518	7.03396
ASHGA5P032426	0.000886853	0.0244834	2.0521	down	protein_coding	NM_021991	CCDS11407.1	JUP	RefSeq	3211	chr17	-	39910858	39942964	AGTCGTGTGCTCAAGGTGCTATCCGTGTGTCCCAGCAATAAGCCTGCCATTGTGGAGGCT	3728	junction plakoglobin	3.48135	4.51845
ASHGA5P001165	0.0362621	0.0950354	2.052	down	protein_coding	NM_003830	CCDS33088.1	SIGLEC5	RefSeq	2523	chr19	-	52114755	52133727	CTGTCCAGCTCAATGTCTCCTATGCTCCACAGACCATCACCATCTTCAGGAACGGCATAG	8778	sialic acid-binding Ig-like lectin 5 precursor	5.15061	6.18764
ASHGA5P013184	0.000430425	0.0211743	2.05088	down	protein_coding	NM_032304	CCDS32354.1	HAGHL	RefSeq	1379	chr16	+	777265	779715	AGCTGTCCTGGGCTAAGAAGAGGGATGAGGATGACGTGCCCACTGTGCCGTCGACTCTGG	84264	hydroxyacylglutathione hydrolase-like protein isoform 2	3.26868	4.30493
ASHGA5P009323	0.00911693	0.041762	2.05062	down	protein_coding	NM_133173	CCDS4229.1	APBB3	RefSeq	2146	chr5	-	139937852	139944189	TGTGTCTGACTCTCTCATGACTGCACACCCCATTCAGGCAGAGGCCAGTACAGAGGAGGA	10307	amyloid beta A4 precursor protein-binding family B member 3 isoform b	4.72945	5.76551
ASHGA5P042492	0.00488821	0.0338278	2.04908	down	protein_coding	NM_001044305	CCDS43478.1	SMAP1	RefSeq	3344	chr6	+	71377478	71571716	CTTCAGCCTTTGGTATCCTCTCCTTCTCTGCAAGCTGCTGTTGACAAAAATAAATTGGAG	60682	stromal membrane-associated protein 1 isoform A	7.13072	8.1657
ASHGA5P047410	0.0113857	0.0470912	2.04903	down	protein_coding	ENST00000395562	CCDS44389.1	CHAT	GENCODE	2528	chr10	+	50822082	50873150	CACCCTACTCCACACCAGAGATGTGGCCGGAATGCAGAGATGAAGCACTGAGCACAGTAG	1103	choline O-acetyltransferase [Source:HGNC Symbol;Acc:1912]	4.24952	5.28445
ASHGA5P018723	0.00370565	0.0329783	2.04846	down	protein_coding	NM_001015880	CCDS44453.1	PAPSS2	RefSeq	3874	chr10	+	89419475	89507462	ATGGCCCTTCCTGATGGCGTGATCAACATGAGCATCCCCATTGTACTGCCCGTCTCTGCA	9060	bifunctional 3'-phosphoadenosine 5'-phosphosulfate synthase 2 isoform b	5.43547	6.47002
ASHGA5P008678	0.00260912	0.0316606	2.04838	down	protein_coding	NM_007247	CCDS11321.1	SYNRG	RefSeq	8181	chr17	-	35874899	35969486	AAGAAACCAGGCCCTTCCTTGGAGGAGAAGTTCCTAGTATCTTGTGATATAAGTACATCT	11276	synergin gamma isoform 1	4.07879	5.11327
ASHGA5P013677	8.85948e-05	0.0145843	2.04728	down	protein_coding	NM_001729	CCDS3566.1	BTC	RefSeq	1323	chr4	-	75671447	75719882	CATGCTGTCACCCTCTTCGGAAACGTCGTAAAAGAAAGAAGAAAGAAGAAGAAATGGAAA	685	probetacellulin precursor	4.32956	5.36327
ASHGA5P053823	0.000193013	0.0169924	2.04408	down	protein_coding	NM_001011703	CCDS48022.1	FAM125B	RefSeq	2705	chr9	+	129089122	129159912	ACCTTCCCAGGTGAGGCCTTGTCGGGGTGTCTTGCGTTGTCCTGTGGTCTTAGGTCCCTG	89853	multivesicular body subunit 12B isoform 2	3.75885	4.7903
ASHGA5P018139	0.000528499	0.0218415	2.04372	down	protein_coding	NM_001080506	CCDS47087.1	TMEM150C	RefSeq	1888	chr4	-	83405603	83483126	GTGGTCCTCTACTTCATCCTCATGGCCCAAAGCATCCACATGTATGCAGCCAGGGTCCAG	441027	transmembrane protein 150C	4.11558	5.14677
ASHGA5P018494	0.000664841	0.0233011	2.04356	down	protein_coding	NM_001193380	CCDS54552.1	IL17RE	RefSeq	2790	chr3	+	9944511	9958084	CTGTGTCCTGCTCCATGCTTCACTCAGCTCCCCGGGAGGAGAAGATGCCTGGCTCATAGG	132014	interleukin-17 receptor E isoform 6 precursor	5.55942	6.5905
ASHGA5P010880	0.000995868	0.0251671	2.04282	down	protein_coding	NM_001185093	CCDS53402.1	NIT1	RefSeq	1767	chr1	+	161087906	161090984	TTCAGTTTAATGCCCAGAGCCATGGCTATCTCCTCTTCCTCCTGCGAACTGCCCCTGGTG	4817	nitrilase homolog 1 isoform 3	6.09906	7.12962
ASHGA5P011010	0.000492769	0.0213296	2.04256	down	protein_coding	NM_032563	CCDS1014.1	LCE3D	RefSeq	617	chr1	-	152551859	152552980	CCTCCTCTGCACCTGGACAACTCAACTCCTGCCAAGATGTCCTGCCAGCAGAACCAGCAG	84648	late cornified envelope protein 3D	6.22295	7.25333
ASHGA5P012845	0.0130986	0.0507486	2.04043	down	protein_coding	NM_014336	CCDS11075.1	AIPL1	RefSeq	2981	chr17	-	6327058	6338519	CGACACCATCCACACGGGGGTCTACCCCATCCTATCCCGGAGCCTGAGGCAGATGGCCCA	23746	aryl-hydrocarbon-interacting protein-like 1 isoform 1	4.76767	5.79654
ASHGA5P015715	0.00621769	0.035326	2.03859	down	protein_coding	NM_001098514	CCDS45404.2	C16orf89	RefSeq	1575	chr16	-	5094122	5116146	GAAAAACAATTTCCAGATGGCTGCTCCTCCCACAACACAGCCACAGCAGTGGCAGCCCTG	146556	UPF0764 protein C16orf89 isoform 2 precursor	4.90753	5.9351
ASHGA5P047277	0.00508789	0.0338278	2.03804	down	protein_coding	ENST00000239761	CCDS7123.1	MRC1	GENCODE	5171	chr10	+	18098351	18200091	ACCTCACAAGTATCCACACCATCGAGGAATTGGACTTTATTATCTCCCAGCTAGGATATG	4360	"mannose receptor, C type 1 [Source:HGNC Symbol;Acc:7228]"	3.46092	4.4881
ASHGA5P003945	8.94213e-05	0.0145843	2.03796	down	protein_coding	NM_152834	CCDS33141.1	TMEM18	RefSeq	2138	chr2	-	667972	677439	TTCTCTGTCAGCTCTTTCCCCGTCAGCATCCCAGCCGTGCTCACGCAGACGGACTGGACT	129787	transmembrane protein 18	6.12329	7.15041
ASHGA5P046791	0.0248641	0.0737286	2.03639	down	protein_coding	NM_000451	CCDS14107.1	SHOX	RefSeq	3757	chrY	+	535078	557558	GTTACAACCGCTGTAAAATGACGGAGAGAGAGAGAAAGAATCCCAGACATTAACGGTATT	6473	short stature homeobox protein isoform SHOXa	3.05348	4.0795
ASHGA5P008551	0.00287586	0.0318783	2.03569	down	protein_coding	NM_206925	CCDS10186.1	CA12	RefSeq	3959	chr15	-	63615729	63674075	TTCTCCCAAGGCATCATCCTCTCACTGGCCCTGGCTGGCATTCTTGGCATCTGTATTGTG	771	carbonic anhydrase 12 isoform 2 precursor	6.94572	7.97124
ASHGA5P045588	0.0183	0.0609223	2.03456	down	protein_coding	NM_015158	CCDS34976.1	KANK1	RefSeq	5090	chr9	+	504694	746106	TAAAATTTGCATGACTCCTCACTCCTTTCTGGATCTCTCATTGGACTCAAGCCAGCATGG	23189	KN motif and ankyrin repeat domain-containing protein 1 isoform a	4.30769	5.33241
ASHGA5P032122	0.016591	0.0575068	2.0344	down	protein_coding	NM_002479	CCDS1433.1	MYOG	RefSeq	1744	chr1	-	203052256	203055166	TTCTATGATGGGGAAAACTACCTGCCTGTCCACCTCCAGGGCTTCGAACCACCAGGCTAC	4656	myogenin	5.45596	6.48056
ASHGA5P043743	0.00327522	0.0326774	2.03419	down	protein_coding	NM_001099435		SPDYE5	RefSeq	2667	chr7	+	75124298	75133628	TCGGGGTCTAAGGTGATCAGATGCAGAAGCATTACACGGTGGCCTGGTTTCTTTACTCAG	442590	putative speedy protein E5	3.7747	4.79916
ASHGA5P043745	0.0185641	0.0614674	2.03176	down	protein_coding	ENST00000318622	CCDS43603.1	RHBDD2	GENCODE	1878	chr7	+	75508316	75518244	GGCTCATTCCCCAGACCTCTTTCCTCAGTAATGTCTGCGGGCTGTCCATCGGGCTGGCCT	57414	rhomboid domain containing 2 [Source:HGNC Symbol;Acc:23082]	5.50953	6.53225
ASHGA5P017996	0.0381808	0.098244	2.03103	down	protein_coding	NM_001083113	CCDS13535.1	ZGPAT	RefSeq	1925	chr20	+	62338793	62367494	CAGGCGCCGGCCCTGGTCCAGCGCCTCCCTCTCTCAGCATGGACGAGGAGAGCCTGGAGT	84619	zinc finger CCCH-type with G patch domain-containing protein isoform c	4.79627	5.81848
ASHGA5P051299	0.00146921	0.0274621	2.02774	down	protein_coding	ENST00000249007	CCDS43011.1	RFPL3	GENCODE	1488	chr22	+	32753853	32757148	TACTTTTCCCCTGGCAGTGGACATGGCTGCACTCTTCCAAGAAGCAAGCAGCTGTCCCGT	10738	ret finger protein-like 3 [Source:HGNC Symbol;Acc:9980]	4.61697	5.63684
ASHGA5P037081	0.0211059	0.0667307	2.02758	down	protein_coding	NM_020708	CCDS13391.1	SLC12A5	RefSeq	6084	chr20	+	44657820	44688789	CCGCCACCATGCTAAACAACCTGACGGACTGCGAGGACGGCGATGGGGGAGCCAACCCGG	57468	solute carrier family 12 member 5 isoform 2	4.72215	5.74191
ASHGA5P005896	0.00513678	0.0338278	2.02747	down	protein_coding	NM_002716	CCDS8349.1	PPP2R1B	RefSeq	5605	chr11	-	111608604	111637169	CTGTCTGCTGCCTCCTTTGGAAAATCTGGCAACTGTGGAAGAGACTGTTGTTCGTGACAA	5519	serine/threonine-protein phosphatase 2A 65 kDa regulatory subunit A beta isoform isoform a	4.37791	5.39759
ASHGA5P003106	0.0307574	0.0848661	2.02734	down	protein_coding	NM_022552	CCDS33157.1	DNMT3A	RefSeq	4324	chr2	-	25455829	25564784	GAAAATGGAGGGCTCCCGGGGCCGGCTGCGGGGTGGCTTGGGCTGGGAGTCCAGCCTCCG	1788	DNA (cytosine-5)-methyltransferase 3A isoform a	3.50956	4.52914
ASHGA5P026100	0.00542545	0.0343038	2.02595	down	protein_coding	NM_000797	CCDS7710.1	DRD4	RefSeq	1378	chr11	+	637304	640705	GACTACGTGGTCTACTCGTCCGTGTGCTCCTTCTTCCTACCCTGCCCGCTCATGCTGCTG	1815	D(4) dopamine receptor	7.15364	8.17224
ASHGA5P052669	0.0211329	0.0667951	2.02586	down	protein_coding	NM_001002029	CCDS47405.1	C4B	RefSeq	5444	chr6	+	31949833	31970458	AGAAGGTAGCAGACAGACAGACGGATCTAACCTCTCTTGGATCCTCCAGCCATGAGGCTG	721	complement C4-B preproprotein	3.4827	4.50124
ASHGA5P049312	0.00159415	0.0280187	2.02583	down	protein_coding	NM_001160213	CCDS54034.1	PMFBP1	RefSeq	3690	chr16	-	72152995	72206349	CTTCCCACAGCCACCTCCACAGTGTAATGGTCCACTTGCAGCAGGAAAACAAGAAGCTGA	83449	polyamine-modulated factor 1-binding protein 1 isoform b	5.76031	6.77882
ASHGA5P012093	0.00269838	0.0318783	2.02563	down	protein_coding	NM_025258	CCDS4721.2	VWA7	RefSeq	2914	chr6	-	31733370	31745108	AGCCCCGCAGGACCGGCACACCACCCCTACCGGCTCATCTGACCCGATCCTCACCACGGC	80737	von Willebrand factor A domain-containing protein 7 precursor	8.34745	9.36583
ASHGA5P046812	0.0136601	0.0518465	2.02561	down	protein_coding	ENST00000457222	CCDS48204.1	TSPY3	GENCODE	1161	chrY	+	9236029	9238826	AGTGAGCAGGCGGCTTTGGGGGAGGAGGCGGTGCTGCTGTTGGATGACATAATGGCGGAG	728137	"testis specific protein, Y-linked 3 [Source:HGNC Symbol;Acc:33876]"	4.22158	5.23994
ASHGA5P006538	0.000396527	0.0203269	2.02545	down	protein_coding	ENST00000319836	CCDS7213.1	MARCH8	GENCODE	2496	chr10	-	45952816	46090354	ACTTCTATCACGCCATCCAGCCAGGACATCTGCAGGATCTGCCACTGTGAAGGAGATGAT	220972	"membrane-associated ring finger (C3HC4) 8, E3 ubiquitin protein ligase [Source:HGNC Symbol;Acc:23356]"	3.72493	4.74318
ASHGA5P052647	0.000663556	0.0233011	2.0246	down	protein_coding	NM_001243042	CCDS34393.1	HLA-C	RefSeq	1586	chr6	-	31236525	31239913	TAAAGTCCCCAGTCACCCACCCGGACTCACATTCTCCCCAGAGGCCGAGATGCGGGTCAT	3107	"HLA class I histocompatibility antigen, Cw-1 alpha chain precursor"	6.99117	8.00881
ASHGA5P007429	0.00127087	0.0266481	2.02446	down	protein_coding	NM_003490	CCDS13908.1	SYN3	RefSeq	3047	chr22	-	32908539	33402806	GCAGGGTGAAGAGTCCAAGAAGCCAGCACCACCCCATCCGCATCTCAACAAATCTCAGTC	8224	synapsin-3 isoform IIIa	7.17111	8.18865
ASHGA5P011927	0.000216002	0.018217	2.02354	down	protein_coding	NM_173160	CCDS7203.1	FXYD4	RefSeq	787	chr10	+	43867091	43871783	GGAGAGAGTGACCCTGGCCCTTCTCCTACTGGCAGGCCTGACTGCCTTGGAAGCCAATGA	53828	FXYD domain-containing ion transport regulator 4 precursor	6.14529	7.16217
ASHGA5P008289	0.00292014	0.0319884	2.02348	down	protein_coding	NM_001080462	CCDS32287.1	TMEM202	RefSeq	1296	chr15	+	72690667	72700708	TGAGCTGTGCTGGAGCCACACACCCAAGCCACCCTATTATCTCCAATATTCCAGGGCCTT	338949	transmembrane protein 202	5.76807	6.78491
ASHGA5P014489	0.000366204	0.0197382	2.02311	down	protein_coding	NM_033066	CCDS46491.1	MPP4	RefSeq	2475	chr2	-	202509596	202563417	CTCAGCCGTACCAGCCTCACACCTGCCTCAAGTCAACCCTATCAATTTCTATGGAAGAAG	58538	MAGUK p55 subfamily member 4	5.78301	6.79959
ASHGA5P053976	0.00116149	0.0260618	2.02289	down	protein_coding	NM_013271	CCDS14307.1	PCSK1N	RefSeq	990	chrX	-	48689505	48693960	TCAGTGCCCCGAGGTGAGGCGGCGGGGGCGGTGCAGGAGCTGGCGCGGGCGCTGGCGCAT	27344	proSAAS precursor	4.26355	5.27996
ASHGA5P017981	0.00276608	0.0318783	2.0214	down	protein_coding	NM_001102653	CCDS47139.1	OTUD4	RefSeq	7068	chr4	-	146054801	146100832	TATGAGATTCAGAACAGAGATGAACAGGCTTTCCCAGCCCTTTCCAGCTCATCAGTCAAT	54726	OTU domain-containing protein 4 isoform 3	5.64282	6.65817
ASHGA5P001072	0.00603734	0.0348208	2.02118	down	protein_coding	NM_001042539	CCDS42144.1	MAZ	RefSeq	2789	chr16	+	29817854	29822504	ACAGCCCACCTGCTGAGGGGGACCCCCGCACCCACCAGGTACTGGTGAGGTTTGTCCAAT	4150	myc-associated zinc finger protein isoform 2	5.20469	6.21989
ASHGA5P039969	0.00247573	0.0313471	2.02115	down	protein_coding	NM_152997	CCDS3537.1	FDCSP	RefSeq	573	chr4	+	71091787	71100968	CCCCTACAACTCCCCTTCCTAGCGAAAAGTAAACAAGAAGGAAAAGTCACGATAAACCTG	260436	follicular dendritic cell secreted peptide precursor	6.93022	7.9454
ASHGA5P009796	0.00374444	0.0329783	2.02078	down	protein_coding	ENST00000357330	CCDS12940.1	GALP	GENCODE	938	chr19	+	56687388	56697144	TCTGGGTCCCGTCCTCCACCTTCCCCAAATGGGTGACCAAGACGGAAAGAGGGAGACAGC	85569	galanin-like peptide [Source:HGNC Symbol;Acc:24840]	6.79747	7.81238
ASHGA5P013580	0.00028434	0.0187505	2.01957	down	protein_coding	NM_001042454	CCDS42156.1	TGFB1I1	RefSeq	1813	chr16	+	31483475	31489281	GAGGACCTGGATGCCCTGCTCTCTGACCTGGAGACTACCACCTCGCACATGCCAAGGTCA	7041	transforming growth factor beta-1-induced transcript 1 protein isoform 1	6.00978	7.02383
ASHGA5P004708	0.0287469	0.0812569	2.01939	down	protein_coding	ENST00000296422	CCDS34041.1	SLC9B1	GENCODE	1879	chr4	-	103822084	103940896	TTCTATTAGGTTTTGTTCTAGGTGCTGTCTCTCCTGCTGTTGTTGTCCCTTACATGATGG	150159	"solute carrier family 9, subfamily B (NHA1, cation proton antiporter 1), member 1 [Source:HGNC Symbol;Acc:24244]"	5.18671	6.20062
ASHGA5P049841	0.0325863	0.0882393	2.01854	down	protein_coding	NM_015353	CCDS32728.1	KCTD2	RefSeq	3714	chr17	+	73043278	73061981	GGAGGGGGCGGCGGGAGTGGGGTGGGCGACGGGGGTGGCCCAGTCCGCGGGCCCCCCAGC	23510	BTB/POZ domain-containing protein KCTD2	5.37032	6.38363
ASHGA5P040282	0.00409992	0.0330909	2.01701	down	protein_coding	NM_012147		DUX2	RefSeq	1540	chr4	+	190988866	190990406	TCGCTGGAAGCACCCCTCAGCGAGGAAGAATACCGGGCTCTGCTGGAGGAGCTTTAGGAC	26583	putative double homeobox protein 2	4.65295	5.66517
ASHGA5P052935	0.0141321	0.0527669	2.01697	down	protein_coding	NM_005598	CCDS1204.1	NHLH1	RefSeq	2594	chr1	+	160336860	160342638	TGATCTCACAGGGCAGGGGGCTTCCATCATGATGCTCAACTCAGACACCATGGAGCTGGA	4807	helix-loop-helix protein 1	3.76414	4.77633
ASHGA5P051292	0.00325174	0.0326774	2.01577	down	protein_coding	NM_005877	CCDS13875.1	SF3A1	RefSeq	5136	chr22	-	30727976	30752913	CATCGTGCCCAAAGAGCCTCCTCCTGAGTTTGAGTTCATTGCTGATCCTCCCTCTATCTC	10291	splicing factor 3A subunit 1 isoform 1	6.35444	7.36577
ASHGA5P054117	0.00480725	0.0338278	2.01539	down	protein_coding	NM_205833	CCDS14630.1	IGSF1	RefSeq	1963	chrX	-	130418139	130423403	GTTGTAGCAGGTGGGTGTGGCTATGGCTGCTGGCATCTGGCAATTGTTGTCCCAGGTATC	3547	immunoglobulin superfamily member 1 isoform 2 precursor	4.30225	5.31332
ASHGA5P002087	0.000782179	0.023569	2.0149	down	protein_coding	NM_001044387	CCDS42485.1	ZNF557	RefSeq	5990	chr19	+	7069470	7087978	CCAACTGCCGCTCTGTCTTCCCTGTTCCCAGCCTCTCAGCGAGAAGGACACACAGAGGGC	79230	zinc finger protein 557 isoform a	6.4847	7.4954
ASHGA5P053130	0.0302634	0.0839349	2.01484	down	protein_coding	NM_178550	CCDS44269.1	C1orf110	RefSeq	1552	chr1	-	162824086	162838605	TCCTAGTTCCAGCCCAGCTAGTGATAGTGGAATGGCATGTGCTGATGAGACCAGATCAAA	339512	coiled-coil domain-containing protein C1orf110	4.93661	5.94728
ASHGA5P002149	7.18631e-05	0.0133794	2.01402	down	protein_coding	NM_018898	CCDS4241.1	PCDHAC1	RefSeq	5475	chr5	+	140306301	140391929	GAATAGGAAAGGGGATCACGCTAATGTCAATGCCATGCCACGACAGCCCAACCCTGACTG	56135	protocadherin alpha-C1 isoform 1 precursor	3.5168	4.52687
ASHGA5P012048	0.00123217	0.026401	2.01228	down	protein_coding	NM_004187	CCDS14351.1	KDM5C	RefSeq	6863	chrX	-	53220502	53254604	AGGTAAGAGAGATCTGGAGCTGCTGTCCTCGCTGTTGCCACAGTTGACTGGCCCTGTGTT	8242	lysine-specific demethylase 5C isoform 1	4.01091	5.01974
ASHGA5P043186	0.00203667	0.0300663	2.01092	down	protein_coding	ENST00000359558	CCDS55125.1	CALCR	GENCODE	3696	chr7	-	93053798	93204042	AATAAATGATTCCCACTGATCCACCCACTTTTGCCACCCCAGGATGCAATTTTCTGGAGA	799	calcitonin receptor [Source:HGNC Symbol;Acc:1440]	7.60214	8.60999
ASHGA5P009946	0.0308658	0.0850923	2.00946	down	protein_coding	NM_024816	CCDS42140.1	RABEP2	RefSeq	2280	chr16	-	28915741	28936532	CCAGGGCCAGCCTGGAGGGGCAGCTGAGGGTGCAGCGGGAGGAGACAGAGGTGCTGGAGG	79874	rab GTPase-binding effector protein 2	3.45404	4.46085
ASHGA5P048998	0.00103865	0.0253141	2.00705	down	protein_coding	ENST00000248121	CCDS10456.1	SYNGR3	GENCODE	2051	chr16	+	2039945	2044276	GCCCTGGACCCCGTGAGCTTTGCGCGGCGGCCCCAGACCCTGCTCCGGGTCGCGTCCTGG	9143	synaptogyrin 3 [Source:HGNC Symbol;Acc:11501]	8.25472	9.2598
ASHGA5P037266	0.00274694	0.0318783	2.00697	down	protein_coding	NM_181604	CCDS13600.1	KRTAP6-2	RefSeq	189	chr21	-	31971004	31971193	TACGGCTCCCGCTTCTTCTGTGGCTGTGGCTATGGATGCGGCTCTGGCTACTACTATTGA	337967	keratin-associated protein 6-2	5.12502	6.13004
ASHGA5P013881	0.0125111	0.0495937	2.00668	down	protein_coding	NM_024623	CCDS41855.1	OGFOD2	RefSeq	2080	chr12	+	123459353	123464588	ATGACTGTCTCCTGTCCCTGTGTGGGCCCAGATGGTTGAGCTTGAGCAGGAGGTGGAGCG	79676	2-oxoglutarate and iron-dependent oxygenase domain-containing protein 2	4.80684	5.81165
ASHGA5P029878	6.60197e-06	0.00560452	2.00637	down	protein_coding	NM_000814	CCDS10019.1	GABRB3	RefSeq	5783	chr15	-	26788693	27018223	AAGGCTTTTCGGCATCTTCTCGGCCCCGGTGCTGGTGGCTGTGGTGTGCTGCGCCCAGAG	2562	gamma-aminobutyric acid receptor subunit beta-3 isoform 1 precursor	5.03463	6.03922
ASHGA5P045990	0.000485396	0.0212828	2.00563	down	protein_coding	NM_015354	CCDS35156.1	NUP188	RefSeq	5689	chr9	+	131709976	131769374	AGCAGCTGGACCCTCTTTACCTGCGAGATTGAAATGTTGCTTCATGTTGTTTCAACTGCA	23511	nucleoporin NUP188 homolog	4.11895	5.12301
ASHGA5P040269	0.0340295	0.0908408	2.00475	down	protein_coding	NM_000892	CCDS34120.1	KLKB1	RefSeq	2252	chr4	+	187148671	187179625	TAAAATAACCCAACGGATGGTCTGTGCTGGCTATAAAGAAGGGGGAAAAGATGCTTGTAA	3818	plasma kallikrein preproprotein	5.53531	6.53873
ASHGA5P015336	0.00479849	0.0338278	2.00442	down	protein_coding	ENST00000419421	CCDS45933.1	PRR22	GENCODE	1392	chr19	-	5782970	5784776	AGAGGTGTTTCCAGCCCCACCAGCAGGTTTCCAGATGGCCCCATGCGGGTGCTTCTTCGA	163154	proline rich 22 [Source:HGNC Symbol;Acc:28354]	6.43598	7.43917
ASHGA5P046439	0.00324076	0.0326774	2.00194	down	protein_coding	NM_005470	CCDS7150.1	ABI1	RefSeq	3725	chr10	-	27035524	27150016	CTTCTGGAGCTCCACCAGCACCACCTCTGGCACCACTTCTCCCAGTGAGCACTGTGATAG	10006	abl interactor 1 isoform a	9.65588	10.6573
