# Supplementary material for: Age and poverty status alter the coding and noncoding transcriptome
Source: Aging (Albany NY). 2019 Feb 17;11(4):1189–203. doi: 10.18632/aging.101823 (PMC6402526; doi:10.18632/aging.101823)
Supplement: Supplementary Table 10 [file aging-11-101823-s011.xlsx]

## Sheet: Sheet1
Supplementary Table 10. Primer sequences for RT-qPCR validation
Gene	Forward sequence	Reverse sequence
AK022914 (DUXAP9)	CAAGAGCCAGAACATGGTGA	GGCTTAGCTTGCACTTTTGG
AK027145	CAGTTTAACCCGCATCACCT	CAAGCAATTCTCATGCCTCA
CTD-3247F14.2 (LNCipedia: lnc-EGR3-1)	CTTCTCCAGGGCAGAAACAG	CCGTCCCAGATCACTCGTAT
D63785	TGCAACCAGTTCTCTGCATC	TTTCTGGACCCACTCCTCAC
GAS5	GAAATGCAGGCAGACCTGTT	TCCCAACATTTCCAATCCTC
H19	AGGAATCGGCTCTGGAAGGT	GCGGGCGCTGCTGTT
HPRT1	AGATGGTCAAGGTCGCAAGCT	GGGCATATCCTACAACAAACTTGTC
KB-1047C11.2 (LNCipedia: C8orf37-AS1:1)	GGCAGCCAAAATAAAGGTGA	CAGCTGAGGTCCGAAAAGAG
MALAT1	TGCCTTGTGAGCACTTT	GCACGGAAATTTTTCTACCG
MEG3	GCATTAAGCCCTGACCTTTG	TCCAGTTTGCTAGCAGGTGA
NEAT1	GGGGAGAGGGTTGGTTAGAG	GGTTCTCGGAAAACTGGTGA
RNF157-AS1	CCTCCTACGTCCTTGCTCTG	GGTCAAGGAGACAGGTCCAA
TERC	GCGCCGTGCTTTTGCT	TTTTCCGCCCGCTGAA
UBC	ATTTGGGTCGCGGTTCTTG	TGCCTTGACATTCTCGATGGT
XLOC_003262 (LNCipedia: lnc-KY-1)	GAAACCATACCAGGGCTTCA	TCTCCAGTTTACCCCACAGG
